# Supplementary material
Source: publisher figshare collection journal article supplement (https://gsapubs.figshare.com/articles/dataset/_/15145527)

Tables 2 contains the isotopic data for all DZUPB ages shown in this paper per groups.

Price River Canyon

| Sample Name:   |         |        |         |          |         |          |         |                   |          |                     |          |                     |          |                  |          |                |  |
|----------------|---------|--------|---------|----------|---------|----------|---------|-------------------|----------|---------------------|----------|---------------------|----------|------------------|----------|----------------|--|
| Grain #        | [U] ppm | U/Th   | 207/235 | 2σ error | 206/238 | 2σ error | RHO     | 207/235<br>Age Ma | 2σ error | 206/238<br>Age (Ma) | 2σ error | 206/207<br>Age (Ma) | 2σ error | Best age<br>(Ma) | 2σ error | % Discordance* |  |
| 13PRUC_1.FIN2  | 243     | 0.5874 | 0.7587  | 0.0093   | 0.09367 | 0.00078  | 0.74452 | 573               | 5.4      | 577.2               | 4.6      | 543                 | 21       | 577.2            | 4.6      | 0.732984       |  |
| 13PRUC_2.FIN2  | 118.7   | 0.98   | 8.65    | 0.15     | 0.4304  | 0.0057   | 0.96244 | 2300              | 17       | 2307                | 26       | 2276                | 17       | 2276             | 17       | 1.362039       |  |
| 13PRUC_3.FIN2  | 108.7   | 0.655  | 4.172   | 0.036    | 0.2985  | 0.0026   | 0.79656 | 1668.1            | 7.1      | 1684                | 13       | 1643.8              | 8.3      | 1643.8           | 8.3      | 2.445553       |  |
| 13PRUC_4.FIN2  | 18.99   | 0.823  | 4.115   | 0.095    | 0.2885  | 0.0064   | 0.97931 | 1656              | 19       | 1633                | 32       | 1683                | 23       | 1683             | 23       | 2.970885       |  |
| 13PRUC_5.FIN2  | 23.45   | 0.548  | 0.575   | 0.023    | 0.072   | 0.0021   | 0.98059 | 459               | 15       | 448                 | 13       | 570                 | 43       | 448              | 13       | 2.396514       |  |
| 13PRUC_6.FIN2  | 32.9    | 1.269  | 4.653   | 0.051    | 0.3221  | 0.0029   | 0.87271 | 1758.1            | 9.3      | 1800                | 14       | 1711                | 13       | 1711             | 13       | 5.201636       |  |
| 13PRUC_7.FIN2  | 137     | 0.732  | 0.5488  | 0.0091   | 0.07198 | 0.00076  | 0.88898 | 443.9             | 6        | 448.1               | 4.6      | 432                 | 20       | 448.1            | 4.6      | 0.946159       |  |
| 13PRUC_8.FIN2  | 115.1   | 1.438  | 1.974   | 0.02     | 0.1883  | 0.0021   | 0.83323 | 1108.1            | 7.2      | 1112                | 11       | 1086                | 15       | 1112             | 11       | 0.351954       |  |
| 13PRUC_9.FIN2  | 142.8   | 1.735  | 4.506   | 0.041    | 0.3095  | 0.003    | 0.90204 | 1731.6            | 7.6      | 1738                | 15       | 1720.3              | 8.5      | 1720.3           | 8.5      | 1.02889        |  |
| 13PRUC_10.FIN2 | 122.1   | 1.208  | 2.412   | 0.095    | 0.2147  | 0.0025   | 0.78206 | 1243              | 26       | 1254                | 13       | 1234                | 56       | 1234             | 56       | 1.620746       |  |
| 13PRUC_11.FIN2 | 71.8    | 0.882  | 5.228   | 0.065    | 0.3354  | 0.0046   | 0.95171 | 1856              | 11       | 1864                | 22       | 1847                | 10       | 1847             | 10       | 0.920411       |  |
| 13PRUC_12.FIN2 | 318     | 1.077  | 2.063   | 0.014    | 0.1964  | 0.0014   | 0.7191  | 1136.5            | 4.6      | 1155.8              | 7.5      | 1096                | 8.8      | 1155.8           | 7.5      | 1.698196       |  |
| 13PRUC_13.FIN2 | 104     | 1.937  | 1.87    | 0.021    | 0.1839  | 0.0016   | 0.70975 | 1071.2            | 7.1      | 1088.3              | 8.8      | 1037                | 13       | 1088.3           | 8.8      | 1.596341       |  |
| 13PRUC_14.FIN2 | 34.69   | 0.69   | 1.912   | 0.031    | 0.1835  | 0.0023   | 0.88012 | 1084              | 11       | 1086                | 12       | 1087                | 22       | 1086             | 12       | 0.184502       |  |
| 13PRUC_15.FIN2 | 486     | 1.319  | 10.459  | 0.068    | 0.466   | 0.0036   | 0.95159 | 2476.8            | 5.8      | 2466                | 16       | 2487.9              | 4.9      | 2487.9           | 4.9      | 0.88026        |  |
| 13PRUC_16.FIN2 | 27.9    | 0.5703 | 14.43   | 0.19     | 0.5405  | 0.0072   | 0.982   | 2777              | 13       | 2784                | 30       | 2764                | 11       | 2764             | 11       | 0.723589       |  |
| 13PRUC_17.FIN2 | 141.6   | 1.383  | 16.69   | 0.11     | 0.5889  | 0.0044   | 0.95322 | 2916.6            | 6.4      | 2985                | 18       | 2872.3              | 4.8      | 2872.3           | 4.8      | 3.923685       |  |
| 13PRUC_18.FIN2 | 58.8    | 0.523  | 1.476   | 0.056    | 0.1342  | 0.0047   | 0.9743  | 925               | 22       | 811                 | 27       | 1188                | 43       | 811              | 27       | 12.32432       |  |
| 13PRUC_18.FIN2 | 30.59   | 0.5619 | 1.819   | 0.038    | 0.1738  | 0.003    | 0.91498 | 1053              | 13       | 1033                | 16       | 1102                | 27       | 1033             | 16       | 1.899335       |  |
| 13PRUC_19.FIN2 | 116.7   | 0.973  | 4.117   | 0.034    | 0.2966  | 0.0024   | 0.87105 | 1657.3            | 6.9      | 1674                | 12       | 1637.9              | 7.8      | 1637.9           | 7.8      | 2.204042       |  |
| 13PRUC_20.FIN2 | 40.7    | 1.174  | 1.964   | 0.033    | 0.1861  | 0.0022   | 0.86356 | 1102              | 11       | 1100                | 12       | 1114                | 17       | 1100             | 12       | 0.181488       |  |
| 13PRUC_21.FIN2 | 279     | 6.51   | 0.519   | 0.015    | 0.0684  | 0.0019   | 0.66023 | 424               | 10       | 427                 | 11       | 440                 | 45       | 427              | 11       | 0.707547       |  |
| 13PRUC_21.FIN2 | 99.8    | 1.397  | 2.276   | 0.053    | 0.1965  | 0.0047   | 0.96935 | 1205              | 17       | 1156                | 25       | 1297                | 13       | 1156             | 25       | 4.06639        |  |
| 13PRUC_22.FIN2 | 42.3    | 0.7617 | 1.886   | 0.033    | 0.1805  | 0.0022   | 0.82891 | 1077              | 11       | 1069                | 12       | 1082                | 20       | 1069             | 12       | 0.742804       |  |
| 13PRUC_23.FIN2 | 106     | 32.4   | 1.799   | 0.04     | 0.1736  | 0.0027   | 0.79422 | 1044              | 15       | 1032                | 15       | 1099                | 29       | 1032             | 15       | 1.149425       |  |
| 13PRUC_23.FIN2 | 63.4    | 1.156  | 2.885   | 0.048    | 0.2122  | 0.0028   | 0.97294 | 1377              | 13       | 1240                | 15       | 1605                | 21       | 1605             | 21       | 22.74143       |  |
| 13PRUC_24.FIN2 | 224.1   | 1.085  | 4.14    | 0.045    | 0.2727  | 0.0036   | 0.96778 | 1661.9            | 9        | 1554                | 18       | 1805                | 10       | 1805             | 10       | 13.90582       |  |
| 13PRUC_25.FIN2 | 756     | 2.53   | 0.58    | 0.017    | 0.0575  | 0.0018   | 0.99992 | 464               | 11       | 361                 | 11       | 996                 | 35       | 361              | 11       | 22.19828       |  |
| 13PRUC_25.FIN2 | 110.7   | 0.839  | 4.004   | 0.091    | 0.2833  | 0.005    | 0.92501 | 1634              | 18       | 1608                | 25       | 1641                | 16       | 1641             | 16       | 2.010969       |  |
| 13PRUC_26.FIN2 | 67.5    | 0.795  | 1.863   | 0.022    | 0.1827  | 0.0019   | 0.8698  | 1067.4            | 7.9      | 1081                | 10       | 1045                | 12       | 1081             | 10       | 1.274124       |  |
| 13PRUC_27.FIN2 | 506     | 105.2  | 0.4973  | 0.005    | 0.06615 | 0.00052  | 0.61378 | 409.8             | 3.4      | 412.9               | 3.2      | 419                 | 14       | 412.9            | 3.2      | 0.756467       |  |
| 13PRUC_28.FIN2 | 305     | 3.623  | 2.216   | 0.023    | 0.2062  | 0.002    | 0.87425 | 1186.6            | 7.1      | 1208                | 11       | 1160.5              | 8.7      | 1160.5           | 11       | 1.803472       |  |
| 13PRUC_29.FIN2 | 111     | 0.93   | 4.769   | 0.039    | 0.3215  | 0.0031   | 0.87631 | 1779.1            | 6.8      | 1797                | 15       | 1770.5              | 9.8      | 1770.5           | 9.8      | 1.496752       |  |
| 13PRUC_30.FIN2 | 103.1   | 0.901  | 1.961   | 0.02     | 0.1887  | 0.0016   | 0.79939 | 1102.6            | 7        | 1114.1              | 8.5      | 1086                | 12       | 1114.1           | 8.5      | 1.042989       |  |
| 13PRUC_31.FIN2 | 48.6    | 1.152  | 2.593   | 0.041    | 0.226   | 0.0033   | 0.87846 | 1298              | 12       | 1313                | 17       | 1299                | 21       | 1299             | 21       | 1.077752       |  |
| 13PRUC_32.FIN2 | 136     | 2.11   | 4.196   | 0.041    | 0.3058  | 0.0026   | 0.87611 | 1672.6            | 8        | 1720                | 13       | 1627.2              | 8.3      | 1627.2           | 8.3      | 5.703048       |  |
| 13PRUC_33.FIN2 | 130.1   | 1.132  | 2.098   | 0.016    | 0.1973  | 0.0016   | 0.72333 | 1148.6            | 5.2      | 1160.9              | 8.7      | 1134                | 13       | 1160.9           | 8.7      | 1.070869       |  |
| 13PRUC_34.FIN2 | 292     | 0.936  | 1.837   | 0.012    | 0.1804  | 0.0012   | 0.78543 | 1058.8            | 4.4      | 1069.3              | 6.4      | 1040.7              | 6.8      | 1069.3           | 6.4      | 0.991689       |  |
| 13PRUC_35.FIN2 | 64.3    | 1.697  | 2.444   | 0.03     | 0.2198  | 0.0019   | 0.83171 | 1256.2            | 9.1      | 1281                | 10       | 1215                | 13       | 1215             | 13       | 5.432099       |  |
| 13PRUC_36.FIN2 | 102     | 1.587  | 3.255   | 0.03     | 0.2599  | 0.0018   | 0.70381 | 1470              | 7        | 1489.4              | 9        | 1464                | 8.8      | 1464             | 8.8      | 1.734973       |  |
| 13PRUC_37.FIN2 | 87.5    | 1.118  | 2.26    | 0.021    | 0.21    | 0.0016   | 0.78908 | 1199.6            | 6.4      | 1228.8              | 8.8      | 1162                | 14       | 1162             | 8.8      | 2.434145       |  |
| 13PRUC_38.FIN2 | 135     | 1.008  | 1.576   | 0.016    | 0.1641  | 0.0014   | 0.76196 | 961.4             | 6.3      | 980.7               | 7.7      | 926                 | 11       | 980.7            | 7.7      | 2.007489       |  |
| 13PRUC_39.FIN2 | 227     | 1.18   | 1.77    | 0.022    | 0.1776  | 0.0018   | 0.81832 | 1034.9            | 8        | 1053.8              | 9.6      | 1010                | 13       | 1053.8           | 9.6      | 1.826263       |  |
| 13PRUC_40.FIN2 | 188.5   | 0.893  | 4.594   | 0.05     | 0.3055  | 0.0033   | 0.85491 | 1747.7            | 9        | 1718                | 16       | 1787                | 7.1      | 1787             | 7.1      | 3.86122        |  |
| 13PRUC_41.FIN2 | 61.2    | 0.8085 | 13.86   | 0.13     | 0.5453  | 0.005    | 0.96631 | 2742.2            | 8.5      | 2805                | 21       | 2709.4              | 8.8      | 2709.4           | 8.8      | 3.528456       |  |
| 13PRUC_42.FIN2 | 74.5    | 1.009  | 1.998   | 0.029    | 0.192   | 0.0017   | 0.918   | 1116              | 9.1      | 1132.2              | 9.3      | 1091                | 17       | 1132.2           | 9.3      | 1.451613       |  |
| 13PRUC_43.FIN2 | 204     | 1.663  | 4.824   | 0.026    | 0.3258  | 0.002    | 0.75007 | 1789              | 4.6      | 1818.9              | 9.8      | 1756.4              | 5.8      | 1756.4           | 5.8      | 3.558415       |  |
| 13PRUC_44.FIN2 | 68.4    | 1.169  | 6.405   | 0.042    | 0.3806  | 0.0031   | 0.88057 | 2032.7            | 5.7      | 2079                | 14       | 2002.7              | 8.6      | 2002.7           | 8.6      | 3.809857       |  |
| 13PRUC_45.FIN2 | 349.7   | 1.503  | 2.276   | 0.015    | 0.2068  | 0.0017   | 0.40449 | 1204.7            | 4.6      | 1211.6              | 8.8      | 1191.9              | 7.6      | 1191.9           | 8.8      | 0.572757       |  |
| 13PRUC_46.FIN2 | 46.6    | 0.752  | 0.711   | 0.019    | 0.0896  | 0.0013   | 0.95995 | 544               | 11       | 553.1               | 7.5      | 530                 | 32       | 553.1            | 7.5      | 1.672794       |  |
| 13PRUC_48.FIN2 | 17.92   | 1.412  | 1.977   | 0.043    | 0.1878  | 0.0033   | 0.93714 | 1106              | 15       | 1109                | 18       | 1120                | 33       | 1109             | 18       | 0.271248       |  |
| 13PRUC_49.FIN2 | 217     | 0.625  | 0.5434  | 0.0062   | 0.0712  | 0.00076  | 0.75118 | 440.5             | 4.1      | 443.4               | 4.6      | 430                 | 15       | 443.4            | 4.6      | 0.658343       |  |
| 13PRUC_50.FIN2 | 229     | 13.51  | 1.713   | 0.016    | 0.1703  | 0.0015   | 0.78189 | 1013.1            | 5.8      | 1013.7              | 8.4      | 997.2               | 9.3      | 1013.7           | 8.4      | 0.059224       |  |
| 13PRUC_51.FIN2 | 7.48    | 0.69   | 2.397   | 0.08     | 0.2048  | 0.0062   | 0.98104 | 1240              | 25       | 1207                | 33       | 1320                | 33       | 1320             | 33       | 8.560606       |  |
| 13PRUC_52.FIN2 | 83.6    | 1.336  | 1.375   | 0.035    | 0.1293  | 0.0034   | 0.98389 | 876               | 15       | 783                 | 19       | 1124                | 19       | 783              | 19       | 10.61644       |  |
| 13PRUC_53.FIN2 | 24.27   | 1.367  | 2.423   | 0.039    | 0.2174  | 0.0032   | 0.92313 | 1250              | 12       | 1268                | 17       | 1250                | 19       | 1250             | 19       | 1.44           |  |
| 13PRUC_54.FIN2 | 130.6   | 2.08   | 4.815   | 0.043    | 0.3264  | 0.0026   | 0.87775 | 1791.7            | 7.5      | 1821                | 13       | 1736.1              | 9        | 1736.1           | 9        | 4.890271       |  |
| 13PRUC_55.FIN2 | 163     | 2.05   | 3.196   | 0.044    | 0.2523  | 0.0033   | 0.93573 | 1456              | 11       | 1450                | 17       | 1467                | 13       | 1467             | 13       | 1.158828       |  |
| 13PRUC_56.FIN2 | 68.8    | 0.116  | 1.024   | 0.017    | 0.1141  | 0.0012   | 0.84725 | 715.4             | 8.4      | 696.4               | 7.2      | 787                 | 29       | 696.4            | 7.2      | 2.655857       |  |
| 13PRUC_57.FIN2 | 83.9    | 1.47   | 2.149   | 0.018    | 0.201   | 0.0018   | 0.93446 | 1164.3            | 5.9      | 1180.4              | 9.6      | 1133                | 10       | 1180.4           | 9.6      | 1.382805       |  |
| 13PRUC_58.FIN2 | 144.5   | 2.278  | 4.769   | 0.034    | 0.3266  | 0.0027   | 0.89442 | 1779.1            | 6        | 1822                | 13       | 1746                | 10       | 1746             | 10       | 4.352806       |  |
| 13PRUC_59.FIN2 | 20.58   | 2.162  | 4.854   | 0.082    | 0.3265  | 0.0037   | 0.95384 | 1794              | 14       | 1824                | 19       | 1758                | 18       | 1758             | 18       | 3.754266       |  |
| 13PRUC_60.FIN2 | 93.6    | 1.033  | 5.424   | 0.051    | 0.345   | 0.003    | 0.88363 | 1888              | 8.1      | 1910                | 14       | 1870.1              | 6.7      | 1870.1           | 6.7      | 2.133576       |  |
| 13PRUC_61.FIN2 | 153.8   | 2.268  | 2.085   | 0.024    | 0.1952  | 0.0019   | 0.85211 | 1144.4            | 7.7      | 1149                | 10       | 1139                | 13       | 1149             | 10       | 0.401957       |  |
| 13PRUC_62.FIN2 | 46.57   | 0.942  | 4.65    | 0.044    | 0.3133  | 0.0029   | 0.88833 | 1758.8            | 7.8      | 1757                | 14       | 1756                | 11       | 1756             | 11       | 0.056948       |  |
| 13PRUC_63.FIN2 | 60.7    | 0.863  | 3.097   | 0.037    | 0.2464  | 0.0019   | 0.83434 | 1431.3            | 9.1      | 1420                | 9.9      | 1448                | 15       | 1448             | 15       | 1.933702       |  |
| 13PRUC_64.FIN2 | 62      | 0.839  | 5.178   | 0.07     | 0.3307  | 0.0033   | 0.84968 | 1848              | 11       | 1841                | 16       | 1861                | 12       | 1861             | 12       | 1.074691       |  |
| 13PRUC_65.FIN2 | 182     | 1.045  | 3.363   | 0.039    | 0.263   | 0.0031   | 0.90891 | 1496.5            | 9        | 1505                | 16       | 1492.3              | 8.3      | 1492.3           | 8.3      | 0.851035       |  |
| 13PRUC_66.FIN2 | 284     | 1.66   | 0.518   | 0.015    | 0.0655  | 0.0019   | 0.97578 | 423               | 11       | 409                 |          |                     |          |                  |          |                |  |

|                 |       |        |        |        |         |         |         |        |     |        |     |        |     |        |     |          |
|-----------------|-------|--------|--------|--------|---------|---------|---------|--------|-----|--------|-----|--------|-----|--------|-----|----------|
| 13PRUC_80.FIN2  | 32.2  | 0.5454 | 5      | 0.068  | 0.3175  | 0.0036  | 0.94407 | 1820   | 11  | 1777   | 18  | 1859   | 11  | 1859   | 11  | 4.410974 |
| 13PRUC_81.FIN2  | 28.43 | 0.692  | 2.455  | 0.035  | 0.2165  | 0.0025  | 0.8858  | 1258   | 10  | 1263   | 14  | 1265   | 18  | 1265   | 18  | 0.158103 |
| 13PRUC_82.FIN2  | 26.59 | 1.344  | 18.91  | 0.17   | 0.6066  | 0.0059  | 0.96746 | 3036.3 | 8.6 | 3055   | 24  | 3031.4 | 8.1 | 3031.4 | 8.1 | 0.778518 |
| 13PRUC_83.FIN2  | 127   | 0.301  | 2.62   | 0.058  | 0.2226  | 0.0027  | 0.93762 | 1300   | 13  | 1295   | 14  | 1338   | 17  | 1338   | 17  | 3.213752 |
| 13PRUC_84.FIN2  | 11.55 | 1.108  | 3.14   | 0.1    | 0.2411  | 0.0059  | 0.97109 | 1438   | 26  | 1391   | 31  | 1515   | 38  | 1515   | 38  | 8.184818 |
| 13PRUC_85.FIN2  | 232   | 2.4    | 0.5516 | 0.0069 | 0.07126 | 0.00056 | 0.57833 | 446.4  | 4.6 | 443.7  | 3.4 | 464    | 20  | 443.7  | 3.4 | 0.604839 |
| 13PRUC_86.FIN2  | 90.7  | 0.7618 | 0.873  | 0.018  | 0.1014  | 0.001   | 0.82865 | 636.3  | 9.9 | 622.6  | 5.9 | 727    | 42  | 622.6  | 5.9 | 2.153072 |
| 13PRUC_87.FIN2  | 288   | 2.022  | 5.616  | 0.053  | 0.3533  | 0.0031  | 0.98653 | 1914   | 12  | 1950   | 15  | 1885.3 | 6.1 | 1885.3 | 6.1 | 3.431815 |
| 13PRUC_88.FIN2  | 102.6 | 1.705  | 2.761  | 0.031  | 0.2322  | 0.0025  | 0.89279 | 1345.6 | 8.2 | 1346   | 13  | 1352   | 12  | 1352   | 12  | 0.443787 |
| 13PRUC_89.FIN2  | 19.3  | 0.763  | 1.832  | 0.049  | 0.1778  | 0.0025  | 0.95659 | 1054   | 18  | 1055   | 14  | 1059   | 30  | 1055   | 14  | 0.094877 |
| 13PRUC_90.FIN2  | 229   | 1.89   | 1.918  | 0.022  | 0.1828  | 0.0014  | 0.71915 | 1086.9 | 7.6 | 1082.4 | 7.8 | 1109   | 12  | 1082.4 | 7.8 | 0.414022 |
| 13PRUC_91.FIN2  | 36.3  | 0.853  | 4.791  | 0.074  | 0.3219  | 0.0036  | 0.97893 | 1782   | 14  | 1799   | 17  | 1783   | 13  | 1783   | 13  | 0.897364 |
| 13PRUC_92.FIN2  | 201   | 6.02   | 7.013  | 0.058  | 0.3921  | 0.0034  | 0.88528 | 2112.6 | 7.3 | 2132   | 16  | 2098.3 | 7   | 2098.3 | 7   | 1.606062 |
| 13PRUC_93.FIN2  | 125.1 | 2.9    | 4.915  | 0.065  | 0.3242  | 0.0037  | 0.92906 | 1804   | 11  | 1810   | 18  | 1797.2 | 9   | 1797.2 | 9   | 0.712219 |
| 13PRUC_94.FIN2  | 160.5 | 0.6758 | 5.469  | 0.042  | 0.3438  | 0.0028  | 0.89154 | 1895.4 | 6.7 | 1905   | 13  | 1890   | 6   | 1890   | 6   | 0.793651 |
| 13PRUC_95.FIN2  | 1277  | 6.99   | 2.33   | 0.03   | 0.1979  | 0.0028  | 0.85934 | 1221.3 | 9.1 | 1164   | 15  | 1337.8 | 8.2 | 1164   | 15  | 4.691722 |
| 13PRUC_95.FIN2  | 739   | 3.66   | 3.011  | 0.02   | 0.2471  | 0.0018  | 0.50881 | 1410.3 | 5   | 1423.7 | 9.3 | 1402.8 | 9.9 | 1402.8 | 9.9 | 1.489877 |
| 13PRUC_96.FIN2  | 98.7  | 1.136  | 2.12   | 0.021  | 0.1959  | 0.0018  | 0.75666 | 1155   | 6.7 | 1153   | 9.8 | 1167   | 13  | 1153   | 9.8 | 0.17316  |
| 13PRUC_97.FIN2  | 37.5  | 0.6576 | 12.62  | 0.18   | 0.5066  | 0.009   | 0.96413 | 2651   | 14  | 2641   | 38  | 2665   | 19  | 2665   | 19  | 0.900563 |
| 13PRUC_98.FIN2  | 166.4 | 1.337  | 3.914  | 0.03   | 0.2833  | 0.0021  | 0.75198 | 1617   | 6.1 | 1608   | 11  | 1647.4 | 6.6 | 1647.4 | 6.6 | 2.391647 |
| 13PRUC_99.FIN2  | 69.4  | 0.605  | 1.935  | 0.025  | 0.1882  | 0.0021  | 0.83265 | 1092.4 | 8.7 | 1111   | 12  | 1075   | 16  | 1111   | 12  | 1.702673 |
| 13PRUC_100.FIN2 | 214   | 3.35   | 6.017  | 0.056  | 0.3643  | 0.0031  | 0.89669 | 1977.7 | 8.1 | 2002   | 15  | 1969.5 | 7.4 | 1969.5 | 7.4 | 1.650165 |
| 13PRUC_101.FIN2 | 132   | 1.432  | 11.838 | 0.087  | 0.5116  | 0.0038  | 0.95663 | 2591.2 | 6.9 | 2663   | 16  | 2562.6 | 6.4 | 2562.6 | 6.4 | 3.917896 |
| 13PRUC_102.FIN2 | 108.4 | 1.625  | 22.83  | 0.27   | 0.6211  | 0.0075  | 0.98773 | 3219   | 12  | 3113   | 30  | 3299.5 | 7.9 | 3299.5 | 7.9 | 5.652372 |
| 13PRUC_103.FIN2 | 267   | 2.67   | 5.149  | 0.047  | 0.3308  | 0.0034  | 0.97482 | 1841.2 | 9.1 | 1842   | 17  | 1869   | 11  | 1869   | 11  | 1.444623 |
| 13PRUC_104.FIN2 | 82.3  | 1.576  | 1.912  | 0.026  | 0.188   | 0.002   | 0.84928 | 1084.6 | 9   | 1110   | 11  | 1068   | 14  | 1110   | 11  | 2.341877 |
| 13PRUC_105.FIN2 | 52.8  | 1.09   | 4.566  | 0.045  | 0.3144  | 0.0027  | 0.82875 | 1742.5 | 8.1 | 1762   | 13  | 1730   | 10  | 1730   | 10  | 1.849711 |
| 13PRUC_106.FIN2 | 17.1  | 1.74   | 1.96   | 0.11   | 0.1775  | 0.0091  | 0.98558 | 1097   | 37  | 1052   | 50  | 1217   | 41  | 1052   | 50  | 4.102097 |
| 13PRUC_106.FIN2 | 80.5  | 1.165  | 2.468  | 0.038  | 0.2237  | 0.0023  | 0.91366 | 1262   | 11  | 1301   | 12  | 1215   | 17  | 1215   | 17  | 7.078189 |
| 13PRUC_107.FIN2 | 65.7  | 0.955  | 14.26  | 0.15   | 0.5482  | 0.0058  | 0.98206 | 2766   | 10  | 2817   | 24  | 2747.7 | 6.3 | 2747.7 | 6.3 | 2.522109 |
| 13PRUC_108.FIN2 | 71.2  | 2.061  | 4.451  | 0.039  | 0.307   | 0.003   | 0.88059 | 1721.4 | 7.4 | 1725   | 15  | 1743   | 12  | 1743   | 12  | 1.032702 |
| 13PRUC_109.FIN2 | 376   | 3.133  | 12.602 | 0.077  | 0.5035  | 0.0032  | 0.87482 | 2650.1 | 5.7 | 2629   | 14  | 2681.9 | 4.5 | 2681.9 | 4.5 | 1.972482 |
| 13PRUC_110.FIN2 | 153.8 | 0.771  | 3.964  | 0.038  | 0.2845  | 0.0026  | 0.87851 | 1626.3 | 7.8 | 1614   | 13  | 1657   | 8.7 | 1657   | 8.7 | 2.595051 |
| 13PRUC_111.FIN2 | 91.2  | 0.978  | 0.4647 | 0.0089 | 0.05911 | 0.00081 | 0.88088 | 387.2  | 6.2 | 370.2  | 4.9 | 524    | 35  | 370.2  | 4.9 | 4.390496 |
| 13PRUC_112.FIN2 | 93    | 2.22   | 2.606  | 0.037  | 0.2185  | 0.0026  | 0.88789 | 1301   | 10  | 1274   | 14  | 1352   | 15  | 1352   | 15  | 5.769231 |
| 13PRUC_113.FIN2 | 33.2  | 0.4274 | 12.1   | 0.18   | 0.514   | 0.0059  | 0.94172 | 2613   | 14  | 2673   | 25  | 2577   | 16  | 2577   | 16  | 3.725262 |
| 13PRUC_114.FIN2 | 104.9 | 0.978  | 2.781  | 0.039  | 0.222   | 0.0022  | 0.86235 | 1350   | 10  | 1292   | 12  | 1440   | 17  | 1440   | 17  | 10.27778 |
| 13PRUC_115.FIN2 | 180   | 2.523  | 4.43   | 0.038  | 0.2967  | 0.0027  | 0.93551 | 1707.2 | 7   | 1675   | 13  | 1745   | 7.6 | 1745   | 7.6 | 4.011461 |
| 13PRUC_116.FIN2 | 156.1 | 1.317  | 2.093  | 0.015  | 0.1933  | 0.0013  | 0.66107 | 1146.2 | 4.9 | 1139.4 | 7.1 | 1168   | 11  | 1139.4 | 7.1 | 0.593265 |
| 13PRUC_117.FIN2 | 204   | 1.0347 | 0.685  | 0.012  | 0.08452 | 0.00087 | 0.72252 | 529.4  | 7.4 | 523    | 5.2 | 554    | 23  | 523    | 5.2 | 1.208916 |
| 13PRUC_118.FIN2 | 97    | 1.65   | 5.96   | 0.11   | 0.359   | 0.004   | 0.95387 | 1968   | 16  | 1977   | 19  | 1965   | 14  | 1965   | 14  | 0.610687 |
| 13PRUC_119.FIN2 | 67.2  | 0.896  | 2.082  | 0.037  | 0.1806  | 0.0027  | 0.95705 | 1143   | 12  | 1070   | 15  | 1276   | 30  | 1070   | 15  | 6.386702 |
| 13PRUC_120.FIN2 | 80    | 0.968  | 1.937  | 0.031  | 0.186   | 0.0022  | 0.87082 | 1093   | 11  | 1099   | 12  | 1089   | 14  | 1099   | 12  | 0.548948 |

|                 |       |        |        |        |         |         |          |        |     |        |     |        |     |        |      |          |
|-----------------|-------|--------|--------|--------|---------|---------|----------|--------|-----|--------|-----|--------|-----|--------|------|----------|
| 11UPR01_1.FIN2  | 140   | 0.83   | 0.54   | 0.015  | 0.06773 | 0.00094 | 0.33257  | 437.7  | 9.6 | 423.1  | 5.8 | 496    | 36  | 423.1  | 5.8  | 3.335618 |
| 11UPR01_2.FIN2  | 203.7 | 2.18   | 2.74   | 0.2    | 0.181   | 0.013   | 0.96135  | 1320   | 57  | 1063   | 72  | 1820   | 15  | 1063   | 72   | 19.4697  |
| 11UPR01_3.FIN2  | 123   | 1.599  | 4.216  | 0.04   | 0.2975  | 0.0028  | 0.85237  | 1676.5 | 7.8 | 1679   | 14  | 1667   | 10  | 1667   | 10   | 0.719856 |
| 11UPR01_4.FIN2  | 95.7  | 1.497  | 2.291  | 0.034  | 0.2023  | 0.0026  | 0.39477  | 1210   | 10  | 1187   | 14  | 1247   | 13  | 1187   | 14   | 1.900826 |
| 11UPR01_5.FIN2  | 541   | 1.387  | 0.0919 | 0.0022 | 0.01375 | 0.00025 | 0.62432  | 89.2   | 2   | 88.1   | 1.6 | 156    | 24  | 88.1   | 1.6  | 1.233184 |
| 11UPR01_6.FIN2  | 176.8 | 1.379  | 4.115  | 0.027  | 0.295   | 0.0018  | 0.50322  | 1657.7 | 5.4 | 1666.4 | 8.8 | 1646.7 | 6.5 | 1646.7 | 6.5  | 1.196332 |
| 11UPR01_7.FIN2  | 144   | 0.813  | 1.62   | 0.12   | 0.128   | 0.011   | 0.85146  | 955    | 47  | 768    | 64  | 1496   | 44  | 768    | 64   | 19.58115 |
| 11UPR01_8.FIN2  | 105.1 | 0.83   | 3.991  | 0.029  | 0.2872  | 0.0019  | 0.60077  | 1632   | 5.9 | 1627.3 | 9.7 | 1641.8 | 6.5 | 1641.8 | 6.5  | 0.883177 |
| 11UPR01_9.FIN2  | 222   | 3.186  | 4.363  | 0.036  | 0.2971  | 0.0027  | 0.66432  | 1705.1 | 6.8 | 1677   | 13  | 1720.8 | 9   | 1720.8 | 9    | 2.545328 |
| 11UPR01_10.FIN2 | 61.3  | 0.965  | 4.15   | 0.057  | 0.2918  | 0.005   | 0.54516  | 1663   | 11  | 1654   | 24  | 1674   | 14  | 1674   | 14   | 1.194743 |
| 11UPR01_11.FIN2 | 101.6 | 0.7938 | 3.328  | 0.03   | 0.2595  | 0.0024  | 0.63058  | 1487.4 | 7.1 | 1487   | 12  | 1488.5 | 8.8 | 1488.5 | 8.8  | 0.100773 |
| 11UPR01_12.FIN2 | 137.6 | 0.998  | 3.078  | 0.046  | 0.2411  | 0.0032  | 0.74904  | 1426   | 11  | 1392   | 17  | 1474   | 11  | 1474   | 11   | 5.563094 |
| 11UPR01_13.FIN2 | 80.8  | 1.143  | 3.105  | 0.035  | 0.2419  | 0.0024  | 0.42296  | 1433.3 | 8.6 | 1397   | 12  | 1483   | 13  | 1483   | 13   | 5.799056 |
| 11UPR01_14.FIN2 | 332   | 1.001  | 0.5647 | 0.0074 | 0.0718  | 0.00083 | 0.66772  | 454.4  | 4.8 | 447    | 5   | 480    | 16  | 447    | 5    | 1.628521 |
| 11UPR01_15.FIN2 | 38.8  | 0.609  | 7.54   | 0.09   | 0.3923  | 0.0049  | 0.73468  | 2177   | 11  | 2133   | 23  | 2199   | 11  | 2199   | 11   | 3.001364 |
| 11UPR01_16.FIN2 | 144.7 | 1.515  | 2.396  | 0.023  | 0.211   | 0.0026  | 0.54321  | 1241.9 | 6.7 | 1234   | 14  | 1258   | 14  | 1258   | 14   | 1.90779  |
| 11UPR01_17.FIN2 | 166   | 1.468  | 0.3849 | 0.0062 | 0.05254 | 0.00056 | 0.16259  | 330.4  | 4.5 | 330.1  | 3.5 | 324    | 22  | 330.1  | 3.5  | 0.090799 |
| 11UPR01_18.FIN2 | 132.3 | 1.98   | 2.874  | 0.04   | 0.2346  | 0.0034  | 0.56016  | 1374   | 11  | 1361   | 17  | 1400   | 17  | 1400   | 17   | 2.785714 |
| 11UPR01_19.FIN2 | 311   | 1.66   | 0.1488 | 0.0088 | 0.01509 | 0.00031 | 0.50498  | 140.3  | 7.7 | 96.5   | 2   | 1021   | 99  | DISC   | DISC | 31.21882 |
| 11UPR01_20.FIN2 | 241   | 3.67   | 1.124  | 0.016  | 0.1226  | 0.0017  | 0.54708  | 764.8  | 7.7 | 745.6  | 9.9 | 822    | 17  | 745.6  | 9.9  | 2.51046  |
| 11UPR01_21.FIN2 | 54.3  | 0.565  | 3.225  | 0.037  | 0.2539  | 0.0025  | 0.32668  | 1487.4 | 8.9 | 1458   | 13  | 1528   | 14  | 1528   | 14   | 4.581152 |
| 11UPR01_22.FIN2 | 309   | 1.43   | 2.978  | 0.04   | 0.2426  | 0.0027  | 0.92293  | 1398   | 12  | 1400   | 14  | 1399   | 15  | 1399   | 15   | 0.07148  |
| 11UPR01_23.FIN2 | 2.12  | 0.0106 | 1.5    | 0.14   | 0.0912  | 0.0059  | 0.21138  | 928    | 54  | 561    | 35  | 2020   | 120 | DISC   | DISC | 39.54741 |
| 11UPR01_24.FIN2 | 61.2  | 1.463  | 2.999  | 0.039  | 0.2367  | 0.0026  | 0.47498  | 1408.9 | 9.7 | 1369   | 14  | 1475   | 15  | 1475   | 15   | 7.186441 |
| 11UPR01_25.FIN2 | 42.1  | 2.298  | 1.896  | 0.033  | 0.1728  | 0.0027  | 0.34131  | 1079   | 12  | 1029   | 15  | 1177   | 20  | 1029   | 15   | 4.63392  |
| 11UPR01_26.FIN2 | 82.5  | 1.164  | 3.324  | 0.038  | 0.2576  | 0.0024  | 0.76432  | 1485.9 | 9   | 1477   | 12  | 1509   | 11  | 1509   | 11   | 2.12061  |
| 11UPR01_27.FIN2 | 69.5  | 1.018  | 1.988  | 0.038  | 0.1829  | 0.0034  | 0.74937  | 1111   | 13  | 1083   | 18  | 1161   | 12  | 1083   | 18   | 2.520252 |
| 11UPR01_28.FIN2 | 278.5 | 1.52   | 0.497  | 0.0064 | 0.06522 | 0.00055 | 0.35125  | 409.5  | 4.3 | 407.3  | 3.4 | 427    | 18  | 407.3  | 3.4  | 0.537241 |
| 11UPR01_29.FIN2 | 363   | 1.993  | 2.5    | 0.11   | 0.1817  | 0.0076  | 0.9823   | 1261   | 34  | 1074   | 42  | 1602.2 | 8.9 | 1074   | 42   | 14.8295  |
| 11UPR01_30.FIN2 | 118.5 | 1.884  | 2.081  | 0.02   | 0.1925  | 0.0019  | 0.49269  | 1142   | 6.5 | 1135   | 10  | 1158   | 9.9 | 1135   | 10   | 0.61296  |
| 11UPR01_31.FIN2 | 268.6 | 1.465  | 1.7321 | 0.0099 | 0.17    | 0.0011  | 0.32622  | 1020.4 | 3.7 | 1012.2 | 5.9 | 1033.7 | 8.2 | 1012.2 | 5.9  | 0.803606 |
| 11UPR01_32.FIN2 | 194   | 1.88   | 2.345  | 0.023  | 0.2074  | 0.0019  | 0.9213   | 1225.7 | 7.1 | 1215   | 10  | 1247.5 | 7.2 | 1247.5 | 7.2  | 2.60521  |
| 11UPR01_33.FIN2 | 91    | 1.443  | 1.74   | 0.019  | 0.1711  | 0.0015  | 0.35801  | 1023   | 7   | 1018   | 8.5 | 1042   | 12  | 1018   | 8.5  | 0.488759 |
| 11UPR01_34.FIN2 | 56.6  | 1.573  | 2.128  | 0.035  | 0.1923  | 0.0027  | 0.86495  | 1157   | 11  | 1133   | 14  | 1199   | 13  | 1133   | 14   | 2.07433  |
| 11UPR01_35.FIN2 | 54.1  | 0.92   | 1.773  | 0.029  | 0.1756  | 0.0021  | 0.78988  | 1034   | 11  | 1043   | 12  | 1033   | 12  | 1043   | 12   | 0.870406 |
| 11UPR01_36.FIN2 | 75.5  | 1.406  | 13.14  | 0.23   | 0.4988  | 0.0093  | 0.96001  | 2687   | 18  | 2606   | 41  | 2738.9 | 7.4 | 2738.9 | 7.4  | 4.852313 |
| 11UPR01_37.FIN2 | 194   | 1.884  | 3.7    | 0.1    | 0.2298  | 0.0061  | 0.9548   | 1569   | 22  | 1332   | 32  | 1911.3 | 8.5 | DISC   | DISC | 30.30921 |
| 11UPR01_38.FIN2 | 126.8 | 0.705  | 0.706  | 0.015  | 0.0867  | 0.0012  | 0.052314 | 539.6  | 7.9 | 535.9  | 7   | 573    | 35  | 535.9  | 7    | 0.685693 |
| 11UPR01_39.FIN2 | 217.9 | 1.313  | 4.319  | 0.035  | 0.2919  | 0.003   | 0.77162  | 1696.6 | 6.8 | 1653   | 15  | 1745.1 | 6.8 | 1745.1 | 6.8  | 5.277635 |
| 11UPR01_40.FIN2 | 261.7 | 0.696  | 0.587  | 0.013  | 0.0686  | 0.0014  | 0.48879  | 468.8  | 8.3 | 429.5  | 8   | 691    | 29  | 429.5  | 8    | 8.383106 |
| 11UPR01_41.FIN2 | 455   | 1.92   | 2.644  | 0.049  | 0.1939  | 0.0028  | 0.84025  | 1311   | 14  | 1142   | 15  | 1614   | 18  | 1142   | 15   | 12.89092 |
| 11UPR01_42.FIN2 | 453   | 0.59   | 1.45   | 0.018  | 0.1492  | 0.0017  | 0.72729  | 911.8  | 7.5 | 896.4  | 9.3 | 936    | 13  | 896.4  | 9.3  | 1.688967 |
| 11UPR01_43.FIN2 | 149.7 | 1.247  | 0.1663 | 0.0043 | 0.0248  | 0.00034 | 0.15765  | 156    | 3.8 | 158.2  | 2.2 | 181    | 27  | 158.2  | 2.2  | 1.410256 |
| 11UPR01_44.FIN2 | 219.2 | 2.27   | 3.771  | 0.042  | 0.3178  | 0.0028  | 0.8099   | 1779.4 | 7.3 | 1776   | 14  | 1781.4 | 5.1 | 1781.4 | 5.1  | 0.190861 |
| 11UPR01_45.FIN2 | 185   | 0.993  | 4.475  | 0.047  | 0.2548  | 0.0043  | 0.40852  | 1520   | 11  | 1466   | 21  | 1600   | 40  | 1600   | 40   | 8.37     |

|                  |       |        |        |        |         |         |         |        |     |        |     |        |     |        |      |          |
|------------------|-------|--------|--------|--------|---------|---------|---------|--------|-----|--------|-----|--------|-----|--------|------|----------|
| 11UPR01_46.FIN2  | 69.7  | 0.5908 | 0.837  | 0.012  | 0.1001  | 0.0011  | 0.27073 | 617.1  | 6.6 | 615.1  | 6.3 | 643    | 22  | 615.1  | 6.3  | 0.324097 |
| 11UPR01_47.FIN2  | 92    | 1.446  | 3.342  | 0.046  | 0.2492  | 0.0025  | 0.62523 | 1490   | 11  | 1434   | 13  | 1573   | 10  | 1573   | 10   | 8.836618 |
| 11UPR01_48.FIN2  | 102   | 1.042  | 2.271  | 0.041  | 0.2027  | 0.0027  | 0.88805 | 1202   | 13  | 1190   | 14  | 1230   | 11  | 1190   | 14   | 0.998336 |
| 11UPR01_49.FIN2  | 490   | 7.37   | 0.5312 | 0.0057 | 0.0691  | 0.00063 | 0.45782 | 432.5  | 3.8 | 430.7  | 3.8 | 440    | 14  | 430.7  | 3.8  | 0.416185 |
| 11UPR01_50.FIN2  | 72.1  | 0.503  | 4.927  | 0.072  | 0.3134  | 0.0041  | 0.88481 | 1807   | 12  | 1757   | 20  | 1860.9 | 7.6 | 1860.9 | 7.6  | 5.58332  |
| 11UPR01_51.FIN2  | 93.9  | 1.008  | 3.994  | 0.034  | 0.283   | 0.0032  | 0.62294 | 1632.7 | 6.9 | 1606   | 16  | 1681   | 10  | 1681   | 10   | 4.46163  |
| 11UPR01_52.FIN2  | 262   | 0.82   | 0.835  | 0.016  | 0.1006  | 0.0017  | 0.98146 | 615.7  | 9.4 | 618    | 10  | 615    | 10  | 618    | 10   | 0.373559 |
| 11UPR01_53.FIN2  | 111   | 0.86   | 1.89   | 0.16   | 0.156   | 0.012   | 0.97688 | 1049   | 54  | 929    | 68  | 1361   | 16  | 929    | 68   | 11.43947 |
| 11UPR01_54.FIN2  | 78.6  | 1.315  | 2.343  | 0.027  | 0.2069  | 0.0017  | 0.53856 | 1225.8 | 8   | 1212.2 | 9.3 | 1254.3 | 9.9 | 1254.3 | 9.9  | 3.356454 |
| 11UPR01_55.FIN2  | 127   | 1.36   | 3.902  | 0.046  | 0.2801  | 0.003   | 0.81356 | 1613.2 | 9.6 | 1592   | 15  | 1636   | 11  | 1636   | 11   | 2.689487 |
| 11UPR01_56.FIN2  | 145   | 0.961  | 1.932  | 0.023  | 0.1827  | 0.0022  | 0.46475 | 1092.4 | 8.1 | 1081   | 12  | 1098   | 14  | 1081   | 12   | 1.043574 |
| 11UPR01_57.FIN2  | 122   | 1.796  | 2.404  | 0.025  | 0.2088  | 0.0021  | 0.55376 | 1243.3 | 7.5 | 1222   | 11  | 1277   | 11  | 1277   | 11   | 4.306969 |
| 11UPR01_58.FIN2  | 490   | 4.45   | 3.811  | 0.038  | 0.2581  | 0.0026  | 0.84097 | 1594.5 | 8   | 1480   | 13  | 1755.4 | 4.8 | 1755.4 | 4.8  | 15.68873 |
| 11UPR01_59.FIN2  | 91.6  | 0.873  | 8.26   | 0.11   | 0.3549  | 0.0042  | 0.83293 | 2259   | 12  | 1964   | 20  | 2538.6 | 8.8 | 2538.6 | 8.8  | 22.63452 |
| 11UPR01_60.FIN2  | 66.2  | 1.303  | 7.715  | 0.092  | 0.3918  | 0.0044  | 0.81491 | 2197   | 11  | 2131   | 20  | 2260.9 | 8.2 | 2260.9 | 8.2  | 5.7455   |
| 11UPR01_61.FIN2  | 391   | 8.7    | 0.431  | 0.017  | 0.057   | 0.0022  | 0.97572 | 363    | 12  | 357    | 13  | 427    | 17  | 357    | 13   | 1.652893 |
| 11UPR01_62.FIN2  | 52.8  | 1.348  | 1.934  | 0.022  | 0.1752  | 0.0016  | 0.47706 | 1094.3 | 7.8 | 1040.7 | 9   | 1197   | 13  | 1040.7 | 9    | 4.98108  |
| 11UPR01_63.FIN2  | 322.5 | 2.37   | 3.11   | 0.1    | 0.2192  | 0.0059  | 0.98754 | 1434   | 27  | 1281   | 32  | 1674   | 14  | 1674   | 14   | 23.4767  |
| 11UPR01_64.FIN2  | 315   | 0.91   | 0.7904 | 0.0091 | 0.0937  | 0.001   | 0.55045 | 591.2  | 5.1 | 577.6  | 6.1 | 639    | 13  | 577.6  | 6.1  | 2.300406 |
| 11UPR01_65.FIN2  | 96.1  | 0.684  | 0.53   | 0.011  | 0.06891 | 0.00078 | 0.33117 | 431.4  | 7.6 | 429.5  | 4.7 | 463    | 28  | 429.5  | 4.7  | 0.440427 |
| 11UPR01_66.FIN2  | 510   | 1.79   | 0.0935 | 0.0017 | 0.01418 | 0.00023 | 0.5523  | 90.7   | 1.6 | 90.8   | 1.4 | 138    | 17  | 90.8   | 1.4  | 0.110254 |
| 11UPR01_67.FIN2  | 258   | 1.22   | 0.423  | 0.0083 | 0.05639 | 0.00083 | 0.93097 | 357.8  | 5.9 | 353.6  | 5   | 404    | 16  | 353.6  | 5    | 1.17384  |
| 11UPR01_68.FIN2  | 125.5 | 0.582  | 0.532  | 0.011  | 0.0683  | 0.0013  | 0.68102 | 432.4  | 7.5 | 425.8  | 7.7 | 485    | 20  | 425.8  | 7.7  | 1.526364 |
| 11UPR01_69.FIN2  | 261   | 1.77   | 2.385  | 0.03   | 0.2062  | 0.0024  | 0.88573 | 1235   | 10  | 1208   | 13  | 1290   | 13  | 1290   | 13   | 6.356589 |
| 11UPR01_70.FIN2  | 59.2  | 1.16   | 1.774  | 0.026  | 0.1687  | 0.002   | 0.21566 | 1035.1 | 9.7 | 1005   | 11  | 1103   | 20  | 1005   | 11   | 2.907932 |
| 11UPR01_71.FIN2  | 50.1  | 2.414  | 5.229  | 0.062  | 0.3243  | 0.0038  | 0.62741 | 1856   | 10  | 1810   | 18  | 1908.9 | 8.8 | 1908.9 | 8.8  | 5.180994 |
| 11UPR01_72.FIN2  | 56.5  | 1.948  | 2.19   | 0.025  | 0.2053  | 0.0024  | 0.29544 | 1177.4 | 7.8 | 1204   | 13  | 1132   | 16  | 1132   | 13   | 2.259215 |
| 11UPR01_73.FIN2  | 78.3  | 1.608  | 1.759  | 0.02   | 0.1709  | 0.0013  | 0.48415 | 1029.8 | 7.2 | 1018.1 | 6.9 | 1054   | 13  | 1018.1 | 6.9  | 1.136143 |
| 11UPR01_74.FIN2  | 410   | 3.1    | 1.828  | 0.026  | 0.1755  | 0.0037  | 0.98652 | 1048   | 16  | 1042   | 21  | 1074   | 11  | 1042   | 21   | 0.572519 |
| 11UPR01_75.FIN2  | 94.5  | 1.146  | 1.805  | 0.076  | 0.1662  | 0.0024  | 0.64552 | 1046   | 27  | 992    | 13  | 1196   | 60  | 992    | 13   | 5.162524 |
| 11UPR01_76.FIN2  | 67.1  | 1.078  | 0.537  | 0.011  | 0.06896 | 0.00079 | 0.12952 | 436    | 7.5 | 429.9  | 4.8 | 484    | 26  | 429.9  | 4.8  | 1.399083 |
| 11UPR01_77.FIN2  | 170   | 4.02   | 5.875  | 0.053  | 0.3561  | 0.0027  | 0.76063 | 1956.9 | 7.9 | 1963   | 13  | 1947.1 | 6.7 | 1947.1 | 6.7  | 0.816599 |
| 11UPR01_78.FIN2  | 201.5 | 11.15  | 2.125  | 0.016  | 0.1971  | 0.0017  | 0.50982 | 1156.6 | 5.2 | 1159.7 | 8.9 | 1149.1 | 9.2 | 1159.7 | 8.9  | 0.268027 |
| 11UPR01_79.FIN2  | 151.4 | 7.4    | 2.62   | 0.31   | 0.2     | 0.019   | 0.99473 | 1210   | 100 | 1160   | 110 | 1349   | 88  | 1160   | 110  | 4.132231 |
| 11UPR01_80.FIN2  | 218.9 | 0.688  | 4.001  | 0.034  | 0.2908  | 0.0024  | 0.75559 | 1634.8 | 6.7 | 1645   | 12  | 1620.8 | 7   | 1620.8 | 7    | 1.49309  |
| 11UPR01_81.FIN2  | 139.1 | 1.416  | 4.376  | 0.056  | 0.2942  | 0.0036  | 0.86609 | 1707   | 11  | 1662   | 18  | 1768.8 | 7.3 | 1768.8 | 7.3  | 6.037992 |
| 11UPR01_82.FIN2  | 324   | 1.944  | 0.544  | 0.089  | 0.0482  | 0.0063  | 0.99226 | 415    | 57  | 301    | 38  | 1157   | 82  | 301    | 38   | 27.46988 |
| 11UPR01_83.FIN2  | 310   | 2.45   | 1.718  | 0.047  | 0.1594  | 0.0035  | 0.93481 | 1012   | 18  | 953    | 19  | 1141   | 13  | 953    | 19   | 5.83004  |
| 11UPR01_84.FIN2  | 177   | 1.871  | 4.797  | 0.086  | 0.307   | 0.0049  | 0.87101 | 1782   | 15  | 1725   | 24  | 1847.2 | 9.9 | 1847.2 | 9.9  | 6.615418 |
| 11UPR01_85.FIN2  | 126.3 | 4.01   | 3.803  | 0.031  | 0.2733  | 0.0026  | 0.58621 | 1593   | 6.6 | 1557   | 13  | 1649.5 | 9.3 | 1649.5 | 9.3  | 5.60776  |
| 11UPR01_86.FIN2  | 119.1 | 1.749  | 2.467  | 0.029  | 0.2109  | 0.0021  | 0.5101  | 1261.8 | 8.4 | 1234   | 11  | 1313   | 11  | 1313   | 11   | 6.016756 |
| 11UPR01_87.FIN2  | 45    | 2.36   | 12.61  | 0.19   | 0.4906  | 0.0065  | 0.76949 | 2651   | 14  | 2572   | 28  | 2710   | 10  | 2710   | 10   | 5.092251 |
| 11UPR01_88.FIN2  | 347   | 2.147  | 4.704  | 0.036  | 0.316   | 0.0033  | 0.85357 | 1767.6 | 6.5 | 1770   | 16  | 1764.5 | 6.3 | 1764.5 | 6.3  | 0.311703 |
| 11UPR01_89.FIN2  | 187   | 1.139  | 13.51  | 0.14   | 0.5225  | 0.0045  | 0.77418 | 2715.2 | 9.8 | 2709   | 19  | 2734.6 | 8.1 | 2734.6 | 8.1  | 0.936152 |
| 11UPR01_90.FIN2  | 90.3  | 0.375  | 1.563  | 0.021  | 0.1597  | 0.0017  | 0.71055 | 955.1  | 8.2 | 955    | 9.5 | 963    | 12  | 955    | 9.5  | 0.01047  |
| 11UPR01_91.FIN2  | 39.1  | 1.809  | 2.024  | 0.028  | 0.1875  | 0.0019  | 0.26245 | 1123.9 | 9.2 | 1108   | 10  | 1179   | 16  | 1108   | 10   | 1.414717 |
| 11UPR01_92.FIN2  | 109   | 0.993  | 0.819  | 0.011  | 0.0982  | 0.001   | 0.20276 | 607.3  | 6   | 603.9  | 6.1 | 607    | 18  | 603.9  | 6.1  | 0.559855 |
| 11UPR01_93.FIN2  | 66.4  | 0.581  | 4.177  | 0.043  | 0.2971  | 0.0028  | 0.65523 | 1668.9 | 8.5 | 1677   | 14  | 1665   | 11  | 1665   | 11   | 0.720721 |
| 11UPR01_94.FIN2  | 71.7  | 0.813  | 3.146  | 0.035  | 0.2524  | 0.0027  | 0.70092 | 1443.2 | 8.5 | 1451   | 14  | 1442   | 13  | 1442   | 13   | 0.624133 |
| 11UPR01_95.FIN2  | 191.1 | 1.233  | 3.208  | 0.023  | 0.2515  | 0.0016  | 0.66746 | 1458.7 | 5.5 | 1446.1 | 8.4 | 1473.4 | 7.9 | 1473.4 | 7.9  | 1.852857 |
| 11UPR01_96.FIN2  | 276   | 4.44   | 1.711  | 0.014  | 0.1705  | 0.0012  | 0.42486 | 1012.4 | 5.3 | 1014.5 | 6.5 | 1010.2 | 9.7 | 1014.5 | 6.5  | 0.207428 |
| 11UPR01_97.FIN2  | 181.6 | 0.864  | 0.72   | 0.011  | 0.0887  | 0.0011  | 0.41142 | 550.5  | 6.4 | 548    | 6.3 | 575    | 14  | 548    | 6.3  | 0.454133 |
| 11UPR01_98.FIN2  | 228   | 1.592  | 3.343  | 0.043  | 0.2577  | 0.003   | 0.97706 | 1490   | 10  | 1478   | 15  | 1513.8 | 5.9 | 1513.8 | 5.9  | 2.364909 |
| 11UPR01_99.FIN2  | 80.8  | 0.7884 | 1.625  | 0.031  | 0.1663  | 0.0026  | 0.73413 | 979    | 12  | 991    | 15  | 953    | 18  | 991    | 15   | 1.225741 |
| 11UPR01_100.FIN2 | 126.5 | 0.926  | 4.103  | 0.036  | 0.2944  | 0.0025  | 0.4671  | 1654.6 | 7.1 | 1663   | 12  | 1654   | 10  | 1654   | 10   | 0.544135 |
| 11UPR01_101.FIN2 | 69.4  | 2.006  | 1.747  | 0.021  | 0.1665  | 0.0016  | 0.29802 | 1026.5 | 7.7 | 992.5  | 8.7 | 1105   | 13  | 992.5  | 8.7  | 3.312226 |
| 11UPR01_102.FIN2 | 211.2 | 1.554  | 0.3998 | 0.0051 | 0.05322 | 0.00053 | 0.18828 | 341.4  | 3.7 | 334.2  | 3.3 | 388    | 22  | 334.2  | 3.3  | 2.108963 |
| 11UPR01_103.FIN2 | 80.4  | 1.097  | 2.48   | 0.036  | 0.2162  | 0.0022  | 0.73992 | 1265   | 10  | 1262   | 12  | 1274   | 14  | 1274   | 14   | 0.941915 |
| 11UPR01_104.FIN2 | 34.7  | 1.027  | 2.457  | 0.043  | 0.2163  | 0.0028  | 0.51467 | 1259   | 13  | 1262   | 15  | 1251   | 19  | 1251   | 19   | 0.879297 |
| 11UPR01_105.FIN2 | 1400  | 64     | 4.21   | 0.68   | 0.235   | 0.031   | 0.97068 | 1480   | 150 | 1320   | 160 | 1961   | 64  | DISC   | DISC | 32.6874  |
| 11UPR01_106.FIN2 | 80.4  | 2.155  | 3.905  | 0.042  | 0.2775  | 0.0027  | 0.56665 | 1615.1 | 8.9 | 1578   | 14  | 1656   | 11  | 1656   | 11   | 4.710145 |
| 11UPR01_107.FIN2 | 387   | 1.97   | 0.2671 | 0.0033 | 0.03796 | 0.00042 | 0.46691 | 240.3  | 2.6 | 240.2  | 2.6 | 259    | 13  | 240.2  | 2.6  | 0.041615 |
| 11UPR01_108.FIN2 | 111.9 | 0.987  | 2.17   | 0.022  | 0.2007  | 0.0015  | 0.40671 | 1170.9 | 7.1 | 1178.8 | 8   | 1155   | 14  | 1178.8 | 8    | 0.674695 |
| 11UPR01_109.FIN2 | 83.2  | 1.005  | 5.692  | 0.051  | 0.3524  | 0.003   | 0.52356 | 1929.6 | 7.7 | 1946   | 14  | 1914.2 | 9.3 | 1914.2 | 9.3  | 1.661268 |
| 11UPR01_110.FIN2 | 930   | 1.93   | 2.12   | 0.18   | 0.168   | 0.017   | 0.9851  | 1131   | 68  | 985    | 99  | 1398   | 37  | 985    | 99   | 12.90893 |
| 11UPR01_111.FIN2 | 46.2  | 2.22   | 4.381  | 0.051  | 0.3014  | 0.003   | 0.52988 | 1707.8 | 9.7 | 1700   | 15  | 1723   | 13  | 1723   | 13   | 1.334881 |
| 11UPR01_112.FIN2 | 171.8 | 2.03   | 1.857  | 0.049  | 0.1772  | 0.003   | 0.8452  | 1067   | 18  | 1051   | 17  | 1124   | 27  | 1051   | 17   | 1.499531 |
| 11UPR01_113.FIN2 | 333   | 1.004  | 0.0937 | 0.0024 | 0.0136  | 0.00025 | 0.70674 | 90.9   | 2.2 | 87.1   | 1.6 | 219    | 29  | 87.1   | 1.6  | 4.180418 |
| 11UPR01_114.FIN2 | 486   | 1.03   | 0.577  | 0.01   | 0.0702  | 0.0013  | 0.9747  | 462.3  | 6.8 | 437    | 8.1 | 596    | 14  | 437    | 8.1  | 5.472637 |
| 11UPR01_115.FIN2 | 107   | 0.72   | 0.718  | 0.014  | 0.0896  | 0.0014  | 0.25045 | 549.7  | 8.2 | 552.8  | 8.4 | 559    | 30  | 552.8  | 8.4  | 0.563944 |
| 11UPR01_116.FIN2 | 71.4  | 0.706  | 3.771  | 0.042  | 0.2782  | 0.0026  | 0.60397 | 1586.9 | 9.2 | 1582   | 13  | 1584   |     |        |      |          |

|                 |       |        |        |        |         |         |         |        |     |        |     |        |          |        |     |          |
|-----------------|-------|--------|--------|--------|---------|---------|---------|--------|-----|--------|-----|--------|----------|--------|-----|----------|
| 11UPRO2_14.FIN2 | 191   | 1.215  | 2.567  | 0.033  | 0.2158  | 0.0028  | 0.78198 | 1290.8 | 9.5 | 1259   | 15  | 1340.8 | 9.9      | 1340.8 | 9.9 | 6.100835 |
| 11UPRO2_15.FIN2 | 371   | 1.65   | 1.92   | 0.035  | 0.1803  | 0.0025  | 0.87077 | 1087   | 12  | 1068   | 14  | 1102   | 13       | 1068   | 14  | 1.74793  |
| 11UPRO2_16.FIN2 | 122.4 | 1.6    | 3.52   | 0.14   | 0.2381  | 0.0024  | 0.12002 | 1533   | 32  | 1377   | 13  | 1786   | 78       | 1786   | 78  | 22.90034 |
| 11UPRO2_17.FIN2 | 69.3  | 1.677  | 3.207  | 0.051  | 0.2396  | 0.0047  | 0.53279 | 1457   | 12  | 1387   | 25  | 1545   | 24       | 1545   | 24  | 10.22654 |
| 11UPRO2_18.FIN2 | 226   | 0.706  | 0.5098 | 0.0063 | 0.06539 | 0.00067 | 0.35483 | 418.7  | 4.1 | 408.3  | 4.1 | 471    | 13       | 408.3  | 4.1 | 2.483879 |
| 11UPRO2_19.FIN2 | 106.5 | 1.92   | 1.91   | 0.018  | 0.176   | 0.0017  | 0.27503 | 1084.9 | 6.4 | 1044.9 | 9.3 | 1149   | 12       | 1044.9 | 9.3 | 3.686976 |
| 11UPRO2_20.FIN2 | 209   | 1.725  | 2.139  | 0.039  | 0.1756  | 0.0034  | 0.92939 | 1160   | 13  | 1042   | 19  | 1388   | 18       | 1042   | 19  | 10.17241 |
| 11UPRO2_21.FIN2 | 143.1 | 1.716  | 2.64   | 0.024  | 0.2226  | 0.0017  | 0.37583 | 1311.5 | 6.6 | 1295.5 | 9.2 | 1341.5 | 9.8      | 1341.5 | 9.8 | 3.428997 |
| 11UPRO2_22.FIN2 | 30.3  | 0.663  | 0.747  | 0.024  | 0.0918  | 0.0022  | 0.36718 | 566    | 14  | 566    | 13  | 613    | 40       | 566    | 13  | 0        |
| 11UPRO2_23.FIN2 | 319   | 1.525  | 0.4912 | 0.0067 | 0.06    | 0.0013  | 0.23412 | 405.6  | 4.5 | 375.7  | 8   | 561    | 56       | 375.7  | 8   | 7.371795 |
| 11UPRO2_24.FIN2 | 156   | 0.734  | 3.779  | 0.05   | 0.2772  | 0.0047  | 0.72661 | 1589   | 10  | 1577   | 24  | 1618   | 14       | 1618   | 14  | 2.533993 |
| 11UPRO2_25.FIN2 | 79    | 0.704  | 4.04   | 0.73   | 0.2641  | 0.0063  | 0.99503 | 1551   | 43  | 1510   | 31  | 1591   | 51       | 1591   | 51  | 5.091138 |
| 11UPRO2_26.FIN2 | 82.2  | 2.438  | 1.588  | 0.031  | 0.1552  | 0.003   | 0.74994 | 964    | 12  | 930    | 17  | 1052   | 21       | 930    | 17  | 3.526971 |
| 11UPRO2_27.FIN2 | 72.9  | 1.619  | 1.73   | 0.022  | 0.172   | 0.0018  | 0.48698 | 1018.9 | 8.2 | 1023.1 | 9.9 | 1025   | 14       | 1023.1 | 9.9 | 0.412209 |
| 11UPRO2_28.FIN2 | 134.5 | 1.12   | 2.501  | 0.034  | 0.2002  | 0.003   | 0.26004 | 1275.1 | 9.6 | 1176   | 16  | 1449   | 13       | 1176   | 16  | 7.771939 |
| 11UPRO2_29.FIN2 | 211   | 2.338  | 4.396  | 0.035  | 0.2965  | 0.0027  | 0.68339 | 1712.7 | 6.4 | 1673   | 13  | 1761.1 | 8.9      | 1761.1 | 8.9 | 5.002555 |
| 11UPRO2_30.FIN2 | 342   | 0.615  | 3.555  | 0.036  | 0.257   | 0.0027  | 0.79897 | 1539.1 | 8   | 1474   | 14  | 1628.8 | 8.7      | 1628.8 | 8.7 | 9.503929 |
| 11UPRO2_31.FIN2 | 294   | 2.23   | 4.181  | 0.038  | 0.2831  | 0.0029  | 0.80232 | 1669.8 | 7.6 | 1607   | 15  | 1745.9 | 6.7      | 1745.9 | 6.7 | 7.955782 |
| 11UPRO2_32.FIN2 | 142   | 1.702  | 2.639  | 0.03   | 0.2209  | 0.002   | 0.619   | 1311   | 8.3 | 1287   | 11  | 1353   | 11       | 1353   | 11  | 4.878049 |
| 11UPRO2_33.FIN2 | 56.6  | 2.225  | 1.532  | 0.027  | 0.1518  | 0.0021  | 0.66266 | 942    | 11  | 912    | 12  | 1021   | 14       | 912    | 12  | 3.184713 |
| 11UPRO2_34.FIN2 | 107   | 1.155  | 3.49   | 0.053  | 0.2458  | 0.0042  | 0.58858 | 1524   | 12  | 1416   | 22  | 1662   | 17       | 1662   | 17  | 14.80144 |
| 11UPRO2_35.FIN2 | 114   | 1.448  | 3.033  | 0.033  | 0.2338  | 0.0021  | 0.57012 | 1416.3 | 8.1 | 1354   | 11  | 1506   | 11       | 1506   | 11  | 10.09296 |
| 11UPRO2_36.FIN2 | 22.5  | 0.674  | 1.514  | 0.039  | 0.1374  | 0.0028  | 0.2312  | 936    | 15  | 830    | 16  | 1213   | 42       | 830    | 16  | 11.32479 |
| 11UPRO2_37.FIN2 | 127.6 | 0.841  | 1.878  | 0.025  | 0.1728  | 0.0019  | 0.60432 | 1072.8 | 8.9 | 1027   | 10  | 1177   | 16       | 1027   | 10  | 4.269202 |
| 11UPRO2_38.FIN2 | 191   | 0.549  | 4.025  | 0.083  | 0.291   | 0.0064  | 0.88057 | 1640   | 16  | 1645   | 32  | 1638   | 13       | 1638   | 13  | 0.42735  |
| 11UPRO2_39.FIN2 | 30.7  | 0.759  | 1.415  | 0.043  | 0.1382  | 0.0051  | 0.51975 | 893    | 18  | 834    | 29  | 1084   | 38       | 834    | 29  | 6.606943 |
| 11UPRO2_40.FIN2 | 332   | 1.261  | 1.469  | 0.043  | 0.1139  | 0.0037  | 0.94067 | 916    | 18  | 695    | 21  | 1511   | 15       | 695    | 21  | 24.12664 |
| 11UPRO2_41.FIN2 | 305   | 0.893  | 4.63   | 0.057  | 0.3021  | 0.0047  | 0.75469 | 1754   | 10  | 1701   | 23  | 1790   | 19       | 1790   | 19  | 4.972067 |
| 11UPRO2_42.FIN2 | 60.4  | 0.857  | 3.355  | 0.057  | 0.2515  | 0.003   | 0.68467 | 1495   | 13  | 1446   | 16  | 1543   | 19       | 1543   | 19  | 6.286455 |
| 11UPRO2_43.FIN2 | 326   | 1.211  | 0.5311 | 0.0086 | 0.0684  | 0.0011  | 0.66016 | 432.2  | 5.7 | 426.7  | 6.4 | 478    | 21       | 426.7  | 6.4 | 1.272559 |
| 11UPRO2_44.FIN2 | 164.8 | 12.8   | 0.6422 | 0.0088 | 0.07871 | 0.00083 | 0.39967 | 504.1  | 5.6 | 488.4  | 4.9 | 568    | 19       | 488.4  | 4.9 | 3.114461 |
| 11UPRO2_45.FIN2 | 289   | 1.144  | 0.652  | 0.011  | 0.06388 | 0.0008  | 0.29008 | 509.2  | 7   | 399.2  | 4.8 | 1056   | 26       | 399.2  | 4.8 | 21.60251 |
| 11UPRO2_46.FIN2 | 159.8 | 5.9    | 12.56  | 0.13   | 0.4863  | 0.0058  | 0.74199 | 2646.3 | 9.6 | 2554   | 25  | 2735.7 | 7        | 2735.7 | 7   | 6.64181  |
| 11UPRO2_47.FIN2 | 42.6  | 2.89   | 0.482  | 0.018  | 0.0592  | 0.0016  | 0.29716 | 402    | 12  | 370.6  | 9.7 | 564    | 40       | 370.6  | 9.7 | 7.810945 |
| 11UPRO2_48.FIN2 | 205   | 1.538  | 3.42   | 0.057  | 0.2518  | 0.0045  | 0.86431 | 1510   | 14  | 1447   | 23  | 1601   | 13       | 1601   | 13  | 9.618988 |
| 11UPRO2_49.FIN2 | 50.9  | 1.398  | 5.841  | 0.071  | 0.3264  | 0.0036  | 0.57617 | 1952   | 11  | 1820   | 17  | 2109   | 10       | 2109   | 10  | 13.70318 |
| 11UPRO2_50.FIN2 | 297   | 2.077  | 14     | 0.25   | 0.4921  | 0.0091  | 0.92099 | 2748   | 17  | 2579   | 39  | 2884   | 7.7      | 2884   | 7.7 | 10.57559 |
| 11UPRO2_51.FIN2 | 121.1 | 0.393  | 0.702  | 0.013  | 0.0889  | 0.0019  | 0.62527 | 539.2  | 7.8 | 549    | 11  | 541    | 24       | 549    | 11  | 1.817507 |
| 11UPRO2_52.FIN2 | 32.8  | 1.059  | 3.974  | 0.06   | 0.2867  | 0.0042  | 0.36738 | 1628   | 12  | 1625   | 21  | 1652   | 16       | 1652   | 16  | 1.634383 |
| 11UPRO2_53.FIN2 | 845   | 5.84   | 3.65   | 0.16   | 0.2419  | 0.0093  | 0.90128 | 1556   | 35  | 1399   | 48  | 1785   | 28       | 1785   | 28  | 21.62465 |
| 11UPRO2_54.FIN2 | 1110  | 0.854  | 0.0785 | 0.0045 | 0.01164 | 0.00062 | 0.9018  | 76.5   | 4.2 | 74.6   | 4   | 156    | 21       | 74.6   | 4   | 2.48366  |
| 11UPRO2_55.FIN2 | 117   | 2.03   | 0.797  | 0.018  | 0.0971  | 0.0019  | 0.56033 | 594    | 10  | 597    | 11  | 584    | 29       | 597    | 11  | 0.505051 |
| 11UPRO2_56.FIN2 | 276.7 | 1.158  | 2.639  | 0.075  | 0.1964  | 0.0062  | 0.87265 | 1313   | 20  | 1161   | 32  | 1603   | 22       | 1161   | 32  | 11.57654 |
| 11UPRO2_57.FIN2 | 46.4  | 0.609  | 1.751  | 0.027  | 0.1676  | 0.0025  | 0.1907  | 1026.4 | 9.8 | 1001   | 14  | 1067   | 25       | 1001   | 14  | 2.474669 |
| 11UPRO2_58.FIN2 | 105   | 1.238  | 1.64   | 0.02   | 0.1589  | 0.0017  | 0.38639 | 985    | 7.5 | 950.4  | 9.5 | 1060   | 14       | 950.4  | 9.5 | 3.51269  |
| 11UPRO2_59.FIN2 | 169   | 2.538  | 1.728  | 0.016  | 0.1738  | 0.002   | 0.40934 | 1019.5 | 6   | 1033   | 11  | 1003   | 14       | 1033   | 11  | 1.324179 |
| 11UPRO2_60.FIN2 | 73.9  | 0.8708 | 9.98   | 0.12   | 0.4522  | 0.0044  | 0.77425 | 2435   | 11  | 2404   | 19  | 2460.4 | 9        | 2460.4 | 9   | 2.29231  |
| 11UPRO2_61.FIN2 | 101.7 | 1.458  | 2.573  | 0.037  | 0.2161  | 0.0032  | 0.67791 | 1292   | 11  | 1261   | 17  | 1343   | 16       | 1343   | 16  | 6.105733 |
| 11UPRO2_62.FIN2 | 137.5 | 7.68   | 1.616  | 0.015  | 0.1607  | 0.0014  | 0.39104 | 975.9  | 5.9 | 960.5  | 7.8 | 1010.8 | 9.5      | 960.5  | 7.8 | 1.578031 |
| 11UPRO2_63.FIN2 | 131.3 | 1.256  | 1.679  | 0.014  | 0.1666  | 0.0015  | 0.35385 | 1000.5 | 5.3 | 993.4  | 8.2 | 1020   | 12       | 993.4  | 8.2 | 0.709645 |
| 11UPRO2_64.FIN2 | 263.8 | 3.17   | 4.306  | 0.03   | 0.2945  | 0.0027  | 0.74151 | 1694.3 | 5.8 | 1664   | 13  | 1739.8 | 8.3      | 1739.8 | 8.3 | 4.356823 |
| 11UPRO2_65.FIN2 | 299   | 11.1   | 1.731  | 0.068  | 0.1677  | 0.0048  | 0.92974 | 1024   | 24  | 998    | 27  | 1076   | 25       | 998    | 27  | 2.539063 |
| 11UPRO2_66.FIN2 | 47    | 0.549  | 0.905  | 0.071  | 0.4098  | 0.0038  | 0.60842 | 2347.2 | 7.2 | 2214   | 18  | 2467.5 | 8        | 2467.5 | 8   | 10.27356 |
| 11UPRO2_67.FIN2 | 138.7 | 1.589  | 0.3875 | 0.0066 | 0.05288 | 0.0006  | 0.29725 | 332.3  | 4.8 | 332.1  | 3.7 | 361    | 26       | 332.1  | 3.7 | 0.060187 |
| 11UPRO2_68.FIN2 | 178.8 | 0.9679 | 0.5122 | 0.0071 | 0.06655 | 0.00062 | 0.33539 | 419.7  | 4.8 | 415.3  | 3.7 | 456    | 18       | 415.3  | 3.7 | 1.048368 |
| 11UPRO2_69.FIN2 | 321   | 2.04   | 4.977  | 0.078  | 0.3135  | 0.004   | 0.9487  | 1811   | 15  | 1757   | 20  | 1882   | 11       | 1882   | 11  | 6.64187  |
| 11UPRO2_70.FIN2 | 118   | 0.983  | 3.285  | 0.034  | 0.2626  | 0.0024  | 0.4824  | 1478.5 | 8.3 | 1503   | 12  | 1437   | 12       | 1437   | 12  | 4.592902 |
| 11UPRO2_71.FIN2 | 651   | 2.164  | 2.347  | 0.033  | 0.1797  | 0.0028  | 0.87541 | 1226   | 10  | 1065   | 15  | 1522   | 11       | 1065   | 15  | 13.13214 |
| 11UPRO2_72.FIN2 | 30.4  | 1.14   | 3.455  | 0.058  | 0.2441  | 0.0037  | 0.37541 | 1517   | 13  | 1410   | 20  | 1661   | 18       | 1661   | 18  | 15.11138 |
| 11UPRO2_73.FIN2 | 0.68  | -4800  | 5.1    | 0.6    | 0.151   | 0.013   | 0.2385  | 1830   | 110 | 911    | 70  | 3260   | 140 DISC | DISC   |     | 50.21858 |
| 11UPRO2_74.FIN2 | 123.2 | 0.567  | 1.734  | 0.019  | 0.1671  | 0.0019  | 0.61639 | 1020.9 | 6.9 | 996    | 10  | 1082   | 11       | 996    | 10  | 2.439024 |
| 11UPRO2_75.FIN2 | 142.9 | 2.892  | 3.009  | 0.031  | 0.235   | 0.0028  | 0.69376 | 1410.5 | 8   | 1360   | 15  | 1483.9 | 8.3      | 1483.9 | 8.3 | 8.349619 |
| 11UPRO2_76.FIN2 | 221   | 0.828  | 3.544  | 0.038  | 0.2513  | 0.003   | 0.87111 | 1537.7 | 8.9 | 1445   | 15  | 1664.3 | 5.8      | 1664.3 | 5.8 | 13.17671 |
| 11UPRO2_77.FIN2 | 179   | 0.713  | 3.753  | 0.031  | 0.2698  | 0.0022  | 0.61682 | 1583.1 | 6.7 | 1540   | 11  | 1635.5 | 7.7      | 1635.5 | 7.7 | 5.839193 |
| 11UPRO2_78.FIN2 | 99    | 13.4   | 1.539  | 0.042  | 0.1523  | 0.0043  | 0.42468 | 945    | 17  | 913    | 24  | 1070   | 37       | 913    | 24  | 3.386243 |
| 11UPRO2_79.FIN2 | 288   | 1.95   | 1.726  | 0.016  | 0.1682  | 0.0022  | 0.94938 | 1017.8 | 6   | 1002   | 12  | 1046   | 15       | 1002   | 12  | 1.552368 |
| 11UPRO2_80.FIN2 | 242   | 1.727  | 3.257  | 0.048  | 0.2511  | 0.003   | 0.8041  | 1470   | 11  | 1444   | 16  | 1503   | 10       | 1503   | 10  | 3.925482 |
| 11UPRO2_81.FIN2 | 170   | 0.847  | 1.752  | 0.02   | 0.1708  | 0.0022  | 0.57198 | 1027.3 | 7.2 | 1016   | 12  | 1065   | 16       | 1016   | 12  | 1.099971 |
| 11UPRO2_82.FIN2 | 114.5 | 1.079  | 0.5312 | 0.0074 | 0.06779 | 0.00075 | 0.16035 | 432.4  | 4.9 | 422.8  | 4.5 | 487    | 24       | 422.8  | 4.5 | 2.220167 |
| 11UPRO2_83.FIN2 | 333   | 0.6437 | 3.744  | 0.033  | 0.2764  | 0.003   | 0.89582 | 1580.4 | 7   | 1570   | 16  | 1596.3 | 6.9      | 1596.3 | 6.9 | 1.64756  |
| 11UPRO2_84.FIN2 | 51    | 0.669  | 0.573  | 0.021  | 0.0703  | 0.0012  | 0.36984 | 458    | 13  | 437.8  | 7.3 | 580    | 60       | 437.8  | 7.3 | 4.41048  |
| 11UPRO2_85.FIN2 | 46.8  | 0.505  | 4.213  | 0.065  | 0.2918  | 0.003   | 0.47948 | 1677   | 12  | 1650   | 15  | 1700   | 1        |        |     |          |

|                  |       |        |        |        |         |         |          |        |     |        |     |        |     |        |     |          |
|------------------|-------|--------|--------|--------|---------|---------|----------|--------|-----|--------|-----|--------|-----|--------|-----|----------|
| 11UPR02_104.FIN2 | 131.4 | 0.855  | 1.83   | 0.021  | 0.1733  | 0.0012  | 0.4834   | 1055.9 | 7.4 | 1030.1 | 6.5 | 1094   | 13  | 1030.1 | 6.5 | 2.443413 |
| 11UPR02_105.FIN2 | 432   | 1.548  | 3.14   | 0.046  | 0.2375  | 0.0005  | 0.88771  | 1439   | 12  | 1373   | 26  | 1548   | 22  | 1548   | 22  | 11.30491 |
| 11UPR02_106.FIN2 | 108.6 | 1.254  | 0.786  | 0.015  | 0.0931  | 0.0016  | 0.016507 | 588.3  | 8.3 | 573.5  | 9.6 | 637    | 24  | 573.5  | 9.6 | 2.515723 |
| 11UPR02_107.FIN2 | 287.9 | 1.636  | 3.958  | 0.045  | 0.274   | 0.0026  | 0.74076  | 1626.6 | 9.1 | 1561   | 13  | 1723.1 | 8.7 | 1723.1 | 8.7 | 0.407463 |
| 11UPR02_108.FIN2 | 118.3 | 1.051  | 2.674  | 0.033  | 0.2256  | 0.0022  | 0.56528  | 1320.4 | 9.3 | 1311   | 12  | 1328   | 10  | 1328   | 10  | 1.28012  |
| 11UPR02_109.FIN2 | 252   | 3.518  | 4.005  | 0.079  | 0.2784  | 0.0042  | 0.88956  | 1634   | 16  | 1583   | 21  | 1702   | 13  | 1702   | 13  | 6.991774 |
| 11UPR02_110.FIN2 | 86.8  | 0.947  | 1.767  | 0.032  | 0.1727  | 0.0021  | 0.7963   | 1032   | 12  | 1027   | 11  | 1064   | 14  | 1027   | 11  | 0.484496 |
| 11UPR02_111.FIN2 | 197.1 | 0.436  | 0.3915 | 0.0057 | 0.05326 | 0.00053 | 0.35019  | 335.3  | 4.2 | 334.5  | 3.2 | 329    | 19  | 334.5  | 3.2 | 0.238592 |
| 11UPR02_112.FIN2 | 57.2  | 0.6321 | 13.66  | 0.12   | 0.5351  | 0.0061  | 0.61615  | 2727.8 | 8.3 | 2762   | 26  | 2699.7 | 8.5 | 2699.7 | 8.5 | 2.307664 |
| 11UPR02_113.FIN2 | 460   | 15.4   | 0.507  | 0.018  | 0.0666  | 0.0024  | 0.97049  | 415    | 13  | 415    | 15  | 417    | 15  | 415    | 15  | 0        |
| 11UPR02_114.FIN2 | 122.7 | 1.284  | 13.78  | 0.12   | 0.5152  | 0.0044  | 0.77857  | 2735.4 | 8.3 | 2678   | 19  | 2779.5 | 5   | 2779.5 | 5   | 3.651736 |
| 11UPR02_115.FIN2 | 142   | 2.65   | 3.644  | 0.029  | 0.2745  | 0.0019  | 0.68566  | 1558.9 | 6.2 | 1563.5 | 9.8 | 1552.5 | 8   | 1552.5 | 8   | 0.708535 |
| 11UPR02_116.FIN2 | 268   | 2.48   | 4.702  | 0.064  | 0.305   | 0.0007  | 0.4759   | 1768   | 12  | 1715   | 34  | 1840   | 29  | 1840   | 29  | 6.793478 |
| 11UPR02_117.FIN2 | 126.2 | 1.487  | 2.963  | 0.022  | 0.2424  | 0.0019  | 0.54626  | 1397.8 | 5.7 | 1399.2 | 9.7 | 1389.9 | 6.8 | 1389.9 | 6.8 | 0.669113 |
| 11UPR02_118.FIN2 | 200.6 | 2.114  | 2.964  | 0.024  | 0.2305  | 0.0022  | 0.62386  | 1398.1 | 6.2 | 1337   | 12  | 1488   | 8.9 | 1488   | 8.9 | 10.14785 |
| 11UPR02_119.FIN2 | 280   | 1.001  | 3.004  | 0.053  | 0.2012  | 0.0046  | 0.031526 | 1408   | 13  | 1181   | 25  | 1767   | 46  | 1181   | 25  | 16.12216 |
| 11UPR02_120.FIN2 | 102.3 | 1.347  | 3.174  | 0.032  | 0.2536  | 0.0024  | 0.49584  | 1451.4 | 7.5 | 1457   | 12  | 1438   | 11  | 1438   | 11  | 1.32128  |

|                 |       |       |        |        |         |         |          |       |     |       |     |      |    |       |     |          |
|-----------------|-------|-------|--------|--------|---------|---------|----------|-------|-----|-------|-----|------|----|-------|-----|----------|
| 11UPR03_1.FIN2  | 175   | 2.81  | 1.92   | 0.04   | 0.1813  | 0.0039  | 0.56931  | 1090  | 14  | 1073  | 21  | 1126 | 27 | 1073  | 21  | 1.559633 |
| 11UPR03_2.FIN2  | 56.4  | 0.935 | 4.374  | 0.08   | 0.3024  | 0.0064  | 0.6478   | 1705  | 15  | 1702  | 32  | 1708 | 22 | 1708  | 22  | 0.351288 |
| 11UPR03_3.FIN2  | 137   | 1.096 | 4.349  | 0.074  | 0.3023  | 0.0057  | 0.55049  | 1701  | 14  | 1702  | 28  | 1712 | 18 | 1712  | 18  | 0.584112 |
| 11UPR03_4.FIN2  | 169   | 2.276 | 4.528  | 0.071  | 0.3071  | 0.0055  | 0.66907  | 1736  | 13  | 1725  | 27  | 1756 | 17 | 1756  | 17  | 1.765376 |
| 11UPR03_5.FIN2  | 118.3 | 1.5   | 1.998  | 0.041  | 0.1873  | 0.0043  | 0.73108  | 1113  | 14  | 1106  | 23  | 1116 | 19 | 1106  | 23  | 0.628931 |
| 11UPR03_6.FIN2  | 297   | 1.251 | 0.93   | 0.048  | 0.0979  | 0.0025  | 0.5329   | 662   | 24  | 604   | 14  | 851  | 66 | 604   | 14  | 8.761329 |
| 11UPR03_7.FIN2  | 218.6 | 1.448 | 1.923  | 0.029  | 0.1846  | 0.0032  | 0.53408  | 1088  | 10  | 1092  | 18  | 1085 | 17 | 1092  | 18  | 0.367647 |
| 11UPR03_8.FIN2  | 100.7 | 1.257 | 2.508  | 0.053  | 0.2157  | 0.0052  | 0.47469  | 1272  | 15  | 1258  | 27  | 1324 | 27 | 1324  | 27  | 4.984894 |
| 11UPR03_9.FIN2  | 267   | 0.706 | 3.82   | 0.13   | 0.2537  | 0.0097  | 0.77299  | 1594  | 27  | 1456  | 50  | 1779 | 26 | 1779  | 26  | 18.15627 |
| 11UPR03_9.FIN2  | 172.2 | 0.718 | 4.878  | 0.085  | 0.3182  | 0.0073  | 0.5732   | 1797  | 15  | 1780  | 36  | 1819 | 18 | 1819  | 18  | 2.144035 |
| 11UPR03_10.FIN2 | 107.4 | 1.577 | 2.704  | 0.05   | 0.2242  | 0.006   | 0.49007  | 1330  | 14  | 1308  | 32  | 1385 | 27 | 1385  | 27  | 5.559567 |
| 11UPR03_11.FIN2 | 126.3 | 0.778 | 6.63   | 0.096  | 0.3623  | 0.0068  | 0.50154  | 2062  | 13  | 1992  | 32  | 2144 | 20 | 2144  | 20  | 7.089555 |
| 11UPR03_12.FIN2 | 379   | 10.9  | 0.903  | 0.023  | 0.1095  | 0.003   | 0.67842  | 657   | 13  | 669   | 17  | 627  | 30 | 669   | 17  | 1.826484 |
| 11UPR03_13.FIN2 | 80.7  | 1.571 | 1.839  | 0.037  | 0.1747  | 0.0035  | 0.39091  | 1060  | 13  | 1037  | 19  | 1114 | 24 | 1037  | 19  | 2.169811 |
| 11UPR03_14.FIN2 | 136.2 | 2.33  | 4.611  | 0.083  | 0.3091  | 0.0053  | 0.58853  | 1751  | 15  | 1735  | 26  | 1781 | 14 | 1781  | 14  | 2.582819 |
| 11UPR03_15.FIN2 | 96    | 1.487 | 12.11  | 0.2    | 0.508   | 0.011   | 0.6101   | 2611  | 16  | 2647  | 45  | 2594 | 17 | 2594  | 17  | 2.043177 |
| 11UPR03_16.FIN2 | 139.1 | 1.73  | 1.977  | 0.051  | 0.1865  | 0.0041  | 0.688    | 1105  | 18  | 1102  | 22  | 1103 | 25 | 1102  | 22  | 0.271493 |
| 11UPR03_17.FIN2 | 102.5 | 0.908 | 2.12   | 0.039  | 0.1951  | 0.0037  | 0.55746  | 1154  | 13  | 1151  | 20  | 1197 | 21 | 1151  | 20  | 0.259965 |
| 11UPR03_18.FIN2 | 274   | 1.289 | 2.179  | 0.033  | 0.1977  | 0.0035  | 0.53724  | 1175  | 11  | 1162  | 19  | 1195 | 19 | 1162  | 19  | 1.106383 |
| 11UPR03_19.FIN2 | 15.7  | 1.034 | 1.693  | 0.056  | 0.1646  | 0.0045  | 0.18821  | 1005  | 22  | 981   | 25  | 1057 | 39 | 981   | 25  | 2.38806  |
| 11UPR03_20.FIN2 | 62.7  | 1.421 | 3.377  | 0.083  | 0.229   | 0.0051  | 0.68658  | 1496  | 19  | 1328  | 26  | 1743 | 22 | 1743  | 22  | 23.80952 |
| 11UPR03_21.FIN2 | 123.3 | 2.283 | 2.626  | 0.052  | 0.2178  | 0.0048  | 0.59995  | 1306  | 15  | 1273  | 25  | 1369 | 17 | 1369  | 17  | 7.012418 |
| 11UPR03_22.FIN2 | 37.2  | 0.696 | 3.067  | 0.075  | 0.2431  | 0.006   | 0.38425  | 1424  | 19  | 1401  | 31  | 1461 | 28 | 1461  | 28  | 4.106776 |
| 11UPR03_23.FIN2 | 39    | 1.085 | 3.946  | 0.085  | 0.2774  | 0.0063  | 0.50359  | 1622  | 18  | 1577  | 32  | 1662 | 24 | 1662  | 24  | 5.11432  |
| 11UPR03_24.FIN2 | 304   | 0.715 | 0.509  | 0.01   | 0.0648  | 0.0012  | 0.4089   | 417.4 | 6.9 | 404.8 | 7.1 | 467  | 29 | 404.8 | 7.1 | 3.018687 |
| 11UPR03_25.FIN2 | 218   | 2.434 | 2.433  | 0.069  | 0.1881  | 0.0049  | 0.78853  | 1249  | 21  | 1113  | 26  | 1494 | 17 | 1113  | 26  | 10.88871 |
| 11UPR03_26.FIN2 | 184   | 0.749 | 0.443  | 0.012  | 0.0586  | 0.0013  | 0.20535  | 371.6 | 8.6 | 367.9 | 8   | 415  | 36 | 367.9 | 8   | 0.995694 |
| 11UPR03_27.FIN2 | 68.2  | 1.451 | 3.366  | 0.066  | 0.2582  | 0.0057  | 0.43923  | 1495  | 15  | 1479  | 29  | 1516 | 27 | 1516  | 27  | 2.440633 |
| 11UPR03_28.FIN2 | 700   | 1.431 | 0.3846 | 0.0082 | 0.05288 | 0.00091 | 0.5872   | 330.8 | 5.9 | 332.1 | 5.6 | 339  | 25 | 332.1 | 5.6 | 0.392987 |
| 11UPR03_29.FIN2 | 89.7  | 1.168 | 3.705  | 0.087  | 0.2692  | 0.0055  | 0.66926  | 1572  | 19  | 1536  | 28  | 1626 | 20 | 1626  | 20  | 5.535055 |
| 11UPR03_30.FIN2 | 134.3 | 0.533 | 3.84   | 0.058  | 0.2726  | 0.0053  | 0.58084  | 1601  | 13  | 1553  | 27  | 1669 | 18 | 1669  | 18  | 6.95027  |
| 11UPR03_31.FIN2 | 189   | 0.946 | 11.22  | 0.21   | 0.4758  | 0.009   | 0.70671  | 2539  | 18  | 2507  | 39  | 2575 | 13 | 2575  | 13  | 2.640777 |
| 11UPR03_32.FIN2 | 104.5 | 1.927 | 4.448  | 0.077  | 0.3039  | 0.0067  | 0.61839  | 1719  | 14  | 1709  | 33  | 1736 | 21 | 1736  | 21  | 1.5553   |
| 11UPR03_33.FIN2 | 54.6  | 1.996 | 1.837  | 0.052  | 0.1803  | 0.0042  | 0.2555   | 1058  | 18  | 1068  | 23  | 1038 | 37 | 1068  | 23  | 0.94518  |
| 11UPR03_34.FIN2 | 156.6 | 1.233 | 0.857  | 0.02   | 0.1035  | 0.0023  | 0.52095  | 629   | 11  | 635   | 14  | 606  | 25 | 635   | 14  | 0.953895 |
| 11UPR03_35.FIN2 | 38.4  | 0.778 | 3.97   | 0.087  | 0.2802  | 0.0061  | 0.38126  | 1630  | 18  | 1594  | 31  | 1691 | 23 | 1691  | 23  | 5.736251 |
| 11UPR03_36.FIN2 | 24.6  | 0.396 | 33.31  | 0.67   | 0.743   | 0.017   | 0.71044  | 3589  | 20  | 3575  | 62  | 3601 | 15 | 3601  | 15  | 0.722022 |
| 11UPR03_37.FIN2 | 141   | 3.54  | 1.845  | 0.035  | 0.1795  | 0.0032  | 0.21394  | 1062  | 12  | 1064  | 17  | 1077 | 25 | 1064  | 17  | 0.188324 |
| 11UPR03_38.FIN2 | 58.5  | 0.996 | 1.844  | 0.037  | 0.1779  | 0.0031  | 0.25626  | 1060  | 13  | 1055  | 17  | 1096 | 27 | 1055  | 17  | 0.471698 |
| 11UPR03_39.FIN2 | 204   | 15.9  | 1.567  | 0.027  | 0.1586  | 0.003   | 0.33395  | 958   | 11  | 949   | 17  | 985  | 27 | 949   | 17  | 0.939457 |
| 11UPR03_40.FIN2 | 191   | 2.389 | 2.047  | 0.034  | 0.1902  | 0.0035  | 0.61475  | 1130  | 11  | 1124  | 18  | 1154 | 18 | 1124  | 18  | 0.530973 |
| 11UPR03_41.FIN2 | 489   | 0.939 | 0.434  | 0.01   | 0.0461  | 0.0015  | 0.022333 | 366.2 | 7.5 | 290.6 | 9.1 | 873  | 78 | 290.6 | 9.1 | 20.64446 |
| 11UPR03_42.FIN2 | 147.9 | 1.41  | 5.377  | 0.09   | 0.3352  | 0.0062  | 0.65791  | 1883  | 14  | 1862  | 30  | 1918 | 14 | 1918  | 14  | 2.919708 |
| 11UPR03_43.FIN2 | 27.88 | 0.93  | 15.06  | 0.27   | 0.542   | 0.011   | 0.69898  | 2817  | 17  | 2793  | 48  | 2832 | 15 | 2832  | 15  | 1.377119 |
| 11UPR03_44.FIN2 | 220   | 2.325 | 3.543  | 0.06   | 0.2707  | 0.0047  | 0.53209  | 1535  | 13  | 1544  | 24  | 1523 | 21 | 1523  | 21  | 1.378858 |
| 11UPR03_45.FIN2 | 36.3  | 0.86  | 1.673  | 0.045  | 0.1679  | 0.005   | 0.29443  | 996   | 17  | 1000  | 28  | 1027 | 37 | 1000  | 28  | 0.401606 |
| 11UPR03_46.FIN2 | 134.5 | 1.706 | 1.736  | 0.035  | 0.1645  | 0.0037  | 0.59965  | 1022  | 13  | 983   | 20  | 1126 | 17 | 983   | 20  | 3.816047 |
| 11UPR03_47.FIN2 | 44.6  | 1.716 | 1.793  | 0.048  | 0.1747  | 0.0046  | 0.49705  | 1040  | 17  | 1037  | 25  | 1059 | 36 | 1037  | 25  | 0.288462 |
| 11UPR03_48.FIN2 | 206.4 | 1.6   | 5.579  | 0.094  | 0.339   | 0.0054  | 0.53693  | 1915  | 14  | 1881  | 26  | 1959 | 21 | 1959  | 21  | 3.981623 |
| 11UPR03_49.FIN2 | 96.9  | 1.358 | 0.529  | 0.018  | 0.0691  | 0.0014  | 0.1467   | 430   | 12  | 430.4 | 8.2 | 431  | 47 | 430.4 | 8.2 | 0.093023 |
| 11UPR03_50.FIN2 | 152   | 1.393 | 5.347  | 0.091  | 0.3317  | 0.0064  | 0.507    | 1874  | 15  | 1849  | 30  | 1897 | 18 | 1897  | 18  | 2.530311 |
| 11UPR03_51.FIN2 | 35.1  | 1.101 | 10.82  | 0.26   | 0.446   | 0.012   | 0.60158  | 2506  | 22  | 2375  | 56  | 2625 | 24 | 2625  | 24  | 9.52381  |
| 11UPR03_52.FIN2 | 155   | 1.442 | 3.134  | 0.06   | 0.2557  | 0.0057  | 0.56846  | 1443  | 14  | 1467  | 29  | 1428 | 27 | 1428  | 27  | 2.731092 |
| 11UPR03_53.FIN2 | 168   | 0.805 | 0.512  | 0.012  | 0.0677  | 0.0016  | 0.31494  | 418.9 | 8.2 | 422.1 | 9.6 | 428  | 32 | 422.1 | 9.6 | 0.763905 |
| 11UPR03_54.FIN2 | 44.9  | 0.772 | 3.775  | 0.088  | 0.2749  | 0.0071  | 0.68966  | 1584  | 19  | 1569  | 35  | 1624 | 18 | 1624  | 18  | 3.3867   |
| 11UPR03_55.FIN2 | 21.8  | 0.561 | 3.287  | 0.082  | 0.2577  | 0.0069  | 0.48351  | 1477  | 19  | 1481  | 36  | 1471 | 32 | 1471  | 32  | 0.67981  |
| 11UPR03_56.FIN2 | 269   | 3.346 | 1.759  | 0.038  | 0.1718  | 0.0035  | 0.57662  | 1029  | 14  | 1022  | 19  | 1072 | 24 | 1022  | 19  | 0.680272 |
| 11UPR03_57.FIN2 | 40.7  | 1.01  | 0.695  | 0.026  | 0.0858  | 0.0025  | 0.1435   | 535   | 15  | 530   | 15  | 575  | 51 | 530   | 15  | 0.934579 |
| 11UPR03_58.FIN2 | 223.7 | 0.312 | 12.37  | 0.22   | 0.4813  | 0.0095  | 0.64048  | 2635  | 17  | 2530  | 41  | 2719 | 13 | 2719  | 13  | 6.951085 |
| 11UPR03_59.FIN2 | 98.9  | 1.876 | 1.852  | 0.04   | 0.179   | 0.0035  | 0.39596  | 1062  | 14  | 1061  | 19  | 1076 | 29 | 1061  | 19  | 0.094162 |
| 11UPR03_60.FIN2 | 83.7  | 1.793 | 1.396  | 0.031  | 0.1444  | 0.0037  | 0.60429  | 888   | 14  | 869   | 21  | 946  | 35 | 869   | 21  | 2.13964  |
| 11UPR03_61.FIN2 | 234   | 4.79  | 0.614  | 0.011  | 0.0776  | 0.0015  | 0.42478  | 485.7 | 7   | 481.7 | 8.8 | 540  | 25 | 481.7 | 8.8 | 0.823554 |
| 11UPR03_62.FIN2 | 193   | 2.74  | 1.801  | 0.033  | 0.1761  | 0.0035  | 0.54135  | 1044  | 12  | 1045  | 19  | 1050 | 21 | 1045  | 19  | 0.095785 |
| 11UPR03_63.FIN2 | 83.5  | 1.21  | 1.747  | 0.037  | 0.1689  | 0.0034  | 0.46374  | 1024  | 14  | 1005  | 19  | 1070 | 24 | 1005  | 19  | 1.855469 |
| 11UPR03_64.FIN2 | 141.4 | 0.853 | 0.775  | 0.015  | 0.0942  | 0.0017  | 0.26566  | 581.7 | 8.8 | 579.9 | 9.7 | 617  | 31 | 579.9 | 9.7 | 0.309438 |
| 11UPR03_65.FIN2 | 96.1  | 0.561 | 0.84   | 0.028  | 0.0991  | 0.0021  | 0.41379  | 617   | 15  | 609   | 12  | 687  | 36 | 609   | 12  | 1.296596 |
| 11UPR03_66.FIN2 | 247   | 1.92  | 2.556  | 0.06   | 0.2214  | 0.0043  | 0.66197  | 1286  | 17  | 1288  | 23  | 1302 | 21 | 1302  | 21  | 1.075269 |
| 11UPR03_67.FIN2 | 167   | 1.477 | 4.164  | 0.081  | 0.2807  | 0.0053  | 0.71204  | 1667  | 16  | 1594  | 27  | 1764 | 14 | 1764  | 14  | 9.637188 |
| 11UPR03_68.FIN2 | 563   | 0.86  | 3.136  | 0.069  | 0.2539  | 0.0045  | 0.39337  | 1440  | 17  | 1458  | 23  | 1431 | 29 | 1431  | 29  | 1.886792 |
| 11UPR03_69.FIN2 | 502   | 156   | 1.959  | 0.031  | 0.1859  | 0.0034  | 0.58628  | 1102  | 11  | 1099  | 18  | 1138 | 16 | 1099  | 18  | 0.272232 |
| 11UPR03_70.FIN2 | 85.2  | 1.285 | 4.505  | 0.091  | 0.3036  | 0.0059  | 0.56669  | 1732  | 16  | 1708  | 29  | 1771 | 18 | 1771  | 18  | 3.557312 |
| 11UPR03_71.FIN2 | 182   | 0.919 | 5.407  | 0.094  | 0.3389  | 0.0061  | 0.63784  | 1886  | 15  | 1884  | 30  | 1886 | 15 | 1886  | 15  | 0.106004 |

|                  |       |       |        |        |         |         |          |        |     |       |     |      |     |       |     |          |
|------------------|-------|-------|--------|--------|---------|---------|----------|--------|-----|-------|-----|------|-----|-------|-----|----------|
| 11UPR03_72.FIN2  | 149.6 | 1.442 | 2.354  | 0.073  | 0.2014  | 0.0062  | 0.66845  | 1233   | 22  | 1182  | 34  | 1352 | 24  | 1182  | 34  | 4.136253 |
| 11UPR03_73.FIN2  | 155.7 | 1.246 | 5.76   | 0.12   | 0.3348  | 0.0067  | 0.53607  | 1941   | 17  | 1860  | 33  | 2033 | 19  | 2033  | 19  | 8.509592 |
| 11UPR03_74.FIN2  | 194   | 2.66  | 4.027  | 0.077  | 0.2908  | 0.0067  | 0.6009   | 1638   | 15  | 1645  | 34  | 1638 | 21  | 1638  | 21  | 0.42735  |
| 11UPR03_75.FIN2  | 132.6 | 1.196 | 4.878  | 0.08   | 0.3178  | 0.0051  | 0.40663  | 1798   | 14  | 1778  | 25  | 1815 | 18  | 1815  | 18  | 2.038567 |
| 11UPR03_76.FIN2  | 151.1 | 1.847 | 1.762  | 0.033  | 0.1713  | 0.0032  | 0.45757  | 1032   | 12  | 1019  | 18  | 1064 | 20  | 1019  | 18  | 1.25969  |
| 11UPR03_77.FIN2  | 124.1 | 0.832 | 1.734  | 0.038  | 0.1697  | 0.0035  | 0.55802  | 1021   | 14  | 1013  | 19  | 1043 | 29  | 1013  | 19  | 0.783546 |
| 11UPR03_78.FIN2  | 56.2  | 1.79  | 3.047  | 0.068  | 0.247   | 0.006   | 0.67967  | 1417   | 17  | 1422  | 31  | 1411 | 25  | 1411  | 25  | 0.779589 |
| 11UPR03_79.FIN2  | 272   | 0.828 | 0.4044 | 0.0084 | 0.05434 | 0.00085 | 0.16896  | 344.5  | 6.1 | 341.1 | 5.2 | 359  | 31  | 341.1 | 5.2 | 0.986938 |
| 11UPR03_80.FIN2  | 503   | 1.802 | 0.4461 | 0.0086 | 0.0595  | 0.0012  | 0.54277  | 375    | 5.9 | 372.6 | 7.1 | 403  | 24  | 372.6 | 7.1 | 0.64     |
| 11UPR03_81.FIN2  | 55.1  | 0.85  | 2.117  | 0.051  | 0.1944  | 0.0045  | 0.52623  | 1156   | 17  | 1147  | 25  | 1183 | 25  | 1147  | 25  | 0.778547 |
| 11UPR03_82.FIN2  | 123.5 | 1.601 | 4.733  | 0.086  | 0.3118  | 0.0075  | 0.66891  | 1773   | 16  | 1747  | 37  | 1807 | 17  | 1807  | 17  | 3.320421 |
| 11UPR03_83.FIN2  | 202   | 1.133 | 1.933  | 0.044  | 0.1809  | 0.0037  | 0.72222  | 1091   | 15  | 1071  | 20  | 1150 | 19  | 1071  | 20  | 1.833181 |
| 11UPR03_84.FIN2  | 41.9  | 0.529 | 2.389  | 0.057  | 0.2062  | 0.005   | 0.37592  | 1239   | 17  | 1211  | 27  | 1298 | 24  | 1298  | 24  | 6.702619 |
| 11UPR03_85.FIN2  | 314   | 1.169 | 0.817  | 0.019  | 0.0907  | 0.0027  | 0.16407  | 606    | 10  | 559   | 16  | 751  | 54  | 559   | 16  | 7.755776 |
| 11UPR03_86.FIN2  | 66.7  | 0.909 | 0.55   | 0.017  | 0.0699  | 0.0018  | 0.19774  | 444    | 11  | 435   | 11  | 482  | 33  | 435   | 11  | 2.027027 |
| 11UPR03_87.FIN2  | 17.5  | 0.293 | 4.09   | 0.14   | 0.2882  | 0.0079  | 0.51539  | 1645   | 27  | 1630  | 40  | 1674 | 36  | 1674  | 36  | 6.268435 |
| 11UPR03_88.FIN2  | 40.5  | 0.82  | 15.59  | 0.35   | 0.524   | 0.013   | 0.70272  | 2852   | 21  | 2713  | 55  | 2952 | 16  | 2952  | 16  | 8.096206 |
| 11UPR03_89.FIN2  | 279   | 1.214 | 3.427  | 0.054  | 0.2606  | 0.005   | 0.57782  | 1513   | 12  | 1492  | 26  | 1539 | 17  | 1539  | 17  | 3.053931 |
| 11UPR03_90.FIN2  | 254   | 1.617 | 0.733  | 0.018  | 0.087   | 0.0024  | 0.71394  | 557    | 11  | 537   | 14  | 655  | 25  | 537   | 14  | 3.590664 |
| 11UPR03_91.FIN2  | 67.8  | 2.811 | 4.383  | 0.099  | 0.2917  | 0.006   | 0.78309  | 1706   | 19  | 1649  | 30  | 1804 | 20  | 1804  | 20  | 8.592018 |
| 11UPR03_92.FIN2  | 539   | 0.681 | 0.454  | 0.012  | 0.05769 | 0.00093 | 0.32451  | 379.3  | 8.1 | 361.5 | 5.7 | 472  | 33  | 361.5 | 5.7 | 4.692855 |
| 11UPR03_93.FIN2  | 123.1 | 1.792 | 3.853  | 0.075  | 0.2765  | 0.0059  | 0.54137  | 1604   | 15  | 1576  | 29  | 1655 | 19  | 1655  | 19  | 4.773414 |
| 11UPR03_94.FIN2  | 93    | 1.458 | 4.567  | 0.083  | 0.3123  | 0.0063  | 0.58827  | 1745   | 14  | 1755  | 30  | 1720 | 21  | 1720  | 21  | 2.034884 |
| 11UPR03_95.FIN2  | 128.7 | 0.794 | 4.164  | 0.056  | 0.2886  | 0.0046  | 0.49224  | 1667   | 11  | 1634  | 23  | 1707 | 16  | 1707  | 16  | 4.276508 |
| 11UPR03_96.FIN2  | 217.8 | 0.805 | 2.161  | 0.039  | 0.1953  | 0.0043  | 0.58123  | 1167   | 13  | 1149  | 23  | 1187 | 20  | 1149  | 23  | 1.542416 |
| 11UPR03_97.FIN2  | 202.4 | 2.45  | 1.72   | 0.03   | 0.1691  | 0.0029  | 0.52585  | 1016   | 11  | 1007  | 16  | 1050 | 14  | 1007  | 16  | 0.885827 |
| 11UPR03_98.FIN2  | 120   | 1.85  | 5.92   | 0.12   | 0.3411  | 0.0073  | 0.69629  | 1964   | 17  | 1890  | 35  | 2070 | 15  | 2070  | 15  | 8.695652 |
| 11UPR03_99.FIN2  | 263   | 1.272 | 6.84   | 0.11   | 0.3879  | 0.0064  | 0.58132  | 2091   | 14  | 2112  | 30  | 2081 | 13  | 2081  | 13  | 1.489668 |
| 11UPR03_100.FIN2 | 166   | 1.002 | 4.32   | 0.08   | 0.2975  | 0.006   | 0.63585  | 1699   | 15  | 1678  | 30  | 1725 | 16  | 1725  | 16  | 2.724638 |
| 11UPR03_101.FIN2 | 99.9  | 2.548 | 4.859  | 0.098  | 0.3235  | 0.0071  | 0.64209  | 1795   | 17  | 1805  | 35  | 1802 | 18  | 1802  | 18  | 0.166482 |
| 11UPR03_102.FIN2 | 209   | 1.506 | 4.037  | 0.063  | 0.2911  | 0.006   | 0.56225  | 1642   | 13  | 1646  | 30  | 1648 | 16  | 1648  | 16  | 0.121359 |
| 11UPR03_103.FIN2 | 85    | 1.706 | 1.965  | 0.039  | 0.1846  | 0.0039  | 0.51956  | 1102   | 13  | 1092  | 21  | 1152 | 25  | 1092  | 21  | 0.907441 |
| 11UPR03_104.FIN2 | 29.6  | 0.59  | 3.254  | 0.066  | 0.2461  | 0.0057  | 0.44376  | 1468   | 16  | 1417  | 29  | 1533 | 23  | 1533  | 23  | 7.566862 |
| 11UPR03_105.FIN2 | 41.7  | 0.692 | 3.962  | 0.084  | 0.2842  | 0.0061  | 0.48147  | 1626   | 18  | 1615  | 30  | 1650 | 18  | 1650  | 18  | 2.121212 |
| 11UPR03_106.FIN2 | 68.1  | 0.986 | 0.85   | 0.028  | 0.1001  | 0.0025  | 0.30083  | 625    | 16  | 615   | 15  | 676  | 44  | 615   | 15  | 1.6      |
| 11UPR03_107.FIN2 | 283   | 1.03  | 3.737  | 0.054  | 0.2689  | 0.0046  | 0.56255  | 1580   | 12  | 1534  | 24  | 1654 | 16  | 1654  | 16  | 7.255139 |
| 11UPR03_108.FIN2 | 103.3 | 1.137 | 0.867  | 0.019  | 0.1015  | 0.0026  | 0.37427  | 634.5  | 9.8 | 623   | 15  | 687  | 36  | 623   | 15  | 1.812451 |
| 11UPR03_109.FIN2 | 641   | 7.32  | 4.38   | 0.11   | 0.2924  | 0.0087  | 0.50292  | 1709   | 21  | 1652  | 44  | 1816 | 42  | 1816  | 42  | 9.030837 |
| 11UPR03_110.FIN2 | 303   | 1.65  | 2.174  | 0.037  | 0.195   | 0.0039  | 0.45386  | 1175   | 12  | 1148  | 21  | 1228 | 22  | 1148  | 21  | 2.297872 |
| 11UPR03_111.FIN2 | 38.4  | 0.902 | 5.06   | 0.13   | 0.3152  | 0.0073  | 0.60862  | 1827   | 21  | 1769  | 35  | 1890 | 25  | 1890  | 25  | 6.402116 |
| 11UPR03_112.FIN2 | 226.9 | 1.098 | 0.472  | 0.01   | 0.0616  | 0.0014  | 0.42931  | 392.3  | 7.1 | 385.3 | 8.3 | 422  | 35  | 385.3 | 8.3 | 1.784349 |
| 11UPR03_113.FIN2 | 119.9 | 1.496 | 7.12   | 0.15   | 0.3739  | 0.0075  | 0.38942  | 2123   | 18  | 2046  | 35  | 2213 | 27  | 2213  | 27  | 7.546317 |
| 11UPR03_114.FIN2 | 279   | 1.129 | 2.136  | 0.031  | 0.1896  | 0.003   | 0.48352  | 1160   | 10  | 1119  | 16  | 1244 | 15  | 1119  | 16  | 6.334483 |
| 11UPR03_115.FIN2 | 334   | 0.924 | 0.3796 | 0.0079 | 0.0523  | 0.0012  | 0.6004   | 326.4  | 5.8 | 328.3 | 7   | 336  | 29  | 328.3 | 7   | 0.582108 |
| 11UPR03_116.FIN2 | 847   | 1.84  | 0.338  | 0.01   | 0.0417  | 0.0012  | 0.27217  | 295.4  | 7.6 | 263   | 7.4 | 573  | 94  | 263   | 7.4 | 10.96818 |
| 11UPR03_117.FIN2 | 34.8  | 0.674 | 2.331  | 0.054  | 0.2036  | 0.0052  | 0.48276  | 1219   | 16  | 1198  | 29  | 1286 | 31  | 1198  | 29  | 1.722724 |
| 11UPR03_118.FIN2 | 134.4 | 1.251 | 1.871  | 0.049  | 0.1775  | 0.0035  | 0.43421  | 1068   | 17  | 1053  | 19  | 1112 | 38  | 1053  | 19  | 1.404494 |
| 11UPR03_119.FIN2 | 158.5 | 2.383 | 1.813  | 0.029  | 0.1762  | 0.0035  | 0.56691  | 1049   | 10  | 1046  | 19  | 1047 | 20  | 1046  | 19  | 0.285987 |
| 11UPR03_120.FIN2 | 211   | 1.175 | 5.104  | 0.094  | 0.3306  | 0.007   | 0.65335  | 1835   | 16  | 1839  | 34  | 1836 | 17  | 1836  | 17  | 0.163399 |
| 11UPR03_121.FIN2 | 75.5  | 1.157 | 3.218  | 0.051  | 0.2461  | 0.0047  | 0.42016  | 1464   | 13  | 1418  | 24  | 1523 | 24  | 1523  | 24  | 6.894288 |
| 11UPR04_1.FIN2   | 75.4  | 1.8   | 3.837  | 0.073  | 0.2785  | 0.0057  | 0.70285  | 1602   | 15  | 1583  | 28  | 1610 | 16  | 1610  | 16  | 1.677019 |
| 11UPR04_2.FIN2   | 181   | 0.943 | 1.878  | 0.055  | 0.1331  | 0.0044  | 0.79529  | 1071   | 19  | 805   | 25  | 1692 | 24  | 805   | 25  | 24.8366  |
| 11UPR04_3.FIN2   | 223   | 0.801 | 1.88   | 0.11   | 0.1551  | 0.0054  | 0.3661   | 1071   | 37  | 929   | 30  | 1400 | 96  | 929   | 30  | 13.25864 |
| 11UPR04_3.FIN2   | 162   | 0.677 | 2.405  | 0.053  | 0.2204  | 0.0052  | 0.72102  | 1243   | 16  | 1283  | 27  | 1184 | 23  | 1184  | 27  | 3.218021 |
| 11UPR04_5.FIN2   | 163.9 | 0.688 | 3.597  | 0.06   | 0.2628  | 0.0052  | 0.63088  | 1549   | 13  | 1503  | 26  | 1622 | 18  | 1622  | 18  | 7.336621 |
| 11UPR04_6.FIN2   | 45.4  | 1.54  | 0.771  | 0.027  | 0.0927  | 0.0026  | 0.56949  | 584    | 15  | 571   | 15  | 598  | 43  | 571   | 15  | 2.226027 |
| 11UPR04_7.FIN2   | 143.5 | 0.635 | 1.561  | 0.028  | 0.1579  | 0.003   | 0.67152  | 955    | 11  | 945   | 17  | 971  | 18  | 945   | 17  | 1.04712  |
| 11UPR04_8.FIN2   | 520   | 2.158 | 1.754  | 0.024  | 0.1702  | 0.0032  | 0.48537  | 1028.1 | 8.8 | 1013  | 18  | 1052 | 19  | 1013  | 18  | 1.468729 |
| 11UPR04_9.FIN2   | 137.9 | 7.69  | 2.246  | 0.044  | 0.2019  | 0.0041  | 0.61969  | 1197   | 14  | 1185  | 22  | 1223 | 16  | 1185  | 22  | 1.002506 |
| 11UPR04_10.FIN2  | 11.12 | -89   | 1.001  | 0.065  | 0.0898  | 0.0035  | 0.074307 | 695    | 32  | 554   | 21  | 1180 | 82  | 554   | 21  | 20.28777 |
| 11UPR04_11.FIN2  | 76.4  | 1.557 | 4.808  | 0.081  | 0.3182  | 0.0074  | 0.57423  | 1786   | 14  | 1779  | 36  | 1781 | 23  | 1781  | 23  | 0.112296 |
| 11UPR04_12.FIN2  | 122.4 | 3.707 | 4.35   | 0.081  | 0.3052  | 0.0055  | 0.59446  | 1705   | 15  | 1716  | 27  | 1716 | 18  | 1716  | 18  | 0        |
| 11UPR04_13.FIN2  | 47.25 | 1.312 | 6.82   | 0.12   | 0.3751  | 0.0075  | 0.50242  | 2087   | 16  | 2052  | 35  | 2129 | 22  | 2129  | 22  | 3.616721 |
| 11UPR04_14.FIN2  | 483   | 1.339 | 0.5233 | 0.0097 | 0.068   | 0.0015  | 0.56915  | 427    | 6.5 | 424.1 | 9.1 | 467  | 35  | 424.1 | 9.1 | 0.679157 |
| 11UPR04_15.FIN2  | 590   | 1.061 | 1.718  | 0.072  | 0.1221  | 0.0048  | 0.71006  | 1011   | 26  | 742   | 28  | 1639 | 19  | 742   | 28  | 26.60732 |
| 11UPR04_16.FIN2  | 125.1 | 1.514 | 15.68  | 0.28   | 0.541   | 0.014   | 0.48472  | 2859   | 18  | 2798  | 56  | 2918 | 20  | 2918  | 20  | 4.112406 |
| 11UPR04_17.FIN2  | 204   | 1.306 | 0.619  | 0.015  | 0.0782  | 0.0016  | 0.42294  | 489.6  | 9.3 | 485.5 | 9.3 | 502  | 30  | 485.5 | 9.3 | 0.837418 |
| 11UPR04_18.FIN2  | 236.3 | 2.71  | 1.881  | 0.058  | 0.1817  | 0.0066  | 0.68647  | 1078   | 22  | 1076  | 36  | 1075 | 40  | 1076  | 36  | 0.185529 |
| 11UPR04_18.FIN2  | 145   | 2.2   | 3.67   | 0.14   | 0.2782  | 0.0092  | 0.75502  | 1577   | 29  | 1581  | 46  | 1563 | 30  | 1563  | 30  | 1.151631 |
| 11UPR04_19.FIN2  | 177.2 | 1.424 | 0.82   | 0.014  | 0.0983  | 0.0017  | 0.30351  | 607.3  | 7.8 | 605   | 10  | 621  | 31  | 605   | 10  | 0.378726 |
| 11UPR04_20.FIN2  | 184.1 | 0.955 | 0.897  | 0.068  | 0.0736  | 0.0025  | 0.35519  | 633    | 24  | 457   | 15  | 1290 | 120 | 457   | 15  | 27.80411 |
| 11UPR04_21.FIN2  | 286.6 | 1.122 | 4.3    | 0.1    | 0.288   | 0.0086  | 0.54542  | 1692   | 19  | 1631  | 43  | 1772 | 31  | 1772  | 31  | 7.957111 |
| 11UPR04_21.FIN2  | 175.3 | 1.148 | 4.9    | 0.1    |         |         |          |        |     |       |     |      |     |       |     |          |

|                  |       |       |        |        |         |         |         |       |     |       |     |      |     |       |     |          |
|------------------|-------|-------|--------|--------|---------|---------|---------|-------|-----|-------|-----|------|-----|-------|-----|----------|
| 11UPR04_38.FIN2  | 292.1 | 5.04  | 3.97   | 0.056  | 0.285   | 0.0058  | 0.61106 | 1629  | 12  | 1615  | 29  | 1653 | 16  | 1653  | 16  | 2.298851 |
| 11UPR04_39.FIN2  | 43.1  | 1.364 | 15.17  | 0.27   | 0.538   | 0.012   | 0.60049 | 2824  | 17  | 2775  | 48  | 2850 | 16  | 2850  | 16  | 2.631579 |
| 11UPR04_40.FIN2  | 45.1  | 1.802 | 1.706  | 0.039  | 0.1718  | 0.0044  | 0.43275 | 1009  | 15  | 1021  | 24  | 1008 | 33  | 1021  | 24  | 1.189296 |
| 11UPR04_41.FIN2  | 236   | 1.343 | 0.549  | 0.011  | 0.0725  | 0.0016  | 0.47253 | 444   | 7.2 | 451.3 | 9.3 | 421  | 26  | 451.3 | 9.3 | 1.644144 |
| 11UPR04_42.FIN2  | 133.8 | 0.874 | 1.793  | 0.034  | 0.177   | 0.0038  | 0.55814 | 1043  | 13  | 1050  | 21  | 1051 | 22  | 1050  | 21  | 0.671141 |
| 11UPR04_43.FIN2  | 160   | 0.942 | 4.47   | 0.11   | 0.2943  | 0.0065  | 0.76556 | 1728  | 21  | 1662  | 32  | 1807 | 21  | 1807  | 21  | 8.02435  |
| 11UPR04_44.FIN2  | 253   | 1.956 | 3.891  | 0.056  | 0.2775  | 0.0052  | 0.45723 | 1612  | 11  | 1578  | 26  | 1652 | 19  | 1652  | 19  | 4.479419 |
| 11UPR04_45.FIN2  | 165.1 | 0.63  | 4.262  | 0.075  | 0.2947  | 0.0056  | 0.62138 | 1684  | 15  | 1664  | 28  | 1706 | 16  | 1706  | 16  | 2.461899 |
| 11UPR04_46.FIN2  | 124   | 2.026 | 1.795  | 0.029  | 0.1753  | 0.004   | 0.36391 | 1044  | 11  | 1040  | 22  | 1049 | 24  | 1040  | 22  | 0.383142 |
| 11UPR04_47.FIN2  | 271   | 0.898 | 0.402  | 0.01   | 0.0539  | 0.0011  | 0.17015 | 342.4 | 7.3 | 338.1 | 6.7 | 369  | 30  | 338.1 | 6.7 | 1.255841 |
| 11UPR04_48.FIN2  | 184.8 | 2.573 | 1.972  | 0.036  | 0.1833  | 0.0043  | 0.58775 | 1105  | 12  | 1084  | 23  | 1141 | 24  | 1084  | 23  | 1.900452 |
| 11UPR04_49.FIN2  | 14.25 | 2.85  | 1.146  | 0.073  | 0.116   | 0.0059  | 0.23438 | 770   | 35  | 707   | 34  | 1067 | 98  | 707   | 34  | 8.181818 |
| 11UPR04_50.FIN2  | 168.1 | 0.507 | 4.123  | 0.067  | 0.2944  | 0.0054  | 0.53755 | 1659  | 13  | 1666  | 26  | 1655 | 14  | 1655  | 14  | 0.664653 |
| 11UPR04_51.FIN2  | 145   | 1.104 | 1.19   | 0.17   | 0.0953  | 0.0024  | 0.7477  | 723   | 49  | 587   | 14  | 1190 | 160 | 587   | 14  | 18.81051 |
| 11UPR04_52.FIN2  | 599   | 2.77  | 0.4529 | 0.009  | 0.0599  | 0.001   | 0.56255 | 380.7 | 6.3 | 374.9 | 6.1 | 414  | 22  | 374.9 | 6.1 | 1.523509 |
| 11UPR04_53.FIN2  | 123.4 | 1.203 | 4.05   | 0.07   | 0.2915  | 0.0057  | 0.60077 | 1644  | 14  | 1648  | 28  | 1659 | 18  | 1659  | 18  | 0.66305  |
| 11UPR04_54.FIN2  | 248   | 1.134 | 3.181  | 0.059  | 0.2482  | 0.0044  | 0.6245  | 1451  | 14  | 1431  | 22  | 1498 | 13  | 1498  | 13  | 4.47263  |
| 11UPR04_55.FIN2  | 190   | 1.371 | 3.602  | 0.072  | 0.2793  | 0.0061  | 0.68994 | 1550  | 16  | 1586  | 31  | 1495 | 17  | 1495  | 17  | 6.086957 |
| 11UPR04_56.FIN2  | 20.38 | 1.012 | 1.749  | 0.056  | 0.1636  | 0.0048  | 0.43867 | 1026  | 21  | 980   | 26  | 1172 | 45  | 980   | 26  | 4.483431 |
| 11UPR04_57.FIN2  | 96.4  | 0.933 | 3.43   | 0.12   | 0.2562  | 0.0051  | 0.65475 | 1524  | 30  | 1470  | 26  | 1559 | 45  | 1559  | 45  | 5.708788 |
| 11UPR04_58.FIN2  | 95.3  | 1.207 | 2.637  | 0.05   | 0.2246  | 0.004   | 0.55155 | 1311  | 14  | 1306  | 21  | 1335 | 19  | 1335  | 19  | 2.172285 |
| 11UPR04_59.FIN2  | 258   | 0.433 | 0.848  | 0.015  | 0.1005  | 0.0019  | 0.4135  | 623.1 | 8.3 | 617   | 11  | 632  | 23  | 617   | 11  | 0.978976 |
| 11UPR04_60.FIN2  | 86.5  | 0.485 | 1.796  | 0.035  | 0.1726  | 0.0037  | 0.53413 | 1043  | 13  | 1026  | 20  | 1094 | 30  | 1026  | 20  | 1.629914 |
| 11UPR04_61.FIN2  | 30    | 0.563 | 2.87   | 0.24   | 0.1858  | 0.0056  | 0.68831 | 1341  | 60  | 1098  | 30  | 1790 | 120 | 1098  | 30  | 18.12081 |
| 11UPR04_62.FIN2  | 113.9 | 0.637 | 4.024  | 0.065  | 0.2891  | 0.006   | 0.59028 | 1637  | 13  | 1636  | 30  | 1654 | 14  | 1654  | 14  | 1.088271 |
| 11UPR04_64.FIN2  | 339   | 2.78  | 1.822  | 0.03   | 0.1778  | 0.0038  | 0.63226 | 1052  | 11  | 1054  | 21  | 1051 | 20  | 1054  | 21  | 0.190114 |
| 11UPR04_65.FIN2  | 235.2 | 0.674 | 0.514  | 0.01   | 0.0682  | 0.0013  | 0.53463 | 421.8 | 6.8 | 425.4 | 7.6 | 442  | 25  | 425.4 | 7.6 | 0.853485 |
| 11UPR04_66.FIN2  | 379   | 1.516 | 4.233  | 0.064  | 0.3012  | 0.0048  | 0.49608 | 1679  | 12  | 1696  | 24  | 1661 | 18  | 1661  | 18  | 2.107164 |
| 11UPR04_67.FIN2  | 752   | 2.28  | 3.425  | 0.097  | 0.2308  | 0.0074  | 0.74914 | 1513  | 21  | 1338  | 39  | 1773 | 31  | 1773  | 31  | 24.53469 |
| 11UPR04_68.FIN2  | 108.2 | 1.564 | 4.731  | 0.098  | 0.3195  | 0.0069  | 0.63349 | 1772  | 17  | 1790  | 33  | 1739 | 17  | 1739  | 17  | 2.93272  |
| 11UPR04_69.FIN2  | 80.8  | 0.986 | 3.285  | 0.065  | 0.2571  | 0.0052  | 0.57339 | 1475  | 15  | 1474  | 26  | 1496 | 21  | 1496  | 21  | 1.470588 |
| 11UPR04_70.FIN2  | 153   | 2.041 | 2.043  | 0.046  | 0.1855  | 0.0042  | 0.49788 | 1132  | 16  | 1099  | 23  | 1206 | 30  | 1099  | 23  | 2.915194 |
| 11UPR04_71.FIN2  | 101.5 | 0.731 | 0.462  | 0.015  | 0.0609  | 0.0014  | 0.34211 | 385   | 10  | 381.1 | 8.5 | 428  | 43  | 381.1 | 8.5 | 1.012987 |
| 11UPR04_72.FIN2  | 22.6  | 1.984 | 2.232  | 0.068  | 0.2011  | 0.005   | 0.42379 | 1190  | 21  | 1180  | 27  | 1226 | 30  | 1180  | 27  | 0.840336 |
| 11UPR04_73.FIN2  | 290   | 0.846 | 0.502  | 0.0092 | 0.0665  | 0.0012  | 0.40175 | 412.7 | 6.2 | 415.2 | 7.5 | 422  | 24  | 415.2 | 7.5 | 0.605767 |
| 11UPR04_74.FIN2  | 553   | 0.711 | 0.4856 | 0.0091 | 0.0608  | 0.0016  | 0.70082 | 401.6 | 6.2 | 380.2 | 9.6 | 527  | 21  | 380.2 | 9.6 | 5.328685 |
| 11UPR04_75.FIN2  | 80.2  | 0.594 | 0.777  | 0.031  | 0.0907  | 0.0019  | 0.13608 | 583   | 18  | 559   | 11  | 657  | 60  | 559   | 11  | 4.116638 |
| 11UPR04_76.FIN2  | 408   | 2.59  | 1.949  | 0.036  | 0.1841  | 0.0031  | 0.51845 | 1098  | 13  | 1091  | 17  | 1137 | 21  | 1091  | 17  | 0.637523 |
| 11UPR04_77.FIN2  | 203   | 2.11  | 4.972  | 0.096  | 0.3258  | 0.0088  | 0.71449 | 1813  | 16  | 1816  | 43  | 1811 | 23  | 1811  | 23  | 0.276091 |
| 11UPR04_78.FIN2  | 364   | 1.567 | 0.754  | 0.037  | 0.0849  | 0.0031  | 0.73335 | 567   | 21  | 527   | 18  | 785  | 50  | 527   | 18  | 7.054674 |
| 11UPR04_79.FIN2  | 86    | 0.693 | 5.41   | 0.1    | 0.3427  | 0.0064  | 0.47934 | 1888  | 16  | 1898  | 31  | 1888 | 17  | 1888  | 17  | 0.529661 |
| 11UPR04_80.FIN2  | 69.8  | 0.873 | 2.18   | 0.057  | 0.1941  | 0.005   | 0.55048 | 1178  | 19  | 1143  | 27  | 1244 | 28  | 1143  | 27  | 2.971138 |
| 11UPR04_81.FIN2  | 332.8 | 0.49  | 3.332  | 0.055  | 0.2352  | 0.0047  | 0.60633 | 1487  | 13  | 1361  | 25  | 1676 | 16  | 1676  | 16  | 18.79475 |
| 11UPR04_82.FIN2  | 306   | 4.07  | 0.446  | 0.01   | 0.06    | 0.0011  | 0.4091  | 376.2 | 7   | 375.6 | 6.7 | 391  | 27  | 375.6 | 6.7 | 0.15949  |
| 11UPR04_83.FIN2  | 107.6 | 1.848 | 1.886  | 0.038  | 0.1841  | 0.0038  | 0.5013  | 1074  | 13  | 1089  | 20  | 1052 | 21  | 1089  | 20  | 1.396648 |
| 11UPR04_84.FIN2  | 322   | 1.163 | 4.151  | 0.069  | 0.2919  | 0.006   | 0.65965 | 1663  | 14  | 1650  | 30  | 1688 | 17  | 1688  | 17  | 2.251185 |
| 11UPR04_85.FIN2  | 344   | 0.38  | 1.515  | 0.029  | 0.154   | 0.0032  | 0.62149 | 938   | 12  | 923   | 18  | 967  | 22  | 923   | 18  | 1.599147 |
| 11UPR04_86.FIN2  | 253   | 1.117 | 0.603  | 0.012  | 0.0701  | 0.0017  | 0.40472 | 478.5 | 7.7 | 436   | 10  | 666  | 35  | 436   | 10  | 8.881923 |
| 11UPR04_87.FIN2  | 629   | 1.334 | 0.1719 | 0.0035 | 0.02523 | 0.00056 | 0.32129 | 161   | 3.1 | 160.6 | 3.5 | 218  | 33  | 160.6 | 3.5 | 0.248447 |
| 11UPR04_88.FIN2  | 76.6  | 0.457 | 0.843  | 0.022  | 0.1001  | 0.0021  | 0.22186 | 621   | 12  | 615   | 12  | 653  | 36  | 615   | 12  | 0.966184 |
| 11UPR04_89.FIN2  | 251   | 2.94  | 4.253  | 0.075  | 0.3008  | 0.007   | 0.56953 | 1683  | 15  | 1694  | 35  | 1681 | 24  | 1681  | 24  | 0.773349 |
| 11UPR04_90.FIN2  | 136.1 | 1.534 | 2.506  | 0.049  | 0.2194  | 0.0052  | 0.57097 | 1272  | 14  | 1282  | 27  | 1287 | 25  | 1287  | 25  | 0.3885   |
| 11UPR04_91.FIN2  | 50.8  | 0.811 | 1.045  | 0.027  | 0.1189  | 0.0031  | 0.28156 | 730   | 13  | 724   | 18  | 747  | 41  | 724   | 18  | 0.821918 |
| 11UPR04_92.FIN2  | 55.9  | 1.866 | 3.721  | 0.077  | 0.2625  | 0.0053  | 0.33933 | 1578  | 17  | 1502  | 27  | 1666 | 24  | 1666  | 24  | 9.843938 |
| 11UPR04_93.FIN2  | 86.9  | 1.251 | 3.543  | 0.077  | 0.27    | 0.0053  | 0.59098 | 1536  | 17  | 1540  | 27  | 1508 | 18  | 1508  | 18  | 2.122016 |
| 11UPR04_94.FIN2  | 195.6 | 1.386 | 0.5    | 0.011  | 0.0655  | 0.0016  | 0.44587 | 411.2 | 7.2 | 408.6 | 9.6 | 445  | 27  | 408.6 | 9.6 | 0.632296 |
| 11UPR04_95.FIN2  | 359   | 9.4   | 1.565  | 0.051  | 0.1561  | 0.0079  | 0.68823 | 955   | 20  | 934   | 44  | 1052 | 51  | 934   | 44  | 2.198953 |
| 11UPR04_96.FIN2  | 84.5  | 1.764 | 4.242  | 0.064  | 0.291   | 0.0062  | 0.61282 | 1683  | 13  | 1645  | 31  | 1736 | 17  | 1736  | 17  | 5.241935 |
| 11UPR04_97.FIN2  | 296   | 1.212 | 0.746  | 0.014  | 0.0892  | 0.002   | 0.56375 | 565.2 | 8.2 | 550   | 12  | 635  | 27  | 550   | 12  | 2.689314 |
| 11UPR04_98.FIN2  | 189   | 1.068 | 0.93   | 0.019  | 0.1078  | 0.0027  | 0.44505 | 668   | 10  | 660   | 16  | 715  | 28  | 660   | 16  | 1.197605 |
| 11UPR04_99.FIN2  | 49.5  | 0.791 | 3.798  | 0.082  | 0.2778  | 0.0073  | 0.55699 | 1594  | 17  | 1578  | 37  | 1634 | 23  | 1634  | 23  | 3.427173 |
| 11UPR04_100.FIN2 | 58.5  | 0.882 | 2.608  | 0.068  | 0.2154  | 0.0055  | 0.57245 | 1302  | 19  | 1256  | 29  | 1391 | 24  | 1391  | 24  | 9.705248 |
| 11UPR04_101.FIN2 | 90.9  | 0.759 | 4.138  | 0.073  | 0.2912  | 0.0063  | 0.68803 | 1662  | 15  | 1650  | 31  | 1694 | 15  | 1694  | 15  | 2.597403 |
| 11UPR04_102.FIN2 | 284   | 0.928 | 0.554  | 0.013  | 0.0705  | 0.0018  | 0.60136 | 446.7 | 8.6 | 439   | 11  | 482  | 32  | 439   | 11  | 1.723752 |
| 11UPR04_103.FIN2 | 61    | 0.641 | 1.883  | 0.049  | 0.1768  | 0.0039  | 0.45635 | 1072  | 17  | 1049  | 21  | 1112 | 37  | 1049  | 21  | 2.145522 |
| 11UPR04_104.FIN2 | 213   | 1.013 | 4.33   | 0.13   | 0.303   | 0.0068  | 0.38187 | 1693  | 24  | 1705  | 34  | 1673 | 29  | 1673  | 29  | 1.912732 |
| 11UPR04_105.FIN2 | 84.6  | 0.933 | 3.86   | 0.069  | 0.2744  | 0.0051  | 0.38816 | 1603  | 14  | 1562  | 26  | 1658 | 22  | 1658  | 22  | 5.790109 |
| 11UPR04_106.FIN2 | 434   | 4.31  | 0.913  | 0.019  | 0.1037  | 0.0019  | 0.45239 | 657.7 | 9.9 | 636   | 11  | 717  | 27  | 636   | 11  | 3.299377 |
| 11UPR04_107.FIN2 | 70.4  | 1.431 | 2.081  | 0.047  | 0.1954  | 0.0045  | 0.29844 | 1142  | 15  | 1150  | 24  | 1129 | 30  | 1150  | 24  | 0.700525 |
| 11UPR04_108.FIN2 | 123   | 1.209 | 4.868  | 0.085  | 0.3231  | 0.0059  | 0.60073 | 1797  | 14  | 1807  | 29  | 1811 | 16  | 1811  | 16  | 0.220872 |
| 11UPR04_109.FIN2 | 160   | 1.18  | 4.217  | 0.074  | 0.3015  | 0.0058  | 0.5924  | 1675  | 14  | 1701  | 28  | 1654 | 19  | 1654  | 19  | 2.841596 |
| 11UPR04_110.FIN2 | 226   | 0.909 | 15.29  | 0.29   | 0.555   | 0.012   | 0.79559 | 2830  | 18  | 2848  | 49  | 2821 | 14  | 2821  | 14  | 0.957107 |
| 11UPR04_111.FIN2 | 95    | 0.783 | 3.726  | 0.063  |         |         |         |       |     |       |     |      |     |       |     |          |

|                 |       |       |        |        |         |         |          |        |     |        |     |      |     |        |     |          |
|-----------------|-------|-------|--------|--------|---------|---------|----------|--------|-----|--------|-----|------|-----|--------|-----|----------|
| 11UPROS_6.FIN2  | 200.3 | 1.502 | 3.882  | 0.044  | 0.2637  | 0.0023  | 0.44097  | 1610.4 | 9.4 | 1508   | 12  | 1751 | 20  | 1751   | 20  | 13.87778 |
| 11UPROS_7.FIN2  | 182.8 | 1.874 | 2.27   | 0.029  | 0.2074  | 0.0029  | 0.70693  | 1203.8 | 8.8 | 1215   | 15  | 1177 | 23  | 1177   | 15  | 0.930387 |
| 11UPROS_8.FIN2  | 248   | 1.86  | 1.541  | 0.025  | 0.1559  | 0.0024  | 0.56173  | 947.5  | 9.8 | 934    | 13  | 990  | 32  | 934    | 13  | 1.424802 |
| 11UPROS_9.FIN2  | 124   | 2.898 | 3.426  | 0.079  | 0.2634  | 0.0069  | 0.71242  | 1508   | 18  | 1512   | 34  | 1492 | 36  | 1492   | 36  | 1.340483 |
| 11UPROS_10.FIN2 | 165.1 | 1.922 | 1.954  | 0.025  | 0.1859  | 0.0027  | 0.55138  | 1099.1 | 8.7 | 1099   | 15  | 1111 | 30  | 1099   | 15  | 0.009098 |
| 11UPROS_11.FIN2 | 128.7 | 0.799 | 2.634  | 0.038  | 0.2229  | 0.0029  | 0.48127  | 1312   | 10  | 1297   | 15  | 1343 | 26  | 1343   | 26  | 3.425168 |
| 11UPROS_12.FIN2 | 106   | 2.45  | 0.524  | 0.015  | 0.0679  | 0.0013  | 0.22231  | 426    | 10  | 423.4  | 7.7 | 453  | 70  | 423.4  | 7.7 | 0.610329 |
| 11UPROS_13.FIN2 | 237.8 | 0.833 | 0.4497 | 0.0096 | 0.0594  | 0.00061 | 0.32897  | 376.7  | 6.7 | 372    | 3.7 | 392  | 50  | 372    | 3.7 | 1.247677 |
| 11UPROS_14.FIN2 | 160   | 4.19  | 2.029  | 0.04   | 0.1844  | 0.0036  | 0.69491  | 1124   | 13  | 1093   | 19  | 1184 | 32  | 1093   | 19  | 2.758007 |
| 11UPROS_16.FIN2 | 626   | 4     | 4.134  | 0.041  | 0.2813  | 0.0036  | 0.7429   | 1660.6 | 8.1 | 1598   | 18  | 1739 | 16  | 1739   | 16  | 8.108108 |
| 11UPROS_17.FIN2 | 283   | 2.503 | 3.786  | 0.056  | 0.2691  | 0.0047  | 0.76383  | 1590   | 12  | 1535   | 24  | 1675 | 21  | 1675   | 21  | 8.358209 |
| 11UPROS_19.FIN2 | 118.5 | 2.544 | 3.531  | 0.074  | 0.2624  | 0.0059  | 0.60481  | 1534   | 16  | 1501   | 30  | 1570 | 40  | 1570   | 40  | 4.394904 |
| 11UPROS_20.FIN2 | 119   | 1.566 | 5.259  | 0.062  | 0.3357  | 0.0036  | 0.51859  | 1863   | 10  | 1865   | 17  | 1866 | 21  | 1866   | 21  | 0.053591 |
| 11UPROS_21.FIN2 | 755   | 11.1  | 1.716  | 0.018  | 0.1723  | 0.0022  | 0.74871  | 1014   | 6.7 | 1024   | 12  | 996  | 16  | 1024   | 12  | 0.986193 |
| 11UPROS_22.FIN2 | 44.2  | 1.003 | 4.386  | 0.097  | 0.294   | 0.0065  | 0.78283  | 1712   | 19  | 1660   | 32  | 1779 | 30  | 1779   | 30  | 6.689151 |
| 11UPROS_23.FIN2 | 60.7  | 1.654 | 0.764  | 0.066  | 0.0847  | 0.0036  | 0.6323   | 581    | 39  | 524    | 21  | 810  | 160 | 524    | 21  | 9.810671 |
| 11UPROS_24.FIN2 | 460   | 1.257 | 0.5123 | 0.0077 | 0.06691 | 0.00069 | 0.32748  | 419.8  | 5.2 | 417.5  | 4.2 | 433  | 34  | 417.5  | 4.2 | 0.54788  |
| 11UPROS_25.FIN2 | 317   | 3.24  | 0.937  | 0.016  | 0.1075  | 0.0017  | 0.46792  | 672    | 8.8 | 659.2  | 9.9 | 729  | 34  | 659.2  | 9.9 | 1.904762 |
| 11UPROS_26.FIN2 | 118.5 | 1.743 | 3.08   | 0.05   | 0.2367  | 0.0036  | 0.38224  | 1427   | 12  | 1369   | 19  | 1498 | 32  | 1498   | 32  | 8.611482 |
| 11UPROS_27.FIN2 | 741   | 19.2  | 0.765  | 0.012  | 0.0895  | 0.0016  | 0.789    | 578.4  | 7   | 552.4  | 9.7 | 689  | 25  | 552.4  | 9.7 | 4.495159 |
| 11UPROS_28.FIN2 | 96.8  | 1.306 | 5.136  | 0.089  | 0.325   | 0.0059  | 0.65536  | 1842   | 15  | 1813   | 29  | 1872 | 25  | 1872   | 25  | 3.151709 |
| 11UPROS_29.FIN2 | 89.9  | 1.275 | 3.287  | 0.049  | 0.2561  | 0.0052  | 0.54335  | 1477   | 12  | 1469   | 27  | 1500 | 36  | 1500   | 36  | 2.066667 |
| 11UPROS_30.FIN2 | 205.9 | 259   | 1.643  | 0.035  | 0.1649  | 0.004   | 0.49739  | 985    | 13  | 983    | 22  | 1012 | 41  | 983    | 22  | 0.203046 |
| 11UPROS_31.FIN2 | 351   | 2.71  | 0.526  | 0.013  | 0.0653  | 0.0014  | 0.57519  | 428.9  | 8.4 | 407.9  | 8.6 | 549  | 47  | 407.9  | 8.6 | 4.896246 |
| 11UPROS_32.FIN2 | 75.7  | 2.273 | 1.733  | 0.033  | 0.1771  | 0.002   | 0.20202  | 1020   | 12  | 1051   | 11  | 967  | 42  | 1051   | 11  | 3.039216 |
| 11UPROS_33.FIN2 | 157   | 2.244 | 1.54   | 0.038  | 0.1518  | 0.0041  | 0.77865  | 945    | 15  | 911    | 23  | 1047 | 30  | 911    | 23  | 3.597884 |
| 11UPROS_34.FIN2 | 158.3 | 1.492 | 3.9    | 0.1    | 0.279   | 0.0072  | 0.93786  | 1612   | 22  | 1586   | 37  | 1656 | 29  | 1656   | 29  | 4.227053 |
| 11UPROS_35.FIN2 | 216   | 1.944 | 2.147  | 0.027  | 0.201   | 0.0028  | 0.31851  | 1163.3 | 8.8 | 1180   | 15  | 1138 | 30  | 1180   | 15  | 1.435571 |
| 11UPROS_36.FIN2 | 324   | 1.016 | 0.857  | 0.013  | 0.1024  | 0.0011  | 0.29572  | 627.7  | 7.2 | 628.2  | 6.7 | 629  | 33  | 628.2  | 6.7 | 0.079656 |
| 11UPROS_37.FIN2 | 269   | 1.73  | 3.686  | 0.082  | 0.2567  | 0.0068  | 0.8277   | 1566   | 18  | 1471   | 35  | 1715 | 32  | 1715   | 32  | 14.22741 |
| 11UPROS_38.FIN2 | 541   | 2.162 | 4.213  | 0.036  | 0.2941  | 0.0027  | 0.71765  | 1678.2 | 6.6 | 1662   | 13  | 1695 | 13  | 1695   | 13  | 1.946903 |
| 11UPROS_39.FIN2 | 108.6 | 1.062 | 9.05   | 0.11   | 0.4355  | 0.0065  | 0.62023  | 2344   | 11  | 2329   | 29  | 2342 | 21  | 2342   | 21  | 0.555081 |
| 11UPROS_40.FIN2 | 196   | 2.178 | 2.084  | 0.037  | 0.1899  | 0.0032  | 0.55168  | 1142   | 12  | 1120   | 17  | 1184 | 31  | 1120   | 17  | 1.926445 |
| 11UPROS_41.FIN2 | 42.9  | 0.852 | 10.61  | 0.19   | 0.4196  | 0.007   | 0.54991  | 2496   | 17  | 2258   | 32  | 2706 | 27  | 2706   | 27  | 16.5558  |
| 11UPROS_42.FIN2 | 428   | 2.113 | 0.5397 | 0.0075 | 0.07101 | 0.00062 | 0.42432  | 438.6  | 4.9 | 442.2  | 3.8 | 421  | 26  | 442.2  | 3.8 | 0.820793 |
| 11UPROS_43.FIN2 | 72.9  | 1.035 | 5.042  | 0.095  | 0.3258  | 0.005   | 0.8403   | 1826   | 16  | 1820   | 25  | 1813 | 23  | 1813   | 23  | 0.3861   |
| 11UPROS_44.FIN2 | 100.6 | 1.334 | 1.063  | 0.019  | 0.1176  | 0.0017  | 0.18931  | 734.3  | 9.6 | 716.4  | 9.8 | 777  | 43  | 716.4  | 9.8 | 2.437696 |
| 11UPROS_45.FIN2 | 328   | 2.68  | 4.621  | 0.064  | 0.3091  | 0.0039  | 0.49756  | 1753   | 11  | 1735   | 19  | 1769 | 19  | 1769   | 19  | 1.92199  |
| 11UPROS_46.FIN2 | 266   | 2.162 | 2.566  | 0.041  | 0.2122  | 0.0029  | 0.71561  | 1294   | 12  | 1243   | 16  | 1385 | 23  | 1385   | 23  | 10.25271 |
| 11UPROS_47.FIN2 | 228   | 2.07  | 3.783  | 0.098  | 0.2635  | 0.0063  | 0.61658  | 1588   | 21  | 1506   | 32  | 1692 | 38  | 1692   | 38  | 10.99291 |
| 11UPROS_48.FIN2 | 367   | 1.016 | 0.733  | 0.01   | 0.0877  | 0.0011  | 0.42295  | 557.8  | 6.1 | 542.1  | 6.4 | 611  | 32  | 542.1  | 6.4 | 2.814629 |
| 11UPROS_49.FIN2 | 552   | 1.59  | 0.5398 | 0.0093 | 0.06993 | 0.00082 | 0.52449  | 438.6  | 6.2 | 435.7  | 4.9 | 463  | 33  | 435.7  | 4.9 | 0.661195 |
| 11UPROS_50.FIN2 | 118.3 | 1.434 | 5.497  | 0.057  | 0.3374  | 0.0033  | 0.43786  | 1899.5 | 9   | 1874   | 16  | 1933 | 19  | 1933   | 19  | 3.05225  |
| 11UPROS_51.FIN2 | 281.9 | 3.17  | 2.387  | 0.046  | 0.1938  | 0.003   | 0.59147  | 1237   | 14  | 1143   | 17  | 1414 | 29  | 1143   | 17  | 7.59903  |
| 11UPROS_52.FIN2 | 348.1 | 2.144 | 9.565  | 0.068  | 0.4406  | 0.004   | 0.6431   | 2394.4 | 6.8 | 2353   | 18  | 2435 | 12  | 2435   | 12  | 3.367556 |
| 11UPROS_53.FIN2 | 52.44 | 0.781 | 0.084  | 0.017  | 0.0121  | 0.0011  | 0.095765 | 81     | 16  | 77.8   | 7.3 | 210  | 400 | 77.8   | 7.3 | 3.950617 |
| 11UPROS_54.FIN2 | 87.7  | 1.535 | 1.413  | 0.032  | 0.1471  | 0.003   | 0.34401  | 894    | 13  | 884    | 17  | 903  | 53  | 884    | 17  | 1.118568 |
| 11UPROS_55.FIN2 | 415   | 3.199 | 4.512  | 0.032  | 0.3039  | 0.0024  | 0.56311  | 1732.8 | 5.9 | 1710   | 12  | 1755 | 12  | 1755   | 12  | 2.564103 |
| 11UPROS_56.FIN2 | 554   | 2.655 | 0.5275 | 0.0065 | 0.06774 | 0.00069 | 0.27701  | 430    | 4.3 | 422.5  | 4.2 | 476  | 33  | 422.5  | 4.2 | 1.744186 |
| 11UPROS_57.FIN2 | 297   | 2.307 | 2.043  | 0.019  | 0.1924  | 0.0018  | 0.45778  | 1130.6 | 6.5 | 1134.4 | 9.6 | 1123 | 20  | 1134.4 | 9.6 | 0.336105 |
| 11UPROS_58.FIN2 | 115.2 | 1.579 | 0.493  | 0.012  | 0.06399 | 0.00092 | 0.080302 | 406.3  | 8.3 | 399.8  | 5.6 | 453  | 64  | 399.8  | 5.6 | 1.599803 |
| 11UPROS_59.FIN2 | 1350  | 1.43  | 0.701  | 0.024  | 0.073   | 0.0031  | 0.86056  | 542    | 14  | 454    | 19  | 921  | 41  | 454    | 19  | 16.23616 |
| 11UPROS_60.FIN2 | 521   | 1.746 | 0.1151 | 0.0035 | 0.01636 | 0.00032 | 0.23397  | 110.6  | 3.2 | 104.6  | 2   | 281  | 70  | 104.6  | 2   | 5.424955 |
| 11UPROS_61.FIN2 | 490   | 2.573 | 4.323  | 0.059  | 0.285   | 0.003   | 0.49684  | 1698   | 11  | 1616   | 15  | 1801 | 23  | 1801   | 23  | 10.27207 |
| 11UPROS_62.FIN2 | 168.2 | 2.523 | 1.741  | 0.023  | 0.1691  | 0.002   | 0.40596  | 1023.4 | 8.6 | 1007   | 11  | 1066 | 31  | 1007   | 11  | 1.602501 |
| 11UPROS_63.FIN2 | 391.9 | 1.299 | 3.932  | 0.044  | 0.2831  | 0.0029  | 0.65946  | 1621   | 9   | 1607   | 14  | 1648 | 17  | 1648   | 17  | 2.487864 |
| 11UPROS_64.FIN2 | 381   | 2.659 | 1.912  | 0.018  | 0.1822  | 0.0018  | 0.32962  | 1084.7 | 6.4 | 1079.1 | 9.6 | 1105 | 22  | 1079.1 | 9.6 | 0.516272 |
| 11UPROS_65.FIN2 | 194.5 | 1     | 0.4465 | 0.0089 | 0.06005 | 0.00087 | 0.31816  | 374.4  | 6.2 | 375.9  | 5.3 | 364  | 51  | 375.9  | 5.3 | 0.400641 |
| 11UPROS_66.FIN2 | 199   | 2.254 | 0.631  | 0.012  | 0.07945 | 0.00099 | 0.3417   | 496    | 7.6 | 492.8  | 5.9 | 514  | 46  | 492.8  | 5.9 | 0.645161 |
| 11UPROS_67.FIN2 | 243   | 4.65  | 2.162  | 0.056  | 0.2004  | 0.0042  | 0.87663  | 1166   | 18  | 1177   | 22  | 1165 | 24  | 1177   | 22  | 0.943396 |
| 11UPROS_68.FIN2 | 235   | 3.68  | 2.112  | 0.026  | 0.1944  | 0.0025  | 0.44885  | 1154.6 | 8.6 | 1147   | 14  | 1163 | 27  | 1147   | 14  | 0.658237 |
| 11UPROS_69.FIN2 | 517   | 1.349 | 0.096  | 0.0027 | 0.01456 | 0.00024 | 0.035175 | 93     | 2.5 | 93.2   | 1.5 | 129  | 66  | 93.2   | 1.5 | 0.215054 |
| 11UPROS_70.FIN2 | 82.5  | 2.318 | 2.67   | 0.041  | 0.2252  | 0.0031  | 0.34623  | 1320   | 12  | 1309   | 16  | 1339 | 34  | 1339   | 34  | 2.240478 |
| 11UPROS_71.FIN2 | 241.6 | 0.892 | 5.554  | 0.058  | 0.3258  | 0.0035  | 0.50233  | 1909.4 | 8.8 | 1818   | 17  | 1992 | 23  | 1992   | 23  | 8.73494  |
| 11UPROS_72.FIN2 | 367   | 2.4   | 1.695  | 0.018  | 0.161   | 0.0023  | 0.54881  | 1006.2 | 7   | 962    | 13  | 1091 | 27  | 962    | 13  | 4.392765 |
| 11UPROS_73.FIN2 | 260   | 1.26  | 6.169  | 0.046  | 0.359   | 0.0028  | 0.44961  | 2000.5 | 6.6 | 1979   | 14  | 2012 | 14  | 2012   | 14  | 1.640159 |
| 11UPROS_74.FIN2 | 424   | 1.78  | 0.513  | 0.0079 | 0.06552 | 0.00061 | 0.27342  | 420.2  | 5.3 | 409.1  | 3.7 | 482  | 34  | 409.1  | 3.7 | 2.641599 |
| 11UPROS_75.FIN2 | 194   | 3.14  | 2.832  | 0.044  | 0.2214  | 0.0037  | 0.62115  | 1368   | 12  | 1289   | 19  | 1505 | 24  | 1505   | 24  | 14.35216 |
| 11UPROS_76.FIN2 | 481   | 1.669 | 0.2054 | 0.0042 | 0.02783 | 0.00039 | 0.23598  | 189.5  | 3.6 | 176.9  | 2.5 | 341  | 51  | 176.9  | 2.5 | 6.649077 |
| 11UPROS_77.FIN2 | 513   | 11.2  | 0.451  | 0.018  | 0.0581  | 0.0023  | 0.84027  | 380    | 12  | 364    | 14  | 466  | 48  | 364    | 14  | 4.210526 |
| 11UPROS_77.FIN2 | 269   | 3.708 | 1.954  | 0.03   | 0.1756  | 0.0028  | 0.54407  | 1099   | 10  | 1043   | 15  | 1185 | 29  | 1043   | 15  | 5.095541 |
| 11UPROS_78.FIN2 | 332   | 6.48  | 3.795  | 0.06   | 0.2753  | 0.0051  | 0.72665  | 1590   | 13  | 1567   | 26  | 1628 | 24  | 1628   | 24  | 3.746929 |
| 11UPROS_79.FIN2 | 215   | 2.235 | 3.187  | 0.043  | 0.2406  | 0.0038  |          |        |     |        |     |      |     |        |     |          |



|                  |       |        |        |        |         |         |          |        |     |       |     |      |    |       |     |          |
|------------------|-------|--------|--------|--------|---------|---------|----------|--------|-----|-------|-----|------|----|-------|-----|----------|
| 11UPR05_96.FIN2  | 299   | 2.146  | 1.537  | 0.031  | 0.1259  | 0.0015  | 0.020545 | 944    | 12  | 764.6 | 8.6 | 1387 | 51 | 764.6 | 8.6 | 19.00424 |
| 11UPR05_97.FIN2  | 109.1 | 3.417  | 34.47  | 0.49   | 0.7316  | 0.0098  | 0.6529   | 3622   | 14  | 3538  | 37  | 3675 | 17 | 3675  | 17  | 3.727891 |
| 11UPR05_98.FIN2  | 112.5 | 1.619  | 2.495  | 0.031  | 0.2175  | 0.0024  | 0.42246  | 1270   | 9.1 | 1268  | 13  | 1267 | 27 | 1267  | 27  | 0.078927 |
| 11UPR05_99.FIN2  | 249   | 1.61   | 0.574  | 0.011  | 0.075   | 0.0011  | 0.55029  | 460.2  | 7   | 465.9 | 6.8 | 459  | 35 | 465.9 | 6.8 | 1.238592 |
| 11UPR05_100.FIN2 | 169   | 1.389  | 4.615  | 0.067  | 0.2824  | 0.0044  | 0.75622  | 1755   | 12  | 1603  | 22  | 1945 | 21 | 1945  | 21  | 17.58355 |
| 11UPR05_101.FIN2 | 620   | 2.124  | 3.237  | 0.039  | 0.2491  | 0.0036  | 0.72543  | 1465.4 | 9.4 | 1436  | 19  | 1514 | 19 | 1514  | 19  | 5.151915 |
| 11UPR05_102.FIN2 | 180   | 2      | 4.251  | 0.069  | 0.2847  | 0.0059  | 0.69355  | 1682   | 13  | 1614  | 30  | 1754 | 29 | 1754  | 29  | 7.981756 |
| 11UPR05_103.FIN2 | 56.6  | 0.4827 | 13.07  | 0.18   | 0.5063  | 0.0061  | 0.49567  | 2684   | 13  | 2640  | 26  | 2712 | 18 | 2712  | 18  | 2.654867 |
| 11UPR05_104.FIN2 | 865   | 2.536  | 0.3377 | 0.0092 | 0.04213 | 0.00063 | 0.040248 | 295.1  | 6.9 | 266   | 3.9 | 514  | 62 | 266   | 3.9 | 9.861064 |
| 11UPR05_105.FIN2 | 333.1 | 2.881  | 2.791  | 0.034  | 0.2267  | 0.0022  | 0.65894  | 1352.5 | 9   | 1317  | 11  | 1396 | 18 | 1396  | 18  | 5.659026 |
| 11UPR05_106.FIN2 | 142.7 | 1.78   | 0.714  | 0.015  | 0.0838  | 0.0016  | 0.35835  | 548    | 9.2 | 518.6 | 9.2 | 662  | 48 | 518.6 | 9.2 | 5.364964 |
| 11UPR05_107.FIN2 | 92    | 1.626  | 3.076  | 0.071  | 0.2263  | 0.0049  | 0.30538  | 1425   | 18  | 1315  | 26  | 1627 | 42 | 1627  | 42  | 19.1764  |
| 11UPR05_107.FIN2 | 49.26 | 1.213  | 3.835  | 0.078  | 0.2758  | 0.0074  | 0.32878  | 1603   | 17  | 1569  | 38  | 1655 | 56 | 1655  | 56  | 5.196375 |
| 11UPR05_108.FIN2 | 106.7 | 1.794  | 2.193  | 0.037  | 0.2005  | 0.0022  | 0.39384  | 1180   | 11  | 1178  | 12  | 1156 | 32 | 1178  | 12  | 0.169492 |
| 11UPR05_109.FIN2 | 111.5 | 1.353  | 3.972  | 0.052  | 0.2906  | 0.0035  | 0.25361  | 1627   | 10  | 1644  | 17  | 1603 | 29 | 1603  | 29  | 2.557704 |
| 11UPR05_110.FIN2 | 330.4 | 1.686  | 4.277  | 0.042  | 0.3055  | 0.0024  | 0.7209   | 1688.4 | 8   | 1719  | 12  | 1651 | 14 | 1651  | 14  | 4.118716 |
| 11UPR05_111.FIN2 | 100.7 | 0.825  | 1.639  | 0.027  | 0.1627  | 0.0025  | 0.37815  | 984    | 10  | 971   | 14  | 1016 | 37 | 971   | 14  | 1.321138 |
| 11UPR05_112.FIN2 | 25.07 | 0.993  | 1.799  | 0.086  | 0.1711  | 0.0048  | 0.086277 | 1050   | 29  | 1018  | 26  | 1069 | 95 | 1018  | 26  | 3.047619 |
| 11UPR05_113.FIN2 | 74.3  | 1.181  | 3.394  | 0.066  | 0.2665  | 0.0047  | 0.58701  | 1504   | 15  | 1522  | 24  | 1480 | 33 | 1480  | 33  | 2.837838 |
| 11UPR05_114.FIN2 | 47.1  | 0.95   | 0.894  | 0.022  | 0.1048  | 0.0022  | 0.045523 | 649    | 12  | 642   | 13  | 658  | 72 | 642   | 13  | 1.078582 |
| 11UPR05_115.FIN2 | 34.3  | 0.745  | 1.788  | 0.04   | 0.1693  | 0.0034  | 0.34224  | 1041   | 15  | 1008  | 19  | 1128 | 44 | 1008  | 19  | 3.170029 |
| 11UPR05_116.FIN2 | 213.4 | 2.012  | 9.73   | 0.2    | 0.4158  | 0.0083  | 0.78875  | 2408   | 19  | 2240  | 38  | 2539 | 23 | 2539  | 23  | 11.77629 |
| 11UPR05_117.FIN2 | 221   | 2.53   | 0.537  | 0.016  | 0.0694  | 0.0025  | 0.50579  | 436    | 10  | 432   | 15  | 434  | 79 | 432   | 15  | 0.917431 |
| 11UPR05_118.FIN2 | 107.9 | 1.812  | 0.28   | 0.012  | 0.0371  | 0.001   | 0.25149  | 249.9  | 9.2 | 234.9 | 6.3 | 374  | 98 | 234.9 | 6.3 | 6.002401 |
| 11UPR05_119.FIN2 | 404   | 45.7   | 5.42   | 0.13   | 0.3276  | 0.0046  | 0.51301  | 1888   | 21  | 1826  | 22  | 1950 | 38 | 1950  | 38  | 6.358974 |

|                 |       |       |        |        |         |         |          |        |     |        |     |        |     |        |      |          |
|-----------------|-------|-------|--------|--------|---------|---------|----------|--------|-----|--------|-----|--------|-----|--------|------|----------|
| 11UPR06_1.FIN2  | 467   | 3.46  | 10.66  | 0.37   | 0.38    | 0.012   | 0.94197  | 2488   | 33  | 2078   | 57  | 2851   | 14  | 2851   | 14   | 27.11329 |
| 11UPR06_2.FIN2  | 76.4  | 0.922 | 2.174  | 0.032  | 0.2012  | 0.0027  | 0.4941   | 1172   | 10  | 1183   | 15  | 1174   | 17  | 1183   | 15   | 0.938567 |
| 11UPR06_3.FIN2  | 166   | 2.81  | 4.474  | 0.062  | 0.3011  | 0.0044  | 0.83958  | 1727   | 11  | 1696   | 22  | 1780   | 12  | 1780   | 12   | 4.719101 |
| 11UPR06_4.FIN2  | 97.8  | 0.707 | 0.861  | 0.018  | 0.1016  | 0.0016  | 0.20783  | 631    | 10  | 623.8  | 9.1 | 662    | 33  | 623.8  | 9.1  | 1.141046 |
| 11UPR06_5.FIN2  | 331   | 1.631 | 1.693  | 0.032  | 0.1571  | 0.0029  | 0.86563  | 1005   | 12  | 940    | 16  | 1143   | 12  | 940    | 16   | 6.467662 |
| 11UPR06_6.FIN2  | 60.4  | 1.258 | 6.124  | 0.087  | 0.3481  | 0.0054  | 0.69198  | 1992   | 12  | 1925   | 26  | 2064   | 13  | 2064   | 13   | 6.734496 |
| 11UPR06_7.FIN2  | 770   | 1.97  | 3.607  | 0.064  | 0.2564  | 0.005   | 0.92522  | 1549   | 14  | 1471   | 26  | 1666.4 | 8.4 | 1666.4 | 8.4  | 11.72588 |
| 11UPR06_8.FIN2  | 234.5 | 1.082 | 1.556  | 0.039  | 0.147   | 0.0039  | 0.61868  | 956    | 15  | 884    | 22  | 1117   | 26  | 884    | 22   | 7.531381 |
| 11UPR06_9.FIN2  | 83.5  | 1.98  | 1.892  | 0.028  | 0.179   | 0.0021  | 0.56455  | 1080.1 | 9.8 | 1061   | 11  | 1107   | 16  | 1061   | 11   | 1.768355 |
| 11UPR06_10.FIN2 | 78.8  | 0.941 | 3.893  | 0.067  | 0.2883  | 0.0053  | 0.73724  | 1611   | 14  | 1632   | 27  | 1594   | 17  | 1594   | 17   | 2.38394  |
| 11UPR06_11.FIN2 | 298   | 2.85  | 1.814  | 0.018  | 0.1791  | 0.0013  | 0.54837  | 1050.2 | 6.6 | 1062.2 | 7.1 | 1028   | 12  | 1062.2 | 7.1  | 1.142639 |
| 11UPR06_12.FIN2 | 67.2  | 1.31  | 3.576  | 0.046  | 0.2799  | 0.0046  | 0.58047  | 1545   | 10  | 1590   | 23  | 1509   | 19  | 1509   | 19   | 5.367793 |
| 11UPR06_13.FIN2 | 170.1 | 1.39  | 0.919  | 0.013  | 0.10711 | 0.00099 | 0.37278  | 662.4  | 6.7 | 655.9  | 5.8 | 674    | 17  | 655.9  | 5.8  | 0.98128  |
| 11UPR06_14.FIN2 | 65.7  | 1.336 | 3.388  | 0.046  | 0.263   | 0.0032  | 0.62191  | 1503   | 11  | 1505   | 16  | 1503   | 11  | 1503   | 11   | 0.133067 |
| 11UPR06_15.FIN2 | 339   | 1.562 | 0.0969 | 0.0021 | 0.01468 | 0.00018 | 0.072459 | 93.8   | 1.9 | 93.9   | 1.2 | 156    | 22  | 93.9   | 1.2  | 0.10661  |
| 11UPR06_16.FIN2 | 247.4 | 1.641 | 2.824  | 0.027  | 0.2409  | 0.0021  | 0.66254  | 1362.6 | 7   | 1391   | 11  | 1315.4 | 7.6 | 1315.4 | 7.6  | 5.747301 |
| 11UPR06_17.FIN2 | 384   | 1.483 | 0.1012 | 0.0029 | 0.01532 | 0.00032 | 0.055403 | 97.8   | 2.7 | 98     | 2   | 209    | 42  | 98     | 2    | 0.204499 |
| 11UPR06_18.FIN2 | 633   | 2.91  | 2.848  | 0.029  | 0.2321  | 0.0024  | 0.81663  | 1367.6 | 7.8 | 1345   | 13  | 1412.4 | 7.3 | 1412.4 | 7.3  | 4.772019 |
| 11UPR06_19.FIN2 | 147.9 | 3.07  | 0.502  | 0.0098 | 0.06587 | 0.00085 | 0.22424  | 412.7  | 6.6 | 411.2  | 5.1 | 424    | 24  | 411.2  | 5.1  | 0.36346  |
| 11UPR06_20.FIN2 | 230   | 1.2   | 4.251  | 0.052  | 0.299   | 0.0032  | 0.72306  | 1683   | 10  | 1686   | 16  | 1676.8 | 9.1 | 1676.8 | 9.1  | 0.548664 |
| 11UPR06_21.FIN2 | 25.5  | 2.95  | 0.174  | 0.018  | 0.01939 | 0.00076 | 0.1468   | 161    | 15  | 123.7  | 4.8 | 920    | 110 | 123.7  | 4.8  | 23.1677  |
| 11UPR06_22.FIN2 | 75.5  | 3.91  | 11.32  | 0.13   | 0.47    | 0.0045  | 0.73875  | 2549   | 11  | 2483   | 20  | 2608.1 | 7.6 | 2608.1 | 7.6  | 4.796595 |
| 11UPR06_23.FIN2 | 104   | 1.38  | 4.203  | 0.042  | 0.2968  | 0.003   | 0.51894  | 1673.9 | 8.2 | 1675   | 15  | 1676   | 11  | 1676   | 11   | 0.059666 |
| 11UPR06_24.FIN2 | 135.4 | 0.56  | 0.4761 | 0.0095 | 0.06345 | 0.00059 | 0.15377  | 395    | 6.5 | 396.6  | 3.6 | 399    | 29  | 396.6  | 3.6  | 0.405063 |
| 11UPR06_25.FIN2 | 223   | 1.276 | 3.13   | 0.029  | 0.2525  | 0.0024  | 0.72333  | 1440.5 | 7   | 1451   | 12  | 1421.9 | 7   | 1421.9 | 7    | 2.046557 |
| 11UPR06_26.FIN2 | 14.5  | 0.801 | 0.757  | 0.036  | 0.0724  | 0.0027  | 0.41298  | 573    | 20  | 450    | 16  | 1144   | 54  | 450    | 16   | 21.46597 |
| 11UPR06_27.FIN2 | 148.6 | 1     | 3.22   | 0.029  | 0.2544  | 0.0021  | 0.47     | 1461.4 | 7   | 1461   | 11  | 1464.3 | 8.3 | 1464.3 | 8.3  | 0.225364 |
| 11UPR06_28.FIN2 | 163.3 | 1.183 | 11.38  | 0.1    | 0.4719  | 0.0037  | 0.70641  | 2555   | 8.4 | 2491   | 16  | 2605.8 | 6.5 | 2605.8 | 6.5  | 4.405557 |
| 11UPR06_29.FIN2 | 256   | 3.676 | 1.637  | 0.022  | 0.1633  | 0.0013  | 0.49652  | 983.8  | 8.4 | 974.8  | 7.4 | 1008   | 15  | 974.8  | 7.4  | 0.91482  |
| 11UPR06_30.FIN2 | 475   | 1.24  | 0.0936 | 0.0023 | 0.01387 | 0.00022 | 0.29016  | 90.8   | 2.1 | 88.8   | 1.4 | 211    | 29  | 88.8   | 1.4  | 2.202643 |
| 11UPR06_31.FIN2 | 301   | 1.659 | 2.021  | 0.043  | 0.181   | 0.0025  | 0.39032  | 1121   | 14  | 1072   | 13  | 1250   | 36  | 1072   | 13   | 4.371097 |
| 11UPR06_32.FIN2 | 373   | 1.048 | 0.0966 | 0.0032 | 0.0145  | 0.00025 | 0.2673   | 93.5   | 3   | 92.8   | 1.6 | 281    | 46  | 92.8   | 1.6  | 0.748663 |
| 11UPR06_33.FIN2 | 92.2  | 1.06  | 1.821  | 0.028  | 0.1799  | 0.0021  | 0.36397  | 1052   | 10  | 1067   | 11  | 1022   | 19  | 1067   | 11   | 1.425856 |
| 11UPR06_34.FIN2 | 622   | 1.962 | 3.462  | 0.078  | 0.2459  | 0.0047  | 0.88626  | 1518   | 18  | 1417   | 24  | 1654   | 13  | 1654   | 13   | 14.3289  |
| 11UPR06_35.FIN2 | 76.7  | 2.429 | 2.009  | 0.031  | 0.1913  | 0.0019  | 0.32112  | 1117   | 10  | 1128   | 10  | 1106   | 19  | 1128   | 10   | 0.984781 |
| 11UPR06_36.FIN2 | 54.3  | 1.956 | 2.07   | 0.041  | 0.1929  | 0.0034  | 0.53128  | 1137   | 14  | 1139   | 18  | 1115   | 23  | 1139   | 18   | 0.175901 |
| 11UPR06_37.FIN2 | 110.1 | 1.127 | 1.972  | 0.023  | 0.1819  | 0.002   | 0.35302  | 1106.5 | 7.7 | 1077   | 11  | 1152   | 18  | 1077   | 11   | 2.666064 |
| 11UPR06_38.FIN2 | 123.9 | 1.69  | 4.534  | 0.032  | 0.3171  | 0.0022  | 0.47845  | 1737.7 | 5.9 | 1775   | 11  | 1699.8 | 8.9 | 1699.8 | 8.9  | 4.42405  |
| 11UPR06_39.FIN2 | 382   | 1.072 | 0.0966 | 0.0028 | 0.01462 | 0.00018 | 0.027413 | 93.9   | 2.7 | 93.5   | 1.1 | 161    | 32  | 93.5   | 1.1  | 0.425985 |
| 11UPR06_40.FIN2 | 750   | 4.79  | 1.005  | 0.031  | 0.0758  | 0.0025  | 0.92419  | 705    | 16  | 471    | 15  | 1543   | 13  | DISC   | DISC | 33.19149 |
| 11UPR06_41.FIN2 | 606   | 4.05  | 0.428  | 0.02   | 0.0541  | 0.0029  | 0.93759  | 360    | 14  | 339    | 18  | 497    | 23  | 339    | 18   | 5.833333 |
| 11UPR06_42.FIN2 | 112.8 | 0.827 | 0.688  | 0.011  | 0.0865  | 0.001   | 0.21759  | 532.9  | 6.8 | 534.8  | 6.2 | 526    | 22  | 534.8  | 6.2  | 0.35654  |
| 11UPR06_43.FIN2 | 226   | 1.118 | 1.25   | 0.19   | 0.1026  | 0.0024  | 0.9698   | 756    | 64  | 630    | 14  | 1040   | 170 | 630    | 14   | 16.66667 |
| 11UPR06_44.FIN2 | 182   | 2.42  | 4.441  | 0.044  | 0.3089  | 0.0027  | 0.6215   | 1719.6 | 8.3 | 1735   | 14  | 1706   | 8.3 | 1706   | 8.3  | 1.699883 |
| 11UPR06_45.FIN2 | 123   | 1.336 | 2.424  | 0.025  | 0.2133  | 0.002   | 0.51237  | 1250.2 | 7.3 | 1246   | 11  | 1246   | 11  | 1246   | 11   | 0        |
| 11UPR06_46.FIN2 | 180   | 0.486 | 0.3669 | 0.0066 | 0.05043 | 0.00067 | 0.221    | 317.2  | 4.9 | 317.1  | 4.1 | 330    | 30  | 317.1  | 4.1  | 0.031526 |
| 11UPR06_47.FIN2 | 195.6 | 1.965 | 0.955  | 0.014  | 0.1127  | 0.0012  | 0.49392  | 680.5  | 7   | 688.5  | 6.8 | 667    | 16  | 688.5  | 6.8  | 1.175606 |
| 11UPR06_48.FIN2 | 139.7 | 2.423 | 4.872  | 0.051  | 0.326   | 0.0032  | 0.75543  | 1796.7 | 8.8 | 1819   | 16  | 1771   | 10  | 1771   | 10   | 2.710333 |
| 11UPR06_49.FIN2 | 173   | 1.228 | 0.543  | 0.021  | 0.06535 | 0.00098 | 0.61983  | 439    | 14  | 408    | 5.9 | 579    | 60  | 408    | 5.9  | 7.061503 |
| 11UPR06_50.FIN2 | 508   | 1.36  | 0.1676 | 0.0048 | 0.02478 | 0.00044 | 0.85869  | 157.2  | 4.2 | 157.8  | 2.8 | 216    | 25  | 157.8  | 2.8  | 0.381679 |
| 11UPR06_51.FIN2 | 112.7 | 1.484 | 4.731  | 0.043  | 0.32    | 0.0025  | 0.54453  | 1772.2 | 7.6 | 1791   | 12  | 1753.9 | 8.1 | 1753.9 | 8.1  | 2.115286 |
| 11UPR06_52.FIN2 | 46.7  | 2.33  | 0.733  | 0.019  | 0.0923  | 0.0014  | 0.028009 | 557    | 11  | 568.8  | 8.5 | 512    | 40  | 568.8  | 8.5  | 2.118492 |
| 11UPR06_53.FIN2 | 146   | 2.628 | 4.365  | 0.031  | 0.3039  | 0.0025  | 0.47269  | 1705.4 | 5.9 | 1711   | 12  | 1703.4 | 9.4 | 1703.4 | 9.4  | 0.446166 |
| 11UPR06_54.FIN2 | 571   | 1.534 | 1.998  | 0.026  | 0.1862  | 0.0027  | 0.77627  | 1114.4 | 8.6 | 1101   | 14  | 1133.4 | 9.9 | 1101   | 14   | 1.202441 |
| 11UPR06_55.FIN2 | 1030  | 2.07  | 0.0819 | 0.0057 | 0.01264 | 0.0007  | 0.89645  | 79.7   | 5.4 | 80.9   | 4.5 | 140    | 28  | 80.9   | 4.5  | 1.505646 |
| 11UPR06_56.FIN2 | 55.8  | 1.064 | 0.867  | 0.087  | 0.0576  | 0.0016  | 0.68265  | 622    | 45  | 360.8  | 9.8 | 180    | 140 | DISC   | DISC | 41.99357 |
| 11UPR06_57.FIN2 | 20.8  | 2.27  | 1.978  | 0.056  | 0.1873  | 0.0035  | 0.28663  | 1114   | 19  | 1106   | 19  | 1136   | 32  | 1106   | 19   | 0.718133 |
| 11UPR06_58.FIN2 | 111.4 | 1.76  | 1.916  | 0.034  | 0.183   | 0.0019  | 0.54125  | 1085   | 12  | 1083   | 10  | 1086   | 20  | 1083   | 10   | 0.184332 |
| 11UPR06_59.FIN2 | 123.4 | 0.976 | 4.21   | 0.039  | 0.299   | 0.0033  | 0.74941  | 1675.4 | 7.7 | 1688   | 16  | 1659.7 | 8.3 | 1659.7 | 8.3  | 1.705127 |
| 11UPR06_60.FIN2 | 31    | 1.402 | 2.244  | 0.039  | 0.2014  | 0.0031  | 0.46012  | 1193   | 12  | 1182   | 16  | 1213   | 15  | 1182   | 16   | 0.922045 |
| 11UPR06_61.FIN2 | 124.5 | 1.448 | 1.502  | 0.021  | 0.1565  | 0.0016  | 0.59483  | 931.6  | 8.3 | 937    | 8.6 | 937    | 14  | 937    | 8.6  | 0.579648 |
| 11UPR06_62.FIN2 | 103.7 | 0.609 | 4.584  | 0.042  | 0.3061  | 0.003   | 0.52657  | 1745.8 | 7.7 | 1721   | 15  | 1786   | 10  | 1786   | 10   | 3.639418 |
| 11UPR06_63.FIN2 | 221   | 0.581 | 0.775  | 0.012  | 0.09312 | 0.00075 | 0.4217   | 582.4  | 6.7 | 573.9  | 4.4 | 615    | 18  | 573.9  | 4.4  | 1.459478 |
| 11UPR06_64.FIN2 | 133.2 | 0.88  | 5.106  | 0.049  | 0.3356  | 0.0031  | 0.54877  | 1836.6 | 8.1 | 1865   | 15  | 1811   | 11  | 1811   | 11   | 2.981778 |

|                  |       |        |        |        |         |         |          |        |     |        |     |        |     |        |      |          |
|------------------|-------|--------|--------|--------|---------|---------|----------|--------|-----|--------|-----|--------|-----|--------|------|----------|
| 11UPRO6_65.FIN2  | 38.4  | 1.454  | 1.77   | 0.036  | 0.1728  | 0.0027  | 0.30875  | 1033   | 13  | 1027   | 15  | 1030   | 32  | 1027   | 15   | 0.580833 |
| 11UPRO6_66.FIN2  | 131.6 | 0.77   | 4.098  | 0.039  | 0.2925  | 0.0028  | 0.53706  | 1654.5 | 7.9 | 1654   | 14  | 1660.6 | 9.4 | 1660.6 | 9.4  | 0.397447 |
| 11UPRO6_67.FIN2  | 90.8  | 0.656  | 14.05  | 0.17   | 0.5436  | 0.0075  | 0.69353  | 2752   | 12  | 2797   | 31  | 2722   | 11  | 2722   | 11   | 2.755327 |
| 11UPRO6_68.FIN2  | 45.2  | 1.79   | 12.67  | 0.12   | 0.495   | 0.0057  | 0.53482  | 2655.9 | 9.5 | 2595   | 25  | 2697.1 | 9.6 | 2697.1 | 9.6  | 3.785547 |
| 11UPRO6_69.FIN2  | 122   | 1.9    | 14.09  | 0.22   | 0.5405  | 0.0055  | 0.69727  | 2754   | 15  | 2785   | 23  | 2743   | 14  | 2743   | 14   | 1.53117  |
| 11UPRO6_70.FIN2  | 314   | 0.984  | 0.0965 | 0.0027 | 0.01472 | 0.00029 | 0.36609  | 93.5   | 2.5 | 94.2   | 1.8 | 172    | 26  | 94.2   | 1.8  | 0.748663 |
| 11UPRO6_71.FIN2  | 195   | 2.008  | 3.115  | 0.026  | 0.2499  | 0.0018  | 0.62489  | 1436.1 | 6.5 | 1438   | 9.2 | 1436   | 7.4 | 1436   | 7.4  | 0.139276 |
| 11UPRO6_72.FIN2  | 93.7  | 1.696  | 2.071  | 0.057  | 0.1849  | 0.0041  | 0.94735  | 1137   | 18  | 1093   | 22  | 1224   | 19  | 1093   | 22   | 3.869833 |
| 11UPRO6_73.FIN2  | 532   | 1.481  | 12.25  | 0.11   | 0.4936  | 0.0039  | 0.7941   | 2623   | 8.7 | 2586   | 17  | 2651.3 | 6.7 | 2651.3 | 6.7  | 2.462943 |
| 11UPRO6_74.FIN2  | 382   | 1.8    | 0.1087 | 0.0029 | 0.01625 | 0.00029 | 0.29883  | 104.7  | 2.7 | 103.9  | 1.8 | 205    | 41  | 103.9  | 1.8  | 0.764088 |
| 11UPRO6_75.FIN2  | 311   | 0.898  | 0.1281 | 0.005  | 0.01554 | 0.00027 | 0.38809  | 122.2  | 4.5 | 99.4   | 1.7 | 641    | 54  | 99.4   | 1.7  | 18.65794 |
| 11UPRO6_76.FIN2  | 75    | 1.084  | 4.276  | 0.048  | 0.3043  | 0.0043  | 0.48457  | 1689.2 | 9.1 | 1712   | 21  | 1655   | 17  | 1655   | 17   | 3.444109 |
| 11UPRO6_77.FIN2  | 106   | 1.526  | 8.01   | 0.1    | 0.422   | 0.0052  | 0.77696  | 2231   | 12  | 2269   | 24  | 2198   | 10  | 2198   | 10   | 3.230209 |
| 11UPRO6_78.FIN2  | 69    | 1.711  | 7.35   | 0.16   | 0.3942  | 0.0067  | 0.64293  | 2153   | 19  | 2141   | 31  | 2162   | 23  | 2162   | 23   | 0.971323 |
| 11UPRO6_79.FIN2  | 108.6 | 0.709  | 0.5382 | 0.0091 | 0.07016 | 0.00077 | 0.018753 | 436.9  | 6   | 437.1  | 4.7 | 449    | 20  | 437.1  | 4.7  | 0.045777 |
| 11UPRO6_80.FIN2  | 119   | 0.933  | 0.0997 | 0.0043 | 0.01414 | 0.00032 | 0.13023  | 96.4   | 4   | 90.5   | 2   | 320    | 52  | 90.5   | 2    | 6.120332 |
| 11UPRO6_81.FIN2  | 248.3 | 1.09   | 3.501  | 0.07   | 0.2471  | 0.0048  | 0.85613  | 1526   | 16  | 1423   | 25  | 1672   | 16  | 1672   | 16   | 14.89234 |
| 11UPRO6_82.FIN2  | 69.1  | 0.804  | 4.034  | 0.048  | 0.2973  | 0.0031  | 0.44262  | 1641.5 | 9.4 | 1677   | 15  | 1606   | 13  | 1606   | 13   | 4.420922 |
| 11UPRO6_83.FIN2  | 320   | 2.4    | 11.23  | 0.8    | 0.427   | 0.027   | 0.99151  | 2507   | 75  | 2270   | 130 | 2755   | 14  | 2755   | 14   | 17.60436 |
| 11UPRO6_84.FIN2  | 293   | 0.658  | 0.3786 | 0.0064 | 0.05279 | 0.0008  | 0.14065  | 325.8  | 4.7 | 331.6  | 4.9 | 305    | 26  | 331.6  | 4.9  | 1.780233 |
| 11UPRO6_85.FIN2  | 181.5 | 0.593  | 4.038  | 0.05   | 0.2815  | 0.0028  | 0.29833  | 1643   | 10  | 1599   | 14  | 1705   | 18  | 1705   | 18   | 6.217009 |
| 11UPRO6_86.FIN2  | 662   | 3.01   | 4.442  | 0.042  | 0.3023  | 0.0032  | 0.88416  | 1719.5 | 7.8 | 1702   | 16  | 1739.9 | 5.3 | 1739.9 | 5.3  | 2.178286 |
| 11UPRO6_87.FIN2  | 236   | 0.948  | 1.928  | 0.018  | 0.1866  | 0.0017  | 0.49782  | 1090.4 | 6.2 | 1102.6 | 9.4 | 1066   | 11  | 1102.6 | 9.4  | 1.118855 |
| 11UPRO6_88.FIN2  | 308   | 1.465  | 2.457  | 0.02   | 0.2148  | 0.0025  | 0.60569  | 1259.1 | 5.9 | 1254   | 13  | 1268.1 | 9.7 | 1268.1 | 9.7  | 1.1119   |
| 11UPRO6_89.FIN2  | 50.6  | 1.7    | 0.73   | 0.02   | 0.0909  | 0.002   | 0.35459  | 555    | 12  | 561    | 12  | 547    | 30  | 561    | 12   | 1.081081 |
| 11UPRO6_90.FIN2  | 167   | 0.906  | 0.1012 | 0.0037 | 0.01476 | 0.00023 | 0.02919  | 97.8   | 3.4 | 94.5   | 1.4 | 231    | 33  | 94.5   | 1.4  | 3.374233 |
| 11UPRO6_91.FIN2  | 117.6 | 1.313  | 3.116  | 0.039  | 0.2449  | 0.0023  | 0.44079  | 1437   | 9.6 | 1412   | 12  | 1460   | 13  | 1460   | 13   | 3.287671 |
| 11UPRO6_92.FIN2  | 47.8  | 0.745  | 2.729  | 0.036  | 0.2312  | 0.003   | 0.39822  | 1338.2 | 9.7 | 1340   | 16  | 1327   | 17  | 1327   | 17   | 0.979653 |
| 11UPRO6_93.FIN2  | 166   | 3.17   | 0.575  | 0.019  | 0.0744  | 0.0017  | 0.78164  | 460    | 12  | 463    | 10  | 463    | 32  | 463    | 10   | 0.652174 |
| 11UPRO6_94.FIN2  | 207.5 | 1.042  | 3.422  | 0.048  | 0.2645  | 0.0034  | 0.85073  | 1508   | 11  | 1512   | 17  | 1483   | 16  | 1483   | 16   | 1.955496 |
| 11UPRO6_95.FIN2  | 272   | 1.707  | 4.362  | 0.039  | 0.3014  | 0.003   | 0.81895  | 1704.6 | 7.4 | 1698   | 15  | 1711.8 | 6   | 1711.8 | 6    | 0.806169 |
| 11UPRO6_96.FIN2  | 108.3 | 1.297  | 1.32   | 0.06   | 0.0874  | 0.0034  | 0.92435  | 847    | 27  | 539    | 20  | 1769   | 22  | DISC   | DISC | 36.36364 |
| 11UPRO6_97.FIN2  | 79.8  | 2.44   | 0.592  | 0.013  | 0.0741  | 0.0011  | 0.31347  | 471.5  | 8.4 | 460.8  | 6.8 | 478    | 23  | 460.8  | 6.8  | 2.269353 |
| 11UPRO6_98.FIN2  | 99.1  | 0.608  | 2.872  | 0.045  | 0.2348  | 0.0037  | 0.74705  | 1377   | 12  | 1359   | 19  | 1390   | 14  | 1390   | 14   | 2.230216 |
| 11UPRO6_99.FIN2  | 231   | 2.54   | 4.054  | 0.024  | 0.28    | 0.002   | 0.54316  | 1644.9 | 4.8 | 1591   | 10  | 1698.8 | 7.9 | 1698.8 | 7.9  | 6.345656 |
| 11UPRO6_100.FIN2 | 63.5  | 1.01   | 0.867  | 0.019  | 0.1061  | 0.0015  | 0.21786  | 633    | 11  | 650    | 8.5 | 570    | 30  | 650    | 8.5  | 2.685624 |
| 11UPRO6_101.FIN2 | 122.1 | 0.6542 | 1.85   | 0.023  | 0.1781  | 0.0018  | 0.32463  | 1064   | 8.4 | 1056.6 | 9.9 | 1060   | 17  | 1056.6 | 9.9  | 0.695489 |
| 11UPRO6_102.FIN2 | 55    | 0.856  | 0.627  | 0.019  | 0.0795  | 0.0013  | 0.20135  | 493    | 12  | 493.2  | 7.9 | 518    | 35  | 493.2  | 7.9  | 0.040568 |
| 11UPRO6_103.FIN2 | 322   | 1.88   | 1.81   | 0.012  | 0.1792  | 0.0012  | 0.27646  | 1048.7 | 4.5 | 1062.4 | 6.7 | 1022.8 | 9.2 | 1062.4 | 6.7  | 1.306379 |
| 11UPRO6_104.FIN2 | 7.77  | 2.5    | 1.82   | 0.1    | 0.1577  | 0.0064  | 0.18913  | 1048   | 37  | 943    | 36  | 1327   | 72  | 943    | 36   | 10.01908 |
| 11UPRO6_105.FIN2 | 69.4  | 1.299  | 1.819  | 0.034  | 0.1732  | 0.0041  | 0.26563  | 1051   | 12  | 1029   | 23  | 1057   | 22  | 1029   | 23   | 2.093245 |
| 11UPRO6_106.FIN2 | 84.1  | 0.6683 | 1.828  | 0.027  | 0.181   | 0.0018  | 0.2417   | 1054.8 | 9.6 | 1072.4 | 9.8 | 1020   | 17  | 1072.4 | 9.8  | 1.668563 |
| 11UPRO6_107.FIN2 | 141.9 | 1.281  | 0.81   | 0.017  | 0.0987  | 0.0016  | 0.46364  | 601.9  | 9.3 | 606.4  | 9.4 | 581    | 24  | 606.4  | 9.4  | 0.747632 |
| 11UPRO6_108.FIN2 | 291   | 2.286  | 1.779  | 0.019  | 0.1745  | 0.002   | 0.60722  | 1038.2 | 7.1 | 1037   | 11  | 1034   | 12  | 1037   | 11   | 0.115585 |
| 11UPRO6_109.FIN2 | 54.1  | 1.415  | 1.911  | 0.035  | 0.1843  | 0.003   | 0.53566  | 1085   | 13  | 1092   | 17  | 1069   | 22  | 1092   | 17   | 0.645161 |
| 11UPRO6_110.FIN2 | 116   | 1.146  | 0.134  | 0.018  | 0.01542 | 0.00049 | 0.38416  | 125    | 15  | 98.6   | 3.1 | 840    | 230 | 98.6   | 3.1  | 21.12    |
| 11UPRO6_111.FIN2 | 1190  | 1.88   | 0.0934 | 0.0065 | 0.01406 | 0.00073 | 0.93352  | 90.3   | 6.2 | 89.9   | 4.6 | 245    | 29  | 89.9   | 4.6  | 0.442968 |
| 11UPRO6_113.FIN2 | 44.3  | 0.864  | 1.636  | 0.039  | 0.1569  | 0.0029  | 0.4594   | 984    | 15  | 939    | 16  | 1067   | 29  | 939    | 16   | 4.573171 |
| 11UPRO6_114.FIN2 | 173   | 1.141  | 4.475  | 0.044  | 0.3075  | 0.0029  | 0.58215  | 1725.8 | 8   | 1728   | 14  | 1730.1 | 7.8 | 1730.1 | 7.8  | 0.12138  |
| 11UPRO6_115.FIN2 | 248.8 | 0.907  | 0.592  | 0.017  | 0.07044 | 0.00079 | 0.49988  | 471    | 10  | 438.8  | 4.7 | 621    | 44  | 438.8  | 4.7  | 6.836518 |
| 11UPRO6_116.FIN2 | 76.1  | 2.069  | 1.984  | 0.036  | 0.1861  | 0.0035  | 0.60383  | 1112   | 13  | 1100   | 19  | 1129   | 21  | 1100   | 19   | 1.079137 |
| 11UPRO6_117.FIN2 | 137   | 0.931  | 2.708  | 0.031  | 0.2304  | 0.0027  | 0.045823 | 1331.7 | 8.7 | 1336   | 14  | 1328   | 22  | 1328   | 22   | 0.60241  |
| 11UPRO6_118.FIN2 | 103.2 | 0.5427 | 0.855  | 0.016  | 0.1027  | 0.0013  | 0.33597  | 627.6  | 9.1 | 629.8  | 7.8 | 605    | 23  | 629.8  | 7.8  | 0.350542 |
| 11UPRO6_119.FIN2 | 75    | 1.07   | 3.771  | 0.042  | 0.2775  | 0.0031  | 0.40264  | 1585.9 | 9   | 1578   | 16  | 1579   | 12  | 1579   | 12   | 0.063331 |
| 11UPRO6_120.FIN2 | 168.3 | 1.86   | 0.857  | 0.011  | 0.102   | 0.0011  | 0.22789  | 628.9  | 5.8 | 625.8  | 6.7 | 629    | 20  | 625.8  | 6.7  | 0.492924 |
| 11UPRO6_121.FIN2 | 242   | 1.878  | 3.405  | 0.031  | 0.2672  | 0.0021  | 0.50097  | 1505.2 | 7.1 | 1526   | 11  | 1473   | 9.1 | 1473   | 9.1  | 3.598099 |
|                  |       |        |        |        |         |         |          |        |     |        |     |        |     |        |      |          |
| 11UPRO7_1.FIN2   | 190.4 | 1.027  | 0.1033 | 0.0038 | 0.01476 | 0.00026 | 0.047768 | 99.7   | 3.5 | 94.4   | 1.6 | 301    | 44  | 94.4   | 1.6  | 5.315948 |
| 11UPRO7_2.FIN2   | 29.4  | 0.598  | 3.646  | 0.068  | 0.2615  | 0.0056  | 0.45118  | 1560   | 15  | 1497   | 29  | 1643   | 23  | 1643   | 23   | 8.886184 |
| 11UPRO7_3.FIN2   | 53.5  | 0.625  | 1.94   | 0.042  | 0.1813  | 0.0019  | 0.24369  | 1093   | 14  | 1074   | 10  | 1166   | 39  | 1074   | 10   | 1.738335 |
| 11UPRO7_4.FIN2   | 22.9  | 2.009  | 0.754  | 0.025  | 0.0909  | 0.0021  | 0.17133  | 570    | 15  | 561    | 13  | 593    | 38  | 561    | 13   | 1.578947 |
| 11UPRO7_5.FIN2   | 77.3  | 0.973  | 0.588  | 0.014  | 0.074   | 0.0011  | 0.41917  | 470.7  | 8.5 | 460.1  | 6.6 | 505    | 35  | 460.1  | 6.6  | 2.251965 |
| 11UPRO7_6.FIN2   | 30.8  | 1.005  | 1.741  | 0.033  | 0.1707  | 0.0025  | 0.32699  | 1026   | 13  | 1016   | 14  | 1016   | 18  | 1016   | 14   | 0.974659 |
| 11UPRO7_7.FIN2   | 231   | 30.4   | 1.579  | 0.03   | 0.1615  | 0.0025  | 0.97209  | 957    | 14  | 965    | 14  | 950    | 11  | 965    | 14   | 0.835946 |
| 11UPRO7_8.FIN2   | 231   | 1.864  | 1.737  | 0.018  | 0.1698  | 0.0015  | 0.59119  | 1022.1 | 6.6 | 1011.2 | 8   | 1057   | 13  | 1011.2 | 8    | 1.066432 |
| 11UPRO7_9.FIN2   | 448   | 1.521  | 2.33   | 0.025  | 0.2056  | 0.0024  | 0.3346   | 1220.9 | 7.5 | 1208   | 13  | 1242   | 9.4 | 1242   | 9.4  | 2.73752  |
| 11UPRO7_10.FIN2  | 98.8  | 1.553  | 0.1143 | 0.0058 | 0.01622 | 0.00045 | 0.016421 | 109.6  | 5.3 | 103.7  | 2.9 | 337    | 52  | 103.7  | 2.9  | 5.383212 |
| 11UPRO7_11.FIN2  | 68.9  | 2.944  | 4.098  | 0.057  | 0.2985  | 0.0038  | 0.75134  | 1653   | 11  | 1683   | 19  | 1627   | 13  | 1627   | 13   | 3.441918 |
| 11UPRO7_12.FIN2  | 221   | 2.331  | 4.68   | 0.2    | 0.3016  | 0.0045  | 0.77585  | 1765   | 37  | 1699   | 22  | 1846   | 52  | 1846   | 52   | 7.963164 |
| 11UPRO7_13.FIN2  | 174   | 1.328  | 6.873  | 0.063  | 0.3756  | 0.0047  | 0.6212   | 2094.8 | 8.1 | 2055   | 22  | 2147   | 14  | 2147   | 14   | 4.285049 |
| 11UPRO7_14.FIN2  | 857   | 1.195  | 0.523  | 0.013  | 0.0591  | 0.0019  | 0.89518  | 428    | 8.4 | 370    | 11  | 776    | 37  | 370    | 11   | 13.5514  |
| 11UPRO7_15.FIN2  | 78.1  | 1.278  | 6.117  | 0.063  | 0.3501  | 0.003   | 0.55413  | 1991.9 | 8.9 | 1935   |     |        |     |        |      |          |

|                  |       |       |        |        |         |         |          |        |     |        |     |        |     |        |     |          |
|------------------|-------|-------|--------|--------|---------|---------|----------|--------|-----|--------|-----|--------|-----|--------|-----|----------|
| 11UPR07_34.FIN2  | 152   | 1.78  | 0.4296 | 0.0069 | 0.05697 | 0.0007  | 0.24813  | 362.7  | 4.9 | 357.1  | 4.3 | 398    | 27  | 357.1  | 4.3 | 1.543976 |
| 11UPR07_35.FIN2  | 539   | 1.144 | 2.277  | 0.045  | 0.1664  | 0.0045  | 0.61486  | 1204   | 14  | 992    | 25  | 1588   | 31  | 992    | 25  | 17.60797 |
| 11UPR07_36.FIN2  | 85.9  | 1.605 | 3.786  | 0.054  | 0.2751  | 0.0032  | 0.59308  | 1589   | 11  | 1566   | 16  | 1627   | 14  | 1627   | 14  | 3.749232 |
| 11UPR07_37.FIN2  | 990   | 2.25  | 1.251  | 0.065  | 0.11    | 0.0057  | 0.98442  | 816    | 30  | 671    | 33  | 1253   | 13  | 671    | 33  | 17.76961 |
| 11UPR07_38.FIN2  | 125.4 | 1.076 | 4.968  | 0.053  | 0.3208  | 0.0037  | 0.69866  | 1813.1 | 9   | 1793   | 18  | 1838   | 11  | 1838   | 11  | 2.448313 |
| 11UPR07_39.FIN2  | 863   | 6.7   | 3.1    | 0.053  | 0.2297  | 0.0039  | 0.9478   | 1431   | 13  | 1332   | 20  | 1580.1 | 5.2 | 1580.1 | 5.2 | 15.70154 |
| 11UPR07_40.FIN2  | 156.6 | 0.568 | 1.804  | 0.023  | 0.177   | 0.0027  | 0.81577  | 1046.3 | 8.5 | 1050   | 15  | 1040   | 15  | 1050   | 15  | 0.353627 |
| 11UPR07_41.FIN2  | 238.2 | 3.9   | 0.601  | 0.029  | 0.0741  | 0.0027  | 0.87397  | 481    | 18  | 461    | 16  | 590    | 30  | 461    | 16  | 4.158004 |
| 11UPR07_42.FIN2  | 241   | 0.866 | 0.4964 | 0.0095 | 0.0654  | 0.0011  | 0.69628  | 408.8  | 6.5 | 409    | 6.6 | 414    | 17  | 409    | 6.6 | 0.048924 |
| 11UPR07_43.FIN2  | 90.3  | 1.775 | 0.865  | 0.027  | 0.0806  | 0.0021  | 0.83117  | 633    | 14  | 499    | 13  | 1185   | 21  | 499    | 13  | 21.16904 |
| 11UPR07_44.FIN2  | 371   | 2.69  | 4.613  | 0.04   | 0.3128  | 0.0031  | 0.92053  | 1751.2 | 7.4 | 1754   | 15  | 1748.2 | 8.2 | 1748.2 | 8.2 | 0.33177  |
| 11UPR07_45.FIN2  | 179.7 | 0.448 | 3.985  | 0.045  | 0.2867  | 0.0037  | 0.87948  | 1631.7 | 9.5 | 1625   | 19  | 1638.9 | 7.5 | 1638.9 | 7.5 | 0.84813  |
| 11UPR07_46.FIN2  | 78.8  | 0.676 | 0.43   | 0.011  | 0.05572 | 0.0008  | 0.051963 | 362.3  | 7.9 | 349.5  | 4.9 | 465    | 35  | 349.5  | 4.9 | 3.532984 |
| 11UPR07_47.FIN2  | 90.7  | 0.746 | 2.72   | 0.27   | 0.1837  | 0.0036  | 0.83049  | 1290   | 65  | 1087   | 19  | 1590   | 120 | 1087   | 19  | 15.73643 |
| 11UPR07_48.FIN2  | 259   | 1.921 | 3.163  | 0.023  | 0.2529  | 0.002   | 0.58329  | 1448.7 | 5.5 | 1453   | 10  | 1447.5 | 7.9 | 1447.5 | 7.9 | 0.379965 |
| 11UPR07_49.FIN2  | 106.7 | 1.05  | 6.32   | 0.083  | 0.3652  | 0.0046  | 0.68552  | 2020   | 11  | 2006   | 22  | 2032   | 12  | 2032   | 12  | 1.279528 |
| 11UPR07_50.FIN2  | 107.8 | 2.37  | 13.17  | 0.11   | 0.5262  | 0.0037  | 0.61548  | 2693.2 | 8.1 | 2725   | 16  | 2669   | 9   | 2669   | 9   | 2.098164 |
| 11UPR07_51.FIN2  | 181   | 1.375 | 0.1061 | 0.0043 | 0.01396 | 0.00031 | 0.16207  | 102.3  | 3.9 | 89.4   | 2   | 464    | 63  | 89.4   | 2   | 12.60997 |
| 11UPR07_52.FIN2  | 266   | 1.264 | 2.64   | 0.019  | 0.2261  | 0.0016  | 0.402    | 1311.6 | 5.2 | 1313.9 | 8.4 | 1310.5 | 9.4 | 1310.5 | 9.4 | 0.259443 |
| 11UPR07_53.FIN2  | 460   | 2.91  | 3.886  | 0.074  | 0.2815  | 0.0045  | 0.86639  | 1609   | 15  | 1599   | 23  | 1638   | 12  | 1638   | 12  | 2.380952 |
| 11UPR07_54.FIN2  | 167.7 | 1.12  | 8.47   | 0.12   | 0.3567  | 0.005   | 0.82564  | 2281   | 13  | 1970   | 25  | 2582.6 | 8.6 | 2582.6 | 8.6 | 23.72028 |
| 11UPR07_55.FIN2  | 251.4 | 1.687 | 3.89   | 0.23   | 0.2597  | 0.0039  | 0.78394  | 1592   | 43  | 1487   | 20  | 1735   | 77  | 1735   | 77  | 14.29395 |
| 11UPR07_56.FIN2  | 209   | 1.272 | 0.0952 | 0.0032 | 0.01456 | 0.00023 | 0.1174   | 92.3   | 3   | 93.2   | 1.5 | 204    | 35  | 93.2   | 1.5 | 0.975081 |
| 11UPR07_57.FIN2  | 46.8  | 0.418 | 14.47  | 0.17   | 0.561   | 0.0083  | 0.7496   | 2780   | 11  | 2869   | 34  | 2723.7 | 9.8 | 2723.7 | 9.8 | 5.334655 |
| 11UPR07_58.FIN2  | 67.5  | 1.141 | 4.433  | 0.075  | 0.3074  | 0.0039  | 0.49248  | 1717   | 14  | 1730   | 20  | 1721   | 14  | 1721   | 14  | 0.522952 |
| 11UPR07_59.FIN2  | 116.5 | 0.972 | 2.104  | 0.023  | 0.1957  | 0.0024  | 0.56466  | 1149.6 | 7.4 | 1152   | 13  | 1149   | 11  | 1152   | 13  | 0.208768 |
| 11UPR07_60.FIN2  | 186   | 4.57  | 1.09   | 0.04   | 0.1108  | 0.0036  | 0.91318  | 745    | 19  | 677    | 21  | 976    | 18  | 677    | 21  | 9.127517 |
| 11UPR07_61.FIN2  | 40.6  | 1.178 | 2.702  | 0.07   | 0.2255  | 0.0054  | 0.46506  | 1331   | 20  | 1310   | 29  | 1385   | 27  | 1385   | 27  | 5.415162 |
| 11UPR07_62.FIN2  | 172.2 | 1.419 | 3.488  | 0.065  | 0.2494  | 0.0052  | 0.86866  | 1523   | 15  | 1435   | 27  | 1646   | 11  | 1646   | 11  | 12.81896 |
| 11UPR07_63.FIN2  | 669   | 1.4   | 0.5043 | 0.0054 | 0.06262 | 0.00075 | 0.41856  | 414.5  | 3.7 | 391.5  | 4.6 | 547    | 24  | 391.5  | 4.6 | 5.548854 |
| 11UPR07_64.FIN2  | 758   | 2.25  | 0.664  | 0.08   | 0.0593  | 0.0014  | 0.8818   | 510    | 46  | 371.2  | 8.4 | 1120   | 170 | 371.2  | 8.4 | 27.21569 |
| 11UPR07_65.FIN2  | 51.4  | 1.168 | 3.465  | 0.053  | 0.2719  | 0.0033  | 0.66553  | 1520   | 12  | 1550   | 17  | 1491   | 13  | 1491   | 13  | 3.957076 |
| 11UPR07_66.FIN2  | 312   | 0.988 | 2.66   | 0.11   | 0.1897  | 0.0081  | 0.96418  | 1313   | 35  | 1117   | 44  | 1671   | 12  | 1117   | 44  | 14.92765 |
| 11UPR07_67.FIN2  | 482   | 1.014 | 2.094  | 0.018  | 0.1955  | 0.0016  | 0.71298  | 1147.4 | 5.7 | 1150.8 | 8.6 | 1138.8 | 7.1 | 1150.8 | 8.6 | 0.296322 |
| 11UPR07_68.FIN2  | 196   | 1.96  | 0.5431 | 0.0098 | 0.07037 | 0.00089 | 0.098291 | 440.1  | 6.4 | 438.3  | 5.4 | 446    | 29  | 438.3  | 5.4 | 0.408998 |
| 11UPR07_69.FIN2  | 49.7  | 0.969 | 3.431  | 0.053  | 0.271   | 0.003   | 0.52613  | 1511   | 12  | 1545   | 15  | 1475   | 17  | 1475   | 17  | 4.745763 |
| 11UPR07_70.FIN2  | 560   | 1.19  | 0.109  | 0.0032 | 0.01524 | 0.00032 | 0.92852  | 104.9  | 3   | 97.5   | 2   | 283    | 32  | 97.5   | 2   | 7.054337 |
| 11UPR07_71.FIN2  | 109.4 | 1.202 | 12.72  | 0.14   | 0.5056  | 0.0066  | 0.5721   | 2658   | 10  | 2637   | 28  | 2686.4 | 9.7 | 2686.4 | 9.7 | 1.838892 |
| 11UPR07_72.FIN2  | 409.4 | 2.74  | 2.422  | 0.066  | 0.1716  | 0.0058  | 0.83197  | 1247   | 20  | 1020   | 32  | 1684   | 22  | 1020   | 32  | 18.20369 |
| 11UPR07_73.FIN2  | 36.4  | 1.549 | 2.085  | 0.047  | 0.182   | 0.0025  | 0.19353  | 1143   | 15  | 1078   | 14  | 1281   | 30  | 1078   | 14  | 5.686789 |
| 11UPR07_74.FIN2  | 161   | 0.792 | 1.722  | 0.031  | 0.163   | 0.0025  | 0.93711  | 1016   | 12  | 973    | 14  | 1114   | 14  | 973    | 14  | 4.232283 |
| 11UPR07_75.FIN2  | 282   | 1.583 | 0.7444 | 0.0085 | 0.09074 | 0.00088 | 0.33857  | 564.7  | 4.9 | 559.8  | 5.2 | 587    | 15  | 559.8  | 5.2 | 0.867717 |
| 11UPR07_76.FIN2  | 181.5 | 1.611 | 3.969  | 0.042  | 0.2882  | 0.0032  | 0.79187  | 1629.6 | 8.5 | 1632   | 16  | 1625.5 | 8   | 1625.5 | 8   | 0.399877 |
| 11UPR07_77.FIN2  | 44.1  | 0.655 | 3.945  | 0.061  | 0.2908  | 0.004   | 0.35628  | 1622   | 12  | 1645   | 20  | 1626   | 18  | 1626   | 18  | 1.168512 |
| 11UPR07_78.FIN2  | 309   | 9.3   | 2.15   | 0.1    | 0.1785  | 0.0034  | 0.228    | 1155   | 31  | 1058   | 18  | 1305   | 67  | 1058   | 18  | 8.398268 |
| 11UPR07_79.FIN2  | 686   | 3     | 2.841  | 0.076  | 0.1971  | 0.0053  | 0.89731  | 1369   | 21  | 1163   | 29  | 1696   | 14  | 1163   | 29  | 15.04748 |
| 11UPR07_80.FIN2  | 249   | 0.983 | 2.522  | 0.029  | 0.2145  | 0.0026  | 0.74232  | 1278.8 | 8.3 | 1252   | 14  | 1314.3 | 9   | 1314.3 | 9   | 4.740166 |
| 11UPR07_81.FIN2  | 161   | 1.396 | 4.473  | 0.064  | 0.308   | 0.0046  | 0.83733  | 1725   | 12  | 1730   | 23  | 1716.6 | 9.5 | 1716.6 | 9.5 | 0.780613 |
| 11UPR07_82.FIN2  | 164   | 2.2   | 3.725  | 0.054  | 0.2756  | 0.0043  | 0.69239  | 1575   | 12  | 1568   | 22  | 1597   | 13  | 1597   | 13  | 1.815905 |
| 11UPR07_83.FIN2  | 410   | 4.38  | 1.066  | 0.09   | 0.1018  | 0.0031  | 0.91122  | 728    | 43  | 624    | 18  | 1000   | 110 | 624    | 18  | 14.28571 |
| 11UPR07_84.FIN2  | 311.4 | 2.1   | 5.451  | 0.067  | 0.3294  | 0.0051  | 0.74316  | 1892   | 11  | 1835   | 25  | 1975   | 12  | 1975   | 12  | 7.088608 |
| 11UPR07_85.FIN2  | 330   | 0.252 | 0.3008 | 0.0057 | 0.04214 | 0.00045 | 0.1049   | 267.4  | 4.4 | 266.1  | 2.8 | 289    | 22  | 266.1  | 2.8 | 0.486163 |
| 11UPR07_86.FIN2  | 511   | 1.66  | 4.019  | 0.088  | 0.2433  | 0.0054  | 0.94648  | 1639   | 19  | 1412   | 26  | 1945   | 11  | 1945   | 11  | 27.4036  |
| 11UPR07_87.FIN2  | 129.4 | 1.143 | 2.218  | 0.032  | 0.1959  | 0.0025  | 0.80513  | 1186   | 10  | 1153   | 14  | 1259   | 14  | 1153   | 14  | 2.782462 |
| 11UPR07_88.FIN2  | 54.9  | 0.829 | 2.479  | 0.052  | 0.2124  | 0.0037  | 0.32306  | 1264   | 15  | 1241   | 20  | 1328   | 31  | 1328   | 31  | 6.551205 |
| 11UPR07_89.FIN2  | 183   | 2.182 | 0.692  | 0.011  | 0.08554 | 0.00073 | 0.29325  | 533.8  | 6.5 | 529.1  | 4.3 | 556    | 21  | 529.1  | 4.3 | 0.88048  |
| 11UPR07_90.FIN2  | 238   | 2.001 | 3.364  | 0.043  | 0.2628  | 0.0039  | 0.73148  | 1495.3 | 9.8 | 1504   | 20  | 1490.8 | 9.7 | 1490.8 | 9.7 | 0.885431 |
| 11UPR07_91.FIN2  | 434   | 5.31  | 4.066  | 0.052  | 0.2921  | 0.0038  | 0.92781  | 1647   | 11  | 1651   | 19  | 1652.4 | 7.3 | 1652.4 | 7.3 | 0.084725 |
| 11UPR07_92.FIN2  | 114.8 | 1.879 | 3.258  | 0.046  | 0.2618  | 0.0034  | 0.65453  | 1470   | 11  | 1501   | 17  | 1437   | 12  | 1437   | 12  | 4.453723 |
| 11UPR07_93.FIN2  | 522   | 3.611 | 1.586  | 0.044  | 0.1503  | 0.0034  | 0.90261  | 962    | 17  | 902    | 19  | 1107   | 17  | 902    | 19  | 6.237006 |
| 11UPR07_94.FIN2  | 623   | 1.513 | 0.4162 | 0.0069 | 0.05208 | 0.00093 | 0.80667  | 353.8  | 5   | 327.3  | 5.7 | 531    | 17  | 327.3  | 5.7 | 7.490107 |
| 11UPR07_95.FIN2  | 285   | 3.065 | 4.591  | 0.051  | 0.3171  | 0.0033  | 0.74824  | 1747   | 9.4 | 1775   | 16  | 1710.1 | 9.5 | 1710.1 | 9.5 | 3.7951   |
| 11UPR07_96.FIN2  | 142   | 0.483 | 0.826  | 0.024  | 0.1     | 0.0023  | 0.69029  | 610    | 13  | 614    | 13  | 654    | 31  | 614    | 13  | 0.655738 |
| 11UPR07_97.FIN2  | 31.5  | 0.621 | 3.8    | 0.11   | 0.2636  | 0.0049  | 0.38235  | 1595   | 23  | 1508   | 25  | 1740   | 36  | 1740   | 36  | 13.33333 |
| 11UPR07_98.FIN2  | 93.1  | 0.76  | 3.768  | 0.067  | 0.2715  | 0.0047  | 0.79427  | 1586   | 14  | 1547   | 24  | 1631   | 13  | 1631   | 13  | 5.150215 |
| 11UPR07_99.FIN2  | 414   | 1.647 | 4.555  | 0.036  | 0.316   | 0.0025  | 0.92591  | 1740.7 | 6.6 | 1770   | 12  | 1708.8 | 7   | 1708.8 | 7   | 3.581461 |
| 11UPR07_100.FIN2 | 74.6  | 2.11  | 2.332  | 0.041  | 0.2041  | 0.0031  | 0.60426  | 1221   | 13  | 1197   | 16  | 1264   | 17  | 1197   | 16  | 1.965602 |
| 11UPR07_101.FIN2 | 242   | 3.68  | 15.52  | 0.18   | 0.5563  | 0.0046  | 0.73556  | 2849   | 11  | 2854   | 20  | 2858   | 8.5 | 2858   | 8.5 | 0.139958 |
| 11UPR07_102.FIN2 | 173   | 1.418 | 3.366  | 0.036  | 0.2626  | 0.0026  | 0.78066  | 1496.1 | 8.3 | 1503   | 13  | 1496   | 10  | 1496   | 10  | 0.467914 |
| 11UPR07_103.FIN2 | 136   | 0.912 | 9.5    | 0.36   | 0.374   | 0.015   | 0.98096  | 2379   | 34  | 2039   | 68  | 2699.6 | 6.9 | 2699.6 | 6.9 | 24.47029 |
| 11UPR07_104.FIN2 | 109   | 0.99  | 5.125  | 0.073  | 0.3344  | 0.0036  | 0.63321  | 1842   | 11  | 1859   | 18  | 1843   | 14  | 1843   | 14  | 0.86815  |
| 11UPR07_105.FIN2 | 184   | 1.177 | 2.078  | 0.047  | 0.1977  | 0.0     |          |        |     |        |     |        |     |        |     |          |

|                   |       |        |        |        |         |         |          |        |     |        |     |        |     |        |      |          |
|-------------------|-------|--------|--------|--------|---------|---------|----------|--------|-----|--------|-----|--------|-----|--------|------|----------|
| Pantherth_2.FIN2  | 176   | 0.825  | 0.6404 | 0.0094 | 0.08118 | 0.00094 | 0.18785  | 502.3  | 5.8 | 503.1  | 5.6 | 496    | 30  | 503.1  | 5.6  | 0.159267 |
| Pantherth_3.FIN2  | 276   | 1.372  | 0.3249 | 0.0056 | 0.04551 | 0.0005  | 0.43718  | 285.5  | 4.3 | 286.9  | 3.1 | 269    | 34  | 286.9  | 3.1  | 0.490368 |
| Pantherth_4.FIN2  | 149.6 | 2.013  | 0.77   | 0.014  | 0.0903  | 0.0011  | 0.61204  | 579.2  | 7.8 | 557.4  | 6.7 | 653    | 31  | 557.4  | 6.7  | 3.763812 |
| Pantherth_5.FIN2  | 127.9 | 1.083  | 4.359  | 0.042  | 0.2981  | 0.0029  | 0.64968  | 1704.1 | 7.9 | 1682   | 14  | 1724   | 15  | 1724   | 15   | 2.436195 |
| Pantherth_6.FIN2  | 82.5  | 6.71   | 1.153  | 0.028  | 0.1103  | 0.0018  | 0.60605  | 784    | 13  | 674    | 11  | 1105   | 40  | 674    | 11   | 14.03061 |
| Pantherth_7.FIN2  | 88.3  | 2.29   | 14.78  | 0.15   | 0.5242  | 0.0057  | 0.65616  | 2800.3 | 9.9 | 2716   | 24  | 2867   | 13  | 2867   | 13   | 5.266829 |
| Pantherth_8.FIN2  | 308   | 0.696  | 0.7703 | 0.0087 | 0.09352 | 0.00084 | 0.41876  | 579.7  | 5   | 576.3  | 5   | 591    | 22  | 576.3  | 5    | 0.58651  |
| Pantherth_8.FIN2  | 150.8 | 0.6234 | 3.175  | 0.047  | 0.2445  | 0.0033  | 0.64228  | 1451   | 11  | 1410   | 17  | 1498   | 26  | 1498   | 26   | 5.874499 |
| Pantherth_9.FIN2  | 74.9  | 0.6358 | 3.37   | 0.048  | 0.2601  | 0.004   | 0.48996  | 1497   | 11  | 1490   | 20  | 1508   | 29  | 1508   | 29   | 1.193634 |
| Pantherth_10.FIN2 | 108   | 1.805  | 2.04   | 0.031  | 0.1913  | 0.0024  | 0.5905   | 1128   | 10  | 1128   | 13  | 1135   | 28  | 1128   | 13   | 0        |
| Pantherth_11.FIN2 | 172.5 | 0.83   | 0.4706 | 0.0079 | 0.06146 | 0.00065 | 0.18496  | 391.4  | 5.4 | 384.5  | 4   | 407    | 45  | 384.5  | 4    | 1.762902 |
| Pantherth_12.FIN2 | 357   | 0.95   | 2.631  | 0.05   | 0.21    | 0.0032  | 0.80083  | 1308   | 14  | 1229   | 17  | 1435   | 18  | 1435   | 18   | 14.3554  |
| Pantherth_13.FIN2 | 66.9  | 1.547  | 1.593  | 0.03   | 0.154   | 0.0021  | 0.46338  | 968    | 12  | 923    | 12  | 1063   | 32  | 923    | 12   | 4.64876  |
| Pantherth_13.FIN2 | 267   | 2.864  | 1.629  | 0.069  | 0.1287  | 0.0057  | 0.74638  | 980    | 27  | 780    | 33  | 1459   | 64  | 780    | 33   | 20.40816 |
| Pantherth_14.FIN2 | 98.2  | 1.774  | 3.161  | 0.051  | 0.2416  | 0.0034  | 0.51307  | 1447   | 12  | 1395   | 18  | 1529   | 26  | 1529   | 26   | 8.763898 |
| Pantherth_15.FIN2 | 100.6 | 0.5948 | 3.537  | 0.04   | 0.2582  | 0.0024  | 0.33027  | 1535   | 9   | 1480   | 12  | 1615   | 22  | 1615   | 22   | 8.359133 |
| Pantherth_16.FIN2 | 22.4  | 1.6    | 10.1   | 0.16   | 0.4485  | 0.007   | 0.57485  | 2442   | 15  | 2387   | 31  | 2478   | 21  | 2478   | 21   | 3.672316 |
| Pantherth_17.FIN2 | 38.6  | 0.602  | 1.571  | 0.033  | 0.1488  | 0.0023  | 0.26462  | 959    | 13  | 896    | 13  | 1097   | 49  | 896    | 13   | 6.569343 |
| Pantherth_18.FIN2 | 147   | 1.307  | 0.436  | 0.011  | 0.0562  | 0.0012  | 0.24858  | 368    | 7.5 | 352.4  | 7.4 | 459    | 66  | 352.4  | 7.4  | 4.23913  |
| Pantherth_19.FIN2 | 117.5 | 2.898  | 11.118 | 0.088  | 0.4209  | 0.0042  | 0.48811  | 2532.6 | 7.4 | 2264   | 19  | 2754   | 14  | 2754   | 14   | 17.7923  |
| Pantherth_20.FIN2 | 100.8 | 2.082  | 2.205  | 0.03   | 0.1944  | 0.0024  | 0.4087   | 1182   | 9.5 | 1145   | 13  | 1253   | 29  | 1145   | 13   | 3.130288 |
| Pantherth_21.FIN2 | 239   | 2.38   | 3.855  | 0.036  | 0.2573  | 0.0029  | 0.67092  | 1605   | 7.8 | 1476   | 15  | 1771   | 13  | 1771   | 13   | 16.65726 |
| Pantherth_22.FIN2 | 208.7 | 1.254  | 3.886  | 0.045  | 0.2709  | 0.0028  | 0.47678  | 1611.7 | 9.2 | 1545   | 14  | 1670   | 16  | 1670   | 16   | 7.48503  |
| Pantherth_23.FIN2 | 248   | 1.64   | 0.0984 | 0.0029 | 0.01445 | 0.00034 | 0.051183 | 95.2   | 2.7 | 92.5   | 2.2 | 138    | 67  | 92.5   | 2.2  | 2.836134 |
| Pantherth_24.FIN2 | 158.8 | 0.6081 | 0.4776 | 0.0096 | 0.06136 | 0.00076 | 0.26358  | 396    | 6.6 | 383.8  | 4.6 | 477    | 40  | 383.8  | 4.6  | 3.080808 |
| Pantherth_25.FIN2 | 92.6  | 0.82   | 11.99  | 0.1    | 0.4373  | 0.0045  | 0.66893  | 2603.4 | 8.1 | 2338   | 20  | 2815   | 15  | 2815   | 15   | 16.94494 |
| Pantherth_26.FIN2 | 58.9  | 1.346  | 2.994  | 0.065  | 0.2005  | 0.0052  | 0.65455  | 1405   | 16  | 1177   | 28  | 1773   | 34  | 1177   | 28   | 16.22776 |
| Pantherth_27.FIN2 | 28.3  | 1.346  | 1.919  | 0.087  | 0.1561  | 0.0037  | 0.50412  | 1082   | 29  | 935    | 20  | 1412   | 70  | 935    | 20   | 13.58595 |
| Pantherth_29.FIN2 | 105.7 | 1.672  | 3.41   | 0.038  | 0.2581  | 0.0024  | 0.45466  | 1507.1 | 8.5 | 1481   | 12  | 1532   | 19  | 1532   | 19   | 3.328982 |
| Pantherth_30.FIN2 | 81    | 0.93   | 2.512  | 0.028  | 0.209   | 0.0026  | 0.3489   | 1274.9 | 8   | 1223   | 14  | 1367   | 27  | 1367   | 27   | 10.53402 |
| Pantherth_31.FIN2 | 184.3 | 1.548  | 0.5156 | 0.0074 | 0.06709 | 0.00074 | 0.24774  | 422    | 5   | 418.6  | 4.5 | 453    | 37  | 418.6  | 4.5  | 0.805687 |
| Pantherth_32.FIN2 | 42.6  | 0.707  | 11.91  | 0.12   | 0.4654  | 0.0043  | 0.29575  | 2596.9 | 9.1 | 2463   | 19  | 2699   | 20  | 2699   | 20   | 8.743979 |
| Pantherth_33.FIN2 | 217   | 2.45   | 0.4977 | 0.0095 | 0.06424 | 0.00075 | 0.5221   | 409.8  | 6.5 | 401.3  | 4.6 | 452    | 35  | 401.3  | 4.6  | 2.074183 |
| Pantherth_34.FIN2 | 358   | 1.384  | 0.532  | 0.0083 | 0.06786 | 0.0007  | 0.10424  | 432.8  | 5.4 | 423.2  | 4.2 | 476    | 35  | 423.2  | 4.2  | 2.218115 |
| Pantherth_36.FIN2 | 73.9  | 1.192  | 3.224  | 0.048  | 0.2496  | 0.003   | 0.51357  | 1462   | 12  | 1436   | 15  | 1505   | 25  | 1505   | 25   | 4.584718 |
| Pantherth_37.FIN2 | 236   | 5.26   | 0.4812 | 0.0096 | 0.06253 | 0.00092 | 0.52422  | 398.6  | 6.6 | 391    | 5.6 | 452    | 43  | 391    | 5.6  | 1.906673 |
| Pantherth_38.FIN2 | 287   | 8.35   | 0.4669 | 0.0065 | 0.06154 | 0.00062 | 0.16122  | 388.9  | 4.5 | 384.9  | 3.8 | 420    | 34  | 384.9  | 3.8  | 1.028542 |
| Pantherth_39.FIN2 | 25.49 | 0.503  | 12.04  | 0.16   | 0.4868  | 0.0061  | 0.46483  | 2606   | 13  | 2556   | 26  | 2665   | 20  | 2665   | 20   | 4.090056 |
| Pantherth_40.FIN2 | 307   | 1.624  | 3.614  | 0.049  | 0.2525  | 0.0033  | 0.77567  | 1552   | 11  | 1451   | 17  | 1693   | 19  | 1693   | 19   | 14.29415 |
| Pantherth_42.FIN2 | 63.9  | 1.687  | 3.26   | 0.23   | 0.1689  | 0.002   | 0.001278 | 1440   | 57  | 1006   | 11  | 2140   | 140 | DISC   | DISC | 30.13889 |
| Pantherth_43.FIN2 | 94.5  | 1.824  | 1.141  | 0.099  | 0.0922  | 0.0019  | 0.17682  | 764    | 46  | 568    | 11  | 1400   | 180 | 568    | 11   | 25.65445 |
| Pantherth_44.FIN2 | 37.5  | 0.953  | 1.693  | 0.034  | 0.1617  | 0.0024  | 0.10694  | 1005   | 13  | 966    | 13  | 1087   | 43  | 966    | 13   | 3.880597 |
| Pantherth_45.FIN2 | 146   | 1.162  | 0.477  | 0.012  | 0.0643  | 0.0011  | 0.51561  | 395.6  | 8.4 | 401.6  | 6.6 | 378    | 53  | 401.6  | 6.6  | 1.516684 |
| Pantherth_46.FIN2 | 39.1  | 0.4426 | 5.18   | 0.066  | 0.3221  | 0.0041  | 0.302    | 1850   | 11  | 1799   | 20  | 1895   | 28  | 1895   | 28   | 5.065963 |
| Pantherth_47.FIN2 | 40.9  | 0.6889 | 3.564  | 0.041  | 0.2564  | 0.0035  | 0.38846  | 1541.1 | 9   | 1471   | 18  | 1635   | 28  | 1635   | 28   | 10.03058 |
| Pantherth_48.FIN2 | 332   | 18.2   | 1.797  | 0.022  | 0.1755  | 0.002   | 0.67359  | 1044.7 | 8.1 | 1042   | 11  | 1051   | 19  | 1042   | 11   | 0.258447 |
| Pantherth_49.FIN2 | 81.3  | 0.843  | 2.758  | 0.054  | 0.2214  | 0.0042  | 0.59287  | 1346   | 14  | 1289   | 22  | 1429   | 33  | 1429   | 33   | 9.797061 |
| Pantherth_50.FIN2 | 100.7 | 1.885  | 1.52   | 0.035  | 0.1467  | 0.0031  | 0.65975  | 937    | 14  | 882    | 18  | 1078   | 37  | 882    | 18   | 5.869797 |
| Pantherth_51.FIN2 | 345   | 1.247  | 0.0929 | 0.0034 | 0.0137  | 0.00029 | 0.13768  | 90.2   | 3.2 | 87.7   | 1.8 | 124    | 72  | 87.7   | 1.8  | 2.771619 |
| Pantherth_52.FIN2 | 58.7  | 0.615  | 1.66   | 0.027  | 0.1633  | 0.0019  | 0.12263  | 992    | 10  | 975    | 11  | 1014   | 39  | 975    | 11   | 1.71371  |
| Pantherth_53.FIN2 | 144.1 | 1.506  | 14.21  | 0.16   | 0.512   | 0.005   | 0.80208  | 2764   | 10  | 2665   | 21  | 2834   | 11  | 2834   | 11   | 5.963303 |
| Pantherth_54.FIN2 | 423   | 2.74   | 0.207  | 0.033  | 0.01264 | 0.00042 | 0.84958  | 189    | 27  | 81     | 2.7 | 1790   | 350 | DISC   | DISC | 57.14286 |
| Pantherth_55.FIN2 | 98.3  | 1.463  | 0.452  | 0.011  | 0.05963 | 0.00078 | 0.042708 | 378.2  | 7.9 | 373.3  | 4.8 | 376    | 61  | 373.3  | 4.8  | 1.295611 |
| Pantherth_56.FIN2 | 132   | 1.127  | 5.666  | 0.067  | 0.353   | 0.0038  | 0.64771  | 1927.3 | 9.9 | 1949   | 18  | 1892   | 16  | 1892   | 16   | 3.012685 |
| Pantherth_57.FIN2 | 47.4  | 1.339  | 1.263  | 0.022  | 0.1355  | 0.0016  | 0.19402  | 828.3  | 9.7 | 819.1  | 9.1 | 844    | 41  | 819.1  | 9.1  | 1.110709 |
| Pantherth_58.FIN2 | 94.9  | 1.698  | 1.538  | 0.025  | 0.147   | 0.0022  | 0.44025  | 944.7  | 9.8 | 884    | 12  | 1084   | 30  | 884    | 12   | 6.42532  |
| Pantherth_59.FIN2 | 51.9  | 1.478  | 3.56   | 0.053  | 0.2656  | 0.0038  | 0.57766  | 1539   | 12  | 1521   | 19  | 1573   | 24  | 1573   | 24   | 3.305785 |
| Pantherth_60.FIN2 | 113.2 | 3.59   | 1.521  | 0.019  | 0.154   | 0.0013  | 0.58078  | 938.4  | 7.6 | 923    | 7.2 | 973    | 21  | 923    | 7.2  | 1.641091 |
| Pantherth_61.FIN2 | 83.3  | 0.943  | 2.852  | 0.03   | 0.2321  | 0.0022  | 0.29926  | 1368.7 | 7.9 | 1347   | 12  | 1406   | 24  | 1406   | 24   | 4.196302 |
| Pantherth_62.FIN2 | 251   | 0.93   | 0.256  | 0.0037 | 0.03583 | 0.00043 | 0.25344  | 231.3  | 3   | 226.9  | 2.7 | 270    | 38  | 226.9  | 2.7  | 1.902291 |
| Pantherth_63.FIN2 | 104.7 | 1.046  | 2.821  | 0.032  | 0.2324  | 0.0023  | 0.47728  | 1360.4 | 8.4 | 1347   | 12  | 1384   | 20  | 1384   | 20   | 2.67341  |
| Pantherth_64.FIN2 | 465   | 0.997  | 4.437  | 0.028  | 0.3     | 0.0024  | 0.73791  | 1719.6 | 5.4 | 1691   | 12  | 1751.3 | 9.8 | 1751.3 | 9.8  | 3.443157 |
| Pantherth_65.FIN2 | 95    | 1.627  | 1.603  | 0.025  | 0.1625  | 0.0022  | 0.48358  | 971.9  | 9.6 | 970    | 12  | 972    | 28  | 970    | 12   | 0.195493 |
| Pantherth_66.FIN2 | 53.8  | 1.286  | 6.607  | 0.062  | 0.3753  | 0.0028  | 0.41842  | 2059.6 | 8.3 | 2056   | 14  | 2073   | 17  | 2073   | 17   | 0.820068 |
| Pantherth_67.FIN2 | 101.5 | 1.227  | 0.643  | 0.012  | 0.0807  | 0.00098 | 0.26158  | 504.3  | 7.4 | 500.2  | 5.8 | 510    | 43  | 500.2  | 5.8  | 0.813008 |
| Pantherth_68.FIN2 | 263   | 1.37   | 0.4432 | 0.0087 | 0.05827 | 0.00054 | 0.15384  | 372.1  | 6.1 | 365.1  | 3.3 | 427    | 43  | 365.1  | 3.3  | 1.881215 |
| Pantherth_69.FIN2 | 12.51 | 2.105  | 2.062  | 0.079  | 0.1847  | 0.0053  | 0.48819  | 1137   | 26  | 1092   | 29  | 1195   | 69  | 1092   | 29   | 3.957784 |
| Pantherth_70.FIN2 | 47.1  | 1.105  | 1.654  | 0.035  | 0.1667  | 0.0023  | 0.022199 | 990    | 14  | 994    | 12  | 982    | 51  | 994    | 12   | 0.40404  |
| Pantherth_72.FIN2 | 102.9 | 1.91   | 2.051  | 0.021  | 0.1877  | 0.0017  | 0.27623  | 1132.3 | 6.9 | 1108.8 | 9.3 | 1175   | 24  | 1108.8 | 9.3  | 2.075422 |
| Pantherth_73.FIN2 | 55.1  | 0.78   | 0.79   | 0.018  | 0.0948  | 0.0015  | 0.013058 | 591.6  | 9.9 | 583.6  | 9   | 582    | 59  | 583.6  | 9    | 1.352265 |
| Pantherth_74.FIN2 | 246   | 1.103  | 0.0881 | 0.0033 | 0.01308 | 0.00021 | 0.022227 | 85.7   | 3   | 83.8   | 1.3 | 139    | 86  | 83.8   | 1.3  | 2.217036 |
| Pantherth_75.FIN2 | 112   | 1.06   | 3.012  | 0.069  | 0.2352  | 0.0045  | 0.82485  | 1414   | 17  | 1361   | 23  | 1483   | 23  | 1483   | 23   | 8.226568 |
| Pantherth_76.FIN2 | 110.9 | 1.129  | 0.496  | 0.01   | 0.0647  | 0.00076 | 0.085243 | 408.3  | 6.9 | 404.1  | 4   |        |     |        |      |          |

|                   |       |       |        |        |         |         |         |        |     |       |     |      |    |       |     |          |
|-------------------|-------|-------|--------|--------|---------|---------|---------|--------|-----|-------|-----|------|----|-------|-----|----------|
| Panthert_95.FIN2  | 63.3  | 1.007 | 0.805  | 0.018  | 0.0924  | 0.0015  | 0.35448 | 599.1  | 9.9 | 569.8 | 8.6 | 674  | 48 | 569.8 | 8.6 | 4.890669 |
| Panthert_96.FIN2  | 175   | 1.384 | 4.256  | 0.038  | 0.292   | 0.0021  | 0.4671  | 1684.5 | 7.4 | 1651  | 11  | 1730 | 16 | 1730  | 16  | 4.566474 |
| Panthert_97.FIN2  | 302   | 1.207 | 0.2535 | 0.0047 | 0.03609 | 0.00055 | 0.38106 | 229.3  | 3.8 | 228.5 | 3.4 | 211  | 42 | 228.5 | 3.4 | 0.348888 |
| Panthert_98.FIN2  | 64.3  | 1.225 | 3.745  | 0.049  | 0.2659  | 0.0031  | 0.26165 | 1580   | 10  | 1520  | 16  | 1637 | 31 | 1637  | 31  | 7.147221 |
| Panthert_99.FIN2  | 276   | 4.11  | 3.736  | 0.048  | 0.2666  | 0.0035  | 0.84387 | 1579   | 10  | 1523  | 18  | 1638 | 17 | 1638  | 17  | 7.020757 |
| Panthert_100.FIN2 | 102.6 | 1.827 | 2.972  | 0.035  | 0.2295  | 0.0026  | 0.65283 | 1399.6 | 8.9 | 1331  | 13  | 1484 | 18 | 1484  | 18  | 10.30997 |
| Panthert_101.FIN2 | 41    | 0.794 | 4.866  | 0.051  | 0.3057  | 0.0037  | 0.37413 | 1796.9 | 9.1 | 1719  | 18  | 1887 | 22 | 1887  | 22  | 8.903021 |
| Panthert_102.FIN2 | 262   | 1.186 | 0.797  | 0.011  | 0.09497 | 0.00084 | 0.16272 | 594.9  | 6.1 | 584.8 | 5   | 610  | 31 | 584.8 | 5   | 1.697764 |
| Panthert_103.FIN2 | 353   | 1.35  | 4.644  | 0.036  | 0.3063  | 0.0027  | 0.67826 | 1756.8 | 6.6 | 1722  | 13  | 1786 | 12 | 1786  | 12  | 3.583427 |
| Panthert_104.FIN2 | 74.7  | 1.823 | 3.448  | 0.039  | 0.2451  | 0.0023  | 0.51425 | 1516.9 | 9.1 | 1413  | 12  | 1645 | 21 | 1645  | 21  | 14.10334 |
| Panthert_105.FIN2 | 326   | 1.48  | 0.515  | 0.01   | 0.06538 | 0.00095 | 0.619   | 421.8  | 6.7 | 408.3 | 5.7 | 476  | 33 | 408.3 | 5.7 | 3.200569 |
| Panthert_107.FIN2 | 133.2 | 1.878 | 11.8   | 0.11   | 0.4688  | 0.0049  | 0.70652 | 2587.7 | 8.6 | 2480  | 21  | 2665 | 11 | 2665  | 11  | 6.941839 |
| Panthert_109.FIN2 | 124.5 | 1.446 | 4.621  | 0.043  | 0.3051  | 0.0027  | 0.4321  | 1754.4 | 7.6 | 1716  | 14  | 1786 | 18 | 1786  | 18  | 3.919373 |
| Panthert_110.FIN2 | 129.6 | 1.624 | 0.1824 | 0.0055 | 0.02604 | 0.00038 | 0.11534 | 169.9  | 4.7 | 165.7 | 2.4 | 233  | 72 | 165.7 | 2.4 | 2.472042 |
| Panthert_111.FIN2 | 95.3  | 1.18  | 3.528  | 0.075  | 0.2624  | 0.0038  | 0.7387  | 1534   | 17  | 1502  | 19  | 1565 | 30 | 1565  | 30  | 4.025559 |
| Panthert_112.FIN2 | 489   | 1.231 | 0.0994 | 0.0037 | 0.01403 | 0.00026 | 0.33932 | 96.1   | 3.4 | 89.8  | 1.6 | 248  | 78 | 89.8  | 1.6 | 6.555671 |
| Panthert_113.FIN2 | 42.3  | 1.131 | 0.768  | 0.027  | 0.091   | 0.0017  | 0.29631 | 577    | 16  | 561.5 | 9.8 | 684  | 81 | 561.5 | 9.8 | 2.686308 |
| Panthert_114.FIN2 | 48.5  | 0.932 | 0.885  | 0.022  | 0.1004  | 0.0018  | 0.25523 | 644    | 12  | 616   | 11  | 743  | 54 | 616   | 11  | 4.347826 |
| Panthert_115.FIN2 | 64    | 0.948 | 2.078  | 0.033  | 0.1868  | 0.0027  | 0.3056  | 1142   | 11  | 1104  | 15  | 1246 | 34 | 1104  | 15  | 3.327496 |
| Panthert_116.FIN2 | 75.9  | 1.558 | 2.975  | 0.033  | 0.2283  | 0.0027  | 0.40421 | 1400.5 | 8.5 | 1326  | 14  | 1549 | 24 | 1549  | 24  | 14.39638 |
| Panthert_118.FIN2 | 836   | 1.897 | 0.72   | 0.0094 | 0.0871  | 0.001   | 0.61657 | 550.4  | 5.6 | 538.1 | 6.2 | 630  | 26 | 538.1 | 6.2 | 2.234738 |
| Panthert_119.FIN2 | 53.6  | 2.265 | 1.285  | 0.027  | 0.1359  | 0.0022  | 0.54356 | 838    | 12  | 821   | 12  | 923  | 41 | 821   | 12  | 2.02864  |
| Panthert_120.FIN2 | 69.3  | 1.228 | 9.49   | 0.17   | 0.4273  | 0.0084  | 0.74388 | 2385   | 17  | 2293  | 38  | 2482 | 22 | 2482  | 22  | 7.614827 |

## North of the San Rafael Swell

| Sample Name:     |         | 207/235 |         |          |         |          | 206/238  |        |          |          |          | 206/207  |          |          |          |          | Best age |                |  |
|------------------|---------|---------|---------|----------|---------|----------|----------|--------|----------|----------|----------|----------|----------|----------|----------|----------|----------|----------------|--|
| Grain #          | [U] ppm | U/Th    | 207/235 | 2σ error | 206/238 | 2σ error | RHO      | Age Ma | 2σ error | Age (Ma) | 2σ error | Age (Ma) | 2σ error | Age (Ma) | 2σ error | (Ma)     | 2σ error | % Discordance* |  |
| 11UCCR04_1.FIN2  | 70.9    | 0.866   | 4.259   | 0.038    | 0.2936  | 0.0028   | 0.44091  | 1685   | 7.3      | 1661     | 14       | 1719     | 11       | 1719     | 11       | 1719     | 11       | 3.374055       |  |
| 11UCCR04_2.FIN2  | 61.7    | 0.744   | 2.185   | 0.027    | 0.2046  | 0.0028   | 0.50485  | 1175.4 | 8.7      | 1200     | 15       | 1133     | 16       | 1133     | 15       | 1133     | 15       | 2.092905       |  |
| 11UCCR04_3.FIN2  | 168.8   | 3.089   | 4.41    | 0.11     | 0.2621  | 0.0023   | 0.35814  | 1715   | 20       | 1501     | 12       | 2002     | 37       | 2002     | 37       | 2002     | 37       | 25.02498       |  |
| 11UCCR04_4.FIN2  | 28.7    | 0.4932  | 4.397   | 0.086    | 0.3111  | 0.0047   | 0.56573  | 1710   | 16       | 1746     | 23       | 1682     | 17       | 1682     | 17       | 1682     | 17       | 3.804994       |  |
| 11UCCR04_5.FIN2  | 32.6    | 1.436   | 2.029   | 0.039    | 0.1906  | 0.0028   | 0.080526 | 1123   | 13       | 1124     | 15       | 1116     | 26       | 1124     | 15       | 1116     | 26       | 0.089047       |  |
| 11UCCR04_6.FIN2  | 254     | 1.6     | 4.633   | 0.038    | 0.312   | 0.0026   | 0.6673   | 1755.9 | 6.7      | 1750     | 13       | 1753.4   | 9.2      | 1753.4   | 9.2      | 1753.4   | 9.2      | 0.193909       |  |
| 11UCCR04_7.FIN2  | 220.8   | 1.847   | 4.8     | 0.035    | 0.3242  | 0.0024   | 0.67034  | 1784.6 | 6.1      | 1810     | 12       | 1759.4   | 6.6      | 1759.4   | 6.6      | 1759.4   | 6.6      | 2.87598        |  |
| 11UCCR04_8.FIN2  | 126.9   | 0.92    | 0.4597  | 0.0082   | 0.06022 | 0.00077  | 0.11507  | 383.8  | 5.7      | 376.9    | 4.7      | 428      | 31       | 376.9    | 4.7      | 1797811  | 4.7      | 1.797811       |  |
| 11UCCR04_9.FIN2  | 67.5    | 0.556   | 2.931   | 0.033    | 0.2438  | 0.0031   | 0.44954  | 1389.4 | 8.6      | 1406     | 16       | 1360     | 12       | 1360     | 12       | 1360     | 12       | 3.382353       |  |
| 11UCCR04_10.FIN2 | 69      | 1.41    | 1.884   | 0.028    | 0.1821  | 0.0017   | 0.068874 | 1077.1 | 9.3      | 1078.3   | 9.3      | 1074     | 22       | 1078.3   | 9.3      | 0.11141  | 9.3      | 0.11141        |  |
| 11UCCR04_11.FIN2 | 114     | 1.369   | 2.013   | 0.023    | 0.1928  | 0.0017   | 0.33524  | 1121.3 | 7.5      | 1136.6   | 9        | 1097     | 12       | 1136.6   | 9        | 1.364488 | 9        | 1.364488       |  |
| 11UCCR04_12.FIN2 | 124     | 0.937   | 5.303   | 0.035    | 0.3412  | 0.003    | 0.40345  | 1869   | 5.7      | 1892     | 14       | 1844.6   | 9.5      | 1844.6   | 9.5      | 2.569663 | 9.5      | 2.569663       |  |
| 11UCCR04_13.FIN2 | 151     | 0.986   | 2.035   | 0.02     | 0.1926  | 0.0019   | 0.33183  | 1126.7 | 6.7      | 1135     | 10       | 1114     | 13       | 1135     | 10       | 0.736665 | 10       | 0.736665       |  |
| 11UCCR04_14.FIN2 | 90      | 1.548   | 1.905   | 0.024    | 0.1806  | 0.0013   | 0.093633 | 1082.2 | 8.3      | 1070.1   | 7.3      | 1116     | 15       | 1070.1   | 7.3      | 1.118093 | 7.3      | 1.118093       |  |
| 11UCCR04_15.FIN2 | 24.5    | 0.6182  | 1.867   | 0.043    | 0.1795  | 0.0023   | 0.30108  | 1070   | 15       | 1066     | 13       | 1084     | 31       | 1066     | 13       | 0.373832 | 13       | 0.373832       |  |
| 11UCCR04_16.FIN2 | 71      | 1.209   | 2.683   | 0.035    | 0.2273  | 0.0027   | 0.30785  | 1322.9 | 9.6      | 1320     | 14       | 1338     | 19       | 1338     | 19       | 1.345291 | 19       | 1.345291       |  |
| 11UCCR04_17.FIN2 | 98.6    | 1.155   | 1.648   | 0.019    | 0.1657  | 0.0016   | 0.50908  | 989.1  | 7.1      | 988.4    | 8.7      | 992      | 12       | 988.4    | 8.7      | 0.070771 | 8.7      | 0.070771       |  |
| 11UCCR04_18.FIN2 | 261.2   | 1.008   | 4.33    | 0.11     | 0.2727  | 0.0032   | 0.62065  | 1699   | 21       | 1557     | 16       | 1906     | 37       | 1906     | 37       | 18.3106  | 37       | 18.3106        |  |
| 11UCCR04_19.FIN2 | 192     | 0.642   | 12.3    | 0.14     | 0.4511  | 0.0053   | 0.88347  | 2628   | 11       | 2400     | 23       | 2807     | 5.9      | 2807     | 5.9      | 14.49947 | 5.9      | 14.49947       |  |
| 11UCCR04_20.FIN2 | 130     | 2.26    | 3.707   | 0.047    | 0.2571  | 0.0031   | 0.71315  | 1573   | 10       | 1475     | 16       | 1707.8   | 9.6      | 1707.8   | 9.6      | 13.6157  | 9.6      | 13.6157        |  |
| 11UCCR04_21.FIN2 | 236     | 1.77    | 2.007   | 0.017    | 0.1898  | 0.0015   | 0.59596  | 1118.5 | 6.1      | 1120.3   | 8        | 1120.1   | 9        | 1120.3   | 8        | 0.16093  | 8        | 0.16093        |  |
| 11UCCR04_22.FIN2 | 48.1    | 0.616   | 0.838   | 0.019    | 0.0999  | 0.0015   | 0.39953  | 618    | 11       | 613.8    | 8.9      | 639      | 28       | 613.8    | 8.9      | 0.679612 | 8.9      | 0.679612       |  |
| 11UCCR04_23.FIN2 | 127     | 5.8     | 5.343   | 0.051    | 0.331   | 0.0029   | 0.39253  | 1875.1 | 8.1      | 1843     | 14       | 1919     | 11       | 1919     | 11       | 3.960396 | 11       | 3.960396       |  |
| 11UCCR04_24.FIN2 | 210     | 2.061   | 4.603   | 0.036    | 0.3072  | 0.0028   | 0.66501  | 1749.4 | 6.5      | 1726     | 14       | 1776     | 6.9      | 1776     | 6.9      | 2.815315 | 6.9      | 2.815315       |  |
| 11UCCR04_25.FIN2 | 105.3   | 2.726   | 4.365   | 0.039    | 0.306   | 0.003    | 0.57012  | 1707   | 7.4      | 1721     | 15       | 1703     | 9.9      | 1703     | 9.9      | 1.056958 | 9.9      | 1.056958       |  |
| 11UCCR04_26.FIN2 | 135.5   | 1.322   | 2.966   | 0.04     | 0.2348  | 0.0028   | 0.63231  | 1398   | 10       | 1360     | 14       | 1449     | 13       | 1449     | 13       | 6.142167 | 13       | 6.142167       |  |
| 11UCCR04_27.FIN2 | 235     | 0.813   | 2.453   | 0.055    | 0.2002  | 0.0044   | 0.92351  | 1259   | 16       | 1179     | 24       | 1397.7   | 9.4      | 1179     | 24       | 6.354249 | 24       | 6.354249       |  |
| 11UCCR04_28.FIN2 | 35.4    | 1.695   | 2.594   | 0.044    | 0.2217  | 0.0028   | 0.50171  | 1299   | 13       | 1293     | 15       | 1302     | 20       | 1302     | 20       | 0.691244 | 20       | 0.691244       |  |
| 11UCCR04_29.FIN2 | 239     | 8.9     | 0.751   | 0.013    | 0.0893  | 0.0013   | 0.50891  | 568.1  | 7.8      | 551.3    | 7.9      | 637      | 21       | 551.3    | 7.9      | 2.957226 | 21       | 2.957226       |  |
| 11UCCR04_30.FIN2 | 115     | 0.953   | 3.262   | 0.024    | 0.2584  | 0.0021   | 0.58961  | 1474   | 6.1      | 1481     | 11       | 1473.9   | 7.4      | 1473.9   | 7.4      | 0.481715 | 7.4      | 0.481715       |  |
| 11UCCR04_31.FIN2 | 14.66   | 0.643   | 5.141   | 0.07     | 0.3185  | 0.0046   | 0.52906  | 1842   | 12       | 1782     | 23       | 1910     | 16       | 1910     | 16       | 6.701571 | 16       | 6.701571       |  |
| 11UCCR04_32.FIN2 | 114.9   | 0.4947  | 3.92    | 0.031    | 0.2843  | 0.0022   | 0.3525   | 1617.3 | 6.5      | 1613     | 11       | 1627.8   | 9.5      | 1627.8   | 9.5      | 0.909203 | 9.5      | 0.909203       |  |
| 11UCCR04_33.FIN2 | 156.6   | 0.328   | 5.664   | 0.033    | 0.3442  | 0.0024   | 0.62024  | 1925.6 | 5.1      | 1907     | 12       | 1942.7   | 5.4      | 1942.7   | 5.4      | 1.837649 | 5.4      | 1.837649       |  |
| 11UCCR04_34.FIN2 | 121     | 0.407   | 0.875   | 0.015    | 0.1036  | 0.001    | 0.11963  | 637.4  | 8.1      | 635.2    | 5.9      | 648      | 27       | 635.2    | 5.9      | 0.345152 | 27       | 0.345152       |  |
| 11UCCR04_35.FIN2 | 28.8    | 0.829   | 2.759   | 0.043    | 0.2342  | 0.0023   | 0.24099  | 1343   | 11       | 1356     | 12       | 1336     | 22       | 1336     | 22       | 1.497006 | 22       | 1.497006       |  |
| 11UCCR04_36.FIN2 | 161     | 1.215   | 3.176   | 0.032    | 0.2525  | 0.0027   | 0.51471  | 1450.7 | 7.8      | 1451     | 14       | 1443     | 14       | 1443     | 14       | 0.554401 | 14       | 0.554401       |  |
| 11UCCR04_37.FIN2 | 71.7    | 2.496   | 3.785   | 0.077    | 0.2518  | 0.0049   | 0.70545  | 1588   | 16       | 1447     | 25       | 1782     | 18       | 1782     | 18       | 18.7791  | 18       | 18.7791        |  |
| 11UCCR04_38.FIN2 | 41.1    | 1.261   | 5.693   | 0.061    | 0.3529  | 0.0037   | 0.37996  | 1929.5 | 9.2      | 1948     | 18       | 1913     | 11       | 1913     | 11       | 1.829587 | 11       | 1.829587       |  |
| 11UCCR04_39.FIN2 | 72.2    | 1.496   | 3.434   | 0.032    | 0.2639  | 0.0023   | 0.3211   | 1511.6 | 7.4      | 1511     | 12       | 1516     | 11       | 1516     | 11       | 0.329815 | 11       | 0.329815       |  |
| 11UCCR04_40.FIN2 | 142.6   | 0.807   | 0.829   | 0.011    | 0.0993  | 0.0013   | 0.31223  | 612.6  | 6.2      | 610      | 7.7      | 607      | 21       | 610      | 7.7      | 0.424421 | 21       | 0.424421       |  |
| 11UCCR04_41.FIN2 | 88.5    | 0.494   | 3.207   | 0.051    | 0.258   | 0.0037   | 0.68849  | 1460   | 13       | 1482     | 20       | 1431     | 13       | 1431     | 13       | 3.563941 | 13       | 3.563941       |  |
| 11UCCR04_42.FIN2 | 64.6    | 0.791   | 3.164   | 0.033    | 0.2518  | 0.0029   | 0.41556  | 1447.8 | 8.2      | 1447     | 15       | 1434     | 14       | 1434     | 14       | 0.906555 | 14       | 0.906555       |  |
| 11UCCR04_43.FIN2 | 35      | 1.292   | 2.179   | 0.038    | 0.2008  | 0.0028   | 0.13977  | 1173   | 12       | 1183     | 15       | 1152     | 21       | 1183     | 15       | 0.852515 | 21       | 0.852515       |  |
| 11UCCR04_44.FIN2 | 265     | 2.29    | 1.859   | 0.016    | 0.1783  | 0.0014   | 0.51569  | 1066.1 | 5.7      | 1057.4   | 7.9      | 1080     | 10       | 1057.4   | 7.9      | 0.816059 | 10       | 0.816059       |  |
| 11UCCR04_45.FIN2 | 18.27   | 1.139   | 3.22    | 0.1      | 0.2444  | 0.0077   | 0.32439  | 1460   | 25       | 1409     | 40       | 1570     | 49       | 1570     | 49       | 10.25478 | 49       | 10.25478       |  |
| 11UCCR04_46.FIN2 | 90.9    | 0.499   | 1.127   | 0.033    | 0.1245  | 0.0036   | 0.78587  | 765    | 16       | 756      | 21       | 788      | 23       | 756      | 21       | 1.176471 | 23       | 1.176471       |  |
| 11UCCR04_47.FIN2 | 40.4    | 0.836   | 1.965   | 0.027    | 0.1833  | 0.0019   | 0.16788  | 1102.8 | 9.3      | 1085     | 11       | 1148     | 19       | 1085     | 11       | 1.614073 | 19       | 1.614073       |  |
| 11UCCR04_48.FIN2 | 75.5    | 0.466   | 5.169   | 0.046    | 0.3356  | 0.0029   | 0.37794  | 1846.9 | 7.5      | 1865     | 14       | 1823     | 11       | 1823     | 11       | 2.303895 | 11       | 2.303895       |  |
| 11UCCR04_49.FIN2 | 63.7    | 0.932   | 1.907   | 0.024    | 0.1851  | 0.0017   | 0.28097  | 1083.8 | 8.7      | 1094.6   | 9.3      | 1068     | 16       | 1094.6   | 9.3      | 0.996494 | 16       | 0.996494       |  |
| 11UCCR04_50.FIN2 | 74      | 0.635   | 1.942   | 0.027    | 0.1872  | 0.0022   | 0.30471  | 1096   | 9.4      | 1106     | 12       | 1095     | 17       | 1106     | 12       | 0.912409 | 17       | 0.912409       |  |
| 11UCCR04_51.FIN2 | 84.2    | 0.668   | 3.182   | 0.044    | 0.2512  | 0.0029   | 0.49692  | 1452   | 11       | 1444     | 15       | 1465     | 15       | 1465     | 15       | 1.433447 | 15       | 1.433447       |  |
| 11UCCR04_52.FIN2 | 40      | 0.789   | 5.24    | 0.06     | 0.3376  | 0.0028   | 0.44231  | 1859.4 | 9.9      | 1875     | 14       | 1842     | 10       | 1842     | 10       | 1.791531 | 10       | 1.791531       |  |
| 11UCCR04_53.FIN2 | 133     | 0.5565  | 5.177   | 0.035    | 0.3334  | 0.0023   | 0.48418  | 1848.6 | 5.7      | 1856     | 11       | 1849     | 8.6      | 1849     | 8.6      | 0.378583 | 8.6      | 0.378583       |  |
| 11UCCR04_54.FIN2 | 146     | 1.63    | 1.946   | 0.021    | 0.1859  | 0.0016   | 0.52329  | 1097.3 | 6.9      | 1099     | 8.5      | 1093     | 10       | 1099     | 8.5      | 0.154926 | 10       | 0.154926       |  |
| 11UCCR04_55.FIN2 | 253     | 2.41    | 1.733   | 0.021    | 0.1686  | 0.0018   | 0.67059  | 1020.3 | 7.7      | 1004.3   | 9.7      | 1056     | 12       | 1004.3   | 9.7      | 1.568166 | 12       | 1.568166       |  |
| 11UCCR04_56.FIN2 | 84      | 1.086   | 5.646   | 0.081    | 0.351   | 0.0038   | 0.73078  | 1923   | 13       | 1939     | 18       | 1900     | 10       | 1900     | 10       | 2.052632 | 10       | 2.052632       |  |
| 11UCCR04_57.FIN2 | 89      | 1.308   | 1.918   | 0.021    | 0.1844  | 0.0017   | 0.19645  | 1087.7 | 7.6      | 1090.7   | 9.4      | 1089     | 13       | 1090.7   | 9.4      | 0.275811 | 13       | 0.275811       |  |
| 11UCCR04_58.FIN2 | 558     | 1.824   | 2.79    | 0.037    | 0.2264  | 0.0036   | 0.96798  | 1352   | 10       | 1316     | 19       | 1415.6   | 8.9      | 1415.6   | 8.9      | 7.035886 | 8.9      | 7.035886       |  |
| 11UCCR04_59.FIN2 | 219     | 0.575   | 3.869   | 0.03     | 0.282   | 0.002    | 0.50053  | 1606.8 | 6.3      | 1601     | 10       | 1609.4   | 7.3      | 1609.4   | 7.3      | 0.521934 | 7.3      | 0.521934       |  |
| 11UCCR04_60.FIN2 | 429     | 1.976   | 4       | 0.11     | 0.2354  | 0.0057   | 0.95821  | 1629   | 22       | 1361     | 30       | 1999     | 11       | DISC     | DISC     | 31.91596 |          |                |  |
| 11UCCR04_61.FIN2 | 148.4   | 0.919   | 1.32    | 0.       |         |          |          |        |          |          |          |          |          |          |          |          |          |                |  |

|                   |       |        |        |        |         |         |         |        |     |        |     |        |     |        |     |          |
|-------------------|-------|--------|--------|--------|---------|---------|---------|--------|-----|--------|-----|--------|-----|--------|-----|----------|
| 11UCCR04_86.FIN2  | 123.4 | 1.737  | 3.18   | 0.027  | 0.2551  | 0.002   | 0.49512 | 1453.6 | 7   | 1465.8 | 9.9 | 1438.7 | 8.7 | 1438.7 | 8.7 | 1.883645 |
| 11UCCR04_87.FIN2  | 104   | 0.91   | 3.224  | 0.031  | 0.2603  | 0.0024  | 0.49363 | 1463.4 | 7.7 | 1491   | 12  | 1427   | 10  | 1427   | 10  | 4.484933 |
| 11UCCR04_88.FIN2  | 81.8  | 1.35   | 3.305  | 0.031  | 0.2602  | 0.0024  | 0.47041 | 1481.6 | 7.4 | 1491   | 12  | 1478.6 | 9.7 | 1478.6 | 9.7 | 0.838631 |
| 11UCCR04_89.FIN2  | 64.4  | 0.4195 | 5.398  | 0.047  | 0.3479  | 0.0024  | 0.33285 | 1885.9 | 7.5 | 1924   | 12  | 1848   | 11  | 1848   | 11  | 4.112554 |
| 11UCCR04_90.FIN2  | 53.1  | 1.391  | 1.649  | 0.024  | 0.1661  | 0.002   | 0.2169  | 988.5  | 9.1 | 990    | 11  | 983    | 22  | 990    | 11  | 0.151745 |
| 11UCCR04_91.FIN2  | 253   | 1.422  | 1.951  | 0.019  | 0.1881  | 0.0021  | 0.57239 | 1099.2 | 6.6 | 1111   | 11  | 1076   | 13  | 1111   | 11  | 1.073508 |
| 11UCCR04_92.FIN2  | 290   | 1.117  | 0.336  | 0.0052 | 0.04674 | 0.00055 | 0.38929 | 294    | 4   | 294.4  | 3.4 | 322    | 20  | 294.4  | 3.4 | 0.136054 |
| 11UCCR04_93.FIN2  | 40.6  | 0.942  | 1.925  | 0.038  | 0.1885  | 0.0023  | 0.49266 | 1093   | 14  | 1113   | 13  | 1046   | 20  | 1113   | 13  | 1.829826 |
| 11UCCR04_94.FIN2  | 334   | 1.834  | 4.396  | 0.033  | 0.2923  | 0.0023  | 0.6914  | 1712.1 | 6.3 | 1653   | 12  | 1776.7 | 7.8 | 1776.7 | 7.8 | 6.962346 |
| 11UCCR04_95.FIN2  | 90.6  | 1.007  | 4.98   | 0.17   | 0.301   | 0.0051  | 0.2318  | 1812   | 28  | 1696   | 25  | 1945   | 51  | 1945   | 51  | 12.80206 |
| 11UCCR04_96.FIN2  | 48.1  | 0.3745 | 5.442  | 0.057  | 0.3454  | 0.0033  | 0.32718 | 1890.7 | 9   | 1914   | 15  | 1863   | 13  | 1863   | 13  | 2.73752  |
| 11UCCR04_97.FIN2  | 171   | 1.693  | 0.5225 | 0.0082 | 0.06721 | 0.00067 | 0.169   | 426.5  | 5.5 | 419.3  | 4.1 | 471    | 22  | 419.3  | 4.1 | 1.688159 |
| 11UCCR04_98.FIN2  | 810   | 1.31   | 0.428  | 0.04   | 0.0542  | 0.0057  | 0.97408 | 363    | 30  | 339    | 35  | 541    | 89  | 339    | 35  | 6.61157  |
| 11UCCR04_99.FIN2  | 99.3  | 0.797  | 0.596  | 0.012  | 0.07753 | 0.00094 | 0.12604 | 475    | 8.1 | 481.3  | 5.6 | 473    | 28  | 481.3  | 5.6 | 1.326316 |
| 11UCCR04_100.FIN2 | 55.7  | 0.666  | 3.017  | 0.04   | 0.246   | 0.0027  | 0.39973 | 1411   | 10  | 1418   | 14  | 1395   | 14  | 1395   | 14  | 1.648746 |
| 11UCCR04_101.FIN2 | 81.8  | 0.626  | 7.409  | 0.068  | 0.4064  | 0.0036  | 0.75926 | 2161.4 | 8.2 | 2198   | 17  | 2128.1 | 8.5 | 2128.1 | 8.5 | 3.28462  |
| 11UCCR04_102.FIN2 | 61.4  | 0.807  | 1.979  | 0.034  | 0.1867  | 0.0023  | 0.43508 | 1109   | 12  | 1103   | 13  | 1105   | 18  | 1103   | 13  | 0.541028 |
| 11UCCR04_103.FIN2 | 106.5 | 1.257  | 2.059  | 0.029  | 0.1933  | 0.0021  | 0.55241 | 1136.8 | 9.6 | 1140   | 11  | 1124   | 17  | 1140   | 11  | 0.281492 |
| 11UCCR04_104.FIN2 | 245   | 0.675  | 10.1   | 0.12   | 0.424   | 0.0048  | 0.73417 | 2445   | 12  | 2278   | 22  | 2580.6 | 9.1 | 2580.6 | 9.1 | 11.72596 |
| 11UCCR04_105.FIN2 | 112.4 | 1.07   | 1.967  | 0.028  | 0.187   | 0.0025  | 0.54983 | 1104.5 | 9.3 | 1105   | 13  | 1128   | 12  | 1105   | 13  | 0.045269 |
| 11UCCR04_106.FIN2 | 68.9  | 0.598  | 2.942  | 0.044  | 0.2433  | 0.003   | 0.43391 | 1394   | 12  | 1404   | 15  | 1381   | 16  | 1381   | 16  | 1.66546  |
| 11UCCR04_107.FIN2 | 273   | 0.916  | 2.306  | 0.019  | 0.2101  | 0.0015  | 0.69962 | 1213.7 | 5.9 | 1229.1 | 8   | 1188.1 | 6.6 | 1188.1 | 8   | 1.268847 |
| 11UCCR04_108.FIN2 | 58.6  | 1.094  | 2.483  | 0.037  | 0.2214  | 0.0031  | 0.39649 | 1266   | 11  | 1291   | 16  | 1231   | 21  | 1231   | 21  | 4.874086 |
| 11UCCR04_109.FIN2 | 141.4 | 1.092  | 3.044  | 0.029  | 0.2461  | 0.0023  | 0.3703  | 1418.5 | 7.3 | 1418   | 12  | 1430   | 11  | 1430   | 11  | 0.839161 |
| 11UCCR04_110.FIN2 | 161.9 | 4.38   | 4.384  | 0.041  | 0.3072  | 0.0031  | 0.62623 | 1708.8 | 7.8 | 1727   | 15  | 1695   | 10  | 1695   | 10  | 1.887906 |
| 11UCCR04_111.FIN2 | 109   | 0.925  | 1.9    | 0.024  | 0.1808  | 0.0016  | 0.39221 | 1080.3 | 8.4 | 1073.4 | 9   | 1098   | 13  | 1073.4 | 9   | 0.638711 |
| 11UCCR04_112.FIN2 | 305   | 4.86   | 0.5372 | 0.007  | 0.06961 | 0.00082 | 0.42302 | 436.4  | 4.6 | 433.8  | 4.9 | 449    | 17  | 433.8  | 4.9 | 0.595784 |
| 11UCCR04_113.FIN2 | 111   | 2.22   | 3.288  | 0.034  | 0.2651  | 0.002   | 0.53641 | 1477.7 | 8.1 | 1516   | 10  | 1439.2 | 8.5 | 1439.2 | 8.5 | 5.336298 |
| 11UCCR04_114.FIN2 | 132   | 1.29   | 5.362  | 0.062  | 0.3485  | 0.0051  | 0.67949 | 1878   | 9.9 | 1927   | 24  | 1824   | 10  | 1824   | 10  | 0.564693 |
| 11UCCR04_115.FIN2 | 29    | 1.58   | 0.817  | 0.025  | 0.0986  | 0.0019  | 0.21741 | 604    | 14  | 606    | 11  | 670    | 43  | 606    | 11  | 0.331126 |
| 11UCCR04_116.FIN2 | 164   | 1.297  | 5.283  | 0.046  | 0.3403  | 0.004   | 0.59042 | 1866.7 | 7.6 | 1887   | 19  | 1836   | 12  | 1836   | 12  | 2.777778 |
| 11UCCR04_117.FIN2 | 170.6 | 1.613  | 3.242  | 0.027  | 0.2617  | 0.0019  | 0.48261 | 1467   | 6.4 | 1498.4 | 9.7 | 1416   | 11  | 1416   | 11  | 5.819209 |
| 11UCCR04_118.FIN2 | 89.6  | 0.927  | 3.254  | 0.026  | 0.2609  | 0.0021  | 0.49095 | 1469.8 | 6.2 | 1494   | 11  | 1434.4 | 9.3 | 1434.4 | 9.3 | 4.155047 |
| 11UCCR04_119.FIN2 | 90.6  | 13     | 1.986  | 0.026  | 0.1916  | 0.0023  | 0.41983 | 1109.9 | 9   | 1130   | 12  | 1071   | 16  | 1130   | 12  | 1.810974 |
| 11UCCR04_120.FIN2 | 195   | 1.99   | 1.779  | 0.018  | 0.1767  | 0.0015  | 0.50565 | 1038.1 | 6.8 | 1048.8 | 8.1 | 1021   | 11  | 1048.8 | 8.1 | 1.030729 |
| 11UCCR04_121.FIN2 | 51.3  | 0.738  | 13.167 | 0.089  | 0.5098  | 0.0046  | 0.53391 | 2691.3 | 6.4 | 2655   | 20  | 2722.1 | 8   | 2722.1 | 8   | 2.465009 |

|             |       |        |        |        |         |         |         |        |     |        |     |        |     |        |      |          |
|-------------|-------|--------|--------|--------|---------|---------|---------|--------|-----|--------|-----|--------|-----|--------|------|----------|
| 11UCCF03_1  | 138.8 | 1.48   | 0.7435 | 0.0097 | 0.0909  | 0.0011  | 0.70838 | 564.9  | 5.5 | 560.9  | 6.3 | 580    | 13  | 560.9  | 6.3  | 0.70809  |
| 11UCCF03_2  | 132.5 | 1.2    | 0.865  | 0.015  | 0.1028  | 0.0014  | 0.61314 | 633.3  | 7.9 | 630.5  | 8.2 | 636    | 16  | 630.5  | 8.2  | 0.442129 |
| 11UCCF03_3  | 42.3  | 3.221  | 1.844  | 0.028  | 0.1758  | 0.0021  | 0.34557 | 1062   | 10  | 1044   | 12  | 1099   | 24  | 1044   | 12   | 1.694915 |
| 11UCCF03_4  | 329   | 1.53   | 0.888  | 0.013  | 0.1042  | 0.0016  | 0.87462 | 645.4  | 7.3 | 638.8  | 9.2 | 664    | 10  | 638.8  | 9.2  | 1.022622 |
| 11UCCF03_5  | 162   | 1.609  | 4.572  | 0.052  | 0.3116  | 0.0042  | 0.84251 | 1743.5 | 9.5 | 1748   | 21  | 1737.8 | 6.2 | 1737.8 | 6.2  | 0.586949 |
| 11UCCF03_6  | 274.2 | 2.34   | 2.927  | 0.04   | 0.1908  | 0.0026  | 0.91272 | 1388   | 10  | 1125   | 14  | 1821.1 | 7.9 | 1125   | 14   | 18.94813 |
| 11UCCF03_7  | 288   | 1.443  | 0.1032 | 0.0031 | 0.01435 | 0.00022 | 0.39373 | 99.6   | 2.9 | 91.8   | 1.4 | 269    | 42  | 91.8   | 1.4  | 7.831325 |
| 11UCCF03_8  | 375   | 1.473  | 5.33   | 0.19   | 0.3029  | 0.0095  | 0.9892  | 1864   | 33  | 1702   | 48  | 2082   | 8.2 | 2082   | 8.2  | 18.25168 |
| 11UCCF03_9  | 100.7 | 0.782  | 3.015  | 0.032  | 0.2444  | 0.0024  | 0.63881 | 1411   | 8.2 | 1409   | 13  | 1417.8 | 8.3 | 1417.8 | 8.3  | 0.62068  |
| 11UCCF03_10 | 499   | 1      | 0.0896 | 0.0035 | 0.01337 | 0.0005  | 0.8519  | 87     | 3.3 | 85.6   | 3.2 | 162    | 21  | 85.6   | 3.2  | 1.609195 |
| 11UCCF03_11 | 100.6 | 1.466  | 0.6072 | 0.0083 | 0.07623 | 0.00077 | 0.1728  | 481.6  | 5.2 | 473.6  | 4.6 | 521    | 24  | 473.6  | 4.6  | 1.66113  |
| 11UCCF03_12 | 96.7  | 0.8213 | 4.262  | 0.043  | 0.3034  | 0.0041  | 0.70925 | 1688.2 | 8.8 | 1708   | 20  | 1677   | 10  | 1677   | 10   | 1.848539 |
| 11UCCF03_13 | 289   | 1.77   | 0.096  | 0.0061 | 0.01403 | 0.00042 | 0.81646 | 92.9   | 5.5 | 89.8   | 2.7 | 225    | 59  | 89.8   | 2.7  | 3.336921 |
| 11UCCF03_14 | 100.6 | 1.029  | 3.849  | 0.03   | 0.2793  | 0.0019  | 0.47817 | 1602.7 | 6.2 | 1587.9 | 9.7 | 1633.7 | 8   | 1633.7 | 8    | 2.803452 |
| 11UCCF03_15 | 92.5  | 2.323  | 1.629  | 0.021  | 0.1622  | 0.0021  | 0.53386 | 981    | 8   | 969    | 12  | 1013   | 15  | 969    | 12   | 1.223242 |
| 11UCCF03_16 | 255   | 5.62   | 0.5574 | 0.0083 | 0.0723  | 0.0011  | 0.64799 | 449.5  | 5.4 | 450    | 6.4 | 463    | 14  | 450    | 6.4  | 0.111235 |
| 11UCCF03_17 | 1075  | 1.248  | 0.297  | 0.015  | 0.0338  | 0.0015  | 0.79737 | 265    | 12  | 214    | 9.5 | 676    | 52  | 214    | 9.5  | 19.24528 |
| 11UCCF03_18 | 367   | 4.29   | 4.544  | 0.047  | 0.309   | 0.004   | 0.86375 | 1740.1 | 8.3 | 1736   | 20  | 1743.7 | 4.9 | 1743.7 | 4.9  | 0.44159  |
| 11UCCF03_19 | 306   | 1.57   | 2.813  | 0.032  | 0.2324  | 0.0028  | 0.77045 | 1358.4 | 8.4 | 1347   | 15  | 1383.1 | 8.8 | 1383.1 | 8.8  | 2.610079 |
| 11UCCF03_20 | 176.2 | 0.708  | 2.21   | 0.031  | 0.1984  | 0.0029  | 0.77952 | 1183.5 | 9.7 | 1166   | 16  | 1215   | 10  | 1166   | 16   | 1.478665 |
| 11UCCF03_21 | 144.8 | 1.218  | 1.969  | 0.025  | 0.1832  | 0.0022  | 0.7911  | 1104.2 | 8.5 | 1084   | 12  | 1142.5 | 8.6 | 1084   | 12   | 1.829379 |
| 11UCCF03_22 | 189   | 1.375  | 3.614  | 0.037  | 0.2716  | 0.0033  | 0.79273 | 1552   | 8.2 | 1549   | 17  | 1568.1 | 6.9 | 1568.1 | 6.9  | 1.218035 |
| 11UCCF03_23 | 58.3  | 0.1862 | 4.241  | 0.069  | 0.2652  | 0.0021  | 0.50333 | 1680   | 13  | 1516   | 11  | 1911   | 21  | 1911   | 21   | 20.66981 |
| 11UCCF03_24 | 105.6 | 1.443  | 1.331  | 0.018  | 0.1351  | 0.0015  | 0.67911 | 860.1  | 8   | 816.6  | 8.4 | 976    | 14  | 816.6  | 8.4  | 5.057551 |
| 11UCCF03_25 | 191   | 0.955  | 0.089  | 0.0025 | 0.01357 | 0.00019 | 0.32948 | 87     | 2.3 | 86.9   | 1.2 | 173    | 34  | 86.9   | 1.2  | 0.114943 |
| 11UCCF03_26 | 441   | 1.003  | 0.309  | 0.062  | 0.01573 | 0.00075 | 0.95578 | 256    | 42  | 100.6  | 4.7 | 1960   | 250 | DISC   | DISC | 60.70313 |
| 11UCCF03_27 | 338   | 2.92   | 2.31   | 0.13   | 0.192   | 0.0081  | 0.9713  | 1212   | 39  | 1136   | 43  | 1327   | 43  | 1136   | 43   | 6.270627 |
| 11UCCF03_28 | 84.1  | 1.074  | 1.088  | 0.033  | 0.1191  | 0.0013  | 0.32569 | 747    | 16  | 725.3  | 7.6 | 782    | 40  | 725.3  | 7.6  | 2.904953 |
| 11UCCF03_29 | 106.9 | 1.048  | 1.708  | 0.016  | 0.1703  | 0.0013  | 0.38718 | 1011.3 | 5.8 | 1013.6 | 7.3 | 1027   | 12  | 1013.6 | 7.3  | 0.22743  |
| 11UCCF03_30 | 98.7  | 0.716  | 5.881  | 0.061  | 0.35    | 0.0034  | 0.76277 | 1957.7 | 8.9 | 1934   | 16  | 1988.7 | 5.7 | 1988.7 | 5.7  | 2.750541 |
| 11UCCF03_31 | 28.2  | 1.54   | 1.8    | 0.15   | 0.156   | 0.01    | 0.87176 | 1042   | 56  | 932    | 59  | 1328   | 36  | 932    | 59   | 10.55662 |
| 11UCCF03_32 | 104.1 | 0.676  | 1.609  | 0.019  | 0.159   | 0.0018  | 0.67039 | 973.3  | 7.4 | 951    | 9.8 | 1040   | 10  | 951    | 9.8  | 2.291174 |
| 11UCCF03_33 | 82.2  | 0.416  | 3.645  | 0.063  | 0.2527  | 0.0061  | 0.86974 | 1561   | 14  | 1451   | 31  | 1715   | 17  | 1715   | 17   | 15.39359 |
| 11UCCF03_34 | 83    | 0.524  | 4.274  | 0.036  | 0.3001  | 0.0027  | 0.70426 | 1687.9 | 6.8 | 1692   | 14  | 1689.4 | 7.6 | 1689.4 | 7.6  | 0.153901 |
| 11UCCF03_35 | 60.4  | 0.512  | 0.806  | 0.021  | 0.0956  | 0.0018  | 0.65965 | 600    | 12  | 588    | 10  | 647    | 26  | 588    | 10   |          |

|              |       |        |        |        |         |         |          |        |     |        |     |        |     |        |      |           |
|--------------|-------|--------|--------|--------|---------|---------|----------|--------|-----|--------|-----|--------|-----|--------|------|-----------|
| 11UCCF03_54  | 114.7 | 1.0374 | 3.854  | 0.026  | 0.2777  | 0.0017  | 0.64931  | 1605.2 | 5.5 | 1579.9 | 8.3 | 1633.8 | 6.8 | 1633.8 | 6.8  | 3.299057  |
| 11UCCF03_55  | 755   | 2.12   | 0.093  | 0.013  | 0.01282 | 0.00085 | 0.95777  | 89     | 11  | 82.1   | 5.4 | 171    | 59  | 82.1   | 5.4  | 7.752809  |
| 11UCCF03_56  | 184   | 1.333  | 4.37   | 0.29   | 0.1927  | 0.0061  | 0.72599  | 1704   | 55  | 1142   | 31  | 2470   | 68  | DISC   | DISC | 32.98122  |
| 11UCCF03_57  | 231   | 0.846  | 0.0945 | 0.0021 | 0.01438 | 0.0002  | 0.30913  | 91.6   | 2   | 92.1   | 1.3 | 142    | 25  | 92.1   | 1.3  | 0.545852  |
| 11UCCF03_59  | 272   | 1.518  | 0.0966 | 0.0021 | 0.01465 | 0.00017 | 0.18728  | 93.6   | 1.9 | 93.8   | 1.1 | 140    | 23  | 93.8   | 1.1  | 0.213675  |
| 11UCCF03_60  | 180.7 | 0.978  | 0.0955 | 0.0026 | 0.0145  | 0.0002  | 0.20213  | 92.5   | 2.5 | 92.8   | 1.3 | 176    | 28  | 92.8   | 1.3  | 0.324324  |
| 11UCCF03_61  | 92.2  | 0.62   | 5.106  | 0.035  | 0.3276  | 0.0021  | 0.63547  | 1836.8 | 5.9 | 1827   | 10  | 1849.9 | 6.4 | 1849.9 | 6.4  | 1.237905  |
| 11UCCF03_62  | 134   | 1.54   | 0.6885 | 0.0087 | 0.08501 | 0.00071 | 0.3729   | 531.6  | 5.2 | 525.9  | 4.2 | 558    | 15  | 525.9  | 4.2  | 0.1072235 |
| 11UCCF03_63  | 75.6  | 0.737  | 3.182  | 0.061  | 0.247   | 0.005   | 0.8885   | 1451   | 15  | 1422   | 26  | 1481   | 13  | 1481   | 13   | 3.983795  |
| 11UCCF03_64  | 106   | 1.227  | 1.907  | 0.041  | 0.1763  | 0.004   | 0.82835  | 1082   | 14  | 1046   | 22  | 1146   | 17  | 1046   | 22   | 3.327172  |
| 11UCCF03_65  | 305   | 1.971  | 2.23   | 0.016  | 0.1977  | 0.0016  | 0.72793  | 1190.9 | 4.9 | 1162.7 | 8.7 | 1240.7 | 6.8 | 1162.7 | 8.7  | 2.367957  |
| 11UCCF03_66  | 134.9 | 0.92   | 3.272  | 0.025  | 0.2528  | 0.0023  | 0.64725  | 1474.2 | 5.9 | 1454   | 12  | 1503.1 | 7.5 | 1503.1 | 7.5  | 3.266582  |
| 11UCCF03_67  | 290   | 1.69   | 4.7    | 0.14   | 0.2885  | 0.0073  | 0.95195  | 1761   | 25  | 1632   | 37  | 1931   | 12  | 1931   | 12   | 15.48421  |
| 11UCCF03_68  | 124   | 2.67   | 1.699  | 0.016  | 0.1678  | 0.0016  | 0.57256  | 1008.5 | 6   | 1000   | 8.8 | 1030   | 14  | 1000   | 8.8  | 0.842836  |
| 11UCCF03_69  | 26.4  | 1.26   | 1.654  | 0.031  | 0.1655  | 0.0019  | 0.07083  | 990    | 12  | 987    | 10  | 1010   | 25  | 987    | 10   | 0.30303   |
| 11UCCF03_70  | 16.4  | 0.403  | 0.831  | 0.063  | 0.0425  | 0.0032  | 0.74167  | 611    | 36  | 268    | 20  | 2208   | 69  | DISC   | DISC | 56.13748  |
| 11UCCF03_71  | 400   | 10.4   | 1.51   | 0.23   | 0.121   | 0.016   | 0.9953   | 841    | 98  | 726    | 89  | 1180   | 95  | 726    | 89   | 13.6742   |
| 11UCCF03_72  | 13.07 | 0.1886 | 11.25  | 0.19   | 0.4482  | 0.0079  | 0.50909  | 2547   | 15  | 2386   | 35  | 2673   | 16  | 2673   | 16   | 10.737    |
| 11UCCF03_73  | 161   | 1.641  | 0.2098 | 0.0046 | 0.02997 | 0.00038 | 0.23425  | 193.8  | 3.7 | 190.3  | 2.4 | 225    | 28  | 190.3  | 2.4  | 1.805986  |
| 11UCCF03_74  | 85.6  | 1.231  | 2.424  | 0.026  | 0.2105  | 0.0026  | 0.55654  | 1249.2 | 7.7 | 1231   | 14  | 1268   | 10  | 1268   | 10   | 2.917981  |
| 11UCCF03_75  | 66.7  | 0.5387 | 4.764  | 0.059  | 0.3124  | 0.0057  | 0.71332  | 1778   | 10  | 1752   | 28  | 1803   | 13  | 1803   | 13   | 2.828619  |
| 11UCCF03_76  | 285.5 | 0.481  | 0.735  | 0.015  | 0.0843  | 0.0012  | 0.77082  | 559.8  | 8.8 | 521.8  | 7.3 | 706    | 22  | 521.8  | 7.3  | 6.788139  |
| 11UCCF03_77  | 223.6 | 1.244  | 0.1122 | 0.0036 | 0.01539 | 0.00019 | 0.29819  | 107.9  | 3.2 | 98.4   | 1.2 | 341    | 54  | 98.4   | 1.2  | 8.804449  |
| 11UCCF03_78  | 66.4  | 1.404  | 0.841  | 0.014  | 0.0995  | 0.0013  | 0.4393   | 619.3  | 7.8 | 611.7  | 7.5 | 663    | 23  | 611.7  | 7.5  | 1.227192  |
| 11UCCF03_79  | 366.7 | 1.143  | 0.0951 | 0.0021 | 0.01435 | 0.00024 | 0.40407  | 92.2   | 1.9 | 91.9   | 1.5 | 164    | 28  | 91.9   | 1.5  | 0.32538   |
| 11UCCF03_80  | 88    | 1.151  | 0.788  | 0.016  | 0.093   | 0.001   | 0.039311 | 589.3  | 8.8 | 573.4  | 6   | 613    | 32  | 573.4  | 6    | 2.698116  |
| 11UCCF03_81  | 126.5 | 1.501  | 6.06   | 0.071  | 0.3612  | 0.005   | 0.61922  | 1984   | 10  | 1991   | 24  | 1961.4 | 8.2 | 1961.4 | 8.2  | 1.509126  |
| 11UCCF03_82  | 671   | 1.49   | 3.6    | 0.17   | 0.2194  | 0.0099  | 0.99466  | 1547   | 38  | 1275   | 53  | 1933.5 | 7.6 | DISC   | DISC | 34.05741  |
| 11UCCF03_83  | 214   | 2.306  | 0.8531 | 0.0092 | 0.10135 | 0.00085 | 0.3963   | 626.8  | 5.2 | 622.3  | 5   | 647    | 16  | 622.3  | 5    | 0.717932  |
| 11UCCF03_84  | 196   | 3.48   | 4.902  | 0.061  | 0.3168  | 0.004   | 0.9843   | 1797   | 13  | 1773   | 20  | 1834.2 | 6.9 | 1834.2 | 6.9  | 3.336605  |
| 11UCCF03_85  | 352   | 3.39   | 2.992  | 0.07   | 0.2385  | 0.0045  | 0.98104  | 1403   | 19  | 1378   | 24  | 1450   | 12  | 1450   | 12   | 4.965517  |
| 11UCCF03_87  | 133.9 | 1.374  | 2.001  | 0.021  | 0.1879  | 0.0025  | 0.59242  | 1115.6 | 7.1 | 1110   | 13  | 1121   | 14  | 1110   | 13   | 0.501972  |
| 11UCCF03_88  | 93    | 0.742  | 7.74   | 0.28   | 0.3825  | 0.0059  | 0.74604  | 2195   | 30  | 2092   | 26  | 2298   | 35  | 2298   | 35   | 8.964317  |
| 11UCCF03_89  | 331   | 1.338  | 0.2772 | 0.0067 | 0.03914 | 0.00086 | 0.8477   | 248.1  | 5.4 | 247.4  | 5.3 | 256    | 18  | 247.4  | 5.3  | 0.282144  |
| 11UCCF03_91  | 285   | 1.864  | 2.336  | 0.023  | 0.2073  | 0.0024  | 0.70795  | 1222.8 | 7   | 1216   | 12  | 1229.4 | 9.5 | 1229.4 | 9.5  | 1.089963  |
| 11UCCF03_92  | 223   | 1.7    | 0.0952 | 0.0025 | 0.01475 | 0.00027 | 0.33604  | 92.6   | 2.4 | 94.4   | 1.7 | 153    | 25  | 94.4   | 1.7  | 1.943844  |
| 11UCCF03_93  | 355   | 0.926  | 0.13   | 0.006  | 0.01599 | 0.00028 | 0.10455  | 123.8  | 5.4 | 102.3  | 1.8 | 595    | 98  | 102.3  | 1.8  | 17.36672  |
| 11UCCF03_94  | 547   | 1.3    | 0.0905 | 0.0056 | 0.01313 | 0.00068 | 0.85986  | 87.7   | 5.2 | 84.1   | 4.3 | 217    | 39  | 84.1   | 4.3  | 4.104903  |
| 11UCCF03_95  | 4.05  | 3.86   | 16.01  | 0.74   | 0.175   | 0.0077  | 0.74319  | 2862   | 45  | 1037   | 42  | 4617   | 28  | DISC   | DISC | 63.7666   |
| 11UCCF03_96  | 30.68 | 0.593  | 11.14  | 0.14   | 0.4834  | 0.0063  | 0.73209  | 2536   | 11  | 2541   | 27  | 2530.7 | 9.7 | 2530.7 | 9.7  | 0.407002  |
| 11UCCF03_97  | 399   | 1.006  | 0.1014 | 0.0035 | 0.01524 | 0.00031 | 0.63367  | 97.9   | 3.2 | 97.5   | 2   | 207    | 30  | 97.5   | 2    | 0.40858   |
| 11UCCF03_98  | 401   | 2.02   | 1.98   | 0.14   | 0.1787  | 0.0031  | 0.44127  | 1113   | 50  | 1060   | 17  | 1239   | 90  | 1060   | 17   | 4.761905  |
| 11UCCF03_100 | 243   | 1.665  | 4.82   | 0.031  | 0.3199  | 0.0021  | 0.66872  | 1789.1 | 5.5 | 1789   | 10  | 1791.1 | 5.6 | 1791.1 | 5.6  | 0.117246  |
| 11UCCF03_101 | 234.9 | 2.146  | 5.628  | 0.054  | 0.3438  | 0.0029  | 0.71598  | 1919.9 | 8.3 | 1905   | 14  | 1938.5 | 8   | 1938.5 | 8    | 1.72814   |
| 11UCCF03_102 | 818   | 8.35   | 1.78   | 0.14   | 0.1237  | 0.0094  | 0.99526  | 1030   | 54  | 747    | 54  | 1690.9 | 9.8 | 747    | 54   | 27.47573  |
| 11UCCF03_103 | 297   | 1.137  | 0.0936 | 0.0025 | 0.01389 | 0.00036 | 0.73818  | 90.8   | 2.3 | 88.9   | 2.3 | 253    | 34  | 88.9   | 2.3  | 2.092511  |
| 11UCCF03_104 | 167   | 0.916  | 4.182  | 0.048  | 0.2934  | 0.0038  | 0.69342  | 1671.4 | 9.2 | 1658   | 19  | 1684   | 10  | 1684   | 10   | 1.543943  |
| 11UCCF03_105 | 164   | 1.416  | 0.68   | 0.0087 | 0.08356 | 0.00098 | 0.64838  | 526.5  | 5.2 | 517.3  | 5.8 | 574    | 18  | 517.3  | 5.8  | 1.747388  |
| 11UCCF03_106 | 287   | 1.36   | 0.523  | 0.0067 | 0.06713 | 0.00066 | 0.52402  | 427    | 4.4 | 418.8  | 4   | 480    | 20  | 418.8  | 4    | 1.920375  |
| 11UCCF03_107 | 144.9 | 2.14   | 4.659  | 0.049  | 0.3098  | 0.003   | 0.6704   | 1759.4 | 8.7 | 1739   | 15  | 1774   | 10  | 1774   | 10   | 1.972943  |
| 11UCCF03_108 | 73.5  | 1.082  | 0.764  | 0.012  | 0.0927  | 0.0012  | 0.27372  | 576.9  | 7.1 | 571.3  | 6.9 | 621    | 22  | 571.3  | 6.9  | 0.970705  |
| 11UCCF03_109 | 51.5  | 1.023  | 2.619  | 0.033  | 0.219   | 0.0023  | 0.58577  | 1305.3 | 9.3 | 1276   | 12  | 1359   | 13  | 1359   | 13   | 6.107432  |
| 11UCCF03_110 | 410   | 1.921  | 0.3357 | 0.0065 | 0.04689 | 0.00071 | 0.81177  | 293.7  | 5   | 295.4  | 4.4 | 290    | 15  | 295.4  | 4.4  | 0.578822  |
| 11UCCF03_111 | 221.5 | 0.628  | 2.813  | 0.022  | 0.2346  | 0.0019  | 0.61368  | 1359.4 | 5.7 | 1358.5 | 9.7 | 1357.1 | 8.6 | 1357.1 | 8.6  | 0.103161  |
| 11UCCF03_112 | 162.7 | 1.263  | 0.5891 | 0.007  | 0.07617 | 0.00066 | 0.38532  | 470.1  | 4.5 | 473.2  | 4   | 465    | 13  | 473.2  | 4    | 0.659434  |
| 11UCCF03_113 | 61.4  | 0.782  | 0.114  | 0.0053 | 0.01497 | 0.00032 | 0.30987  | 109.4  | 4.9 | 95.8   | 2.1 | 485    | 68  | 95.8   | 2.1  | 12.43144  |
| 11UCCF03_114 | 320   | 1.319  | 0.0926 | 0.0021 | 0.0141  | 0.0002  | 0.57389  | 89.9   | 1.9 | 90.2   | 1.3 | 163    | 20  | 90.2   | 1.3  | 0.333704  |
| 11UCCF03_115 | 626   | 1.64   | 0.0877 | 0.0037 | 0.01307 | 0.00052 | 0.90813  | 85.3   | 3.4 | 83.7   | 3.3 | 155    | 20  | 83.7   | 3.3  | 1.875733  |
| 11UCCF03_116 | 180.9 | 0.89   | 11.37  | 0.14   | 0.4578  | 0.0058  | 0.84394  | 2557   | 11  | 2429   | 26  | 2650.8 | 8.4 | 2650.8 | 8.4  | 8.367285  |
| 11UCCF03_118 | 94.9  | 1.057  | 3.426  | 0.029  | 0.265   | 0.0025  | 0.62251  | 1510.8 | 6.6 | 1515   | 13  | 1497.7 | 9.1 | 1497.7 | 9.1  | 1.155104  |
| 11UCCF03_119 | 58.5  | 1.978  | 3.683  | 0.044  | 0.277   | 0.0035  | 0.54618  | 1568.7 | 9.8 | 1576   | 18  | 1561   | 16  | 1561   | 16   | 0.960922  |
| 11UCCF03_120 | 75.1  | 2.107  | 1.976  | 0.021  | 0.1869  | 0.0016  | 0.27524  | 1106.8 | 7.3 | 1104.4 | 8.9 | 1122   | 16  | 1104.4 | 8.9  | 0.216841  |
| 11UCCF03_121 | 98.9  | 1.74   | 5.064  | 0.088  | 0.3443  | 0.005   | 0.66085  | 1832   | 14  | 1907   | 24  | 1746   | 15  | 1746   | 15   | 9.221077  |
| 11UCCF03_122 | 211   | 1.107  | 0.0958 | 0.0025 | 0.01423 | 0.00019 | 0.099443 | 92.8   | 2.3 | 91.1   | 1.2 | 194    | 39  | 91.1   | 1.2  | 1.831897  |
| 11UCCF03_123 | 690   | 2.08   | 0.0882 | 0.0047 | 0.01349 | 0.00072 | 0.91764  | 85.7   | 4.4 | 86.3   | 4.6 | 115    | 16  | 86.3   | 4.6  | 0.700117  |

|               |       |        |        |        |         |         |          |        |     |       |     |      |    |       |     |          |
|---------------|-------|--------|--------|--------|---------|---------|----------|--------|-----|-------|-----|------|----|-------|-----|----------|
| Emery_1.FIN2  | 188.4 | 0.669  | 4.876  | 0.055  | 0.3091  | 0.0038  | 0.71269  | 1797.4 | 9.5 | 1736  | 19  | 1847 | 16 | 1847  | 16  | 6.009746 |
| Emery_2.FIN2  | 338   | 1.725  | 0.1009 | 0.0032 | 0.01541 | 0.00027 | 0.048166 | 97.6   | 3   | 98.6  | 1.7 | 111  | 72 | 98.6  | 1.7 | 1.02459  |
| Emery_3.FIN2  | 123.6 | 2.56   | 2.889  | 0.08   | 0.218   | 0.0056  | 0.8005   | 1380   | 22  | 1270  | 29  | 1555 | 37 | 1555  | 37  | 18.32797 |
| Emery_4.FIN2  | 255.9 | 2.855  | 2.672  | 0.028  | 0.2277  | 0.0022  | 0.50022  | 1322.4 | 7.5 | 1322  | 12  | 1318 | 17 | 1318  | 17  | 0.30349  |
| Emery_5.FIN2  | 279   | 3.73   | 4.761  | 0.071  | 0.3154  | 0.0054  | 0.77487  | 1777   | 12  | 1766  | 27  | 1784 | 22 | 1784  | 22  | 1.008969 |
| Emery_6.FIN2  | 175.3 | 0.947  | 4.051  | 0.044  | 0.2902  | 0.0033  | 0.66193  | 1645.7 | 8.7 | 1642  | 17  | 1645 | 16 | 1645  | 16  | 0.182371 |
| Emery_7.FIN2  | 246   | 2.219  | 0.2091 | 0.0063 | 0.02963 | 0.0004  | 0.005837 | 192.5  | 5.3 | 188.2 | 2.5 | 251  | 71 | 188.2 | 2.5 | 2.233766 |
| Emery_8.FIN2  | 1280  | 5.1    | 0.445  | 0.022  | 0.0516  | 0.0027  | 0.83443  | 376    | 15  | 324   | 17  | 637  | 60 | 324   | 17  | 13.82979 |
| Emery_8.FIN2  | 427   | 0.798  | 0.877  | 0.013  | 0.1053  | 0.0019  | 0.76379  | 639.1  | 7   | 645   | 11  | 597  | 34 | 645   | 11  | 0.923173 |
| Emery_9.FIN2  | 184.3 | 1.287  | 0.841  | 0.016  | 0.0995  | 0.0015  | 0.53795  | 619    | 8.7 | 611.2 | 8.9 | 654  | 35 | 611.2 | 8.9 | 1.260097 |
| Emery_10.FIN2 | 131.7 | 1.32   | 3.875  | 0.047  | 0.2795  | 0.0032  | 0.55578  | 1607.7 | 9.9 | 1589  | 16  | 1637 | 22 | 1637  | 22  | 2.932193 |
| Emery_11.FIN2 | 74.4  | 1.679  | 0.507  | 0.019  | 0.067   | 0.0015  | 0.14948  | 420    | 11  | 417.9 | 8.8 | 410  | 86 | 417.9 | 8.8 | 0.5      |
| Emery_12.FIN2 | 137.5 | 1.714  | 0.123  | 0.0053 | 0.01858 | 0.00045 | 0.010778 | 117.6  | 4.8 | 118.7 | 2.9 | 88   | 99 | 118.7 | 2.9 | 0.935374 |
| Emery_13.FIN2 | 430   | 1.493  | 0.0913 | 0.0028 | 0.01407 | 0.00024 | 0.10842  | 88.6   | 2.6 | 90.1  | 1.5 | 45   | 63 | 90.1  | 1.5 | 1.693002 |
| Emery_14.FIN2 | 167.1 | 0.8918 | 1.743  | 0.024  | 0.1719  | 0.0024  | 0.32891  | 1024   | 9   | 1022  | 13  | 1043 | 30 | 1043  | 30  | 2.013423 |
| Emery_15.FIN2 | 145.2 | 1.2    | 2.921  | 0.059  | 0.2101  | 0.0045  | 0.6473   | 1386   | 15  | 1229  | 24  | 1632 | 32 | 1632  | 32  | 24.69363 |
| Emery_16.FIN2 | 131.9 | 1.278  | 3.918  | 0.05   | 0.28    | 0.0038  | 0.71854  | 1618   | 10  | 1591  | 19  | 1644 | 18 | 1644  | 18  | 3.223844 |
| Emery_17.FIN2 | 122   | 2.121  | 2.151  | 0.041  | 0.1969  | 0.0039  | 0.29614  | 1165   | 13  | 1158  | 21  | 1141 | 45 | 1141  | 45  | 1.489921 |
| Emery_18.FIN2 | 151.8 | 1.332  | 4.586  | 0.055  | 0.317   | 0.0043  | 0.61067  | 1746   | 10  | 1775  | 21  | 1725 | 21 | 1725  | 21  | 2.898551 |
| Emery_19.FIN2 | 63.7  | 1.825  | 3.687  | 0.068  | 0.2587  | 0.0034  | 0.65644  | 1569   | 14  | 1483  | 18  | 1675 | 29 | 1675  | 29  | 11.46269 |
| Emery_20.FIN2 | 272   | 3.46   | 0.998  | 0.015  | 0.1153  | 0.0017  | 0.54494  | 702.2  | 7.6 | 703.3 | 9.6 | 723  | 30 | 703.3 | 9.6 | 0.156651 |
| Emery_21.FIN2 | 590   | 10.98  | 5.675  | 0.075  | 0.342   | 0.0041  | 0.79478  | 1927   | 11  | 1896  | 20  | 1972 | 15 | 1972  | 15  | 3.853955 |
| Emery_23.FIN2 | 573   | 1.469  | 0.1002 | 0.0032 | 0.01502 | 0.00032 | 0.33656  | 96.9   | 3   | 96.1  | 2   | 98   | 55 | 96.1  | 2   | 0.825593 |
| Emery_24.FIN2 | 296   | 2.02   | 5.678  | 0.087  | 0.3434  | 0.006   | 0.7648   | 1927   | 13  | 1902  | 29  | 1958 | 21 | 1958  | 21  | 2.860061 |



|                |       |       |        |        |         |         |          |        |     |       |     |      |         |       |     |          |
|----------------|-------|-------|--------|--------|---------|---------|----------|--------|-----|-------|-----|------|---------|-------|-----|----------|
| Emery_25.FIN2  | 68.4  | 2.27  | 2.155  | 0.062  | 0.1876  | 0.0031  | 0.67918  | 1163   | 20  | 1108  | 17  | 1263 | 59      | 1263  | 59  | 12.27237 |
| Emery_26.FIN2  | 877   | 2.78  | 1.836  | 0.016  | 0.1785  | 0.0019  | 0.65057  | 1058.8 | 6   | 1059  | 10  | 1056 | 20      | 1056  | 20  | 0.284091 |
| Emery_27.FIN2  | 434   | 1.741 | 0.1028 | 0.0035 | 0.01533 | 0.00028 | 0.43134  | 99.3   | 3.2 | 98.1  | 1.8 | 187  | 66      | 98.1  | 1.8 | 1.208459 |
| Emery_28.FIN2  | 156   | 0.67  | 0.769  | 0.016  | 0.0913  | 0.0014  | 0.26043  | 578.7  | 9.4 | 562.9 | 8.1 | 667  | 55      | 562.9 | 8.1 | 2.730257 |
| Emery_29.FIN2  | 585   | 1.611 | 0.0983 | 0.003  | 0.01424 | 0.00029 | 0.37992  | 95.2   | 2.7 | 91.1  | 1.8 | 198  | 65      | 91.1  | 1.8 | 4.306723 |
| Emery_30.FIN2  | 235   | 1.304 | 0.1049 | 0.003  | 0.01571 | 0.00026 | 0.21006  | 101.2  | 2.8 | 100.5 | 1.7 | 136  | 67      | 100.5 | 1.7 | 0.6917   |
| Emery_32.FIN2  | 417   | 0.93  | 1.415  | 0.016  | 0.1454  | 0.002   | 0.65813  | 896.1  | 6.5 | 875   | 11  | 929  | 20      | 929   | 20  | 5.812702 |
| Emery_33.FIN2  | 38.2  | 3.03  | 1.96   | 0.061  | 0.1772  | 0.0047  | 0.38266  | 1103   | 22  | 1051  | 26  | 1172 | 70      | 1172  | 70  | 10.32423 |
| Emery_34.FIN2  | 110.5 | 0.752 | 1.916  | 0.051  | 0.1445  | 0.0033  | 0.73205  | 1087   | 17  | 869   | 19  | 1540 | 33 DISC | DISC  |     | 43.57143 |
| Emery_35.FIN2  | 286   | 5     | 3.051  | 0.033  | 0.2441  | 0.0029  | 0.68212  | 1419.8 | 8.2 | 1407  | 15  | 1429 | 18      | 1429  | 18  | 1.539538 |
| Emery_37.FIN2  | 47.7  | 1.222 | 4.843  | 0.062  | 0.321   | 0.0046  | 0.52142  | 1791   | 11  | 1794  | 22  | 1796 | 25      | 1796  | 25  | 0.111359 |
| Emery_38.FIN2  | 70.9  | 0.989 | 3.877  | 0.057  | 0.2799  | 0.0045  | 0.38824  | 1609   | 11  | 1590  | 23  | 1645 | 33      | 1645  | 33  | 3.343465 |
| Emery_40.FIN2  | 336   | 4.12  | 6.552  | 0.058  | 0.3654  | 0.0044  | 0.57727  | 2054.3 | 7.9 | 2007  | 21  | 2110 | 17      | 2110  | 17  | 4.881517 |
| Emery_41.FIN2  | 260   | 2.502 | 1.375  | 0.019  | 0.1406  | 0.0017  | 0.48144  | 877.7  | 8.2 | 847.9 | 9.4 | 954  | 26      | 847.9 | 9.4 | 3.395238 |
| Emery_42.FIN2  | 24.8  | 0.663 | 13.26  | 0.23   | 0.51    | 0.01    | 0.67364  | 2696   | 16  | 2654  | 43  | 2718 | 23      | 2718  | 23  | 2.354673 |
| Emery_43.FIN2  | 182   | 2.849 | 4.724  | 0.041  | 0.3125  | 0.0025  | 0.57719  | 1771.8 | 7.4 | 1753  | 12  | 1791 | 14      | 1791  | 14  | 2.12172  |
| Emery_44.FIN2  | 488   | 9.25  | 1.495  | 0.027  | 0.1506  | 0.0026  | 0.63832  | 930    | 12  | 904   | 15  | 981  | 33      | 981   | 33  | 7.849134 |
| Emery_45.FIN2  | 127.4 | 1.9   | 0.797  | 0.015  | 0.0963  | 0.0014  | 0.21266  | 594.5  | 8.5 | 592.3 | 8.2 | 600  | 44      | 592.3 | 8.2 | 0.370059 |
| Emery_46.FIN2  | 364   | 2.27  | 1.999  | 0.021  | 0.1856  | 0.0022  | 0.54337  | 1114.6 | 7   | 1097  | 12  | 1151 | 25      | 1151  | 25  | 4.691573 |
| Emery_47.FIN2  | 181   | 1.264 | 3.961  | 0.066  | 0.2829  | 0.0051  | 0.69857  | 1624   | 13  | 1605  | 25  | 1653 | 22      | 1653  | 22  | 2.903811 |
| Emery_48.FIN2  | 166.7 | 0.947 | 4.184  | 0.091  | 0.2773  | 0.0055  | 0.85388  | 1669   | 18  | 1577  | 28  | 1801 | 31      | 1801  | 31  | 12.43753 |
| Emery_49.FIN2  | 219.4 | 0.935 | 3.776  | 0.052  | 0.2702  | 0.0036  | 0.67573  | 1587   | 11  | 1541  | 18  | 1642 | 22      | 1642  | 22  | 6.151035 |
| Emery_50.FIN2  | 365   | 2.69  | 2.447  | 0.039  | 0.2151  | 0.0038  | 0.62068  | 1255   | 12  | 1256  | 20  | 1266 | 29      | 1266  | 29  | 0.789889 |
| Emery_51.FIN2  | 777   | 1.515 | 0.8519 | 0.0078 | 0.0971  | 0.0011  | 0.55529  | 625.5  | 4.3 | 597.2 | 6.4 | 723  | 20      | 597.2 | 6.4 | 4.52438  |
| Emery_52.FIN2  | 311   | 1.769 | 0.1006 | 0.0036 | 0.01467 | 0.00039 | 0.25171  | 97.3   | 3.3 | 93.8  | 2.5 | 183  | 75      | 93.8  | 2.5 | 3.597122 |
| Emery_53.FIN2  | 102.5 | 0.838 | 2.387  | 0.04   | 0.2119  | 0.0027  | 0.57478  | 1241   | 11  | 1239  | 15  | 1255 | 28      | 1255  | 28  | 1.2749   |
| Emery_54.FIN2  | 398.4 | 0.971 | 0.101  | 0.003  | 0.01502 | 0.00025 | 0.18624  | 97.6   | 2.8 | 96.1  | 1.6 | 154  | 63      | 96.1  | 1.6 | 1.536885 |
| Emery_55.FIN2  | 168   | 1.833 | 0.8165 | 0.0096 | 0.0991  | 0.0012  | 0.44728  | 606.6  | 5.5 | 609   | 6.8 | 586  | 27      | 609   | 6.8 | 0.395648 |
| Emery_56.FIN2  | 55.9  | 1.169 | 2.871  | 0.051  | 0.2256  | 0.0038  | 0.5119   | 1374   | 13  | 1311  | 20  | 1483 | 30      | 1483  | 30  | 11.59811 |
| Emery_57.FIN2  | 1404  | 1.829 | 0.161  | 0.026  | 0.01664 | 0.00034 | 0.75422  | 148    | 21  | 106.4 | 2.2 | 610  | 200     | 106.4 | 2.2 | 28.10811 |
| Emery_58.FIN2  | 449   | 2.64  | 4.169  | 0.055  | 0.2803  | 0.004   | 0.8964   | 1670   | 11  | 1595  | 21  | 1764 | 11      | 1764  | 11  | 9.580499 |
| Emery_59.FIN2  | 288   | 2.487 | 3.285  | 0.04   | 0.255   | 0.0035  | 0.78592  | 1476.5 | 9.5 | 1464  | 18  | 1493 | 18      | 1493  | 18  | 1.942398 |
| Emery_60.FIN2  | 132   | 2.723 | 1.635  | 0.084  | 0.1616  | 0.0086  | 0.64033  | 982    | 33  | 965   | 48  | 1022 | 92      | 1022  | 92  | 5.577299 |
| Emery_60.FIN2  | 56.2  | 1.27  | 2.949  | 0.08   | 0.2367  | 0.0062  | 0.42063  | 1392   | 20  | 1369  | 33  | 1439 | 44      | 1439  | 44  | 4.864489 |
| Emery_61.FIN2  | 186   | 3.29  | 0.685  | 0.015  | 0.0838  | 0.0013  | 0.45861  | 529.3  | 8.9 | 518.6 | 7.8 | 562  | 47      | 518.6 | 7.8 | 2.021538 |
| Emery_62.FIN2  | 246.5 | 0.75  | 0.817  | 0.01   | 0.09785 | 0.00092 | 0.10875  | 606.2  | 5.6 | 601.7 | 5.4 | 627  | 32      | 601.7 | 5.4 | 0.742329 |
| Emery_63.FIN2  | 223.4 | 1.273 | 0.112  | 0.0048 | 0.01601 | 0.00036 | 0.17261  | 107.7  | 4.4 | 102.4 | 2.3 | 217  | 92      | 102.4 | 2.3 | 4.921077 |
| Emery_65.FIN2  | 280   | 2.32  | 0.515  | 0.012  | 0.0671  | 0.0011  | 0.57014  | 421.3  | 7.8 | 419.6 | 6.8 | 452  | 47      | 419.6 | 6.8 | 0.403513 |
| Emery_66.FIN2  | 635   | 7.34  | 0.819  | 0.011  | 0.0975  | 0.0012  | 0.6253   | 608.1  | 5.8 | 599.9 | 6.9 | 611  | 23      | 599.9 | 6.9 | 1.348462 |
| Emery_67.FIN2  | 518   | 1.851 | 0.5217 | 0.0089 | 0.0677  | 0.0011  | 0.64681  | 426    | 6   | 422.2 | 6.8 | 441  | 32      | 422.2 | 6.8 | 0.892019 |
| Emery_68.FIN2  | 181.7 | 2.009 | 3.834  | 0.052  | 0.277   | 0.0047  | 0.77262  | 1599   | 11  | 1575  | 23  | 1627 | 22      | 1627  | 22  | 3.196066 |
| Emery_69.FIN2  | 852   | 2.196 | 1.591  | 0.048  | 0.1558  | 0.0043  | 0.7216   | 966    | 19  | 933   | 24  | 1033 | 38      | 1033  | 38  | 9.680542 |
| Emery_69.FIN2  | 337   | 1.919 | 1.74   | 0.033  | 0.1704  | 0.0046  | 0.70549  | 1023   | 12  | 1014  | 25  | 1027 | 37      | 1027  | 37  | 1.265823 |
| Emery_70.FIN2  | 104.9 | 1.86  | 12.53  | 0.14   | 0.5002  | 0.0069  | 0.76211  | 2644   | 11  | 2613  | 30  | 2662 | 14      | 2662  | 14  | 1.840721 |
| Emery_71.FIN2  | 135   | 2.506 | 2.883  | 0.042  | 0.23    | 0.0033  | 0.61181  | 1377   | 11  | 1337  | 18  | 1436 | 23      | 1436  | 23  | 6.89415  |
| Emery_72.FIN2  | 364   | 3.35  | 0.713  | 0.013  | 0.0881  | 0.0016  | 0.65606  | 546    | 7.9 | 544.3 | 9.3 | 573  | 28      | 544.3 | 9.3 | 0.311355 |
| Emery_73.FIN2  | 190   | 2.569 | 4.645  | 0.057  | 0.3068  | 0.0045  | 0.69209  | 1758   | 10  | 1724  | 22  | 1786 | 18      | 1786  | 18  | 3.471445 |
| Emery_74.FIN2  | 454   | 1.258 | 0.1014 | 0.0039 | 0.01508 | 0.00063 | 0.53104  | 97.9   | 3.6 | 96.5  | 4   | 278  | 83      | 96.5  | 4   | 1.430031 |
| Emery_75.FIN2  | 151   | 2.53  | 6.013  | 0.069  | 0.3586  | 0.0042  | 0.73716  | 1976.8 | 9.9 | 1975  | 20  | 1981 | 14      | 1981  | 14  | 0.302877 |
| Emery_76.FIN2  | 110.7 | 1.024 | 0.1654 | 0.007  | 0.02486 | 0.00065 | 0.27895  | 155.1  | 6.1 | 158.3 | 4.1 | 101  | 90      | 158.3 | 4.1 | 2.063185 |
| Emery_77.FIN2  | 259.7 | 2.35  | 14.72  | 0.21   | 0.5101  | 0.0072  | 0.86744  | 2799   | 13  | 2656  | 31  | 2888 | 12      | 2888  | 12  | 8.033241 |
| Emery_78.FIN2  | 46.9  | 0.718 | 0.644  | 0.023  | 0.0818  | 0.0021  | 0.25447  | 503    | 14  | 506   | 13  | 502  | 84      | 506   | 13  | 0.596421 |
| Emery_79.FIN2  | 372   | 3.148 | 1.559  | 0.029  | 0.151   | 0.0031  | 0.59347  | 953    | 12  | 906   | 17  | 1070 | 32      | 1070  | 32  | 15.3271  |
| Emery_80.FIN2  | 400   | 20.19 | 0.543  | 0.022  | 0.0704  | 0.0024  | 0.72124  | 440    | 14  | 438   | 14  | 435  | 73      | 438   | 14  | 0.454545 |
| Emery_81.FIN2  | 677   | 1.32  | 0.1058 | 0.0031 | 0.01585 | 0.00028 | 0.55529  | 102.1  | 2.8 | 101.4 | 1.8 | 156  | 63      | 101.4 | 1.8 | 0.685602 |
| Emery_82.FIN2  | 438   | 3.22  | 4.709  | 0.071  | 0.306   | 0.0069  | 0.69709  | 1769   | 12  | 1719  | 34  | 1809 | 26      | 1809  | 26  | 4.975124 |
| Emery_83.FIN2  | 180   | 2.09  | 3.973  | 0.051  | 0.2866  | 0.0045  | 0.60753  | 1628   | 11  | 1624  | 22  | 1628 | 24      | 1628  | 24  | 0.2457   |
| Emery_84.FIN2  | 136   | 1.96  | 3.087  | 0.074  | 0.177   | 0.0049  | 0.74255  | 1428   | 18  | 1057  | 27  | 2027 | 37 DISC | DISC  |     | 47.85397 |
| Emery_85.FIN2  | 540   | 2.269 | 0.1721 | 0.0047 | 0.02628 | 0.00069 | 0.46995  | 161.1  | 4   | 167.2 | 4.4 | 109  | 60      | 167.2 | 4.4 | 3.786468 |
| Emery_86.FIN2  | 1430  | 2.685 | 0.1119 | 0.0028 | 0.01592 | 0.00033 | 0.64581  | 107.7  | 2.5 | 101.8 | 2.1 | 223  | 41      | 101.8 | 2.1 | 5.47818  |
| Emery_87.FIN2  | 173   | 1.603 | 3.261  | 0.067  | 0.2076  | 0.0038  | 0.82941  | 1470   | 16  | 1216  | 20  | 1869 | 19 DISC | DISC  |     | 34.93847 |
| Emery_88.FIN2  | 1164  | 14.19 | 13.35  | 0.18   | 0.5113  | 0.0081  | 0.67474  | 2703   | 13  | 2666  | 33  | 2734 | 22      | 2734  | 22  | 2.487198 |
| Emery_89.FIN2  | 231.4 | 2.567 | 2.707  | 0.044  | 0.2305  | 0.0036  | 0.69712  | 1329   | 12  | 1337  | 19  | 1329 | 23      | 1329  | 23  | 0.601956 |
| Emery_90.FIN2  | 832   | 2.43  | 0.503  | 0.011  | 0.063   | 0.0014  | 0.85832  | 413.6  | 7.2 | 393.8 | 8.4 | 541  | 30      | 393.8 | 8.4 | 4.787234 |
| Emery_91.FIN2  | 114.6 | 1.005 | 0.0976 | 0.0061 | 0.01435 | 0.00046 | 0.099217 | 94.2   | 5.7 | 91.8  | 3   | 140  | 130     | 91.8  | 3   | 2.547771 |
| Emery_92.FIN2  | 166   | 2.184 | 1.777  | 0.026  | 0.1755  | 0.0027  | 0.51652  | 1037.4 | 9.2 | 1042  | 15  | 1028 | 28      | 1028  | 28  | 1.361868 |
| Emery_93.FIN2  | 291   | 1.646 | 3.663  | 0.072  | 0.2602  | 0.0053  | 0.75315  | 1561   | 16  | 1493  | 28  | 1657 | 29      | 1657  | 29  | 9.897405 |
| Emery_94.FIN2  | 552   | 17.2  | 1.776  | 0.056  | 0.1736  | 0.0057  | 0.51994  | 1036   | 21  | 1032  | 31  | 1022 | 69      | 1022  | 69  | 0.978474 |
| Emery_101.FIN2 | 100.7 | 3.04  | 1.976  | 0.08   | 0.1635  | 0.0052  | 0.97602  | 972    | 29  | 954   | 29  | 1086 | 28      | 1086  | 28  | 12.1547  |
| Emery_94.FIN2  | 187.4 | 2.233 | 2.426  | 0.048  | 0.2019  | 0.0034  | 0.66512  | 1249   | 14  | 1185  | 18  | 1347 | 30      | 1347  | 30  | 12.02673 |
| Emery_95.FIN2  | 119.1 | 0.912 | 3.95   | 0.069  | 0.2777  | 0.0063  | 0.70312  | 1622   | 14  | 1578  | 32  | 1670 | 35      | 1670  | 35  | 5.508982 |
| Emery_96.FIN2  | 103.6 | 3.99  | 0.1155 | 0.0066 | 0.01726 | 0.00046 | 0.10087  | 110.6  | 6   | 110.3 | 2.9 | 130  | 120     | 110.3 | 2.9 | 0.271248 |
| Emery_97.FIN2  | 236   | 4.22  | 4.604  | 0.069  | 0.3168  | 0.0056  | 0.72053  | 1749   | 12  | 1773  | 27  | 1737 | 23      | 1737  | 23  | 2.072539 |
| Emery_98.FIN2  | 97.5  | 1.819 | 1.682  | 0.043  | 0.      |         |          |        |     |       |     |      |         |       |     |          |

|                |     |       |       |       |        |        |         |        |     |       |     |      |    |       |     |          |
|----------------|-----|-------|-------|-------|--------|--------|---------|--------|-----|-------|-----|------|----|-------|-----|----------|
| Emery_116.FIN2 | 137 | 0.945 | 0.429 | 0.011 | 0.0561 | 0.0012 | 0.45486 | 363.1  | 8.2 | 351.6 | 7.3 | 392  | 61 | 351.6 | 7.3 | 3.167172 |
| Emery_117.FIN2 | 726 | 4.72  | 3.618 | 0.051 | 0.2528 | 0.0037 | 0.80484 | 1553   | 11  | 1453  | 19  | 1695 | 21 | 1695  | 21  | 14.27729 |
| Emery_118.FIN2 | 429 | 1.174 | 0.69  | 0.058 | 0.0797 | 0.0012 | 0.6031  | 518    | 25  | 494   | 7.4 | 570  | 83 | 494   | 7.4 | 4.633205 |
| Emery_119.FIN2 | 224 | 1.974 | 4.388 | 0.049 | 0.3017 | 0.0033 | 0.74139 | 1709.3 | 9.3 | 1699  | 17  | 1727 | 14 | 1727  | 14  | 1.621309 |

|                  |       |        |        |        |         |         |          |        |     |        |      |        |     |        |      |          |
|------------------|-------|--------|--------|--------|---------|---------|----------|--------|-----|--------|------|--------|-----|--------|------|----------|
| 11UCCF04_1.FIN2  | 473   | 2.35   | 3.313  | 0.053  | 0.2432  | 0.0036  | 0.92781  | 1484   | 12  | 1403   | 19   | 1611.8 | 5.4 | 1611.8 | 5.4  | 12.95446 |
| 11UCCF04_2.FIN2  | 145   | 1.325  | 0.1013 | 0.0038 | 0.01529 | 0.00032 | 0.24224  | 97.8   | 3.5 | 97.8   | 2    | 231    | 37  | 97.8   | 2    | 0        |
| 11UCCF04_3.FIN2  | 62.3  | 1.442  | 1.59   | 0.022  | 0.1631  | 0.0023  | 0.45606  | 966.9  | 8.3 | 974    | 13   | 953    | 16  | 974    | 13   | 0.734306 |
| 11UCCF04_4.FIN2  | 80.9  | 2.09   | 0.733  | 0.012  | 0.08888 | 0.00095 | 0.18736  | 557.8  | 7.1 | 548.9  | 5.6  | 568    | 26  | 548.9  | 5.6  | 1.595554 |
| 11UCCF04_5.FIN2  | 60.8  | 0.87   | 2.874  | 0.045  | 0.2364  | 0.0023  | 0.36376  | 1374   | 12  | 1368   | 12   | 1383   | 18  | 1383   | 18   | 1.084599 |
| 11UCCF04_6.FIN2  | 86.3  | 1.556  | 4.874  | 0.064  | 0.3216  | 0.0049  | 0.95066  | 1797   | 11  | 1791   | 26   | 1799   | 10  | 1799   | 10   | 0.444691 |
| 11UCCF04_7.FIN2  | 168.7 | 1.016  | 0.114  | 0.0038 | 0.01715 | 0.00038 | 0.10993  | 109.5  | 3.5 | 109.6  | 2.4  | 220    | 41  | 109.6  | 2.4  | 0.091324 |
| 11UCCF04_8.FIN2  | 383   | 1.168  | 0.0967 | 0.0024 | 0.01418 | 0.00019 | 0.28637  | 93.7   | 2.2 | 90.8   | 1.2  | 212    | 34  | 90.8   | 1.2  | 3.094984 |
| 11UCCF04_9.FIN2  | 759   | 1.527  | 0.097  | 0.0015 | 0.01469 | 0.00016 | 0.3736   | 94     | 1.4 | 94     | 1    | 138    | 19  | 94     | 1    | 0        |
| 11UCCF04_10.FIN2 | 7.27  | 0.1468 | 6.22   | 0.3    | 0.0741  | 0.0038  | 0.7152   | 1999   | 44  | 460    | 23   | 4527   | 34  | DISC   | DISC | 76.98849 |
| 11UCCF04_12.FIN2 | 247.1 | 1.985  | 0.093  | 0.0027 | 0.01381 | 0.0002  | 0.20214  | 90.2   | 2.5 | 88.4   | 1.3  | 213    | 36  | 88.4   | 1.3  | 1.995565 |
| 11UCCF04_13.FIN2 | 91.5  | 1.013  | 0.0934 | 0.0037 | 0.01448 | 0.00029 | 0.046879 | 90.6   | 3.5 | 92.7   | 1.8  | 213    | 40  | 92.7   | 1.8  | 2.317881 |
| 11UCCF04_14.FIN2 | 122   | 1.451  | 8.79   | 0.15   | 0.3761  | 0.0058  | 0.90638  | 2316   | 15  | 2057   | 27   | 2558.1 | 6.4 | 2558.1 | 6.4  | 19.58876 |
| 11UCCF04_15.FIN2 | 174   | 1.126  | 0.1118 | 0.0067 | 0.01447 | 0.00034 | 0.271    | 107.2  | 6   | 92.6   | 2.1  | 630    | 120 | 92.6   | 2.1  | 13.6194  |
| 11UCCF04_17.FIN2 | 507   | 1.475  | 0.0929 | 0.0022 | 0.01364 | 0.00017 | 0.69718  | 90.2   | 2.1 | 87.3   | 1.1  | 184    | 23  | 87.3   | 1.1  | 3.215078 |
| 11UCCF04_19.FIN2 | 206   | 3.58   | 0.5112 | 0.0071 | 0.06629 | 0.00076 | 0.48574  | 419    | 4.8 | 413.7  | 4.6  | 436    | 17  | 413.7  | 4.6  | 1.264916 |
| 11UCCF04_20.FIN2 | 524   | 1.529  | 0.0928 | 0.002  | 0.01387 | 0.0002  | 0.61442  | 90.1   | 1.9 | 88.8   | 1.3  | 157    | 21  | 88.8   | 1.3  | 1.442841 |
| 11UCCF04_21.FIN2 | 328   | 0.958  | 0.111  | 0.008  | 0.01457 | 0.00024 | 0.75755  | 106.4  | 6.9 | 93.2   | 1.5  | 375    | 74  | 93.2   | 1.5  | 12.40602 |
| 11UCCF04_23.FIN2 | 484   | 1.594  | 0.0918 | 0.0023 | 0.01376 | 0.0002  | 0.35263  | 89.2   | 2.1 | 88.1   | 1.3  | 196    | 36  | 88.1   | 1.3  | 1.233184 |
| 11UCCF04_25.FIN2 | 37.6  | 1.206  | 2.548  | 0.057  | 0.2031  | 0.0028  | 0.074387 | 1280   | 14  | 1191   | 15   | 1422   | 23  | 1191   | 15   | 6.953125 |
| 11UCCF04_26.FIN2 | 122.8 | 0.488  | 0.2451 | 0.0051 | 0.03544 | 0.00045 | 0.22446  | 222.4  | 4.2 | 224.5  | 2.8  | 223    | 30  | 224.5  | 2.8  | 0.944245 |
| 11UCCF04_27.FIN2 | 338   | 1.373  | 0.1033 | 0.0024 | 0.01532 | 0.00021 | 0.31331  | 99.7   | 2.2 | 98     | 1.3  | 171    | 27  | 98     | 1.3  | 1.705115 |
| 11UCCF04_28.FIN2 | 369   | 1.56   | 0.0919 | 0.0027 | 0.01401 | 0.00028 | 0.66872  | 89.3   | 2.5 | 89.7   | 1.8  | 164    | 28  | 89.7   | 1.8  | 0.447928 |
| 11UCCF04_29.FIN2 | 93.9  | 2.12   | 2.282  | 0.036  | 0.2014  | 0.0026  | 0.72657  | 1206   | 11  | 1183   | 14   | 1247   | 11  | 1183   | 14   | 1.907131 |
| 11UCCF04_31.FIN2 | 394   | 2.64   | 1.69   | 0.013  | 0.1665  | 0.0013  | 0.73328  | 1005.3 | 5   | 992.7  | 7.1  | 1032.8 | 6.9 | 992.7  | 7.1  | 1.253357 |
| 11UCCF04_32.FIN2 | 450   | 1.517  | 2.983  | 0.024  | 0.2399  | 0.002   | 0.82042  | 1402.8 | 6.3 | 1386   | 10   | 1417.6 | 8.1 | 1417.6 | 8.1  | 2.22912  |
| 11UCCF04_33.FIN2 | 216.1 | 1.335  | 0.0964 | 0.0027 | 0.01431 | 0.00021 | 0.11591  | 93.7   | 2.4 | 91.6   | 1.3  | 193    | 28  | 91.6   | 1.3  | 2.241195 |
| 11UCCF04_34.FIN2 | 205   | 1.347  | 0.1036 | 0.0051 | 0.0145  | 0.00035 | 0.38409  | 99.9   | 4.7 | 92.8   | 2.2  | 344    | 43  | 92.8   | 2.2  | 7.107107 |
| 11UCCF04_35.FIN2 | 563   | 0.858  | 0.1002 | 0.0021 | 0.01458 | 0.00017 | 0.4578   | 96.9   | 2   | 93.3   | 1.1  | 202    | 23  | 93.3   | 1.1  | 3.71517  |
| 11UCCF04_36.FIN2 | 412   | 1.283  | 0.101  | 0.0038 | 0.01414 | 0.00033 | 0.78168  | 97.6   | 3.5 | 90.5   | 2.1  | 285    | 40  | 90.5   | 2.1  | 7.27459  |
| 11UCCF04_37.FIN2 | 46.5  | 1.195  | 15.14  | 0.13   | 0.5393  | 0.0054  | 0.53134  | 2824.2 | 7.9 | 2780   | 23   | 2850.7 | 8.3 | 2850.7 | 8.3  | 2.480093 |
| 11UCCF04_38.FIN2 | 222   | 2.01   | 5.62   | 0.51   | 0.264   | 0.017   | 0.97672  | 1864   | 81  | 1501   | 88   | 2326   | 62  | DISC   | DISC | 35.46862 |
| 11UCCF04_39.FIN2 | 349   | 15.1   | 2.8    | 0.48   | 0.167   | 0.019   | 0.99734  | 1270   | 130 | 980    | 100  | 1670   | 150 | 980    | 100  | 22.83465 |
| 11UCCF04_40.FIN2 | 156   | 1.579  | 1.361  | 0.022  | 0.1395  | 0.0024  | 0.65498  | 871.3  | 9.7 | 843    | 14   | 951    | 17  | 843    | 14   | 3.24802  |
| 11UCCF04_41.FIN2 | 142.3 | 0.868  | 3.996  | 0.032  | 0.2859  | 0.0021  | 0.63099  | 1633.1 | 6.5 | 1621   | 10   | 1639.6 | 8.3 | 1639.6 | 8.3  | 1.134423 |
| 11UCCF04_42.FIN2 | 25    | 1.5    | 12.6   | 0.19   | 0.4945  | 0.0062  | 0.50538  | 2648   | 14  | 2589   | 27   | 2699   | 16  | 2699   | 16   | 4.075584 |
| 11UCCF04_43.FIN2 | 102.5 | 1.003  | 1.865  | 0.019  | 0.1805  | 0.0014  | 0.42615  | 1069.4 | 6.7 | 1069.7 | 7.5  | 1067   | 12  | 1069.7 | 7.5  | 0.028053 |
| 11UCCF04_44.FIN2 | 132.6 | 0.567  | 0.5227 | 0.0081 | 0.06764 | 0.00062 | 0.24575  | 427.4  | 5.3 | 421.9  | 3.7  | 461    | 18  | 421.9  | 3.7  | 1.286851 |
| 11UCCF04_45.FIN2 | 242   | 0.917  | 0.0996 | 0.0031 | 0.01468 | 0.00024 | 0.51237  | 96.3   | 2.9 | 94     | 1.5  | 262    | 40  | 94     | 1.5  | 2.38837  |
| 11UCCF04_46.FIN2 | 221   | 0.722  | 2.235  | 0.035  | 0.1901  | 0.0033  | 0.43794  | 1192   | 11  | 1121   | 18   | 1346   | 25  | 1121   | 18   | 5.956376 |
| 11UCCF04_47.FIN2 | 346   | 0.969  | 0.1044 | 0.0021 | 0.01586 | 0.00021 | 0.21876  | 101.1  | 1.9 | 101.5  | 1.3  | 172    | 25  | 101.5  | 1.3  | 0.395648 |
| 11UCCF04_48.FIN2 | 302   | 1.235  | 1.691  | 0.013  | 0.1674  | 0.0014  | 0.66445  | 1004.7 | 5   | 997.4  | 7.7  | 1019   | 9   | 997.4  | 7.7  | 0.726585 |
| 11UCCF04_49.FIN2 | 243   | 1.078  | 0.098  | 0.003  | 0.01403 | 0.00024 | 0.15687  | 94.9   | 2.7 | 89.8   | 1.5  | 245    | 41  | 89.8   | 1.5  | 5.374078 |
| 11UCCF04_50.FIN2 | 170   | 3.89   | 3.439  | 0.075  | 0.2484  | 0.0054  | 0.84575  | 1510   | 17  | 1429   | 28   | 1628   | 16  | 1628   | 16   | 12.22359 |
| 11UCCF04_51.FIN2 | 83    | 0.67   | 0.284  | 0.02   | 0.0388  | 0.0015  | 0.89971  | 252    | 15  | 245.2  | 9.3  | 369    | 65  | 245.2  | 9.3  | 2.698413 |
| 11UCCF04_52.FIN2 | 736   | 2.001  | 0.0968 | 0.0034 | 0.0139  | 0.00048 | 0.89988  | 93.7   | 3.1 | 89     | 3.1  | 238    | 29  | 89     | 3.1  | 5.016009 |
| 11UCCF04_54.FIN2 | 451   | 1.464  | 0.0948 | 0.0018 | 0.01384 | 0.00014 | 0.21196  | 92.2   | 1.7 | 88.58  | 0.89 | 212    | 26  | 88.58  | 0.89 | 3.926247 |
| 11UCCF04_55.FIN2 | 233   | 1.149  | 3.157  | 0.02   | 0.252   | 0.0016  | 0.50627  | 1447.2 | 5.1 | 1448.6 | 8.5  | 1446.9 | 8.1 | 1446.9 | 8.1  | 0.117493 |
| 11UCCF04_56.FIN2 | 74.8  | 0.64   | 0.887  | 0.015  | 0.1037  | 0.0012  | 0.021498 | 644    | 8.1 | 635.9  | 7    | 703    | 27  | 635.9  | 7    | 1.257764 |
| 11UCCF04_57.FIN2 | 201   | 1.097  | 0.0977 | 0.003  | 0.01463 | 0.00021 | 0.014909 | 94.9   | 2.8 | 93.6   | 1.3  | 205    | 31  | 93.6   | 1.3  | 1.369863 |
| 11UCCF04_58.FIN2 | 51    | 2.064  | 1.437  | 0.022  | 0.1479  | 0.0016  | 0.34115  | 903.8  | 9.2 | 888.9  | 8.9  | 970    | 19  | 888.9  | 8.9  | 1.648595 |
| 11UCCF04_59.FIN2 | 408   | 1.646  | 0.0944 | 0.0041 | 0.01454 | 0.00051 | 0.70486  | 92     | 3.7 | 93.1   | 3.3  | 276    | 42  | 93.1   | 3.3  | 1.195652 |
| 11UCCF04_60.FIN2 | 270.9 | 0.891  | 0.0943 | 0.002  | 0.01417 | 0.00018 | 0.25888  | 91.8   | 1.7 | 90.7   | 1.1  | 161    | 29  | 90.7   | 1.1  | 1.198257 |
| 11UCCF04_63.FIN2 | 145.7 | 0.853  | 3.962  | 0.046  | 0.284   | 0.0029  | 0.50164  | 1625.9 | 9.3 | 1611   | 14   | 1645   | 13  | 1645   | 13   | 2.066869 |
| 11UCCF04_65.FIN2 | 258.1 | 1.602  | 1.273  | 0.094  | 0.1024  | 0.007   | 0.98966  | 825    | 44  | 626    | 42   | 1446   | 15  | 626    | 42   | 24.12121 |
| 11UCCF04_66.FIN2 | 24.6  | 1.282  | 3.219  | 0.051  | 0.2487  | 0.0043  | 0.23355  | 1461   | 12  | 1431   | 22   | 1526   | 19  | 1526   | 19   | 6.225426 |
| 11UCCF04_67.FIN2 | 149.3 | 0.546  | 0.976  | 0.014  | 0.1121  | 0.0012  | 0.40793  | 691.8  | 7.3 | 684.9  | 7.1  | 708    | 16  | 684.9  | 7.1  | 0.997398 |
| 11UCCF04_68.FIN2 | 175.3 | 1.015  | 2.31   | 0.022  | 0.2082  | 0.0016  | 0.36878  | 1215   | 6.8 | 1219.1 | 8.8  | 1219   | 11  | 1219   | 11   | 0.008203 |
| 11UCCF04_69.FIN2 | 260   | 1.221  | 0.1049 | 0.0039 | 0.01448 | 0.00024 | 0.21013  | 101.7  | 3.5 | 92.7   | 1.5  | 407    | 66  | 92.7   | 1.5  | 8.849558 |
| 11UCCF04_70.FIN2 | 184   | 2.15   | 0.1152 | 0.0058 | 0.01401 | 0.00024 | 0.24627  | 110.4  | 5.3 | 89.7   | 1.5  | 629    | 83  | 89.7   | 1.5  | 18.75    |
| 11UCCF04_72.FIN2 | 438   | 1.029  | 0.0905 | 0.0037 | 0.01366 | 0.00036 | 0.87104  | 87.8   | 3.4 | 87.4   | 2.3  | 175    | 24  | 87.4   | 2.3  | 0.455581 |
| 11UCCF04_73.FIN2 | 177   | 3      | 6.19   | 0.09   | 0.3627  | 0.0055  | 0.873    | 2002   | 13  | 1994   |      |        |     |        |      |          |

|                   |       |         |        |        |         |         |          |        |     |        |     |        |     |        |     |          |
|-------------------|-------|---------|--------|--------|---------|---------|----------|--------|-----|--------|-----|--------|-----|--------|-----|----------|
| 11UCCF04_99.FIN2  | 243   | 1.107   | 0.749  | 0.026  | 0.0876  | 0.0012  | 0.68965  | 571    | 14  | 541.2  | 7   | 680    | 43  | 541.2  | 7   | 5.218914 |
| 11UCCF04_100.FIN2 | 157   | 2.99    | 1.481  | 0.042  | 0.1203  | 0.0031  | 0.16715  | 925    | 18  | 732    | 18  | 1394   | 72  | 732    | 18  | 20.86486 |
| 11UCCF04_101.FIN2 | 45.4  | 1.302   | 3.296  | 0.045  | 0.257   | 0.0029  | 0.4225   | 1480   | 10  | 1474   | 15  | 1487   | 16  | 1487   | 16  | 0.874243 |
| 11UCCF04_102.FIN2 | 79.4  | 1.111   | 3.191  | 0.048  | 0.2438  | 0.0034  | 0.56933  | 1454   | 12  | 1406   | 18  | 1538   | 13  | 1538   | 13  | 8.582575 |
| 11UCCF04_103.FIN2 | 16.41 | 0.442   | 3.962  | 0.083  | 0.2732  | 0.0056  | 0.36067  | 1625   | 17  | 1556   | 28  | 1704   | 26  | 1704   | 26  | 8.685446 |
| 11UCCF04_104.FIN2 | 133.3 | 1.826   | 1.26   | 0.016  | 0.1358  | 0.0016  | 0.40675  | 827.4  | 7.3 | 820.8  | 9.1 | 851    | 14  | 820.8  | 9.1 | 0.797679 |
| 11UCCF04_105.FIN2 | 159   | 1.23    | 1.901  | 0.021  | 0.1751  | 0.0017  | 0.25768  | 1080.8 | 7.3 | 1040.2 | 9.3 | 1186   | 23  | 1040.2 | 9.3 | 3.756477 |
| 11UCCF04_106.FIN2 | 271   | 1.008   | 0.836  | 0.013  | 0.0996  | 0.0016  | 0.85231  | 617.8  | 7.7 | 612.1  | 9.3 | 649    | 17  | 612.1  | 9.3 | 0.922629 |
| 11UCCF04_107.FIN2 | 55.9  | 2.274   | 4.577  | 0.069  | 0.304   | 0.0043  | 0.60617  | 1744   | 12  | 1710   | 21  | 1773   | 14  | 1773   | 14  | 3.553299 |
| 11UCCF04_108.FIN2 | 7.26  | -143900 | 0.77   | 0.047  | 0.0858  | 0.0031  | 0.019614 | 572    | 25  | 530    | 19  | 769    | 72  | 530    | 19  | 7.342657 |
| 11UCCF04_110.FIN2 | 121.8 | 1.056   | 4.306  | 0.055  | 0.3026  | 0.0036  | 0.72921  | 1694   | 11  | 1704   | 18  | 1687   | 12  | 1687   | 12  | 1.007706 |
| 11UCCF04_111.FIN2 | 55.8  | 0.655   | 0.576  | 0.013  | 0.0714  | 0.0011  | 0.13509  | 461.5  | 8.4 | 444.6  | 6.5 | 551    | 30  | 444.6  | 6.5 | 3.661972 |
| 11UCCF04_112.FIN2 | 95.8  | 1.076   | 2.175  | 0.027  | 0.1953  | 0.0022  | 0.73371  | 1172.5 | 8.7 | 1150   | 12  | 1222   | 13  | 1150   | 12  | 1.918977 |
| 11UCCF04_113.FIN2 | 129   | 3.66    | 1.675  | 0.027  | 0.166   | 0.0029  | 0.77431  | 1000   | 10  | 990    | 16  | 1023   | 11  | 990    | 16  | 1        |
| 11UCCF04_114.FIN2 | 416   | 1.6     | 0.0962 | 0.0029 | 0.01371 | 0.00018 | 0.23356  | 93.2   | 2.7 | 87.8   | 1.1 | 257    | 45  | 87.8   | 1.1 | 5.793991 |
| 11UCCF04_115.FIN2 | 482   | 0.6641  | 0.249  | 0.015  | 0.0305  | 0.0021  | 0.95405  | 225    | 12  | 194    | 13  | 573    | 39  | 194    | 13  | 13.77778 |
| 11UCCF04_116.FIN2 | 94.5  | 0.845   | 3.824  | 0.048  | 0.2667  | 0.003   | 0.64306  | 1597   | 10  | 1524   | 15  | 1700.2 | 8.5 | 1700.2 | 8.5 | 10.36349 |
| 11UCCF04_118.FIN2 | 431   | 1.565   | 0.102  | 0.0038 | 0.01385 | 0.00017 | 0.18513  | 98.5   | 3.5 | 88.7   | 1.1 | 402    | 69  | 88.7   | 1.1 | 9.949239 |
| 11UCCF04_119.FIN2 | 74.4  | 1.16    | 4.118  | 0.051  | 0.2855  | 0.0027  | 0.53897  | 1659   | 11  | 1619   | 14  | 1723   | 12  | 1723   | 12  | 6.035984 |
| 11UCCF04_120.FIN2 | 34.2  | 0.5874  | 1.789  | 0.038  | 0.1702  | 0.0033  | 0.31576  | 1041   | 14  | 1017   | 18  | 1117   | 23  | 1017   | 18  | 2.305476 |
| 11UCCF04_121.FIN2 | 77.2  | 1.134   | 2.933  | 0.028  | 0.237   | 0.002   | 0.44281  | 1392   | 7.2 | 1371   | 10  | 1422   | 11  | 1422   | 11  | 3.586498 |
| 11UCCF04_122.FIN2 | 38.7  | 0.6332  | 3.822  | 0.045  | 0.2713  | 0.0033  | 0.40346  | 1598.2 | 9.3 | 1547   | 17  | 1669   | 13  | 1669   | 13  | 7.309766 |
| 11UCCF04_123.FIN2 | 479   | 1.342   | 0.0926 | 0.0019 | 0.01411 | 0.00019 | 0.23133  | 89.9   | 1.7 | 90.3   | 1.2 | 137    | 20  | 90.3   | 1.2 | 0.444939 |

|                  |       |        |        |        |         |         |         |        |     |       |     |        |     |        |      |          |
|------------------|-------|--------|--------|--------|---------|---------|---------|--------|-----|-------|-----|--------|-----|--------|------|----------|
| 11UCCF05_3.FIN2  | 20.34 | 1.439  | 2.26   | 0.046  | 0.2079  | 0.0033  | 0.2498  | 1202   | 14  | 1217  | 18  | 1186   | 27  | 1186   | 18   | 1.24792  |
| 11UCCF05_4.FIN2  | 179   | 2.11   | 2.42   | 0.04   | 0.1949  | 0.0033  | 0.85446 | 1251   | 12  | 1150  | 18  | 1428   | 10  | 1150   | 18   | 8.073541 |
| 11UCCF05_7.FIN2  | 231   | 1.538  | 0.533  | 0.017  | 0.0641  | 0.0022  | 0.86079 | 433    | 12  | 400   | 13  | 643    | 22  | 400    | 13   | 7.621247 |
| 11UCCF05_8.FIN2  | 528   | 1.856  | 0.0934 | 0.0032 | 0.01398 | 0.00036 | 0.66482 | 90.6   | 2.9 | 89.5  | 2.3 | 174    | 35  | 89.5   | 2.3  | 1.214128 |
| 11UCCF05_9.FIN2  | 367   | 1.103  | 0.4598 | 0.0097 | 0.0569  | 0.0016  | 0.80587 | 383.7  | 6.8 | 356.8 | 9.6 | 563    | 31  | 356.8  | 9.6  | 7.010685 |
| 11UCCF05_11.FIN2 | 148   | 2.21   | 4.983  | 0.061  | 0.3343  | 0.0038  | 0.68709 | 1816   | 10  | 1859  | 18  | 1776.8 | 8.9 | 1776.8 | 8.9  | 4.626294 |
| 11UCCF05_12.FIN2 | 392   | 1.826  | 0.1001 | 0.0031 | 0.01414 | 0.0002  | 0.16571 | 96.8   | 2.9 | 90.5  | 1.3 | 317    | 54  | 90.5   | 1.3  | 6.508264 |
| 11UCCF05_13.FIN2 | 64.2  | 0.4352 | 6.84   | 0.11   | 0.3823  | 0.0041  | 0.484   | 2090   | 15  | 2087  | 19  | 2090   | 12  | 2090   | 12   | 0.143541 |
| 11UCCF05_14.FIN2 | 76.6  | 0.604  | 1.69   | 0.43   | 0.1239  | 0.0042  | 0.97527 | 877    | 85  | 752   | 24  | 1130   | 180 | 752    | 24   | 14.25314 |
| 11UCCF05_15.FIN2 | 263.9 | 2.616  | 4.762  | 0.053  | 0.3124  | 0.0042  | 0.79538 | 1777.4 | 9.5 | 1752  | 21  | 1800.4 | 8.2 | 1800.4 | 8.2  | 2.688291 |
| 11UCCF05_16.FIN2 | 117.7 | 2.1    | 1.682  | 0.03   | 0.1579  | 0.0033  | 0.72762 | 1001   | 11  | 945   | 18  | 1128   | 18  | 945    | 18   | 5.594406 |
| 11UCCF05_17.FIN2 | 338   | 1.809  | 0.816  | 0.018  | 0.0886  | 0.0012  | 0.70995 | 606.5  | 9.9 | 547.2 | 7.3 | 810    | 22  | 547.2  | 7.3  | 9.777411 |
| 11UCCF05_18.FIN2 | 302   | 1.178  | 0.0985 | 0.0025 | 0.01467 | 0.00023 | 0.01779 | 95.4   | 2.4 | 93.8  | 1.4 | 227    | 35  | 93.8   | 1.4  | 1.677149 |
| 11UCCF05_20.FIN2 | 199   | 1.636  | 3.296  | 0.031  | 0.2566  | 0.0023  | 0.68332 | 1479.6 | 7.3 | 1472  | 12  | 1489.5 | 9.7 | 1489.5 | 9.7  | 1.174891 |
| 11UCCF05_21.FIN2 | 82.6  | 0.957  | 2.24   | 0.063  | 0.1981  | 0.0046  | 0.85064 | 1198   | 18  | 1165  | 25  | 1257   | 21  | 1165   | 25   | 2.754591 |
| 11UCCF05_22.FIN2 | 352.9 | 1.828  | 3.278  | 0.046  | 0.2574  | 0.0041  | 0.82122 | 1475   | 11  | 1476  | 21  | 1485   | 10  | 1485   | 10   | 0.606061 |
| 11UCCF05_23.FIN2 | 99.4  | 0.947  | 4.097  | 0.051  | 0.2909  | 0.0034  | 0.57289 | 1653   | 10  | 1645  | 17  | 1655   | 13  | 1655   | 13   | 0.60423  |
| 11UCCF05_24.FIN2 | 432   | 7.15   | 1.547  | 0.017  | 0.1564  | 0.0019  | 0.59361 | 949.1  | 6.6 | 937   | 10  | 978    | 12  | 937    | 10   | 1.274892 |
| 11UCCF05_25.FIN2 | 199.1 | 0.798  | 0.1067 | 0.0035 | 0.01501 | 0.00029 | 0.32869 | 102.8  | 3.2 | 96    | 1.8 | 311    | 39  | 96     | 1.8  | 6.614786 |
| 11UCCF05_26.FIN2 | 398   | 71.3   | 0.4947 | 0.0068 | 0.06397 | 0.00072 | 0.51965 | 408.6  | 4.5 | 399.7 | 4.3 | 476    | 14  | 399.7  | 4.3  | 2.178169 |
| 11UCCF05_27.FIN2 | 493   | 5.28   | 3.938  | 0.06   | 0.2482  | 0.0052  | 0.82796 | 1623   | 13  | 1429  | 27  | 1875   | 11  | 1875   | 11   | 23.78667 |
| 11UCCF05_28.FIN2 | 125.1 | 0.816  | 4.018  | 0.049  | 0.2833  | 0.0036  | 0.48804 | 1637   | 10  | 1607  | 18  | 1663   | 12  | 1663   | 12   | 3.367408 |
| 11UCCF05_29.FIN2 | 39    | 0.376  | 3.76   | 0.11   | 0.0633  | 0.0016  | 0.64798 | 1583   | 24  | 395.4 | 9.4 | 4054   | 24  | DISC   | DISC | 75.02211 |
| 11UCCF05_30.FIN2 | 291.6 | 1.467  | 0.391  | 0.0054 | 0.05276 | 0.00059 | 0.43776 | 334.9  | 3.9 | 331.4 | 3.6 | 367    | 19  | 331.4  | 3.6  | 1.045088 |
| 11UCCF05_31.FIN2 | 271   | 0.969  | 0.1074 | 0.0043 | 0.01442 | 0.00025 | 0.1809  | 103.4  | 3.9 | 92.3  | 1.6 | 408    | 53  | 92.3   | 1.6  | 10.73501 |
| 11UCCF05_32.FIN2 | 125   | 0.57   | 1.563  | 0.025  | 0.1601  | 0.0021  | 0.36959 | 956.6  | 9.7 | 957   | 12  | 956    | 20  | 957    | 12   | 0.041815 |
| 11UCCF05_34.FIN2 | 137   | 1.379  | 1.069  | 0.027  | 0.116   | 0.0026  | 0.76499 | 738    | 13  | 707   | 15  | 847    | 18  | 707    | 15   | 4.200542 |
| 11UCCF05_35.FIN2 | 239   | 0.931  | 0.802  | 0.06   | 0.0669  | 0.0015  | 0.49996 | 588    | 32  | 417.2 | 9   | 1350   | 120 | 417.2  | 9    | 29.04762 |
| 11UCCF05_37.FIN2 | 347   | 8.36   | 0.4615 | 0.006  | 0.05945 | 0.00091 | 0.40649 | 385.7  | 4   | 372.2 | 5.5 | 489    | 26  | 372.2  | 5.5  | 3.50013  |
| 11UCCF05_38.FIN2 | 58    | 0.86   | 3.842  | 0.047  | 0.2803  | 0.0037  | 0.57797 | 1602.1 | 9.6 | 1593  | 18  | 1634   | 14  | 1634   | 14   | 2.50918  |
| 11UCCF05_39.FIN2 | 77    | 0.852  | 6.051  | 0.073  | 0.3495  | 0.0063  | 0.64098 | 1983   | 11  | 1931  | 30  | 2038   | 12  | 2038   | 12   | 5.250245 |
| 11UCCF05_40.FIN2 | 176   | 1.094  | 1.907  | 0.072  | 0.1663  | 0.002   | 0.61364 | 1078   | 24  | 991   | 11  | 1276   | 52  | 991    | 11   | 8.070501 |
| 11UCCF05_41.FIN2 | 244.5 | 1.052  | 0.1059 | 0.0098 | 0.01443 | 0.00026 | 0.43347 | 101.5  | 8.4 | 92.4  | 1.7 | 273    | 80  | 92.4   | 1.7  | 8.965517 |
| 11UCCF05_42.FIN2 | 61.1  | 0.58   | 13.04  | 0.12   | 0.5155  | 0.0048  | 0.54827 | 2682   | 8.8 | 2680  | 20  | 2699   | 7.8 | 2699   | 7.8  | 0.703964 |
| 11UCCF05_43.FIN2 | 428   | 2.259  | 0.238  | 0.0055 | 0.03229 | 0.00076 | 0.74509 | 216.6  | 4.5 | 204.8 | 4.7 | 406    | 32  | 204.8  | 4.7  | 5.44783  |
| 11UCCF05_44.FIN2 | 195.7 | 0.935  | 0.0977 | 0.0033 | 0.01431 | 0.00026 | 0.17307 | 94.6   | 3   | 91.6  | 1.7 | 244    | 39  | 91.6   | 1.7  | 3.171247 |
| 11UCCF05_45.FIN2 | 614   | 1.253  | 0.0936 | 0.0022 | 0.01396 | 0.00025 | 0.31151 | 91.1   | 2.1 | 89.4  | 1.6 | 204    | 32  | 89.4   | 1.6  | 1.866081 |
| 11UCCF05_46.FIN2 | 94.08 | 0.681  | 3.805  | 0.043  | 0.282   | 0.0025  | 0.38429 | 1594.9 | 9.4 | 1601  | 13  | 1602   | 12  | 1602   | 12   | 0.062422 |
| 11UCCF05_47.FIN2 | 292   | 1.782  | 0.1058 | 0.0032 | 0.0155  | 0.00023 | 0.29887 | 102    | 2.9 | 99.2  | 1.5 | 245    | 35  | 99.2   | 1.5  | 2.745098 |
| 11UCCF05_49.FIN2 | 271   | 0.945  | 2.806  | 0.028  | 0.2335  | 0.0024  | 0.76653 | 1356.7 | 7.5 | 1353  | 13  | 1374.4 | 8.4 | 1374.4 | 8.4  | 1.557043 |
| 11UCCF05_50.FIN2 | 3.64  | -63000 | 5.03   | 0.22   | 0.352   | 0.011   | 0.4931  | 1827   | 38  | 1940  | 51  | 1758   | 48  | 1758   | 48   | 10.35267 |
| 11UCCF05_51.FIN2 | 728   | 1.232  | 0.168  | 0.0033 | 0.02352 | 0.00035 | 0.86135 | 157.6  | 2.9 | 149.9 | 2.2 | 277    | 22  | 149.9  | 2.2  | 4.885787 |
| 11UCCF05_52.FIN2 | 386   | 1.595  | 0.213  | 0.032  | 0.022   | 0.0022  | 0.98819 | 189    | 26  | 140   | 14  | 660    | 120 | 140    | 14   | 25.92593 |
| 11UCCF05_53.FIN2 | 256.4 | 1.601  | 0.1007 | 0.0031 | 0.01566 | 0.00024 | 0.16509 | 97.7   | 2.9 | 100.1 | 1.5 | 178    | 35  | 100.1  | 1.5  | 2.456499 |
| 11UCCF05_54.FIN2 | 521   | 1.444  | 0.0944 | 0.0026 | 0.01398 | 0.00033 | 0.90169 | 91.6   | 2.4 | 89.5  | 2.1 | 209    | 30  | 89.5   | 2.1  | 2.292576 |
| 11UCCF05_55.FIN2 | 256   | 3.952  | 5.96   | 0.12   | 0.3663  | 0.0052  | 0.90219 | 1968   | 17  | 2011  | 25  | 1930.4 | 9.7 | 1930.4 | 9.7  | 4.1753   |
| 11UCCF05_56.FIN2 | 262   | 1.241  | 0.1376 | 0.005  | 0.01854 | 0.00042 | 0.54013 | 130.7  | 4.5 | 118.4 | 2.7 | 397    | 42  | 118.4  | 2.7  | 9.410865 |
| 11UCCF05_57.FIN2 | 310   | 2.115  | 4.438  | 0.045  | 0.3006  | 0.0035  | 0.71206 | 1718.7 | 8.5 | 1694  | 18  | 1763.6 | 9.1 | 1763.6 | 9.1  | 3.946    |

|                   |       |        |        |        |         |         |          |        |     |        |     |        |         |        |     |          |
|-------------------|-------|--------|--------|--------|---------|---------|----------|--------|-----|--------|-----|--------|---------|--------|-----|----------|
| 11UCCF05_79.FIN2  | 130.5 | 1.065  | 2.947  | 0.032  | 0.2462  | 0.0025  | 0.47562  | 1393.6 | 8.3 | 1419   | 13  | 1370   | 12      | 1370   | 12  | 3.576642 |
| 11UCCF05_80.FIN2  | 920   | 2.393  | 0.1049 | 0.0018 | 0.01558 | 0.00019 | 0.47253  | 101.3  | 1.6 | 99.7   | 1.2 | 166    | 21      | 99.7   | 1.2 | 1.579467 |
| 11UCCF05_82.FIN2  | 102   | 0.75   | 1.779  | 0.026  | 0.1747  | 0.0025  | 0.48355  | 1037.1 | 9.5 | 1038   | 14  | 1042   | 16      | 1038   | 14  | 0.08678  |
| 11UCCF05_84.FIN2  | 225.5 | 1.225  | 0.0957 | 0.0032 | 0.01455 | 0.00033 | 0.28483  | 92.7   | 2.9 | 93.1   | 2.1 | 242    | 47      | 93.1   | 2.1 | 0.431499 |
| 11UCCF05_85.FIN2  | 53.5  | 0.436  | 14.43  | 0.18   | 0.5411  | 0.0068  | 0.70076  | 2779   | 12  | 2787   | 28  | 2774   | 10      | 2774   | 10  | 0.468637 |
| 11UCCF05_86.FIN2  | 59.6  | 0.664  | 4.299  | 0.071  | 0.3094  | 0.005   | 0.57386  | 1692   | 14  | 1737   | 24  | 1650   | 17      | 1650   | 17  | 5.272727 |
| 11UCCF05_87.FIN2  | 312   | 0.655  | 0.1023 | 0.0048 | 0.01485 | 0.00036 | 0.64233  | 98.7   | 4.4 | 95     | 2.3 | 304    | 57      | 95     | 2.3 | 3.748734 |
| 11UCCF05_88.FIN2  | 187.5 | 17.6   | 2.079  | 0.079  | 0.192   | 0.0049  | 0.83954  | 1148   | 27  | 1131   | 26  | 1197   | 37      | 1131   | 26  | 1.480836 |
| 11UCCF05_89.FIN2  | 317   | 1.075  | 0.1005 | 0.0025 | 0.01474 | 0.0002  | 0.33986  | 97.4   | 2.4 | 94.3   | 1.3 | 225    | 31      | 94.3   | 1.3 | 3.182752 |
| 11UCCF05_90.FIN2  | 39.9  | 1.028  | 5.291  | 0.077  | 0.34    | 0.0042  | 0.67718  | 1866   | 12  | 1886   | 20  | 1851   | 13      | 1851   | 13  | 1.89087  |
| 11UCCF05_92.FIN2  | 327   | 2.95   | 2.235  | 0.047  | 0.1986  | 0.0035  | 0.90238  | 1191   | 15  | 1167   | 19  | 1246   | 18      | 1167   | 19  | 2.015113 |
| 11UCCF05_93.FIN2  | 218   | 1.096  | 0.1052 | 0.0032 | 0.01518 | 0.00027 | 0.33396  | 101.5  | 2.9 | 97.1   | 1.7 | 239    | 36      | 97.1   | 1.7 | 4.334975 |
| 11UCCF05_94.FIN2  | 205   | 1.968  | 0.105  | 0.0034 | 0.0145  | 0.00028 | 0.30724  | 101.3  | 3.2 | 92.8   | 1.8 | 347    | 38      | 92.8   | 1.8 | 8.390918 |
| 11UCCF05_95.FIN2  | 107   | 0.979  | 0.1018 | 0.0055 | 0.01467 | 0.00034 | 0.034744 | 98.2   | 5   | 93.9   | 2.2 | 392    | 79      | 93.9   | 2.2 | 4.378819 |
| 11UCCF05_96.FIN2  | 115.7 | 0.915  | 2.604  | 0.031  | 0.2245  | 0.0021  | 0.40829  | 1302.8 | 9.1 | 1306   | 11  | 1304   | 14      | 1304   | 14  | 0.153374 |
| 11UCCF05_97.FIN2  | 363   | 1.168  | 3.903  | 0.072  | 0.2772  | 0.0055  | 0.77812  | 1613   | 15  | 1581   | 27  | 1651   | 18      | 1651   | 18  | 4.239855 |
| 11UCCF05_98.FIN2  | 107   | 1.42   | 0.527  | 0.011  | 0.0684  | 0.0011  | 0.10263  | 430.3  | 7.8 | 426.5  | 6.8 | 462    | 29      | 426.5  | 6.8 | 0.883105 |
| 11UCCF05_99.FIN2  | 720   | 1.452  | 0.1029 | 0.002  | 0.01466 | 0.00022 | 0.79332  | 99.4   | 1.9 | 93.8   | 1.4 | 232    | 25      | 93.8   | 1.4 | 5.633803 |
| 11UCCF05_100.FIN2 | 385   | 0.991  | 3.596  | 0.066  | 0.2482  | 0.0055  | 0.94586  | 1547   | 14  | 1428   | 28  | 1708   | 10      | 1708   | 10  | 16.39344 |
| 11UCCF05_101.FIN2 | 14.64 | 0.89   | 1.229  | 0.084  | 0.1072  | 0.0029  | 0.34811  | 794    | 32  | 656    | 17  | 1263   | 90      | 656    | 17  | 17.38035 |
| 11UCCF05_102.FIN2 | 863   | 7.88   | 0.524  | 0.022  | 0.0551  | 0.0015  | 0.88029  | 430    | 14  | 345.7  | 9.2 | 923    | 49      | 345.7  | 9.2 | 19.60465 |
| 11UCCF05_103.FIN2 | 242   | 0.7268 | 3.801  | 0.059  | 0.271   | 0.0038  | 0.84329  | 1592   | 12  | 1546   | 19  | 1654.7 | 9.2     | 1654.7 | 9.2 | 6.569167 |
| 11UCCF05_104.FIN2 | 278.5 | 2.882  | 2.597  | 0.063  | 0.2036  | 0.0038  | 0.95036  | 1298   | 18  | 1194   | 21  | 1469   | 18      | 1194   | 21  | 8.012327 |
| 11UCCF05_105.FIN2 | 219   | 0.904  | 4.034  | 0.082  | 0.2809  | 0.0052  | 0.93504  | 1644   | 17  | 1595   | 26  | 1699.7 | 9.7     | 1699.7 | 9.7 | 6.159911 |
| 11UCCF05_106.FIN2 | 186   | 1.82   | 2.814  | 0.047  | 0.2323  | 0.0034  | 0.84923  | 1358   | 13  | 1346   | 18  | 1382   | 13      | 1382   | 13  | 2.60492  |
| 11UCCF05_107.FIN2 | 539   | 1.116  | 0.8238 | 0.0094 | 0.0969  | 0.0011  | 0.55404  | 610.5  | 5.2 | 595.9  | 6.5 | 662    | 14      | 595.9  | 6.5 | 2.391482 |
| 11UCCF05_108.FIN2 | 313   | 1.593  | 2.074  | 0.092  | 0.1332  | 0.0048  | 0.85256  | 1152   | 29  | 805    | 28  | 1851   | 34 DISC | DISC   |     | 30.12153 |
| 11UCCF05_109.FIN2 | 324   | 2.93   | 2.706  | 0.036  | 0.2017  | 0.0024  | 0.75625  | 1329.5 | 9.8 | 1184   | 13  | 1576   | 11      | 1184   | 13  | 10.94396 |
| 11UCCF05_110.FIN2 | 19.69 | 2.421  | 12.2   | 0.21   | 0.495   | 0.0078  | 0.72504  | 2622   | 17  | 2590   | 34  | 2660   | 12      | 2660   | 12  | 2.631579 |
| 11UCCF05_113.FIN2 | 792   | 2.34   | 0.0928 | 0.0018 | 0.01391 | 0.00019 | 0.42598  | 90     | 1.7 | 89.1   | 1.2 | 151    | 24      | 89.1   | 1.2 | 1        |
| 11UCCF05_114.FIN2 | 106.8 | 2.61   | 15.22  | 0.23   | 0.5455  | 0.0059  | 0.43273  | 2831   | 15  | 2806   | 24  | 2832   | 22      | 2832   | 22  | 0.918079 |
| 11UCCF05_115.FIN2 | 165.4 | 0.712  | 12.367 | 0.075  | 0.4897  | 0.0037  | 0.62181  | 2633.3 | 5.5 | 2569   | 16  | 2679.6 | 4.2     | 2679.6 | 4.2 | 4.127482 |
| 11UCCF05_116.FIN2 | 102   | 1.59   | 1.657  | 0.052  | 0.1627  | 0.0046  | 0.82747  | 999    | 21  | 975    | 25  | 1057   | 23      | 975    | 25  | 2.402402 |
| 11UCCF05_117.FIN2 | 202.8 | 1.017  | 0.0995 | 0.0031 | 0.01467 | 0.00024 | 0.2651   | 96.2   | 2.8 | 93.9   | 1.5 | 218    | 35      | 93.9   | 1.5 | 2.390852 |
| 11UCCF05_118.FIN2 | 135.2 | 1.317  | 2.077  | 0.021  | 0.192   | 0.0018  | 0.36624  | 1140.7 | 7   | 1132.2 | 9.7 | 1150   | 12      | 1132.2 | 9.7 | 0.745156 |
| 11UCCF05_119.FIN2 | 218.2 | 1.78   | 0.734  | 0.012  | 0.0922  | 0.0012  | 0.45984  | 558.6  | 6.8 | 568.6  | 7.1 | 541    | 16      | 568.6  | 7.1 | 1.79019  |
| 11UCCF05_120.FIN2 | 502.5 | 3.012  | 3.337  | 0.043  | 0.2421  | 0.0035  | 0.87241  | 1489   | 10  | 1397   | 18  | 1627   | 9.8     | 1627   | 9.8 | 14.13645 |

## Sunnyside Canyon

Sample Name:

| Grain #         | [U] ppm | U/Th  | 207/235 |          | 206/238 |          | RHO      | 207/235 |          | 206/238  |          | 206/207  |          | Best age |          | % Discordance* |
|-----------------|---------|-------|---------|----------|---------|----------|----------|---------|----------|----------|----------|----------|----------|----------|----------|----------------|
|                 |         |       | 207/235 | 2σ error | 206/238 | 2σ error |          | Age Ma  | 2σ error | Age (Ma) | 2σ error | Age (Ma) | 2σ error | (Ma)     | 2σ error |                |
| 11USS01_1.FIN2  | 208     | 6.7   | 0.5221  | 0.0076   | 0.06861 | 0.00084  | 0.22721  | 426.3   | 5.1      | 428.4    | 5.2      | 438      | 20       | 428.4    | 5.2      | 0.492611       |
| 11USS01_2.FIN2  | 66.7    | 0.503 | 1.841   | 0.046    | 0.1468  | 0.0032   | 0.69736  | 1059    | 16       | 883      | 18       | 1461     | 30       | 883      | 18       | 16.61945       |
| 11USS01_3.FIN2  | 440     | 2.5   | 0.575   | 0.035    | 0.0725  | 0.0022   | 0.95608  | 452     | 16       | 451      | 13       | 475      | 48       | 451      | 13       | 0.221239       |
| 11USS01_4.FIN2  | 950     | 0.503 | 0.462   | 0.016    | 0.0611  | 0.002    | 0.98242  | 385     | 12       | 382      | 12       | 431      | 25       | 382      | 12       | 0.779221       |
| 11USS01_5.FIN2  | 177.6   | 0.77  | 1.693   | 0.02     | 0.1603  | 0.0017   | 0.54677  | 1005.5  | 7.4      | 958.2    | 9.4      | 1115     | 13       | 958.2    | 9.4      | 4.704127       |
| 11USS01_6.FIN2  | 35.1    | 0.98  | 0.716   | 0.017    | 0.0882  | 0.0015   | 0.17512  | 547     | 10       | 546.1    | 8.7      | 541      | 29       | 546.1    | 8.7      | 0.164534       |
| 11USS01_7.FIN2  | 80.9    | 1.552 | 1.824   | 0.024    | 0.1785  | 0.0018   | 0.42526  | 1053.6  | 8.6      | 1058.4   | 9.7      | 1057     | 15       | 1058.4   | 9.7      | 0.455581       |
| 11USS01_8.FIN2  | 112.2   | 0.725 | 5.39    | 0.064    | 0.3448  | 0.005    | 0.67182  | 1882    | 10       | 1909     | 24       | 1853     | 12       | 1853     | 12       | 3.022126       |
| 11USS01_9.FIN2  | 214     | 2.14  | 5.228   | 0.07     | 0.3314  | 0.0052   | 0.85861  | 1856    | 12       | 1848     | 26       | 1854     | 13       | 1854     | 13       | 0.323625       |
| 11USS01_10.FIN2 | 82.1    | 1.286 | 4.233   | 0.069    | 0.3005  | 0.0049   | 0.83222  | 1680    | 13       | 1694     | 24       | 1634     | 17       | 1634     | 17       | 3.671971       |
| 11USS01_11.FIN2 | 141.8   | 2.9   | 4.787   | 0.036    | 0.3157  | 0.0031   | 0.51981  | 1782.2  | 6.4      | 1768     | 15       | 1807.2   | 9.6      | 1807.2   | 9.6      | 2.169101       |
| 11USS01_12.FIN2 | 30.8    | 0.309 | 5.155   | 0.073    | 0.3357  | 0.0049   | 0.61126  | 1847    | 13       | 1865     | 24       | 1835     | 14       | 1835     | 14       | 1.634877       |
| 11USS01_13.FIN2 | 50.4    | 1.168 | 0.77    | 0.018    | 0.0919  | 0.0015   | 0.15608  | 580     | 10       | 566.5    | 9.1      | 618      | 37       | 566.5    | 9.1      | 2.327586       |
| 11USS01_14.FIN2 | 25.3    | 1.451 | 1.725   | 0.045    | 0.1627  | 0.0034   | 0.37232  | 1015    | 17       | 974      | 19       | 1144     | 34       | 974      | 19       | 4.039409       |
| 11USS01_15.FIN2 | 83.1    | 1.792 | 5.583   | 0.058    | 0.348   | 0.0034   | 0.63012  | 1915.1  | 9        | 1925     | 16       | 1909     | 10       | 1909     | 10       | 0.838135       |
| 11USS01_16.FIN2 | 774     | 15.27 | 1.612   | 0.018    | 0.1592  | 0.0018   | 0.96194  | 974.4   | 6.8      | 952      | 10       | 1024.7   | 6.2      | 952      | 10       | 2.298851       |
| 11USS01_17.FIN2 | 840     | 1.63  | 0.092   | 0.0047   | 0.01365 | 0.00062  | 0.92611  | 90      | 4.2      | 87.4     | 4        | 232      | 43       | 87.4     | 4        | 2.888889       |
| 11USS01_18.FIN2 | 321     | 1.037 | 4.547   | 0.039    | 0.3111  | 0.0026   | 0.73624  | 1739.2  | 7.2      | 1746     | 13       | 1731.5   | 6.7      | 1731.5   | 6.7      | 0.837424       |
| 11USS01_19.FIN2 | 360     | 3.65  | 1.737   | 0.019    | 0.1688  | 0.0019   | 0.81698  | 1021.8  | 7.3      | 1005     | 11       | 1066.3   | 9.9      | 1005     | 11       | 1.644157       |
| 11USS01_20.FIN2 | 146     | 1.54  | 2       | 0.037    | 0.1843  | 0.0033   | 0.79303  | 1117    | 13       | 1090     | 18       | 1159     | 18       | 1090     | 18       | 2.417189       |
| 11USS01_21.FIN2 | 81      | 1.506 | 4.006   | 0.047    | 0.283   | 0.0032   | 0.62729  | 1634.7  | 9.5      | 1606     | 16       | 1655.5   | 9.5      | 1655.5   | 9.5      | 2.990033       |
| 11USS01_22.FIN2 | 575     | 1.308 | 0.097   | 0.002    | 0.01435 | 0.00017  | 0.22093  | 94      | 1.8      | 91.8     | 1.1      | 173      | 26       | 91.8     | 1.1      | 2.340426       |
| 11USS01_23.FIN2 | 194     | 0.972 | 0.533   | 0.01     | 0.06819 | 0.00066  | 0.1754   | 433.2   | 6.7      | 425.2    | 4        | 484      | 31       | 425.2    | 4        | 1.846722       |
| 11USS01_24.FIN2 | 209.6   | 2.146 | 4.4     | 0.034    | 0.3017  | 0.0025   | 0.72836  | 1712.8  | 6.6      | 1700     | 12       | 1729.4   | 6.9      | 1729.4   | 6.9      | 1.700012       |
| 11USS01_25.FIN2 | 438     | 1.595 | 0.5464  | 0.0062   | 0.06959 | 0.00064  | 0.57911  | 442.5   | 4.1      | 433.6    | 3.8      | 501      | 13       | 433.6    | 3.8      | 2.011299       |
| 11USS01_26.FIN2 | 37.3    | 1.09  | 1.974   | 0.037    | 0.1869  | 0.0025   | 0.22434  | 1105    | 13       | 1104     | 13       | 1102     | 24       | 1104     | 13       | 0.090498       |
| 11USS01_27.FIN2 | 213     | 1.1   | 3.61    | 0.11     | 0.2583  | 0.0067   | 0.83985  | 1553    | 24       | 1480     | 34       | 1652     | 20       | 1652     | 20       | 10.41162       |
| 11USS01_28.FIN2 | 145     | 1.136 | 3.953   | 0.044    | 0.2835  | 0.0034   | 0.76768  | 1623.7  | 9.1      | 1608     | 17       | 1627.3   | 9.9      | 1627.3   | 9.9      | 1.186014       |
| 11USS01_29.FIN2 | 327     | 1.124 | 0.0954  | 0.0027   | 0.01427 | 0.00023  | 0.33977  | 92.5    | 2.5      | 91.3     | 1.4      | 201      | 35       | 91.3     | 1.4      | 1.297297       |
| 11USS01_30.FIN2 | 76      | 1.88  | 1.858   | 0.029    | 0.1804  | 0.0025   | 0.53777  | 1065    | 10       | 1069     | 13       | 1058     | 15       | 1069     | 13       | 0.375587       |
| 11USS01_31.FIN2 | 130.9   | 0.849 | 1.973   | 0.023    | 0.1879  | 0.0017   | 0.63286  | 1105.7  | 7.8      | 1109.8   | 9.5      | 1116     | 10       | 1109.8   | 9.5      | 0.370806       |
| 11USS01_32.FIN2 | 153.2   | 1.469 | 1.776   | 0.019    | 0.1747  | 0.0014   | 0.50495  | 1036.3  | 6.8      | 1038.1   | 7.8      | 1031     | 12       | 1038.1   | 7.8      | 0.173695       |
| 11USS01_33.FIN2 | 103.6   | 1.364 | 0.516   | 0.011    | 0.0661  | 0.001    | 0.1405   | 423.2   | 7.1      | 412.4    | 6        | 484      | 27       | 412.4    | 6        | 2.551985       |
| 11USS01_34.FIN2 | 218     | 1.679 | 2.352   | 0.023    | 0.2114  | 0.0021   | 0.79331  | 1227.6  | 7        | 1236     | 11       | 1219.6   | 7.5      | 1219.6   | 7.5      | 1.344703       |
| 11USS01_35.FIN2 | 166.6   | 2.238 | 0.0986  | 0.0037   | 0.01511 | 0.00022  | 0.19165  | 95.3    | 3.4      | 96.6     | 1.4      | 223      | 45       | 96.6     | 1.4      | 1.364113       |
| 11USS01_36.FIN2 | 91.8    | 0.87  | 4.834   | 0.032    | 0.3181  | 0.002    | 0.37546  | 1791.3  | 5.6      | 1780     | 10       | 1812.5   | 8.8      | 1812.5   | 8.8      | 1.793103       |
| 11USS01_37.FIN2 | 608     | 1.48  | 0.282   | 0.096    | 0.024   | 0.0012   | 0.96979  | 194     | 25       | 153      | 7.3      | 580      | 170      | 153      | 7.3      | 21.13402       |
| 11USS01_38.FIN2 | 99      | 1.034 | 12.81   | 0.1      | 0.5047  | 0.0053   | 0.58646  | 2665.5  | 7.7      | 2633     | 23       | 2700.2   | 7.4      | 2700.2   | 7.4      | 2.488705       |
| 11USS01_39.FIN2 | 68.9    | 1.625 | 1.694   | 0.024    | 0.1647  | 0.0018   | 0.39911  | 1005.4  | 9        | 982.5    | 9.9      | 1056     | 16       | 982.5    | 9.9      | 2.2777         |
| 11USS01_40.FIN2 | 70.4    | 1.684 | 5       | 0.061    | 0.331   | 0.0037   | 0.37253  | 1818    | 10       | 1843     | 18       | 1801     | 14       | 1801     | 14       | 2.332038       |
| 11USS01_41.FIN2 | 26.3    | 0.838 | 1.763   | 0.038    | 0.1699  | 0.0035   | 0.21729  | 1030    | 14       | 1011     | 20       | 1068     | 28       | 1011     | 20       | 1.84466        |
| 11USS01_42.FIN2 | 146.6   | 0.811 | 4.255   | 0.036    | 0.2916  | 0.0025   | 0.62245  | 1684.3  | 7        | 1649     | 13       | 1733.4   | 8.7      | 1733.4   | 8.7      | 4.869043       |
| 11USS01_43.FIN2 | 162.1   | 1.399 | 1.792   | 0.02     | 0.1763  | 0.0013   | 0.34395  | 1042.2  | 7.4      | 1046.7   | 7        | 1041     | 13       | 1046.7   | 7        | 0.431779       |
| 11USS01_44.FIN2 | 58      | 1.367 | 2.037   | 0.027    | 0.1918  | 0.002    | 0.23647  | 1128.1  | 9.2      | 1131     | 11       | 1119     | 16       | 1131     | 11       | 0.257069       |
| 11USS01_45.FIN2 | 341     | 0.936 | 1.87    | 0.051    | 0.1741  | 0.0039   | 0.95895  | 1073    | 18       | 1034     | 21       | 1152     | 15       | 1034     | 21       | 3.634669       |
| 11USS01_46.FIN2 | 49.9    | 0.87  | 0.571   | 0.015    | 0.0693  | 0.0011   | 0.083673 | 458     | 9.5      | 431.7    | 6.8      | 596      | 41       | 431.7    | 6.8      | 5.742358       |
| 11USS01_47.FIN2 | 712     | 0.838 | 0.0896  | 0.0029   | 0.01324 | 0.00032  | 0.64137  | 87      | 2.7      | 84.8     | 2        | 202      | 30       | 84.8     | 2        | 2.528736       |
| 11USS01_48.FIN2 | 704     | 0.827 | 0.2666  | 0.0072   | 0.0373  | 0.0009   | 0.95753  | 239.7   | 5.8      | 236      | 5.6      | 282      | 15       | 236      | 5.6      | 1.543596       |
| 11USS01_49.FIN2 | 276     | 3.81  | 0.51    | 0.018    | 0.0626  | 0.0021   | 0.90316  | 418     | 12       | 391      | 13       | 574      | 19       | 391      | 13       | 6.45933        |
| 11USS01_50.FIN2 | 71.5    | 0.629 | 3.266   | 0.043    | 0.2536  | 0.0027   | 0.45211  | 1472    | 10       | 1457     | 14       | 1513     | 16       | 1513     | 16       | 3.701256       |
| 11USS01_51.FIN2 | 142     | 1.258 | 3.085   | 0.026    | 0.2468  | 0.0019   | 0.37721  | 1428.6  | 6.5      | 1421.9   | 9.8      | 1445     | 12       | 1445     | 12       | 1.598616       |
| 11USS01_52.FIN2 | 253     | 1.91  | 3.878   | 0.043    | 0.2815  | 0.0029   | 0.76989  | 1609.5  | 8.8      | 1599     | 14       | 1633.5   | 7.9      | 1633.5   | 7.9      | 2.112029       |
| 11USS01_53.FIN2 | 521     | 2     | 0.3719  | 0.0068   | 0.0493  | 0.0012   | 0.86609  | 320.8   | 5        | 310.1    | 7.3      | 437      | 25       | 310.1    | 7.3      | 3.335411       |
| 11USS01_54.FIN2 | 84.6    | 1.654 | 0.81    | 0.19     | 0.059   | 0.0017   | 0.95427  | 507     | 69       | 369      | 10       | 1040     | 240      | 369      | 10       | 27.21893       |
| 11USS01_55.FIN2 | 145.2   | 1.092 | 5.094   | 0.04     | 0.3288  | 0.0028   | 0.48642  | 1835.4  | 6.7      | 1832     | 14       | 1839.2   | 8.5      | 1839.2   | 8.5      | 0.391475       |
| 11USS01_56.FIN2 | 254     | 2.65  | 0.1063  | 0.0041   | 0.01451 | 0.0003   | 0.32197  | 102.4   | 3.8      | 92.9     | 1.9      | 396      | 59       | 92.9     | 1.9      | 9.277344       |
| 11USS01_57.FIN2 | 347     | 1.476 | 1.668   | 0.015    | 0.1672  | 0.0014   | 0.60428  | 996.8   | 5.4      | 996.3    | 7.9      | 997      | 8.1      | 996.3    | 7.9      | 0.050161       |
| 11USS01_58.FIN2 | 94.3    | 1.702 | 4.373   | 0.033    | 0.2994  | 0.0028   | 0.30412  | 1706.9  | 6.3      | 1688     | 14       | 1730     | 11       | 1730     | 11       | 2.427746       |
| 11USS01_59.FIN2 | 58      | 0.967 | 5.039   | 0.054    | 0.3166  | 0.0031   | 0.62617  | 1825.1  | 9.1      | 1773     | 15       | 1875     | 11       | 1875     | 11       | 5.44           |
| 11USS01_60.FIN2 | 311.2   | 2.454 | 3.902   | 0.04     | 0.2805  | 0.0028   | 0.83339  | 1613.5  | 8.4      | 1594     | 14       | 1639.5   | 6.1      | 1639.5   | 6.1      | 2.775236       |
| 11USS01_61.FIN2 | 127.1   | 0.998 | 4.03    | 0.038    | 0.2876  | 0.0027   | 0.63731  | 1639.8  | 7.7      | 1629     | 14       | 1648.2   | 8.1      | 1648.2   | 8.1      | 1.164907       |
| 11USS01_62.FIN2 | 294     | 0.956 | 0.1042  | 0.003    | 0.01508 | 0.00024  | 0.12621  | 100.6   | 2.7      | 96.5     | 1.5      | 241      | 38       | 96.5     | 1.5      | 4.075547       |
| 11USS01_63.FIN2 | 88.2    | 2.218 | 1.62    | 0.021    | 0.1622  | 0.0014   | 0.33229  | 978.4   | 8.2      | 969.1    | 7.7      | 1010     | 13       | 969.1    | 7.7      | 0.950531       |
| 11USS01_64.FIN2 | 114.5   | 1.107 | 4.517   | 0.048    | 0.3123  | 0.0032   | 0.70721  | 1734.4  | 8.7      | 1751     | 15       | 1731.7   | 8.3      | 1731.7   | 8.3      | 1.114512       |
| 11USS01_65.FIN2 | 65.33   | 0.378 | 0.891   | 0.019    | 0.1013  | 0.0014   | 0.15876  | 646.2   | 9.9      | 622      | 7.9      | 725      | 30       | 622      | 7.9      | 3.744971       |
| 11USS01_66.FIN2 | 167.8   | 2.368 | 1.677   | 0.028    | 0.1645  | 0.0017   | 0.043581 | 999     | 10       | 981.6    | 9.6      | 1027     | 20       | 981.6    | 9.6      | 1.741742       |
| 11USS01_67.FIN2 | 96.3    | 2.89  | 2.095   | 0.045    | 0.1967  | 0.0035   | 0.78673  | 1145    | 15       | 1157     | 19       | 1136     | 15       | 1157     | 19       | 1.048035       |
| 11USS01_68.FIN2 | 122.1   | 3.66  | 2.026   | 0.084    | 0.1812  | 0.0037   | 0.72932  | 1112    | 24       | 1073     | 20       | 1190     | 44       | 1073     | 20       | 3.507194       |
| 11USS01_69.FIN2 | 39.6    | 1.13  | 3.162   | 0.059    | 0.2504  | 0.004    | 0.58378  | 1451    | 14       | 1440     | 21       | 1458     | 18       | 1458     | 18       | 1.234568       |
| 11USS01         |         |       |         |          |         |          |          |         |          |          |          |          |          |          |          |                |

|                  |       |        |        |        |         |         |          |        |     |        |     |        |     |        |     |          |
|------------------|-------|--------|--------|--------|---------|---------|----------|--------|-----|--------|-----|--------|-----|--------|-----|----------|
| 11USS01_85.FIN2  | 313   | 0.546  | 0.646  | 0.026  | 0.06477 | 0.00086 | 0.39319  | 504    | 16  | 404.5  | 5.2 | 959    | 56  | 404.5  | 5.2 | 19.74206 |
| 11USS01_86.FIN2  | 74.9  | 0.805  | 13.53  | 0.17   | 0.5237  | 0.0069  | 0.73335  | 2717   | 12  | 2714   | 29  | 2717   | 11  | 2717   | 11  | 0.110416 |
| 11USS01_87.FIN2  | 350   | 1.185  | 0.101  | 0.0029 | 0.01486 | 0.00022 | 0.29428  | 97.6   | 2.7 | 95.1   | 1.4 | 186    | 35  | 95.1   | 1.4 | 2.561475 |
| 11USS01_88.FIN2  | 94.9  | 1.011  | 3.895  | 0.073  | 0.2776  | 0.0059  | 0.82989  | 1612   | 15  | 1578   | 30  | 1661.2 | 8.8 | 1661.2 | 8.8 | 5.008428 |
| 11USS01_89.FIN2  | 270   | 3.55   | 2.818  | 0.034  | 0.2306  | 0.0023  | 0.792    | 1359.6 | 9.1 | 1337   | 12  | 1398   | 8.6 | 1398   | 8.6 | 4.363376 |
| 11USS01_90.FIN2  | 109.2 | 1.336  | 1.761  | 0.026  | 0.1718  | 0.0024  | 0.51576  | 1032.8 | 9.7 | 1022   | 13  | 1044   | 18  | 1022   | 13  | 1.045701 |
| 11USS01_91.FIN2  | 209   | 0.7649 | 12.42  | 0.14   | 0.4891  | 0.0055  | 0.86649  | 2638   | 11  | 2566   | 24  | 2695.9 | 6.4 | 2695.9 | 6.4 | 4.818428 |
| 11USS01_92.FIN2  | 243   | 2.58   | 4.484  | 0.098  | 0.3174  | 0.0065  | 0.87824  | 1729   | 18  | 1776   | 32  | 1688   | 11  | 1688   | 11  | 5.21327  |
| 11USS01_93.FIN2  | 585   | 1.354  | 0.0944 | 0.0021 | 0.01444 | 0.00028 | 0.48683  | 91.6   | 1.9 | 92.4   | 1.8 | 152    | 23  | 92.4   | 1.8 | 0.873362 |
| 11USS01_94.FIN2  | 79.6  | 1.04   | 4.088  | 0.043  | 0.2907  | 0.0023  | 0.17369  | 1651.2 | 8.6 | 1645   | 12  | 1669   | 15  | 1669   | 15  | 1.437987 |
| 11USS01_95.FIN2  | 129.6 | 0.863  | 0.1087 | 0.0047 | 0.01557 | 0.00032 | 0.086087 | 104.6  | 4.3 | 99.6   | 2   | 372    | 58  | 99.6   | 2   | 4.780115 |
| 11USS01_96.FIN2  | 234   | 1.336  | 2.801  | 0.026  | 0.2323  | 0.002   | 0.54369  | 1356   | 6.9 | 1346   | 10  | 1370.1 | 9.5 | 1370.1 | 9.5 | 1.758996 |
| 11USS01_97.FIN2  | 55.6  | 1.109  | 2.102  | 0.046  | 0.198   | 0.0037  | 0.34045  | 1148   | 15  | 1164   | 20  | 1120   | 27  | 1164   | 20  | 1.393728 |
| 11USS01_98.FIN2  | 179   | 0.817  | 0.473  | 0.01   | 0.06365 | 0.00099 | 0.39221  | 393.5  | 6.8 | 397.8  | 6   | 389    | 22  | 397.8  | 6   | 1.092757 |
| 11USS01_99.FIN2  | 162   | 1.075  | 1.893  | 0.021  | 0.1831  | 0.0019  | 0.56453  | 1078   | 7.4 | 1085   | 10  | 1071   | 12  | 1085   | 10  | 0.649351 |
| 11USS01_100.FIN2 | 302   | 2.71   | 1.674  | 0.019  | 0.1661  | 0.0012  | 0.50178  | 998.2  | 7   | 990.5  | 6.6 | 1012   | 10  | 990.5  | 6.6 | 0.771388 |
| 11USS01_101.FIN2 | 48.5  | 0.791  | 2.052  | 0.046  | 0.1909  | 0.0034  | 0.59155  | 1131   | 15  | 1126   | 18  | 1150   | 23  | 1126   | 18  | 0.442087 |
| 11USS01_102.FIN2 | 78.3  | 1.153  | 4.011  | 0.046  | 0.2875  | 0.0031  | 0.4022   | 1635.5 | 9.3 | 1630   | 16  | 1648   | 11  | 1648   | 11  | 1.092233 |
| 11USS01_103.FIN2 | 193   | 0.991  | 5.363  | 0.076  | 0.3311  | 0.0045  | 0.76504  | 1878   | 12  | 1843   | 22  | 1909.9 | 9.5 | 1909.9 | 9.5 | 3.502801 |
| 11USS01_104.FIN2 | 329   | 1.464  | 0.0949 | 0.0028 | 0.0139  | 0.00023 | 0.24982  | 92     | 2.6 | 89     | 1.4 | 222    | 35  | 89     | 1.4 | 3.26087  |
| 11USS01_105.FIN2 | 407   | 1.974  | 0.0974 | 0.0024 | 0.01442 | 0.00022 | 0.18073  | 94.4   | 2.3 | 92.3   | 1.4 | 198    | 25  | 92.3   | 1.4 | 2.224576 |
| 11USS01_106.FIN2 | 49.5  | 2.05   | 1.806  | 0.035  | 0.1731  | 0.002   | 0.092231 | 1048   | 13  | 1029   | 11  | 1088   | 25  | 1029   | 11  | 1.812977 |
| 11USS01_107.FIN2 | 204   | 2.14   | 2.86   | 0.069  | 0.2374  | 0.0046  | 0.76817  | 1370   | 18  | 1373   | 24  | 1366   | 23  | 1366   | 23  | 0.512445 |
| 11USS01_108.FIN2 | 62    | 1.054  | 0.095  | 0.013  | 0.01427 | 0.00069 | 0.001506 | 91     | 12  | 91.3   | 4.4 | 426    | 87  | 91.3   | 4.4 | 0.32967  |
| 11USS01_109.FIN2 | 108   | 2.165  | 4.872  | 0.048  | 0.3245  | 0.0032  | 0.64297  | 1796.8 | 8.4 | 1811   | 15  | 1784   | 9   | 1784   | 9   | 1.513453 |
| 11USS01_110.FIN2 | 99.9  | 0.4764 | 1.66   | 0.035  | 0.1662  | 0.0034  | 0.79633  | 995    | 14  | 991    | 19  | 1015   | 19  | 991    | 19  | 0.40201  |
| 11USS01_111.FIN2 | 68.2  | 0.473  | 1.756  | 0.03   | 0.1719  | 0.0025  | 0.82506  | 1028   | 11  | 1022   | 14  | 1038   | 16  | 1022   | 14  | 0.583658 |
| 11USS01_112.FIN2 | 186.2 | 0.82   | 3.178  | 0.053  | 0.2515  | 0.0038  | 0.89656  | 1450   | 13  | 1449   | 19  | 1455   | 14  | 1455   | 14  | 0.412371 |
| 11USS01_113.FIN2 | 304   | 1.782  | 4.463  | 0.039  | 0.3063  | 0.0025  | 0.71529  | 1723.7 | 7.3 | 1722   | 12  | 1723.5 | 7   | 1723.5 | 7   | 0.087032 |
| 11USS01_114.FIN2 | 139   | 1.94   | 3.321  | 0.043  | 0.2598  | 0.0033  | 0.89865  | 1485   | 10  | 1488   | 17  | 1488   | 8.4 | 1488   | 8.4 | 0        |
| 11USS01_115.FIN2 | 95.9  | 1.244  | 3.252  | 0.052  | 0.2587  | 0.003   | 0.6593   | 1470   | 13  | 1483   | 15  | 1456   | 14  | 1456   | 14  | 1.854396 |
| 11USS01_116.FIN2 | 112.3 | 0.8105 | 2.735  | 0.028  | 0.2315  | 0.002   | 0.42548  | 1337.4 | 7.7 | 1342   | 10  | 1335   | 9.8 | 1335   | 9.8 | 0.524345 |
| 11USS01_117.FIN2 | 150.8 | 1.254  | 3.609  | 0.043  | 0.2732  | 0.0032  | 0.67804  | 1550.6 | 9.4 | 1557   | 16  | 1550.6 | 7   | 1550.6 | 7   | 0.412743 |
| 11USS01_118.FIN2 | 62    | 1.33   | 1.787  | 0.041  | 0.1777  | 0.0036  | 0.45519  | 1040   | 15  | 1054   | 20  | 1039   | 25  | 1054   | 20  | 1.346154 |
| 11USS01_119.FIN2 | 63.6  | 1.448  | 2.011  | 0.037  | 0.1925  | 0.0037  | 0.63656  | 1119   | 12  | 1135   | 20  | 1089   | 19  | 1135   | 20  | 1.429848 |
| 11USS01_120.FIN2 | 108.9 | 0.4246 | 2.356  | 0.026  | 0.2116  | 0.002   | 0.3161   | 1228.8 | 7.8 | 1237   | 11  | 1220   | 13  | 1220   | 13  | 1.393443 |
| 11USS01_121.FIN2 | 89.3  | 1.292  | 2.118  | 0.022  | 0.1949  | 0.0018  | 0.30648  | 1156.2 | 7   | 1147.6 | 9.4 | 1172   | 14  | 1147.6 | 9.4 | 0.743816 |
| 11USS01_122.FIN2 | 459   | 1.86   | 0.1021 | 0.0024 | 0.01523 | 0.00021 | 0.32037  | 98.9   | 2.2 | 97.4   | 1.3 | 153    | 27  | 97.4   | 1.3 | 1.516684 |

|                 |       |        |        |        |         |         |          |        |     |        |     |        |     |        |     |          |
|-----------------|-------|--------|--------|--------|---------|---------|----------|--------|-----|--------|-----|--------|-----|--------|-----|----------|
| 11USS02_1.FIN2  | 80    | 2.83   | 3.61   | 0.051  | 0.2589  | 0.0036  | 0.42828  | 1550   | 11  | 1484   | 19  | 1631   | 14  | 1631   | 14  | 9.012876 |
| 11USS02_2.FIN2  | 121.1 | 0.709  | 4.425  | 0.073  | 0.2765  | 0.0052  | 0.83063  | 1719   | 14  | 1573   | 26  | 1885.6 | 9.9 | 1885.6 | 9.9 | 16.57828 |
| 11USS02_3.FIN2  | 199   | 1.81   | 0.1034 | 0.005  | 0.01357 | 0.00035 | 0.91569  | 98.4   | 3.7 | 86.9   | 2.2 | 402    | 42  | 86.9   | 2.2 | 11.68699 |
| 11USS02_4.FIN2  | 95.7  | 1.122  | 1.384  | 0.051  | 0.1379  | 0.0046  | 0.86574  | 879    | 22  | 832    | 26  | 985    | 20  | 832    | 26  | 5.346985 |
| 11USS02_5.FIN2  | 327   | 4.07   | 1.619  | 0.015  | 0.1602  | 0.0015  | 0.84798  | 977.4  | 5.9 | 957.6  | 8.3 | 1015   | 10  | 957.6  | 8.3 | 2.025783 |
| 11USS02_6.FIN2  | 261   | 13.7   | 1.513  | 0.071  | 0.1481  | 0.0049  | 0.94772  | 936    | 29  | 890    | 28  | 1023   | 31  | 890    | 28  | 4.91453  |
| 11USS02_7.FIN2  | 55    | 2.005  | 1.754  | 0.078  | 0.1448  | 0.0039  | 0.17302  | 1021   | 28  | 871    | 22  | 1327   | 71  | 871    | 22  | 14.69148 |
| 11USS02_8.FIN2  | 183   | 2.662  | 4.083  | 0.036  | 0.2764  | 0.0024  | 0.84342  | 1650.4 | 7.2 | 1575   | 13  | 1742.5 | 6.6 | 1742.5 | 6.6 | 9.612626 |
| 11USS02_9.FIN2  | 89    | 1.138  | 3.186  | 0.036  | 0.239   | 0.0027  | 0.64778  | 1454.1 | 8.7 | 1381   | 14  | 1562   | 9   | 1562   | 9   | 11.58771 |
| 11USS02_10.FIN2 | 169   | 2.75   | 3.998  | 0.063  | 0.2811  | 0.0053  | 0.66648  | 1632   | 13  | 1596   | 27  | 1700   | 14  | 1700   | 14  | 6.117647 |
| 11USS02_11.FIN2 | 72.9  | 1.493  | 2.606  | 0.053  | 0.2149  | 0.0037  | 0.77237  | 1301   | 15  | 1254   | 20  | 1392   | 16  | 1392   | 16  | 9.913793 |
| 11USS02_12.FIN2 | 12.19 | 1.257  | 1.323  | 0.045  | 0.1338  | 0.0038  | 0.15373  | 852    | 20  | 809    | 21  | 976    | 52  | 809    | 21  | 5.046948 |
| 11USS02_13.FIN2 | 204   | 2.194  | 0.1011 | 0.0045 | 0.01428 | 0.0005  | 0.65883  | 97.6   | 4.1 | 91.4   | 3.2 | 261    | 34  | 91.4   | 3.2 | 6.352459 |
| 11USS02_14.FIN2 | 324   | 5.47   | 4.575  | 0.097  | 0.289   | 0.005   | 0.81472  | 1744   | 18  | 1635   | 25  | 1885   | 12  | 1885   | 12  | 13.2626  |
| 11USS02_15.FIN2 | 1070  | 2.07   | 0.0764 | 0.0068 | 0.01115 | 0.00091 | 0.93554  | 74.3   | 6.4 | 71.4   | 5.8 | 203    | 36  | 71.4   | 5.8 | 3.903096 |
| 11USS02_16.FIN2 | 150.1 | 1.605  | 2.224  | 0.028  | 0.1989  | 0.0019  | 0.43953  | 1188   | 8.9 | 1170   | 10  | 1219   | 12  | 1170   | 10  | 1.515152 |
| 11USS02_17.FIN2 | 114.2 | 1.064  | 3.336  | 0.028  | 0.2569  | 0.0019  | 0.36923  | 1489.1 | 6.6 | 1474   | 9.5 | 1510   | 11  | 1510   | 11  | 2.384106 |
| 11USS02_18.FIN2 | 128   | 0.825  | 1.624  | 0.016  | 0.1632  | 0.0016  | 0.42281  | 979.1  | 6.1 | 974.3  | 9   | 1006   | 12  | 974.3  | 9   | 0.490246 |
| 11USS02_19.FIN2 | 81.4  | 0.986  | 4.21   | 0.05   | 0.2937  | 0.0032  | 0.60625  | 1675.1 | 9.8 | 1660   | 16  | 1706   | 10  | 1706   | 10  | 2.696366 |
| 11USS02_20.FIN2 | 56.7  | 0.8167 | 13.98  | 0.1    | 0.5256  | 0.0039  | 0.52234  | 2748.9 | 6.7 | 2723   | 16  | 2774.8 | 6.3 | 2774.8 | 6.3 | 1.866801 |
| 11USS02_21.FIN2 | 91.8  | 1.159  | 2.054  | 0.028  | 0.193   | 0.0025  | 0.41879  | 1133.2 | 9.2 | 1139   | 14  | 1144   | 14  | 1139   | 14  | 0.511825 |
| 11USS02_22.FIN2 | 396   | 1.41   | 2.339  | 0.07   | 0.1851  | 0.005   | 0.92995  | 1221   | 22  | 1094   | 27  | 1465   | 17  | 1094   | 27  | 10.40131 |
| 11USS02_23.FIN2 | 377   | 3.36   | 3.6    | 0.16   | 0.249   | 0.011   | 0.9555   | 1543   | 37  | 1429   | 57  | 1697   | 21  | 1697   | 21  | 15.79258 |
| 11USS02_24.FIN2 | 616   | 1.291  | 1.968  | 0.017  | 0.181   | 0.0017  | 0.78008  | 1104.2 | 5.9 | 1073.6 | 9.6 | 1174.6 | 7.6 | 1073.6 | 9.6 | 2.771237 |
| 11USS02_25.FIN2 | 640   | 2.19   | 0.0984 | 0.0037 | 0.01418 | 0.00046 | 0.73741  | 95.2   | 3.4 | 90.8   | 2.9 | 277    | 36  | 90.8   | 2.9 | 4.621849 |
| 11USS02_26.FIN2 | 67.1  | 0.638  | 2.134  | 0.054  | 0.1862  | 0.0033  | 0.68305  | 1162   | 17  | 1103   | 18  | 1261   | 22  | 1103   | 18  | 5.077453 |
| 11USS02_27.FIN2 | 38    | 1.456  | 1.678  | 0.035  | 0.1684  | 0.0027  | 0.20633  | 998    | 13  | 1003   | 15  | 1008   | 23  | 1003   | 15  | 0.501002 |
| 11USS02_28.FIN2 | 140.4 | 1.476  | 2.023  | 0.027  | 0.1912  | 0.0019  | 0.89905  | 1122.4 | 9.3 | 1128   | 10  | 1134   | 12  | 1128   | 10  | 0.498931 |
| 11USS02_29.FIN2 | 245   | 0.704  | 3.953  | 0.03   | 0.2849  | 0.0027  | 0.59483  | 1626   | 6.5 | 1616   | 13  | 1649.4 | 9.5 | 1649.4 | 9.5 | 2.024979 |
| 11USS02_30.FIN2 | 22.65 | 0.429  | 12.58  | 0.17   | 0.4792  | 0.0096  | 0.64826  | 2648   | 13  | 2522   | 42  | 2760   | 11  | 2760   | 11  | 8.623188 |
| 11USS02_31.FIN2 | 326   | 1.78   | 0.529  | 0.0074 | 0.06853 | 0.0005  | 0.27404  | 430.9  | 5   | 427.3  | 3   | 463    | 15  | 427.3  | 3   | 0.835461 |
| 11USS02_32.FIN2 | 402   | 0.985  | 3.751  | 0.045  | 0.2709  | 0.003   | 0.84255  | 1582.7 | 9.9 | 1545   | 15  | 1635.5 | 7.5 | 1635.5 | 7.5 | 5.533476 |
| 11USS02_33.FIN2 | 58.5  | 0.849  | 4.088  | 0.042  | 0.2817  | 0.0028  | 0.34136  | 1651.3 | 8.4 | 1600   | 14  | 1732   | 15  | 1732   | 15  | 7.621247 |
| 11USS02_34.FIN2 | 60.1  | 1.128  | 3.283  | 0.039  | 0.2518  | 0.0027  | 0.36239  | 1476.2 | 9.3 | 1448   | 14  | 1527   | 14  | 1527   | 14  | 5.173543 |
| 11USS02_35.FIN2 | 43.7  | 0.738  | 13.55  | 0.1    | 0.5226  | 0.005   | 0.60486  | 2718.4 | 7.3 | 2710   | 21  | 2732   | 9.1 | 2732   | 9.1 | 0.805271 |
| 11USS02_36.FIN2 | 237   | 1.415  | 2.903  | 0.026  | 0.2378  | 0.0018  | 0.62989  | 1383.2 | 6.8 | 1375.1 | 9.4 | 1403.5 | 7.1 | 1403.5 | 7.1 | 2.023513 |
| 11USS02_37.FIN2 | 187   | 2.249  | 4.571  | 0.033  | 0.3151  | 0.0022  | 0.6048   | 1745.1 | 6   | 1766   | 11  | 1733   | 5.9 | 1733   | 5.9 | 1.904212 |
| 11USS02_38.FIN2 | 37.55 | 1.611  | 0.587  | 0.016  | 0.0773  | 0.0013  | 0.018924 | 468    | 10  | 479.8  | 8   | 435    | 48  | 479.8  | 8   | 2.521368 |
| 11USS02_39.FIN2 | 100.9 | 0.682  | 0.6    | 0.011  | 0.0758  | 0.0011  | 0.12725  | 476.5  | 7.3 | 471.2  | 6.3 | 516    | 28  | 471.2  | 6.3 | 1.112277 |
| 11USS02_40.FIN2 | 107.4 | 1.266  | 0.4501 | 0.0096 | 0.06047 | 0.00079 | 0.27674  | 376.9  | 6.7 | 378.5  | 4.8 | 400    | 25  | 378.5  | 4.8 | 0.424516 |
| 11USS02_41.FIN2 | 272   | 3.78   | 0.498  | 0.0074 | 0.06515 | 0.00067 | 0.25498  | 410.1  | 5   | 406.8  | 4.1 | 460    | 19  | 406.8  | 4.1 | 0.804682 |
| 11USS02_42.FIN2 | 245   | 2.77   | 4.398  | 0.04   | 0.3075  | 0.0024  | 0.94125  | 1710   | 7.9 | 1726   | 13  | 1698   | 5.8 | 1698   | 5.8 | 1.648999 |
| 11USS02_43.FIN2 | 174.9 | 1.93   | 3.294  | 0.045  | 0.2574  | 0.0039  | 0.84195  | 1479   | 11  | 1476   | 20  | 1492   | 11  | 1492   | 11  | 1.072386 |
| 11USS02_44.FIN2 | 132.4 | 1.38   | 3.897  | 0.034  | 0.2887  | 0.0028  | 0.59943  | 1612.6 | 7.1 | 1635   | 14  | 1590.5 | 9.7 | 1590.5 | 9.7 | 2.797862 |
| 11USS02_45.FIN2 | 156.3 | 0.526  | 13.265 | 0.095  | 0.5252  | 0.0042  | 0.6526   | 2698.3 | 6.7 | 2721   | 18  | 2684.4 | 6.4 | 2684.4 | 6.4 | 1.363433 |
| 11USS02_46.FIN2 | 22.33 | 0.442  | 1.383  | 0.034  | 0.1472  | 0.0025  | 0.29962  | 881    | 15  | 885    | 14  | 881    | 28  | 885    | 14  | 0.45403  |
| 11USS02_47.FIN2 | 30.6  | 1.348  | 3.42   | 0.063  | 0.2576  | 0.0034  | 0.49406  | 1508   | 14  | 1477   | 18  | 1564   | 17  | 1564   | 17  | 5.56266  |
| 11USS02_48.FIN2 | 172   | 1.156  | 2.257  | 0.028  | 0.2027  | 0.0022  | 0.589    | 1198.1 | 8.7 | 1190   | 12  | 1214   | 17  | 1190   | 12  | 0.67607  |
| 11USS02_49.FIN2 | 123   | 0.55   | 4.726  | 0.047  | 0.3221  | 0.0028  | 0.50067  | 1771.2 | 8.3 | 1800   | 13  | 1752.8 | 8.5 | 1752.8 | 8.5 | 2.662983 |

|                  |       |        |        |        |         |         |          |        |     |        |     |        |     |        |     |            |
|------------------|-------|--------|--------|--------|---------|---------|----------|--------|-----|--------|-----|--------|-----|--------|-----|------------|
| 11USS02_50.FIN2  | 424   | 1.563  | 2.594  | 0.014  | 0.2245  | 0.0013  | 0.44031  | 1298.7 | 4.1 | 1305.5 | 6.8 | 1305.4 | 7.2 | 1305.4 | 7.2 | 0.00766    |
| 11USS02_51.FIN2  | 100.2 | 2.56   | 3.205  | 0.059  | 0.2549  | 0.0037  | 0.95257  | 1452   | 17  | 1463   | 19  | 1448   | 19  | 1448   | 19  | 1.035912   |
| 11USS02_52.FIN2  | 76.1  | 0.7849 | 4.564  | 0.086  | 0.2959  | 0.003   | 0.48322  | 1740   | 15  | 1671   | 15  | 1832   | 31  | 1832   | 31  | 8.78821    |
| 11USS02_53.FIN2  | 151.3 | 1.4    | 7.009  | 0.055  | 0.3834  | 0.0035  | 0.70975  | 2112.2 | 6.9 | 2092   | 16  | 2140.2 | 6.9 | 2140.2 | 6.9 | 2.252126   |
| 11USS02_54.FIN2  | 307   | 1.216  | 2.179  | 0.026  | 0.1988  | 0.0021  | 0.8737   | 1173.7 | 8.3 | 1169   | 12  | 1181   | 10  | 1169   | 12  | 0.400443   |
| 11USS02_55.FIN2  | 166   | 2.1    | 2.78   | 0.096  | 0.2267  | 0.0051  | 0.92681  | 1343   | 28  | 1320   | 26  | 1406   | 32  | 1406   | 32  | 6.116643   |
| 11USS02_56.FIN2  | 270   | 0.726  | 4.283  | 0.032  | 0.2973  | 0.002   | 0.53785  | 1689.7 | 6.1 | 1677.9 | 9.9 | 1715.5 | 7.9 | 1715.5 | 7.9 | 2.191781   |
| 11USS02_57.FIN2  | 155.4 | 1.244  | 1.272  | 0.027  | 0.1334  | 0.0023  | 0.894    | 832    | 12  | 807    | 13  | 901    | 14  | 807    | 13  | 3.004808   |
| 11USS02_58.FIN2  | 155.4 | 1.087  | 3.044  | 0.031  | 0.2421  | 0.002   | 0.71005  | 1418.3 | 7.8 | 1398   | 10  | 1455.4 | 8.5 | 1455.4 | 8.5 | 3.943933   |
| 11USS02_59.FIN2  | 102.4 | 2.12   | 3.626  | 0.034  | 0.2644  | 0.0025  | 0.75379  | 1554.7 | 7.5 | 1514   | 13  | 1622   | 11  | 1622   | 11  | 6.658446   |
| 11USS02_60.FIN2  | 86.3  | 0.861  | 4.01   | 0.034  | 0.2936  | 0.0022  | 0.33974  | 1635.7 | 6.9 | 1659   | 11  | 1616.5 | 9.2 | 1616.5 | 9.2 | 2.629137   |
| 11USS02_61.FIN2  | 80.6  | 0.993  | 2.789  | 0.046  | 0.2278  | 0.0027  | 0.66191  | 1351   | 12  | 1323   | 14  | 1391   | 16  | 1391   | 16  | 4.888569   |
| 11USS02_62.FIN2  | 71.6  | 1.313  | 2.994  | 0.044  | 0.241   | 0.0028  | 0.81506  | 1407   | 12  | 1392   | 15  | 1447   | 13  | 1447   | 13  | 3.800968   |
| 11USS02_63.FIN2  | 423   | 15.5   | 0.4853 | 0.0092 | 0.0636  | 0.0012  | 0.92051  | 401.4  | 6.3 | 397.1  | 7.3 | 423    | 19  | 397.1  | 7.3 | 1.071251   |
| 11USS02_64.FIN2  | 229   | 9.46   | 0.5183 | 0.0063 | 0.0679  | 0.00058 | 0.27803  | 423.9  | 4.2 | 423.5  | 3.5 | 442    | 18  | 423.5  | 3.5 | 0.094362   |
| 11USS02_65.FIN2  | 504   | 5.06   | 2.605  | 0.029  | 0.2227  | 0.0025  | 0.89512  | 1302.8 | 8.5 | 1296   | 13  | 1320.2 | 7.9 | 1320.2 | 7.9 | 1.833056   |
| 11USS02_66.FIN2  | 333.5 | 1.92   | 0.4204 | 0.0067 | 0.0562  | 0.001   | 0.61016  | 356.1  | 4.8 | 352.2  | 6.4 | 400    | 24  | 352.2  | 6.4 | 1.095198   |
| 11USS02_67.FIN2  | 130.3 | 1.138  | 0.215  | 0.011  | 0.0287  | 0.00077 | 0.6969   | 198    | 8.6 | 182.4  | 4.8 | 414    | 54  | 182.4  | 4.8 | 7.878788   |
| 11USS02_68.FIN2  | 489   | 2.205  | 2.54   | 0.024  | 0.2184  | 0.0019  | 0.83913  | 1284   | 6.9 | 1273.4 | 9.9 | 1307.8 | 6.9 | 1307.8 | 6.9 | 2.630372   |
| 11USS02_69.FIN2  | 57    | 0.896  | 6.716  | 0.081  | 0.3864  | 0.0044  | 0.54581  | 2074   | 11  | 2108   | 20  | 2041.9 | 9.5 | 2041.9 | 9.5 | 3.237181   |
| 11USS02_70.FIN2  | 105.4 | 0.4474 | 1.382  | 0.016  | 0.1438  | 0.0014  | 0.17187  | 881.7  | 6.7 | 866.1  | 8   | 925    | 14  | 866.1  | 8   | 1.769309   |
| 11USS02_71.FIN2  | 174   | 1.882  | 2.007  | 0.021  | 0.1865  | 0.0021  | 0.6506   | 1118.3 | 7.4 | 1102   | 12  | 1155   | 10  | 1102   | 12  | 1.45757    |
| 11USS02_72.FIN2  | 261   | 1.208  | 0.0938 | 0.0026 | 0.01409 | 0.00019 | 0.33988  | 91     | 2.4 | 90.2   | 1.2 | 151    | 26  | 90.2   | 1.2 | 0.879121   |
| 11USS02_73.FIN2  | 447   | 1.09   | 0.541  | 0.015  | 0.0702  | 0.0012  | 0.95827  | 438.2  | 9.6 | 437.2  | 7.2 | 431    | 17  | 437.2  | 7.2 | 0.228206   |
| 11USS02_74.FIN2  | 31.8  | 0.602  | 14.49  | 0.26   | 0.5314  | 0.0084  | 0.96316  | 2772   | 23  | 2745   | 36  | 2807   | 13  | 2807   | 13  | 2.208764   |
| 11USS02_75.FIN2  | 314.2 | 21.6   | 0.5202 | 0.0081 | 0.06914 | 0.00088 | 0.4615   | 425    | 5.4 | 430.9  | 5.3 | 410    | 18  | 430.9  | 5.3 | 1.388235   |
| 11USS02_76.FIN2  | 349   | 2.18   | 1.939  | 0.037  | 0.1786  | 0.0029  | 0.74584  | 1095   | 13  | 1059   | 16  | 1152   | 19  | 1059   | 16  | 3.287671   |
| 11USS02_77.FIN2  | 90    | 0.79   | 2.073  | 0.03   | 0.1935  | 0.0034  | 0.49169  | 1138.9 | 9.9 | 1140   | 18  | 1137   | 22  | 1140   | 18  | 0.096584   |
| 11USS02_78.FIN2  | 434   | 2.13   | 2.403  | 0.019  | 0.2161  | 0.0018  | 0.64132  | 1243.1 | 5.5 | 1261.3 | 9.3 | 1214.2 | 7.9 | 1214.2 | 7.9 | 3.879097   |
| 11USS02_79.FIN2  | 86    | 0.932  | 2.065  | 0.029  | 0.1946  | 0.0023  | 0.47807  | 1136.4 | 9.6 | 1146   | 13  | 1116   | 15  | 1146   | 13  | 0.844773   |
| 11USS02_80.FIN2  | 82.1  | 1.852  | 1.817  | 0.039  | 0.1758  | 0.0042  | 0.54472  | 1053   | 13  | 1046   | 23  | 1054   | 24  | 1046   | 23  | 0.664767   |
| 11USS02_81.FIN2  | 65.5  | 0.365  | 3      | 0.24   | 0.2225  | 0.0036  | 0.7027   | 1355   | 39  | 1295   | 19  | 1530   | 100 | 1530   | 100 | 15.35948   |
| 11USS02_82.FIN2  | 113   | 1.423  | 0.0965 | 0.0043 | 0.0149  | 0.00038 | 0.09152  | 93.4   | 4   | 95.3   | 2.4 | 216    | 46  | 95.3   | 2.4 | 2.034261   |
| 11USS02_83.FIN2  | 569   | 1.353  | 0.0972 | 0.0027 | 0.0138  | 0.00017 | 0.087966 | 94.1   | 2.5 | 88.4   | 1.1 | 290    | 46  | 88.4   | 1.1 | 6.057386   |
| 11USS02_84.FIN2  | 172.6 | 2.242  | 6.287  | 0.041  | 0.3775  | 0.0025  | 0.67468  | 2016.3 | 5.7 | 2065   | 12  | 1979.5 | 6   | 1979.5 | 6   | 4.319273   |
| 11USS02_85.FIN2  | 83    | 1.161  | 3.512  | 0.055  | 0.2733  | 0.0039  | 0.71051  | 1528   | 12  | 1559   | 19  | 1485   | 13  | 1485   | 13  | 4.983165   |
| 11USS02_86.FIN2  | 277   | 0.98   | 2.702  | 0.03   | 0.2296  | 0.0019  | 0.55192  | 1328.5 | 8.2 | 1332.4 | 9.8 | 1321   | 11  | 1321   | 11  | 0.862983   |
| 11USS02_87.FIN2  | 113.1 | 0.78   | 27.52  | 0.32   | 0.6668  | 0.007   | 0.66101  | 3402   | 12  | 3296   | 28  | 3464.2 | 6.8 | 3464.2 | 6.8 | 4.855378   |
| 11USS02_88.FIN2  | 118   | 0.971  | 1.791  | 0.022  | 0.1771  | 0.0019  | 0.22813  | 1043.8 | 8.5 | 1051   | 10  | 1034   | 17  | 1051   | 10  | 0.689787   |
| 11USS02_89.FIN2  | 156.1 | 0.2744 | 0.7009 | 0.0095 | 0.08738 | 0.00089 | 0.36649  | 539    | 5.7 | 540    | 5.3 | 565    | 21  | 540    | 5.3 | 0.185529   |
| 11USS02_90.FIN2  | 198   | 0.796  | 0.818  | 0.013  | 0.0983  | 0.0013  | 0.42066  | 606.5  | 7.1 | 604.1  | 7.8 | 638    | 19  | 604.1  | 7.8 | 0.395713   |
| 11USS02_91.FIN2  | 321   | 1.305  | 2.236  | 0.028  | 0.2039  | 0.0022  | 0.84217  | 1191.8 | 8.8 | 1196   | 12  | 1198.1 | 6.8 | 1196   | 12  | 0.352408   |
| 11USS02_92.FIN2  | 687   | 3.382  | 10.909 | 0.065  | 0.4817  | 0.0024  | 0.72209  | 2515.8 | 5.4 | 2534   | 11  | 2505.3 | 3.9 | 2505.3 | 3.9 | 1.145571   |
| 11USS02_93.FIN2  | 96.6  | 0.7786 | 5.225  | 0.045  | 0.3371  | 0.0024  | 0.29307  | 1857.1 | 7.2 | 1872   | 12  | 1837.7 | 9.7 | 1837.7 | 9.7 | 1.866464   |
| 11USS02_94.FIN2  | 220.8 | 1.985  | 0.828  | 0.012  | 0.1     | 0.0014  | 0.50322  | 611.8  | 6.8 | 614.4  | 8   | 621    | 22  | 614.4  | 8   | 0.424975   |
| 11USS02_95.FIN2  | 65    | 2.05   | 2.516  | 0.071  | 0.221   | 0.0044  | 0.77366  | 1278   | 20  | 1292   | 22  | 1255   | 23  | 1255   | 23  | 2.948207   |
| 11USS02_96.FIN2  | 738   | 1.39   | 0.0923 | 0.0018 | 0.01393 | 0.0002  | 0.51444  | 89.6   | 1.7 | 89.2   | 1.2 | 161    | 24  | 89.2   | 1.2 | 0.446429   |
| 11USS02_97.FIN2  | 426   | 2.239  | 1.692  | 0.015  | 0.1684  | 0.0013  | 0.653    | 1005.1 | 5.5 | 1003.5 | 6.9 | 1011.8 | 8.1 | 1003.5 | 6.9 | 0.159188   |
| 11USS02_98.FIN2  | 85.1  | 0.991  | 4.925  | 0.054  | 0.3288  | 0.0027  | 0.54922  | 1805.7 | 9.2 | 1832   | 13  | 1778   | 11  | 1778   | 11  | 3.03712    |
| 11USS02_99.FIN2  | 129.4 | 1.047  | 4.645  | 0.034  | 0.3095  | 0.0018  | 0.44159  | 1757.1 | 6.2 | 1738.2 | 8.9 | 1781.8 | 6.4 | 1781.8 | 6.4 | 2.446964   |
| 11USS02_100.FIN2 | 51.4  | 1.726  | 1.576  | 0.025  | 0.1629  | 0.0019  | 0.095721 | 961    | 10  | 973    | 10  | 948    | 26  | 973    | 10  | 1.248699   |
| 11USS02_101.FIN2 | 197   | 0.98   | 6.32   | 0.078  | 0.3647  | 0.004   | 0.8938   | 2020   | 11  | 2007   | 20  | 2035   | 7.3 | 2035   | 7.3 | 1.375921   |
| 11USS02_102.FIN2 | 22.03 | 0.85   | 14.05  | 0.52   | 0.527   | 0.015   | 0.85779  | 2747   | 35  | 2724   | 64  | 2750   | 25  | 2750   | 25  | 0.945455   |
| 11USS02_103.FIN2 | 82.7  | 0.954  | 4.083  | 0.045  | 0.2928  | 0.0033  | 0.63701  | 1650.1 | 9.1 | 1655   | 16  | 1650   | 11  | 1650   | 11  | 0.30303    |
| 11USS02_104.FIN2 | 242   | 1.869  | 4.249  | 0.038  | 0.2934  | 0.0026  | 0.89914  | 1684.6 | 7.9 | 1658   | 13  | 1721   | 7.1 | 1721   | 7.1 | 3.660662   |
| 11USS02_105.FIN2 | 63.3  | 1.075  | 2.074  | 0.03   | 0.193   | 0.0018  | 0.32064  | 1141   | 10  | 1137.2 | 9.7 | 1141   | 20  | 1137.2 | 9.7 | 0.333041   |
| 11USS02_106.FIN2 | 117   | 0.645  | 5.744  | 0.067  | 0.3491  | 0.0032  | 0.66713  | 1938   | 10  | 1930   | 15  | 1949   | 12  | 1949   | 12  | 0.974859   |
| 11USS02_107.FIN2 | 539   | 1.496  | 0.0918 | 0.0021 | 0.01412 | 0.00014 | 0.166    | 89.1   | 2   | 90.37  | 0.9 | 143    | 22  | 90.37  | 0.9 | 1.425365   |
| 11USS02_108.FIN2 | 334   | 1.74   | 0.4851 | 0.0057 | 0.06393 | 0.00052 | 0.78968  | 401.4  | 3.9 | 399.5  | 3.2 | 405    | 14  | 399.5  | 3.2 | 0.473343   |
| 11USS02_109.FIN2 | 32.3  | 0.523  | 0.582  | 0.022  | 0.0743  | 0.0014  | 0.068962 | 466    | 14  | 461.9  | 8.7 | 538    | 58  | 461.9  | 8.7 | 0.879828   |
| 11USS02_110.FIN2 | 90.8  | 0.703  | 4.075  | 0.033  | 0.295   | 0.0024  | 0.50515  | 1648.9 | 6.6 | 1666   | 12  | 1634.5 | 8.2 | 1634.5 | 8.2 | 1.927195   |
| 11USS02_111.FIN2 | 243   | 2.16   | 2.174  | 0.048  | 0.1827  | 0.0039  | 0.86614  | 1172   | 15  | 1081   | 21  | 1357   | 15  | 1081   | 21  | 7.764505   |
| 11USS02_112.FIN2 | 129   | 1.164  | 0.711  | 0.01   | 0.08722 | 0.00082 | 0.31516  | 545    | 6   | 539    | 4.8 | 591    | 20  | 539    | 4.8 | 1.100917   |
| 11USS02_113.FIN2 | 22.85 | 0.735  | 0.587  | 0.026  | 0.0738  | 0.0018  | 0.2482   | 466    | 17  | 459    | 11  | 574    | 45  | 459    | 11  | 1.502146   |
| 11USS02_114.FIN2 | 51.2  | 1.444  | 1.981  | 0.036  | 0.1859  | 0.0026  | 0.16287  | 1109   | 13  | 1099   | 14  | 1145   | 22  | 1099   | 14  | 0.901713   |
| 11USS02_115.FIN2 | 121.9 | 0.966  | 2.163  | 0.021  | 0.2005  | 0.0015  | 0.29582  | 1168.9 | 6.9 | 1178   | 8.3 | 1149   | 13  | 1178   | 8.3 | 0.77851    |
| 11USS02_116.FIN2 | 11.82 | 1.231  | 2.63   | 0.1    | 0.2182  | 0.0056  | 0.37859  | 1303   | 29  | 1272   | 29  | 1348   | 41  | 1348   | 41  | 5.637982   |
| 11USS02_117.FIN2 | 169.4 | 1.737  | 2.539  | 0.028  | 0.2147  | 0.0021  | 0.48737  | 1282.7 | 8   | 1254   | 11  | 1330   | 11  | 1330   | 11  | 5.714286   |
| 11USS02_118.FIN2 | 341   | 1.172  | 0.093  | 0.0032 | 0.01379 | 0.00022 | 0.014774 | 90.3   | 2.9 | 88.3   | 1.4 | 243    | 55  | 88.3   | 1.4 | 2.214839   |
| 11USS02_119.FIN2 | 153   | 1.112  | 1.625  | 0.019  | 0.166   | 0.0015  | 0.2497   | 979.5  | 7.5 | 990.1  | 8.1 | 956    | 19  | 990.1  | 8.1 | 1.082185   |
| 11USS02_120.FIN2 | 48.2  | 0.722  | 0.71   | 0.017  | 0.0865  | 0.0014  | 0.14433  | 546.5  | 9.5 | 534.5  | 8.1 | 617    | 41  | 534.5  | 8.1 | 2.195791</ |

|                 |       |       |        |        |         |         |          |        |     |       |     |      |     |       |      |          |
|-----------------|-------|-------|--------|--------|---------|---------|----------|--------|-----|-------|-----|------|-----|-------|------|----------|
| 11USS04_17.FIN2 | 61.3  | 0.972 | 1.843  | 0.031  | 0.1765  | 0.0026  | 0.17497  | 1060   | 11  | 1047  | 14  | 1091 | 44  | 1047  | 14   | 1.226415 |
| 11USS04_18.FIN2 | 244.3 | 2.99  | 2.394  | 0.042  | 0.203   | 0.0032  | 0.76635  | 1240   | 13  | 1191  | 17  | 1325 | 23  | 1191  | 17   | 3.951613 |
| 11USS04_19.FIN2 | 150.8 | 1.488 | 1.378  | 0.03   | 0.1371  | 0.0026  | 0.65124  | 881    | 12  | 828   | 15  | 1016 | 31  | 828   | 15   | 6.015891 |
| 11USS04_20.FIN2 | 218   | 1.625 | 0.532  | 0.011  | 0.0697  | 0.0012  | 0.49052  | 435.2  | 7.2 | 434.3 | 7.5 | 440  | 40  | 434.3 | 7.5  | 0.206801 |
| 11USS04_21.FIN2 | 90    | 0.844 | 13.37  | 0.15   | 0.5061  | 0.0059  | 0.71409  | 2705   | 10  | 2639  | 25  | 2769 | 16  | 2769  | 16   | 4.694836 |
| 11USS04_22.FIN2 | 515   | 22.2  | 0.744  | 0.017  | 0.0907  | 0.0013  | 0.4849   | 564.2  | 9.7 | 559.6 | 7.7 | 605  | 49  | 559.6 | 7.7  | 0.815314 |
| 11USS04_23.FIN2 | 560   | 1.803 | 0.5431 | 0.0064 | 0.07006 | 0.00087 | 0.41181  | 440.3  | 4.2 | 436.5 | 5.2 | 470  | 29  | 436.5 | 5.2  | 0.863048 |
| 11USS04_24.FIN2 | 130   | 3.16  | 3.956  | 0.041  | 0.2885  | 0.0029  | 0.55159  | 1625.8 | 8.6 | 1634  | 14  | 1610 | 21  | 1610  | 21   | 1.490683 |
| 11USS04_25.FIN2 | 173   | 0.877 | 4.457  | 0.048  | 0.3077  | 0.003   | 0.51988  | 1722.2 | 8.9 | 1729  | 15  | 1723 | 19  | 1723  | 19   | 0.34823  |
| 11USS04_26.FIN2 | 272   | 3.37  | 4.487  | 0.042  | 0.3054  | 0.0027  | 0.61147  | 1730   | 7.7 | 1718  | 13  | 1740 | 16  | 1740  | 16   | 1.264368 |
| 11USS04_27.FIN2 | 87.2  | 2.78  | 13.33  | 0.25   | 0.4199  | 0.0067  | 0.74367  | 2701   | 18  | 2259  | 30  | 3058 | 20  | 3058  | 20   | 26.12819 |
| 11USS04_28.FIN2 | 633   | 2.34  | 0.1759 | 0.004  | 0.02534 | 0.00045 | 0.27942  | 164.5  | 3.5 | 161.3 | 2.8 | 175  | 51  | 161.3 | 2.8  | 1.945289 |
| 11USS04_29.FIN2 | 211.5 | 2.29  | 1.597  | 0.021  | 0.16    | 0.0024  | 0.39413  | 968.6  | 8.2 | 956   | 13  | 1005 | 33  | 956   | 13   | 1.300847 |
| 11USS04_30.FIN2 | 372   | 1.967 | 2.371  | 0.027  | 0.2104  | 0.0023  | 0.5713   | 1233.2 | 7.9 | 1231  | 12  | 1231 | 18  | 1231  | 18   | 0        |
| 11USS04_31.FIN2 | 659   | 2.534 | 5.303  | 0.073  | 0.3347  | 0.0045  | 0.91712  | 1868   | 12  | 1861  | 22  | 1872 | 13  | 1872  | 13   | 0.587607 |
| 11USS04_32.FIN2 | 307   | 2.449 | 0.148  | 0.012  | 0.01788 | 0.00035 | 0.38775  | 139    | 11  | 114.3 | 2.2 | 500  | 150 | 114.3 | 2.2  | 17.76978 |
| 11USS04_33.FIN2 | 230   | 2.243 | 2.046  | 0.035  | 0.1887  | 0.0023  | 0.33499  | 1130   | 12  | 1114  | 13  | 1176 | 33  | 1114  | 13   | 1.415929 |
| 11USS04_34.FIN2 | 221   | 1.17  | 1.438  | 0.04   | 0.1343  | 0.0037  | 0.18064  | 903    | 17  | 812   | 21  | 1144 | 39  | 812   | 21   | 10.07752 |
| 11USS04_35.FIN2 | 342   | 3.65  | 3.018  | 0.034  | 0.2434  | 0.0033  | 0.61707  | 1412.6 | 8.8 | 1404  | 17  | 1411 | 20  | 1411  | 20   | 0.496102 |
| 11USS04_36.FIN2 | 122   | 2.12  | 5.686  | 0.053  | 0.3411  | 0.0029  | 0.44731  | 1929.7 | 8.4 | 1892  | 14  | 1947 | 19  | 1947  | 19   | 2.824859 |
| 11USS04_37.FIN2 | 138.6 | 1.224 | 4.135  | 0.081  | 0.2934  | 0.0056  | 0.63469  | 1661   | 16  | 1658  | 28  | 1649 | 36  | 1649  | 36   | 0.545785 |
| 11USS04_39.FIN2 | 310   | 2.52  | 0.5203 | 0.0098 | 0.06899 | 0.00073 | 0.24649  | 425    | 6.6 | 430   | 4.4 | 388  | 45  | 430   | 4.4  | 1.176471 |
| 11USS04_40.FIN2 | 260   | 2.34  | 3.4    | 0.1    | 0.2458  | 0.0066  | 0.8586   | 1500   | 24  | 1416  | 34  | 1634 | 26  | 1634  | 26   | 13.34149 |
| 11USS04_41.FIN2 | 720   | 2.827 | 4.087  | 0.034  | 0.2904  | 0.0032  | 0.73815  | 1651.3 | 6.9 | 1643  | 16  | 1652 | 15  | 1652  | 15   | 0.544794 |
| 11USS04_42.FIN2 | 144   | 1.123 | 0.519  | 0.013  | 0.0674  | 0.0013  | 0.54333  | 424    | 8.4 | 420.4 | 7.9 | 439  | 45  | 420.4 | 7.9  | 0.849057 |
| 11USS04_44.FIN2 | 283.7 | 1.565 | 0.1089 | 0.0042 | 0.01563 | 0.00038 | 0.47044  | 104.9  | 3.8 | 100   | 2.4 | 196  | 86  | 100   | 2.4  | 4.671115 |
| 11USS04_45.FIN2 | 218   | 2.877 | 2.377  | 0.026  | 0.2106  | 0.0019  | 0.49352  | 1236.2 | 8.1 | 1232  | 10  | 1239 | 21  | 1239  | 21   | 0.564972 |
| 11USS04_46.FIN2 | 231.1 | 1.077 | 4.108  | 0.041  | 0.2878  | 0.0025  | 0.50429  | 1655.4 | 8.1 | 1631  | 13  | 1678 | 18  | 1678  | 18   | 2.800954 |
| 11USS04_47.FIN2 | 269.2 | 1.536 | 4.138  | 0.052  | 0.2853  | 0.0036  | 0.65277  | 1661   | 10  | 1618  | 18  | 1698 | 21  | 1698  | 21   | 4.711425 |
| 11USS04_48.FIN2 | 246   | 3.47  | 3.84   | 0.066  | 0.2708  | 0.0059  | 0.70192  | 1599   | 14  | 1543  | 30  | 1666 | 28  | 1666  | 28   | 7.382953 |
| 11USS04_49.FIN2 | 88    | 0.961 | 0.562  | 0.018  | 0.071   | 0.0012  | 0.19637  | 451    | 11  | 442.1 | 7.1 | 471  | 72  | 442.1 | 7.1  | 1.973932 |
| 11USS04_50.FIN2 | 95.5  | 1.046 | 4.4    | 0.16   | 0.2836  | 0.0075  | 0.66476  | 1708   | 31  | 1609  | 38  | 1818 | 56  | 1818  | 56   | 11.49615 |
| 11USS04_51.FIN2 | 289   | 1.085 | 1.837  | 0.021  | 0.1747  | 0.002   | 0.3258   | 1059.2 | 7.5 | 1038  | 11  | 1072 | 25  | 1038  | 11   | 2.001511 |
| 11USS04_52.FIN2 | 443   | 2.374 | 1.893  | 0.053  | 0.1696  | 0.0035  | 0.33281  | 1078   | 19  | 1010  | 19  | 1186 | 54  | 1010  | 19   | 6.307978 |
| 11USS04_52.FIN2 | 341.6 | 1.931 | 2.112  | 0.026  | 0.1938  | 0.0026  | 0.69382  | 1152.3 | 8.4 | 1144  | 14  | 1153 | 20  | 1144  | 14   | 0.720299 |
| 11USS04_54.FIN2 | 617   | 1.912 | 0.1044 | 0.0025 | 0.01577 | 0.00022 | 0.28158  | 100.8  | 2.3 | 100.8 | 1.4 | 64   | 46  | 100.8 | 1.4  | 0        |
| 11USS04_55.FIN2 | 307   | 1.799 | 3.469  | 0.048  | 0.2423  | 0.0026  | 0.71258  | 1521   | 11  | 1398  | 13  | 1697 | 17  | 1697  | 17   | 17.61933 |
| 11USS04_56.FIN2 | 589   | 2.26  | 2.305  | 0.035  | 0.1807  | 0.0037  | 0.61797  | 1214   | 11  | 1070  | 20  | 1472 | 29  | 1070  | 20   | 11.86161 |
| 11USS04_57.FIN2 | 176   | 2.69  | 1.777  | 0.044  | 0.1683  | 0.0038  | 0.74367  | 1037   | 16  | 1005  | 21  | 1096 | 33  | 1005  | 21   | 3.085824 |
| 11USS04_58.FIN2 | 76.2  | 3.42  | 2.233  | 0.058  | 0.1966  | 0.0041  | 0.60872  | 1188   | 18  | 1156  | 22  | 1258 | 39  | 1156  | 22   | 2.693603 |
| 11USS04_59.FIN2 | 319   | 3.35  | 4.818  | 0.041  | 0.3206  | 0.0029  | 0.77558  | 1787.6 | 7.2 | 1792  | 14  | 1774 | 12  | 1774  | 12   | 1.014656 |
| 11USS04_60.FIN2 | 555   | 1.647 | 0.789  | 0.013  | 0.09443 | 0.00096 | 0.47601  | 590.5  | 7.2 | 581.7 | 5.6 | 615  | 32  | 581.7 | 5.6  | 1.490262 |
| 11USS04_61.FIN2 | 171   | 1.708 | 3.673  | 0.062  | 0.2608  | 0.0048  | 0.78939  | 1567   | 14  | 1493  | 24  | 1663 | 23  | 1663  | 23   | 10.22249 |
| 11USS04_62.FIN2 | 84    | 3.285 | 1.054  | 0.035  | 0.1021  | 0.0028  | 0.31016  | 730    | 17  | 627   | 17  | 1090 | 72  | 627   | 17   | 14.10959 |
| 11USS04_63.FIN2 | 113   | 2.27  | 1.622  | 0.031  | 0.1655  | 0.0022  | 0.28319  | 977    | 12  | 987   | 12  | 958  | 38  | 987   | 12   | 1.023541 |
| 11USS04_64.FIN2 | 291   | 1.228 | 0.947  | 0.026  | 0.0996  | 0.0015  | 0.4914   | 675    | 13  | 612.2 | 8.6 | 943  | 46  | 612.2 | 8.6  | 9.303704 |
| 11USS04_65.FIN2 | 225   | 2.805 | 3.538  | 0.032  | 0.2684  | 0.0026  | 0.57448  | 1535.3 | 7.1 | 1533  | 13  | 1537 | 16  | 1537  | 16   | 0.260247 |
| 11USS04_66.FIN2 | 95.2  | 3.34  | 3.568  | 0.063  | 0.2438  | 0.005   | 0.74587  | 1541   | 14  | 1405  | 26  | 1712 | 27  | 1712  | 27   | 17.93224 |
| 11USS04_67.FIN2 | 281   | 3.659 | 4.708  | 0.036  | 0.3162  | 0.0025  | 0.55863  | 1768.2 | 6.3 | 1771  | 12  | 1751 | 13  | 1751  | 13   | 1.142204 |
| 11USS04_68.FIN2 | 460   | 18.4  | 4.004  | 0.053  | 0.281   | 0.0029  | 0.64479  | 1634   | 11  | 1596  | 15  | 1659 | 20  | 1659  | 20   | 3.797468 |
| 11USS04_69.FIN2 | 76.1  | 0.89  | 13.73  | 0.24   | 0.4881  | 0.0083  | 0.75476  | 2729   | 16  | 2569  | 36  | 2834 | 22  | 2834  | 22   | 9.350741 |
| 11USS04_70.FIN2 | 730   | 3.82  | 0.4886 | 0.0077 | 0.0614  | 0.0011  | 0.67906  | 403.7  | 5.3 | 384.3 | 7   | 541  | 35  | 384.3 | 7    | 4.805549 |
| 11USS04_71.FIN2 | 482   | 1.96  | 0.0925 | 0.0024 | 0.01388 | 0.00025 | 0.20201  | 89.7   | 2.2 | 88.9  | 1.6 | 129  | 59  | 88.9  | 1.6  | 0.891862 |
| 11USS04_72.FIN2 | 219   | 2.38  | 13.22  | 0.55   | 0.498   | 0.019   | 0.96221  | 2697   | 39  | 2601  | 83  | 2747 | 16  | 2747  | 16   | 5.314889 |
| 11USS04_73.FIN2 | 178   | 2.25  | 4.226  | 0.041  | 0.2958  | 0.003   | 0.4661   | 1678.4 | 7.9 | 1670  | 15  | 1679 | 18  | 1679  | 18   | 0.536033 |
| 11USS04_74.FIN2 | 374   | 1.879 | 0.11   | 0.0037 | 0.0164  | 0.00029 | 0.16054  | 105.9  | 3.4 | 104.9 | 1.8 | 159  | 77  | 104.9 | 1.8  | 0.944287 |
| 11USS04_75.FIN2 | 278   | 1.152 | 0.677  | 0.013  | 0.0853  | 0.0011  | 0.25667  | 524.8  | 7.7 | 527.7 | 6.4 | 514  | 48  | 527.7 | 6.4  | 0.552591 |
| 11USS04_76.FIN2 | 161   | 1.434 | 0.844  | 0.016  | 0.0993  | 0.0014  | 0.15431  | 621.7  | 8.9 | 610.2 | 8.2 | 671  | 48  | 610.2 | 8.2  | 1.849767 |
| 11USS04_77.FIN2 | 3.71  | 0     | 1.06   | 0.13   | 0.0805  | 0.0057  | 0.007606 | 739    | 61  | 497   | 34  | 1480 | 250 | DISC  | DISC | 66.41892 |
| 11USS04_78.FIN2 | 1020  | 1.4   | 0.1114 | 0.0045 | 0.01493 | 0.00019 | 0.088204 | 107    | 4.1 | 95.5  | 1.2 | 362  | 90  | 95.5  | 1.2  | 10.74766 |
| 11USS04_79.FIN2 | 646   | 1.81  | 0.114  | 0.0049 | 0.01546 | 0.00034 | 0.35044  | 109.4  | 4.5 | 98.9  | 2.2 | 307  | 90  | 98.9  | 2.2  | 9.597806 |
| 11USS04_80.FIN2 | 142.8 | 1.028 | 0.8    | 0.014  | 0.0943  | 0.0012  | 0.13672  | 596.5  | 7.8 | 580.7 | 7.1 | 638  | 44  | 580.7 | 7.1  | 2.648785 |
| 11USS04_81.FIN2 | 64    | 1.001 | 2.932  | 0.073  | 0.2295  | 0.0037  | 0.56181  | 1390   | 19  | 1332  | 19  | 1486 | 41  | 1486  | 41   | 10.36339 |
| 11USS04_82.FIN2 | 172   | 1.482 | 3.7    | 0.046  | 0.2684  | 0.0036  | 0.60512  | 1571.9 | 9.7 | 1535  | 19  | 1612 | 23  | 1612  | 23   | 4.776675 |
| 11USS04_84.FIN2 | 324   | 2.831 | 3.273  | 0.033  | 0.2557  | 0.0024  | 0.55172  | 1475.9 | 7.5 | 1467  | 12  | 1485 | 18  | 1485  | 18   | 1.212121 |
| 11USS04_86.FIN2 | 1286  | 4.03  | 3.511  | 0.059  | 0.2549  | 0.0043  | 0.82033  | 1530   | 14  | 1463  | 22  | 1610 | 19  | 1610  | 19   | 9.130435 |
| 11USS04_87.FIN2 | 443   | 1.94  | 0.929  | 0.011  | 0.10769 | 0.00078 | 0.059503 | 666.5  | 5.9 | 659.3 | 4.5 | 696  | 28  | 659.3 | 4.5  | 1.08027  |
| 11USS04_89.FIN2 | 193.6 | 2.982 | 1.737  | 0.019  | 0.1671  | 0.002   | 0.13099  | 1021.8 | 6.9 | 996   | 11  | 1081 | 25  | 996   | 11   | 2.524956 |
| 11USS04_90.FIN2 | 220   | 1.546 | 3.994  | 0.043  | 0.2843  | 0.0036  | 0.57243  | 1633.8 | 8.5 | 1612  | 18  | 1645 | 20  | 1645  | 20   | 2.006079 |
| 11USS04_91.FIN2 | 412   | 1.948 | 4.449  | 0.058  | 0.3009  | 0.0036  | 0.68798  | 1720   | 11  | 1695  | 18  | 1750 | 19  | 1750  | 19   | 3.142857 |
| 11USS04_92.FIN2 | 84.4  | 1.803 | 1.286  | 0.035  | 0.1284  | 0.0022  | 0.17012  | 838    | 16  | 779   | 13  | 1013 | 53  | 779   | 13   | 7.040573 |
| 11USS04_93.FIN2 | 125.8 | 1.116 | 0.833  | 0.016  | 0.0975  | 0.0015  | 0.25662  | 614.6  | 8.7 | 599.6 | 8.6 | 668  | 46  | 599.6 | 8.6  | 2.440612 |
| 11USS04_94.FIN2 | 162</ |       |        |        |         |         |          |        |     |       |     |      |     |       |      |          |



|                  |      |       |        |        |         |         |         |        |     |       |     |      |     |       |     |          |
|------------------|------|-------|--------|--------|---------|---------|---------|--------|-----|-------|-----|------|-----|-------|-----|----------|
| 11USS04_114.FIN2 | 288  | 1.369 | 3.399  | 0.035  | 0.2629  | 0.0028  | 0.53948 | 1503.5 | 8.1 | 1504  | 14  | 1511 | 21  | 1511  | 21  | 0.463269 |
| 11USS04_115.FIN2 | 809  | 8.15  | 3.231  | 0.038  | 0.2531  | 0.0029  | 0.54283 | 1463.8 | 9   | 1456  | 15  | 1489 | 20  | 1489  | 20  | 2.216253 |
| 11USS04_116.FIN2 | 686  | 2.343 | 0.1557 | 0.0085 | 0.01718 | 0.00049 | 0.12284 | 146.5  | 7.4 | 109.8 | 3.1 | 760  | 130 | 109.8 | 3.1 | 25.05119 |
| 11USS04_117.FIN2 | 86.6 | 2.11  | 1.998  | 0.039  | 0.19    | 0.0043  | 0.6455  | 1113   | 13  | 1123  | 23  | 1111 | 34  | 1123  | 23  | 0.898473 |
| 11USS04_118.FIN2 | 572  | 6.16  | 6.562  | 0.091  | 0.3529  | 0.0049  | 0.87035 | 2053   | 12  | 1954  | 24  | 2142 | 14  | 2142  | 14  | 8.776844 |
| 11USS04_119.FIN2 | 137  | 1.191 | 12.42  | 0.3    | 0.492   | 0.013   | 0.91463 | 2631   | 24  | 2574  | 56  | 2703 | 20  | 2703  | 20  | 4.772475 |
| 11USS04_120.FIN2 | 512  | 1.285 | 0.516  | 0.012  | 0.0681  | 0.002   | 0.67187 | 425.1  | 8.5 | 425   | 12  | 480  | 49  | 425   | 12  | 0.023524 |
| 11USS04_121.FIN2 | 473  | 2.15  | 3.448  | 0.037  | 0.2602  | 0.0036  | 0.78764 | 1515   | 8.4 | 1491  | 18  | 1541 | 17  | 1541  | 17  | 3.244646 |

|                 |       |        |        |        |         |         |         |        |     |        |     |        |     |        |     |           |
|-----------------|-------|--------|--------|--------|---------|---------|---------|--------|-----|--------|-----|--------|-----|--------|-----|-----------|
| 11USS05_1.FIN2  | 341   | 2.87   | 0.1731 | 0.0033 | 0.02564 | 0.00037 | 0.44856 | 162.4  | 2.8 | 163.2  | 2.3 | 195    | 24  | 163.2  | 2.3 | 0.492611  |
| 11USS05_2.FIN2  | 189.9 | 2.57   | 3.059  | 0.048  | 0.2422  | 0.0048  | 0.74469 | 1423   | 11  | 1397   | 25  | 1461   | 18  | 1461   | 18  | 4.380561  |
| 11USS05_3.FIN2  | 99    | 1.133  | 1.791  | 0.022  | 0.1749  | 0.0022  | 0.49563 | 1042.6 | 7.8 | 1039   | 12  | 1043   | 12  | 1039   | 12  | 0.345291  |
| 11USS05_4.FIN2  | 215.5 | 2.08   | 3.51   | 0.1    | 0.2449  | 0.007   | 0.83084 | 1532   | 22  | 1411   | 36  | 1714   | 19  | 1714   | 19  | 17.677795 |
| 11USS05_5.FIN2  | 97    | 0.755  | 1.846  | 0.017  | 0.178   | 0.0015  | 0.42199 | 1061.7 | 5.9 | 1055.8 | 8.3 | 1076   | 13  | 1055.8 | 8.3 | 0.555713  |
| 11USS05_6.FIN2  | 181   | 0.81   | 0.5056 | 0.0069 | 0.06684 | 0.00064 | 0.32824 | 415.9  | 4.5 | 417.1  | 3.9 | 423    | 16  | 417.1  | 3.9 | 0.288531  |
| 11USS05_7.FIN2  | 355   | 1.213  | 0.7017 | 0.0073 | 0.0867  | 0.00084 | 0.54783 | 539.6  | 4.3 | 536    | 5   | 560    | 11  | 536    | 5   | 0.667161  |
| 11USS05_8.FIN2  | 186.7 | 1.075  | 0.4425 | 0.0084 | 0.05895 | 0.00064 | 0.44891 | 371.7  | 5.9 | 369.2  | 3.9 | 403    | 28  | 369.2  | 3.9 | 0.672585  |
| 11USS05_9.FIN2  | 107   | 1.375  | 0.73   | 0.01   | 0.0904  | 0.00099 | 0.39085 | 556    | 6   | 557.8  | 5.9 | 563    | 17  | 557.8  | 5.9 | 0.323741  |
| 11USS05_10.FIN2 | 228   | 1.867  | 2.787  | 0.016  | 0.2344  | 0.0012  | 0.39174 | 1352.4 | 4.1 | 1357.5 | 6.2 | 1343.8 | 7   | 1343.8 | 7   | 1.019497  |
| 11USS05_11.FIN2 | 107   | 0.732  | 1.633  | 0.018  | 0.1634  | 0.0013  | 0.36139 | 982.5  | 7.1 | 975.8  | 7   | 1002   | 13  | 975.8  | 7   | 0.681934  |
| 11USS05_12.FIN2 | 240   | 0.922  | 1.905  | 0.013  | 0.1828  | 0.0011  | 0.45951 | 1082.7 | 4.5 | 1082.4 | 6   | 1085.5 | 8   | 1082.4 | 6   | 0.027709  |
| 11USS05_13.FIN2 | 286   | 0.92   | 3.849  | 0.04   | 0.2785  | 0.0028  | 0.86635 | 1602.5 | 8.4 | 1584   | 14  | 1634.3 | 5.6 | 1634.3 | 5.6 | 3.07777   |
| 11USS05_14.FIN2 | 58.4  | 1.513  | 3.036  | 0.038  | 0.2186  | 0.0032  | 0.44473 | 1417.8 | 9.9 | 1274   | 17  | 1633   | 17  | 1633   | 17  | 21.98408  |
| 11USS05_15.FIN2 | 35.4  | 1.228  | 1.351  | 0.044  | 0.1173  | 0.0019  | 0.26652 | 865    | 19  | 715    | 11  | 1256   | 49  | 715    | 11  | 17.34104  |
| 11USS05_16.FIN2 | 42.6  | 0.6267 | 14.15  | 0.11   | 0.5342  | 0.0041  | 0.53757 | 2759.2 | 7.5 | 2759   | 17  | 2768.3 | 7.8 | 2768.3 | 7.8 | 0.335946  |
| 11USS05_17.FIN2 | 247   | 0.838  | 15.97  | 0.21   | 0.4956  | 0.0072  | 0.72592 | 2874   | 12  | 2594   | 31  | 3078.6 | 8.2 | 3078.6 | 8.2 | 15.74092  |
| 11USS05_18.FIN2 | 211   | 2.01   | 0.5605 | 0.0095 | 0.07209 | 0.00083 | 0.57211 | 452.2  | 6.1 | 448.7  | 5   | 496    | 18  | 448.7  | 5   | 0.773994  |
| 11USS05_19.FIN2 | 78.7  | 1.154  | 3.88   | 0.067  | 0.2767  | 0.0045  | 0.66905 | 1609   | 14  | 1574   | 23  | 1652   | 15  | 1652   | 15  | 4.72155   |
| 11USS05_20.FIN2 | 70.2  | 0.921  | 5.279  | 0.083  | 0.3276  | 0.0045  | 0.63615 | 1864   | 13  | 1826   | 22  | 1912   | 17  | 1912   | 17  | 4.497908  |
| 11USS05_21.FIN2 | 518.1 | 2.996  | 1.984  | 0.026  | 0.1805  | 0.0022  | 0.79941 | 1109.6 | 9   | 1069   | 12  | 1206   | 10  | 1069   | 12  | 3.658976  |
| 11USS05_22.FIN2 | 264.5 | 1.518  | 1.713  | 0.029  | 0.1643  | 0.0027  | 0.80522 | 1015   | 11  | 980    | 15  | 1087   | 14  | 980    | 15  | 3.448276  |
| 11USS05_23.FIN2 | 68.76 | 1.078  | 2.851  | 0.04   | 0.2316  | 0.0025  | 0.56538 | 1368   | 11  | 1343   | 13  | 1413   | 17  | 1413   | 17  | 4.953999  |
| 11USS05_24.FIN2 | 82.8  | 0.943  | 1.756  | 0.03   | 0.1677  | 0.0024  | 0.91092 | 1028   | 11  | 999    | 13  | 1094   | 13  | 999    | 13  | 2.821012  |
| 11USS05_25.FIN2 | 132   | 1.146  | 0.1097 | 0.0072 | 0.01489 | 0.00027 | 0.30114 | 105.3  | 6.4 | 95.3   | 1.7 | 470    | 110 | 95.3   | 1.7 | 9.496676  |
| 11USS05_26.FIN2 | 50.5  | 1.898  | 1.788  | 0.024  | 0.1762  | 0.0021  | 0.33589 | 1040.5 | 8.7 | 1046   | 12  | 1043   | 18  | 1046   | 12  | 0.528592  |
| 11USS05_27.FIN2 | 160   | 1.373  | 0.1065 | 0.0035 | 0.01515 | 0.00031 | 0.32922 | 102.6  | 3.2 | 96.9   | 2   | 271    | 41  | 96.9   | 2   | 5.555556  |
| 11USS05_28.FIN2 | 245   | 1.236  | 2.009  | 0.022  | 0.1885  | 0.0019  | 0.47885 | 1120   | 6.9 | 1113   | 10  | 1133   | 10  | 1113   | 10  | 0.625     |
| 11USS05_29.FIN2 | 274   | 8.44   | 0.4849 | 0.0072 | 0.06297 | 0.00062 | 0.51621 | 401.2  | 4.9 | 393.7  | 3.8 | 450    | 16  | 393.7  | 3.8 | 1.869392  |
| 11USS05_30.FIN2 | 223   | 1.152  | 2.221  | 0.028  | 0.1983  | 0.0021  | 0.96115 | 1186.8 | 8.9 | 1166   | 11  | 1234.9 | 7.5 | 1166   | 11  | 1.752612  |
| 11USS05_31.FIN2 | 146   | 5.14   | 1.568  | 0.028  | 0.1557  | 0.0024  | 0.77628 | 956    | 11  | 933    | 13  | 1009   | 13  | 933    | 13  | 2.405858  |
| 11USS05_33.FIN2 | 45    | 1.06   | 1.532  | 0.043  | 0.1506  | 0.0019  | 0.3983  | 941    | 17  | 906    | 11  | 1029   | 34  | 906    | 11  | 3.719447  |
| 11USS05_34.FIN2 | 337   | 9.4    | 3.973  | 0.053  | 0.2846  | 0.0046  | 0.70774 | 1628   | 11  | 1614   | 23  | 1644   | 11  | 1644   | 11  | 1.824818  |
| 11USS05_36.FIN2 | 157   | 1.309  | 1.867  | 0.015  | 0.1792  | 0.0015  | 0.49294 | 1069.2 | 5.2 | 1062.7 | 8   | 1074.4 | 9.4 | 1062.7 | 8   | 0.607931  |
| 11USS05_37.FIN2 | 101   | 1.79   | 0.721  | 0.018  | 0.0892  | 0.0016  | 0.56715 | 552    | 10  | 550.6  | 9.2 | 556    | 26  | 550.6  | 9.2 | 0.253623  |
| 11USS05_38.FIN2 | 376   | 2.061  | 0.145  | 0.015  | 0.01495 | 0.00023 | 0.41552 | 136    | 13  | 95.7   | 1.5 | 820    | 180 | 95.7   | 1.5 | 29.63235  |
| 11USS05_39.FIN2 | 105.9 | 1.536  | 2.805  | 0.029  | 0.2297  | 0.002   | 0.4676  | 1356.4 | 7.6 | 1333   | 11  | 1403   | 11  | 1403   | 11  | 4.989309  |
| 11USS05_40.FIN2 | 115   | 2.44   | 3.45   | 0.033  | 0.2662  | 0.002   | 0.39594 | 1515.5 | 7.5 | 1521   | 10  | 1504   | 10  | 1504   | 10  | 1.130319  |
| 11USS05_41.FIN2 | 272   | 6.1    | 1.7    | 0.033  | 0.1609  | 0.0028  | 0.76825 | 1009   | 13  | 961    | 16  | 1107   | 23  | 961    | 16  | 4.757185  |
| 11USS05_42.FIN2 | 231   | 1.94   | 0.0748 | 0.0021 | 0.01167 | 0.00019 | 0.27756 | 73.2   | 2   | 74.8   | 1.2 | 175    | 29  | 74.8   | 1.2 | 2.185792  |
| 11USS05_43.FIN2 | 34.4  | 1.577  | 2.28   | 0.029  | 0.2009  | 0.0025  | 0.17757 | 1205.5 | 9.1 | 1180   | 14  | 1268   | 18  | 1180   | 14  | 2.115305  |
| 11USS05_46.FIN2 | 140.9 | 2.378  | 0.0799 | 0.0034 | 0.012   | 0.00024 | 0.15871 | 78     | 3.2 | 76.9   | 1.5 | 297    | 50  | 76.9   | 1.5 | 1.410256  |
| 11USS05_47.FIN2 | 135   | 1.88   | 4.139  | 0.049  | 0.2963  | 0.0033  | 0.47514 | 1661.1 | 9.6 | 1674   | 16  | 1642   | 15  | 1642   | 15  | 1.948843  |
| 11USS05_48.FIN2 | 48.9  | 1.048  | 2.526  | 0.052  | 0.1933  | 0.0041  | 0.73342 | 1281   | 15  | 1138   | 22  | 1541   | 17  | 1138   | 22  | 11.16315  |
| 11USS05_49.FIN2 | 268.4 | 3.32   | 0.4299 | 0.0092 | 0.05735 | 0.00083 | 0.45844 | 362.7  | 6.6 | 359.4  | 5.1 | 437    | 35  | 359.4  | 5.1 | 0.909843  |
| 11USS05_50.FIN2 | 150.8 | 1.631  | 3.827  | 0.033  | 0.2763  | 0.0021  | 0.68905 | 1598.1 | 7   | 1573   | 11  | 1626.4 | 7.1 | 1626.4 | 7.1 | 3.283325  |
| 11USS05_51.FIN2 | 126.6 | 1.778  | 3.889  | 0.043  | 0.2822  | 0.0036  | 0.41406 | 1610.8 | 9   | 1605   | 19  | 1623   | 12  | 1623   | 12  | 1.109057  |
| 11USS05_53.FIN2 | 259   | 1.852  | 3.123  | 0.06   | 0.2507  | 0.0046  | 0.97969 | 1436   | 16  | 1441   | 24  | 1430.1 | 8.9 | 1430.1 | 8.9 | 0.762184  |
| 11USS05_54.FIN2 | 406   | 0.904  | 0.0934 | 0.0021 | 0.01395 | 0.00016 | 0.11846 | 90.7   | 1.9 | 89.3   | 1   | 216    | 33  | 89.3   | 1   | 1.54355   |
| 11USS05_55.FIN2 | 212.9 | 10.7   | 0.4858 | 0.0073 | 0.06345 | 0.00078 | 0.25327 | 401.8  | 5   | 396.5  | 4.7 | 438    | 25  | 396.5  | 4.7 | 1.319064  |
| 11USS05_56.FIN2 | 102   | 0.47   | 1.802  | 0.023  | 0.1782  | 0.0019  | 0.2936  | 1045.5 | 8.3 | 1057   | 10  | 1018   | 17  | 1057   | 10  | 1.099952  |
| 11USS05_58.FIN2 | 157   | 1.322  | 1.95   | 0.028  | 0.1852  | 0.0023  | 0.83782 | 1099   | 10  | 1095   | 12  | 1095   | 12  | 1095   | 12  | 0.363967  |
| 11USS05_59.FIN2 | 104.4 | 1.283  | 5.287  | 0.046  | 0.3353  | 0.003   | 0.58371 | 1866.3 | 7.4 | 1866   | 15  | 1874.2 | 7.7 | 1874.2 | 7.7 | 0.43752   |
| 11USS05_60.FIN2 | 61.1  | 1.065  | 0.415  | 0.013  | 0.05556 | 0.00086 | 0.1987  | 351.7  | 9.5 | 348.5  | 5.2 | 392    | 45  | 348.5  | 5.2 | 0.909866  |
| 11USS05_61.FIN2 | 1650  | 2.95   | 0.0824 | 0.0066 | 0.0115  | 0.001   | 0.93631 | 80     | 6.2 | 73.6   | 6.4 | 332    | 44  | 73.6   | 6.4 | 8         |
| 11USS05_62.FIN2 | 395   | 2.369  | 4.731  | 0.049  | 0.316   | 0.0034  | 0.97208 | 1772   | 8.7 | 1770   | 17  | 1772.5 | 6.8 | 1772.5 | 6.8 | 0.141044  |
| 11USS05_63.FIN2 | 130   | 1.476  | 4.839  | 0.041  | 0.323   | 0.0031  | 0.68874 | 1793.4 | 6.8 | 1804   | 15  | 1781.8 | 6.6 | 1781.8 | 6.6 | 1.245931  |
| 11USS05_64.FIN2 | 620   | 1.25   | 0.422  | 0.025  | 0.0533  | 0.0034  | 0.98285 | 360    | 18  | 334    | 21  | 529    | 16  | 334    | 21  | 7.222222  |
| 11USS05_65.FIN2 | 118   | 1.847  | 5.641  | 0.051  | 0.346   | 0.0026  | 0.50024 | 1923.8 | 7.8 | 1915   | 12  | 1930   | 8.1 | 1930   | 8.1 | 0.777202  |
| 11USS05_66.FIN2 | 254   | 1.915  | 12.52  | 0.12   | 0.4815  | 0.0043  | 0.71302 | 2644   | 8.8 | 2533   | 18  | 2720.8 | 9.4 | 2720.8 | 9.4 | 6.902382  |
| 11USS05_67.FIN2 | 198   | 3.58   | 3.787  | 0.057  | 0.2612  | 0.0039  | 0.83909 | 1593   | 12  | 1495   | 20  | 1725.9 | 9.5 | 1725.9 | 9.5 | 13.37853  |
| 11USS05_68.FIN2 | 224.7 | 2.9    | 1.785  | 0.046  | 0.1704  | 0.0026  | 0.90251 | 1039   | 17  | 1014   | 14  | 1094   | 25  | 1014   | 14  | 2.40616   |
| 11USS05_69.FIN2 | 47.6  | 1.359  | 1.774  | 0.025  | 0.1748  | 0.0018  | 0.35154 | 1036.8 | 9.3 | 1038   | 10  | 1033   | 18  | 1038   | 10  | 0.115741  |
| 11USS05_70.FIN2 | 63.3  | 1.432  | 4.533  | 0.068  | 0.2976  | 0.0047  | 0.71493 | 1736   | 13  | 1684   | 23  | 1816   | 13  | 1816   | 13  | 7.268722  |
| 11USS05_71.FIN2 | 58.7  | 1.692  | 1.764  | 0.021  | 0.1732  | 0.002   | 0.24104 | 1031.6 | 7.8 | 1030   | 11  | 1036   | 15  | 1030   | 11  | 0.155099  |
| 11USS05_72.FIN2 | 120.8 | 1.63   | 4.28   | 0.038  | 0.3018  | 0.0025  | 0.42185 | 1689   | 7.3 | 1700   | 12  | 1672.5 | 8.8 | 1672.5 | 8.8 | 1.644245  |
| 11USS05_73.FIN2 | 203   | 1.286  | 0.1011 | 0.0028 | 0.01494 | 0.00024 | 0.21081 | 97.7   | 2.6 | 95.6   | 1.5 | 215    | 33  | 95.6   | 1.5 | 2.149437  |
| 11USS05_74.FIN2 | 93.9  | 1.258  | 14.55  | 0.22   |         |         |         |        |     |        |     |        |     |        |     |           |

|                  |       |        |        |        |         |         |          |        |     |        |     |        |     |        |     |          |
|------------------|-------|--------|--------|--------|---------|---------|----------|--------|-----|--------|-----|--------|-----|--------|-----|----------|
| 11USS05_87.FIN2  | 61.7  | 1.873  | 2.695  | 0.055  | 0.2301  | 0.0036  | 0.34154  | 1325   | 15  | 1335   | 19  | 1323   | 18  | 1323   | 18  | 0.907029 |
| 11USS05_88.FIN2  | 39.6  | 1.49   | 2.704  | 0.04   | 0.222   | 0.0032  | 0.3681   | 1328   | 11  | 1292   | 17  | 1371   | 20  | 1371   | 20  | 5.762217 |
| 11USS05_89.FIN2  | 1050  | 1.9    | 0.0888 | 0.004  | 0.01169 | 0.00093 | 0.77856  | 86.3   | 3.8 | 74.8   | 5.9 | 470    | 120 | 74.8   | 5.9 | 13.32561 |
| 11USS05_90.FIN2  | 145.8 | 0.532  | 0.632  | 0.013  | 0.0782  | 0.0014  | 0.69698  | 498.9  | 7.9 | 485.3  | 8.6 | 582    | 16  | 485.3  | 8.6 | 2.725997 |
| 11USS05_91.FIN2  | 288   | 0.933  | 4.405  | 0.054  | 0.3017  | 0.004   | 0.82746  | 1712   | 10  | 1699   | 20  | 1736   | 11  | 1736   | 11  | 2.131336 |
| 11USS05_92.FIN2  | 71.1  | 0.813  | 5.407  | 0.075  | 0.3303  | 0.0042  | 0.72761  | 1887   | 11  | 1839   | 20  | 1938.5 | 8.3 | 1938.5 | 8.3 | 5.132835 |
| 11USS05_93.FIN2  | 224.9 | 1.61   | 0.5266 | 0.0073 | 0.06838 | 0.00065 | 0.28505  | 429.3  | 4.9 | 426.4  | 3.9 | 452    | 16  | 426.4  | 3.9 | 0.675518 |
| 11USS05_94.FIN2  | 417   | 2.29   | 2.075  | 0.016  | 0.1927  | 0.0015  | 0.51583  | 1140.2 | 5.2 | 1136   | 7.9 | 1146.5 | 8.8 | 1136   | 7.9 | 0.368356 |
| 11USS05_95.FIN2  | 189   | 2.18   | 3.977  | 0.029  | 0.2844  | 0.0018  | 0.45978  | 1629.2 | 5.9 | 1613.6 | 9.2 | 1644.5 | 7.6 | 1644.5 | 7.6 | 1.878991 |
| 11USS05_96.FIN2  | 402   | 1.698  | 0.0949 | 0.0023 | 0.01382 | 0.00035 | 0.54454  | 92     | 2.1 | 88.5   | 2.2 | 212    | 33  | 88.5   | 2.2 | 3.804348 |
| 11USS05_97.FIN2  | 81    | 1.123  | 0.85   | 0.041  | 0.0916  | 0.002   | 0.68729  | 620    | 21  | 565    | 12  | 817    | 62  | 565    | 12  | 8.870968 |
| 11USS05_98.FIN2  | 74.6  | 1.54   | 0.339  | 0.011  | 0.04617 | 0.00092 | 0.095885 | 296.1  | 8.2 | 290.9  | 5.7 | 420    | 46  | 290.9  | 5.7 | 1.756163 |
| 11USS05_99.FIN2  | 120.2 | 1.306  | 1.703  | 0.017  | 0.1673  | 0.0012  | 0.17008  | 1009.2 | 6.4 | 997    | 6.9 | 1027   | 12  | 997    | 6.9 | 1.208878 |
| 11USS05_100.FIN2 | 180   | 1.82   | 3.291  | 0.045  | 0.2562  | 0.0036  | 0.96448  | 1478   | 11  | 1470   | 18  | 1489   | 11  | 1489   | 11  | 1.276024 |
| 11USS05_101.FIN2 | 235   | 11.89  | 0.847  | 0.011  | 0.09886 | 0.00099 | 0.58215  | 622.7  | 6.3 | 607.7  | 5.8 | 691    | 13  | 607.7  | 5.8 | 2.408865 |
| 11USS05_102.FIN2 | 664   | 2.15   | 0.0899 | 0.0021 | 0.01352 | 0.00025 | 0.55966  | 87.4   | 2   | 86.5   | 1.6 | 200    | 29  | 86.5   | 1.6 | 1.029748 |
| 11USS05_103.FIN2 | 287   | 1.101  | 0.0899 | 0.0031 | 0.0136  | 0.00025 | 0.23895  | 87.3   | 2.9 | 87.1   | 1.6 | 229    | 43  | 87.1   | 1.6 | 0.229095 |
| 11USS05_104.FIN2 | 86.7  | 0.813  | 3.869  | 0.049  | 0.2813  | 0.0029  | 0.4489   | 1607   | 10  | 1598   | 15  | 1609   | 13  | 1609   | 13  | 0.683654 |
| 11USS05_105.FIN2 | 281   | 1.6    | 2.585  | 0.028  | 0.2176  | 0.0025  | 0.73136  | 1296.7 | 7.8 | 1269   | 13  | 1337.2 | 9.9 | 1337.2 | 9.9 | 5.100209 |
| 11USS05_106.FIN2 | 92.3  | 1.275  | 2.393  | 0.02   | 0.2087  | 0.0018  | 0.53892  | 1240.2 | 5.9 | 1221.6 | 9.4 | 1271   | 10  | 1271   | 10  | 3.886703 |
| 11USS05_107.FIN2 | 114   | 1.45   | 1.785  | 0.054  | 0.1736  | 0.0045  | 0.96717  | 1036   | 22  | 1031   | 25  | 1037   | 22  | 1031   | 25  | 0.482625 |
| 11USS05_108.FIN2 | 54.6  | 2.149  | 2.388  | 0.034  | 0.2139  | 0.0026  | 0.2087   | 1238   | 10  | 1249   | 14  | 1217   | 19  | 1217   | 19  | 2.629417 |
| 11USS05_109.FIN2 | 291   | 6.08   | 10.83  | 0.15   | 0.4354  | 0.005   | 0.84315  | 2507   | 13  | 2329   | 22  | 2652   | 13  | 2652   | 13  | 12.17949 |
| 11USS05_110.FIN2 | 157.8 | 1.78   | 2.861  | 0.035  | 0.2351  | 0.0026  | 0.78473  | 1370.9 | 9.4 | 1361   | 13  | 1384   | 11  | 1384   | 11  | 1.66185  |
| 11USS05_111.FIN2 | 72.2  | 1.0087 | 4.179  | 0.049  | 0.2991  | 0.0026  | 0.49984  | 1669   | 9.7 | 1687   | 13  | 1653   | 11  | 1653   | 11  | 2.056866 |
| 11USS05_112.FIN2 | 443   | 1.83   | 0.236  | 0.017  | 0.0327  | 0.0023  | 0.95859  | 215    | 14  | 207    | 15  | 277    | 18  | 207    | 15  | 3.72093  |
| 11USS05_114.FIN2 | 198   | 1.64   | 0.6134 | 0.0096 | 0.07745 | 0.00066 | 0.18709  | 485.4  | 6   | 480.9  | 3.9 | 521    | 30  | 480.9  | 3.9 | 0.92707  |
| 11USS05_116.FIN2 | 17    | 1.041  | 4.75   | 0.11   | 0.3061  | 0.0058  | 0.46566  | 1780   | 19  | 1721   | 28  | 1850   | 27  | 1850   | 27  | 6.972973 |
| 11USS05_117.FIN2 | 47.9  | 0.4707 | 2.576  | 0.037  | 0.2172  | 0.0026  | 0.41876  | 1293   | 11  | 1268   | 13  | 1338   | 20  | 1338   | 20  | 5.231689 |
| 11USS05_118.FIN2 | 115   | 1.655  | 2.194  | 0.033  | 0.1994  | 0.0024  | 0.13555  | 1178   | 11  | 1172   | 13  | 1212   | 29  | 1172   | 13  | 0.509338 |

|                 |       |       |        |        |         |         |          |        |     |        |     |      |     |       |     |          |
|-----------------|-------|-------|--------|--------|---------|---------|----------|--------|-----|--------|-----|------|-----|-------|-----|----------|
| 11USS06_1.FIN2  | 86.7  | 1.229 | 4.439  | 0.066  | 0.3073  | 0.0037  | 0.38195  | 1718   | 12  | 1727   | 18  | 1716 | 27  | 1716  | 27  | 0.641026 |
| 11USS06_2.FIN2  | 414   | 76    | 1.741  | 0.049  | 0.1726  | 0.0036  | 0.67101  | 1023   | 18  | 1026   | 20  | 1013 | 54  | 1026  | 20  | 0.293255 |
| 11USS06_2.FIN2  | 186   | 3.43  | 2.44   | 0.051  | 0.2175  | 0.0049  | 0.45357  | 1254   | 15  | 1274   | 24  | 1218 | 40  | 1218  | 40  | 4.597701 |
| 11USS06_2.FIN2  | 66.2  | 1.602 | 3.026  | 0.091  | 0.2512  | 0.0056  | 0.024747 | 1413   | 23  | 1444   | 29  | 1383 | 65  | 1383  | 65  | 4.410701 |
| 11USS06_3.FIN2  | 106.9 | 0.571 | 13.99  | 0.15   | 0.5297  | 0.0072  | 0.85338  | 2751   | 11  | 2739   | 30  | 2750 | 17  | 2750  | 17  | 0.4      |
| 11USS06_4.FIN2  | 269   | 2.812 | 3.86   | 0.089  | 0.2846  | 0.0058  | 0.88498  | 1604   | 18  | 1614   | 29  | 1604 | 21  | 1604  | 21  | 0.623441 |
| 11USS06_6.FIN2  | 249   | 2.8   | 13.11  | 0.15   | 0.5155  | 0.0052  | 0.78087  | 2688   | 11  | 2679   | 22  | 2700 | 12  | 2700  | 12  | 0.777778 |
| 11USS06_7.FIN2  | 3570  | 4.06  | 0.3502 | 0.0089 | 0.0345  | 0.0017  | 0.21567  | 304.8  | 6.7 | 219    | 11  | 1000 | 110 | 219   | 11  | 28.14961 |
| 11USS06_7.FIN2  | 385   | 0.96  | 0.361  | 0.011  | 0.04714 | 0.00071 | 0.59376  | 312.8  | 7.9 | 296.9  | 4.4 | 405  | 56  | 296.9 | 4.4 | 5.08312  |
| 11USS06_8.FIN2  | 448   | 1.81  | 4.021  | 0.079  | 0.2729  | 0.0054  | 0.82788  | 1638   | 16  | 1555   | 27  | 1742 | 25  | 1742  | 25  | 10.73479 |
| 11USS06_8.FIN2  | 321   | 1.559 | 4.743  | 0.058  | 0.3246  | 0.0034  | 0.58673  | 1774   | 10  | 1812   | 16  | 1731 | 20  | 1731  | 20  | 4.679376 |
| 11USS06_9.FIN2  | 490   | 2.209 | 4.519  | 0.075  | 0.3098  | 0.0051  | 0.90759  | 1733   | 14  | 1739   | 25  | 1732 | 14  | 1732  | 14  | 0.404157 |
| 11USS06_10.FIN2 | 689   | 7.5   | 4.246  | 0.048  | 0.2972  | 0.0028  | 0.80276  | 1683.8 | 9   | 1677   | 14  | 1706 | 14  | 1706  | 14  | 1.699883 |
| 11USS06_11.FIN2 | 64.5  | 1.617 | 1.758  | 0.042  | 0.1701  | 0.0029  | 0.31527  | 1030   | 16  | 1012   | 16  | 1074 | 48  | 1012  | 16  | 1.747573 |
| 11USS06_13.FIN2 | 271   | 2.196 | 4.235  | 0.038  | 0.3018  | 0.0028  | 0.70341  | 1680.4 | 7.3 | 1700   | 14  | 1648 | 13  | 1648  | 13  | 3.15534  |
| 11USS06_14.FIN2 | 117   | 2.66  | 4.02   | 0.062  | 0.2881  | 0.0035  | 0.64576  | 1640   | 13  | 1632   | 17  | 1645 | 26  | 1645  | 26  | 0.790274 |
| 11USS06_15.FIN2 | 308   | 3.36  | 4.611  | 0.031  | 0.3143  | 0.0029  | 0.68907  | 1750.9 | 5.7 | 1761   | 14  | 1727 | 14  | 1727  | 14  | 1.968732 |
| 11USS06_16.FIN2 | 117.8 | 1.464 | 4.91   | 0.087  | 0.3201  | 0.0048  | 0.75378  | 1803   | 15  | 1790   | 23  | 1826 | 21  | 1826  | 21  | 1.971522 |
| 11USS06_17.FIN2 | 306   | 1.341 | 6.089  | 0.056  | 0.3576  | 0.004   | 0.57919  | 1988.4 | 8.1 | 1974   | 20  | 2001 | 17  | 2001  | 17  | 1.349325 |
| 11USS06_18.FIN2 | 161   | 2.73  | 3.414  | 0.041  | 0.2646  | 0.0029  | 0.36879  | 1507   | 9.4 | 1513   | 15  | 1499 | 25  | 1499  | 25  | 0.933956 |
| 11USS06_19.FIN2 | 392   | 3.05  | 4.549  | 0.046  | 0.3071  | 0.0035  | 0.71891  | 1739.4 | 8.4 | 1726   | 17  | 1753 | 14  | 1753  | 14  | 1.540217 |
| 11USS06_20.FIN2 | 409   | 2.22  | 0.4206 | 0.007  | 0.05621 | 0.00053 | 0.16609  | 356.2  | 5   | 352.5  | 3.2 | 370  | 39  | 352.5 | 3.2 | 1.038742 |
| 11USS06_21.FIN2 | 274.9 | 0.996 | 0.863  | 0.011  | 0.10207 | 0.00082 | 0.43297  | 631.4  | 5.9 | 626.5  | 4.8 | 638  | 26  | 626.5 | 4.8 | 0.776053 |
| 11USS06_22.FIN2 | 242   | 1.85  | 2.827  | 0.032  | 0.2196  | 0.0029  | 0.74225  | 1363.1 | 8.7 | 1279   | 15  | 1502 | 17  | 1502  | 17  | 14.84687 |
| 11USS06_23.FIN2 | 350   | 2.275 | 3.325  | 0.022  | 0.2626  | 0.0015  | 0.40533  | 1488.2 | 5.2 | 1503.2 | 7.5 | 1471 | 13  | 1471  | 13  | 2.188987 |
| 11USS06_24.FIN2 | 132.5 | 1.333 | 2.06   | 0.027  | 0.1964  | 0.0021  | 0.47961  | 1137   | 9.3 | 1156   | 11  | 1102 | 25  | 1156  | 11  | 1.671064 |
| 11USS06_25.FIN2 | 182.1 | 12.41 | 1.892  | 0.037  | 0.1716  | 0.0025  | 0.54002  | 1078   | 13  | 1020   | 14  | 1189 | 32  | 1020  | 14  | 5.380334 |
| 11USS06_26.FIN2 | 107.6 | 0.921 | 2.761  | 0.042  | 0.2245  | 0.0027  | 0.092322 | 1347   | 11  | 1305   | 14  | 1413 | 34  | 1413  | 34  | 7.643312 |
| 11USS06_27.FIN2 | 816   | 24.6  | 4      | 0.11   | 0.2771  | 0.0058  | 0.92505  | 1632   | 24  | 1576   | 29  | 1705 | 25  | 1705  | 25  | 7.655982 |
| 11USS06_28.FIN2 | 425   | 8.2   | 3.49   | 0.1    | 0.256   | 0.0043  | 0.91801  | 1523   | 23  | 1469   | 22  | 1608 | 25  | 1608  | 25  | 8.644279 |
| 11USS06_30.FIN2 | 242   | 1.159 | 4.094  | 0.046  | 0.2927  | 0.0031  | 0.6781   | 1652.2 | 9.2 | 1655   | 15  | 1662 | 17  | 1662  | 17  | 0.421179 |
| 11USS06_31.FIN2 | 88.8  | 1.418 | 3.773  | 0.052  | 0.2759  | 0.0042  | 0.47156  | 1586   | 11  | 1570   | 21  | 1618 | 28  | 1618  | 28  | 2.966625 |
| 11USS06_32.FIN2 | 193   | 4.82  | 14.87  | 0.16   | 0.5378  | 0.0059  | 0.71544  | 2806   | 10  | 2773   | 25  | 2821 | 14  | 2821  | 14  | 1.701524 |
| 11USS06_33.FIN2 | 231.9 | 0.941 | 3.867  | 0.039  | 0.2756  | 0.0023  | 0.53211  | 1606.2 | 8.2 | 1571   | 12  | 1652 | 17  | 1652  | 17  | 4.903148 |
| 11USS06_34.FIN2 | 63.8  | 1.794 | 7.45   | 0.36   | 0.3651  | 0.0054  | 0.21853  | 2154   | 42  | 2006   | 25  | 2301 | 63  | 2301  | 63  | 12.82051 |
| 11USS06_35.FIN2 | 116   | 1.802 | 1.541  | 0.048  | 0.1501  | 0.0038  | 0.51572  | 944    | 19  | 901    | 21  | 1039 | 57  | 901   | 21  | 4.555085 |
| 11USS06_36.FIN2 | 268.8 | 80    | 4.497  | 0.044  | 0.3101  | 0.0025  | 0.57569  | 1731.7 | 8.4 | 1742   | 12  | 1710 | 16  | 1710  | 16  | 1.871345 |
| 11USS06_37.FIN2 | 75.7  | 1.99  | 3.24   | 0.15   | 0.2443  | 0.0092  | 0.81555  | 1458   | 37  | 1406   | 48  | 1547 | 53  | 1547  | 53  | 9.114415 |
| 11USS06_38.FIN2 | 302   | 2.37  | 2.997  | 0.058  | 0.2349  | 0.0047  | 0.74309  | 1408   | 14  | 1359   | 25  | 1462 | 26  | 1462  | 26  | 7.045144 |
| 11USS06_39.FIN2 | 44.9  | 1.508 | 2.279  | 0.058  | 0.2034  | 0.0035  | 0.41294  | 1203   | 18  | 1193   | 19  | 1213 | 52  | 1193  | 19  | 0.831255 |
| 11USS06_40.FIN2 | 367.9 | 1.638 | 0.558  | 0.018  | 0.06679 | 0.00076 | 0.14884  | 449    | 12  | 416.8  | 4.6 | 603  | 64  | 416.8 | 4.6 | 7.171492 |
| 11USS06_41.FIN2 | 207   | 3.08  | 0.545  | 0.01   | 0.06798 | 0.00075 | 0.31888  | 441.3  | 6.7 | 424    | 4.5 | 525  | 41  | 424   | 4.5 | 3.920236 |
| 11USS06_42.FIN2 | 145   | 1.546 | 8.47   | 0.11   | 0.4263  | 0.0067  | 0.79307  | 2285   | 13  | 2288   | 30  | 2271 | 21  | 2271  | 21  | 0.748569 |
| 11USS06_43.FIN2 | 1775  | 3.54  | 0.1048 | 0.0019 | 0.0155  | 0.00021 | 0.36044  | 101.1  | 1.8 | 99.2   | 1.3 | 143  | 44  | 99.2  | 1.3 | 1.879327 |
| 11USS06_44.FIN2 | 248.8 | 5.35  | 2.016  | 0.034  | 0.1872  | 0.003   | 0.49998  | 1122   | 12  | 1106   | 16  | 1117 | 34  | 1106  | 16  | 1.426025 |
| 11USS06_46.FIN2 | 870   | 7.11  | 2.797  | 0.097  | 0.224   | 0.0083  | 0.72696  | 1353   | 26  | 1302   | 44  | 1426 | 51  | 1426  | 51  | 8.695652 |
| 11USS06_46.FIN2 | 378   | 3.29  | 3.39   | 0.035  | 0.2608  | 0.0028  | 0.6397   | 1502.8 | 8.4 | 1494   | 14  | 1507 | 17  | 1507  | 17  | 0.862641 |
| 11USS06_47.FIN2 | 434   | 9.29  | 0.7334 | 0.0077 | 0.09066 | 0.0009  | 0.35502  | 558.3  | 4.5 | 559.4  | 5.3 | 574  | 26  | 559.4 | 5.3 | 0.197027 |
| 11USS06_48.FIN2 | 122.2 | 6.24  | 1.947  | 0.03   | 0.1837  | 0.0023  | 0.38468  | 1098   | 11  | 1087   | 12  | 1112 | 32  | 1087  | 12  | 1.001821 |
| 11USS06_49.FIN2 | 198.9 | 3.97  | 5.115  | 0.044  | 0.3301  | 0.0035  | 0.67089  | 1838.2 | 7.2 | 1840   | 17  | 1839 | 16  | 1839  | 16  | 0.054377 |
| 11USS06_50.FIN2 | 433   | 1.817 | 0.689  | 0.01   | 0.0863  | 0.0011  | 0.4768   | 532.4  | 5.9 | 533.3  | 6.4 | 557  | 30  | 533.3 | 6.4 | 0.169046 |
| 11USS06_51.FIN2 | 334.7 | 1.855 | 3.107  | 0.031  | 0.253   | 0.0029  | 0.49924  | 1434.2 | 7.7 | 1454   | 15  | 1408 | 22  | 1408  | 22  | 3.267045 |
| 11USS06_52.FIN2 | 78    | 1.138 | 2.107  | 0.057  | 0.194   | 0.0034  | 0.27388  | 1149   | 19  | 1143   | 19  | 1155 | 59  | 1143  | 19  | 0.522193 |
| 11USS06_53.FIN2 | 161   | 2.3   | 2.282  | 0.043  | 0.2042  | 0.0042  | 0.76803  | 1205   | 13  | 1201   | 24  | 1196 | 32  | 1196  | 24  | 0.33195  |
| 11USS06_54.FIN2 | 145.5 | 1.848 | 3      | 0.05   | 0.2321  | 0.003   | 0.56535  | 1410   | 13  | 1345   | 16  | 1501 | 24  | 1501  | 24  | 10.39307 |
| 11USS06_56.FIN2 | 256   | 0.938 | 1.85   | 0.033  | 0.1749  | 0.0023  | 0.85056  | 1062   | 12  | 1039   | 13  | 1120 | 23  | 1039  | 13  | 2.165725 |
| 11USS06_57.FIN2 | 399   | 3.5   | 2.008  | 0.065  | 0.1683  | 0.0056  | 0.7096   | 1116   | 22  | 1002   | 31  | 1385 | 46  | 1002  | 31  | 0.21505  |
| 11USS06_57.FIN2 | 59.6  | 2.169 | 2.875  | 0.065  | 0.2358  | 0.0046  | 0.56331  | 1374   | 17  | 1369   | 25  | 1380 | 39  | 1380  | 39  | 0.797105 |

|                  |       |       |        |        |         |         |          |        |     |        |     |      |     |        |     |          |
|------------------|-------|-------|--------|--------|---------|---------|----------|--------|-----|--------|-----|------|-----|--------|-----|----------|
| 11USS06_58.FIN2  | 550   | 1.284 | 0.1098 | 0.0024 | 0.01648 | 0.00022 | 0.25448  | 105.8  | 2.2 | 105.4  | 1.4 | 138  | 53  | 105.4  | 1.4 | 0.378072 |
| 11USS06_59.FIN2  | 1422  | 14.1  | 0.389  | 0.025  | 0.0436  | 0.0025  | 0.28133  | 333    | 19  | 275    | 16  | 830  | 150 | 275    | 16  | 17.41742 |
| 11USS06_59.FIN2  | 550   | 20.9  | 0.52   | 0.012  | 0.0666  | 0.0015  | 0.56219  | 424.5  | 8.2 | 415.6  | 9.1 | 485  | 47  | 415.6  | 9.1 | 2.096584 |
| 11USS06_60.FIN2  | 132.1 | 0.937 | 11.28  | 0.11   | 0.4619  | 0.0052  | 0.46384  | 2545.6 | 8.9 | 2447   | 23  | 2613 | 18  | 2613   | 18  | 6.352851 |
| 11USS06_61.FIN2  | 424   | 30.6  | 0.536  | 0.017  | 0.07    | 0.0018  | 0.58624  | 436    | 11  | 436    | 11  | 461  | 63  | 436    | 11  | 0        |
| 11USS06_61.FIN2  | 252   | 5.31  | 1.447  | 0.053  | 0.139   | 0.0048  | 0.85256  | 907    | 22  | 839    | 27  | 1039 | 33  | 839    | 27  | 7.497244 |
| 11USS06_62.FIN2  | 94.7  | 1.331 | 2.497  | 0.052  | 0.2094  | 0.0029  | 0.33387  | 1270   | 15  | 1226   | 15  | 1316 | 41  | 1316   | 41  | 6.838906 |
| 11USS06_63.FIN2  | 258   | 1.49  | 5.513  | 0.062  | 0.3366  | 0.0036  | 0.66803  | 1903   | 10  | 1873   | 18  | 1916 | 19  | 1916   | 19  | 2.244259 |
| 11USS06_65.FIN2  | 214   | 1.182 | 2.693  | 0.046  | 0.2236  | 0.0039  | 0.58367  | 1326   | 13  | 1300   | 21  | 1356 | 34  | 1356   | 34  | 4.129794 |
| 11USS06_67.FIN2  | 222   | 2.47  | 5.515  | 0.047  | 0.3419  | 0.0031  | 0.54012  | 1902.4 | 7.3 | 1895   | 15  | 1895 | 16  | 1895   | 16  | 0        |
| 11USS06_68.FIN2  | 278   | 1.047 | 0.0782 | 0.0026 | 0.01193 | 0.00029 | 0.11104  | 76.4   | 2.4 | 76.4   | 1.8 | 103  | 78  | 76.4   | 1.8 | 0        |
| 11USS06_69.FIN2  | 25.9  | 0.912 | 5.022  | 0.081  | 0.3265  | 0.0047  | 0.33923  | 1823   | 13  | 1821   | 23  | 1830 | 34  | 1830   | 34  | 0.491803 |
| 11USS06_70.FIN2  | 92    | 2.801 | 4.425  | 0.059  | 0.3034  | 0.003   | 0.25542  | 1718   | 11  | 1708   | 15  | 1738 | 24  | 1738   | 24  | 1.726122 |
| 11USS06_71.FIN2  | 333   | 1.763 | 3.439  | 0.047  | 0.2662  | 0.003   | 0.68082  | 1513   | 11  | 1521   | 16  | 1496 | 19  | 1496   | 19  | 1.671123 |
| 11USS06_72.FIN2  | 182   | 0.787 | 2.073  | 0.022  | 0.1906  | 0.002   | 0.24759  | 1139.5 | 7.2 | 1124   | 11  | 1152 | 25  | 1124   | 11  | 1.360246 |
| 11USS06_74.FIN2  | 358   | 6.7   | 10.132 | 0.083  | 0.4631  | 0.0048  | 0.058858 | 2448   | 7.2 | 2453   | 21  | 2442 | 20  | 2442   | 20  | 0.45045  |
| 11USS06_76.FIN2  | 218   | 1.318 | 4.207  | 0.045  | 0.2979  | 0.0037  | 0.55932  | 1674.7 | 8.7 | 1680   | 18  | 1663 | 20  | 1663   | 20  | 1.022249 |
| 11USS06_78.FIN2  | 60.6  | 0.996 | 0.569  | 0.019  | 0.0696  | 0.0017  | 0.053005 | 458    | 12  | 435    | 11  | 569  | 85  | 435    | 11  | 5.021834 |
| 11USS06_79.FIN2  | 91    | 1.036 | 1.697  | 0.03   | 0.1668  | 0.0019  | 0.27089  | 1006   | 11  | 996    | 11  | 1061 | 35  | 996    | 11  | 0.994036 |
| 11USS06_80.FIN2  | 644   | 1.091 | 1.552  | 0.055  | 0.1502  | 0.0045  | 0.77674  | 949    | 22  | 902    | 25  | 1073 | 38  | 902    | 25  | 4.952582 |
| 11USS06_81.FIN2  | 164   | 1.915 | 2.858  | 0.038  | 0.2286  | 0.0027  | 0.61316  | 1370   | 10  | 1327   | 14  | 1441 | 24  | 1441   | 24  | 7.911173 |
| 11USS06_82.FIN2  | 72.9  | 0.842 | 3.253  | 0.048  | 0.2473  | 0.0034  | 0.39743  | 1471   | 11  | 1424   | 18  | 1525 | 27  | 1525   | 27  | 6.622951 |
| 11USS06_83.FIN2  | 321   | 1.956 | 4.905  | 0.067  | 0.3241  | 0.0051  | 0.66536  | 1803   | 12  | 1809   | 25  | 1809 | 23  | 1809   | 23  | 0        |
| 11USS06_83.FIN2  | 150.9 | 1.221 | 5.101  | 0.067  | 0.3412  | 0.0035  | 0.46842  | 1836   | 11  | 1892   | 17  | 1785 | 19  | 1785   | 19  | 5.994398 |
| 11USS06_85.FIN2  | 422.9 | 16.6  | 2.23   | 0.062  | 0.1932  | 0.0033  | 0.38421  | 1188   | 20  | 1138   | 18  | 1280 | 39  | 1138   | 18  | 4.208754 |
| 11USS06_86.FIN2  | 417   | 0.878 | 0.853  | 0.012  | 0.0999  | 0.0013  | 0.44017  | 627    | 6.2 | 613.9  | 7.7 | 702  | 30  | 613.9  | 7.7 | 2.089314 |
| 11USS06_87.FIN2  | 339   | 5.97  | 3.975  | 0.041  | 0.2888  | 0.0027  | 0.62082  | 1629.7 | 8.5 | 1635   | 14  | 1637 | 14  | 1637   | 14  | 0.122175 |
| 11USS06_88.FIN2  | 312   | 1.564 | 4.096  | 0.04   | 0.296   | 0.0035  | 0.84178  | 1653.2 | 7.9 | 1671   | 17  | 1641 | 15  | 1641   | 15  | 1.828154 |
| 11USS06_89.FIN2  | 1890  | 1.162 | 0.1029 | 0.0017 | 0.01529 | 0.00017 | 0.3307   | 99.4   | 1.6 | 97.8   | 1.1 | 115  | 35  | 97.8   | 1.1 | 1.609658 |
| 11USS06_90.FIN2  | 322   | 1.719 | 4.416  | 0.029  | 0.3046  | 0.0022  | 0.40422  | 1715.1 | 5.5 | 1714   | 11  | 1724 | 13  | 1724   | 13  | 0.580046 |
| 11USS06_91.FIN2  | 303   | 6.1   | 0.5086 | 0.008  | 0.0664  | 0.00085 | 0.28227  | 417.2  | 5.4 | 414.4  | 5.1 | 442  | 35  | 414.4  | 5.1 | 0.671141 |
| 11USS06_92.FIN2  | 241   | 4.64  | 2.162  | 0.055  | 0.1956  | 0.0036  | 0.53099  | 1168   | 18  | 1151   | 19  | 1217 | 44  | 1151   | 19  | 1.455479 |
| 11USS06_92.FIN2  | 106.7 | 1.753 | 2.642  | 0.058  | 0.2217  | 0.0033  | 0.018051 | 1311   | 16  | 1291   | 17  | 1371 | 51  | 1371   | 51  | 5.835157 |
| 11USS06_93.FIN2  | 156.1 | 1.244 | 3.831  | 0.043  | 0.2721  | 0.0041  | 0.58094  | 1601   | 8.6 | 1551   | 21  | 1667 | 24  | 1667   | 24  | 6.958608 |
| 11USS06_94.FIN2  | 166.7 | 2.514 | 2.024  | 0.031  | 0.1891  | 0.0022  | 0.49224  | 1124   | 11  | 1117   | 12  | 1146 | 27  | 1117   | 12  | 0.622776 |
| 11USS06_95.FIN2  | 475   | 1.626 | 2.09   | 0.028  | 0.1965  | 0.0026  | 0.5425   | 1145.1 | 9.3 | 1156   | 14  | 1150 | 27  | 1156   | 14  | 0.951882 |
| 11USS06_96.FIN2  | 302   | 2.371 | 2.923  | 0.03   | 0.2397  | 0.0023  | 0.74146  | 1387.4 | 7.7 | 1385   | 12  | 1397 | 15  | 1397   | 15  | 0.858984 |
| 11USS06_97.FIN2  | 12.23 | 0.642 | 2.01   | 0.092  | 0.1795  | 0.0062  | 0.47029  | 1109   | 31  | 1062   | 34  | 1220 | 73  | 1062   | 34  | 4.238052 |
| 11USS06_98.FIN2  | 310   | 1.71  | 0.0794 | 0.0031 | 0.01178 | 0.00022 | 0.075252 | 77.5   | 2.9 | 75.5   | 1.4 | 180  | 83  | 75.5   | 1.4 | 2.580645 |
| 11USS06_99.FIN2  | 10.26 | -416  | 0.777  | 0.073  | 0.0801  | 0.004   | 0.24117  | 568    | 40  | 496    | 24  | 770  | 180 | 496    | 24  | 12.67606 |
| 11USS06_100.FIN2 | 571   | 2.73  | 0.5097 | 0.0071 | 0.06724 | 0.00076 | 0.071062 | 418    | 4.8 | 419.4  | 4.6 | 414  | 32  | 419.4  | 4.6 | 0.334928 |
| 11USS06_101.FIN2 | 696   | 2.52  | 0.501  | 0.017  | 0.0599  | 0.0011  | 0.34368  | 412    | 11  | 375.2  | 6.4 | 637  | 76  | 375.2  | 6.4 | 8.932039 |
| 11USS06_101.FIN2 | 303   | 1.119 | 0.673  | 0.015  | 0.0698  | 0.0013  | 0.54886  | 523.7  | 8.7 | 434.9  | 7.6 | 930  | 39  | 434.9  | 7.6 | 16.95627 |
| 11USS06_102.FIN2 | 72.3  | 0.875 | 26.58  | 0.37   | 0.6395  | 0.0097  | 0.96202  | 3367   | 14  | 3186   | 38  | 3470 | 16  | 3470   | 16  | 8.184438 |
| 11USS06_103.FIN2 | 113.1 | 2.039 | 0.41   | 0.034  | 0.0446  | 0.0019  | 0.061996 | 344    | 23  | 281    | 12  | 695  | 93  | 281    | 12  | 18.31395 |
| 11USS06_104.FIN2 | 59.2  | 1.79  | 3.593  | 0.067  | 0.2632  | 0.0061  | 0.46098  | 1548   | 15  | 1505   | 31  | 1606 | 44  | 1606   | 44  | 6.288917 |
| 11USS06_105.FIN2 | 251   | 1.154 | 2.408  | 0.026  | 0.2115  | 0.0021  | 0.3804   | 1245.5 | 7.9 | 1237   | 11  | 1252 | 22  | 1252   | 22  | 1.198083 |
| 11USS06_106.FIN2 | 67.7  | 1.899 | 3.982  | 0.046  | 0.2827  | 0.0033  | 0.26712  | 1629.8 | 9.3 | 1605   | 16  | 1634 | 29  | 1634   | 29  | 1.774786 |
| 11USS06_107.FIN2 | 698   | 1.89  | 2.477  | 0.019  | 0.2108  | 0.0016  | 0.70605  | 1265.1 | 5.5 | 1233.2 | 8.5 | 1319 | 11  | 1319   | 11  | 6.504928 |
| 11USS06_108.FIN2 | 152   | 1.256 | 0.475  | 0.016  | 0.0609  | 0.0013  | 0.44492  | 394    | 11  | 380.9  | 7.8 | 476  | 65  | 380.9  | 7.8 | 3.324873 |
| 11USS06_109.FIN2 | 201.6 | 1.358 | 0.539  | 0.013  | 0.069   | 0.0012  | 0.3511   | 437.1  | 8.4 | 430.3  | 7.1 | 474  | 52  | 430.3  | 7.1 | 1.555708 |
| 11USS06_110.FIN2 | 112.3 | 1.798 | 4.299  | 0.046  | 0.3009  | 0.0029  | 0.47046  | 1692.7 | 8.8 | 1695   | 14  | 1695 | 17  | 1695   | 17  | 0        |
| 11USS06_111.FIN2 | 63.1  | 1.464 | 2.051  | 0.04   | 0.1938  | 0.0029  | 0.25478  | 1140   | 14  | 1141   | 16  | 1125 | 44  | 1141   | 16  | 0.087719 |
| 11USS06_113.FIN2 | 722   | 1.96  | 0.54   | 0.01   | 0.06629 | 0.00094 | 0.43091  | 438.1  | 6.8 | 413.8  | 5.7 | 565  | 40  | 413.8  | 5.7 | 5.546679 |
| 11USS06_113.FIN2 | 368   | 1.487 | 0.742  | 0.024  | 0.0896  | 0.0016  | 0.70376  | 569    | 15  | 553.1  | 9.5 | 607  | 55  | 553.1  | 9.5 | 2.794376 |
| 11USS06_114.FIN2 | 72.9  | 1.124 | 2.745  | 0.053  | 0.2231  | 0.0031  | 0.33653  | 1343   | 14  | 1298   | 16  | 1421 | 38  | 1421   | 38  | 8.655876 |
| 11USS06_115.FIN2 | 186   | 1.634 | 1.522  | 0.019  | 0.1565  | 0.0014  | 0.42571  | 939.7  | 7.6 | 937.1  | 8.1 | 962  | 24  | 937.1  | 8.1 | 0.276684 |
| 11USS06_116.FIN2 | 177.7 | 1.773 | 2.882  | 0.037  | 0.2356  | 0.0024  | 0.50935  | 1378.2 | 9.4 | 1364   | 13  | 1396 | 22  | 1396   | 22  | 2.292264 |
| 11USS06_117.FIN2 | 442   | 66.9  | 1.826  | 0.023  | 0.1772  | 0.0019  | 0.60213  | 1056   | 8   | 1052   | 11  | 1054 | 22  | 1052   | 11  | 0.378788 |
| 11USS06_118.FIN2 | 154.9 | 1.347 | 4.049  | 0.054  | 0.2888  | 0.0045  | 0.77276  | 1645   | 11  | 1635   | 22  | 1653 | 24  | 1653   | 24  | 1.088929 |
| 11USS06_119.FIN2 | 348   | 1.343 | 3.727  | 0.039  | 0.2631  | 0.0022  | 0.67057  | 1576.6 | 8.4 | 1505   | 11  | 1672 | 14  | 1672   | 14  | 9.988038 |
| 11USS06_120.FIN2 | 507   | 1.258 | 0.6073 | 0.007  | 0.07742 | 0.00055 | 0.17345  | 482.2  | 4.5 | 480.7  | 3.3 | 485  | 26  | 480.7  | 3.3 | 0.311074 |
|                  |       |       |        |        |         |         |          |        |     |        |     |      |     |        |     |          |
| 11USS07_1.FIN2   | 63.4  | 1.247 | 3.032  | 0.041  | 0.2429  | 0.0027  | 0.75345  | 1415   | 10  | 1401   | 14  | 1442 | 12  | 1442   | 12  | 2.843273 |
| 11USS07_2.FIN2   | 56.4  | 1.796 | 2.023  | 0.027  | 0.1902  | 0.0026  | 0.41335  | 1123.6 | 9.4 | 1122   | 14  | 1136 | 17  | 1122   | 14  | 0.142399 |
| 11USS07_3.FIN2   | 197   | 1.631 | 2.445  | 0.024  | 0.2123  | 0.0018  | 0.45881  | 1255.6 | 7.1 | 1240.8 | 9.3 | 1287 | 15  | 1287   | 15  | 3.589744 |
| 11USS07_4.FIN2   | 31.4  | 1.725 | 1.707  | 0.031  | 0.1593  | 0.0019  | 0.36992  | 1010   | 12  | 953    | 10  | 1161 | 20  | 953    | 10  | 5.643564 |
| 11USS07_5.FIN2   | 132   | 1.374 | 6.72   | 0.14   | 0.3763  | 0.0049  | 0.83109  | 2075   | 18  | 2058   | 23  | 2099 | 15  | 2099   | 15  | 1.953311 |
| 11USS07_6.FIN2   | 145   | 0.939 | 2.134  | 0.033  | 0.1939  | 0.0018  | 0.45269  | 1159   | 11  | 1142.2 | 9.9 | 1201 | 24  | 1142.2 | 9.9 | 1.449525 |
| 11USS07_7.FIN2   | 142.8 | 1.434 | 2.121  | 0.02   | 0.196   | 0.0019  | 0.57552  | 1156.1 | 6.7 | 1154   | 10  | 1171 | 10  | 1154   | 10  | 0.181645 |
| 11USS07_8.FIN2   | 76    | 0.751 | 1.961  | 0.027  | 0.183   | 0.0022  | 0.61079  | 1101.5 | 9.1 | 1083   | 12  | 1151 | 13  | 1083   | 12  | 1.679528 |
| 11USS07_9.FIN2   | 231.9 | 1.368 | 5.204  | 0.052  | 0.3267  | 0.003   | 0.66191  | 1852.8 | 8.6 | 1822   | 14  | 1885 | 10  | 1885   | 10  | 3.342175 |
| 11USS07_10.FIN2  | 274   | 2.371 |        |        |         |         |          |        |     |        |     |      |     |        |     |          |

|                  |       |        |        |        |         |         |          |        |     |        |     |        |     |        |     |          |
|------------------|-------|--------|--------|--------|---------|---------|----------|--------|-----|--------|-----|--------|-----|--------|-----|----------|
| 11USS07_27.FIN2  | 401.7 | 1.453  | 1.6    | 0.017  | 0.1489  | 0.0019  | 0.70092  | 969.8  | 6.7 | 895    | 10  | 1156   | 15  | 895    | 10  | 7.712931 |
| 11USS07_28.FIN2  | 97.3  | 0.6739 | 12.313 | 0.075  | 0.4971  | 0.0035  | 0.70251  | 2628.3 | 5.7 | 2601   | 15  | 2652.7 | 4.6 | 2652.7 | 4.6 | 1.948958 |
| 11USS07_29.FIN2  | 159   | 12.66  | 2.234  | 0.022  | 0.1954  | 0.0019  | 0.5745   | 1191.4 | 6.9 | 1150   | 10  | 1262   | 13  | 1150   | 10  | 3.474903 |
| 11USS07_30.FIN2  | 63.9  | 1.02   | 1.864  | 0.036  | 0.1736  | 0.0032  | 0.4493   | 1067   | 13  | 1032   | 17  | 1136   | 23  | 1032   | 17  | 3.280225 |
| 11USS07_31.FIN2  | 176   | 1.552  | 5.228  | 0.06   | 0.3311  | 0.0041  | 0.76333  | 1858.7 | 9.7 | 1843   | 20  | 1865.4 | 7   | 1865.4 | 7   | 1.200815 |
| 11USS07_32.FIN2  | 85    | 1.254  | 2.393  | 0.027  | 0.213   | 0.0023  | 0.55607  | 1240   | 8   | 1245   | 12  | 1225   | 15  | 1225   | 15  | 1.632653 |
| 11USS07_33.FIN2  | 354.6 | 1.802  | 4.533  | 0.034  | 0.3043  | 0.0026  | 0.7267   | 1737.4 | 6.1 | 1712   | 13  | 1771.7 | 7.5 | 1771.7 | 7.5 | 3.369645 |
| 11USS07_34.FIN2  | 139.1 | 2.09   | 3.219  | 0.023  | 0.2544  | 0.0021  | 0.6245   | 1461.5 | 5.5 | 1461   | 11  | 1466   | 10  | 1466   | 10  | 0.341064 |
| 11USS07_35.FIN2  | 167   | 2.07   | 1.928  | 0.018  | 0.1845  | 0.0021  | 0.55142  | 1091.6 | 6.6 | 1091   | 11  | 1093   | 10  | 1091   | 11  | 0.054965 |
| 11USS07_36.FIN2  | 55.4  | 1.908  | 3.114  | 0.045  | 0.2475  | 0.0039  | 0.53379  | 1435   | 11  | 1425   | 20  | 1452   | 17  | 1452   | 17  | 1.859504 |
| 11USS07_37.FIN2  | 253   | 1.677  | 4.842  | 0.077  | 0.3118  | 0.0049  | 0.84004  | 1791   | 13  | 1749   | 24  | 1820   | 15  | 1820   | 15  | 3.901099 |
| 11USS07_38.FIN2  | 148   | 1.328  | 0.2895 | 0.0073 | 0.03836 | 0.00077 | 0.70829  | 257.8  | 5.7 | 242.7  | 4.8 | 435    | 43  | 242.7  | 4.8 | 5.857254 |
| 11USS07_39.FIN2  | 57.7  | 0.574  | 4.636  | 0.072  | 0.2953  | 0.005   | 0.81166  | 1754   | 13  | 1670   | 25  | 1858   | 10  | 1858   | 10  | 10.11841 |
| 11USS07_40.FIN2  | 222   | 1.076  | 4.962  | 0.036  | 0.3211  | 0.0026  | 0.74484  | 1812.6 | 6.1 | 1795   | 13  | 1826.8 | 6.2 | 1826.8 | 6.2 | 1.740749 |
| 11USS07_41.FIN2  | 147   | 0.914  | 2.015  | 0.018  | 0.1896  | 0.0013  | 0.50804  | 1120.8 | 6.1 | 1119.2 | 7.2 | 1129.6 | 9.3 | 1119.2 | 7.2 | 0.142755 |
| 11USS07_42.FIN2  | 80.8  | 0.8558 | 2.935  | 0.034  | 0.2352  | 0.0021  | 0.4532   | 1390.5 | 8.7 | 1361   | 11  | 1432.6 | 9.8 | 1432.6 | 9.8 | 4.997906 |
| 11USS07_43.FIN2  | 76    | 1.34   | 5.111  | 0.05   | 0.3294  | 0.0032  | 0.64779  | 1839.4 | 8.3 | 1835   | 15  | 1843.8 | 8.7 | 1843.8 | 8.7 | 0.477275 |
| 11USS07_45.FIN2  | 159.7 | 1.076  | 0.0817 | 0.0027 | 0.01147 | 0.00019 | 0.041042 | 79.6   | 2.5 | 73.5   | 1.2 | 328    | 45  | 73.5   | 1.2 | 7.663317 |
| 11USS07_46.FIN2  | 367   | 29.1   | 0.476  | 0.011  | 0.0624  | 0.0014  | 0.93829  | 394.7  | 8   | 390    | 8.7 | 442    | 15  | 390    | 8.7 | 1.190778 |
| 11USS07_47.FIN2  | 85.1  | 0.982  | 2.689  | 0.032  | 0.2262  | 0.0029  | 0.63738  | 1324.6 | 8.9 | 1314   | 15  | 1342   | 12  | 1342   | 12  | 2.086438 |
| 11USS07_48.FIN2  | 110.6 | 1.043  | 2.045  | 0.021  | 0.1913  | 0.002   | 0.61563  | 1130.2 | 6.9 | 1128   | 11  | 1144   | 10  | 1128   | 11  | 0.194656 |
| 11USS07_49.FIN2  | 268   | 0.93   | 1.915  | 0.04   | 0.1809  | 0.0029  | 0.9084   | 1085   | 14  | 1071   | 16  | 1119   | 12  | 1071   | 16  | 1.290323 |
| 11USS07_50.FIN2  | 120.7 | 1.062  | 7.84   | 0.05   | 0.4047  | 0.0027  | 0.6855   | 2212.5 | 5.8 | 2191   | 12  | 2233.3 | 5.5 | 2233.3 | 5.5 | 1.894058 |
| 11USS07_51.FIN2  | 193   | 0.961  | 0.0773 | 0.0021 | 0.01202 | 0.0002  | 0.12484  | 75.6   | 2   | 77     | 1.3 | 175    | 34  | 77     | 1.3 | 1.851852 |
| 11USS07_52.FIN2  | 427   | 216    | 0.4499 | 0.008  | 0.0592  | 0.001   | 0.84067  | 376.9  | 5.7 | 371    | 6.3 | 412    | 17  | 371    | 6.3 | 1.565402 |
| 11USS07_53.FIN2  | 26.3  | 0.778  | 1.914  | 0.035  | 0.1805  | 0.0026  | 0.17966  | 1085   | 12  | 1069   | 14  | 1118   | 23  | 1069   | 14  | 1.474654 |
| 11USS07_54.FIN2  | 32.3  | 0.975  | 3.039  | 0.053  | 0.2331  | 0.0033  | 0.48875  | 1417   | 13  | 1350   | 17  | 1516   | 21  | 1516   | 21  | 10.94987 |
| 11USS07_55.FIN2  | 118   | 2.432  | 1.689  | 0.017  | 0.1677  | 0.0018  | 0.53261  | 1005.6 | 6.8 | 999    | 10  | 1010   | 12  | 999    | 10  | 0.656325 |
| 11USS07_56.FIN2  | 201   | 2.634  | 1.888  | 0.02   | 0.1766  | 0.0018  | 0.51596  | 1076.3 | 6.9 | 1049.5 | 9.9 | 1122   | 10  | 1049.5 | 9.9 | 2.490012 |
| 11USS07_58.FIN2  | 232   | 1.064  | 3.045  | 0.038  | 0.2403  | 0.0032  | 0.74518  | 1419.3 | 9.4 | 1388   | 16  | 1459   | 13  | 1459   | 13  | 4.866347 |
| 11USS07_60.FIN2  | 40.5  | 1.395  | 2.206  | 0.039  | 0.1995  | 0.0026  | 0.45123  | 1183   | 12  | 1172   | 14  | 1211   | 20  | 1172   | 14  | 0.929839 |
| 11USS07_61.FIN2  | 337   | 1.463  | 10.33  | 0.11   | 0.4681  | 0.0062  | 0.78678  | 2465   | 10  | 2478   | 26  | 2453.9 | 9.9 | 2453.9 | 9.9 | 0.98211  |
| 11USS07_62.FIN2  | 425   | 1.071  | 2.238  | 0.032  | 0.1598  | 0.0028  | 0.87674  | 1193.8 | 9.8 | 955    | 15  | 1658   | 12  | 955    | 15  | 20.00335 |
| 11USS07_63.FIN2  | 176.8 | 2.103  | 0.8668 | 0.006  | 0.05242 | 0.00056 | 0.20721  | 331.9  | 4.4 | 329.3  | 3.4 | 368    | 20  | 329.3  | 3.4 | 0.783368 |
| 11USS07_64.FIN2  | 238   | 1.929  | 1.84   | 0.017  | 0.1778  | 0.0013  | 0.84069  | 1059.4 | 6.1 | 1055   | 7.3 | 1073.9 | 9.4 | 1055   | 7.3 | 0.415329 |
| 11USS07_65.FIN2  | 86.6  | 0.977  | 1.864  | 0.021  | 0.1778  | 0.0021  | 0.6357   | 1067.9 | 7.5 | 1055   | 11  | 1091   | 12  | 1055   | 11  | 1.207978 |
| 11USS07_66.FIN2  | 99    | 0.928  | 5.182  | 0.057  | 0.3329  | 0.0044  | 0.69289  | 1848.8 | 9.5 | 1852   | 21  | 1842   | 12  | 1842   | 12  | 0.542888 |
| 11USS07_67.FIN2  | 352   | 1.28   | 4.029  | 0.072  | 0.2707  | 0.0054  | 0.92841  | 1640   | 15  | 1543   | 27  | 1767.1 | 7.8 | 1767.1 | 7.8 | 12.6818  |
| 11USS07_68.FIN2  | 253.4 | 1.318  | 1.809  | 0.024  | 0.1786  | 0.0023  | 0.76206  | 1048.3 | 8.6 | 1059   | 12  | 1031.2 | 9.6 | 1059   | 12  | 1.0207   |
| 11USS07_69.FIN2  | 155.8 | 2.441  | 1.901  | 0.018  | 0.1806  | 0.0017  | 0.37672  | 1082.4 | 6.2 | 1069.9 | 9.2 | 1106   | 12  | 1069.9 | 9.2 | 1.154841 |
| 11USS07_70.FIN2  | 160.4 | 0.4594 | 2.05   | 0.024  | 0.1912  | 0.0032  | 0.60511  | 1132   | 8.1 | 1130   | 18  | 1154   | 16  | 1130   | 18  | 0.176678 |
| 11USS07_71.FIN2  | 46.6  | 0.763  | 3.196  | 0.041  | 0.245   | 0.0032  | 0.42752  | 1457.6 | 9.3 | 1412   | 17  | 1518   | 16  | 1518   | 16  | 6.982872 |
| 11USS07_73.FIN2  | 39.5  | 2.112  | 4.034  | 0.046  | 0.2801  | 0.0031  | 0.40645  | 1643.3 | 9.8 | 1592   | 16  | 1713   | 17  | 1713   | 17  | 7.063631 |
| 11USS07_74.FIN2  | 144.1 | 0.938  | 1.603  | 0.014  | 0.1593  | 0.0013  | 0.39991  | 970.9  | 5.4 | 952.9  | 7.1 | 1019   | 12  | 952.9  | 7.1 | 1.85395  |
| 11USS07_75.FIN2  | 324   | 2.61   | 4.399  | 0.072  | 0.3034  | 0.0046  | 0.89366  | 1712   | 14  | 1707   | 23  | 1710.2 | 8.5 | 1710.2 | 8.5 | 0.187113 |
| 11USS07_76.FIN2  | 63.4  | 1.418  | 2      | 0.049  | 0.1721  | 0.0037  | 0.70351  | 1115   | 16  | 1023   | 20  | 1283   | 26  | 1023   | 20  | 8.251121 |
| 11USS07_77.FIN2  | 342   | 1.133  | 2.858  | 0.025  | 0.2286  | 0.0019  | 0.81384  | 1370.7 | 6.7 | 1326.9 | 9.8 | 1444.3 | 8.4 | 1444.3 | 8.4 | 8.128505 |
| 11USS07_78.FIN2  | 21.2  | 1.453  | 1.542  | 0.044  | 0.1453  | 0.0035  | 0.56488  | 945    | 17  | 874    | 20  | 1132   | 28  | 874    | 20  | 7.513228 |
| 11USS07_79.FIN2  | 83.7  | 1.059  | 5.128  | 0.034  | 0.334   | 0.0022  | 0.55589  | 1841.2 | 5.8 | 1857   | 11  | 1830.3 | 6.2 | 1830.3 | 6.2 | 1.458777 |
| 11USS07_80.FIN2  | 62.2  | 0.658  | 4.575  | 0.045  | 0.298   | 0.0029  | 0.57033  | 1744.2 | 8.2 | 1681   | 14  | 1814.9 | 8.7 | 1814.9 | 8.7 | 7.377817 |
| 11USS07_81.FIN2  | 72.7  | 1.84   | 3.306  | 0.053  | 0.2595  | 0.0031  | 0.74297  | 1482   | 13  | 1487   | 16  | 1490   | 14  | 1490   | 14  | 0.201342 |
| 11USS07_82.FIN2  | 18.6  | 1.512  | 2.352  | 0.078  | 0.188   | 0.0049  | 0.88967  | 1222   | 25  | 1109   | 27  | 1471   | 20  | 1109   | 27  | 2.947136 |
| 11USS07_83.FIN2  | 139   | 1.197  | 4.476  | 0.039  | 0.3032  | 0.0027  | 0.59329  | 1727   | 7.4 | 1707   | 14  | 1745.1 | 6   | 1745.1 | 6   | 2.183256 |
| 11USS07_84.FIN2  | 84.3  | 1.417  | 1.772  | 0.018  | 0.1758  | 0.0016  | 0.29762  | 1034.7 | 6.5 | 1043.7 | 8.7 | 1014   | 16  | 1043.7 | 8.7 | 0.869817 |
| 11USS07_85.FIN2  | 183.3 | 1.945  | 1.898  | 0.016  | 0.1815  | 0.0014  | 0.50708  | 1080.3 | 5.5 | 1075.3 | 7.8 | 1092   | 10  | 1075.3 | 7.8 | 0.462834 |
| 11USS07_87.FIN2  | 36.5  | 0.866  | 6.41   | 0.066  | 0.3641  | 0.0034  | 0.47932  | 2032.8 | 9   | 2001   | 16  | 2071   | 10  | 2071   | 10  | 3.38001  |
| 11USS07_88.FIN2  | 152   | 1.114  | 0.5061 | 0.0075 | 0.0661  | 0.001   | 0.53847  | 415.6  | 5   | 412.5  | 6.2 | 431    | 22  | 412.5  | 6.2 | 0.74591  |
| 11USS07_89.FIN2  | 126   | 1.42   | 16.61  | 0.23   | 0.5608  | 0.0081  | 0.83244  | 2911   | 13  | 2868   | 33  | 2930.2 | 8.2 | 2930.2 | 8.2 | 2.122722 |
| 11USS07_92.FIN2  | 61.5  | 0.613  | 3.992  | 0.038  | 0.2879  | 0.002   | 0.38508  | 1633.1 | 8   | 1634   | 10  | 1643.6 | 9.7 | 1643.6 | 9.7 | 0.584084 |
| 11USS07_93.FIN2  | 566   | 1.421  | 0.1051 | 0.0027 | 0.01492 | 0.00029 | 0.68445  | 101.4  | 2.5 | 95.5   | 1.8 | 264    | 29  | 95.5   | 1.8 | 5.81854  |
| 11USS07_94.FIN2  | 41.5  | 0.626  | 2.67   | 0.042  | 0.2184  | 0.0033  | 0.89432  | 1322   | 13  | 1269   | 19  | 1426   | 15  | 1426   | 15  | 11.00982 |
| 11USS07_95.FIN2  | 236   | 1.007  | 0.1    | 0.0079 | 0.01178 | 0.00032 | 0.64207  | 96.2   | 7.3 | 75.5   | 2   | 690    | 110 | 75.5   | 2   | 21.51767 |
| 11USS07_96.FIN2  | 116.6 | 1.24   | 4.232  | 0.073  | 0.2919  | 0.0059  | 0.7568   | 1678   | 14  | 1650   | 29  | 1710   | 17  | 1710   | 17  | 3.508772 |
| 11USS07_97.FIN2  | 107.7 | 0.803  | 2.868  | 0.036  | 0.2351  | 0.003   | 0.54341  | 1374   | 9.6 | 1362   | 16  | 1394   | 15  | 1394   | 15  | 2.295552 |
| 11USS07_98.FIN2  | 51.2  | 1.057  | 6.833  | 0.059  | 0.3853  | 0.0038  | 0.67501  | 2089.4 | 7.6 | 2101   | 18  | 2076.6 | 8.8 | 2076.6 | 8.8 | 1.174998 |
| 11USS07_99.FIN2  | 185   | 0.876  | 0.0771 | 0.0019 | 0.01168 | 0.00019 | 0.053049 | 75.4   | 1.8 | 74.9   | 1.2 | 172    | 24  | 74.9   | 1.2 | 0.66313  |
| 11USS07_100.FIN2 | 32.47 | 0.844  | 5.54   | 0.055  | 0.3417  | 0.004   | 0.4125   | 1907.2 | 8.7 | 1895   | 19  | 1929.8 | 8.9 | 1929.8 | 8.9 | 1.803296 |
| 11USS07_101.FIN2 | 245   | 1.947  | 4.622  | 0.047  | 0.3166  | 0.0039  | 0.72763  | 1753.7 | 8.6 | 1773   | 19  | 1735.5 | 9.7 | 1735.5 | 9.7 | 2.160761 |
| 11USS07_102.FIN2 | 191   | 0.926  | 0.0775 | 0.0026 | 0.01177 | 0.00023 | 0.26918  | 75.8   | 2.4 | 75.4   | 1.5 | 208    | 37  | 75.4   | 1.5 | 0.527704 |
| 11USS07_103.FIN2 | 70.3  | 1.331  | 1.592  | 0.019  | 0.1613  | 0.0017  | 0.41945  | 966.4  | 7.3 | 964    | 9.2 | 977    | 16  | 964    | 9.2 | 0.248344 |
| 11USS07_104.FIN2 | 163   | 1.357  | 1.911  | 0.022  | 0.1831  | 0.002   | 0.6488   | 1085.5 | 7.7 | 1084   | 11  | 1094.2 | 9.6 | 1084   | 11  |          |

## Green River

| Sample Name:       |         |        |         |          |         | 207/235  |          |        |          | 206/238  |          |          |          | 206/207  |          |          |          | Best age |          | % Discordance* |
|--------------------|---------|--------|---------|----------|---------|----------|----------|--------|----------|----------|----------|----------|----------|----------|----------|----------|----------|----------|----------|----------------|
| Grain #            | [U] ppm | U/Th   | 207/235 | 2σ error | 206/238 | 2σ error | RHO      | Age Ma | 2σ error | Age (Ma) | 2σ error | (Ma)     | 2σ error |                |
| Bluecastle_1.FIN2  | 49.7    | 1.011  | 0.0743  | 0.0067   | 0.01098 | 0.00042  | 0.034559 | 72.5   | 6.3      | 70.4     | 2.7      | 160      | 170      | 70.4     | 2.7      | 2.896552 |          |          |          |                |
| Bluecastle_2.FIN2  | 368     | 7.19   | 2.18    | 0.023    | 0.1902  | 0.0023   | 0.56206  | 1175.1 | 7        | 1122     | 13       | 1274     | 22       | 1122     | 13       | 4.518764 |          |          |          |                |
| Bluecastle_3.FIN2  | 225     | 0.749  | 2.987   | 0.026    | 0.2392  | 0.0021   | 0.23072  | 1404   | 6.7      | 1382     | 11       | 1436     | 15       | 1436     | 15       | 3.760446 |          |          |          |                |
| Bluecastle_4.FIN2  | 200     | 1.9    | 0.0803  | 0.0062   | 0.01143 | 0.00031  | 0.048406 | 78.3   | 5.8      | 73.3     | 2        | 210      | 160      | 73.3     | 2        | 6.385696 |          |          |          |                |
| Bluecastle_5.FIN2  | 67.8    | 1.302  | 1.744   | 0.029    | 0.1697  | 0.0025   | 0.21018  | 1026   | 11       | 1010     | 14       | 1057     | 40       | 1010     | 14       | 1.559454 |          |          |          |                |
| Bluecastle_6.FIN2  | 130     | 2.379  | 1.74    | 0.024    | 0.1721  | 0.0015   | 0.40149  | 1022.7 | 8.7      | 1023.5   | 8.2      | 1039     | 25       | 1023.5   | 8.2      | 0.078224 |          |          |          |                |
| Bluecastle_7.FIN2  | 196     | 4.41   | 4.055   | 0.061    | 0.287   | 0.0042   | 0.6009   | 1645   | 12       | 1626     | 21       | 1685     | 23       | 1685     | 23       | 3.501484 |          |          |          |                |
| Bluecastle_8.FIN2  | 51      | 0.951  | 0.154   | 0.015    | 0.0212  | 0.00067  | 0.071546 | 144    | 13       | 135.2    | 4.2      | 270      | 190      | 135.2    | 4.2      | 6.111111 |          |          |          |                |
| Bluecastle_9.FIN2  | 127.9   | 1.689  | 2.544   | 0.028    | 0.2089  | 0.002    | 0.56135  | 1285.3 | 7.9      | 1223     | 11       | 1401     | 19       | 1401     | 19       | 12.70521 |          |          |          |                |
| Bluecastle_10.FIN2 | 60.5    | 1.138  | 12.27   | 0.12     | 0.4767  | 0.0054   | 0.63147  | 2624.3 | 9.1      | 2512     | 23       | 2723     | 16       | 2723     | 16       | 7.748806 |          |          |          |                |
| Bluecastle_11.FIN2 | 206     | 0.8149 | 0.3878  | 0.0093   | 0.0524  | 0.001    | 0.38068  | 332.6  | 6.8      | 329.2    | 6.2      | 380      | 65       | 329.2    | 6.2      | 1.022249 |          |          |          |                |
| Bluecastle_12.FIN2 | 39.7    | 1.448  | 2.241   | 0.05     | 0.186   | 0.0031   | 0.47443  | 1194   | 15       | 1099     | 17       | 1395     | 39       | 1099     | 17       | 7.956449 |          |          |          |                |
| Bluecastle_14.FIN2 | 192.6   | 1.73   | 1.912   | 0.038    | 0.1704  | 0.0035   | 0.87748  | 1084   | 13       | 1014     | 19       | 1245     | 19       | 1014     | 19       | 6.457565 |          |          |          |                |
| Bluecastle_15.FIN2 | 338     | 1.567  | 0.0717  | 0.0024   | 0.0106  | 0.00023  | 0.092776 | 70.3   | 2.2      | 68       | 1.5      | 139      | 77       | 68       | 1.5      | 3.271693 |          |          |          |                |
| Bluecastle_16.FIN2 | 82.3    | 0.3897 | 1.037   | 0.018    | 0.03468 | 0.00076  | 0.43487  | 723    | 8.8      | 219.8    | 4.8      | 2954     | 35       | DISC     | DISC     | 69.59889 |          |          |          |                |
| Bluecastle_17.FIN2 | 45.2    | 0.841  | 0.0773  | 0.0063   | 0.01144 | 0.00043  | 0.25248  | 76.3   | 6.2      | 73.3     | 2.7      | 180      | 170      | 73.3     | 2.7      | 3.931848 |          |          |          |                |
| Bluecastle_18.FIN2 | 94.5    | 1.291  | 2.887   | 0.042    | 0.2356  | 0.0033   | 0.33506  | 1378   | 11       | 1364     | 17       | 1427     | 35       | 1427     | 35       | 4.414856 |          |          |          |                |
| Bluecastle_19.FIN2 | 95      | 1.92   | 1.77    | 0.033    | 0.1727  | 0.0029   | 0.44947  | 1036   | 13       | 1027     | 16       | 1063     | 40       | 1027     | 16       | 0.868726 |          |          |          |                |
| Bluecastle_20.FIN2 | 164.2   | 0.837  | 0.1835  | 0.0046   | 0.0264  | 0.00041  | 0.016774 | 170.9  | 3.9      | 168      | 2.6      | 183      | 58       | 168      | 2.6      | 1.696899 |          |          |          |                |
| Bluecastle_21.FIN2 | 171.5   | 1.138  | 0.0929  | 0.0044   | 0.01361 | 0.00027  | 0.34101  | 90.1   | 4.1      | 87.2     | 1.7      | 144      | 87       | 87.2     | 1.7      | 3.218646 |          |          |          |                |
| Bluecastle_22.FIN2 | 86.5    | 0.4737 | 0.1408  | 0.0077   | 0.01959 | 0.00069  | 0.092306 | 133.6  | 6.8      | 125      | 4.4      | 270      | 150      | 125      | 4.4      | 6.437126 |          |          |          |                |
| Bluecastle_23.FIN2 | 157.4   | 2.379  | 4.503   | 0.04     | 0.298   | 0.0027   | 0.40567  | 1729.7 | 6.8      | 1681     | 13       | 1784     | 16       | 1784     | 16       | 5.77354  |          |          |          |                |
| Bluecastle_24.FIN2 | 214.2   | 0.5633 | 0.1682  | 0.0066   | 0.02395 | 0.00058  | 0.095029 | 157.7  | 5.7      | 152.6    | 3.7      | 227      | 81       | 152.6    | 3.7      | 3.233899 |          |          |          |                |
| Bluecastle_25.FIN2 | 90.8    | 0.9751 | 0.85    | 0.012    | 0.1003  | 0.0011   | 0.1904   | 624.3  | 6.8      | 616      | 6.3      | 659      | 38       | 616      | 6.3      | 1.329489 |          |          |          |                |
| Bluecastle_26.FIN2 | 164     | 1.3    | 0.361   | 0.0089   | 0.04782 | 0.00067  | 0.076037 | 312.5  | 6.6      | 301.1    | 4.1      | 379      | 55       | 301.1    | 4.1      | 3.648    |          |          |          |                |
| Bluecastle_27.FIN2 | 188     | 2.489  | 0.446   | 0.019    | 0.059   | 0.0017   | 0.40288  | 374    | 13       | 369      | 10       | 353      | 78       | 369      | 10       | 1.336898 |          |          |          |                |
| Bluecastle_27.FIN2 | 89.2    | 0.535  | 1.64    | 0.041    | 0.1596  | 0.0029   | 0.6195   | 985    | 16       | 954      | 16       | 1056     | 49       | 954      | 16       | 3.147208 |          |          |          |                |
| Bluecastle_28.FIN2 | 59.8    | 1.508  | 1.979   | 0.051    | 0.1619  | 0.0039   | 0.59571  | 1107   | 17       | 967      | 22       | 1383     | 44       | 967      | 22       | 12.64679 |          |          |          |                |
| Bluecastle_28.FIN2 | 32.3    | 1.257  | 2.5     | 0.11     | 0.1991  | 0.0054   | 0.089308 | 1270   | 30       | 1170     | 29       | 1395     | 93       | 1170     | 29       | 7.874016 |          |          |          |                |
| Bluecastle_29.FIN2 | 142.1   | 0.7649 | 4.19    | 0.048    | 0.2675  | 0.0031   | 0.63056  | 1671.5 | 9.5      | 1528     | 16       | 1853     | 18       | 1853     | 18       | 17.53913 |          |          |          |                |
| Bluecastle_30.FIN2 | 67.6    | 0.934  | 0.0698  | 0.0037   | 0.01045 | 0.00026  | 0.067571 | 68.9   | 3.6      | 67       | 1.7      | 150      | 120      | 67       | 1.7      | 2.75762  |          |          |          |                |
| Bluecastle_31.FIN2 | 372     | 1.13   | 0.507   | 0.016    | 0.06312 | 0.00064  | 0.15401  | 411.6  | 5.9      | 394.6    | 3.9      | 501      | 44       | 394.6    | 3.9      | 4.130224 |          |          |          |                |
| Bluecastle_32.FIN2 | 105.9   | 1.946  | 1.601   | 0.024    | 0.1552  | 0.0017   | 0.4614   | 970.2  | 9.2      | 930.2    | 9.6      | 1044     | 29       | 930.2    | 9.6      | 4.122861 |          |          |          |                |
| Bluecastle_33.FIN2 | 48.8    | 0.893  | 0.108   | 0.013    | 0.01119 | 0.00043  | 0.2924   | 103    | 12       | 71.7     | 2.7      | 780      | 210      | DISC     | DISC     | 30.38835 |          |          |          |                |
| Bluecastle_34.FIN2 | 157.6   | 1.77   | 5.016   | 0.09     | 0.3205  | 0.0064   | 0.70244  | 1826   | 14       | 1791     | 31       | 1856     | 25       | 1856     | 25       | 3.502155 |          |          |          |                |
| Bluecastle_35.FIN2 | 197     | 1.157  | 0.0767  | 0.0039   | 0.01057 | 0.00024  | 0.1212   | 74.9   | 3.7      | 67.8     | 1.5      | 310      | 120      | 67.8     | 1.5      | 9.479306 |          |          |          |                |
| Bluecastle_36.FIN2 | 106.7   | 0.802  | 2.322   | 0.057    | 0.1892  | 0.0032   | 0.72004  | 1218   | 17       | 1117     | 17       | 1387     | 36       | 1117     | 17       | 8.292282 |          |          |          |                |
| Bluecastle_37.FIN2 | 227.5   | 3.5    | 3.543   | 0.049    | 0.2458  | 0.0032   | 0.74947  | 1538   | 11       | 1416     | 16       | 1696     | 16       | 1696     | 16       | 16.50943 |          |          |          |                |
| Bluecastle_39.FIN2 | 70.7    | 2.44   | 1.703   | 0.023    | 0.1666  | 0.0019   | 0.49035  | 1009.2 | 8.7      | 993      | 10       | 1034     | 29       | 993      | 10       | 1.605232 |          |          |          |                |
| Bluecastle_40.FIN2 | 192     | 0.876  | 0.275   | 0.0086   | 0.0363  | 0.00067  | 0.19659  | 246.3  | 6.8      | 229.8    | 4.1      | 394      | 83       | 229.8    | 4.1      | 6.699147 |          |          |          |                |
| Bluecastle_41.FIN2 | 188.6   | 1.447  | 1.693   | 0.041    | 0.1591  | 0.0016   | 0.68013  | 1002   | 14       | 951.7    | 8.8      | 1105     | 36       | 951.7    | 8.8      | 5.01996  |          |          |          |                |
| Bluecastle_42.FIN2 | 621     | 7.58   | 3.948   | 0.073    | 0.267   | 0.0065   | 0.88753  | 1623   | 15       | 1524     | 33       | 1753     | 18       | 1753     | 18       | 13.06332 |          |          |          |                |
| Bluecastle_43.FIN2 | 43.31   | 1.164  | 5.06    | 0.12     | 0.3076  | 0.0074   | 0.79579  | 1828   | 20       | 1727     | 37       | 1925     | 33       | 1925     | 33       | 10.28571 |          |          |          |                |
| Bluecastle_44.FIN2 | 446     | 1.809  | 0.4369  | 0.0045   | 0.0548  | 0.00057  | 0.014362 | 368    | 3.2      | 343.9    | 3.5      | 508      | 33       | 343.9    | 3.5      | 6.548913 |          |          |          |                |
| Bluecastle_45.FIN2 | 529     | 0.8314 | 0.0922  | 0.0022   | 0.01373 | 0.00023  | 0.33579  | 89.9   | 1.9      | 87.9     | 1.5      | 165      | 56       | 87.9     | 1.5      | 2.224694 |          |          |          |                |
| Bluecastle_45.FIN2 | 1112    | 1.039  | 0.1002  | 0.0026   | 0.01255 | 0.00026  | 0.4521   | 97     | 2.4      | 80.4     | 1.7      | 539      | 81       | 80.4     | 1.7      | 17.1134  |          |          |          |                |
| Bluecastle_46.FIN2 | 321     | 1.17   | 0.0752  | 0.0022   | 0.01136 | 0.00019  | 0.21072  | 73.5   | 2        | 72.8     | 1.2      | 67       | 53       | 72.8     | 1.2      | 0.952381 |          |          |          |                |
| Bluecastle_47.FIN2 | 98.1    | 1.254  | 4.214   | 0.041    | 0.2797  | 0.0026   | 0.59469  | 1676.1 | 7.9      | 1589     | 13       | 1793     | 15       | 1793     | 15       | 11.37758 |          |          |          |                |
| Bluecastle_48.FIN2 | 77.6    | 0.971  | 2.134   | 0.023    | 0.1904  | 0.0023   | 0.42025  | 1160.4 | 7.6      | 1125     | 12       | 1228     | 24       | 1125     | 12       | 3.050672 |          |          |          |                |
| Bluecastle_49.FIN2 | 85.4    | 1.362  | 1.75    | 0.023    | 0.1692  | 0.0019   | 0.50877  | 1026.4 | 8.4      | 1008     | 11       | 1078     | 23       | 1008     | 11       | 1.792673 |          |          |          |                |
| Bluecastle_50.FIN2 | 152.9   | 1.374  | 0.1946  | 0.0052   | 0.0274  | 0.00047  | 0.12025  | 180.3  | 4.4      | 174.2    | 3        | 233      | 57       | 174.2    | 3        | 3.38325  |          |          |          |                |
| Bluecastle_51.FIN2 | 71.6    | 1.918  | 1.612   | 0.024    | 0.1581  | 0.0019   | 0.26414  | 974.1  | 9.1      | 946      | 11       | 1026     | 31       | 946      | 11       | 2.884714 |          |          |          |                |
| Bluecastle_52.FIN2 | 76.3    | 1.526  | 0.563   | 0.019    | 0.0742  | 0.0016   | 0.12945  | 453    | 12       | 461.3    | 9.7      | 413      | 72       | 461.3    | 9.7      | 1.83223  |          |          |          |                |
| Bluecastle_53.FIN2 | 277     | 1.242  | 0.0929  | 0.0028   | 0.0144  | 0.00027  | 0.27012  | 90.2   | 2.6      | 92.2     | 1.7      | 56       | 63       | 92.2     | 1.7      | 2.217295 |          |          |          |                |
| Bluecastle_54.FIN2 | 42.2    | 0.679  | 0.168   | 0.012    | 0.02362 | 0.00086  | 0.093642 | 161    | 11       | 150.5    | 5.4      | 320      | 160      | 150.5    | 5.4      | 6.521739 |          |          |          |                |
| Bluecastle_55.FIN2 | 34.19   | 0.877  | 0.17    | 0.021    | 0.0227  | 0.0014   | 0.29868  | 159    | 18       | 144.8    | 8.7      | 420      | 270      | 144.8    | 8.7      | 8.930818 |          |          |          |                |
| Bluecastle_56.FIN2 | 192.9   | 1.278  | 0.1719  | 0.0048   | 0.02477 | 0.00047  | 0.069603 | 161    | 4.1      | 157.7    | 3        | 202      | 77       | 157.7    | 3        | 2.049689 |          |          |          |                |
| Bluecastle_57.FIN2 | 71.7    | 0.423  | 2.203   | 0.036    | 0.1991  | 0.0031   | 0.39227  | 1181   | 11       | 1170     | 17       | 1215     | 32       | 1170     | 17       | 0.931414 |          |          |          |                |
| Bluecastle_58.FIN2 | 278     | 3.02   | 4.466   | 0.034    | 0.3008  | 0.0027   | 0.72232  | 1724.3 | 6.3      | 1697     | 13       | 1770     | 12       | 1770     | 12       | 4.124294 |          |          |          |                |
| Bluecastle_59.FIN2 | 87      | 1.162  | 1.775   | 0.025    | 0.1708  | 0.0018   | 0.53234  | 1035.7 | 9.1      | 1016.5   | 9.7      | 1084     | 24       | 1016.5   | 9.7      | 1.853819 |          |          |          |                |
| Bluecastle_60.FIN2 | 45      | 5.173  | 2.788   | 0.035    | 0.2258  | 0.0026   | 0.33438  | 1351.4 | 9.3      | 1314     | 13       | 1445     | 28       | 1445     | 28       | 9.065744 |          |          |          |                |
| Bluecastle_61.FIN2 | 86.6    | 2.083  | 2.883   | 0.039    | 0.2324  | 0.0034   | 0.58552  | 1377   | 10       | 1347     | 18       | 1446     | 25       | 1446     | 25       | 6.846743 |          |          |          |                |
| Bluecastle_62.FIN2 | 102.6   | 0.727  | 0.072   | 0.005    | 0.01091 | 0.00032  | 0.39157  | 70.5   | 4.7      | 69.9     | 2        | 110      | 140      | 69.9     | 2        | 0.851064 |          |          |          |                |
| Bluecastle_63.FIN2 | 5.91    | 1.853  | 8.38    | 0.33     | 0.2618  | 0.0097   | 0.49461  | 2273   | 36       | 1497     | 50       | 3062     | 71       | DISC     | DISC     | 51.11039 |          |          |          |                |
| Bluecastle_64.FIN2 | 59.9    | 1.169  | 2.29    | 0.037    | 0.1917  | 0.0026   | 0.59104  | 1209   | 11       | 1132     | 14       | 1368     | 26       | 1132     | 14       | 6.3689   |          |          |          |                |
| Bluecastle_65.FIN2 | 139.2   | 1.307  | 2.505   | 0.044    | 0.1991  | 0.0036   | 0.84062  | 1274   | 13       | 1170     | 19       | 1462     | 16       | 1170     | 19       |          |          |          |          |                |

|                     |       |        |        |        |         |         |          |        |     |        |     |      |     |        |      |          |
|---------------------|-------|--------|--------|--------|---------|---------|----------|--------|-----|--------|-----|------|-----|--------|------|----------|
| Bluecastle_91.FIN2  | 87.4  | 1.154  | 3.807  | 0.04   | 0.2707  | 0.0027  | 0.48932  | 1595.7 | 8.8 | 1544   | 14  | 1675 | 19  | 1675   | 19   | 7.820896 |
| Bluecastle_92.FIN2  | 39.45 | 1.25   | 2.929  | 0.061  | 0.2344  | 0.0027  | 0.080251 | 1388   | 16  | 1357   | 14  | 1432 | 46  | 1432   | 46   | 5.23743  |
| Bluecastle_93.FIN2  | 164.9 | 1.609  | 4.41   | 0.12   | 0.2795  | 0.0061  | 0.68354  | 1713   | 23  | 1588   | 31  | 1885 | 30  | 1885   | 30   | 15.75597 |
| Bluecastle_94.FIN2  | 204   | 6.17   | 3.026  | 0.02   | 0.2406  | 0.0016  | 0.39158  | 1414.6 | 5.2 | 1389.6 | 8.4 | 1446 | 15  | 1446   | 15   | 3.900415 |
| Bluecastle_95.FIN2  | 67    | 2.21   | 0.546  | 0.013  | 0.0692  | 0.0014  | 0.22579  | 442.7  | 8.3 | 431.1  | 8.3 | 487  | 60  | 431.1  | 8.3  | 2.620285 |
| Bluecastle_96.FIN2  | 66.3  | 1.553  | 7.86   | 0.11   | 0.3978  | 0.005   | 0.79679  | 2215   | 13  | 2158   | 23  | 2272 | 18  | 2272   | 18   | 5.017606 |
| Bluecastle_97.FIN2  | 231   | 1.299  | 1.528  | 0.019  | 0.1502  | 0.0015  | 0.6097   | 943.3  | 7.5 | 902    | 8.7 | 1030 | 19  | 902    | 8.7  | 4.378247 |
| Bluecastle_98.FIN2  | 606   | 1.369  | 0.0766 | 0.0029 | 0.01147 | 0.00019 | 0.19467  | 74.9   | 2.7 | 73.5   | 1.2 | 133  | 83  | 73.5   | 1.2  | 1.869159 |
| Bluecastle_99.FIN2  | 45.1  | 1.367  | 2.607  | 0.045  | 0.2127  | 0.0039  | 0.20306  | 1302   | 13  | 1243   | 21  | 1394 | 40  | 1394   | 40   | 10.83214 |
| Bluecastle_100.FIN2 | 185   | 1.433  | 0.468  | 0.014  | 0.0609  | 0.0012  | 0.50607  | 391.5  | 9.3 | 381    | 7.1 | 437  | 58  | 381    | 7.1  | 2.681992 |
| Bluecastle_101.FIN2 | 41.6  | 0.613  | 2.5    | 0.036  | 0.2089  | 0.0021  | 0.27464  | 1271   | 11  | 1223   | 11  | 1378 | 30  | 1378   | 30   | 11.24819 |
| Bluecastle_102.FIN2 | 378   | 45.9   | 1.827  | 0.016  | 0.1751  | 0.0015  | 0.59443  | 1055.8 | 5.8 | 1040.1 | 8   | 1086 | 16  | 1040.1 | 8    | 1.487024 |
| Bluecastle_103.FIN2 | 114   | 1.279  | 2.978  | 0.029  | 0.2384  | 0.002   | 0.43375  | 1402.4 | 7.6 | 1378   | 10  | 1448 | 18  | 1448   | 18   | 4.834254 |
| Bluecastle_104.FIN2 | 184   | 0.579  | 0.53   | 0.09   | 0.027   | 0.001   | 0.90443  | 432    | 59  | 171.7  | 6.6 | 1960 | 240 | DISC   | DISC | 60.25463 |
| Bluecastle_105.FIN2 | 245.6 | 1.584  | 4.338  | 0.087  | 0.2847  | 0.003   | 0.14586  | 1701   | 17  | 1615   | 15  | 1810 | 37  | 1810   | 37   | 10.77348 |
| Bluecastle_106.FIN2 | 37.8  | 2.99   | 2.56   | 0.1    | 0.2123  | 0.0067  | 0.59834  | 1285   | 30  | 1240   | 36  | 1346 | 64  | 1346   | 64   | 7.875186 |
| Bluecastle_107.FIN2 | 120.5 | 1.961  | 0.523  | 0.012  | 0.06896 | 0.00068 | 0.31651  | 426.6  | 7.6 | 429.9  | 4.1 | 396  | 48  | 429.9  | 4.1  | 0.773558 |
| Bluecastle_109.FIN2 | 37.1  | 2.267  | 4.91   | 0.1    | 0.3151  | 0.0048  | 0.29155  | 1802   | 18  | 1765   | 24  | 1841 | 44  | 1841   | 44   | 4.128191 |
| Bluecastle_110.FIN2 | 130.4 | 0.435  | 0.356  | 0.042  | 0.02671 | 0.00054 | 0.70043  | 300    | 31  | 169.9  | 3.4 | 1300 | 200 | DISC   | DISC | 43.36667 |
| Bluecastle_111.FIN2 | 121.3 | 1.44   | 2.656  | 0.026  | 0.2193  | 0.0028  | 0.48372  | 1316   | 7.2 | 1278   | 15  | 1368 | 24  | 1368   | 24   | 6.578947 |
| Bluecastle_112.FIN2 | 217.1 | 0.3945 | 0.0972 | 0.0036 | 0.01442 | 0.00024 | 0.029801 | 94.1   | 3.3 | 92.3   | 1.5 | 140  | 72  | 92.3   | 1.5  | 1.912859 |
| Bluecastle_113.FIN2 | 47.7  | 0.748  | 0.735  | 0.018  | 0.0912  | 0.0014  | 0.22127  | 559    | 10  | 562.6  | 8.4 | 526  | 59  | 562.6  | 8.4  | 0.644007 |
| Bluecastle_114.FIN2 | 126.9 | 0.847  | 0.512  | 0.047  | 0.02503 | 0.00061 | 0.38306  | 415    | 31  | 159.4  | 3.9 | 2240 | 150 | DISC   | DISC | 61.59036 |
| Bluecastle_115.FIN2 | 244   | 1.149  | 0.1724 | 0.008  | 0.02294 | 0.00043 | 0.53022  | 161.1  | 6.9 | 146.2  | 2.7 | 385  | 85  | 146.2  | 2.7  | 9.248914 |
| Bluecastle_116.FIN2 | 94.8  | 0.989  | 1.849  | 0.03   | 0.1754  | 0.0021  | 0.36795  | 1062   | 10  | 1041   | 12  | 1085 | 35  | 1041   | 12   | 1.977401 |
| Bluecastle_117.FIN2 | 163.1 | 1.933  | 2.001  | 0.022  | 0.1837  | 0.0015  | 0.52336  | 1115.3 | 7.4 | 1087.2 | 8.3 | 1166 | 19  | 1087.2 | 8.3  | 2.519501 |
| Bluecastle_118.FIN2 | 186   | 1.318  | 1.915  | 0.023  | 0.1838  | 0.0018  | 0.56973  | 1085.8 | 7.9 | 1087.4 | 9.7 | 1078 | 20  | 1087.4 | 9.7  | 0.147357 |
| Bluecastle_119.FIN2 | 180.9 | 1.24   | 3.072  | 0.025  | 0.2436  | 0.0016  | 0.52302  | 1426.1 | 6   | 1405.4 | 8.1 | 1440 | 14  | 1440   | 14   | 2.402778 |
| Bluecastle_120.FIN2 | 131   | 0.668  | 0.17   | 0.0044 | 0.0246  | 0.00046 | 0.026795 | 159.3  | 3.8 | 156.7  | 2.9 | 197  | 66  | 156.7  | 2.9  | 1.632141 |
| Bluecastle_121.FIN2 | 107.5 | 0.526  | 0.1553 | 0.0063 | 0.0223  | 0.00055 | 0.16936  | 146.3  | 5.6 | 142.2  | 3.5 | 207  | 89  | 142.2  | 3.5  | 2.802461 |

|                 |       |       |        |        |         |         |          |        |     |        |      |        |     |        |      |          |
|-----------------|-------|-------|--------|--------|---------|---------|----------|--------|-----|--------|------|--------|-----|--------|------|----------|
| 13GRT01_1.FIN2  | 62.7  | 1.428 | 6.462  | 0.013  | 0.1661  | 0.0011  | 0.28663  | 986.4  | 4.9 | 991.6  | 6.5  | 978    | 11  | 991.6  | 6.5  | 0.52717  |
| 13GRT01_2.FIN2  | 191   | 1.657 | 4.956  | 0.04   | 0.3245  | 0.003   | 0.74505  | 1812.3 | 6.9 | 1811   | 15   | 1812.8 | 7.9 | 1812.8 | 7.9  | 0.099294 |
| 13GRT01_3.FIN2  | 56.9  | 0.672 | 14.37  | 0.15   | 0.5476  | 0.0053  | 0.36122  | 2773   | 10  | 2814   | 22   | 2754.9 | 7.8 | 2754.9 | 7.8  | 2.145268 |
| 13GRT01_4.FIN2  | 119.7 | 0.767 | 3.158  | 0.029  | 0.2422  | 0.0018  | 0.72599  | 1446.6 | 7   | 1397.9 | 9.2  | 1523.2 | 9.2 | 1523.2 | 9.2  | 8.226103 |
| 13GRT01_5.FIN2  | 116.9 | 1.222 | 0.909  | 0.0074 | 0.10947 | 0.00082 | 0.37211  | 656.4  | 4   | 669.6  | 4.7  | 620    | 11  | 669.6  | 4.7  | 2.010969 |
| 13GRT01_6.FIN2  | 211   | 1.74  | 1.79   | 0.017  | 0.1791  | 0.0016  | 0.65595  | 1041.7 | 6.1 | 1062.2 | 8.9  | 1008.5 | 8.9 | 1062.2 | 8.9  | 1.967937 |
| 13GRT01_7.FIN2  | 234   | 1.732 | 1.466  | 0.018  | 0.1454  | 0.0015  | 0.83309  | 916.2  | 7.3 | 875    | 8.7  | 1019.1 | 8.9 | 875    | 8.7  | 4.496835 |
| 13GRT01_8.FIN2  | 42.9  | 0.766 | 12.13  | 0.1    | 0.4443  | 0.0035  | 0.44278  | 2614.4 | 7.7 | 2369   | 16   | 2809.4 | 9.5 | 2809.4 | 9.5  | 15.67595 |
| 13GRT01_9.FIN2  | 58.7  | 1.257 | 1.846  | 0.015  | 0.184   | 0.0013  | 0.51297  | 1061.8 | 5.3 | 1088.7 | 7    | 1006   | 11  | 1088.7 | 7    | 2.533434 |
| 13GRT01_10.FIN2 | 399   | 1.009 | 0.0999 | 0.0013 | 0.01513 | 0.00017 | 0.37378  | 96.7   | 1.2 | 96.8   | 1.1  | 122    | 15  | 96.8   | 1.1  | 0.103413 |
| 13GRT01_11.FIN2 | 77.4  | 0.483 | 13.746 | 0.076  | 0.532   | 0.0033  | 0.73003  | 2733.5 | 5.5 | 2750   | 14   | 2725.4 | 5.1 | 2725.4 | 5.1  | 0.90262  |
| 13GRT01_12.FIN2 | 297   | 1.118 | 0.1034 | 0.0013 | 0.01551 | 0.00016 | 0.34713  | 99.9   | 1.2 | 99.2   | 1    | 125    | 19  | 99.2   | 1    | 0.700701 |
| 13GRT01_13.FIN2 | 175   | 1.835 | 3.291  | 0.025  | 0.261   | 0.0016  | 0.75703  | 1478.6 | 6.1 | 1494.6 | 8.3  | 1449.9 | 7.3 | 1449.9 | 7.3  | 3.082971 |
| 13GRT01_14.FIN2 | 15.2  | 0.671 | 4.149  | 0.057  | 0.2955  | 0.0037  | 0.13311  | 1663   | 11  | 1669   | 19   | 1656   | 12  | 1656   | 12   | 0.785024 |
| 13GRT01_15.FIN2 | 55.12 | 2.205 | 14.852 | 0.081  | 0.5471  | 0.0039  | 0.62838  | 2805.5 | 5.2 | 2813   | 16   | 2803.9 | 5.5 | 2803.9 | 5.5  | 0.324548 |
| 13GRT01_16.FIN2 | 866   | 1.6   | 0.1005 | 0.0015 | 0.01441 | 0.00012 | 0.15696  | 97.2   | 1.4 | 92.21  | 0.75 | 220    | 30  | 92.21  | 0.75 | 5.133745 |
| 13GRT01_17.FIN2 | 63.2  | 0.666 | 3.635  | 0.025  | 0.2718  | 0.002   | 0.53017  | 1557.8 | 5.7 | 1550   | 10   | 1556.2 | 7.9 | 1556.2 | 7.9  | 0.398406 |
| 13GRT01_18.FIN2 | 231   | 1.888 | 0.1164 | 0.0042 | 0.01622 | 0.00015 | 0.21518  | 111.7  | 3.8 | 103.73 | 0.95 | 323    | 76  | 103.73 | 0.95 | 7.135184 |
| 13GRT01_19.FIN2 | 40.15 | 1.357 | 0.682  | 0.011  | 0.08644 | 0.00098 | 0.029893 | 527.6  | 6.5 | 534.4  | 5.8  | 500    | 23  | 534.4  | 5.8  | 1.288855 |
| 13GRT01_20.FIN2 | 172.7 | 0.695 | 13.71  | 0.18   | 0.5218  | 0.0054  | 0.84082  | 2729   | 13  | 2706   | 23   | 2758   | 7.3 | 2758   | 7.3  | 1.885424 |
| 13GRT01_21.FIN2 | 53.7  | 0.958 | 4.262  | 0.049  | 0.2998  | 0.0029  | 0.53627  | 1685.2 | 9.4 | 1690   | 14   | 1684   | 13  | 1684   | 13   | 0.356295 |
| 13GRT01_22.FIN2 | 59    | 1.765 | 13.693 | 0.083  | 0.5397  | 0.0039  | 0.74342  | 2728.4 | 5.7 | 2782   | 16   | 2688.7 | 5.5 | 2688.7 | 5.5  | 3.470078 |
| 13GRT01_23.FIN2 | 228.7 | 1.063 | 0.5104 | 0.0064 | 0.06706 | 0.00061 | 0.48622  | 418.6  | 4.2 | 418.4  | 3.7  | 420    | 14  | 418.4  | 3.7  | 0.047778 |
| 13GRT01_24.FIN2 | 397   | 1.809 | 0.1109 | 0.0025 | 0.01638 | 0.00027 | 0.397    | 106.8  | 2.3 | 104.7  | 1.7  | 177    | 23  | 104.7  | 1.7  | 1.966292 |
| 13GRT01_25.FIN2 | 470   | 12.1  | 0.4673 | 0.0076 | 0.0616  | 0.001   | 0.55273  | 390.1  | 5   | 385.3  | 6.2  | 434    | 13  | 385.3  | 6.2  | 1.230454 |
| 13GRT01_26.FIN2 | 413   | 1.468 | 0.0984 | 0.0018 | 0.01433 | 0.00034 | 0.44776  | 95.3   | 1.7 | 91.7   | 2.1  | 205    | 35  | 91.7   | 2.1  | 3.777545 |
| 13GRT01_27.FIN2 | 163   | 1.304 | 0.0958 | 0.002  | 0.01494 | 0.00014 | 0.079651 | 92.9   | 1.8 | 95.61  | 0.91 | 120    | 21  | 95.61  | 0.91 | 2.917115 |
| 13GRT01_28.FIN2 | 182.6 | 3.29  | 4.92   | 0.095  | 0.2824  | 0.0033  | 0.15086  | 1804   | 16  | 1603   | 17   | 2016   | 42  | 2016   | 42   | 20.48611 |
| 13GRT01_29.FIN2 | 153.1 | 0.733 | 0.104  | 0.0021 | 0.01568 | 0.00019 | 0.36268  | 100.4  | 1.9 | 100.3  | 1.2  | 158    | 26  | 100.3  | 1.2  | 0.099602 |
| 13GRT01_30.FIN2 | 23.5  | 0.513 | 7.54   | 0.65   | 0.238   | 0.0078  | 0.92635  | 2141   | 84  | 1375   | 41   | 3004   | 97  | DISC   | DISC | 54.2277  |
| 13GRT01_31.FIN2 | 78.2  | 1.513 | 2.105  | 0.017  | 0.2     | 0.0017  | 0.48294  | 1150.2 | 5.4 | 1175.4 | 9.1  | 1114.7 | 9.7 | 1175.4 | 9.1  | 2.190923 |
| 13GRT01_32.FIN2 | 26.25 | 0.519 | 1.947  | 0.028  | 0.186   | 0.0019  | 0.21907  | 1098.8 | 9.2 | 1099   | 10   | 1103   | 17  | 1099   | 10   | 0.018202 |
| 13GRT01_33.FIN2 | 527   | 5.8   | 4.28   | 0.15   | 0.2733  | 0.007   | 0.70514  | 1694   | 31  | 1557   | 35   | 1908   | 55  | 1908   | 55   | 18.39623 |
| 13GRT01_33.FIN2 | 284.9 | 1.728 | 11.39  | 0.13   | 0.4699  | 0.0057  | 0.75496  | 2555   | 11  | 2483   | 25   | 2611   | 10  | 2611   | 10   | 4.902336 |
| 13GRT01_34.FIN2 | 270.1 | 5.73  | 4.662  | 0.04   | 0.3157  | 0.0028  | 0.6797   | 1760.1 | 7.2 | 1769   | 14   | 1752   | 14  | 1752   | 14   | 0.97032  |
| 13GRT01_34.FIN2 | 53    | 2.35  | 6.548  | 0.08   | 0.3813  | 0.0051  | 0.44829  | 2052   | 11  | 2082   | 24   | 2027   | 20  | 2027   | 20   | 2.71337  |
| 13GRT01_35.FIN2 | 154.3 | 31.3  | 1.821  | 0.011  | 0.1816  | 0.0012  | 0.47246  | 1052.8 | 3.9 | 1075.7 | 6.5  | 1012.5 | 8.3 | 1075.7 | 6.5  | 2.175152 |
| 13GRT01_36.FIN2 | 403   | 3.551 | 0.1121 | 0.0013 | 0.01685 | 0.00017 | 0.50889  | 107.9  | 1.2 | 107.7  | 1.1  | 124    | 16  | 107.7  | 1.1  | 0.185357 |
| 13GRT01_37.FIN2 | 60.9  | 0.852 | 4.107  | 0.031  | 0.2929  | 0.0025  | 0.60791  | 1655.5 | 6.1 | 1656   | 13   | 1657.7 | 7.7 | 1657.7 | 7.7  | 0.102552 |
| 13GRT01_38.FIN2 | 186.2 | 1.91  | 1.866  | 0.01   | 0.1856  | 0.0011  | 0.54761  | 1069.1 | 3.7 | 1097.6 | 6    | 1012.3 | 8.2 | 1097.6 | 6    | 2.665794 |
| 13GRT01_39.FIN2 | 60.4  | 1.219 | 3.294  | 0.032  | 0.2629  | 0.0022  | 0.71075  | 1479.7 | 7.7 | 1504   | 11   | 1434   | 11  | 1434   | 11   | 4.88145  |
| 13GRT01_40.FIN2 | 72.6  | 1.831 | 14.204 | 0.095  | 0.5455  | 0.0049  | 0.51822  | 2764   | 6.2 | 2806   | 20   | 2738.3 | 7.5 | 2738.3 | 7.5  | 2.472337 |
| 13GRT01_41.FIN2 | 522   | 1.156 | 0.1005 | 0.0013 | 0.01527 | 0.00014 | 0.42968  | 97.2   | 1.2 | 97.71  | 0.89 | 109    | 14  | 97.71  | 0.89 | 0.524691 |
| 13GRT01_42.FIN2 | 88.3  | 2.59  | 2.631  | 0.043  | 0.2258  | 0.0029  | 0.88189  | 1308   | 12  | 1314   | 15   | 1297.1 | 9.1 | 1297.1 | 9.1  | 1.302906 |
| 13GRT01_43.FIN2 | 114.3 | 1.192 | 5.079  | 0.027  | 0.3377  | 0.0019  | 0.51808  | 1832.4 | 4.6 | 1875.6 | 9.2  | 1779.9 | 5.6 | 1779.9 | 5.6  | 5.376707 |
| 13GRT01_44.FIN2 | 228   | 0.825 | 0.0886 | 0.0018 | 0.0133  | 0.00014 | 0.39688  | 86.2   | 1.7 | 85.16  | 0.91 | 125    | 20  | 85.16  | 0.91 | 1.206497 |
| 13GRT01_45.FIN2 | 20.5  | 2.08  | 5      | 0.12   | 0.3341  | 0.0065  | 0.45918  | 1819   | 19  | 1858   | 31   | 1785   | 24  | 1785   | 24   | 4.089636 |
| 13GRT01_45.FIN2 | 72.2  | 0.609 | 9.54   | 0.11   | 0.4525  | 0.0044  | 0.77953  | 2390   | 10  | 2406   | 20   | 2377.6 | 8.6 | 2377.6 | 8.6  | 1.194482 |
| 13GRT01_46.FIN2 | 111.3 | 0.391 | 13.08  | 0.099  | 0.5063  | 0.0038  | 0.80825  | 2686.9 | 7.4 | 2640   | 16   | 2718.9 | 5.4 | 2718.9 | 5.4  | 2.901909 |
| 13GRT01_47.FIN2 | 34.17 | 1.435 | 1.73   | 0.017  | 0.169   | 0.0013  | 0.50754  | 1020.2 | 6.3 | 1006.7 | 7.2  | 1044   | 10  | 1006.7 | 7.2  | 1.32327  |
| 13GRT01_48.FIN2 | 351   | 5.65  | 0.536  | 0.0049 | 0.06546 | 0.00097 | 0.095947 | 435.7  | 3.2 | 408.7  | 5.8  | 585    | 38  | 408.7  | 5.8  | 6.196924 |
| 13GRT01_49.FIN2 | 542   | 1.876 | 0.1197 | 0.0012 | 0.01787 | 0.00015 | 0.46068  | 114.8  | 1.1 | 114.17 | 0.95 | 123    | 13  | 114.17 | 0.95 | 0.54878  |
| 13GRT01_50.FIN2 | 298   | 10.58 | 1.685  | 0.028  | 0.1667  | 0.0026  | 0.91125  | 1002   | 10  | 994    | 14   | 1023   | 8.2 | 994    | 14   | 0.798403 |
| 13GRT01_50.FIN2 | 32.6  | 2.18  | 2.635  | 0.088  | 0.2174  | 0.0032  | 0.74519  | 1308   | 25  | 1268   | 17   | 1370   | 44  | 1370   | 44   | 7.445255 |
| 13GRT01_51.FIN2 | 122.9 | 1.38  | 0.7365 | 0.0076 | 0.09134 | 0.00068 | 0.31663  | 560.2  | 4.4 | 563.4  | 4    | 545    | 15  | 563.4  | 4    | 0.571225 |
| 13GRT01_52.FIN2 | 186   | 0.954 | 0.1007 | 0.0017 | 0.01568 | 0.00018 | 0.043609 | 97.4   | 1.6 | 100.3  | 1.2  | 114    | 21  | 100.3  | 1.2  | 2.977413 |
| 13GRT01_53.FIN2 | 71.7  | 0.84  | 2.674  | 0.019  | 0.2264  | 0.0015  | 0.46236  | 1320.9 | 5.2 | 1315.6 | 7.6  | 1331.7 | 8   | 1331.7 | 8    | 1.208981 |
| 13GRT01_54.FIN2 | 321   | 3.67  | 2.234  | 0.017  | 0.2031  | 0.0018  | 0.86702  | 1191.4 | 5.4 | 1191.7 | 9.8  | 1189.8 | 5.9 | 1191.7 | 9.8  | 0.02518  |
| 13GRT01_55.FIN2 | 68.7  | 1.239 | 5.231  | 0.035  | 0.3392  | 0.0026  | 0.63516  | 1857.4 | 5.7 | 1883   | 13   | 1830.4 | 5.7 | 1830.4 | 5.7  | 2.873689 |
| 13GRT01_56.FIN2 | 319   | 0.966 | 0.1063 | 0.0014 | 0.0159  | 0.00013 | 0.33263  | 102.6  | 1.3 | 101.72 | 0.82 | 137    | 16  | 101.72 | 0.82 | 0.8577   |
| 13GRT01_57.FIN2 | 406   | 1.706 | 0.3444 | 0.003  | 0.0477  | 0.00036 | 0.52642  | 300.5  | 2.3 | 300.4  | 2.2  | 310.8  | 9.2 | 300.4  | 2.2  | 0.03278  |
| 13GRT01_58.FIN2 | 241   | 1.225 | 1.644  | 0.024  | 0.1599  | 0.0021  | 0.92919  | 987    | 9.1 | 956    | 12   | 1055.4 | 8.7 | 956    | 12   | 3.140831 |
| 13GRT01_59.FIN2 | 514   | 1.446 | 0.0946 | 0.0012 | 0.01442 | 0.00012 | 0.30808  | 91.8   | 1.1 | 92.27  | 0.74 | 95     | 14  | 92.27  | 0.74 | 0.511983 |
| 13GRT01_60.FIN2 | 222   | 1.4   | 0.993  | 0.018  | 0.1137  | 0.0018  | 0.97854  | 699.7  | 9.6 | 694    | 10   | 713    | 12  | 694    | 10   | 0.814635 |

|                  |       |        |        |        |         |         |          |        |     |        |      |        |     |        |      |          |
|------------------|-------|--------|--------|--------|---------|---------|----------|--------|-----|--------|------|--------|-----|--------|------|----------|
| 13GRT01_61.FIN2  | 348   | 1.184  | 0.1015 | 0.0018 | 0.01561 | 0.00018 | 0.20059  | 98.1   | 1.7 | 99.9   | 1.1  | 97     | 19  | 99.9   | 1.1  | 1.834862 |
| 13GRT01_62.FIN2  | 157.4 | 0.63   | 4.033  | 0.028  | 0.2895  | 0.002   | 0.71085  | 1641.2 | 5.8 | 1638.9 | 9.8  | 1642.4 | 6.9 | 1642.4 | 6.9  | 0.213103 |
| 13GRT01_63.FIN2  | 76    | 1.124  | 4.196  | 0.028  | 0.304   | 0.002   | 0.53773  | 1673.1 | 5.5 | 1711   | 10   | 1626.2 | 7.5 | 1626.2 | 7.5  | 5.214611 |
| 13GRT01_64.FIN2  | 526   | 0.63   | 10.56  | 0.16   | 0.3569  | 0.0049  | 0.9403   | 2483   | 14  | 1967   | 23   | 2933.7 | 5.5 | DISC   | DISC | 32.95156 |
| 13GRT01_65.FIN2  | 69    | 0.907  | 2.073  | 0.014  | 0.1945  | 0.0012  | 0.29428  | 1139.7 | 4.5 | 1145.7 | 6.7  | 1125.4 | 8.2 | 1145.7 | 6.7  | 0.526454 |
| 13GRT01_66.FIN2  | 312   | 1.235  | 0.48   | 0.014  | 0.0629  | 0.0019  | 0.64124  | 397.3  | 9.7 | 393    | 12   | 449    | 15  | 393    | 12   | 1.082306 |
| 13GRT01_67.FIN2  | 93    | 1.637  | 2.726  | 0.022  | 0.2356  | 0.002   | 0.62899  | 1336.1 | 6.2 | 1367   | 10   | 1301.4 | 9.6 | 1301.4 | 9.6  | 5.040725 |
| 13GRT01_68.FIN2  | 229   | 1.595  | 3.315  | 0.023  | 0.2595  | 0.0018  | 0.58381  | 1484.3 | 5.3 | 1488.7 | 9.1  | 1472   | 8.3 | 1472   | 8.3  | 1.134511 |
| 13GRT01_69.FIN2  | 432.6 | 2.53   | 1.945  | 0.019  | 0.18    | 0.0019  | 0.64236  | 1096.6 | 6.5 | 1067   | 10   | 1150.9 | 9.9 | 1067   | 10   | 2.699252 |
| 13GRT01_70.FIN2  | 175   | 2.27   | 0.559  | 0.005  | 0.07268 | 0.00055 | 0.26513  | 450.8  | 3.3 | 452.3  | 3.3  | 441    | 13  | 452.3  | 3.3  | 0.332742 |
| 13GRT01_71.FIN2  | 80.4  | 1.305  | 11.36  | 0.1    | 0.4097  | 0.0036  | 0.9582   | 2552.5 | 8.2 | 2213   | 17   | 2834.3 | 5.7 | 2834.3 | 5.7  | 2.192076 |
| 13GRT01_72.FIN2  | 109   | 0.956  | 4.044  | 0.037  | 0.2862  | 0.0024  | 0.61353  | 1642.8 | 7.4 | 1623   | 12   | 1669.6 | 9.2 | 1669.6 | 9.2  | 2.791088 |
| 13GRT01_73.FIN2  | 218   | 5.34   | 5.121  | 0.036  | 0.34    | 0.002   | 0.62767  | 1840.1 | 6   | 1886.5 | 9.8  | 1787   | 6.3 | 1787   | 6.3  | 5.567991 |
| 13GRT01_74.FIN2  | 118   | 1.422  | 17.07  | 0.22   | 0.5794  | 0.0056  | 0.92499  | 2939   | 13  | 2946   | 23   | 2928.8 | 5.9 | 2928.8 | 5.9  | 0.587271 |
| 13GRT01_75.FIN2  | 332   | 0.786  | 0.106  | 0.0019 | 0.01558 | 0.00016 | 0.41986  | 102.3  | 1.7 | 99.6   | 1    | 172    | 25  | 99.6   | 1    | 2.639296 |
| 13GRT01_76.FIN2  | 240.2 | 0.999  | 2.41   | 0.024  | 0.2028  | 0.0019  | 0.9014   | 1245.4 | 6.9 | 1190   | 10   | 1342.5 | 6   | 1190   | 10   | 4.44837  |
| 13GRT01_77.FIN2  | 18.4  | 0.7356 | 1.891  | 0.023  | 0.1852  | 0.002   | 0.23565  | 1078.4 | 8.1 | 1095   | 11   | 1044   | 14  | 1095   | 11   | 1.539318 |
| 13GRT01_78.FIN2  | 182.7 | 1.646  | 2.128  | 0.012  | 0.1997  | 0.0011  | 0.64667  | 1157.9 | 3.8 | 1173.6 | 5.7  | 1135.5 | 4.6 | 1173.6 | 5.7  | 1.355903 |
| 13GRT01_79.FIN2  | 270   | 1.019  | 0.0988 | 0.0014 | 0.01517 | 0.00015 | 0.31681  | 95.7   | 1.3 | 97.05  | 0.97 | 102    | 20  | 97.05  | 0.97 | 1.410658 |
| 13GRT01_80.FIN2  | 90.6  | 1.77   | 0.5515 | 0.0064 | 0.07221 | 0.00065 | 0.33574  | 446.4  | 4.3 | 449.4  | 3.9  | 444    | 15  | 449.4  | 3.9  | 0.672043 |
| 13GRT01_81.FIN2  | 288   | 1.963  | 3.576  | 0.021  | 0.276   | 0.002   | 0.69184  | 1544.1 | 4.7 | 1571   | 9.9  | 1506.6 | 7.5 | 1506.6 | 7.5  | 4.274525 |
| 13GRT01_82.FIN2  | 96.8  | 1.418  | 1.997  | 0.024  | 0.1892  | 0.0022  | 0.88205  | 1114   | 8.2 | 1117   | 12   | 1106.5 | 7.8 | 1117   | 12   | 0.2693   |
| 13GRT01_83.FIN2  | 127   | 1.704  | 2.05   | 0.019  | 0.1917  | 0.0016  | 0.78745  | 1132   | 6.3 | 1130.4 | 8.4  | 1138.1 | 8.8 | 1130.4 | 8.4  | 0.141343 |
| 13GRT01_84.FIN2  | 107.6 | 1.942  | 2.115  | 0.036  | 0.1846  | 0.0035  | 0.84826  | 1153   | 12  | 1092   | 19   | 1263.3 | 9.4 | 1092   | 19   | 5.290546 |
| 13GRT01_85.FIN2  | 51.3  | 1.376  | 1.22   | 0.02   | 0.1176  | 0.0016  | 0.64632  | 808.9  | 9.1 | 716.8  | 9.2  | 1069   | 14  | 716.8  | 9.2  | 11.38583 |
| 13GRT01_86.FIN2  | 119.3 | 3.229  | 1.768  | 0.012  | 0.1754  | 0.0011  | 0.28968  | 1034.8 | 4.5 | 1041.8 | 6.2  | 1014.4 | 9.6 | 1041.8 | 6.2  | 0.676459 |
| 13GRT01_87.FIN2  | 181.6 | 1.129  | 1.849  | 0.011  | 0.1813  | 0.001   | 0.55226  | 1062.9 | 4.1 | 1073.9 | 5.7  | 1045.3 | 5.5 | 1073.9 | 5.7  | 1.034905 |
| 13GRT01_88.FIN2  | 121.7 | 0.776  | 0.3419 | 0.0044 | 0.04789 | 0.00046 | 0.2152   | 298.5  | 3.3 | 301.5  | 2.8  | 274    | 21  | 301.5  | 2.8  | 1.005025 |
| 13GRT01_89.FIN2  | 58.9  | 0.835  | 0.814  | 0.017  | 0.09114 | 0.00085 | 0.091772 | 605    | 9.9 | 562.2  | 5    | 756    | 39  | 562.2  | 5    | 7.07438  |
| 13GRT01_90.FIN2  | 36.96 | 1.218  | 4.67   | 0.14   | 0.2776  | 0.0038  | 0.35512  | 1769   | 27  | 1579   | 19   | 2020   | 54  | 2020   | 54   | 21.83168 |
| 13GRT01_91.FIN2  | 90.2  | 1.952  | 1.6    | 0.037  | 0.1573  | 0.0038  | 0.9394   | 968    | 15  | 941    | 21   | 1030.9 | 9.2 | 941    | 21   | 2.789256 |
| 13GRT01_92.FIN2  | 60.66 | 0.4609 | 0.5301 | 0.0077 | 0.06852 | 0.00063 | 0.17734  | 432.2  | 5   | 427.2  | 3.8  | 463    | 18  | 427.2  | 3.8  | 1.156872 |
| 13GRT01_93.FIN2  | 208   | 5.25   | 2.809  | 0.037  | 0.1986  | 0.0021  | 0.21924  | 1357.5 | 9.9 | 1168   | 11   | 1673   | 30  | 1168   | 11   | 13.95948 |
| 13GRT01_94.FIN2  | 66.2  | 1.36   | 1.983  | 0.026  | 0.1885  | 0.0017  | 0.60231  | 1109.1 | 9   | 1113   | 9    | 1095   | 14  | 1113   | 9    | 0.351636 |
| 13GRT01_95.FIN2  | 38.6  | 0.96   | 0.7238 | 0.0096 | 0.09075 | 0.00093 | 0.15578  | 552.6  | 5.6 | 559.9  | 5.5  | 522    | 19  | 559.9  | 5.5  | 1.321028 |
| 13GRT01_96.FIN2  | 381   | 1.151  | 0.1805 | 0.002  | 0.02645 | 0.00021 | 0.51773  | 168.5  | 1.7 | 168.3  | 1.3  | 175    | 12  | 168.3  | 1.3  | 0.118694 |
| 13GRT01_97.FIN2  | 68.4  | 1.394  | 1.857  | 0.021  | 0.1802  | 0.0024  | 0.56523  | 1066.3 | 7.4 | 1068   | 13   | 1069   | 13  | 1068   | 13   | 0.15943  |
| 13GRT01_98.FIN2  | 136.3 | 1.431  | 3.265  | 0.038  | 0.2515  | 0.0031  | 0.80658  | 1472.5 | 9   | 1446   | 16   | 1494.3 | 7.4 | 1494.3 | 7.4  | 3.232283 |
| 13GRT01_99.FIN2  | 349   | 2.363  | 0.682  | 0.041  | 0.0789  | 0.0025  | 0.95672  | 526    | 24  | 489    | 15   | 688    | 54  | 489    | 15   | 7.034221 |
| 13GRT01_100.FIN2 | 280.3 | 8.41   | 0.4823 | 0.0043 | 0.06351 | 0.00056 | 0.61732  | 400.1  | 3.1 | 396.9  | 3.4  | 424    | 11  | 396.9  | 3.4  | 0.7998   |
| 13GRT01_101.FIN2 | 152.7 | 1.621  | 3.884  | 0.04   | 0.2713  | 0.0026  | 0.82154  | 1609.9 | 8.3 | 1547   | 13   | 1679.1 | 7   | 1679.1 | 7    | 7.86731  |
| 13GRT01_102.FIN2 | 83.3  | 1.627  | 1.821  | 0.017  | 0.1788  | 0.0012  | 0.51622  | 1052.5 | 6.1 | 1060.5 | 6.8  | 1038.1 | 9.1 | 1060.5 | 6.8  | 0.760095 |
| 13GRT01_103.FIN2 | 212.8 | 1.625  | 0.1051 | 0.0017 | 0.0162  | 0.00017 | 0.25756  | 101.4  | 1.6 | 103.6  | 1.1  | 116    | 25  | 103.6  | 1.1  | 2.169625 |
| 13GRT01_104.FIN2 | 199.8 | 1.181  | 0.1061 | 0.002  | 0.01594 | 0.00016 | 0.12792  | 102.4  | 1.8 | 102    | 1    | 168    | 30  | 102    | 1    | 0.390625 |
| 13GRT01_105.FIN2 | 77.1  | 1.918  | 3.052  | 0.028  | 0.2459  | 0.0024  | 0.75047  | 1420.4 | 7.1 | 1417   | 12   | 1423.3 | 9.1 | 1423.3 | 9.1  | 0.442633 |
| 13GRT01_106.FIN2 | 384   | 2.99   | 0.2242 | 0.0026 | 0.03233 | 0.00027 | 0.043086 | 205.3  | 2.1 | 205.1  | 1.7  | 210    | 15  | 205.1  | 1.7  | 0.097418 |
| 13GRT01_107.FIN2 | 354   | 1.583  | 0.1031 | 0.0018 | 0.01571 | 0.00021 | 0.4103   | 99.6   | 1.7 | 100.5  | 1.3  | 112    | 20  | 100.5  | 1.3  | 0.903614 |
| 13GRT01_108.FIN2 | 490   | 1.6    | 0.0956 | 0.0021 | 0.01395 | 0.00026 | 0.708    | 92.7   | 1.9 | 89.3   | 1.7  | 176    | 17  | 89.3   | 1.7  | 3.667745 |
| 13GRT01_109.FIN2 | 154.9 | 1.747  | 4.083  | 0.026  | 0.2916  | 0.0027  | 0.20351  | 1651.4 | 5   | 1649   | 13   | 1647.2 | 8.2 | 1647.2 | 8.2  | 0.109276 |
| 13GRT01_110.FIN2 | 123.6 | 2.362  | 1.786  | 0.012  | 0.1767  | 0.0012  | 0.39863  | 1041   | 4.6 | 1048.6 | 6.6  | 1027.4 | 8.7 | 1048.6 | 6.6  | 0.730067 |
| 13GRT01_111.FIN2 | 159   | 1.246  | 0.8202 | 0.0095 | 0.09798 | 0.00091 | 0.34915  | 607.9  | 5.3 | 602.5  | 5.4  | 616    | 15  | 602.5  | 5.4  | 0.888304 |
| 13GRT01_112.FIN2 | 20.5  | 1.89   | 13     | 0.13   | 0.5093  | 0.0057  | 0.64514  | 2678.5 | 9.7 | 2653   | 24   | 2685   | 13  | 2685   | 13   | 1.191806 |
| 13GRT01_113.FIN2 | 164.9 | 1.269  | 4.645  | 0.039  | 0.3152  | 0.0027  | 0.84351  | 1757   | 6.9 | 1766   | 13   | 1745.5 | 5.5 | 1745.5 | 5.5  | 1.174449 |
| 13GRT01_114.FIN2 | 382   | 1.45   | 4.294  | 0.03   | 0.3045  | 0.0024  | 0.83178  | 1691.9 | 5.8 | 1714   | 12   | 1665.5 | 5.3 | 1665.5 | 5.3  | 2.912038 |
| 13GRT01_115.FIN2 | 215.6 | 1.493  | 5.577  | 0.051  | 0.3424  | 0.003   | 0.94649  | 1912   | 8.1 | 1898   | 15   | 1927.1 | 5.5 | 1927.1 | 5.5  | 1.510041 |
| 13GRT01_116.FIN2 | 159.8 | 1.553  | 2.877  | 0.014  | 0.2366  | 0.0015  | 0.71569  | 1375.9 | 3.8 | 1369   | 7.9  | 1388.4 | 5.5 | 1388.4 | 5.5  | 1.397292 |
| 13GRT01_117.FIN2 | 59.2  | 1.049  | 2.558  | 0.022  | 0.2214  | 0.0021  | 0.55822  | 1289.3 | 6.4 | 1289   | 11   | 1298   | 10  | 1298   | 10   | 0.693374 |
| 13GRT01_118.FIN2 | 381   | 1.08   | 0.0925 | 0.0019 | 0.01386 | 0.00014 | 0.36277  | 89.8   | 1.8 | 88.75  | 0.88 | 137    | 27  | 88.75  | 0.88 | 1.169265 |
| 13GRT01_119.FIN2 | 70.5  | 1.263  | 1.888  | 0.026  | 0.1827  | 0.0019  | 0.72575  | 1077.2 | 9   | 1081   | 10   | 1063   | 13  | 1081   | 10   | 0.352766 |
| 13GRT01_120.FIN2 | 163   | 1.911  | 4.997  | 0.044  | 0.3331  | 0.0029  | 0.72633  | 1819.3 | 7.3 | 1855   | 14   | 1778.4 | 7.7 | 1778.4 | 7.7  | 4.307242 |

|                 |       |        |        |        |         |         |         |        |     |        |      |        |     |        |      |           |
|-----------------|-------|--------|--------|--------|---------|---------|---------|--------|-----|--------|------|--------|-----|--------|------|-----------|
| 13GRT02_1.FIN2  | 270   | 0.905  | 0.1053 | 0.0019 | 0.0158  | 0.00014 | 0.76697 | 101.6  | 1.7 | 101.06 | 0.92 | 144    | 22  | 101.06 | 0.92 | 0.531496  |
| 13GRT02_2.FIN2  | 60.8  | 1.84   | 3.902  | 0.053  | 0.2833  | 0.0036  | 0.85292 | 1613   | 11  | 1608   | 18   | 1611   | 7.8 | 1611   | 7.8  | 0.18622   |
| 13GRT02_3.FIN2  | 77.1  | 1.159  | 5.259  | 0.034  | 0.3405  | 0.0025  | 0.83254 | 1862.6 | 5.5 | 1889   | 12   | 1827.7 | 6.1 | 1827.7 | 6.1  | 3.353942  |
| 13GRT02_4.FIN2  | 53.1  | 0.505  | 4.863  | 0.063  | 0.316   | 0.0052  | 0.97454 | 1795   | 11  | 1773   | 25   | 1827   | 12  | 1827   | 12   | 2.955665  |
| 13GRT02_5.FIN2  | 61.7  | 1.376  | 1.195  | 0.016  | 0.1309  | 0.0017  | 0.8634  | 797.8  | 7.6 | 792.9  | 9.4  | 801    | 13  | 792.9  | 9.4  | 0.614189  |
| 13GRT02_6.FIN2  | 77.4  | 0.379  | 1.886  | 0.026  | 0.1845  | 0.0021  | 0.85547 | 1075.4 | 9   | 1091   | 12   | 1017   | 11  | 1091   | 12   | 1.450623  |
| 13GRT02_7.FIN2  | 149.1 | 1.524  | 3.414  | 0.024  | 0.2706  | 0.002   | 0.82253 | 1507.3 | 5.6 | 1543.9 | 9.9  | 1455.6 | 7.6 | 1455.6 | 7.6  | 6.066227  |
| 13GRT02_9.FIN2  | 37.7  | 1.053  | 1.993  | 0.026  | 0.1924  | 0.0017  | 0.74536 | 1114.8 | 9.3 | 1134.3 | 9.4  | 1063   | 17  | 1134.3 | 9.4  | 1.749193  |
| 13GRT02_11.FIN2 | 42.5  | 0.834  | 5.45   | 0.13   | 0.3437  | 0.0059  | 0.7941  | 1892   | 21  | 1904   | 28   | 1877   | 18  | 1877   | 18   | 1.438466  |
| 13GRT02_12.FIN2 | 97.6  | 0.6092 | 4.774  | 0.038  | 0.3216  | 0.0025  | 0.79076 | 1780.1 | 6.7 | 1797   | 12   | 1763.4 | 6.3 | 1763.4 | 6.3  | 1.90541   |
| 13GRT02_13.FIN2 | 165   | 1.544  | 1.965  | 0.021  | 0.1897  | 0.0019  | 0.84857 | 1103.1 | 7   | 1120   | 10   | 1055   | 12  | 1120   | 10   | 1.532046  |
| 13GRT02_14.FIN2 | 184   | 0.64   | 0.758  | 0.01   | 0.09418 | 0.0009  | 0.78621 | 572.4  | 5.8 | 580.2  | 5.3  | 540    | 15  | 580.2  | 5.3  | 1.362283  |
| 13GRT02_15.FIN2 | 36.1  | 0.72   | 1.684  | 0.02   | 0.1699  | 0.0019  | 0.76187 | 1002   | 7.4 | 1011   | 11   | 978    | 19  | 1011   | 11   | 0.898204  |
| 13GRT02_16.FIN2 | 70.1  | 1.26   | 5.918  | 0.047  | 0.3636  | 0.0032  | 0.9132  | 1963.5 | 7   | 1999   | 15   | 1918.8 | 9.2 | 1918.8 | 9.2  | 4.179696  |
| 13GRT02_17.FIN2 | 45.35 | 0.895  | 12.2   | 0.11   | 0.5227  | 0.0041  | 0.95455 | 2620.8 | 8.1 | 2710   | 18   | 2552.4 | 5.7 | 2552.4 | 5.7  | 6.174581  |
| 13GRT02_18.FIN2 | 315.2 | 1.854  | 10.99  | 0.13   | 0.4223  | 0.0056  | 0.85008 | 2522   | 11  | 2537   | 24   | 2509.9 | 9.2 | 2509.9 | 9.2  | 10.709724 |
| 13GRT02_19.FIN2 | 403   | 6.852  | 2.544  | 0.021  | 0.2844  | 0.0019  | 0.81319 | 1284.3 | 5.9 | 1305   | 10   | 1252.1 | 7.5 | 1252.1 | 7.5  | 4.224902  |
| 13GRT02_20.FIN2 | 29.8  | 0.848  | 2.216  | 0.026  | 0.2059  | 0.0026  | 0.90061 | 1185.5 | 8.1 | 1208   | 13   | 1138   | 18  | 1138   | 13   | 1.897933  |
| 13GRT02_21.FIN2 | 72.9  | 2.2    | 2.039  | 0.035  | 0.1945  | 0.0028  | 0.80034 | 1132   | 12  | 1146   | 15   | 1102   | 16  | 1146   | 15   | 1.236749  |
| 13GRT02_22.FIN2 | 239.4 | 0.789  | 1.921  | 0.015  | 0.1852  | 0.0014  | 0.67807 | 1088.7 | 5.2 | 1095.1 | 7.8  | 1067.2 | 7   | 1095.1 | 7.8  | 0.587857  |
| 13GRT02_23.FIN2 | 370   | 2.64   | 0.8915 | 0.008  | 0.1058  | 0.001   | 0.80594 | 647    | 4.3 | 648.2  | 6.1  | 645    | 11  | 648.2  | 6.1  | 0.185471  |
| 13GRT02_24.FIN2 | 42.9  | 0.939  | 5.785  | 0.067  | 0.3598  | 0.004   | 0.94664 | 1943   | 10  | 1981   | 19   | 1891.9 | 8.6 | 1891.9 | 8.6  | 4.709551  |
| 13GRT02_25.FIN2 | 78.8  | 1.757  | 6.569  | 0.058  | 0.3777  | 0.004   | 0.92314 | 2055.7 | 7.6 | 2065   | 19   | 2042.1 | 8.9 | 2042.1 | 8.9  | 1.121395  |
| 13GRT02_26.FIN2 | 187.6 | 0.808  | 14.071 | 0.096  | 0.5413  | 0.0045  | 0.88621 | 2754.2 | 6.4 | 2789   | 19   | 2731.3 | 7   | 2731.3 | 7    | 2.112547  |
| 13GRT02_27.FIN2 | 175.9 | 1.902  | 0.0983 | 0.002  | 0.01524 | 0.00017 | 0.72862 | 95.2   | 1.8 | 97.5   | 1.1  | 111    | 24  | 97.5   | 1.1  | 2.415966  |
| 13GRT02_28.FIN2 | 102.2 | 1.095  | 1.063  | 0.076  | 0.1493  | 0.0024  | 0.97517 | 1033   | 28  | 897    | 13   | 1347   | 77  | 897    | 13   | 1.316554  |
| 13GRT02_29.FIN2 | 44    | 0.688  | 5.601  | 0.058  | 0.3471  | 0.0029  | 0.87449 | 1915.6 | 8.9 | 1921   | 14   | 1907   | 11  | 1907   | 11   | 0.734137  |
| 13GRT02_30.FIN2 | 44.1  | 1.045  | 4.411  | 0.044  | 0.3088  | 0.003   | 0.92679 | 1713.9 | 8.2 | 1735   | 15   | 1679   | 9.1 | 1679   | 9.1  | 3.335319  |
| 13GRT02_31.FIN2 | 369   | 2.131  | 0.5196 | 0.0067 | 0.06711 | 0.00097 | 0.87408 | 424.7  | 4.5 | 418.7  | 5.9  | 465    | 15  | 418.7  | 5.9  | 1.412762  |
| 13GRT02_32.FIN2 | 151   | 1.395  | 2.086  | 0.02   | 0.1975  | 0.0017  | 0.84022 | 1144.8 | 6.5 | 1163.3 | 9.4  | 1100.4 | 9.1 | 1163.3 | 9.4  | 1.616003  |
| 13GRT02_33.FIN2 | 34.4  | 0.782  | 0.87   | 0.017  | 0.1021  | 0.0015  | 0.86399 | 635.7  | 9.3 | 626.4  | 9    | 656    | 25  | 626.4  | 9    | 1.462594  |
| 13GRT02_34.FIN2 | 52.6  | 0.793  | 5.466  | 0.052  | 0.3539  | 0.0038  | 0.91683 | 1896.8 | 8.5 | 1952   | 18   | 1835   | 10  | 1835   | 10   | 6.376022  |
| 13GRT02_35.FIN2 | 83.6  | 1.373  | 4.096  | 0.039  | 0.2911  | 0.0025  | 0.80682 | 1653   | 7.9 | 1647   | 13   | 1643   | 11  | 1643   | 11   | 0.23435   |

|                  |       |        |        |        |         |         |         |        |     |        |      |        |     |        |      |          |
|------------------|-------|--------|--------|--------|---------|---------|---------|--------|-----|--------|------|--------|-----|--------|------|----------|
| 13GRT02_36.FIN2  | 127.2 | 1.04   | 1.873  | 0.019  | 0.1809  | 0.0017  | 0.83514 | 1071.3 | 6.6 | 1071.9 | 9.4  | 1067.6 | 8.7 | 1071.9 | 9.4  | 0.056007 |
| 13GRT02_37.FIN2  | 129   | 1.904  | 1.808  | 0.018  | 0.1779  | 0.0016  | 0.74632 | 1049   | 6.2 | 1055.6 | 8.8  | 1027.4 | 9   | 1055.6 | 8.8  | 0.629171 |
| 13GRT02_38.FIN2  | 65.2  | 1.333  | 1.876  | 0.02   | 0.1816  | 0.0018  | 0.81417 | 1072.2 | 7   | 1075.5 | 9.7  | 1065   | 13  | 1075.5 | 9.7  | 0.307778 |
| 13GRT02_39.FIN2  | 175.2 | 1.947  | 2.09   | 0.014  | 0.1978  | 0.0015  | 0.92663 | 1146.1 | 4.4 | 1163.3 | 7.8  | 1115.6 | 8.1 | 1163.3 | 7.8  | 1.500742 |
| 13GRT02_40.FIN2  | 21.61 | 2.568  | 5.172  | 0.053  | 0.3289  | 0.0029  | 0.85943 | 1848.4 | 8.5 | 1833   | 14   | 1875   | 13  | 1875   | 13   | 2.24     |
| 13GRT02_41.FIN2  | 69.2  | 0.5827 | 10.153 | 0.066  | 0.4741  | 0.0034  | 0.91934 | 2448.5 | 6   | 2501   | 15   | 2409.5 | 5.9 | 2409.5 | 5.9  | 3.797468 |
| 13GRT02_42.FIN2  | 106.5 | 1.195  | 6.045  | 0.055  | 0.3726  | 0.0035  | 0.9685  | 1981.8 | 7.9 | 2041   | 17   | 1918.4 | 8.2 | 1918.4 | 8.2  | 6.390742 |
| 13GRT02_43.FIN2  | 65.7  | 0.747  | 2.07   | 0.045  | 0.1919  | 0.0055  | 0.97831 | 1141   | 14  | 1131   | 30   | 1130   | 20  | 1131   | 30   | 0.876424 |
| 13GRT02_44.FIN2  | 62.4  | 0.685  | 2.847  | 0.083  | 0.1719  | 0.0026  | 0.99767 | 1366   | 22  | 1023   | 14   | 1927   | 69  | 1023   | 14   | 25.10981 |
| 13GRT02_45.FIN2  | 370   | 1.58   | 1.849  | 0.014  | 0.1818  | 0.0015  | 0.73369 | 1062.7 | 5.2 | 1076.6 | 8.3  | 1040   | 8.9 | 1076.6 | 8.3  | 1.307989 |
| 13GRT02_46.FIN2  | 36    | 0.523  | 1.826  | 0.025  | 0.176   | 0.0017  | 0.72373 | 1054.1 | 9.1 | 1044.7 | 9.4  | 1077   | 17  | 1044.7 | 9.4  | 0.891756 |
| 13GRT02_47.FIN2  | 205.8 | 1.629  | 1.907  | 0.017  | 0.1845  | 0.0016  | 0.70926 | 1083.2 | 5.9 | 1091.2 | 8.7  | 1087.2 | 9.6 | 1091.2 | 8.7  | 0.738552 |
| 13GRT02_48.FIN2  | 48.1  | 0.771  | 5.253  | 0.052  | 0.3411  | 0.0036  | 0.89507 | 1860.6 | 8.4 | 1892   | 17   | 1832   | 11  | 1832   | 11   | 3.275109 |
| 13GRT02_49.FIN2  | 111.1 | 1.099  | 2.029  | 0.015  | 0.196   | 0.0015  | 0.82864 | 1125.2 | 5.2 | 1153.7 | 8.2  | 1073.6 | 8.6 | 1153.7 | 8.2  | 2.532883 |
| 13GRT02_50.FIN2  | 82.1  | 0.7628 | 4.549  | 0.032  | 0.3159  | 0.0023  | 0.79821 | 1739.8 | 5.9 | 1770   | 11   | 1707.7 | 6.1 | 1707.7 | 6.1  | 3.648182 |
| 13GRT02_51.FIN2  | 10.51 | 0.898  | 0.738  | 0.026  | 0.0916  | 0.0021  | 0.96753 | 563    | 15  | 565    | 13   | 534    | 53  | 565    | 13   | 0.35524  |
| 13GRT02_52.FIN2  | 278   | 1.071  | 0.55   | 0.15   | 0.0205  | 0.0013  | 0.87139 | 374    | 84  | 130.7  | 8.4  | 1940   | 370 | DISC   | DISC | 65.05348 |
| 13GRT02_53.FIN2  | 134.2 | 2.13   | 5.376  | 0.044  | 0.3464  | 0.003   | 0.90565 | 1881.5 | 7.2 | 1919   | 14   | 1841   | 10  | 1841   | 10   | 4.236828 |
| 13GRT02_54.FIN2  | 161   | 1.237  | 4.803  | 0.045  | 0.3211  | 0.0028  | 0.81835 | 1785.9 | 7.7 | 1795   | 13   | 1774.1 | 8.1 | 1774.1 | 8.1  | 1.178062 |
| 13GRT02_55.FIN2  | 24.32 | 1.08   | 2.644  | 0.043  | 0.2254  | 0.0031  | 0.89052 | 1314   | 12  | 1310   | 16   | 1330   | 13  | 1330   | 13   | 1.503759 |
| 13GRT02_56.FIN2  | 52.2  | 0.6806 | 2.555  | 0.025  | 0.2211  | 0.0021  | 0.79825 | 1288.5 | 7.4 | 1287   | 11   | 1294   | 11  | 1294   | 11   | 0.540958 |
| 13GRT02_57.FIN2  | 460   | 2.045  | 0.1059 | 0.0016 | 0.01626 | 0.00019 | 0.67735 | 102.2  | 1.5 | 104    | 1.2  | 138    | 26  | 104    | 1.2  | 1.761252 |
| 13GRT02_58.FIN2  | 134.9 | 1.944  | 4.161  | 0.035  | 0.2989  | 0.0025  | 0.82157 | 1666.8 | 6.9 | 1686   | 12   | 1643.4 | 7.2 | 1643.4 | 7.2  | 2.592187 |
| 13GRT02_59.FIN2  | 62.6  | 0.693  | 3.123  | 0.034  | 0.2511  | 0.0034  | 0.98507 | 1437.7 | 8.4 | 1444   | 18   | 1426   | 14  | 1426   | 14   | 1.262272 |
| 13GRT02_60.FIN2  | 90.3  | 0.376  | 4.338  | 0.035  | 0.3037  | 0.0026  | 0.77269 | 1700.1 | 6.6 | 1709   | 13   | 1689.4 | 5.7 | 1689.4 | 5.7  | 1.160175 |
| 13GRT02_61.FIN2  | 118   | 1.2    | 3.234  | 0.044  | 0.2501  | 0.0031  | 0.93515 | 1467   | 10  | 1439   | 16   | 1507.4 | 9.6 | 1507.4 | 9.6  | 4.537614 |
| 13GRT02_62.FIN2  | 98.9  | 0.8305 | 4.997  | 0.03   | 0.327   | 0.0021  | 0.65065 | 1818.5 | 5.1 | 1824   | 10   | 1818.3 | 7.3 | 1818.3 | 7.3  | 0.31348  |
| 13GRT02_63.FIN2  | 42.6  | 0.928  | 1.879  | 0.028  | 0.1831  | 0.0019  | 0.82168 | 1073   | 10  | 1084   | 11   | 1064   | 19  | 1084   | 11   | 1.025163 |
| 13GRT02_64.FIN2  | 47.2  | 1.051  | 1.77   | 0.019  | 0.1789  | 0.0016  | 0.78327 | 1034.3 | 7   | 1060.7 | 8.8  | 1000   | 14  | 1060.7 | 8.8  | 2.552451 |
| 13GRT02_65.FIN2  | 274   | 1.585  | 1.93   | 0.012  | 0.1864  | 0.0012  | 0.61967 | 1091.4 | 4.2 | 1101.6 | 6.6  | 1072.1 | 7.8 | 1101.6 | 6.6  | 0.934579 |
| 13GRT02_66.FIN2  | 39.2  | 1.33   | 2.704  | 0.037  | 0.231   | 0.0021  | 0.90677 | 1330.2 | 9.6 | 1340   | 11   | 1301   | 14  | 1301   | 14   | 2.997694 |
| 13GRT02_67.FIN2  | 32.6  | 2.007  | 15.28  | 0.11   | 0.5651  | 0.0054  | 0.97266 | 2833.7 | 6.8 | 2887   | 22   | 2804.9 | 7.3 | 2804.9 | 7.3  | 2.927021 |
| 13GRT02_68.FIN2  | 19.92 | 0.78   | 0.581  | 0.016  | 0.0727  | 0.0016  | 0.96617 | 466    | 10  | 452.2  | 9.8  | 530    | 31  | 452.2  | 9.8  | 2.961373 |
| 13GRT02_69.FIN2  | 106   | 1.006  | 1.998  | 0.017  | 0.1913  | 0.0016  | 0.7478  | 1114.7 | 5.7 | 1128.2 | 8.7  | 1100   | 10  | 1128.2 | 8.7  | 1.211088 |
| 13GRT02_70.FIN2  | 87.1  | 2.42   | 0.622  | 0.012  | 0.0813  | 0.001   | 0.78232 | 490.5  | 7.2 | 504    | 6.1  | 442    | 23  | 504    | 6.1  | 2.752294 |
| 13GRT02_71.FIN2  | 181   | 1.105  | 3.52   | 0.027  | 0.2735  | 0.0023  | 0.84054 | 1531.5 | 6   | 1558   | 12   | 1491   | 9.8 | 1491   | 9.8  | 4.493628 |
| 13GRT02_72.FIN2  | 20.79 | 0.5906 | 20.56  | 0.2    | 0.6147  | 0.0076  | 0.96964 | 3117.4 | 9.3 | 3088   | 30   | 3147.1 | 8.8 | 3147.1 | 8.8  | 1.877919 |
| 13GRT02_73.FIN2  | 130.2 | 0.621  | 5.287  | 0.034  | 0.3399  | 0.0019  | 0.78909 | 1866.4 | 5.5 | 1886.2 | 9    | 1850   | 6   | 1850   | 6    | 1.956757 |
| 13GRT02_74.FIN2  | 77.3  | 1.357  | 5.457  | 0.047  | 0.3435  | 0.0023  | 0.76262 | 1893.4 | 7.5 | 1905   | 11   | 1887.5 | 8.2 | 1887.5 | 8.2  | 0.927152 |
| 13GRT02_75.FIN2  | 46.2  | 0.81   | 2.285  | 0.032  | 0.202   | 0.0028  | 0.91399 | 1207   | 10  | 1186   | 15   | 1240   | 16  | 1186   | 15   | 1.739851 |
| 13GRT02_76.FIN2  | 190   | 1.109  | 3.226  | 0.025  | 0.2567  | 0.0023  | 0.83312 | 1463.1 | 6   | 1473   | 12   | 1451.8 | 7   | 1451.8 | 7    | 1.460256 |
| 13GRT02_77.FIN2  | 101.6 | 1.047  | 4.978  | 0.032  | 0.3283  | 0.0023  | 0.77069 | 1816.1 | 5.5 | 1830   | 11   | 1797.1 | 8.3 | 1797.1 | 8.3  | 1.830727 |
| 13GRT02_78.FIN2  | 42.83 | 0.4426 | 5.972  | 0.077  | 0.3643  | 0.0049  | 0.96597 | 1971   | 11  | 2002   | 23   | 1934.9 | 8.8 | 1934.9 | 8.8  | 3.467879 |
| 13GRT02_79.FIN2  | 21.4  | 1.02   | 1.956  | 0.04   | 0.1876  | 0.003   | 0.97376 | 1101   | 14  | 1108   | 16   | 1093   | 18  | 1108   | 16   | 0.635786 |
| 13GRT02_80.FIN2  | 53.7  | 1.068  | 3.999  | 0.034  | 0.2889  | 0.0021  | 0.7952  | 1633.5 | 7   | 1636   | 11   | 1640.9 | 8.7 | 1640.9 | 8.7  | 0.298617 |
| 13GRT02_81.FIN2  | 198.5 | 1.751  | 1.888  | 0.014  | 0.1876  | 0.0013  | 0.75261 | 1076.5 | 5.1 | 1108.4 | 7    | 1018   | 10  | 1108.4 | 7    | 2.963307 |
| 13GRT02_82.FIN2  | 256   | 7.45   | 4.886  | 0.036  | 0.3218  | 0.0033  | 0.9101  | 1800.5 | 6.5 | 1798   | 16   | 1807   | 7.1 | 1807   | 7.1  | 0.498063 |
| 13GRT02_83.FIN2  | 341   | 1.677  | 1.843  | 0.013  | 0.1814  | 0.0016  | 0.78113 | 1060.8 | 4.6 | 1074.3 | 8.6  | 1039.4 | 6.1 | 1074.3 | 8.6  | 1.272624 |
| 13GRT02_84.FIN2  | 49    | 1.141  | 2.813  | 0.031  | 0.2272  | 0.0022  | 0.89135 | 1358.3 | 8.4 | 1320   | 11   | 1412   | 12  | 1412   | 12   | 6.515581 |
| 13GRT02_85.FIN2  | 225.8 | 1.047  | 0.5633 | 0.0085 | 0.07206 | 0.00055 | 0.77324 | 453.4  | 5.5 | 448.6  | 3.3  | 478    | 28  | 448.6  | 3.3  | 1.058668 |
| 13GRT02_86.FIN2  | 69.8  | 0.5977 | 1.059  | 0.013  | 0.1211  | 0.0011  | 0.63142 | 733.1  | 6.3 | 736.9  | 6.1  | 743    | 16  | 736.9  | 6.1  | 0.518347 |
| 13GRT02_87.FIN2  | 69.1  | 1.473  | 1.74   | 0.025  | 0.1721  | 0.0024  | 0.86907 | 1024.2 | 9.5 | 1023   | 13   | 1035   | 10  | 1023   | 13   | 0.117165 |
| 13GRT02_88.FIN2  | 160   | 1.161  | 2.05   | 0.018  | 0.1939  | 0.0018  | 0.85601 | 1132.9 | 5.9 | 1142   | 10   | 1116   | 8.1 | 1142   | 10   | 0.803248 |
| 13GRT02_89.FIN2  | 308   | 2.97   | 1.8665 | 0.0097 | 0.18262 | 0.0008  | 0.5601  | 1070.1 | 3.4 | 1081.3 | 4.3  | 1049.8 | 6.9 | 1081.3 | 4.3  | 1.046631 |
| 13GRT02_90.FIN2  | 8.78  | 0.939  | 1.969  | 0.059  | 0.1823  | 0.0034  | 0.95736 | 1102   | 20  | 1079   | 18   | 1124   | 31  | 1079   | 18   | 2.087114 |
| 13GRT02_92.FIN2  | 377   | 2.81   | 4.53   | 0.027  | 0.3001  | 0.0018  | 0.7937  | 1736.2 | 4.9 | 1691.5 | 9    | 1790.4 | 5.6 | 1790.4 | 5.6  | 5.523905 |
| 13GRT02_93.FIN2  | 277   | 0.8723 | 3.833  | 0.037  | 0.277   | 0.0029  | 0.87014 | 1599.2 | 7.8 | 1576   | 15   | 1634.1 | 6.6 | 1634.1 | 6.6  | 3.555474 |
| 13GRT02_94.FIN2  | 49.1  | 1.637  | 1.731  | 0.02   | 0.1708  | 0.0017  | 0.83074 | 1019.5 | 7.3 | 1016.5 | 9.3  | 1019   | 13  | 1016.5 | 9.3  | 0.294262 |
| 13GRT02_95.FIN2  | 159   | 0.63   | 0.8267 | 0.0091 | 0.0988  | 0.00079 | 0.81191 | 611.5  | 5.1 | 607.3  | 4.6  | 634    | 16  | 607.3  | 4.6  | 0.686836 |
| 13GRT02_96.FIN2  | 24.5  | 1.081  | 4.425  | 0.05   | 0.3093  | 0.0027  | 0.82839 | 1716.3 | 9.4 | 1737   | 13   | 1701   | 13  | 1701   | 13   | 2.116402 |
| 13GRT02_98.FIN2  | 39.6  | 1.227  | 5.737  | 0.057  | 0.3525  | 0.0036  | 0.87491 | 1937.4 | 8.4 | 1946   | 17   | 1926   | 12  | 1926   | 12   | 1.038422 |
| 13GRT02_99.FIN2  | 66    | 1.247  | 2.095  | 0.021  | 0.1959  | 0.0018  | 0.85557 | 1146.8 | 6.9 | 1154.8 | 9.7  | 1135   | 11  | 1154.8 | 9.7  | 0.697593 |
| 13GRT02_100.FIN2 | 77.5  | 1.319  | 5.502  | 0.048  | 0.3418  | 0.0037  | 0.92613 | 1900.5 | 7.5 | 1897   | 18   | 1917   | 11  | 1917   | 11   | 1.043297 |
| 13GRT02_101.FIN2 | 219   | 0.75   | 0.5848 | 0.0067 | 0.0746  | 0.00085 | 0.79678 | 467.4  | 4.3 | 463.8  | 5.1  | 496    | 18  | 463.8  | 5.1  | 0.770218 |
| 13GRT02_102.FIN2 | 310   | 0.9604 | 0.0958 | 0.0018 | 0.01426 | 0.00014 | 0.67811 | 92.8   | 1.7 | 91.3   | 0.91 | 153    | 24  | 91.3   | 0.91 | 1.616379 |
| 13GRT02_103.FIN2 | 97.8  | 0.749  | 2.276  | 0.02   | 0.2079  | 0.0017  | 0.68318 | 1204.6 | 6.1 | 1217.7 | 8.9  | 1182.2 | 8.5 | 1182.2 | 8.9  | 1.087498 |
| 13GRT02_104.FIN2 | 41.2  | 1.478  | 2.781  | 0.032  | 0.2333  | 0.0022  | 0.86946 | 1349.7 | 8.6 | 1352   | 12   | 1360   | 15  | 1360   | 15   | 0.588235 |
| 13GRT02_105.FIN2 | 69.02 | 0.855  | 1.984  | 0.02   | 0.1876  | 0.0015  | 0.72298 | 1109.6 | 6.7 | 1108.1 | 8.2  | 1125   | 11  | 1108.1 | 8.2  | 0.135184 |
| 13GRT02_106.FIN2 | 196.1 | 1.955  | 1.78   | 0.012  | 0.1745  | 0.0013  | 0.70459 | 1037.8 | 4.4 | 1036.9 | 7.1  | 1044.9 | 7.4 | 1036.9 | 7.1  | 0.086722 |
| 13GRT02_107.FIN2 | 151.6 | 1.715  | 0.5668 | 0.007  | 0.07193 | 0.00082 | 0.70943 | 455.7  | 4.6 |        |      |        |     |        |      |          |



|                 |       |        |        |        |         |         |          |        |     |        |      |        |     |        |      |          |
|-----------------|-------|--------|--------|--------|---------|---------|----------|--------|-----|--------|------|--------|-----|--------|------|----------|
| 13GRT03_20.FIN2 | 220.2 | 2.941  | 5.019  | 0.023  | 0.3364  | 0.0017  | 0.67608  | 1822.4 | 3.9 | 1870.3 | 8.3  | 1772.7 | 4.3 | 1772.7 | 4.3  | 5.505726 |
| 13GRT03_21.FIN2 | 182   | 2.219  | 4.384  | 0.032  | 0.3001  | 0.0021  | 0.85538  | 1709.8 | 6.2 | 1693   | 11   | 1735.7 | 5.3 | 1735.7 | 5.3  | 2.460103 |
| 13GRT03_22.FIN2 | 109.9 | 1.536  | 1.84   | 0.011  | 0.1821  | 0.001   | 0.29338  | 1059.7 | 3.9 | 1078.2 | 5.7  | 1027.6 | 8.4 | 1078.2 | 5.7  | 1.745777 |
| 13GRT03_23.FIN2 | 112   | 1.991  | 0.1064 | 0.0025 | 0.01591 | 0.00019 | 0.10124  | 102.6  | 2.3 | 101.7  | 1.2  | 187    | 37  | 101.7  | 1.2  | 0.877193 |
| 13GRT03_24.FIN2 | 673   | 65.5   | 3.049  | 0.067  | 0.2073  | 0.004   | 0.9679   | 1418   | 17  | 1214   | 21   | 1747.4 | 7.3 | DISC   | DISC | 30.52535 |
| 13GRT03_25.FIN2 | 62.4  | 0.4455 | 13.668 | 0.077  | 0.5293  | 0.0034  | 0.58486  | 2726.8 | 5.3 | 2738   | 14   | 2731.9 | 5.8 | 2731.9 | 5.8  | 0.223288 |
| 13GRT03_26.FIN2 | 11.13 | 0.694  | 1.775  | 0.037  | 0.1692  | 0.0021  | 0.36627  | 1035   | 13  | 1007   | 12   | 1103   | 22  | 1007   | 12   | 2.705314 |
| 13GRT03_27.FIN2 | 553   | 5.18   | 1.394  | 0.019  | 0.1442  | 0.0018  | 0.78423  | 887.9  | 7.6 | 868    | 10   | 948.2  | 9.7 | 868    | 10   | 2.241243 |
| 13GRT03_28.FIN2 | 407   | 2.89   | 3.168  | 0.047  | 0.2543  | 0.0039  | 0.89204  | 1449   | 11  | 1460   | 20   | 1440.2 | 7.9 | 1440.2 | 7.9  | 1.374809 |
| 13GRT03_29.FIN2 | 110.4 | 1.85   | 4.485  | 0.034  | 0.3114  | 0.0025  | 0.71219  | 1728.7 | 6.1 | 1747   | 12   | 1714.3 | 7.3 | 1714.3 | 7.3  | 1.907484 |
| 13GRT03_30.FIN2 | 191.7 | 1.462  | 0.1119 | 0.0036 | 0.01586 | 0.00017 | 0.38358  | 107.6  | 3.2 | 101.4  | 1.1  | 296    | 59  | 101.4  | 1.1  | 5.762082 |
| 13GRT03_31.FIN2 | 127   | 1.431  | 3.216  | 0.033  | 0.2615  | 0.0029  | 0.81277  | 1461.4 | 7.9 | 1497   | 15   | 1410.9 | 6.6 | 1410.9 | 6.6  | 6.102488 |
| 13GRT03_32.FIN2 | 489   | 1.702  | 0.3199 | 0.0024 | 0.04446 | 0.00029 | 0.4527   | 281.8  | 1.8 | 280.4  | 1.8  | 307    | 11  | 280.4  | 1.8  | 0.496806 |
| 13GRT03_33.FIN2 | 213   | 0.94   | 2.013  | 0.015  | 0.1911  | 0.0015  | 0.71125  | 1119.7 | 5.2 | 1127.5 | 7.9  | 1108.7 | 7.3 | 1127.5 | 7.9  | 0.696615 |
| 13GRT03_34.FIN2 | 71.3  | 1.795  | 1.581  | 0.017  | 0.1617  | 0.0013  | 0.39295  | 962.3  | 6.9 | 966.3  | 7.1  | 961    | 11  | 966.3  | 7.1  | 0.415671 |
| 13GRT03_35.FIN2 | 12.94 | 0.79   | 1.757  | 0.036  | 0.1736  | 0.0026  | 0.26653  | 1028   | 13  | 1031   | 14   | 1023   | 28  | 1031   | 14   | 0.291829 |
| 13GRT03_36.FIN2 | 90.1  | 2.376  | 0.5666 | 0.0076 | 0.07333 | 0.00077 | 0.24953  | 455.6  | 4.9 | 456.2  | 4.6  | 461    | 20  | 456.2  | 4.6  | 0.131694 |
| 13GRT03_37.FIN2 | 89.9  | 1.707  | 1.535  | 0.016  | 0.1569  | 0.0013  | 0.5698   | 944.4  | 6.5 | 939.6  | 7.4  | 961    | 11  | 939.6  | 7.4  | 0.508259 |
| 13GRT03_38.FIN2 | 175   | 2.15   | 4.456  | 0.054  | 0.2964  | 0.0038  | 0.91896  | 1723   | 10  | 1673   | 19   | 1787.5 | 5.8 | 1787.5 | 5.8  | 6.405594 |
| 13GRT03_39.FIN2 | 387   | 4.11   | 2.92   | 0.021  | 0.2397  | 0.0021  | 0.83046  | 1386.9 | 5.3 | 1385   | 11   | 1396   | 5.8 | 1396   | 5.8  | 0.787966 |
| 13GRT03_40.FIN2 | 90.2  | 0.4531 | 4.013  | 0.032  | 0.2893  | 0.002   | 0.75873  | 1636.4 | 6.5 | 1638   | 10   | 1638.3 | 7.3 | 1638.3 | 7.3  | 0.018312 |
| 13GRT03_41.FIN2 | 231.3 | 2.289  | 2.92   | 0.016  | 0.2328  | 0.0014  | 0.57116  | 1386.8 | 4.2 | 1349.1 | 7.1  | 1438.9 | 5.4 | 1438.9 | 5.4  | 6.240878 |
| 13GRT03_42.FIN2 | 153.6 | 1.045  | 0.1133 | 0.0031 | 0.017   | 0.00019 | 0.006982 | 108.2  | 2.5 | 108.7  | 1.2  | 201    | 40  | 108.7  | 1.2  | 0.462107 |
| 13GRT03_43.FIN2 | 311   | 1.102  | 0.1333 | 0.007  | 0.01567 | 0.00026 | 0.55079  | 126.7  | 6.2 | 100.2  | 1.6  | 629    | 89  | 100.2  | 1.6  | 20.91555 |
| 13GRT03_44.FIN2 | 51.1  | 1.04   | 1.171  | 0.011  | 0.1297  | 0.0012  | 0.10811  | 786.6  | 5.3 | 786    | 6.7  | 798    | 13  | 786    | 6.7  | 0.076278 |
| 13GRT03_45.FIN2 | 188   | 0.965  | 0.1851 | 0.0029 | 0.02715 | 0.00027 | 0.30341  | 172.4  | 2.5 | 172.7  | 1.7  | 172    | 20  | 172.7  | 1.7  | 0.174014 |
| 13GRT03_46.FIN2 | 112.4 | 1.094  | 2.74   | 0.022  | 0.2336  | 0.0015  | 0.93282  | 1339   | 6   | 1353   | 8.1  | 1313.9 | 7.2 | 1313.9 | 7.2  | 2.975873 |
| 13GRT03_47.FIN2 | 23.7  | 1.783  | 15.47  | 0.11   | 0.5577  | 0.0046  | 0.72706  | 2844.9 | 7.2 | 2857   | 19   | 2834.9 | 7.7 | 2834.9 | 7.7  | 0.779569 |
| 13GRT03_48.FIN2 | 81.8  | 1.869  | 2.609  | 0.02   | 0.2285  | 0.0014  | 0.50941  | 1303.7 | 5.5 | 1326.3 | 7.6  | 1262   | 8.5 | 1262   | 8.5  | 5.095807 |
| 13GRT03_49.FIN2 | 287.7 | 1.874  | 1.99   | 0.011  | 0.189   | 0.0011  | 0.66177  | 1112.1 | 3.7 | 1116.7 | 5.9  | 1100.9 | 5.4 | 1116.7 | 5.9  | 0.413632 |
| 13GRT03_50.FIN2 | 198.6 | 2.386  | 3.146  | 0.024  | 0.2515  | 0.0017  | 0.69704  | 1443.8 | 5.9 | 1446.3 | 8.8  | 1444.5 | 7.8 | 1444.5 | 7.8  | 0.124611 |
| 13GRT03_51.FIN2 | 213   | 1.631  | 0.0995 | 0.0021 | 0.01542 | 0.00014 | 0.056378 | 96.3   | 1.9 | 98.67  | 0.92 | 130    | 21  | 98.67  | 0.92 | 2.461059 |
| 13GRT03_52.FIN2 | 96.2  | 1.961  | 1.699  | 0.016  | 0.1671  | 0.0012  | 0.46397  | 1007.7 | 6.2 | 996.2  | 6.9  | 1029   | 11  | 996.2  | 6.9  | 1.141213 |
| 13GRT03_53.FIN2 | 166   | 1.605  | 1.956  | 0.013  | 0.1857  | 0.0011  | 0.37443  | 1100.4 | 4.6 | 1098.2 | 6.1  | 1106.5 | 8.9 | 1098.2 | 6.1  | 0.199927 |
| 13GRT03_54.FIN2 | 127.5 | 1.834  | 1.811  | 0.016  | 0.176   | 0.0013  | 0.73339  | 1049.2 | 5.6 | 1045.2 | 7.2  | 1068.1 | 9.3 | 1045.2 | 7.2  | 0.381243 |
| 13GRT03_55.FIN2 | 229   | 3.77   | 0.4829 | 0.0051 | 0.0638  | 0.00051 | 0.48125  | 400.4  | 3.5 | 398.7  | 3.1  | 398    | 13  | 398.7  | 3.1  | 0.424575 |
| 13GRT03_56.FIN2 | 454   | 1.214  | 0.112  | 0.0043 | 0.01494 | 0.00017 | 0.21969  | 107.6  | 3.8 | 95.6   | 1.1  | 359    | 67  | 95.6   | 1.1  | 11.15242 |
| 13GRT03_57.FIN2 | 39.4  | 0.895  | 1.129  | 0.013  | 0.1263  | 0.001   | 0.11526  | 767.6  | 5.9 | 766.6  | 6    | 760    | 19  | 766.6  | 6    | 0.130276 |
| 13GRT03_58.FIN2 | 37.1  | 2.334  | 4.975  | 0.063  | 0.3037  | 0.0036  | 0.80615  | 1814   | 11  | 1709   | 18   | 1934   | 7.5 | 1934   | 7.5  | 11.63392 |
| 13GRT03_59.FIN2 | 43.6  | 1.596  | 13.292 | 0.09   | 0.5296  | 0.0043  | 0.69249  | 2700.2 | 6.4 | 2739   | 18   | 2667.3 | 6.1 | 2667.3 | 6.1  | 2.688812 |
| 13GRT03_60.FIN2 | 117   | 1.32   | 1.962  | 0.014  | 0.1901  | 0.0015  | 0.48292  | 1103.2 | 4.8 | 1121.9 | 7.9  | 1065.3 | 8.3 | 1121.9 | 7.9  | 1.695069 |
| 13GRT03_61.FIN2 | 183.3 | 13.28  | 0.769  | 0.016  | 0.0895  | 0.0013  | 0.84767  | 578.4  | 9   | 552.3  | 7.7  | 668    | 17  | 552.3  | 7.7  | 4.512448 |
| 13GRT03_62.FIN2 | 516   | 28     | 1.781  | 0.053  | 0.1744  | 0.004   | 0.93812  | 1038   | 19  | 1036   | 22   | 1051   | 20  | 1036   | 22   | 0.192678 |
| 13GRT03_62.FIN2 | 145   | 4.72   | 2.131  | 0.024  | 0.2015  | 0.0021  | 0.69034  | 1158.6 | 7.7 | 1183   | 11   | 1118   | 12  | 1183   | 11   | 2.10599  |
| 13GRT03_63.FIN2 | 160.4 | 1.078  | 1.68   | 0.041  | 0.1676  | 0.0033  | 0.94285  | 1001   | 15  | 998    | 18   | 1005   | 12  | 998    | 18   | 0.2997   |
| 13GRT03_64.FIN2 | 28.62 | 1.593  | 3.151  | 0.034  | 0.2499  | 0.0028  | 0.44099  | 1444.8 | 8.2 | 1438   | 14   | 1454   | 10  | 1454   | 10   | 1.100413 |
| 13GRT03_65.FIN2 | 73.2  | 1.088  | 0.8267 | 0.0097 | 0.10175 | 0.00085 | 0.40776  | 611.5  | 5.4 | 624.6  | 5    | 575    | 14  | 624.6  | 5    | 2.142273 |
| 13GRT03_66.FIN2 | 108.4 | 3.67   | 0.582  | 0.018  | 0.0719  | 0.0016  | 0.52399  | 464    | 11  | 447.3  | 9.8  | 504    | 22  | 447.3  | 9.8  | 3.599138 |
| 13GRT03_67.FIN2 | 435   | 162.4  | 0.7574 | 0.0045 | 0.09313 | 0.0006  | 0.68352  | 572.4  | 2.6 | 574    | 3.5  | 571.6  | 5.4 | 574    | 3.5  | 0.279525 |
| 13GRT03_68.FIN2 | 130.1 | 1.808  | 2.246  | 0.016  | 0.2068  | 0.0013  | 0.57747  | 1195.3 | 5   | 1211.5 | 6.7  | 1177.5 | 8.7 | 1177.5 | 8.7  | 1.355308 |
| 13GRT03_69.FIN2 | 415   | 13.9   | 0.479  | 0.012  | 0.0629  | 0.0015  | 0.976    | 397    | 8.3 | 393    | 9.4  | 435    | 13  | 393    | 9.4  | 1.007557 |
| 13GRT03_70.FIN2 | 86.2  | 1.62   | 5.234  | 0.038  | 0.3374  | 0.0028  | 0.73819  | 1857.9 | 6.1 | 1874   | 13   | 1841.7 | 5.7 | 1841.7 | 5.7  | 1.753814 |
| 13GRT03_71.FIN2 | 314.4 | 4.16   | 2.331  | 0.013  | 0.2121  | 0.0011  | 0.70611  | 1221.6 | 4.1 | 1239.8 | 6    | 1188.2 | 5.3 | 1188.2 | 6    | 1.489849 |
| 13GRT03_72.FIN2 | 39.3  | 1.1727 | 0.829  | 0.014  | 0.0985  | 0.001   | 0.30202  | 613.8  | 7.6 | 606.1  | 6.1  | 637    | 15  | 606.1  | 6.1  | 1.25448  |
| 13GRT03_73.FIN2 | 381   | 1.114  | 2.222  | 0.014  | 0.205   | 0.0017  | 0.77112  | 1187.9 | 4.5 | 1201.9 | 9    | 1158.6 | 6.2 | 1158.6 | 9    | 1.17855  |
| 13GRT03_74.FIN2 | 142   | 3.037  | 5.589  | 0.041  | 0.3532  | 0.0025  | 0.69605  | 1914   | 6.4 | 1950   | 12   | 1874.8 | 5.8 | 1874.8 | 5.8  | 4.011095 |
| 13GRT03_75.FIN2 | 769   | 17.7   | 3.59   | 0.15   | 0.2164  | 0.0062  | 0.9835   | 1543   | 35  | 1262   | 33   | 1952   | 29  | DISC   | DISC | 35.34836 |
| 13GRT03_75.FIN2 | 95.4  | 1.57   | 7.1    | 0.2    | 0.3329  | 0.006   | 0.92933  | 2129   | 22  | 1852   | 29   | 2381   | 15  | 2381   | 15   | 22.21756 |
| 13GRT03_76.FIN2 | 166   | 1.62   | 5.41   | 0.093  | 0.3401  | 0.0036  | 0.55908  | 1879.7 | 9.4 | 1887   | 17   | 1879   | 15  | 1879   | 15   | 0.425758 |
| 13GRT03_77.FIN2 | 19.99 | 0.5385 | 12.92  | 0.12   | 0.5029  | 0.006   | 0.51693  | 2675   | 8.8 | 2625   | 26   | 2716   | 10  | 2716   | 10   | 3.350515 |
| 13GRT03_78.FIN2 | 58.9  | 1.518  | 1.912  | 0.02   | 0.1823  | 0.0018  | 0.45046  | 1088   | 6.2 | 1079.3 | 9.6  | 1101   | 12  | 1079.3 | 9.6  | 0.799632 |
| 13GRT03_79.FIN2 | 114.2 | 2.389  | 1.732  | 0.015  | 0.1723  | 0.0011  | 0.35779  | 1020.2 | 5.6 | 1024.9 | 6.2  | 1008   | 10  | 1024.9 | 6.2  | 0.460694 |
| 13GRT03_80.FIN2 | 108   | 0.957  | 3.09   | 0.055  | 0.2456  | 0.0048  | 0.96774  | 1423   | 17  | 1415   | 25   | 1431   | 10  | 1431   | 10   | 1.118099 |
| 13GRT03_81.FIN2 | 298   | 2.41   | 1.63   | 0.12   | 0.1443  | 0.0074  | 0.99283  | 961    | 45  | 866    | 42   | 1192   | 43  | 866    | 42   | 9.885536 |
| 13GRT03_82.FIN2 | 32.8  | 2.98   | 1.866  | 0.024  | 0.1736  | 0.0022  | 0.50075  | 1070.8 | 8.8 | 1032   | 12   | 1169   | 18  | 1032   | 12   | 3.623459 |
| 13GRT03_83.FIN2 | 453   | 2.82   | 0.1063 | 0.0051 | 0.01529 | 0.00029 | 0.54903  | 102.4  | 4.6 | 97.8   | 1.9  | 275    | 86  | 97.8   | 1.9  | 4.492188 |
| 13GRT03_84.FIN2 | 124.4 | 1.051  | 4.359  | 0.033  | 0.3073  | 0.0018  | 0.67818  | 1704.2 | 6.2 | 1728.9 | 9.4  | 1672.7 | 5.3 | 1672.7 | 5.3  | 3.359837 |
| 13GRT03_85.FIN2 | 87.3  | 0.841  | 0.5333 | 0.009  | 0.06814 | 0.00084 | 0.097014 | 433.7  | 5.9 | 424.9  | 5.1  | 483    | 35  | 424.9  | 5.1  | 2.029052 |
| 13GRT03_86.FIN2 | 143.2 | 0.784  | 4.729  | 0.056  | 0.3088  | 0.0038  | 0.84531  | 1772.7 | 9.8 | 1734   | 19   | 1826.6 | 8.7 | 1826.6 | 8.7  | 5.069528 |
| 13GRT03_87.FIN2 | 223   | 1.23   | 0.1045 | 0.0019 | 0.01551 | 0.00018 | 0.19142  | 100.9  | 1.8 | 99.2   |      |        |     |        |      |          |

|                  |       |        |       |       |        |        |         |        |     |        |     |        |     |        |     |          |
|------------------|-------|--------|-------|-------|--------|--------|---------|--------|-----|--------|-----|--------|-----|--------|-----|----------|
| 13GRT03_114.FIN2 | 193   | 1.516  | 6.019 | 0.037 | 0.3575 | 0.0028 | 0.70972 | 1979.1 | 5.2 | 1970   | 13  | 1988.4 | 6.3 | 1988.4 | 6.3 | 0.925367 |
| 13GRT03_115.FIN2 | 40.6  | 0.5608 | 13.89 | 0.095 | 0.542  | 0.0039 | 0.6835  | 2741.9 | 6.5 | 2791   | 16  | 2701.1 | 5.4 | 2701.1 | 5.4 | 3.328274 |
| 13GRT03_116.FIN2 | 57.6  | 1.198  | 2.213 | 0.018 | 0.2037 | 0.0016 | 0.2914  | 1185   | 5.6 | 1195.1 | 8.6 | 1166.5 | 9.8 | 1195.1 | 8.6 | 0.852321 |
| 13GRT03_117.FIN2 | 306   | 0.998  | 4.165 | 0.046 | 0.2861 | 0.0037 | 0.77479 | 1667   | 9   | 1622   | 19  | 1725.6 | 8.1 | 1725.6 | 8.1 | 6.003709 |
| 13GRT03_118.FIN2 | 162   | 1.325  | 1.898 | 0.016 | 0.187  | 0.0012 | 0.46242 | 1080.1 | 5.6 | 1105.3 | 6.6 | 1028.9 | 9.8 | 1105.3 | 6.6 | 2.333117 |
| 13GRT03_119.FIN2 | 99    | 1.62   | 1.978 | 0.013 | 0.1886 | 0.0012 | 0.30387 | 1108.3 | 4.5 | 1113.9 | 6.3 | 1094.2 | 7.8 | 1113.9 | 6.3 | 0.505278 |
| 13GRT03_120.FIN2 | 187.4 | 0.6089 | 3.936 | 0.025 | 0.2845 | 0.0016 | 0.32493 | 1621.8 | 4.9 | 1613.7 | 8   | 1631.2 | 5.4 | 1631.2 | 5.4 | 1.07283  |

|                 |       |        |        |        |         |         |          |        |     |        |     |        |          |        |          |          |
|-----------------|-------|--------|--------|--------|---------|---------|----------|--------|-----|--------|-----|--------|----------|--------|----------|----------|
| 13GRT04_1.FIN2  | 207.2 | 1.023  | 0.5135 | 0.0044 | 0.06814 | 0.00041 | 0.37056  | 420.7  | 2.9 | 424.9  | 2.5 | 408    | 11       | 424.9  | 2.5      | 0.998336 |
| 13GRT04_2.FIN2  | 76.8  | 2.356  | 2.181  | 0.039  | 0.2003  | 0.0025  | 0.81331  | 1174   | 12  | 1177   | 14  | 1172   | 13       | 1177   | 14       | 0.255537 |
| 13GRT04_3.FIN2  | 91.1  | 1.801  | 4.489  | 0.032  | 0.3158  | 0.002   | 0.56288  | 1729.5 | 6.2 | 1769.1 | 9.7 | 1690.8 | 7.1      | 1690.8 | 7.1      | 4.630944 |
| 13GRT04_4.FIN2  | 101.5 | 1.504  | 1.863  | 0.016  | 0.1813  | 0.0011  | 0.45408  | 1067.6 | 5.8 | 1073.9 | 6.1 | 1049   | 10       | 1073.9 | 6.1      | 0.590109 |
| 13GRT04_5.FIN2  | 134.1 | 1.91   | 1.881  | 0.016  | 0.182   | 0.0014  | 0.61696  | 1074.3 | 5.7 | 1078.1 | 7.8 | 1066.6 | 8.4      | 1078.1 | 7.8      | 0.353719 |
| 13GRT04_6.FIN2  | 53.2  | 0.985  | 3.265  | 0.027  | 0.259   | 0.002   | 0.82879  | 1472.3 | 6.4 | 1485   | 10  | 1455   | 11       | 1455   | 11       | 2.061856 |
| 13GRT04_7.FIN2  | 61.7  | 2.531  | 11.689 | 0.085  | 0.4905  | 0.0035  | 0.89431  | 2579.4 | 6.9 | 2572   | 15  | 2590.8 | 5.4      | 2590.8 | 5.4      | 0.725645 |
| 13GRT04_8.FIN2  | 97.7  | 1.776  | 0.1258 | 0.0037 | 0.01871 | 0.0003  | 0.026949 | 120.2  | 3.3 | 119.5  | 1.9 | 197    | 35       | 119.5  | 1.9      | 0.582363 |
| 13GRT04_9.FIN2  | 132   | 1.324  | 1.739  | 0.015  | 0.1765  | 0.0013  | 0.49342  | 1023.4 | 5.5 | 1047.7 | 7.3 | 982.7  | 8.8      | 1047.7 | 7.3      | 2.374438 |
| 13GRT04_10.FIN2 | 169   | 1.77   | 1.834  | 0.015  | 0.1749  | 0.0019  | 0.33048  | 1057.3 | 5.5 | 1039   | 10  | 1091   | 14       | 1039   | 10       | 1.730824 |
| 13GRT04_11.FIN2 | 315   | 1.05   | 1.625  | 0.036  | 0.1533  | 0.004   | 0.95515  | 978    | 14  | 919    | 22  | 1123   | 11       | 919    | 22       | 6.03272  |
| 13GRT04_12.FIN2 | 35.5  | 1.762  | 2.262  | 0.028  | 0.2085  | 0.0023  | 0.58449  | 1199.9 | 8.6 | 1221   | 12  | 1168   | 14       | 1168   | 12       | 1.75848  |
| 13GRT04_13.FIN2 | 91.1  | 1.482  | 4.864  | 0.029  | 0.3263  | 0.0019  | 0.6258   | 1795.7 | 5.1 | 1820.3 | 9.4 | 1766.1 | 6.7      | 1766.1 | 6.7      | 3.068909 |
| 13GRT04_14.FIN2 | 126.1 | 1.362  | 0.5051 | 0.0061 | 0.06669 | 0.00048 | 0.421    | 415    | 4.1 | 416.2  | 2.9 | 424    | 17       | 416.2  | 2.9      | 0.289157 |
| 13GRT04_15.FIN2 | 187   | 1.09   | 2.288  | 0.02   | 0.2092  | 0.0019  | 0.7226   | 1208.3 | 6   | 1224   | 10  | 1185.6 | 8.2      | 1185.6 | 10       | 1.299346 |
| 13GRT04_16.FIN2 | 265   | 1.896  | 1.8935 | 0.0095 | 0.1853  | 0.0011  | 0.45264  | 1078.7 | 3.3 | 1095.9 | 5.8 | 1048.1 | 7.4      | 1095.9 | 5.8      | 1.594512 |
| 13GRT04_17.FIN2 | 98.5  | 0.998  | 5.64   | 0.028  | 0.3464  | 0.0019  | 0.58527  | 1922.6 | 4.2 | 1917.2 | 9.2 | 1929.5 | 4.7      | 1929.5 | 4.7      | 0.637471 |
| 13GRT04_18.FIN2 | 64.2  | 2.047  | 3.226  | 0.03   | 0.2596  | 0.0019  | 0.46077  | 1462.8 | 7.2 | 1487.6 | 9.9 | 1425.4 | 8.7      | 1425.4 | 8.7      | 4.363687 |
| 13GRT04_19.FIN2 | 34.4  | 0.706  | 1.865  | 0.022  | 0.1795  | 0.002   | 0.36766  | 1069.5 | 7.5 | 1064   | 11  | 1079   | 14       | 1064   | 11       | 0.514259 |
| 13GRT04_20.FIN2 | 122.4 | 1.572  | 1.982  | 0.013  | 0.1898  | 0.0014  | 0.55642  | 1109.2 | 4.4 | 1120   | 7.6 | 1088.9 | 8.7      | 1120   | 7.6      | 0.973675 |
| 13GRT04_21.FIN2 | 16.6  | 0.827  | 1.865  | 0.039  | 0.1785  | 0.0027  | 0.58834  | 1069   | 14  | 1061   | 14  | 1107   | 21       | 1061   | 14       | 0.748363 |
| 13GRT04_22.FIN2 | 144.8 | 1.395  | 0.1032 | 0.0024 | 0.01533 | 0.0002  | 0.088042 | 99.7   | 2.3 | 98.1   | 1.3 | 190    | 28       | 98.1   | 1.3      | 1.604814 |
| 13GRT04_23.FIN2 | 149   | 1.623  | 0.7    | 0.0073 | 0.08735 | 0.00073 | 0.38658  | 538.6  | 4.4 | 539.8  | 4.4 | 531    | 14       | 539.8  | 4.4      | 0.2228   |
| 13GRT04_24.FIN2 | 23.55 | 1.343  | 2.23   | 0.031  | 0.2046  | 0.0021  | 0.20253  | 1189.7 | 9.6 | 1200   | 11  | 1163   | 19       | 1163   | 11       | 0.865764 |
| 13GRT04_25.FIN2 | 125.5 | 0.806  | 0.3993 | 0.0053 | 0.05448 | 0.00054 | 0.47048  | 341    | 3.8 | 341.9  | 3.3 | 340    | 17       | 341.9  | 3.3      | 0.26393  |
| 13GRT04_26.FIN2 | 42.72 | 0.743  | 1.516  | 0.047  | 0.139   | 0.0026  | 0.16842  | 936    | 19  | 839    | 15  | 1184   | 44       | 839    | 15       | 10.36325 |
| 13GRT04_26.FIN2 | 32.8  | 0.815  | 1.806  | 0.042  | 0.1684  | 0.0036  | 0.65639  | 1048   | 16  | 1003   | 20  | 1156   | 22       | 1003   | 20       | 4.293893 |
| 13GRT04_27.FIN2 | 87    | 2.208  | 2.084  | 0.016  | 0.1973  | 0.0013  | 0.49114  | 1144.8 | 5.3 | 1160.6 | 7   | 1121.3 | 8.2      | 1160.6 | 7        | 1.380154 |
| 13GRT04_28.FIN2 | 245   | 1.58   | 1.879  | 0.048  | 0.1707  | 0.0034  | 0.48665  | 1071   | 17  | 1015   | 19  | 1193   | 32       | 1015   | 19       | 5.228758 |
| 13GRT04_29.FIN2 | 102.2 | 2      | 1.887  | 0.016  | 0.1823  | 0.0014  | 0.56171  | 1076.2 | 5.7 | 1079.7 | 7.5 | 1060.5 | 7.9      | 1079.7 | 7.5      | 0.325218 |
| 13GRT04_30.FIN2 | 141   | 0.824  | 9.19   | 0.18   | 0.4378  | 0.0046  | 0.90191  | 2356   | 18  | 2340   | 21  | 2371   | 17       | 2371   | 17       | 1.307465 |
| 13GRT04_31.FIN2 | 76.4  | 0.604  | 4.1    | 0.074  | 0.2622  | 0.005   | 0.82832  | 1654   | 15  | 1501   | 25  | 1853   | 11       | 1853   | 11       | 18.99622 |
| 13GRT04_31.FIN2 | 46.2  | 0.752  | 5.052  | 0.05   | 0.3264  | 0.0026  | 0.54585  | 1827.6 | 8.3 | 1821   | 13  | 1844   | 13       | 1844   | 13       | 1.247289 |
| 13GRT04_32.FIN2 | 115.5 | 1.635  | 4.832  | 0.031  | 0.323   | 0.0022  | 0.64884  | 1790.2 | 5.4 | 1804   | 10  | 1773.1 | 5.4      | 1773.1 | 5.4      | 1.742711 |
| 13GRT04_33.FIN2 | 81.6  | 0.7133 | 5.212  | 0.036  | 0.3391  | 0.0025  | 0.49424  | 1854.3 | 5.8 | 1882   | 12  | 1823.7 | 9.2      | 1823.7 | 9.2      | 3.196798 |
| 13GRT04_34.FIN2 | 68.9  | 0.7788 | 5.937  | 0.04   | 0.3578  | 0.0026  | 0.52125  | 1967   | 5.7 | 1971   | 12  | 1961.9 | 6.4      | 1961.9 | 6.4      | 0.463836 |
| 13GRT04_35.FIN2 | 83.9  | 1.07   | 3.152  | 0.024  | 0.2526  | 0.0018  | 0.62089  | 1445.2 | 5.8 | 1451.8 | 9.3 | 1439.4 | 7.5      | 1439.4 | 7.5      | 0.86147  |
| 13GRT04_36.FIN2 | 121.8 | 0.942  | 2.936  | 0.023  | 0.2375  | 0.0025  | 0.84868  | 1393.1 | 6   | 1374   | 13  | 1434.4 | 7.8      | 1434.4 | 7.8      | 4.21082  |
| 13GRT04_37.FIN2 | 167.1 | 1.201  | 2.94   | 0.02   | 0.2405  | 0.0016  | 0.42138  | 1392.6 | 5.2 | 1389.4 | 8.4 | 1395.6 | 9        | 1395.6 | 9        | 0.444253 |
| 13GRT04_38.FIN2 | 62.1  | 0.806  | 4.922  | 0.036  | 0.3182  | 0.0022  | 0.55239  | 1805.6 | 6.1 | 1781   | 11  | 1836.6 | 8        | 1836.6 | 8        | 3.027333 |
| 13GRT04_39.FIN2 | 17    | 0.792  | 5.209  | 0.064  | 0.3382  | 0.003   | 0.19397  | 1853   | 11  | 1878   | 15  | 1825   | 18       | 1825   | 18       | 2.90411  |
| 13GRT04_40.FIN2 | 38.7  | 0.784  | 5.309  | 0.051  | 0.3425  | 0.0032  | 0.44932  | 1869.6 | 8.2 | 1898   | 15  | 1836.7 | 9.8      | 1836.7 | 9.8      | 3.337507 |
| 13GRT04_41.FIN2 | 50.7  | 1.927  | 5.625  | 0.04   | 0.3498  | 0.0026  | 0.52681  | 1921.2 | 5.9 | 1933   | 12  | 1903.7 | 7.1      | 1903.7 | 7.1      | 1.539108 |
| 13GRT04_42.FIN2 | 277   | 6.63   | 2.164  | 0.055  | 0.1837  | 0.0035  | 0.92137  | 1168   | 18  | 1087   | 19  | 1315   | 17       | 1087   | 19       | 6.934932 |
| 13GRT04_43.FIN2 | 256.2 | 1.651  | 1.784  | 0.024  | 0.1743  | 0.0018  | 0.90303  | 1039.2 | 8.9 | 1035.7 | 9.8 | 1046   | 12       | 1035.7 | 9.8      | 0.336798 |
| 13GRT04_44.FIN2 | 196.8 | 2.835  | 1.828  | 0.018  | 0.1751  | 0.0015  | 0.75686  | 1056.1 | 6.4 | 1040   | 8.5 | 1088.9 | 7.2      | 1040   | 8.5      | 1.524477 |
| 13GRT04_45.FIN2 | 263   | 0.944  | 4.412  | 0.033  | 0.3046  | 0.0021  | 0.49613  | 1715.2 | 6   | 1714   | 10  | 1715.3 | 6        | 1715.3 | 6        | 0.075788 |
| 13GRT04_46.FIN2 | 111.3 | 1.122  | 9.554  | 0.079  | 0.4357  | 0.0038  | 0.78513  | 2392.3 | 7.6 | 2333   | 16  | 2445.9 | 5.4      | 2445.9 | 5.4      | 4.615888 |
| 13GRT04_47.FIN2 | 100   | 1.9    | 2.239  | 0.025  | 0.2083  | 0.0023  | 0.6838   | 1192.7 | 7.9 | 1219   | 12  | 1145   | 10       | 1145   | 12       | 2.205081 |
| 13GRT04_48.FIN2 | 52.6  | 1.391  | 1.912  | 0.031  | 0.1819  | 0.0027  | 0.90514  | 1084   | 11  | 1077   | 15  | 1100   | 11       | 1077   | 15       | 0.645756 |
| 13GRT04_49.FIN2 | 138.2 | 1.02   | 3.642  | 0.041  | 0.2523  | 0.0031  | 0.8929   | 1558.1 | 9   | 1450   | 16  | 1702.6 | 7.5      | 1702.6 | 7.5      | 14.83613 |
| 13GRT04_50.FIN2 | 81.1  | 0.7645 | 13.327 | 0.083  | 0.5269  | 0.0034  | 0.62706  | 2702.8 | 5.9 | 2728   | 14  | 2683.4 | 4.8      | 2683.4 | 4.8      | 1.662071 |
| 13GRT04_51.FIN2 | 168.2 | 2.368  | 2.297  | 0.013  | 0.2109  | 0.0013  | 0.62446  | 1211.1 | 4.1 | 1233.4 | 7   | 1166   | 6.7      | 1166   | 7        | 1.841301 |
| 13GRT04_52.FIN2 | 118.8 | 1.109  | 1.956  | 0.013  | 0.1822  | 0.0014  | 0.3921   | 1100.2 | 4.5 | 1079.1 | 7.5 | 1147.5 | 9        | 1079.1 | 7.5      | 1.917833 |
| 13GRT04_53.FIN2 | 475.3 | 1.605  | 0.115  | 0.0023 | 0.01614 | 0.00014 | 0.21148  | 110.5  | 2.1 | 103.19 | 0.9 | 256    | 36       | 103.19 | 0.9      | 6.615385 |
| 13GRT04_54.FIN2 | 438   | 6.28   | 4.761  | 0.062  | 0.3151  | 0.0041  | 0.94716  | 1777   | 11  | 1765   | 20  | 1787.9 | 4.5      | 1787.9 | 4.5      | 1.280832 |
| 13GRT04_55.FIN2 | 86.5  | 1.326  | 2.177  | 0.05   | 0.1941  | 0.0013  | 0.62096  | 1171   | 15  | 1143.3 | 6.8 | 1234   | 41       | 1143.3 | 6.8      | 2.3655   |
| 13GRT04_56.FIN2 | 114.1 | 1.655  | 2.032  | 0.015  | 0.1941  | 0.0012  | 0.26986  | 1126.1 | 4.9 | 1143.3 | 6.4 | 1092.2 | 8.9      | 1143.3 | 6.4      | 1.527395 |
| 13GRT04_57.FIN2 | 50.1  | 0.4869 | 6.172  | 0.042  | 0.3726  | 0.0033  | 0.52025  | 2000.1 | 6   | 2041   | 16  | 1962.8 | 7.3      | 1962.8 | 7.3      | 3.984104 |
| 13GRT04_58.FIN2 | 97.5  | 1.48   | 1.978  | 0.016  | 0.1916  | 0.0014  | 0.49662  | 1107.6 | 5.5 | 1130   | 7.8 | 1068.9 | 9.8      | 1130   | 7.8      | 2.022391 |
| 13GRT04_59.FIN2 | 86    | 0.372  | 1.017  | 0.072  | 0.0433  | 0.0027  | 0.36472  | 705    | 36  | 273    | 17  | 2610   | 130 DISC | DISC   | 89.54023 |          |
| 13GRT04_60.FIN2 | 49.4  | 0.4319 | 5.322  | 0.039  | 0.3421  | 0.0025  | 0.43138  | 1872.8 | 6.4 | 1897   | 12  | 1840.8 | 7.9      | 1840.8 | 7.9      | 3.05302  |
| 13GRT04_61.FIN2 | 42    | 0.875  | 2.014  | 0.019  | 0.1924  | 0.0013  | 0.31781  | 1120   | 6.3 | 1134   | 7.3 | 1090   | 13       | 1134   | 7.3      | 1.25     |
| 13GRT04_62.FIN2 | 64.5  | 1.7    | 13.09  | 0.13   | 0.5131  | 0.0049  | 0.92433  | 2685.4 | 9.2 | 2669   | 21  | 2693.4 | 8.1      | 2693.4 | 8.1      | 0.905918 |
| 13GRT04_63.FIN2 | 60.7  | 1.321  | 5.797  | 0.037  | 0.3587  | 0.0023  | 0.43407  | 1945.7 | 5.5 | 1976   | 11  | 1911.2 | 7.6      | 1911.2 | 7.6      | 3.39054  |
| 13GRT04_64.FIN2 | 122.6 | 1.2    |        |        |         |         |          |        |     |        |     |        |          |        |          |          |

|                  |       |        |        |        |         |         |          |        |     |        |     |        |     |        |     |          |
|------------------|-------|--------|--------|--------|---------|---------|----------|--------|-----|--------|-----|--------|-----|--------|-----|----------|
| 13GRT04_85.FIN2  | 12.85 | 1.166  | 1.903  | 0.053  | 0.1825  | 0.0034  | 0.24243  | 1085   | 17  | 1080   | 18  | 1072   | 38  | 1080   | 18  | 0.460829 |
| 13GRT04_86.FIN2  | 45.3  | 0.889  | 2.047  | 0.036  | 0.191   | 0.0017  | 0.39448  | 1130   | 12  | 1126.9 | 9.2 | 1124   | 21  | 1126.9 | 9.2 | 0.274336 |
| 13GRT04_87.FIN2  | 28.1  | 0.964  | 2.791  | 0.033  | 0.2378  | 0.0025  | 0.42826  | 1352.5 | 8.8 | 1375   | 13  | 1315   | 15  | 1315   | 15  | 4.562738 |
| 13GRT04_88.FIN2  | 69.9  | 0.5305 | 5.811  | 0.043  | 0.3572  | 0.0025  | 0.58774  | 1947.7 | 6.5 | 1969   | 12  | 1933.5 | 6.5 | 1933.5 | 6.5 | 1.836049 |
| 13GRT04_89.FIN2  | 32.2  | 0.984  | 2.05   | 0.034  | 0.1893  | 0.0021  | 0.47953  | 1131   | 11  | 1118   | 11  | 1166   | 19  | 1118   | 11  | 1.149425 |
| 13GRT04_90.FIN2  | 127   | 1.285  | 1.981  | 0.013  | 0.1901  | 0.0013  | 0.48181  | 1109.6 | 4.4 | 1122   | 7.3 | 1079.6 | 9.2 | 1122   | 7.3 | 1.11752  |
| 13GRT04_91.FIN2  | 108.1 | 2.07   | 4.184  | 0.045  | 0.2937  | 0.002   | 0.78311  | 1670.1 | 9   | 1660   | 10  | 1686   | 9.7 | 1686   | 9.7 | 1.542112 |
| 13GRT04_92.FIN2  | 76.5  | 0.5589 | 0.841  | 0.01   | 0.10034 | 0.00099 | 0.20254  | 620.2  | 5.6 | 616.3  | 5.8 | 621    | 18  | 616.3  | 5.8 | 0.628829 |
| 13GRT04_93.FIN2  | 167.7 | 0.964  | 1.933  | 0.012  | 0.1868  | 0.0013  | 0.44761  | 1092.4 | 4.3 | 1103.7 | 6.8 | 1070.3 | 9.4 | 1103.7 | 6.8 | 1.03442  |
| 13GRT04_94.FIN2  | 299.7 | 1.136  | 2.757  | 0.029  | 0.2326  | 0.0028  | 0.88449  | 1345   | 7.4 | 1348   | 15  | 1338.8 | 7.9 | 1338.8 | 7.9 | 0.687183 |
| 13GRT04_95.FIN2  | 161   | 1.244  | 1.999  | 0.015  | 0.1912  | 0.0013  | 0.43396  | 1114.9 | 5   | 1128   | 6.9 | 1092   | 9.8 | 1128   | 6.9 | 1.174993 |
| 13GRT04_96.FIN2  | 115   | 0.911  | 2.356  | 0.015  | 0.2106  | 0.0014  | 0.685    | 1229.2 | 4.5 | 1231.8 | 7.7 | 1223   | 6.5 | 1223   | 6.5 | 0.719542 |
| 13GRT04_97.FIN2  | 98.4  | 1.558  | 1.917  | 0.021  | 0.1836  | 0.0015  | 0.40658  | 1086.7 | 7.1 | 1086.6 | 8.2 | 1088   | 14  | 1086.6 | 8.2 | 0.009202 |
| 13GRT04_98.FIN2  | 89.9  | 1.105  | 6.032  | 0.039  | 0.3663  | 0.0021  | 0.50621  | 1980.2 | 5.7 | 2012   | 9.9 | 1947.2 | 7.4 | 1947.2 | 7.4 | 3.327855 |
| 13GRT04_99.FIN2  | 40    | 1.217  | 2.02   | 0.025  | 0.1931  | 0.0021  | 0.46374  | 1122.7 | 8.5 | 1138   | 12  | 1085   | 15  | 1138   | 12  | 1.362786 |
| 13GRT04_100.FIN2 | 64.8  | 0.669  | 1.74   | 0.025  | 0.1696  | 0.0023  | 0.77332  | 1022.7 | 9.2 | 1010   | 13  | 1052   | 11  | 1010   | 13  | 1.241811 |
| 13GRT04_101.FIN2 | 34.3  | 0.717  | 5.24   | 0.042  | 0.3399  | 0.0029  | 0.5333   | 1858.8 | 6.8 | 1888   | 14  | 1835.3 | 7.8 | 1835.3 | 7.8 | 2.871465 |
| 13GRT04_102.FIN2 | 75.7  | 1.046  | 4.876  | 0.043  | 0.3266  | 0.0023  | 0.72151  | 1797.7 | 7.3 | 1822   | 11  | 1769.4 | 7.5 | 1769.4 | 7.5 | 2.972759 |
| 13GRT04_103.FIN2 | 215.8 | 2.755  | 1.829  | 0.011  | 0.17922 | 0.00094 | 0.56567  | 1055.8 | 4.1 | 1062.7 | 5.1 | 1029.8 | 6.8 | 1062.7 | 5.1 | 0.653533 |
| 13GRT04_104.FIN2 | 97.1  | 1.027  | 3.647  | 0.026  | 0.2799  | 0.002   | 0.69169  | 1559.6 | 5.7 | 1591   | 9.9 | 1512.2 | 6.1 | 1512.2 | 6.1 | 5.210951 |
| 13GRT04_105.FIN2 | 81.3  | 0.68   | 3.201  | 0.023  | 0.2578  | 0.0017  | 0.60527  | 1457.2 | 5.5 | 1478.3 | 8.9 | 1428.1 | 6.8 | 1428.1 | 6.8 | 3.51516  |
| 13GRT04_106.FIN2 | 183   | 1.212  | 1.949  | 0.016  | 0.1866  | 0.0015  | 0.62378  | 1097.9 | 5.5 | 1102.7 | 8.1 | 1089.7 | 8.3 | 1102.7 | 8.1 | 0.437198 |
| 13GRT04_107.FIN2 | 197   | 1.52   | 12.81  | 0.17   | 0.5142  | 0.0072  | 0.82229  | 2665   | 13  | 2674   | 31  | 2648.2 | 8.4 | 2648.2 | 8.4 | 0.974247 |
| 13GRT04_108.FIN2 | 383   | 1.677  | 1.865  | 0.014  | 0.179   | 0.0014  | 0.62149  | 1068.6 | 4.8 | 1061.2 | 7.4 | 1089   | 10  | 1061.2 | 7.4 | 0.692495 |
| 13GRT04_109.FIN2 | 71.2  | 0.8934 | 1.991  | 0.019  | 0.1867  | 0.0017  | 0.43928  | 1112.8 | 6.5 | 1103.3 | 9.1 | 1123   | 12  | 1103.3 | 9.1 | 0.853702 |
| 13GRT04_110.FIN2 | 49.5  | 0.911  | 7.02   | 0.064  | 0.3966  | 0.0035  | 0.65794  | 2114.4 | 8   | 2155   | 16  | 2078.6 | 7.2 | 2078.6 | 7.2 | 3.675551 |
| 13GRT04_112.FIN2 | 66.2  | 1.49   | 2.087  | 0.02   | 0.1991  | 0.002   | 0.51146  | 1145.1 | 6.5 | 1171   | 11  | 1092   | 11  | 1171   | 11  | 2.261811 |
| 13GRT04_113.FIN2 | 15.88 | 1.099  | 5.669  | 0.072  | 0.3568  | 0.0039  | 0.75232  | 1926   | 11  | 1967   | 18  | 1888.5 | 8.4 | 1888.5 | 8.4 | 4.156738 |
| 13GRT04_114.FIN2 | 132   | 1.257  | 2.079  | 0.015  | 0.1969  | 0.0013  | 0.43505  | 1141.6 | 4.9 | 1158.5 | 7   | 1105.7 | 9.6 | 1158.5 | 7   | 1.480378 |
| 13GRT04_115.FIN2 | 40.4  | 0.575  | 1.772  | 0.028  | 0.1737  | 0.002   | 0.59219  | 1034   | 10  | 1032   | 11  | 1034   | 12  | 1032   | 11  | 0.193424 |
| 13GRT04_117.FIN2 | 603   | 1.903  | 0.8507 | 0.0069 | 0.0954  | 0.0012  | 0.080252 | 624.9  | 3.8 | 587.2  | 6.9 | 775    | 28  | 587.2  | 6.9 | 6.032965 |
| 13GRT04_118.FIN2 | 271.4 | 1.066  | 2.383  | 0.021  | 0.2029  | 0.0024  | 0.76506  | 1237.2 | 6.4 | 1191   | 13  | 1318   | 11  | 1191   | 13  | 3.734239 |
| 13GRT04_119.FIN2 | 28.7  | 1.046  | 0.918  | 0.016  | 0.108   | 0.0012  | 0.21674  | 660.4  | 8.3 | 660.9  | 6.8 | 670    | 23  | 660.9  | 6.8 | 0.075712 |
| 13GRT04_120.FIN2 | 64.4  | 1.747  | 1.824  | 0.021  | 0.1748  | 0.0024  | 0.62676  | 1053.5 | 7.5 | 1038   | 13  | 1095   | 24  | 1038   | 13  | 1.471286 |
| 13GRT04_121.FIN2 | 584   | 4.82   | 0.5953 | 0.0075 | 0.0716  | 0.0014  | 0.29557  | 474    | 4.7 | 445.6  | 8.6 | 589    | 52  | 445.6  | 8.6 | 5.991561 |

|                |       |        |        |        |         |         |          |        |     |        |     |        |     |        |      |          |
|----------------|-------|--------|--------|--------|---------|---------|----------|--------|-----|--------|-----|--------|-----|--------|------|----------|
| 13WSUN_1.FIN2  | 144.7 | 3.11   | 0.5689 | 0.0059 | 0.07322 | 0.00075 | 0.36878  | 457.1  | 3.9 | 455.5  | 4.5 | 474    | 19  | 455.5  | 4.5  | 0.350033 |
| 13WSUN_2.FIN2  | 467   | 67.6   | 1.699  | 0.011  | 0.1691  | 0.0011  | 0.61646  | 1008.1 | 4.2 | 1006.9 | 6.2 | 1009.8 | 7.9 | 1006.9 | 6.2  | 0.119036 |
| 13WSUN_3.FIN2  | 72.3  | 1.939  | 1.63   | 0.02   | 0.1641  | 0.0018  | 0.3654   | 981.2  | 7.6 | 979.4  | 9.8 | 979    | 14  | 979.4  | 9.8  | 0.183449 |
| 13WSUN_4.FIN2  | 59.8  | 3.978  | 0.2648 | 0.0092 | 0.0373  | 0.00068 | 0.31156  | 238    | 7.4 | 236    | 4.2 | 341    | 41  | 236    | 4.2  | 0.840336 |
| 13WSUN_5.FIN2  | 101.2 | 1.343  | 5.122  | 0.061  | 0.3321  | 0.0047  | 0.54721  | 1841   | 10  | 1848   | 23  | 1832   | 15  | 1832   | 15   | 0.873362 |
| 13WSUN_6.FIN2  | 167.7 | 1.87   | 3.527  | 0.073  | 0.2472  | 0.0045  | 0.88778  | 1537   | 17  | 1423   | 23  | 1705   | 11  | 1705   | 11   | 16.53959 |
| 13WSUN_7.FIN2  | 152.6 | 0.975  | 0.883  | 0.012  | 0.1057  | 0.0013  | 0.25873  | 642    | 6.5 | 647.5  | 7.7 | 653    | 19  | 647.5  | 7.7  | 0.856698 |
| 13WSUN_8.FIN2  | 88.3  | 1.176  | 4.84   | 0.2    | 0.2868  | 0.003   | 0.19212  | 1782   | 33  | 1627   | 14  | 1972   | 68  | 1972   | 68   | 17.49493 |
| 13WSUN_9.FIN2  | 77.2  | 1.23   | 15.35  | 0.14   | 0.5499  | 0.0045  | 0.62123  | 2837   | 8.8 | 2824   | 19  | 2842.7 | 7.1 | 2842.7 | 7.1  | 0.657825 |
| 13WSUN_10.FIN2 | 49.3  | 1.709  | 1.711  | 0.024  | 0.1715  | 0.0017  | 0.11092  | 1011.9 | 9.2 | 1021.5 | 8.9 | 996    | 16  | 1021.5 | 8.9  | 0.94871  |
| 13WSUN_11.FIN2 | 332   | 1.593  | 0.106  | 0.0023 | 0.0158  | 0.00018 | 0.23392  | 102.3  | 2.1 | 101    | 1.1 | 160    | 34  | 101    | 1.1  | 1.270772 |
| 13WSUN_12.FIN2 | 49.4  | 1.096  | 3.76   | 0.052  | 0.2461  | 0.0032  | 0.6688   | 1585   | 11  | 1418   | 17  | 1809   | 12  | 1809   | 12   | 21.61415 |
| 13WSUN_13.FIN2 | 6.78  | 1.072  | 1.515  | 0.057  | 0.1525  | 0.0035  | 0.25908  | 932    | 23  | 915    | 20  | 999    | 46  | 915    | 20   | 1.824034 |
| 13WSUN_14.FIN2 | 5.87  | 0.797  | 11.78  | 0.19   | 0.4616  | 0.0084  | 0.67612  | 2588   | 15  | 2444   | 37  | 2707   | 17  | 2707   | 17   | 9.715552 |
| 13WSUN_15.FIN2 | 34.14 | 1.397  | 2.266  | 0.036  | 0.1931  | 0.0027  | 0.40333  | 1203   | 12  | 1138   | 15  | 1319   | 21  | 1138   | 15   | 5.403159 |
| 13WSUN_16.FIN2 | 6.35  | 1.26   | 0.674  | 0.039  | 0.0862  | 0.0029  | 0.086721 | 522    | 23  | 533    | 17  | 561    | 64  | 533    | 17   | 2.10728  |
| 13WSUN_17.FIN2 | 6.91  | 2.97   | 1.42   | 0.085  | 0.136   | 0.0052  | 0.12393  | 899    | 34  | 821    | 30  | 1098   | 71  | 821    | 30   | 8.676307 |
| 13WSUN_18.FIN2 | 11.16 | 1.068  | 1.856  | 0.05   | 0.1684  | 0.0036  | 0.43115  | 1063   | 18  | 1008   | 19  | 1174   | 31  | 1008   | 19   | 5.174036 |
| 13WSUN_19.FIN2 | 2.59  | 0.483  | 10.11  | 0.31   | 0.433   | 0.012   | 0.13732  | 2444   | 30  | 2315   | 53  | 2593   | 42  | 2593   | 42   | 10.72117 |
| 13WSUN_20.FIN2 | 17.74 | 0.647  | 0.079  | 0.011  | 0.01216 | 0.00063 | 0.16028  | 77     | 11  | 77.9   | 4   | 440    | 110 | 77.9   | 4    | 1.168831 |
| 13WSUN_21.FIN2 | 9.68  | 0.837  | 0.144  | 0.015  | 0.0214  | 0.0013  | 0.14887  | 136    | 13  | 136.4  | 8.4 | 470    | 140 | 136.4  | 8.4  | 0.294118 |
| 13WSUN_22.FIN2 | 4.81  | 0.545  | 3.57   | 0.16   | 0.2461  | 0.0089  | 0.32429  | 1543   | 34  | 1417   | 46  | 1739   | 57  | 1739   | 57   | 18.51639 |
| 13WSUN_23.FIN2 | 8.11  | 0.853  | 8.7    | 0.22   | 0.3647  | 0.0092  | 0.56977  | 2307   | 24  | 2002   | 44  | 2570   | 24  | 2570   | 24   | 22.10117 |
| 13WSUN_24.FIN2 | 7.96  | 0.797  | 0.68   | 0.034  | 0.0845  | 0.0032  | 0.38904  | 524    | 20  | 522    | 19  | 601    | 71  | 522    | 19   | 0.381679 |
| 13WSUN_25.FIN2 | 305   | 1.977  | 4.516  | 0.031  | 0.3194  | 0.0026  | 0.72032  | 1733.7 | 5.7 | 1786   | 13  | 1672.4 | 4.9 | 1672.4 | 4.9  | 6.792633 |
| 13WSUN_26.FIN2 | 100.5 | 0.4386 | 0.926  | 0.012  | 0.1081  | 0.0013  | 0.43588  | 665.4  | 6.3 | 661.8  | 7.6 | 674    | 18  | 661.8  | 7.6  | 0.541028 |
| 13WSUN_27.FIN2 | 158.8 | 1.284  | 3.515  | 0.039  | 0.2681  | 0.0034  | 0.67962  | 1529.9 | 8.7 | 1531   | 17  | 1509   | 11  | 1509   | 11   | 1.457919 |
| 13WSUN_28.FIN2 | 49.9  | 0.4292 | 2.471  | 0.033  | 0.2156  | 0.0026  | 0.66328  | 1263.8 | 9.7 | 1258   | 14  | 1264   | 11  | 1264   | 11   | 0.474684 |
| 13WSUN_29.FIN2 | 158.4 | 0.7783 | 2.293  | 0.024  | 0.2064  | 0.002   | 0.65106  | 1209.7 | 7.3 | 1210   | 11  | 1204.8 | 8.8 | 1204.8 | 8.8  | 0.431607 |
| 13WSUN_30.FIN2 | 155.9 | 2.162  | 2.152  | 0.026  | 0.1948  | 0.0013  | 0.3521   | 1165.1 | 8.3 | 1147.1 | 7   | 1196   | 18  | 1147.1 | 7    | 1.544932 |
| 13WSUN_31.FIN2 | 9.9   | 0.2451 | 8.3    | 0.22   | 0.0879  | 0.003   | 0.29236  | 2267   | 26  | 543    | 18  | 4732   | 32  | DISC   | DISC | 88.52494 |
| 13WSUN_31.FIN2 | 4.4   | 0.2632 | 13.3   | 0.47   | 0.129   | 0.0054  | 0.54222  | 2703   | 35  | 782    | 31  | 4769   | 32  | DISC   | DISC | 83.60243 |
| 13WSUN_32.FIN2 | 247   | 2.41   | 1.992  | 0.026  | 0.1821  | 0.0025  | 0.82972  | 1112   | 8.9 | 1078   | 14  | 1169   | 10  | 1078   | 14   | 3.057554 |
| 13WSUN_33.FIN2 | 368   | 2.302  | 2.098  | 0.019  | 0.186   | 0.002   | 0.77408  | 1147.9 | 6.4 | 1099   | 11  | 1237.1 | 9.4 | 1099   | 11   | 4.259933 |
| 13WSUN_34.FIN2 | 136.2 | 2.853  | 2.696  | 0.04   | 0.2219  | 0.0031  | 0.77507  | 1328   | 11  | 1291   | 16  | 1356   | 13  | 1356   | 13   | 4.79351  |
| 13WSUN_35.FIN2 | 165   | 0.832  | 4.546  | 0.028  | 0.3069  | 0.0022  | 0.6783   | 1739.7 | 5   | 1725   | 11  | 1761   | 5   | 1761   | 5    | 2.044293 |
| 13WSUN_36.FIN2 | 241   | 1.23   | 0.5471 | 0.0058 | 0.06785 | 0.00076 | 0.34979  | 443    | 3.8 | 423.2  | 4.6 | 550    | 16  | 423.2  | 4.6  | 4.469526 |
| 13WSUN_37.FIN2 | 93.5  | 0.447  | 0.5088 | 0.0083 | 0.06603 | 0.00082 | 0.34681  | 418    | 5.7 | 412.2  | 5   | 432    | 19  | 412.2  | 5    | 1.38756  |
| 13WSUN_38.FIN2 | 65.95 | 0.592  | 1.695  | 0.015  | 0.1657  | 0.0017  | 0.20589  | 1006.5 | 5.7 | 988.2  | 9.4 | 1046   | 15  | 988.2  | 9.4  | 1.818182 |
| 13WSUN_39.FIN2 | 169   | 1.002  | 0.87   | 0.011  | 0.1032  | 0.001   | 0.53809  | 635.4  | 6.1 | 633.1  | 6   | 636    | 15  | 633.1  | 6    | 0.361977 |
| 13WSUN_40.FIN2 | 29.3  | 0.921  | 1.69   | 0.032  | 0.1675  | 0.0017  | 0.094499 | 1005   | 12  | 998.1  | 9.6 | 1033   | 25  | 998.1  | 9.6  | 0.686567 |
| 13WSUN_41.FIN2 | 51.7  | 5.7    | 4.823  | 0.03   | 0.3179  | 0.0023  | 0.67011  | 1788.6 | 5.2 | 1779   | 11  | 1802.2 | 6.7 | 1802.2 | 6.7  | 1.287316 |
| 13WSUN_42.FIN2 | 154.6 | 1.97   | 0.844  | 0.014  | 0.1     | 0.0014  | 0.54336  | 621.7  | 7.3 | 614.5  | 8.4 | 655    | 20  | 614.5  | 8.4  | 1.158115 |
| 13WSUN_43.FIN2 | 354   | 3.794  | 4.764  | 0.037  | 0.3171  | 0.003   | 0.70407  | 1779   | 6.7 | 1777   | 14  | 1778.9 | 7.4 | 1778.9 | 7.4  | 0.106808 |
| 13WSUN_44.FIN2 | 115.1 | 0.7513 | 2.313  | 0.044  | 0.2112  | 0.0047  | 0.54518  | 1216   | 13  | 1235   | 25  | 1174   | 24  | 1174   | 25   | 1.5625   |
| 13WSUN_45.FIN2 | 400.4 | 2.39   | 0.5799 | 0.0056 | 0.0752  | 0.00064 | 0.42029  | 464.8  | 3.7 | 467.4  | 3.8 | 473.3  | 9.6 | 467.4  | 3.8  | 0.55938  |
| 13WSUN_46.FIN2 | 136.8 | 0.5624 | 13.26  | 0.13   | 0.5153  | 0.0055  | 0.65309  | 2698.2 | 9.2 | 2679   | 23  | 2722   | 12  | 2722   | 12   | 1.579721 |
| 13WSUN_47.FIN2 | 396   | 0.798  | 0.613  | 0.0061 | 0.07789 | 0.0008  | 0.63146  | 485.3  | 3.8 | 483.5  | 4.8 | 495    | 12  | 483.5  | 4.8  | 0.370905 |
| 13WSUN_48.FIN2 | 111.5 | 1.406  | 11.3   | 0.093  | 0.4874  | 0.0044  | 0.70121  | 2547.7 | 7.6 | 2561   | 19  | 2541.4 | 6.1 | 2541.4 | 6.1  | 0.771228 |
| 13WSUN_49.FIN2 | 277   | 4.41   | 3.718  | 0.026  | 0.2833  | 0.0021  | 0.69502  | 1574.9 | 5.5 | 1610   | 11  | 1522.2 | 9.8 | 1522.2 | 9.8  | 5.767967 |
| 13WSUN_50.FIN2 | 174.5 | 0.786  | 1.96   | 0.012  | 0.18737 | 0.00098 | 0.23024  | 1101.7 | 4.2 | 1107.1 | 5.3 | 1082.4 | 5.5 | 1107.1 | 5.3  | 0.490152 |
| 13WSUN_51.FIN2 | 109.4 | 1.692  | 4.466  | 0.077  | 0.3017  | 0.0065  | 0.76157  | 1724   | 14  | 1704   | 31  | 1751   | 18  | 1751   | 18   | 2.68418  |
| 13WSUN_52.FIN2 | 159.6 | 4.85   | 0.5437 | 0.0077 | 0.06987 | 0.0009  | 0.45981  | 440.7  | 5.1 | 435.3  | 5.4 | 456    | 18  | 435.3  | 5.4  | 1.225323 |
| 13WSUN_53.FIN2 | 68.6  | 0.594  | 0.827  | 0.013  | 0.0987  | 0.001   | 0.34725  | 612.6  | 7.1 | 607    | 5.9 | 615    | 20  | 607    | 5.9  | 0.914136 |
| 13WSUN_54.FIN2 | 70.6  | 0.524  | 14.5   | 0.12   | 0.5529  | 0.005   | 0.70033  | 2782.6 | 8   | 2837   | 21  | 2749.9 | 6.2 | 2749.9 | 6.2  | 3.167588 |
| 13WSUN_55.FIN2 | 63.2  | 1.194  | 2.684  | 0.038  | 0.2279  | 0.0034  | 0.57869  | 1323   | 11  | 1323   | 18  | 1322   | 15  | 1322   | 15   | 0.076343 |
| 13WSUN_56.FIN2 | 284.9 | 1.768  | 5.437  | 0.036  | 0.3422  | 0.0021  | 0.57966  | 1890.5 | 5.7 | 1897   | 10  | 1882.8 | 7.1 | 1882.8 | 7.1  | 0.754196 |
| 13WSUN_57.FIN2 | 160.7 | 1.43   | 0.1388 | 0.0039 | 0.0182  | 0.00027 | 0.19947  | 131.8  | 3.4 | 116.2  | 1.7 | 419    | 39  | 116.2  | 1.7  | 1.183612 |
| 13WSUN_58.FIN2 | 327   | 1.375  | 2.097  | 0.014  | 0.1947  | 0.0014  | 0.55544  | 1147.7 | 4.5 | 1147   | 7.8 | 1154.3 | 9.1 | 1147   | 7.8  | 0.060991 |

|                 |       |        |        |        |         |         |          |        |     |        |     |        |     |        |      |           |
|-----------------|-------|--------|--------|--------|---------|---------|----------|--------|-----|--------|-----|--------|-----|--------|------|-----------|
| 13WSUN_59.FIN2  | 61.8  | 0.589  | 3.537  | 0.034  | 0.2723  | 0.0029  | 0.52018  | 1535.1 | 7.7 | 1552   | 15  | 1495   | 12  | 1495   | 12   | 3.812709  |
| 13WSUN_60.FIN2  | 406   | 6.8    | 2.158  | 0.023  | 0.1964  | 0.002   | 0.6922   | 1168.5 | 7   | 1156   | 11  | 1187   | 10  | 1156   | 11   | 1.069748  |
| 13WSUN_61.FIN2  | 97.7  | 0.9811 | 3.794  | 0.035  | 0.2824  | 0.0025  | 0.63544  | 1591.9 | 7.2 | 1603   | 13  | 1580.5 | 8.5 | 1580.5 | 8.5  | 1.4236    |
| 13WSUN_62.FIN2  | 65.9  | 0.8101 | 4.245  | 0.038  | 0.3021  | 0.0023  | 0.55054  | 1682.3 | 7.4 | 1701   | 12  | 1663.1 | 9.4 | 1663.1 | 9.4  | 2.278877  |
| 13WSUN_63.FIN2  | 59.2  | 0.873  | 1.489  | 0.024  | 0.1509  | 0.0023  | 0.59329  | 925.5  | 9.8 | 906    | 13  | 1002   | 17  | 906    | 13   | 2.106969  |
| 13WSUN_64.FIN2  | 87    | 0.941  | 0.887  | 0.017  | 0.1026  | 0.0012  | 0.10358  | 643.9  | 8.8 | 629.5  | 6.8 | 681    | 24  | 629.5  | 6.8  | 2.236372  |
| 13WSUN_65.FIN2  | 268.1 | 0.876  | 0.5642 | 0.0082 | 0.0734  | 0.00079 | 0.50602  | 454.8  | 5.4 | 456.5  | 4.7 | 460    | 17  | 456.5  | 4.7  | 0.373791  |
| 13WSUN_66.FIN2  | 382   | 1.261  | 0.4091 | 0.0048 | 0.05621 | 0.0006  | 0.49829  | 348.1  | 3.5 | 352.5  | 3.6 | 319    | 14  | 352.5  | 3.6  | 1.264005  |
| 13WSUN_67.FIN2  | 53.2  | 0.655  | 4.062  | 0.046  | 0.2926  | 0.0036  | 0.58919  | 1647.1 | 9.4 | 1656   | 18  | 1629   | 11  | 1629   | 11   | 1.657459  |
| 13WSUN_68.FIN2  | 71.8  | 1.429  | 1.961  | 0.018  | 0.1877  | 0.0019  | 0.33625  | 1101.8 | 6.3 | 1109   | 10  | 1094   | 13  | 1109   | 10   | 0.653476  |
| 13WSUN_69.FIN2  | 32.2  | 2.52   | 0.964  | 0.023  | 0.1107  | 0.002   | 0.003794 | 684    | 12  | 676    | 11  | 725    | 33  | 676    | 11   | 1.169591  |
| 13WSUN_70.FIN2  | 17.47 | 0.957  | 4.88   | 0.46   | 0.2925  | 0.0093  | 0.62807  | 1778   | 68  | 1653   | 46  | 1947   | 99  | 1947   | 99   | 15.10015  |
| 13WSUN_71.FIN2  | 215   | 18.4   | 0.75   | 0.063  | 0.0851  | 0.0036  | 0.25808  | 566    | 36  | 527    | 21  | 691    | 83  | 527    | 21   | 6.890459  |
| 13WSUN_71.FIN2  | 80.5  | 2.392  | 1.819  | 0.018  | 0.1786  | 0.0014  | 0.084788 | 1052.2 | 6.6 | 1059.1 | 7.9 | 1045   | 15  | 1059.1 | 7.9  | 0.655769  |
| 13WSUN_72.FIN2  | 158   | 1.307  | 0.1003 | 0.0027 | 0.01502 | 0.00027 | 0.083627 | 97     | 2.5 | 96.1   | 1.7 | 206    | 32  | 96.1   | 1.7  | 0.927835  |
| 13WSUN_73.FIN2  | 101.4 | 1.592  | 2.841  | 0.034  | 0.2325  | 0.0028  | 0.40478  | 1366.8 | 8.8 | 1347   | 15  | 1399   | 13  | 1399   | 13   | 3.716941  |
| 13WSUN_74.FIN2  | 164.1 | 1.657  | 0.0976 | 0.0026 | 0.01491 | 0.00024 | 0.011356 | 94.9   | 2.4 | 95.4   | 1.5 | 173    | 26  | 95.4   | 1.5  | 0.52687   |
| 13WSUN_75.FIN2  | 16.4  | 1.385  | 1.966  | 0.039  | 0.1901  | 0.0031  | 0.67075  | 1105   | 14  | 1121   | 17  | 1098   | 27  | 1121   | 17   | 1.447964  |
| 13WSUN_76.FIN2  | 85.2  | 1.429  | 3.011  | 0.026  | 0.2485  | 0.0021  | 0.44869  | 1410.1 | 6.7 | 1434   | 11  | 1379.4 | 8.9 | 1379.4 | 8.9  | 3.958243  |
| 13WSUN_77.FIN2  | 110.5 | 1.076  | 1.455  | 0.017  | 0.1535  | 0.0015  | 0.54047  | 911.4  | 6.8 | 920.5  | 8.2 | 891    | 13  | 920.5  | 8.2  | 0.998464  |
| 13WSUN_78.FIN2  | 161.1 | 2.93   | 3.154  | 0.031  | 0.2545  | 0.0026  | 0.70831  | 1445.5 | 7.6 | 1461   | 13  | 1410.8 | 8.6 | 1410.8 | 8.6  | 3.558265  |
| 13WSUN_79.FIN2  | 28.86 | 0.3677 | 5.425  | 0.085  | 0.3551  | 0.0047  | 0.49893  | 1887   | 13  | 1958   | 23  | 1820   | 17  | 1820   | 17   | 7.582418  |
| 13WSUN_80.FIN2  | 70.5  | 0.642  | 2.712  | 0.037  | 0.2306  | 0.0029  | 0.12678  | 1331   | 10  | 1338   | 15  | 1326   | 26  | 1326   | 26   | 0.904977  |
| 13WSUN_81.FIN2  | 352   | 0.6    | 0.5235 | 0.0073 | 0.06702 | 0.00067 | 0.4523   | 427.3  | 4.9 | 418.2  | 4   | 461    | 22  | 418.2  | 4    | 2.129651  |
| 13WSUN_82.FIN2  | 112.6 | 1.18   | 5.347  | 0.061  | 0.3406  | 0.0033  | 0.34831  | 1876   | 9.8 | 1889   | 16  | 1870   | 12  | 1870   | 12   | 1.0166043 |
| 13WSUN_83.FIN2  | 113.9 | 2.221  | 2.761  | 0.029  | 0.2322  | 0.0023  | 0.29596  | 1344.4 | 7.7 | 1346   | 12  | 1344   | 12  | 1344   | 12   | 0.14881   |
| 13WSUN_84.FIN2  | 93.7  | 1.74   | 1.972  | 0.019  | 0.1904  | 0.0015  | 0.22323  | 1105.6 | 6.6 | 1123.5 | 8.4 | 1085   | 11  | 1123.5 | 8.4  | 1.61903   |
| 13WSUN_85.FIN2  | 14.05 | 0.1549 | 3.122  | 0.06   | 0.0526  | 0.0017  | 0.10203  | 1436   | 15  | 331    | 10  | 4049   | 23  | DISC   | DISC | 91.82514  |
| 13WSUN_86.FIN2  | 407   | 4.16   | 1.728  | 0.015  | 0.1752  | 0.0018  | 0.76987  | 1018.7 | 5.7 | 1040.5 | 9.7 | 985.5  | 7.7 | 1040.5 | 9.7  | 2.139982  |
| 13WSUN_86.FIN2  | 168.9 | 1.744  | 1.997  | 0.024  | 0.191   | 0.002   | 0.47458  | 1114.2 | 8.1 | 1127   | 11  | 1082   | 19  | 1127   | 11   | 1.148806  |
| 13WSUN_87.FIN2  | 189.5 | 1.274  | 0.1131 | 0.0038 | 0.01647 | 0.00019 | 0.16163  | 108.7  | 3.4 | 105.3  | 1.2 | 242    | 42  | 105.3  | 1.2  | 3.127875  |
| 13WSUN_88.FIN2  | 117   | 5.26   | 1.823  | 0.025  | 0.1789  | 0.0022  | 0.55625  | 1054.1 | 9.1 | 1061   | 12  | 1049   | 18  | 1061   | 12   | 0.654587  |
| 13WSUN_89.FIN2  | 41.67 | 1.731  | 3.296  | 0.047  | 0.2553  | 0.0026  | 0.3537   | 1479   | 11  | 1465   | 13  | 1499   | 17  | 1499   | 17   | 2.268179  |
| 13WSUN_90.FIN2  | 48.41 | 1.336  | 30.6   | 0.21   | 0.7387  | 0.0059  | 0.55814  | 3505.9 | 6.7 | 3568   | 22  | 3472   | 5   | 3472   | 5    | 2.764977  |
| 13WSUN_91.FIN2  | 161.3 | 16.3   | 0.637  | 0.017  | 0.0768  | 0.0011  | 0.3407   | 500    | 11  | 476.8  | 6.3 | 619    | 34  | 476.8  | 6.3  | 4.64      |
| 13WSUN_92.FIN2  | 115.7 | 1.72   | 1.846  | 0.034  | 0.1777  | 0.002   | 0.44678  | 1061   | 12  | 1054   | 11  | 1079   | 28  | 1054   | 11   | 0.659755  |
| 13WSUN_94.FIN2  | 124.7 | 1.462  | 1.844  | 0.022  | 0.1825  | 0.0017  | 0.02115  | 1060.6 | 7.8 | 1082   | 9.4 | 1044   | 27  | 1082   | 9.4  | 2.017726  |
| 13WSUN_95.FIN2  | 59    | 2.09   | 1.738  | 0.039  | 0.1745  | 0.0035  | 0.70262  | 1022   | 15  | 1037   | 19  | 1000   | 15  | 1037   | 19   | 1.46771   |
| 13WSUN_96.FIN2  | 50.1  | 0.566  | 1.874  | 0.023  | 0.1817  | 0.0019  | 0.30964  | 1071.2 | 8.1 | 1076   | 10  | 1080   | 16  | 1076   | 10   | 0.448096  |
| 13WSUN_97.FIN2  | 155.1 | 34.1   | 1.663  | 0.014  | 0.1686  | 0.0012  | 0.30618  | 994.5  | 5.2 | 1004.2 | 6.7 | 983    | 11  | 1004.2 | 6.7  | 0.975365  |
| 13WSUN_98.FIN2  | 49.9  | 0.5131 | 2.661  | 0.03   | 0.2234  | 0.0014  | 0.28514  | 1317   | 8.3 | 1299.5 | 7.3 | 1349   | 11  | 1349   | 11   | 3.669385  |
| 13WSUN_99.FIN2  | 57.5  | 1.34   | 2.651  | 0.042  | 0.2215  | 0.0029  | 0.60088  | 1314   | 12  | 1290   | 15  | 1350   | 15  | 1350   | 15   | 4.444444  |
| 13WSUN_100.FIN2 | 314   | 0.904  | 3.37   | 0.052  | 0.2435  | 0.0043  | 0.85573  | 1496   | 12  | 1404   | 23  | 1623   | 11  | 1623   | 11   | 13.49353  |
| 13WSUN_101.FIN2 | 231   | 2.06   | 4.73   | 0.042  | 0.3166  | 0.0034  | 0.80477  | 1772.1 | 7.5 | 1773   | 17  | 1780.8 | 6.2 | 1780.8 | 6.2  | 0.438005  |
| 13WSUN_102.FIN2 | 58.8  | 1.02   | 13.81  | 0.14   | 0.5244  | 0.0048  | 0.76595  | 2735.7 | 9.4 | 2717   | 20  | 2743.3 | 6.9 | 2743.3 | 6.9  | 0.958699  |
| 13WSUN_103.FIN2 | 347   | 14.3   | 0.578  | 0.012  | 0.0729  | 0.0014  | 0.80472  | 462.9  | 8   | 453.3  | 8.6 | 523    | 29  | 453.3  | 8.6  | 2.073882  |
| 13WSUN_103.FIN2 | 65.2  | 0.904  | 2.023  | 0.035  | 0.195   | 0.0022  | 0.27443  | 1125   | 11  | 1148   | 12  | 1074   | 18  | 1148   | 12   | 2.044444  |
| 13WSUN_104.FIN2 | 127   | 1.12   | 4.069  | 0.061  | 0.2909  | 0.0039  | 0.85398  | 1647   | 12  | 1645   | 19  | 1644   | 7.7 | 1644   | 7.7  | 0.060827  |
| 13WSUN_105.FIN2 | 99.9  | 1.93   | 4.658  | 0.05   | 0.3182  | 0.0031  | 0.79435  | 1759   | 9.1 | 1781   | 15  | 1728.2 | 7   | 1728.2 | 7    | 3.055202  |
| 13WSUN_106.FIN2 | 26.36 | 0.792  | 8.78   | 0.14   | 0.4103  | 0.0052  | 0.62832  | 2318   | 14  | 2216   | 24  | 2422   | 17  | 2422   | 17   | 8.505367  |
| 13WSUN_107.FIN2 | 185   | 0.929  | 0.5679 | 0.0085 | 0.07227 | 0.00075 | 0.32316  | 456.4  | 5.5 | 449.8  | 4.5 | 482    | 20  | 449.8  | 4.5  | 1.4461    |
| 13WSUN_108.FIN2 | 26.4  | 1.619  | 1.863  | 0.03   | 0.1807  | 0.0021  | 0.23432  | 1067   | 11  | 1071   | 11  | 1069   | 22  | 1071   | 11   | 0.374883  |
| 13WSUN_109.FIN2 | 156   | 1.016  | 5.086  | 0.055  | 0.3314  | 0.004   | 0.8516   | 1833.1 | 9.2 | 1847   | 19  | 1811.2 | 7.4 | 1811.2 | 7.4  | 1.97659   |
| 13WSUN_110.FIN2 | 75.1  | 0.827  | 1.721  | 0.025  | 0.1695  | 0.0019  | 0.30837  | 1015.5 | 9.4 | 1009   | 10  | 1035   | 15  | 1009   | 10   | 0.640079  |
| 13WSUN_111.FIN2 | 237   | 0.2809 | 7.224  | 0.041  | 0.4047  | 0.0023  | 0.75713  | 2139.3 | 5   | 2190   | 11  | 2102.7 | 4.4 | 2102.7 | 4.4  | 4.151805  |
| 13WSUN_112.FIN2 | 126   | 2.613  | 2.04   | 0.021  | 0.1924  | 0.0018  | 0.63598  | 1129.3 | 6.9 | 1134   | 9.7 | 1117   | 11  | 1134   | 9.7  | 0.416187  |
| 13WSUN_113.FIN2 | 254   | 1.498  | 3.386  | 0.039  | 0.2633  | 0.0034  | 0.72272  | 1500.7 | 9   | 1506   | 17  | 1510   | 11  | 1510   | 11   | 0.264901  |
| 13WSUN_114.FIN2 | 156.4 | 0.6818 | 3.057  | 0.021  | 0.2497  | 0.0022  | 0.52284  | 1421.7 | 5.2 | 1438   | 11  | 1413.9 | 9.5 | 1413.9 | 9.5  | 1.704505  |
| 13WSUN_115.FIN2 | 0.478 | 0.204  | 7.32   | 0.52   | 0.168   | 0.012   | 0.23549  | 2132   | 66  | 994    | 68  | 3540   | 100 | DISC   | DISC | 71.9209   |
| 13WSUN_116.FIN2 | 310   | 0.3741 | 0.2867 | 0.0038 | 0.04043 | 0.00035 | 0.31551  | 255.9  | 3   | 255.5  | 2.2 | 257    | 16  | 255.5  | 2.2  | 0.156311  |
| 13WSUN_117.FIN2 | 82.7  | 1.103  | 5.411  | 0.078  | 0.3462  | 0.0052  | 0.7148   | 1887   | 13  | 1919   | 26  | 1869   | 15  | 1869   | 15   | 2.675227  |
| 13WSUN_118.FIN2 | 146   | 1.839  | 3.684  | 0.055  | 0.2803  | 0.0043  | 0.9178   | 1568   | 12  | 1592   | 22  | 1536.2 | 7.8 | 1536.2 | 7.8  | 3.62324   |
| 13WSUN_119.FIN2 | 52.2  | 1.651  | 2.801  | 0.034  | 0.233   | 0.0027  | 0.45822  | 1356.3 | 9.4 | 1350   | 14  | 1350   | 16  | 1350   | 16   | 0         |
| 13WSUN_120.FIN2 | 262.4 | 2.14   | 2.377  | 0.015  | 0.2116  | 0.0012  | 0.61532  | 1235.5 | 4.6 | 1237.2 | 6.5 | 1222.3 | 6.9 | 1222.3 | 6.9  | 1.219013  |
|                 |       |        |        |        |         |         |          |        |     |        |     |        |     |        |      |           |
| 13WKEN_1.FIN2   | 55.6  | 1.134  | 1.706  | 0.029  | 0.1705  | 0.0015  | 0.52321  | 1010   | 11  | 1014.8 | 8.3 | 994    | 21  | 1014.8 | 8.3  | 0.475248  |
| 13WKEN_2.FIN2   | 226.4 | 1.169  | 0.0898 | 0.0018 | 0.01336 | 0.00017 | 0.060331 | 87.2   | 1.7 | 85.5   | 1.1 | 168    | 29  | 85.5   | 1.1  | 1.949541  |
| 13WKEN_3.FIN2   | 244   | 1.307  | 0.3663 | 0.0032 | 0.05036 | 0.00036 | 0.25909  | 316.8  | 2.4 | 316.7  | 2.2 | 324    | 14  | 316.7  | 2.2  | 0.031566  |
| 13WKEN_4.FIN2   | 205.3 | 4.477  | 1.68   | 0.012  | 0.1672  | 0.001   | 0.18678  | 1000.8 | 4.4 | 996.6  | 5.7 | 1003.1 | 9.5 | 996.6  | 5.7  | 0.419664  |
| 13WKEN_5.FIN2   | 174.9 | 1.323  | 6.188  | 0.073  | 0.3687  | 0.0025  | 0.76507  | 2002   | 10  | 2025   | 12  | 1982   | 11  | 1982   | 11   | 2.169526  |
| 13WKEN_6.FIN2   | 30.9  | 1.252  | 2.099  | 0.029  | 0.194   | 0.0021  | 0.25303  | 1147.6 | 9.5 | 1143   | 11  | 1144   | 18  | 1143   | 11   | 0.400837  |
| 13WKEN_7.FIN2   | 83.7  | 0.949  | 4.156  | 0.046  | 0.2978  | 0.0041  | 0        |        |     |        |     |        |     |        |      |           |

|                |       |        |        |        |         |         |          |        |     |        |      |        |     |        |      |          |
|----------------|-------|--------|--------|--------|---------|---------|----------|--------|-----|--------|------|--------|-----|--------|------|----------|
| 13WKEN_31.FIN2 | 142   | 1.002  | 4.71   | 0.047  | 0.3124  | 0.0028  | 0.75264  | 1768.5 | 8.3 | 1752   | 14   | 1796.2 | 7.7 | 1796.2 | 7.7  | 2.46075  |
| 13WKEN_32.FIN2 | 173   | 1.694  | 2.969  | 0.019  | 0.2462  | 0.0017  | 0.39024  | 1399.4 | 4.8 | 1418.5 | 8.6  | 1381.8 | 8.5 | 1381.8 | 8.5  | 2.655956 |
| 13WKEN_33.FIN2 | 27.6  | 0.747  | 11.36  | 0.16   | 0.4771  | 0.0057  | 0.31822  | 2555   | 13  | 2514   | 25   | 2582   | 12  | 2582   | 12   | 2.633617 |
| 13WKEN_34.FIN2 | 61.4  | 1.33   | 2.928  | 0.028  | 0.2441  | 0.0016  | 0.39968  | 1390.7 | 7.5 | 1408.1 | 8.2  | 1378   | 10  | 1378   | 10   | 2.184325 |
| 13WKEN_35.FIN2 | 172   | 1.35   | 4.396  | 0.072  | 0.3043  | 0.0046  | 0.93081  | 1710   | 14  | 1715   | 23   | 1717.7 | 5.3 | 1717.7 | 5.3  | 0.157187 |
| 13WKEN_36.FIN2 | 164.2 | 1.017  | 0.484  | 0.011  | 0.0622  | 0.0011  | 0.75892  | 400.1  | 7.4 | 389.1  | 6.9  | 495    | 27  | 389.1  | 6.9  | 2.749313 |
| 13WKEN_37.FIN2 | 449   | 5.54   | 4.23   | 0.047  | 0.2566  | 0.0028  | 0.80359  | 1679.3 | 9.2 | 1472   | 14   | 1963   | 11  | 1963   | 11   | 25.01274 |
| 13WKEN_38.FIN2 | 61.4  | 0.893  | 2.193  | 0.023  | 0.2028  | 0.0017  | 0.23877  | 1178.2 | 7.4 | 1190.5 | 8.9  | 1178   | 10  | 1190.5 | 8.9  | 1.043965 |
| 13WKEN_39.FIN2 | 112.8 | 1.321  | 3.53   | 0.038  | 0.2712  | 0.0022  | 0.61525  | 1533.6 | 8.4 | 1547   | 11   | 1522.1 | 8.5 | 1522.1 | 8.5  | 1.635898 |
| 13WKEN_40.FIN2 | 100.2 | 1.106  | 0.1217 | 0.004  | 0.01774 | 0.00036 | 0.031505 | 116.5  | 3.7 | 113.4  | 2.3  | 253    | 42  | 113.4  | 2.3  | 2.660944 |
| 13WKEN_41.FIN2 | 255   | 1.583  | 0.1168 | 0.0077 | 0.01478 | 0.00021 | 0.38161  | 111.7  | 6.9 | 94.6   | 1.4  | 550    | 110 | 94.6   | 1.4  | 15.30886 |
| 13WKEN_42.FIN2 | 124   | 10     | 0.452  | 0.017  | 0.059   | 0.0023  | 0.44688  | 378    | 12  | 370    | 14   | 465    | 56  | 370    | 14   | 2.116402 |
| 13WKEN_42.FIN2 | 148   | 1.74   | 0.614  | 0.012  | 0.0799  | 0.0013  | 0.53248  | 485.9  | 7.4 | 495.8  | 7.5  | 460    | 21  | 495.8  | 7.5  | 2.037456 |
| 13WKEN_43.FIN2 | 200   | 1.92   | 2.184  | 0.023  | 0.2032  | 0.0019  | 0.78191  | 1176.6 | 7.7 | 1192   | 10   | 1158.8 | 9.2 | 1192   | 10   | 1.308856 |
| 13WKEN_44.FIN2 | 21.17 | 1.568  | 1.757  | 0.053  | 0.1747  | 0.0043  | 0.66249  | 1029   | 20  | 1037   | 24   | 1045   | 25  | 1037   | 24   | 0.777454 |
| 13WKEN_45.FIN2 | 16.1  | 1.055  | 1.599  | 0.052  | 0.1589  | 0.004   | 0.54587  | 970    | 21  | 950    | 23   | 1003   | 34  | 950    | 23   | 2.061856 |
| 13WKEN_46.FIN2 | 142.1 | 0.821  | 0.9075 | 0.0091 | 0.10753 | 0.00064 | 0.22795  | 655.4  | 4.9 | 658.3  | 3.7  | 641    | 14  | 658.3  | 3.7  | 0.427155 |
| 13WKEN_47.FIN2 | 187.7 | 1.519  | 0.5628 | 0.0075 | 0.07255 | 0.00067 | 0.35036  | 453.1  | 4.9 | 451.5  | 4    | 467    | 20  | 451.5  | 4    | 0.353123 |
| 13WKEN_48.FIN2 | 130   | 1.0088 | 5.42   | 0.41   | 0.3035  | 0.0028  | 0.69485  | 1870   | 61  | 1708   | 14   | 2060   | 110 | 2060   | 110  | 17.08738 |
| 13WKEN_49.FIN2 | 107.7 | 1.879  | 4.365  | 0.035  | 0.3073  | 0.0022  | 0.68736  | 1706.4 | 6.4 | 1727   | 11   | 1678.9 | 7.6 | 1678.9 | 7.6  | 2.864971 |
| 13WKEN_50.FIN2 | 349   | 1.2    | 2.314  | 0.039  | 0.2055  | 0.0022  | 0.91757  | 1215   | 12  | 1205   | 12   | 1227   | 18  | 1227   | 18   | 1.792991 |
| 13WKEN_51.FIN2 | 103   | 0.766  | 1.586  | 0.095  | 0.0978  | 0.0015  | 0.70228  | 952    | 38  | 601.3  | 8.8  | 1892   | 90  | DISC   | DISC | 68.21882 |
| 13WKEN_52.FIN2 | 726   | 1.08   | 0.3431 | 0.0079 | 0.0393  | 0.0011  | 0.64102  | 299.4  | 6   | 248.5  | 6.8  | 700    | 46  | 248.5  | 6.8  | 17.00067 |
| 13WKEN_53.FIN2 | 42.4  | 0.5967 | 1.749  | 0.041  | 0.1689  | 0.0023  | 0.29994  | 1026   | 15  | 1006   | 13   | 1086   | 27  | 1006   | 13   | 1.949318 |
| 13WKEN_53.FIN2 | 23.2  | 0.629  | 1.899  | 0.042  | 0.185   | 0.0036  | 0.38095  | 1080   | 15  | 1094   | 20   | 1079   | 26  | 1094   | 20   | 1.296296 |
| 13WKEN_54.FIN2 | 127.6 | 1.386  | 2.291  | 0.019  | 0.2048  | 0.0016  | 0.47477  | 1210.1 | 6   | 1201.1 | 8.6  | 1224   | 11  | 1224   | 11   | 1.870915 |
| 13WKEN_55.FIN2 | 219   | 0.9183 | 2.844  | 0.02   | 0.2381  | 0.0017  | 0.60859  | 1366.9 | 5.3 | 1376.6 | 8.7  | 1355   | 6.8 | 1355   | 6.8  | 1.594096 |
| 13WKEN_56.FIN2 | 67.8  | 2.29   | 1.822  | 0.032  | 0.1808  | 0.0025  | 0.23753  | 1053   | 12  | 1071   | 14   | 1016   | 21  | 1071   | 14   | 1.709402 |
| 13WKEN_57.FIN2 | 40.2  | 0.94   | 0.749  | 0.018  | 0.0928  | 0.001   | 0.16256  | 568    | 10  | 572    | 5.9  | 547    | 25  | 572    | 5.9  | 0.704225 |
| 13WKEN_58.FIN2 | 451.1 | 1.409  | 3.481  | 0.051  | 0.2285  | 0.0031  | 0.93007  | 1522   | 11  | 1327   | 16   | 1802.5 | 5.3 | 1802.5 | 5.3  | 26.38003 |
| 13WKEN_59.FIN2 | 55.6  | 0.894  | 2.838  | 0.038  | 0.2334  | 0.0031  | 0.71462  | 1366   | 10  | 1354   | 16   | 1393   | 11  | 1393   | 11   | 2.799713 |
| 13WKEN_60.FIN2 | 149   | 1.39   | 4.485  | 0.043  | 0.3057  | 0.003   | 0.71704  | 1729   | 7.8 | 1719   | 15   | 1740.2 | 6.5 | 1740.2 | 6.5  | 1.218251 |
| 13WKEN_61.FIN2 | 371.6 | 1.208  | 0.1201 | 0.0035 | 0.01618 | 0.00015 | 0.17765  | 115.1  | 3.1 | 103.46 | 0.97 | 406    | 55  | 103.46 | 0.97 | 10.11295 |
| 13WKEN_62.FIN2 | 365   | 1.176  | 0.1134 | 0.0019 | 0.01651 | 0.00017 | 0.26483  | 109.1  | 1.8 | 105.6  | 1.1  | 201    | 25  | 105.6  | 1.1  | 3.208066 |
| 13WKEN_63.FIN2 | 83    | 1.093  | 2.022  | 0.032  | 0.1928  | 0.0023  | 0.56641  | 1122   | 11  | 1136   | 13   | 1117   | 17  | 1136   | 13   | 1.247772 |
| 13WKEN_64.FIN2 | 345   | 0.619  | 2.758  | 0.021  | 0.2308  | 0.0019  | 0.95329  | 1343.9 | 5.8 | 1339   | 10   | 1349   | 5.7 | 1349   | 5.7  | 0.74129  |
| 13WKEN_65.FIN2 | 235   | 0.606  | 0.1121 | 0.0029 | 0.01644 | 0.00019 | 0.037236 | 107.8  | 2.6 | 105.1  | 1.2  | 210    | 29  | 105.1  | 1.2  | 2.504638 |
| 13WKEN_66.FIN2 | 19.8  | 0.3325 | 3.098  | 0.049  | 0.2471  | 0.003   | 0.32153  | 1434   | 12  | 1423   | 15   | 1433   | 17  | 1433   | 17   | 0.697837 |
| 13WKEN_67.FIN2 | 49.2  | 0.8248 | 1.697  | 0.02   | 0.1705  | 0.0015  | 0.22976  | 1006.9 | 7.5 | 1014.5 | 8.2  | 985    | 15  | 1014.5 | 8.2  | 0.754792 |
| 13WKEN_68.FIN2 | 29.28 | 0.649  | 5.377  | 0.068  | 0.3363  | 0.0041  | 0.5383   | 1880   | 11  | 1868   | 20   | 1885   | 13  | 1885   | 13   | 0.901857 |
| 13WKEN_69.FIN2 | 136.7 | 1.311  | 1.93   | 0.014  | 0.1862  | 0.0014  | 0.38694  | 1092   | 5   | 1100.4 | 7.5  | 1083.3 | 9.1 | 1100.4 | 7.5  | 0.769231 |
| 13WKEN_70.FIN2 | 257   | 3.71   | 0.782  | 0.02   | 0.0904  | 0.0014  | 0.77453  | 585    | 12  | 557.6  | 8.1  | 683    | 31  | 557.6  | 8.1  | 4.683761 |
| 13WKEN_71.FIN2 | 88.2  | 0.8    | 2.837  | 0.032  | 0.2324  | 0.0027  | 0.61332  | 1366.1 | 8.1 | 1348   | 14   | 1396   | 11  | 1396   | 11   | 3.438395 |
| 13WKEN_72.FIN2 | 132.1 | 0.985  | 1.935  | 0.016  | 0.1886  | 0.0014  | 0.6375   | 1093   | 5.4 | 1113.6 | 7.4  | 1058.7 | 8.2 | 1113.6 | 7.4  | 1.884721 |
| 13WKEN_73.FIN2 | 194.5 | 1.464  | 0.0877 | 0.0025 | 0.01276 | 0.00019 | 0.06063  | 85.3   | 2.4 | 81.7   | 1.2  | 231    | 34  | 81.7   | 1.2  | 4.220399 |
| 13WKEN_74.FIN2 | 33.91 | 0.675  | 5.312  | 0.061  | 0.3408  | 0.0033  | 0.5037   | 1870   | 9.8 | 1890   | 16   | 1843   | 11  | 1843   | 11   | 2.55019  |
| 13WKEN_75.FIN2 | 336   | 0.808  | 0.0875 | 0.002  | 0.01332 | 0.00017 | 0.026174 | 85.1   | 1.9 | 85.3   | 1.1  | 178    | 31  | 85.3   | 1.1  | 0.235018 |
| 13WKEN_76.FIN2 | 119   | 1.75   | 2.21   | 0.019  | 0.2041  | 0.0014  | 0.56931  | 1183.8 | 6   | 1197.3 | 7.3  | 1159.9 | 8.8 | 1197.3 | 7.3  | 1.140395 |
| 13WKEN_77.FIN2 | 36.5  | 1.129  | 2.66   | 0.028  | 0.2307  | 0.0021  | 0.074818 | 1316.8 | 7.9 | 1338   | 11   | 1293   | 16  | 1293   | 16   | 3.480278 |
| 13WKEN_78.FIN2 | 516   | 1.098  | 0.0839 | 0.0019 | 0.0128  | 0.00019 | 0.28177  | 81.8   | 1.8 | 82     | 1.2  | 154    | 33  | 82     | 1.2  | 0.244499 |
| 13WKEN_79.FIN2 | 358   | 1.594  | 3.038  | 0.017  | 0.2499  | 0.0015  | 0.54851  | 1417   | 4.3 | 1437.7 | 7.5  | 1390.1 | 6.8 | 1390.1 | 6.8  | 3.424214 |
| 13WKEN_80.FIN2 | 214.8 | 2.044  | 4.309  | 0.026  | 0.2984  | 0.0021  | 0.69751  | 1694.9 | 5   | 1683   | 10   | 1716.5 | 6   | 1716.5 | 6    | 1.951646 |
| 13WKEN_81.FIN2 | 34.3  | 1.222  | 2.778  | 0.039  | 0.2373  | 0.0028  | 0.25028  | 1349   | 11  | 1372   | 14   | 1323   | 17  | 1323   | 17   | 3.703704 |
| 13WKEN_82.FIN2 | 162   | 1.58   | 5.126  | 0.041  | 0.3335  | 0.0031  | 0.78089  | 1840   | 6.9 | 1855   | 15   | 1836.2 | 6.6 | 1836.2 | 6.6  | 1.023854 |
| 13WKEN_83.FIN2 | 305.8 | 1.374  | 1.868  | 0.013  | 0.1827  | 0.0012  | 0.60238  | 1070.3 | 4.6 | 1081.4 | 6.4  | 1059   | 6.8 | 1081.4 | 6.4  | 1.037092 |
| 13WKEN_84.FIN2 | 161   | 1.9    | 3.624  | 0.032  | 0.2751  | 0.0021  | 0.74509  | 1554.3 | 7.1 | 1566   | 11   | 1548.3 | 5.7 | 1548.3 | 5.7  | 1.143189 |
| 13WKEN_85.FIN2 | 122.1 | 1.244  | 1.848  | 0.017  | 0.1822  | 0.0014  | 0.52506  | 1062.4 | 6   | 1079.1 | 7.5  | 1043   | 11  | 1079.1 | 7.5  | 1.571913 |
| 13WKEN_86.FIN2 | 68    | 0.669  | 1.686  | 0.019  | 0.168   | 0.0016  | 0.45915  | 1003.7 | 7.2 | 1000.8 | 8.8  | 1032   | 15  | 1000.8 | 8.8  | 0.288931 |
| 13WKEN_87.FIN2 | 366   | 1.677  | 0.1007 | 0.0022 | 0.01538 | 0.00018 | 0.41427  | 97.7   | 2   | 98.4   | 1.1  | 162    | 22  | 98.4   | 1.1  | 0.716479 |
| 13WKEN_88.FIN2 | 80    | 1.521  | 1.765  | 0.021  | 0.1742  | 0.0014  | 0.43834  | 1032.2 | 7.5 | 1035.3 | 7.5  | 1018   | 12  | 1035.3 | 7.5  | 0.300329 |
| 13WKEN_89.FIN2 | 68.64 | 2.656  | 13.08  | 0.076  | 0.5191  | 0.0039  | 0.49988  | 2685.8 | 5.3 | 2695   | 17   | 2678   | 7.4 | 2678   | 7.4  | 0.634802 |
| 13WKEN_90.FIN2 | 78.5  | 2.988  | 4.653  | 0.042  | 0.3199  | 0.0031  | 0.73242  | 1758.3 | 7.4 | 1789   | 15   | 1721.4 | 9   | 1721.4 | 9    | 3.927036 |
| 13WKEN_91.FIN2 | 128.8 | 0.988  | 4.233  | 0.055  | 0.2973  | 0.0038  | 0.87718  | 1680   | 11  | 1678   | 19   | 1682   | 7.2 | 1682   | 7.2  | 0.237812 |
| 13WKEN_92.FIN2 | 81.8  | 0.4624 | 6.59   | 0.075  | 0.3697  | 0.0039  | 0.73085  | 2058.3 | 9.9 | 2027   | 18   | 2080.9 | 6.7 | 2080.9 | 6.7  | 2.590225 |
| 13WKEN_93.FIN2 | 62.4  | 1.191  | 4.716  | 0.037  | 0.3172  | 0.0025  | 0.37668  | 1769.7 | 6.7 | 1776   | 12   | 1766.4 | 9.6 | 1766.4 | 9.6  | 0.543478 |
| 13WKEN_94.FIN2 | 33.2  | 0.798  | 6.919  | 0.065  | 0.3947  | 0.0049  | 0.61764  | 2100.5 | 8.4 | 2144   | 23   | 2057   | 13  | 2057   | 13   | 4.22946  |
| 13WKEN_95.FIN2 | 96.6  | 1.732  | 0.895  | 0.025  | 0.0881  | 0.0012  | 0.1628   | 649    | 14  | 544.4  | 7.2  | 1034   | 68  | 544.4  | 7.2  | 16.1171  |
| 13WKEN_96.FIN2 | 107.7 | 0.811  | 0.758  | 0.012  | 0.0902  | 0.0012  | 0.63707  | 572.5  | 7.1 | 557.9  | 7.3  | 638    | 18  | 557.9  | 7.3  | 2.550218 |
| 13WKEN_97.FIN2 | 141.7 | 1.269  | 4.21   | 0.025  | 0.3061  | 0.002   | 0.55993  | 1675.8 | 4.8 | 1721.4 | 9.9  | 1625.3 | 6.3 | 1625.3 | 6.3  | 5.912755 |
| 13WKEN_98.FIN2 | 390   | 2.15   | 2.352  | 0.011  | 0.2125  | 0.0011  | 0.47279  | 1228.6 | 3.4 | 1242.2 | 6.1  | 1210.4 | 6.1 | 1210.4 | 6.1  | 2.627231 |
| 13WKEN_99.FIN2 | 142.7 | 1.0266 | 4.296  | 0.036  | 0.2998  | 0.0031  | 0.71755  | 1692.1 | 6.9 | 1690   | 15   | 1697.3 | 7.3 | 1697   |      |          |

## Mount Garfield, CO

| Sample Name:    |         | 207/235 |         |          |         | 206/238  |          |        |          | 206/207  |          |          |          | Best age |          | % Discordance* |
|-----------------|---------|---------|---------|----------|---------|----------|----------|--------|----------|----------|----------|----------|----------|----------|----------|----------------|
| Grain #         | [U] ppm | U/Th    | 207/235 | 2σ error | 206/238 | 2σ error | RHO      | Age Ma | 2σ error | Age (Ma) | 2σ error | Age (Ma) | 2σ error | (Ma)     | 2σ error |                |
| 13GJR01_1.FIN2  | 361     | 2.02    | 0.0827  | 0.0023   | 0.01238 | 0.00015  | 0.3403   | 80.1   | 1.9      | 79.3     | 0.96     | 165      | 31       | 79.3     | 0.96     | 0.998752       |
| 13GJR01_2.FIN2  | 154.9   | 0.498   | 0.5137  | 0.0066   | 0.06781 | 0.00066  | 0.2628   | 420.7  | 4.4      | 422.9    | 4        | 421      | 19       | 422.9    | 4        | 0.522938       |
| 13GJR01_3.FIN2  | 246     | 1.159   | 5.09    | 0.19     | 0.3188  | 0.0028   | 0.54712  | 1828   | 28       | 1785     | 13       | 1882     | 52       | 1882     | 52       | 5.154091       |
| 13GJR01_4.FIN2  | 1144    | 4.304   | 0.0928  | 0.0012   | 0.01402 | 0.00011  | 0.23787  | 90.1   | 1.1      | 89.78    | 0.7      | 118      | 15       | 89.78    | 0.7      | 0.355161       |
| 13GJR01_5.FIN2  | 313     | 0.596   | 1.978   | 0.064    | 0.1636  | 0.0053   | 0.96994  | 1109   | 22       | 981      | 30       | 1377     | 9.5      | 981      | 30       | 11.54193       |
| 13GJR01_6.FIN2  | 99.3    | 0.9643  | 4.485   | 0.04     | 0.3101  | 0.0027   | 0.49122  | 1727.9 | 7.3      | 1741     | 13       | 1707     | 11       | 1707     | 11       | 1.991798       |
| 13GJR01_7.FIN2  | 298     | 1.27    | 2.985   | 0.029    | 0.2444  | 0.0028   | 0.83204  | 1403.2 | 7.5      | 1409     | 14       | 1392     | 8.5      | 1392     | 8.5      | 1.221264       |
| 13GJR01_8.FIN2  | 267     | 1.158   | 0.0732  | 0.0018   | 0.01126 | 0.00015  | 0.036709 | 71.7   | 1.7      | 72.15    | 0.97     | 148      | 27       | 72.15    | 0.97     | 0.627615       |
| 13GJR01_9.FIN2  | 225     | 0.921   | 0.7373  | 0.008    | 0.09011 | 0.00084  | 0.46416  | 560.6  | 4.7      | 556.2    | 4.9      | 577      | 11       | 556.2    | 4.9      | 0.784873       |
| 13GJR01_10.FIN2 | 234.2   | 2.98    | 3.541   | 0.063    | 0.2324  | 0.0049   | 0.6722   | 1536   | 14       | 1347     | 26       | 1810     | 25       | 1810     | 25       | 25.58011       |
| 13GJR01_11.FIN2 | 468.1   | 2.192   | 4.307   | 0.033    | 0.2856  | 0.0022   | 0.70364  | 1694.4 | 6.2      | 1619     | 11       | 1785.2   | 8.4      | 1785.2   | 8.4      | 9.309881       |
| 13GJR01_12.FIN2 | 31.21   | 0.587   | 0.706   | 0.022    | 0.0837  | 0.0017   | 0.32063  | 543    | 13       | 518      | 10       | 678      | 47       | 518      | 10       | 0.460452       |
| 13GJR01_13.FIN2 | 87.4    | 1.699   | 1.887   | 0.025    | 0.1833  | 0.0019   | 0.67091  | 1078.1 | 9        | 1085     | 10       | 1059     | 12       | 1085     | 10       | 0.640015       |
| 13GJR01_14.FIN2 | 264     | 1.406   | 0.1027  | 0.0021   | 0.01499 | 0.00021  | 0.24527  | 99.2   | 1.9      | 95.9     | 1.3      | 206      | 28       | 95.9     | 1.3      | 3.326613       |
| 13GJR01_15.FIN2 | 251     | 1.332   | 0.0776  | 0.0019   | 0.01184 | 0.00016  | 0.15366  | 75.9   | 1.8      | 75.88    | 0.99     | 173      | 32       | 75.88    | 0.99     | 0.02635        |
| 13GJR01_16.FIN2 | 820     | 1.66    | 0.0964  | 0.002    | 0.01463 | 0.00023  | 0.06535  | 93.4   | 1.8      | 93.6     | 1.5      | 128      | 20       | 93.6     | 1.5      | 0.214133       |
| 13GJR01_17.FIN2 | 31.6    | 0.4911  | 11.98   | 0.14     | 0.5105  | 0.0052   | 0.63551  | 2602   | 11       | 2658     | 22       | 2558     | 11       | 2558     | 11       | 1.909304       |
| 13GJR01_18.FIN2 | 45.6    | 0.6772  | 0.735   | 0.014    | 0.0891  | 0.0011   | 0.14452  | 558.7  | 8.1      | 550      | 6.2      | 600      | 26       | 550      | 6.2      | 1.557186       |
| 13GJR01_19.FIN2 | 57.4    | 0.917   | 1.903   | 0.03     | 0.1811  | 0.0026   | 0.64804  | 1081   | 10       | 1073     | 14       | 1123     | 15       | 1073     | 14       | 0.740056       |
| 13GJR01_20.FIN2 | 83.2    | 6.6     | 1.614   | 0.02     | 0.1627  | 0.0015   | 0.41925  | 975.1  | 7.7      | 971.8    | 8.4      | 1002     | 17       | 971.8    | 8.4      | 0.338427       |
| 13GJR01_21.FIN2 | 62.8    | 2.452   | 3.798   | 0.038    | 0.2797  | 0.002    | 0.38639  | 1593.1 | 8.3      | 1592     | 10       | 1594     | 13       | 1594     | 13       | 0.125471       |
| 13GJR01_22.FIN2 | 311     | 1.691   | 0.11    | 0.0025   | 0.01674 | 0.00024  | 0.19551  | 105.9  | 2.3      | 107      | 1.5      | 150      | 25       | 107      | 1.5      | 1.038716       |
| 13GJR01_23.FIN2 | 289     | 2.02    | 0.0801  | 0.0022   | 0.01205 | 0.00016  | 0.22285  | 78.2   | 2.1      | 77.2     | 1        | 185      | 31       | 77.2     | 1        | 1.278772       |
| 13GJR01_24.FIN2 | 141     | 2.77    | 0.877   | 0.017    | 0.1042  | 0.0018   | 0.75612  | 638.7  | 9.1      | 639      | 10       | 629      | 20       | 639      | 10       | 0.04697        |
| 13GJR01_25.FIN2 | 109     | 1.19    | 8.58    | 0.14     | 0.406   | 0.005    | 0.77644  | 2294   | 15       | 2196     | 23       | 2371     | 17       | 2371     | 17       | 7.380852       |
| 13GJR01_26.FIN2 | 216     | 1.98    | 1.709   | 0.069    | 0.1375  | 0.0057   | 0.83391  | 1010   | 26       | 830      | 33       | 1472     | 17       | 830      | 33       | 17.82178       |
| 13GJR01_26.FIN2 | 231.4   | 0.91    | 2.89    | 0.13     | 0.222   | 0.01     | 0.97009  | 1383   | 37       | 1290     | 53       | 1555     | 18       | 1555     | 18       | 17.0418        |
| 13GJR01_27.FIN2 | 321.3   | 1.761   | 0.0841  | 0.0041   | 0.01272 | 0.00039  | 0.60093  | 82     | 3.8      | 81.5     | 2.5      | 154      | 50       | 81.5     | 2.5      | 0.609756       |
| 13GJR01_28.FIN2 | 236     | 1.431   | 0.0923  | 0.0023   | 0.01394 | 0.00024  | 0.037697 | 89.6   | 2.1      | 89.3     | 1.5      | 149      | 25       | 89.3     | 1.5      | 0.343821       |
| 13GJR01_29.FIN2 | 78.6    | 0.811   | 0.0994  | 0.0039   | 0.01444 | 0.00031  | 0.052974 | 96.1   | 3.6      | 92.4     | 1.9      | 269      | 51       | 92.4     | 1.9      | 3.850156       |
| 13GJR01_30.FIN2 | 77.9    | 2.286   | 4.933   | 0.038    | 0.3331  | 0.0023   | 0.50778  | 1807.6 | 6.5      | 1853     | 11       | 1766.9   | 7.8      | 1766.9   | 7.8      | 4.872941       |
| 13GJR01_31.FIN2 | 128.8   | 0.574   | 12.69   | 0.14     | 0.5151  | 0.0048   | 0.81361  | 2657   | 10       | 2680     | 20       | 2649.1   | 5.4      | 2649.1   | 5.4      | 1.166434       |
| 13GJR01_32.FIN2 | 127.4   | 2.641   | 4.581   | 0.044    | 0.3113  | 0.0029   | 0.67995  | 1745.2 | 8        | 1747     | 14       | 1748.3   | 7.4      | 1748.3   | 7.4      | 0.074358       |
| 13GJR01_33.FIN2 | 47.1    | 1.634   | 0.88    | 0.016    | 0.1056  | 0.0015   | 0.31221  | 641.6  | 8.7      | 647.1    | 8.6      | 622      | 27       | 647.1    | 8.6      | 0.857232       |
| 13GJR01_34.FIN2 | 242     | 0.819   | 0.5101  | 0.0063   | 0.06635 | 0.00059  | 0.39859  | 418.4  | 4.3      | 414.1    | 3.5      | 445      | 16       | 414.1    | 3.5      | 1.027725       |
| 13GJR01_35.FIN2 | 236.5   | 1.316   | 6.257   | 0.039    | 0.3672  | 0.0025   | 0.63827  | 2012.2 | 5.4      | 2016     | 12       | 2010.8   | 6        | 2010.8   | 6        | 0.258604       |
| 13GJR01_36.FIN2 | 135.5   | 1.953   | 4.704   | 0.038    | 0.3132  | 0.0028   | 0.63688  | 1767.5 | 6.7      | 1756     | 14       | 1776.7   | 7.9      | 1776.7   | 7.9      | 1.165081       |
| 13GJR01_37.FIN2 | 157.2   | 2.37    | 1.77    | 0.02     | 0.1749  | 0.0017   | 0.53064  | 1036.1 | 7.5      | 1038.9   | 9.4      | 1024     | 15       | 1038.9   | 9.4      | 0.270244       |
| 13GJR01_38.FIN2 | 184.5   | 2.96    | 2.323   | 0.036    | 0.2029  | 0.0022   | 0.82949  | 1218   | 11       | 1191     | 12       | 1265     | 13       | 1191     | 12       | 2.216749       |
| 13GJR01_39.FIN2 | 394     | 0.68    | 3.724   | 0.052    | 0.2683  | 0.0032   | 0.86585  | 1577   | 11       | 1532     | 16       | 1641.7   | 9.2      | 1641.7   | 9.2      | 6.682098       |
| 13GJR01_40.FIN2 | 240     | 7.7     | 0.5373  | 0.0054   | 0.06976 | 0.00057  | 0.11809  | 436.6  | 3.6      | 434.7    | 3.4      | 436      | 16       | 434.7    | 3.4      | 0.435181       |
| 13GJR01_41.FIN2 | 202     | 3.51    | 0.0826  | 0.0027   | 0.01253 | 0.00018  | 0.086082 | 80.5   | 2.5      | 80.3     | 1.2      | 209      | 48       | 80.3     | 1.2      | 0.248447       |
| 13GJR01_42.FIN2 | 212     | 1.192   | 0.0993  | 0.0027   | 0.01538 | 0.00022  | 0.063198 | 96.1   | 2.5      | 98.4     | 1.4      | 140      | 30       | 98.4     | 1.4      | 2.39334        |
| 13GJR01_43.FIN2 | 150.3   | 1.292   | 15.84   | 0.11     | 0.5769  | 0.0038   | 0.54493  | 2867.8 | 6.3      | 2936     | 15       | 2818.3   | 7.4      | 2818.3   | 7.4      | 4.176276       |
| 13GJR01_44.FIN2 | 116     | 0.778   | 3.184   | 0.053    | 0.2351  | 0.0035   | 0.54744  | 1453   | 13       | 1361     | 18       | 1598     | 17       | 1598     | 17       | 14.83104       |
| 13GJR01_44.FIN2 | 82.2    | 0.45    | 4.087   | 0.042    | 0.2951  | 0.0045   | 0.50869  | 1651.4 | 8.4      | 1667     | 22       | 1632     | 15       | 1632     | 15       | 2.144608       |
| 13GJR01_45.FIN2 | 1129    | 1.022   | 4.28    | 0.017    | 0.299   | 0.0017   | 0.57282  | 1689.4 | 3.3      | 1686.3   | 8.5      | 1698.4   | 4.6      | 1698.4   | 4.6      | 0.712435       |
| 13GJR01_46.FIN2 | 106.6   | 1.707   | 2.869   | 0.027    | 0.2328  | 0.0021   | 0.58873  | 1373.3 | 7.1      | 1349     | 11       | 1405     | 9.7      | 1405     | 9.7      | 3.985765       |
| 13GJR01_47.FIN2 | 32.3    | 0.499   | 3.295   | 0.036    | 0.2567  | 0.003    | 0.16182  | 1479.2 | 8.5      | 1473     | 16       | 1491     | 18       | 1491     | 18       | 1.207243       |
| 13GJR01_48.FIN2 | 88.7    | 2.24    | 0.555   | 0.014    | 0.0714  | 0.0014   | 0.74183  | 447.8  | 9.3      | 444.2    | 8.6      | 475      | 24       | 444.2    | 8.6      | 0.80393        |
| 13GJR01_49.FIN2 | 137.6   | 1.725   | 0.1154  | 0.0034   | 0.01523 | 0.00028  | 0.11406  | 110.8  | 3.1      | 97.5     | 1.8      | 404      | 47       | 97.5     | 1.8      | 12.00361       |
| 13GJR01_50.FIN2 | 747     | 2.377   | 0.1013  | 0.0016   | 0.01527 | 0.00023  | 0.49615  | 98     | 1.5      | 97.7     | 1.5      | 146      | 21       | 97.7     | 1.5      | 0.306122       |
| 13GJR01_51.FIN2 | 1003    | 1.985   | 0.1596  | 0.0016   | 0.02365 | 0.00023  | 0.56183  | 150.3  | 1.4      | 150.7    | 1.4      | 146      | 12       | 150.7    | 1.4      | 0.266134       |
| 13GJR01_52.FIN2 | 120.8   | 2.42    | 4.586   | 0.041    | 0.3145  | 0.0032   | 0.61721  | 1746.4 | 7.5      | 1763     | 16       | 1724     | 8.7      | 1724     | 8.7      | 2.262181       |
| 13GJR01_53.FIN2 | 246     | 1.129   | 0.1052  | 0.0032   | 0.0156  | 0.00025  | 0.30131  | 101.4  | 2.9      | 99.8     | 1.6      | 167      | 31       | 99.8     | 1.6      | 1.577909       |
| 13GJR01_54.FIN2 | 81.6    | 2.04    | 1.577   | 0.022    | 0.164   | 0.0017   | 0.2628   | 960.6  | 8.6      | 978.8    | 9.3      | 917      | 18       | 978.8    | 9.3      | 1.894649       |
| 13GJR01_55.FIN2 | 98.8    | 1.353   | 0.0937  | 0.0032   | 0.01263 | 0.00025  | 0.20681  | 90.9   | 3        | 80.9     | 1.6      | 402      | 41       | 80.9     | 1.6      | 11.0011        |
| 13GJR01_56.FIN2 | 278.6   | 1.37    | 0.078   | 0.0018   | 0.0119  | 0.0017   | 0.056267 | 76.2   | 1.7      | 76.3     | 1.1      | 149      | 29       | 76.3     | 1.1      | 0.131234       |
| 13GJR01_57.FIN2 | 136     | 3.463   | 4.999   | 0.037    | 0.3305  | 0.0024   | 0.69988  | 1818.8 | 6.2      | 1841     | 12       | 1792.1   | 5.8      | 1792.1   | 5.8      | 2.728642       |
| 13GJR01_58.FIN2 | 584     | 3.38    | 0.1005  | 0.0015   | 0.01534 | 0.00015  | 0.13005  | 97.2   | 1.4      | 98.14    | 0.98     | 114      | 17       | 98.14    | 0.98     | 0.967078       |
| 13GJR01_59.FIN2 | 132     | 1.462   | 2.143   | 0.017    | 0.2027  | 0.0016   | 0.14444  | 1162.4 | 5.6      | 1189.8   | 8.4      | 1119     | 13       | 1189.8   | 8.4      | 2.357192       |
| 13GJR01_60.FIN2 | 248     | 1.055   | 1.998   | 0.014    | 0.1928  | 0.0014   | 0.48086  | 1115.2 | 4.8      | 1136.5   | 7.3      | 1086     | 7.8      | 1136.5   | 7.3      | 1.909971       |
| 13GJR01_61.FIN2 | 97.2    | 1.3     | 9.77    | 0.18     | 0.4004  | 0.0057   | 0.86221  | 2413   | 17       | 2170     | 26       | 2631     | 13       | 2631     | 13       | 17.52185       |
| 13GJR01_62.FIN2 | 153.1   | 1.495   | 2.754   | 0.024    | 0.2294  | 0.0016   | 0.46478  | 1342.9 | 6.5      | 1331.5   | 8.3      | 1370     | 10       | 1370     | 10       | 2.810219       |
| 13GJR01_63.FIN2 | 216     | 1.195   | 0.0988  | 0.0027   | 0.01484 | 0.00027  | 0.36912  | 95.7   | 2.5      | 94.9     | 1.7      | 170      | 25       | 94.9     | 1.7      | 0.835946       |
| 13GJR01_64.FIN2 | 103.9   | 0.826   | 0.0919  | 0.004    | 0.01222 | 0.00032  | 0.34619  | 89.1   | 3.7      | 78.3     | 2.1      | 416      | 54       | 78.3     | 2.1      | 12.12121       |
| 13GJR01_65.FIN2 | 294     | 1.81    | 0.0803  | 0.0019   | 0.01231 | 0.00018  | 0.18304  | 78.9   | 1.7      | 78.9     | 1.2      | 158      | 27       | 78.9     | 1.2      | 0              |
| 13GJR01_66.FIN2 | 137.2   | 1.42    | 3.977   | 0.079    | 0.2788  | 0.0055   | 0.75904  | 1632   | 17       | 1585     | 27       | 1696     | 12       | 1696     | 12       | 6.544811       |
| 13GJR01_67.FIN2 | 467     | 2.216   | 0.0947  | 0.0017   | 0.01425 | 0.00014  | 0.075494 |        |          |          |          |          |          |          |          |                |

|                  |       |        |         |         |         |         |          |        |      |        |      |        |     |        |      |          |
|------------------|-------|--------|---------|---------|---------|---------|----------|--------|------|--------|------|--------|-----|--------|------|----------|
| 13GJR01_89.FIN2  | 231.6 | 4.19   | 0.079   | 0.0018  | 0.01202 | 0.00015 | 0.085737 | 77.2   | 1.7  | 77     | 0.97 | 177    | 27  | 77     | 0.97 | 0.259067 |
| 13GJR01_90.FIN2  | 207   | 1.253  | 0.8416  | 0.0086  | 0.10061 | 0.00095 | 0.63791  | 619.8  | 4.7  | 617.9  | 5.6  | 607    | 10  | 617.9  | 5.6  | 0.306551 |
| 13GJR01_91.FIN2  | 523   | 1.333  | 2.821   | 0.078   | 0.2301  | 0.0066  | 0.91162  | 1361   | 21   | 1339   | 34   | 1410   | 12  | 1410   | 12   | 5.035461 |
| 13GJR01_92.FIN2  | 186.6 | 1.491  | 0.9408  | 0.0098  | 0.10941 | 0.00093 | 0.46049  | 673.7  | 5.2  | 669.3  | 5.4  | 670    | 13  | 669.3  | 5.4  | 0.65311  |
| 13GJR01_93.FIN2  | 167   | 2.656  | 4.565   | 0.035   | 0.3162  | 0.0027  | 0.72961  | 1742.6 | 6.4  | 1771   | 13   | 1705.1 | 6   | 1705.1 | 6    | 3.864876 |
| 13GJR01_94.FIN2  | 96.5  | 1.183  | 0.54    | 0.01    | 0.06916 | 0.00087 | 0.21711  | 438.3  | 6.9  | 431.1  | 5.2  | 473    | 26  | 431.1  | 5.2  | 1.64271  |
| 13GJR01_95.FIN2  | 1362  | 3.2    | 0.08551 | 0.00099 | 0.01311 | 0.00012 | 0.3092   | 83.3   | 0.93 | 84.05  | 0.75 | 96     | 12  | 84.05  | 0.75 | 0.90036  |
| 13GJR01_96.FIN2  | 573   | 5.68   | 4.411   | 0.031   | 0.305   | 0.0023  | 0.80771  | 1714.1 | 5.9  | 1717   | 11   | 1712.1 | 5.1 | 1712.1 | 5.1  | 0.286198 |
| 13GJR01_97.FIN2  | 73.32 | 1.771  | 6.614   | 0.048   | 0.373   | 0.0028  | 0.31728  | 2060.9 | 6.3  | 2043   | 13   | 2078   | 11  | 2078   | 11   | 1.684312 |
| 13GJR01_98.FIN2  | 30.3  | 0.882  | 2.66    | 0.033   | 0.228   | 0.0028  | 0.41592  | 1318.9 | 9.3  | 1323   | 15   | 1330   | 14  | 1330   | 14   | 0.526316 |
| 13GJR01_99.FIN2  | 117   | 2.274  | 4.8     | 0.028   | 0.3304  | 0.0022  | 0.53407  | 1785.4 | 5.1  | 1840   | 11   | 1734   | 6.7 | 1734   | 6.7  | 6.113033 |
| 13GJR01_100.FIN2 | 297   | 3.464  | 4.816   | 0.031   | 0.3242  | 0.0025  | 0.7377   | 1787.4 | 5.5  | 1810   | 12   | 1761.5 | 5   | 1761.5 | 5    | 2.753335 |
| 13GJR01_101.FIN2 | 75.6  | 1.04   | 12.252  | 0.075   | 0.5195  | 0.0049  | 0.44966  | 2625.1 | 5.5  | 2696   | 21   | 2578.3 | 8.6 | 2578.3 | 8.6  | 4.565023 |
| 13GJR01_102.FIN2 | 155.2 | 2.05   | 3.312   | 0.027   | 0.2628  | 0.0022  | 0.59705  | 1483.5 | 6.3  | 1505   | 11   | 1461.6 | 6.7 | 1461.6 | 6.7  | 2.969349 |
| 13GJR01_103.FIN2 | 182.7 | 1.903  | 4.404   | 0.04    | 0.2996  | 0.0032  | 0.8433   | 1712.6 | 7.5  | 1689   | 16   | 1747.4 | 5.8 | 1747.4 | 5.8  | 3.342108 |
| 13GJR01_104.FIN2 | 621   | 1.98   | 0.0812  | 0.002   | 0.01224 | 0.00019 | 0.1371   | 79.2   | 1.9  | 78.4   | 1.2  | 133    | 50  | 78.4   | 1.2  | 1.010101 |
| 13GJR01_105.FIN2 | 225.9 | 0.856  | 0.837   | 0.0084  | 0.10128 | 0.00086 | 0.27583  | 617.3  | 4.7  | 621.8  | 5.1  | 591    | 16  | 621.8  | 5.1  | 0.728981 |
| 13GJR01_106.FIN2 | 133   | 1.36   | 3.412   | 0.025   | 0.269   | 0.0021  | 0.52543  | 1506.8 | 5.8  | 1535   | 11   | 1466   | 8.7 | 1466   | 8.7  | 4.706685 |
| 13GJR01_107.FIN2 | 252   | 1.447  | 0.1054  | 0.0024  | 0.01572 | 0.00016 | 0.008794 | 101.7  | 2.2  | 100.5  | 1    | 186    | 31  | 100.5  | 1    | 1.179941 |
| 13GJR01_108.FIN2 | 360   | 1.577  | 0.101   | 0.0015  | 0.01498 | 0.00022 | 0.36022  | 97.7   | 1.4  | 95.8   | 1.4  | 131    | 20  | 95.8   | 1.4  | 1.944729 |
| 13GJR01_109.FIN2 | 135.4 | 1.985  | 0.787   | 0.011   | 0.09574 | 0.00071 | 0.061626 | 588.9  | 6    | 589.3  | 4.2  | 580    | 18  | 589.3  | 4.2  | 0.067923 |
| 13GJR01_110.FIN2 | 234   | 1.222  | 5.286   | 0.055   | 0.3384  | 0.0031  | 0.76959  | 1865.8 | 8.8  | 1878   | 15   | 1851.6 | 7.7 | 1851.6 | 7.7  | 1.425794 |
| 13GJR01_111.FIN2 | 222   | 1.422  | 6.78    | 0.15    | 0.3163  | 0.003   | 0.81283  | 2080   | 20   | 1771   | 15   | 2392   | 27  | 2392   | 27   | 25.96154 |
| 13GJR01_112.FIN2 | 107.6 | 0.846  | 1.883   | 0.021   | 0.1831  | 0.0016  | 0.30494  | 1075.4 | 7.3  | 1083.9 | 8.6  | 1058   | 13  | 1083.9 | 8.6  | 0.790404 |
| 13GJR01_113.FIN2 | 47.8  | 1.004  | 4.161   | 0.051   | 0.2945  | 0.0034  | 0.65042  | 1665   | 10   | 1664   | 17   | 1668   | 12  | 1668   | 12   | 0.239808 |
| 13GJR01_114.FIN2 | 256.4 | 2.808  | 4.655   | 0.072   | 0.311   | 0.0053  | 0.76426  | 1761   | 13   | 1745   | 26   | 1772.9 | 9.2 | 1772.9 | 9.2  | 1.573693 |
| 13GJR01_115.FIN2 | 29.95 | 0.3191 | 13.5    | 0.18    | 0.5262  | 0.0067  | 0.63529  | 2715   | 12   | 2725   | 28   | 2703   | 13  | 2703   | 13   | 0.81391  |
| 13GJR01_116.FIN2 | 586   | 1.304  | 0.1035  | 0.0015  | 0.01563 | 0.00018 | 0.44679  | 100    | 1.4  | 100    | 1.2  | 126    | 17  | 100    | 1.2  | 0        |
| 13GJR01_117.FIN2 | 1270  | 5.71   | 0.1418  | 0.0048  | 0.02054 | 0.00069 | 0.94889  | 134.5  | 4.3  | 131.1  | 4.4  | 193    | 16  | 131.1  | 4.4  | 2.527881 |
| 13GJR01_118.FIN2 | 38.2  | 0.932  | 10.5    | 0.12    | 0.4594  | 0.0061  | 0.75818  | 2479   | 11   | 2436   | 27   | 2507   | 10  | 2507   | 10   | 2.83207  |
| 13GJR01_119.FIN2 | 171   | 0.913  | 6.794   | 0.069   | 0.3816  | 0.0037  | 0.57924  | 2084.2 | 8.9  | 2083   | 17   | 2078.5 | 8.6 | 2078.5 | 8.6  | 0.216502 |
| 13GJR01_120.FIN2 | 131   | 1.552  | 0.1262  | 0.0033  | 0.0189  | 0.00032 | 0.16699  | 120.6  | 3    | 120.9  | 2    | 193    | 32  | 120.9  | 2    | 0.248756 |

|                  |       |        |        |        |         |         |         |        |     |        |     |        |     |        |      |          |
|------------------|-------|--------|--------|--------|---------|---------|---------|--------|-----|--------|-----|--------|-----|--------|------|----------|
| GJCOCE01_1.FIN2  | 57.2  | 1.116  | 2.145  | 0.03   | 0.199   | 0.0022  | 0.88036 | 1163.9 | 9.6 | 1170   | 12  | 1155   | 14  | 1170   | 12   | 0.5241   |
| GJCOCE01_2.FIN2  | 17.96 | 0.776  | 2.009  | 0.081  | 0.1778  | 0.003   | 0.94793 | 1112   | 26  | 1055   | 16  | 1226   | 58  | 1055   | 16   | 5.125899 |
| GJCOCE01_3.FIN2  | 250   | 8.3    | 0.639  | 0.016  | 0.0759  | 0.002   | 0.93699 | 501    | 10  | 471    | 12  | 610    | 25  | 471    | 12   | 5.988024 |
| GJCOCE01_5.FIN2  | 153.5 | 1.206  | 0.1217 | 0.0036 | 0.01859 | 0.00032 | 0.87551 | 117    | 3.2 | 118.8  | 2   | 178    | 30  | 118.8  | 2    | 1.538462 |
| GJCOCE01_6.FIN2  | 199.6 | 2.356  | 5.099  | 0.033  | 0.3348  | 0.0022  | 0.78947 | 1835.6 | 5.5 | 1862   | 11  | 1802.5 | 5.6 | 1802.5 | 5.6  | 3.300971 |
| GJCOCE01_7.FIN2  | 96.5  | 0.651  | 0.0833 | 0.0041 | 0.01225 | 0.00021 | 0.9518  | 81.1   | 3.8 | 78.5   | 1.3 | 304    | 63  | 78.5   | 1.3  | 3.205919 |
| GJCOCE01_8.FIN2  | 76.9  | 1.55   | 4.07   | 0.27   | 0.1914  | 0.0088  | 0.99756 | 1639   | 59  | 1128   | 48  | 2376   | 51  | DISC   | DISC | 31.17755 |
| GJCOCE01_8.FIN2  | 21.14 | 0.542  | 11.85  | 0.29   | 0.472   | 0.011   | 0.9841  | 2594   | 22  | 2499   | 45  | 2658   | 15  | 2658   | 15   | 5.981941 |
| GJCOCE01_9.FIN2  | 221.7 | 1.672  | 2.681  | 0.024  | 0.2252  | 0.0017  | 0.5452  | 1324.2 | 6.4 | 1309.1 | 8.7 | 1341   | 10  | 1341   | 10   | 2.378822 |
| GJCOCE01_10.FIN2 | 145.4 | 1.202  | 12.776 | 0.086  | 0.5063  | 0.0039  | 0.91509 | 2663   | 6.3 | 2640   | 17  | 2677   | 8.1 | 2677   | 8.1  | 1.382144 |
| GJCOCE01_11.FIN2 | 206.1 | 0.7202 | 14.016 | 0.093  | 0.5319  | 0.004   | 0.68152 | 2750.6 | 6.3 | 2753   | 18  | 2738.7 | 7.7 | 2738.7 | 7.7  | 0.522146 |
| GJCOCE01_12.FIN2 | 52.8  | 1.14   | 0.598  | 0.012  | 0.0763  | 0.0011  | 0.88217 | 476.2  | 7.8 | 473.7  | 6.7 | 489    | 27  | 473.7  | 6.7  | 0.52499  |
| GJCOCE01_13.FIN2 | 82.19 | 0.863  | 6.586  | 0.048  | 0.3824  | 0.0032  | 0.88669 | 2057.1 | 6.4 | 2089   | 15  | 2015.2 | 8.5 | 2015.2 | 8.5  | 3.662168 |
| GJCOCE01_14.FIN2 | 107.8 | 1.077  | 5.102  | 0.039  | 0.3351  | 0.0024  | 0.87493 | 1836.1 | 6.4 | 1863   | 11  | 1800.1 | 8.3 | 1800.1 | 8.3  | 3.49425  |
| GJCOCE01_15.FIN2 | 358   | 0.903  | 0.118  | 0.0042 | 0.01535 | 0.0002  | 0.85691 | 113.2  | 3.8 | 98.2   | 1.3 | 535    | 77  | 98.2   | 1.3  | 13.25088 |
| GJCOCE01_16.FIN2 | 277   | 1.47   | 0.0873 | 0.0029 | 0.01214 | 0.00019 | 0.90663 | 84.9   | 2.7 | 77.8   | 1.2 | 319    | 49  | 77.8   | 1.2  | 8.36278  |
| GJCOCE01_17.FIN2 | 1163  | 3.121  | 3.248  | 0.025  | 0.2291  | 0.002   | 0.99935 | 1468.5 | 6.1 | 1330   | 10  | 1675.7 | 6.9 | 1675.7 | 6.9  | 2.603018 |
| GJCOCE01_18.FIN2 | 610   | 3.8    | 0.0703 | 0.002  | 0.01021 | 0.00014 | 0.83576 | 69     | 1.9 | 65.5   | 1.8 | 161    | 43  | 65.5   | 1.8  | 5.072464 |
| GJCOCE01_19.FIN2 | 86    | 1.084  | 0.0896 | 0.0053 | 0.01324 | 0.00054 | 0.97324 | 87     | 4.9 | 84.8   | 3.5 | 347    | 82  | 84.8   | 3.5  | 2.528736 |
| GJCOCE01_20.FIN2 | 249   | 1.196  | 0.1166 | 0.0034 | 0.01558 | 0.00019 | 0.8629  | 111.9  | 3.1 | 99.7   | 1.2 | 401    | 48  | 99.7   | 1.2  | 10.90259 |
| GJCOCE01_21.FIN2 | 53.9  | 0.9113 | 0.906  | 0.016  | 0.1066  | 0.001   | 0.80728 | 656.8  | 8.5 | 653    | 6   | 662    | 24  | 653    | 6    | 0.578563 |
| GJCOCE01_22.FIN2 | 161   | 0.764  | 0.7624 | 0.0097 | 0.0879  | 0.0014  | 0.9109  | 575.1  | 5.6 | 543.1  | 8.5 | 687    | 29  | 543.1  | 8.5  | 5.56425  |
| GJCOCE01_23.FIN2 | 1147  | 2.086  | 0.1033 | 0.0013 | 0.0154  | 0.00016 | 0.72279 | 99.8   | 1.2 | 98.5   | 1   | 128    | 16  | 98.5   | 1    | 1.302605 |
| GJCOCE01_24.FIN2 | 76.6  | 0.976  | 4.213  | 0.039  | 0.2998  | 0.0027  | 0.91384 | 1676   | 7.6 | 1690   | 13  | 1647   | 10  | 1647   | 10   | 2.610808 |
| GJCOCE01_25.FIN2 | 170.4 | 1.703  | 2.211  | 0.019  | 0.2011  | 0.0013  | 0.67045 | 1184.2 | 5.8 | 1181.2 | 7.2 | 1184.6 | 9   | 1181.2 | 7.2  | 0.253336 |
| GJCOCE01_26.FIN2 | 59.4  | 1.002  | 0.0781 | 0.0048 | 0.01217 | 0.0003  | 0.97561 | 76.1   | 4.5 | 78     | 1.9 | 306    | 60  | 78     | 1.9  | 2.496715 |
| GJCOCE01_27.FIN2 | 485   | 1.378  | 3.24   | 0.026  | 0.2553  | 0.0026  | 0.83316 | 1466.6 | 6.2 | 1465   | 13  | 1467.5 | 7   | 1467.5 | 7    | 0.170358 |
| GJCOCE01_28.FIN2 | 463   | 1.015  | 0.1318 | 0.0066 | 0.01568 | 0.00019 | 0.92097 | 124.3  | 5.4 | 100.3  | 1.2 | 597    | 79  | 100.3  | 1.2  | 19.30813 |
| GJCOCE01_29.FIN2 | 34.97 | 0.997  | 2.013  | 0.06   | 0.1877  | 0.0045  | 0.97898 | 1119   | 20  | 1109   | 24  | 1156   | 39  | 1109   | 24   | 0.893655 |
| GJCOCE01_30.FIN2 | 12.52 | 1.503  | 13.96  | 0.26   | 0.5286  | 0.0072  | 0.97354 | 2746   | 18  | 2739   | 31  | 2767   | 18  | 2767   | 18   | 1.011926 |
| GJCOCE01_31.FIN2 | 98.5  | 1.527  | 4.966  | 0.031  | 0.3292  | 0.0023  | 0.80598 | 1813.3 | 5.2 | 1834   | 11  | 1783.3 | 6.7 | 1783.3 | 6.7  | 2.843044 |
| GJCOCE01_32.FIN2 | 384   | 0.847  | 3.763  | 0.042  | 0.2664  | 0.0031  | 0.9512  | 1584.5 | 9   | 1522   | 16  | 1684   | 14  | 1684   | 14   | 9.619952 |
| GJCOCE01_33.FIN2 | 71.9  | 1.94   | 3.832  | 0.046  | 0.2723  | 0.0034  | 0.95882 | 1598.9 | 9.8 | 1552   | 17  | 1651   | 14  | 1651   | 14   | 5.996366 |
| GJCOCE01_34.FIN2 | 179.8 | 0.986  | 0.1112 | 0.0034 | 0.01582 | 0.00024 | 0.89483 | 107    | 3.1 | 101.2  | 1.5 | 289    | 36  | 101.2  | 1.5  | 5.420561 |
| GJCOCE01_35.FIN2 | 125.9 | 1.19   | 6.07   | 0.052  | 0.3588  | 0.003   | 0.9022  | 1986.5 | 7.8 | 1976   | 14  | 1994.3 | 7.8 | 1994.3 | 7.8  | 0.917615 |
| GJCOCE01_36.FIN2 | 113.3 | 0.828  | 3.961  | 0.031  | 0.2824  | 0.0025  | 0.87003 | 1626.6 | 6.5 | 1603   | 13  | 1653   | 11  | 1653   | 11   | 3.024803 |
| GJCOCE01_37.FIN2 | 148.6 | 1.337  | 5.564  | 0.049  | 0.3471  | 0.0033  | 0.89195 | 1910.1 | 7.6 | 1920   | 16  | 1904.8 | 7.7 | 1904.8 | 7.7  | 0.797984 |
| GJCOCE01_38.FIN2 | 595   | 0.75   | 0.1031 | 0.0024 | 0.01484 | 0.00018 | 0.74087 | 99.6   | 2.2 | 95     | 1.2 | 208    | 27  | 95     | 1.2  | 4.618474 |
| GJCOCE01_39.FIN2 | 394   | 3.79   | 0.1001 | 0.0029 | 0.01499 | 0.00026 | 0.85522 | 96.8   | 2.7 | 95.9   | 1.6 | 177    | 25  | 95.9   | 1.6  | 0.929752 |
| GJCOCE01_40.FIN2 | 215   | 1.518  | 0.1151 | 0.004  | 0.01635 | 0.00032 | 0.90343 | 110.5  | 3.6 | 104.6  | 2   | 315    | 59  | 104.6  | 2    | 5.339367 |
| GJCOCE01_41.FIN2 | 56.1  | 1.346  | 3.531  | 0.038  | 0.2749  | 0.0027  | 0.91045 | 1535.8 | 8.6 | 1567   | 13  | 1498   | 13  | 1498   | 13   | 4.606142 |
| GJCOCE01_42.FIN2 | 75.4  | 0.9733 | 5.474  | 0.037  | 0.3548  | 0.0028  | 0.9288  | 1896.1 | 5.8 | 1957   | 13  | 1835.5 | 8.3 | 1835.5 | 8.3  | 6.61945  |
| GJCOCE01_43.FIN2 | 109.8 | 0.895  | 0.7288 | 0.0085 | 0.08976 | 0.00095 | 0.58613 | 555.6  | 5   | 554.1  | 5.6 | 587    | 22  | 554.1  | 5.6  | 0.269978 |
| GJCOCE01_44.FIN2 | 354   | 1.569  | 9.06   | 0.27   | 0.371   | 0.01    | 0.98045 | 2341   | 29  | 2032   | 50  | 2630.5 | 6.5 | 2630.5 | 6.5  | 22.75233 |
| GJCOCE01_44.FIN2 | 114.2 | 1.226  | 13.1   | 0.15   | 0.5294  | 0.0059  | 0.94914 | 2686   | 11  | 2738   | 25  | 2658.5 | 5.8 | 2658.5 | 5.8  | 2.990408 |
| GJCOCE01_45.FIN2 | 191   | 1.613  | 0.0823 | 0.0025 | 0.01242 | 0.0002  | 0.8954  | 80.3   | 2.3 | 79.6   | 1.3 | 190    | 30  | 79.6   | 1.3  | 0.871731 |
| GJCOCE01_46.FIN2 | 96.7  | 1.53   | 2.395  | 0.032  | 0.2192  | 0.003   | 0.9496  | 1240.4 | 9.6 | 1277   | 16  | 1169   | 13  | 1169   | 16   | 2.950661 |
| GJCOCE01_47.FIN2 | 86.1  | 0.292  | 0.5698 | 0.0084 | 0.07463 | 0.00078 | 0.83948 | 458.4  | 5.3 | 464    | 4.7 | 415    | 26  | 464    | 4.7  | 1.22164  |
| GJCOCE01_48.FIN2 | 628   | 0.719  | 0.1138 | 0.0028 | 0.01576 | 0.00017 | 0.85773 | 109.4  | 2.5 | 100.8  | 1.1 | 311    | 41  | 100.8  | 1.1  | 7.86106  |
| GJCOCE01_49.FIN2 | 144.7 | 1.311  | 4.363  | 0.043  | 0.2862  | 0.003   | 0.94696 | 1705.1 | 8.2 | 1622   | 15  | 1802   | 12  | 1802   | 12   | 9.988901 |
| GJCOCE01_49.FIN2 | 539   | 0.969  | 0.1164 | 0.0092 | 0.01549 | 0.0002  | 0.70058 | 109.1  | 6.8 | 99.1   | 1.2 | 267    | 87  | 99.1   | 1.2  | 9.165903 |
| GJCOCE01_51.FIN2 | 223.6 | 2.68   | 4.933  | 0.04   | 0.3278  | 0.0032  | 0.88521 | 1809.7 | 7.2 | 1828   | 6.4 | 1783.5 | 6.4 | 1783.5 | 6.4  | 2.495094 |
| GJCOCE01_52.FIN2 | 105.7 | 0.9969 | 4.726  | 0.053  | 0.32    | 0.0037  | 0.88351 | 1771   | 9.5 | 1789   | 18  | 1757.5 | 8.3 | 1757.5 | 8.3  | 1.792319 |
| GJCOCE01_53.FIN2 | 141.6 | 1.191  | 0.0781 | 0.0024 | 0.01202 | 0.00019 | 0.87154 | 76.3   | 2.3 | 77     | 1.2 | 204    | 34  | 77     | 1.2  | 0.917431 |
| GJCOCE01_54.FIN2 | 184.4 | 0.954  | 0.1015 | 0.0033 | 0.01504 | 0.00021 | 0.90396 | 98.1   | 3.1 | 96.2   | 1.3 | 229    | 39  | 96.2   | 1.3  | 1.936799 |
| GJCOCE01_55.FIN2 | 149.9 | 1.611  | 0.5939 | 0.0072 | 0.0741  | 0.00072 | 0.65199 | 473.2  | 4.6 | 460.8  | 4.3 | 537    | 15  | 460.8  | 4.3  | 2.620456 |
| GJCOCE01_56.FIN2 | 39.79 | 0.6033 | 6.612  | 0.069  | 0.3763  | 0.0043  | 0.93086 | 2061.2 | 9.1 | 2058   | 20  | 2077.4 | 9.9 | 2077.4 | 9.9  | 0.93386  |
| GJCOCE01_57.FIN2 | 28    | 0.363  | 1.629  | 0.029  | 0.1597  | 0.0021  | 0.8753  | 98.1   | 11  | 95.5   | 12  | 1050   | 22  | 95.5   | 12   | 2.650357 |
| GJCOCE01_58.FIN2 | 239   | 2.146  | 0.0823 | 0.0018 | 0.01264 | 0.00018 | 0.8403  | 80.2   | 1.7 | 81     | 1.2 | 174    | 34  | 81     | 1.2  | 0.997506 |
| GJCOCE01_59.FIN2 | 68.9  | 1.217  | 2.952  | 0.037  | 0.2454  | 0.0018  | 0.72787 | 1394.4 | 9.5 | 1414.6 | 9.1 | 1336   | 16  | 1376   | 16   | 2.805233 |
| GJCOCE01_60.FIN2 | 165.4 | 1.131  | 0.0953 | 0.003  | 0.01393 | 0.00025 | 0.92056 | 92.4   | 2.7 | 89.2   | 1.6 | 275    | 44  | 89.2   | 1.6  | 3.463203 |
| GJCOCE01_61.FIN2 | 85.9  | 1.007  | 1.917  | 0.023  | 0.1869  | 0.0018  | 0.78645 | 1086.6 | 8   | 1104.5 | 9.7 | 1068   | 13  | 1104.5 | 9.7  | 1.64734  |
| GJCOCE01_62.FIN2 | 112.7 | 1.349  | 2.069  | 0.018  | 0.199   | 0.0014  | 0.79823 | 1138.4 | 6.1 | 1170   | 7.8 | 1089   | 10  | 1170   | 7.8  | 2.75858  |

|                   |       |        |        |        |         |         |         |        |     |        |     |        |     |        |      |          |
|-------------------|-------|--------|--------|--------|---------|---------|---------|--------|-----|--------|-----|--------|-----|--------|------|----------|
| GJCOCE01_63.FIN2  | 108.4 | 1.351  | 1.836  | 0.024  | 0.1785  | 0.0017  | 0.86839 | 1057.9 | 8.5 | 1058.4 | 9.5 | 1079   | 11  | 1058.4 | 9.5  | 0.047263 |
| GJCOCE01_64.FIN2  | 118   | 1.757  | 0.0959 | 0.0034 | 0.01469 | 0.00031 | 0.9482  | 92.9   | 3.1 | 94     | 2   | 188    | 29  | 94     | 2    | 1.184069 |
| GJCOCE01_65.FIN2  | 208.5 | 1.7    | 4.47   | 0.026  | 0.3081  | 0.0022  | 0.70135 | 1725.2 | 4.7 | 1731   | 11  | 1718   | 8.2 | 1718   | 8.2  | 0.756694 |
| GJCOCE01_66.FIN2  | 211   | 1.957  | 1.574  | 0.011  | 0.1622  | 0.0013  | 0.68855 | 959.8  | 4.5 | 968.8  | 7.3 | 938.1  | 8.2 | 968.8  | 7.3  | 0.937695 |
| GJCOCE01_67.FIN2  | 42.1  | 0.657  | 5.18   | 0.27   | 0.3212  | 0.0039  | 0.91903 | 1828   | 39  | 1795   | 19  | 1860   | 64  | 1860   | 64   | 3.494624 |
| GJCOCE01_68.FIN2  | 65.2  | 1.02   | 0.0921 | 0.0062 | 0.01236 | 0.00031 | 0.98216 | 89.2   | 5.8 | 79.2   | 2   | 480    | 100 | 79.2   | 2    | 11.21076 |
| GJCOCE01_69.FIN2  | 293.1 | 1.613  | 14.49  | 0.18   | 0.5221  | 0.0047  | 0.96288 | 2783   | 12  | 2707   | 20  | 2846   | 11  | 2846   | 11   | 4.884048 |
| GJCOCE01_70.FIN2  | 56.55 | 0.86   | 0.625  | 0.012  | 0.07852 | 0.00091 | 0.79223 | 492.6  | 7.6 | 487.3  | 5.4 | 509    | 25  | 487.3  | 5.4  | 1.075924 |
| GJCOCE01_71.FIN2  | 1150  | 2.33   | 0.1041 | 0.0024 | 0.01558 | 0.00032 | 0.94599 | 100.5  | 2.2 | 99.6   | 2   | 147    | 25  | 99.6   | 2    | 0.895522 |
| GJCOCE01_72.FIN2  | 198.9 | 1.416  | 0.093  | 0.0024 | 0.01219 | 0.00019 | 0.92559 | 90.2   | 2.2 | 78.1   | 1.2 | 446    | 46  | 78.1   | 1.2  | 13.41463 |
| GJCOCE01_73.FIN2  | 314   | 0.979  | 0.1067 | 0.0021 | 0.01624 | 0.0002  | 0.85553 | 102.9  | 1.9 | 103.9  | 1.3 | 146    | 21  | 103.9  | 1.3  | 0.971817 |
| GJCOCE01_74.FIN2  | 234   | 0.987  | 4.625  | 0.035  | 0.3177  | 0.0024  | 0.91948 | 1754.6 | 6.8 | 1778   | 12  | 1726.1 | 7.6 | 1726.1 | 7.6  | 3.006778 |
| GJCOCE01_75.FIN2  | 51.2  | 1.12   | 11.299 | 0.091  | 0.4953  | 0.0043  | 0.9515  | 2547.6 | 7.5 | 2595   | 19  | 2513.1 | 7.6 | 2513.1 | 7.6  | 3.258923 |
| GJCOCE01_76.FIN2  | 153.6 | 2.28   | 0.978  | 0.022  | 0.1124  | 0.0014  | 0.90746 | 692    | 11  | 686.4  | 7.9 | 729    | 29  | 686.4  | 7.9  | 0.809249 |
| GJCOCE01_77.FIN2  | 362   | 2.078  | 5.121  | 0.055  | 0.3126  | 0.0038  | 0.96242 | 1839.3 | 9.2 | 1753   | 19  | 1934   | 12  | 1934   | 12   | 9.358842 |
| GJCOCE01_77.FIN2  | 190.9 | 1.928  | 5.785  | 0.078  | 0.3477  | 0.0048  | 0.88891 | 1946   | 12  | 1923   | 23  | 1964   | 12  | 1964   | 12   | 2.087576 |
| GJCOCE01_78.FIN2  | 103.6 | 1.012  | 2.293  | 0.019  | 0.2062  | 0.0017  | 0.86582 | 1209.7 | 6   | 1208.3 | 9.3 | 1223   | 14  | 1223   | 14   | 1.201962 |
| GJCOCE01_79.FIN2  | 41.9  | 0.953  | 2.748  | 0.041  | 0.2352  | 0.0025  | 0.89393 | 1340   | 11  | 1361   | 13  | 1311   | 16  | 1311   | 16   | 3.813883 |
| GJCOCE01_80.FIN2  | 23.9  | 1.018  | 1.833  | 0.039  | 0.1782  | 0.0036  | 0.95703 | 1057   | 14  | 1056   | 20  | 1071   | 23  | 1056   | 20   | 0.094607 |
| GJCOCE01_81.FIN2  | 200.4 | 1.336  | 0.0785 | 0.0024 | 0.01205 | 0.00022 | 0.90494 | 76.7   | 2.3 | 77.2   | 1.4 | 204    | 31  | 77.2   | 1.4  | 0.65189  |
| GJCOCE01_82.FIN2  | 168.3 | 0.895  | 0.0987 | 0.0051 | 0.01309 | 0.00021 | 0.94997 | 95.4   | 4.7 | 83.8   | 1.4 | 421    | 74  | 83.8   | 1.4  | 12.15933 |
| GJCOCE01_83.FIN2  | 190   | 1.266  | 4.13   | 0.034  | 0.295   | 0.0024  | 0.87442 | 1659.7 | 6.7 | 1666   | 12  | 1661.2 | 8.7 | 1661.2 | 8.7  | 0.288948 |
| GJCOCE01_84.FIN2  | 196   | 1.482  | 0.0828 | 0.0021 | 0.0124  | 0.00019 | 0.84872 | 80.7   | 2   | 79.4   | 1.2 | 186    | 32  | 79.4   | 1.2  | 1.610905 |
| GJCOCE01_85.FIN2  | 22.94 | 1.006  | 0.772  | 0.026  | 0.0718  | 0.0019  | 0.9923  | 579    | 15  | 447    | 11  | 1213   | 46  | 447    | 11   | 22.79793 |
| GJCOCE01_86.FIN2  | 76.1  | 1.482  | 4.174  | 0.088  | 0.2982  | 0.006   | 0.95223 | 1667   | 17  | 1681   | 30  | 1652   | 10  | 1652   | 10   | 1.755448 |
| GJCOCE01_87.FIN2  | 178   | 2.06   | 3.023  | 0.024  | 0.2501  | 0.0017  | 0.83357 | 1413   | 6   | 1438.8 | 8.6 | 1380.7 | 8.3 | 1380.7 | 8.3  | 4.20801  |
| GJCOCE01_88.FIN2  | 234.4 | 1.64   | 4.73   | 0.039  | 0.2974  | 0.0023  | 0.95721 | 1772.9 | 7.1 | 1678   | 11  | 1891.2 | 6.7 | 1891.2 | 6.7  | 11.27327 |
| GJCOCE01_89.FIN2  | 164   | 0.854  | 4.822  | 0.031  | 0.3204  | 0.0023  | 0.73869 | 1788.5 | 5.4 | 1793   | 11  | 1785.3 | 7.5 | 1785.3 | 7.5  | 0.4313   |
| GJCOCE01_90.FIN2  | 96.2  | 2.82   | 1.902  | 0.022  | 0.1852  | 0.0019  | 0.80609 | 1081.3 | 7.8 | 1095   | 10  | 1063   | 15  | 1095   | 10   | 1.266993 |
| GJCOCE01_91.FIN2  | 273   | 2.47   | 5.199  | 0.05   | 0.3448  | 0.003   | 0.9303  | 1851.8 | 8.3 | 1909   | 14  | 1792.4 | 8.7 | 1792.4 | 8.7  | 6.505244 |
| GJCOCE01_92.FIN2  | 240.3 | 0.8331 | 0.1048 | 0.005  | 0.01241 | 0.00016 | 0.94715 | 101    | 4.6 | 79.5   | 1   | 658    | 91  | 79.5   | 1    | 21.28713 |
| GJCOCE01_93.FIN2  | 84.5  | 1.086  | 3.78   | 0.1    | 0.2747  | 0.0035  | 0.92997 | 1585   | 21  | 1564   | 18  | 1645   | 32  | 1645   | 32   | 4.924012 |
| GJCOCE01_94.FIN2  | 197   | 1.213  | 0.1011 | 0.0028 | 0.01464 | 0.00026 | 0.92804 | 98.1   | 2.7 | 93.7   | 1.7 | 243    | 31  | 93.7   | 1.7  | 4.485219 |
| GJCOCE01_95.FIN2  | 28.25 | 0.3138 | 11.1   | 0.21   | 0.4342  | 0.0086  | 0.99084 | 2533   | 18  | 2330   | 37  | 2691   | 14  | 2691   | 14   | 13.41509 |
| GJCOCE01_96.FIN2  | 153.1 | 1.211  | 0.0808 | 0.0031 | 0.0124  | 0.00021 | 0.9191  | 79.2   | 2.8 | 79.5   | 1.3 | 192    | 41  | 79.5   | 1.3  | 0.378788 |
| GJCOCE01_97.FIN2  | 282.2 | 1.085  | 0.1011 | 0.0026 | 0.01532 | 0.00018 | 0.79513 | 97.8   | 2.4 | 98     | 1.2 | 181    | 34  | 98     | 1.2  | 0.204499 |
| GJCOCE01_98.FIN2  | 73.2  | 4.94   | 1.935  | 0.037  | 0.1914  | 0.0031  | 0.93944 | 1092   | 13  | 1128   | 17  | 1023   | 14  | 1128   | 17   | 3.296703 |
| GJCOCE01_99.FIN2  | 45.3  | 1.006  | 4.131  | 0.041  | 0.2973  | 0.0025  | 0.9053  | 1659.9 | 8.2 | 1678   | 13  | 1639   | 12  | 1639   | 12   | 2.3795   |
| GJCOCE01_100.FIN2 | 327   | 1.195  | 3.078  | 0.023  | 0.2552  | 0.0018  | 0.80366 | 1427.6 | 5.9 | 1465.3 | 9.5 | 1374.1 | 6.9 | 1374.1 | 6.9  | 6.637072 |
| GJCOCE01_101.FIN2 | 178.9 | 1.191  | 0.165  | 0.017  | 0.0166  | 0.0012  | 0.99977 | 154    | 14  | 106    | 7.4 | 903    | 52  | DISC   | DISC | 31.16883 |
| GJCOCE01_102.FIN2 | 130.2 | 2.16   | 3.275  | 0.028  | 0.2618  | 0.0021  | 0.82685 | 1474.6 | 6.8 | 1499   | 11  | 1446.4 | 8.2 | 1446.4 | 8.2  | 3.636615 |
| GJCOCE01_103.FIN2 | 88.1  | 1.61   | 3.137  | 0.026  | 0.2546  | 0.0021  | 0.77814 | 1441.4 | 6.4 | 1462   | 11  | 1415   | 10  | 1415   | 10   | 3.321555 |
| GJCOCE01_104.FIN2 | 137.4 | 1.598  | 1.879  | 0.017  | 0.1838  | 0.0016  | 0.74336 | 1073.3 | 6   | 1087.6 | 8.6 | 1047   | 11  | 1087.6 | 8.6  | 1.33234  |
| GJCOCE01_105.FIN2 | 140.2 | 1.0065 | 4.559  | 0.03   | 0.318   | 0.0023  | 0.85558 | 1741.6 | 5.4 | 1780   | 11  | 1697.6 | 7.5 | 1697.6 | 7.5  | 4.853911 |
| GJCOCE01_106.FIN2 | 243   | 1.65   | 3.397  | 0.07   | 0.2465  | 0.0048  | 0.97686 | 1503   | 16  | 1420   | 25  | 1621   | 10  | 1621   | 10   | 12.39975 |
| GJCOCE01_106.FIN2 | 56.1  | 0.63   | 3.923  | 0.098  | 0.2811  | 0.0065  | 0.9585  | 1617   | 20  | 1596   | 33  | 1642   | 13  | 1642   | 13   | 2.801462 |
| GJCOCE01_107.FIN2 | 150   | 2.5    | 4.744  | 0.033  | 0.328   | 0.0022  | 0.8877  | 1774.7 | 5.9 | 1829   | 11  | 1710   | 10  | 1710   | 10   | 6.959064 |
| GJCOCE01_108.FIN2 | 64.9  | 0.602  | 0.1314 | 0.0096 | 0.01559 | 0.00038 | 0.96885 | 123    | 7.7 | 99.7   | 2.4 | 700    | 110 | 99.7   | 2.4  | 18.94309 |
| GJCOCE01_109.FIN2 | 183   | 1.62   | 6.11   | 0.064  | 0.3628  | 0.0046  | 0.90998 | 1991.3 | 9.2 | 1995   | 22  | 1973.4 | 7.1 | 1973.4 | 7.1  | 1.094558 |
| GJCOCE01_110.FIN2 | 102   | 0.562  | 0.5182 | 0.0096 | 0.06866 | 0.00072 | 0.77209 | 423.6  | 6.5 | 428    | 4.4 | 407    | 23  | 428    | 4.4  | 1.038716 |
| GJCOCE01_111.FIN2 | 297.5 | 1.324  | 1.66   | 0.016  | 0.1633  | 0.0016  | 0.88117 | 994.1  | 5.9 | 974.7  | 9.1 | 1027   | 17  | 974.7  | 9.1  | 1.951514 |
| GJCOCE01_112.FIN2 | 22.58 | 0.688  | 15.2   | 0.15   | 0.5506  | 0.0063  | 0.96683 | 2827.1 | 9.5 | 2826   | 26  | 2827   | 13  | 2827   | 13   | 0.035373 |
| GJCOCE01_113.FIN2 | 24.51 | 0.321  | 1.559  | 0.03   | 0.1596  | 0.002   | 0.888   | 953    | 12  | 954    | 11  | 933    | 24  | 954    | 11   | 0.104932 |
| GJCOCE01_114.FIN2 | 228   | 2.086  | 1.841  | 0.015  | 0.18    | 0.0014  | 0.71888 | 1060   | 5.5 | 1067   | 7.6 | 1039   | 12  | 1067   | 7.6  | 0.660377 |
| GJCOCE01_115.FIN2 | 20.8  | 1.131  | 1.944  | 0.046  | 0.189   | 0.0024  | 0.9242  | 1094   | 16  | 1118   | 14  | 1071   | 25  | 1118   | 14   | 2.193784 |
| GJCOCE01_116.FIN2 | 1.868 | -18    | 5.89   | 0.31   | 0.401   | 0.014   | 0.97814 | 1944   | 45  | 2169   | 66  | 1762   | 55  | 1762   | 55   | 23.09875 |
| GJCOCE01_117.FIN2 | 246.4 | 0.791  | 2.413  | 0.042  | 0.2078  | 0.0033  | 0.95941 | 1245   | 13  | 1217   | 18  | 1282.5 | 8.5 | 1282.5 | 8.5  | 5.107212 |
| GJCOCE01_118.FIN2 | 426   | 5.71   | 2.205  | 0.059  | 0.2053  | 0.0042  | 0.88437 | 1185   | 18  | 1203   | 22  | 1163   | 18  | 1163   | 22   | 1.518987 |
| GJCOCE01_118.FIN2 | 133   | 1.036  | 3.056  | 0.037  | 0.2496  | 0.0021  | 0.67185 | 1421.4 | 9.2 | 1436   | 11  | 1401   | 12  | 1401   | 12   | 2.498216 |
| GJCOCE01_119.FIN2 | 100.6 | 1.257  | 0.091  | 0.011  | 0.01296 | 0.00084 | 0.99503 | 88     | 11  | 83     | 5.4 | 370    | 150 | 83     | 5.4  | 5.681818 |
| GJCOCE01_119.FIN2 | 313.3 | 0.6805 | 10.1   | 0.1    | 0.4223  | 0.0035  | 0.98833 | 2444.5 | 9   | 2271   | 16  | 2584.6 | 6.3 | 2584.6 | 6.3  | 12.13341 |
| GJCOCE01_120.FIN2 | 137.3 | 0.809  | 0.0835 | 0.0032 | 0.01246 | 0.00027 | 0.92389 | 81.9   | 3.1 | 79.8   | 1.7 | 211    | 44  | 79.8   | 1.7  | 2.564103 |

|                  |       |       |        |        |         |         |         |        |     |        |     |        |     |        |      |          |
|------------------|-------|-------|--------|--------|---------|---------|---------|--------|-----|--------|-----|--------|-----|--------|------|----------|
| 13GJCO01_1.FIN2  | 52    | 0.894 | 15.159 | 0.098  | 0.5782  | 0.0041  | 0.97648 | 2825   | 6.1 | 2941   | 17  | 2749.2 | 7.2 | 2749.2 | 7.2  | 6.976575 |
| 13GJCO01_2.FIN2  | 148.2 | 1.668 | 2.126  | 0.015  | 0.1974  | 0.0016  | 0.73856 | 1157.6 | 4.8 | 1161.1 | 8.4 | 1146.1 | 7   | 1161.1 | 8.4  | 0.30235  |
| 13GJCO01_3.FIN2  | 353   | 3.09  | 0.1027 | 0.0017 | 0.01553 | 0.0002  | 0.7707  | 99.3   | 1.6 | 99.3   | 1.2 | 134    | 17  | 99.3   | 1.2  | 0        |
| 13GJCO01_4.FIN2  | 303   | 0.853 | 3.42   | 0.025  | 0.2633  | 0.0018  | 0.7327  | 1509.4 | 5.7 | 1506.6 | 9.2 | 1508.6 | 6.3 | 1508.6 | 6.3  | 0.132573 |
| 13GJCO01_5.FIN2  | 139   | 1.44  | 0.0963 | 0.0058 | 0.0133  | 0.0004  | 0.99044 | 93.2   | 5.3 | 85.1   | 2.6 | 350    | 63  | 85.1   | 2.6  | 8.690987 |
| 13GJCO01_5.FIN2  | 108   | 1.059 | 1.1    | 0.049  | 0.0821  | 0.0031  | 0.99971 | 752    | 23  | 508    | 19  | 1555   | 34  | DISC   | DISC | 32.44681 |
| 13GJCO01_6.FIN2  | 19.22 | 0.7   | 4.351  | 0.055  | 0.3083  | 0.0033  | 0.92677 | 1703   | 10  | 1732   | 16  | 1660   | 18  | 1660   | 18   | 4.337349 |
| 13GJCO01_7.FIN2  | 1410  | 6.9   | 1.308  | 0.037  | 0.1278  | 0.004   | 0.99014 | 846    | 16  | 775    | 23  | 1050.4 | 8.4 | 775    | 23   | 8.392435 |
| 13GJCO01_8.FIN2  | 250.3 | 1.278 | 0.106  | 0.0018 | 0.01514 | 0.00018 | 0.72716 | 102.3  | 1.7 | 96.8   | 1.1 | 243    | 29  | 96.8   | 1.1  | 5.376344 |
| 13GJCO01_9.FIN2  | 80.3  | 0.753 | 11.574 | 0.093  | 0.4892  | 0.0039  | 0.90574 | 2570   | 7.5 | 2567   | 17  | 2569.2 | 7   | 2569.2 | 7    | 0.08563  |
| 13GJCO01_10.FIN2 | 105.7 | 0.725 | 2.219  | 0.038  | 0.2047  | 0.0018  | 0.74887 | 1186   | 11  | 1200.1 | 9.6 | 1159   | 24  | 1159   | 9.6  | 1.18887  |
| 13GJCO01_11.FIN2 | 62.8  | 0.712 | 0.0817 | 0.0034 | 0.01252 | 0.00024 | 0.96024 | 180.1  | 3.1 | 80.2   | 1.6 | 325    | 63  | 80.2   | 1.6  | 0.124844 |
| 13GJCO01_12.FIN2 | 110.9 | 1.602 | 3.249  | 0.023  | 0.2586  | 0.002   | 0.82732 | 1468.6 | 5.6 | 1482   | 10  | 1444.8 | 8   | 1444.8 | 8    | 2.574751 |
| 13GJCO01_13.FIN2 | 464   | 2.028 | 0.3286 | 0.0032 | 0.04596 | 0.00035 | 0.54579 | 288.5  | 2.4 | 289.6  | 2.1 | 277    | 14  | 289.6  | 2.1  | 0.381282 |
| 13GJCO01_14.FIN2 | 115.9 | 2.24  | 0.0828 | 0.003  | 0.01251 | 0.00025 | 0.99878 | 80.7   | 2.8 | 80.1   | 1.6 | 242    | 50  | 80.1   | 1.6  | 0.743494 |
| 13GJCO01_15.FIN2 | 122.4 | 1.341 | 3.493  | 0.029  | 0.2651  | 0.0018  | 0.79544 | 1525.3 | 6.6 | 1515.7 | 9.3 | 1541   | 9.6 | 1541   | 9.6  | 1.641791 |
| 13GJCO01_16.FIN2 | 7.98  | 0.711 | 4.02   | 0.1    | 0.2793  | 0.0054  | 0.96142 | 1636   | 20  | 1591   | 27  | 1686   | 31  | 1686   | 31   | 5.634638 |
| 13GJCO01_17.FIN2 | 474   | 1.066 | 0.122  | 0.0085 | 0.01559 | 0.00022 | 0.84074 | 116.4  | 7.5 | 99.9   | 1.4 | 490    | 130 | 99.9   | 1.4  | 14.17526 |
| 13GJCO01_18.FIN2 | 86.1  | 1.091 | 2.366  | 0.032  | 0.2128  | 0.002   | 0.75704 | 1232   | 9.7 | 1244   | 10  | 1212   | 18  | 1212   | 18   | 2.640264 |
| 13GJCO01_19.FIN2 | 85.5  | 2.076 | 1.783  | 0.019  | 0.1753  | 0.0015  | 0.73968 | 1038.9 | 7.1 | 1041.1 | 8   | 1039   | 14  | 1041.1 | 8    | 0.211762 |
| 13GJCO01_20.FIN2 | 165   | 0.966 | 0.6587 | 0.0092 | 0.08301 | 0.00079 | 0.80978 | 513.5  | 5.6 | 514    | 4.7 | 516    | 14  | 514    | 4.7  | 0.097371 |
| 13GJCO01_21.FIN2 | 222.7 | 2.75  | 3.431  | 0.046  | 0.2558  | 0.0026  | 0.87363 | 1511   | 11  | 1468   | 13  | 1571   | 10  | 1571   | 10   | 6.556334 |
| 13GJCO01_22.FIN2 | 183   | 1.272 | 4.323  | 0.077  | 0.3071  | 0.0052  | 0.9484  | 1697   | 15  | 1726   | 25  | 1662   | 12  | 1662   | 12   | 3.850782 |
| 13GJCO01_23.FIN2 | 56.4  | 0.616 | 1.82   | 0.023  | 0.1798  | 0.0017  | 0.82172 | 1052.2 | 8.4 | 1065.5 | 9.4 | 1030   | 14  | 1065.5 | 9.4  | 1.264018 |
| 13GJCO01_23.FIN2 | 347.7 | 1.5   | 0.117  | 0.015  | 0.167   | 0.0014  | 0.99866 | 111    | 13  | 106.4  | 8.9 | 332    | 92  | 106.4  | 8.9  | 4.144144 |
| 13GJCO01_24.FIN2 | 300   | 1.949 | 4.307  | 0.045  | 0.3043  | 0.0038  | 0.78431 | 1696.4 | 8   | 1712   | 19  | 1681   | 12  | 1681   | 12   | 1.84414  |
| 13GJCO01_25.FIN2 | 115   | 1.19  | 9.71   | 0.16   | 0.382   | 0.0059  | 0.99823 | 2406   | 16  | 2085   | 28  | 2703.2 | 7.5 | 2703.2 | 7.5  | 22.86919 |
| 13GJCO01_25.FIN2 | 104.6 | 0.982 | 16.96  | 0.27   | 0.4817  | 0.0068  | 0.9957  | 2932   | 16  | 2534   | 29  | 3212   | 12  | 3212   | 12   | 21.10834 |
| 13GJCO01_26.FIN2 | 148   | 1.417 | 0.883  | 0.01   | 0.10693 | 0.0009  | 0.73879 | 642.2  | 5.6 | 654.8  | 5.3 | 614    | 13  | 654.8  | 5.3  | 1.962006 |
| 13GJCO01_27.FIN2 | 83    | 0.754 | 4.043  | 0.039  | 0.2893  | 0.0025  | 0.8382  | 1642.3 | 7.8 | 1638   | 13  | 1662.8 | 9.7 | 1662.8 | 9.7  | 1.49146  |
| 13GJCO01_28.FIN2 | 92.8  | 1.049 | 14.02  | 0.16   | 0.5261  | 0.0057  | 0.94806 | 2754   | 12  | 2724   | 24  | 2775.3 | 5   | 2775.3 | 5    | 1.848449 |
| 13GJCO01_29.FIN2 | 61    | 0.91  | 5.23   | 0.06   | 0.352   | 0.0046  | 0.97306 | 1857   | 9.9 | 1943   | 22  | 1769.4 | 6.5 | 1769.4 | 6.5  | 9.811235 |
| 13GJCO01_30.FIN2 | 213   | 1.489 | 4.27   | 0.035  | 0.3038  | 0.0023  | 0.87475 | 1687.1 | 6.7 | 1710   | 11  | 1663.7 | 5.4 | 1663.7 | 5.4  | 2.782954 |



|                   |       |        |        |        |         |         |         |        |     |        |      |        |          |        |      |          |
|-------------------|-------|--------|--------|--------|---------|---------|---------|--------|-----|--------|------|--------|----------|--------|------|----------|
| 13GJC001_31.FIN2  | 126.9 | 1.91   | 0.0817 | 0.0027 | 0.0125  | 0.00019 | 0.92164 | 79.7   | 2.6 | 80.1   | 1.2  | 201    | 35       | 80.1   | 1.2  | 0.501882 |
| 13GJC001_32.FIN2  | 482   | 4.23   | 2.534  | 0.031  | 0.2134  | 0.0027  | 0.90582 | 1283.3 | 8.6 | 1247   | 14   | 1353.2 | 7.5      | 1353.2 | 7.5  | 7.848064 |
| 13GJC001_33.FIN2  | 11.67 | 0.762  | 7.08   | 0.11   | 0.3967  | 0.0051  | 0.96852 | 2120   | 14  | 2153   | 24   | 2093   | 20       | 2093   | 20   | 2.866699 |
| 13GJC001_34.FIN2  | 268.7 | 2.148  | 4.877  | 0.031  | 0.3271  | 0.0027  | 0.74824 | 1798   | 5.4 | 1824   | 13   | 1772.5 | 5.9      | 1772.5 | 5.9  | 2.905501 |
| 13GJC001_35.FIN2  | 68.6  | 1      | 4.522  | 0.035  | 0.3155  | 0.002   | 0.63281 | 1735.5 | 6.2 | 1767.4 | 9.8  | 1704   | 8.2      | 1704   | 8.2  | 3.720657 |
| 13GJC001_36.FIN2  | 37.6  | 2.531  | 0.1282 | 0.0057 | 0.01899 | 0.00041 | 0.97531 | 122.9  | 5.1 | 121.2  | 2.6  | 322    | 50       | 121.2  | 2.6  | 1.383238 |
| 13GJC001_37.FIN2  | 209   | 1.118  | 0.1049 | 0.0038 | 0.01536 | 0.00018 | 0.87062 | 101.1  | 3.5 | 98.3   | 1.1  | 279    | 56       | 98.3   | 1.1  | 2.769535 |
| 13GJC001_38.FIN2  | 367   | 1.293  | 4.804  | 0.039  | 0.3177  | 0.0028  | 0.89117 | 1785.3 | 6.9 | 1778   | 14   | 1788.2 | 5.5      | 1788.2 | 5.5  | 0.570406 |
| 13GJC001_39.FIN2  | 107   | 1.1363 | 4.069  | 0.032  | 0.3005  | 0.0015  | 0.80488 | 1648.9 | 6.2 | 1693.6 | 7.6  | 1585.3 | 8.2      | 1585.3 | 8.2  | 6.831515 |
| 13GJC001_40.FIN2  | 307   | 2.71   | 5.158  | 0.023  | 0.339   | 0.0019  | 0.82179 | 1845.5 | 3.8 | 1881.8 | 9.3  | 1797.5 | 4.8      | 1797.5 | 4.8  | 4.689847 |
| 13GJC001_41.FIN2  | 36.1  | 1.027  | 1.876  | 0.035  | 0.1824  | 0.0024  | 0.88634 | 1072   | 13  | 1080   | 13   | 1023   | 24       | 1080   | 13   | 0.746269 |
| 13GJC001_42.FIN2  | 54.7  | 0.797  | 0.65   | 0.14   | 0.0168  | 0.0012  | 0.48639 | 468    | 74  | 107.4  | 7.4  | 3100   | 190 DISC | DISC   |      | 77.05128 |
| 13GJC001_43.FIN2  | 98.5  | 2.09   | 4.06   | 0.12   | 0.2938  | 0.0063  | 0.96352 | 1653   | 21  | 1660   | 31   | 1644   | 26       | 1644   | 26   | 0.973236 |
| 13GJC001_44.FIN2  | 265   | 1.75   | 5.08   | 0.039  | 0.3368  | 0.0028  | 0.8231  | 1834.1 | 6.5 | 1871   | 13   | 1787.6 | 5.9      | 1787.6 | 5.9  | 4.665473 |
| 13GJC001_45.FIN2  | 860   | 4.04   | 0.105  | 0.0014 | 0.0158  | 0.00017 | 0.70613 | 101.4  | 1.3 | 101.1  | 1.1  | 128    | 14       | 101.1  | 1.1  | 0.295858 |
| 13GJC001_46.FIN2  | 127   | 0.9378 | 13.77  | 0.14   | 0.5411  | 0.0063  | 0.95339 | 2734   | 10  | 2787   | 26   | 2693.8 | 9.2      | 2693.8 | 9.2  | 3.459797 |
| 13GJC001_47.FIN2  | 66.2  | 1.289  | 2.173  | 0.026  | 0.1993  | 0.002   | 0.9099  | 1171.7 | 8.2 | 1171   | 11   | 1155   | 16       | 1171   | 11   | 0.059742 |
| 13GJC001_48.FIN2  | 30.6  | 1.796  | 4.969  | 0.075  | 0.331   | 0.0052  | 0.95655 | 1813   | 13  | 1843   | 25   | 1786   | 11       | 1786   | 11   | 3.191489 |
| 13GJC001_49.FIN2  | 103.3 | 1.43   | 1.932  | 0.019  | 0.1889  | 0.0014  | 0.60211 | 1091.8 | 6.6 | 1115.1 | 7.5  | 1044   | 11       | 1115.1 | 7.5  | 2.13409  |
| 13GJC001_50.FIN2  | 1160  | 2.07   | 0.1098 | 0.0047 | 0.0162  | 0.00068 | 0.97137 | 105.6  | 4.3 | 103.6  | 4.3  | 186    | 30       | 103.6  | 4.3  | 1.893939 |
| 13GJC001_51.FIN2  | 52.4  | 0.888  | 0.794  | 0.02   | 0.0954  | 0.0013  | 0.99592 | 592    | 11  | 587.2  | 7.6  | 609    | 31       | 587.2  | 7.6  | 0.810811 |
| 13GJC001_52.FIN2  | 128.2 | 0.688  | 2.98   | 0.045  | 0.2431  | 0.0042  | 0.97798 | 1398.8 | 9.8 | 1402   | 22   | 1374   | 11       | 1374   | 11   | 2.037846 |
| 13GJC001_53.FIN2  | 153.9 | 1.651  | 1.875  | 0.021  | 0.1812  | 0.0014  | 0.85668 | 1071.8 | 7.3 | 1073.4 | 7.4  | 1064   | 11       | 1073.4 | 7.4  | 0.149282 |
| 13GJC001_54.FIN2  | 203.4 | 1.02   | 0.0791 | 0.0019 | 0.01216 | 0.00016 | 0.81537 | 77.3   | 1.8 | 77.9   | 1    | 158    | 30       | 77.9   | 1    | 0.776197 |
| 13GJC001_55.FIN2  | 105.5 | 0.462  | 3.359  | 0.031  | 0.2625  | 0.0019  | 0.75426 | 1494.4 | 7.3 | 1504   | 10   | 1486   | 10       | 1486   | 10   | 1.211306 |
| 13GJC001_56.FIN2  | 147.7 | 1.453  | 3.346  | 0.03   | 0.2607  | 0.0022  | 0.69815 | 1491.6 | 6.9 | 1493   | 11   | 1487   | 12       | 1487   | 12   | 0.403497 |
| 13GJC001_57.FIN2  | 55.9  | 0.628  | 3.07   | 0.029  | 0.2513  | 0.002   | 0.72409 | 1424.8 | 7.3 | 1445   | 10   | 1397.7 | 9.2      | 1397.7 | 9.2  | 3.384131 |
| 13GJC001_58.FIN2  | 88    | 1.349  | 3.49   | 0.024  | 0.2711  | 0.0022  | 0.79244 | 1524.6 | 5.5 | 1546   | 11   | 1493.6 | 7.5      | 1493.6 | 7.5  | 3.508302 |
| 13GJC001_59.FIN2  | 51    | 1.94   | 2.017  | 0.029  | 0.1889  | 0.0026  | 0.87905 | 1120.7 | 9.8 | 1115   | 14   | 1138   | 12       | 1115   | 14   | 0.508611 |
| 13GJC001_60.FIN2  | 570   | 2.673  | 3.053  | 0.046  | 0.2048  | 0.0035  | 0.99943 | 1421   | 11  | 1201   | 19   | 1768   | 11 DISC  | DISC   |      | 32.07014 |
| 13GJC001_61.FIN2  | 95.3  | 1.7    | 4.631  | 0.045  | 0.3206  | 0.003   | 0.90013 | 1754.2 | 8.1 | 1794   | 14   | 1700.3 | 6.5      | 1700.3 | 6.5  | 5.510792 |
| 13GJC001_62.FIN2  | 322.3 | 2.183  | 0.104  | 0.0037 | 0.01426 | 0.00015 | 0.8442  | 100.3  | 3.4 | 91.28  | 0.96 | 358    | 54       | 91.28  | 0.96 | 8.993021 |
| 13GJC001_63.FIN2  | 121.9 | 0.697  | 3.823  | 0.031  | 0.2823  | 0.0021  | 0.7617  | 1597.2 | 6.6 | 1603   | 11   | 1580.3 | 6.4      | 1580.3 | 6.4  | 1.436436 |
| 13GJC001_64.FIN2  | 398   | 1.192  | 0.1005 | 0.0021 | 0.01533 | 0.00024 | 0.87519 | 97.2   | 1.9 | 98     | 1.5  | 154    | 23       | 98     | 1.5  | 0.823045 |
| 13GJC001_65.FIN2  | 64.8  | 0.799  | 0.743  | 0.015  | 0.0914  | 0.0013  | 0.87021 | 563.7  | 8.8 | 563.5  | 7.5  | 550    | 21       | 563.5  | 7.5  | 0.03548  |
| 13GJC001_66.FIN2  | 103   | 1.271  | 2.033  | 0.029  | 0.194   | 0.0022  | 0.85971 | 1126   | 9.7 | 1143   | 12   | 1083   | 12       | 1143   | 12   | 1.509769 |
| 13GJC001_67.FIN2  | 115.6 | 1.395  | 2.025  | 0.017  | 0.1959  | 0.0018  | 0.75968 | 1124.2 | 5.6 | 1153.3 | 9.5  | 1069   | 11       | 1153.3 | 9.5  | 2.588507 |
| 13GJC001_68.FIN2  | 95.7  | 1.12   | 4.578  | 0.046  | 0.3135  | 0.0028  | 0.8165  | 1744.6 | 8.4 | 1758   | 14   | 1732   | 11       | 1732   | 11   | 1.501155 |
| 13GJC001_69.FIN2  | 197   | 1.336  | 0.1753 | 0.0035 | 0.02581 | 0.00029 | 0.6983  | 163.9  | 3.1 | 164.3  | 1.8  | 197    | 27       | 164.3  | 1.8  | 0.244051 |
| 13GJC001_70.FIN2  | 35.8  | 1.277  | 16.83  | 0.14   | 0.5946  | 0.0039  | 0.96241 | 2924.4 | 7.9 | 3008   | 16   | 2869.5 | 6.1      | 2869.5 | 6.1  | 4.826625 |
| 13GJC001_71.FIN2  | 344   | 1.094  | 4.256  | 0.038  | 0.2863  | 0.0031  | 0.94949 | 1684.5 | 7.4 | 1623   | 16   | 1762.3 | 7.3      | 1762.3 | 7.3  | 7.904443 |
| 13GJC001_72.FIN2  | 1005  | 3.86   | 2.039  | 0.043  | 0.1658  | 0.0043  | 0.99183 | 1128   | 14  | 989    | 23   | 1404   | 16       | 989    | 23   | 12.3227  |
| 13GJC001_72.FIN2  | 541   | 2.152  | 2.847  | 0.032  | 0.232   | 0.0031  | 0.91307 | 1367.6 | 8.4 | 1345   | 16   | 1394.4 | 8.6      | 1394.4 | 8.6  | 3.542742 |
| 13GJC001_73.FIN2  | 399.1 | 3.22   | 2.982  | 0.026  | 0.2442  | 0.0032  | 0.85932 | 1402.6 | 6.8 | 1408   | 17   | 1398.4 | 9.8      | 1398.4 | 9.8  | 0.686499 |
| 13GJC001_74.FIN2  | 91.1  | 0.4781 | 0.854  | 0.012  | 0.101   | 0.0011  | 0.90884 | 626.6  | 6.6 | 620.3  | 6.5  | 660    | 23       | 620.3  | 6.5  | 1.005426 |
| 13GJC001_75.FIN2  | 91.5  | 0.823  | 3.65   | 0.18   | 0.2657  | 0.0096  | 0.98948 | 1575   | 35  | 1515   | 50   | 1686   | 20       | 1686   | 20   | 10.14235 |
| 13GJC001_76.FIN2  | 23.15 | 0.697  | 3.322  | 0.073  | 0.2514  | 0.003   | 0.92133 | 1483   | 17  | 1445   | 15   | 1537   | 28       | 1537   | 28   | 5.985686 |
| 13GJC001_77.FIN2  | 227.6 | 2.04   | 1.975  | 0.019  | 0.1894  | 0.0016  | 0.80138 | 1106.7 | 6.4 | 1118   | 8.7  | 1090.4 | 8.9      | 1118   | 8.7  | 1.021054 |
| 13GJC001_78.FIN2  | 123.2 | 0.8502 | 0.732  | 0.012  | 0.0912  | 0.0011  | 0.83583 | 557.1  | 6.8 | 562.5  | 6.6  | 533    | 21       | 562.5  | 6.6  | 0.969305 |
| 13GJC001_79.FIN2  | 121.2 | 0.95   | 4.596  | 0.034  | 0.3166  | 0.0024  | 0.78189 | 1748.3 | 6.3 | 1775   | 12   | 1716.8 | 7.1      | 1716.8 | 7.1  | 3.390028 |
| 13GJC001_80.FIN2  | 23.5  | 0.1712 | 1.64   | 0.055  | 0.02894 | 0.00094 | 0.79601 | 978    | 19  | 183.9  | 5.9  | 3964   | 39 DISC  | DISC   |      | 81.19632 |
| 13GJC001_81.FIN2  | 149.3 | 0.884  | 0.5127 | 0.0065 | 0.06777 | 0.00065 | 0.81778 | 420.1  | 4.4 | 422.7  | 4    | 392    | 22       | 422.7  | 4    | 0.6189   |
| 13GJC001_82.FIN2  | 95.6  | 1.709  | 2.189  | 0.025  | 0.1998  | 0.0026  | 0.95833 | 1177.1 | 8.1 | 1174   | 14   | 1188   | 15       | 1174   | 14   | 0.263359 |
| 13GJC001_83.FIN2  | 418   | 19.8   | 4.802  | 0.034  | 0.321   | 0.0027  | 0.83072 | 1785.1 | 5.9 | 1795   | 13   | 1776.6 | 7.5      | 1776.6 | 7.5  | 1.035686 |
| 13GJC001_84.FIN2  | 193   | 2.2    | 4.609  | 0.054  | 0.3175  | 0.0043  | 0.97154 | 1750   | 10  | 1777   | 21   | 1712.5 | 7.1      | 1712.5 | 7.1  | 3.766423 |
| 13GJC001_85.FIN2  | 252   | 1.316  | 0.1002 | 0.0029 | 0.0152  | 0.00021 | 0.8634  | 96.9   | 2.7 | 97.3   | 1.3  | 178    | 37       | 97.3   | 1.3  | 0.412797 |
| 13GJC001_86.FIN2  | 133.8 | 0.726  | 4.255  | 0.03   | 0.3033  | 0.0023  | 0.74808 | 1684.5 | 5.8 | 1707   | 11   | 1652   | 8.6      | 1652   | 8.6  | 3.329298 |
| 13GJC001_87.FIN2  | 26.6  | 1.995  | 5.51   | 0.1    | 0.3368  | 0.0066  | 0.9746  | 1895   | 19  | 1863   | 35   | 1927   | 13       | 1927   | 13   | 3.321225 |
| 13GJC001_88.FIN2  | 238.9 | 4.37   | 3.02   | 0.058  | 0.2059  | 0.0038  | 0.99818 | 1415   | 15  | 1206   | 20   | 1739.6 | 6.8 DISC | DISC   |      | 30.67372 |
| 13GJC001_89.FIN2  | 406   | 5.7    | 4.795  | 0.033  | 0.3221  | 0.0029  | 0.83933 | 1783.7 | 5.7 | 1799   | 14   | 1762.9 | 6.6      | 1762.9 | 6.6  | 2.047762 |
| 13GJC001_90.FIN2  | 123   | 0.591  | 3.931  | 0.058  | 0.2802  | 0.0038  | 0.96046 | 1619   | 12  | 1592   | 19   | 1651.3 | 8.7      | 1651.3 | 8.7  | 3.59111  |
| 13GJC001_91.FIN2  | 360   | 1.77   | 0.101  | 0.0019 | 0.01539 | 0.00022 | 0.74922 | 97.7   | 1.8 | 98.5   | 1.4  | 126    | 22       | 98.5   | 1.4  | 0.188833 |
| 13GJC001_92.FIN2  | 1660  | 2.27   | 0.1121 | 0.0026 | 0.01586 | 0.00026 | 0.89946 | 107.9  | 2.3 | 101.4  | 1.6  | 234    | 23       | 101.4  | 1.6  | 6.024096 |
| 13GJC001_93.FIN2  | 159   | 1.163  | 0.1424 | 0.0074 | 0.01673 | 0.00029 | 0.96726 | 134.7  | 6.6 | 106.9  | 1.8  | 666    | 99       | 106.9  | 1.8  | 2.063846 |
| 13GJC001_95.FIN2  | 89.5  | 2.159  | 0.0771 | 0.0028 | 0.01225 | 0.00023 | 0.94923 | 75.3   | 2.7 | 78.5   | 1.5  | 246    | 53       | 78.5   | 1.5  | 4.249668 |
| 13GJC001_96.FIN2  | 91    | 2.98   | 2.538  | 0.044  | 0.2182  | 0.0026  | 0.79471 | 1282   | 13  | 1272   | 14   | 1283   | 15       | 1283   | 15   | 0.857366 |
| 13GJC001_97.FIN2  | 106   | 1.551  | 0.888  | 0.012  | 0.10631 | 0.00091 | 0.74677 | 645    | 6.4 | 651.2  | 5.3  | 616    | 17       | 651.2  | 5.3  | 0.96124  |
| 13GJC001_98.FIN2  | 90.1  | 0.377  | 0.57   | 0.0086 | 0.07301 | 0.00082 | 0.80789 | 457.7  | 5.5 | 454.2  | 4.9  | 467    | 19       | 454.2  | 4.9  | 0.764693 |
| 13GJC001_99.FIN2  | 107.2 | 0.911  | 4.496  | 0.04   | 0.3155  | 0.0032  | 0.89131 | 1731.7 | 7.4 | 1767   | 16   | 1675.2 | 7.9      | 1675.2 | 7.9  | 5.479943 |
| 13GJC001_100.FIN2 | 179   | 2.16   | 4.64   | 0.053  | 0.3171  | 0.0031  | 0.96909 | 1755.6 | 9.6 | 1775   | 15   |        |          |        |      |          |

other Colorado samples

| Sample Name:     |         | 207/235 |         |          |         | 206/238  |          |        |          | 206/207  |          |          |          | Best age |          |          |                |
|------------------|---------|---------|---------|----------|---------|----------|----------|--------|----------|----------|----------|----------|----------|----------|----------|----------|----------------|
| Grain #          | [U] ppm | U/Th    | 207/235 | 2σ error | 206/238 | 2σ error | RHO      | Age Ma | 2σ error | Age (Ma) | 2σ error | Age (Ma) | 2σ error | Age (Ma) | 2σ error | 2σ error | % Discordance* |
| S3NESLEN_1.FIN2  | 118.8   | 1.34    | 6.925   | 0.051    | 0.396   | 0.0029   | 0.74844  | 2101.5 | 6.5      | 2150     | 14       | 2056.7   | 9.3      | 2056.7   | 9.3      | 4.536393 |                |
| S3NESLEN_2.FIN2  | 87.9    | 1.469   | 2.386   | 0.033    | 0.2213  | 0.0035   | 0.61139  | 1238   | 9.9      | 1289     | 18       | 1162     | 27       | 1162     | 18       | 4.119548 |                |
| S3NESLEN_3.FIN2  | 103.7   | 0.584   | 4.678   | 0.031    | 0.3219  | 0.0018   | 0.48694  | 1765.1 | 5.4      | 1800.3   | 9        | 1721     | 11       | 1721     | 11       | 4.607786 |                |
| S3NESLEN_4.FIN2  | 187.2   | 1.401   | 3.123   | 0.03     | 0.2498  | 0.0031   | 0.70472  | 1438   | 7.5      | 1437     | 16       | 1446     | 17       | 1446     | 17       | 0.622407 |                |
| S3NESLEN_5.FIN2  | 426     | 1.206   | 0.1127  | 0.0032   | 0.01601 | 0.00023  | 0.35356  | 108.4  | 2.9      | 102.4    | 1.5      | 247      | 59       | 102.4    | 1.5      | 5.535055 |                |
| S3NESLEN_6.FIN2  | 128     | 0.8297  | 0.4532  | 0.0075   | 0.05975 | 0.00054  | 0.27069  | 379.3  | 5.2      | 374.1    | 3.3      | 426      | 37       | 374.1    | 3.3      | 1.370946 |                |
| S3NESLEN_7.FIN2  | 313     | 2.051   | 9.55    | 0.19     | 0.3655  | 0.0037   | 0.76746  | 2389   | 18       | 2008     | 18       | 2721     | 18       | 2721     | 18       | 26.2036  |                |
| S3NESLEN_8.FIN2  | 131.5   | 0.732   | 0.1053  | 0.0041   | 0.01539 | 0.00025  | 0.054007 | 101.5  | 3.6      | 98.5     | 1.6      | 151      | 63       | 98.5     | 1.6      | 2.955665 |                |
| S3NESLEN_9.FIN2  | 386     | 0.787   | 0.0979  | 0.002    | 0.01474 | 0.00012  | 0.032339 | 94.8   | 1.9      | 94.32    | 0.77     | 105      | 44       | 94.32    | 0.77     | 0.506329 |                |
| S3NESLEN_11.FIN2 | 2.49    | 0.364   | 9.82    | 0.46     | 0.1222  | 0.0051   | 0.40132  | 2422   | 38       | 746      | 30       | 4478     | 70       | DISC     | DISC     | 69.19901 |                |
| S3NESLEN_12.FIN2 | 92.7    | 1.081   | 4.318   | 0.026    | 0.312   | 0.0022   | 0.49681  | 1697.3 | 4.9      | 1750     | 11       | 1643     | 13       | 1643     | 13       | 6.512477 |                |
| S3NESLEN_13.FIN2 | 177.7   | 2.021   | 4.948   | 0.027    | 0.3315  | 0.0023   | 0.54818  | 1811   | 4.7      | 1846     | 11       | 1780     | 11       | 1780     | 11       | 3.707865 |                |
| S3NESLEN_14.FIN2 | 125     | 1.262   | 1.965   | 0.018    | 0.1921  | 0.0017   | 0.6154   | 1103.4 | 6.2      | 1132.6   | 9.1      | 1062     | 17       | 1132.6   | 9.1      | 2.646366 |                |
| S3NESLEN_15.FIN2 | 126.6   | 0.749   | 0.1122  | 0.0027   | 0.01685 | 0.00023  | 0.18426  | 107.9  | 2.4      | 107.7    | 1.5      | 128      | 58       | 107.7    | 1.5      | 0.185357 |                |
| S3NESLEN_16.FIN2 | 123     | 0.796   | 1.94    | 0.017    | 0.1889  | 0.0017   | 0.55116  | 1096.5 | 5.8      | 1115.4   | 9        | 1059     | 18       | 1115.4   | 9        | 1.723666 |                |
| S3NESLEN_17.FIN2 | 186.5   | 1.246   | 4.489   | 0.035    | 0.3099  | 0.0024   | 0.66211  | 1729.5 | 6.6      | 1742     | 11       | 1722     | 11       | 1722     | 11       | 1.16144  |                |
| S3NESLEN_18.FIN2 | 127     | 0.8601  | 14.78   | 0.078    | 0.5689  | 0.0033   | 0.55722  | 2800.9 | 5        | 2903     | 14       | 2732.6   | 8.9      | 2732.6   | 8.9      | 6.235819 |                |
| S3NESLEN_19.FIN2 | 60      | 0.406   | 5.443   | 0.051    | 0.3486  | 0.0028   | 0.60946  | 1891.1 | 8.1      | 1930     | 14       | 1861     | 12       | 1861     | 12       | 3.707684 |                |
| S3NESLEN_20.FIN2 | 104.2   | 1.209   | 2.104   | 0.019    | 0.1981  | 0.0017   | 0.34485  | 1149.9 | 6.3      | 1164.9   | 9        | 1141     | 19       | 1164.9   | 9        | 1.304461 |                |
| S3NESLEN_21.FIN2 | 122     | 1.378   | 4.147   | 0.048    | 0.2991  | 0.0033   | 0.94059  | 1662.8 | 9.6      | 1686     | 16       | 1636     | 17       | 1636     | 17       | 3.056235 |                |
| S3NESLEN_22.FIN2 | 28.15   | 0.6433  | 3.11    | 0.043    | 0.2529  | 0.0027   | 0.18722  | 1434   | 11       | 1453     | 14       | 1414     | 33       | 1414     | 33       | 2.758133 |                |
| S3NESLEN_23.FIN2 | 52.4    | 0.744   | 0.084   | 0.0052   | 0.01286 | 0.00028  | 0.097085 | 81.7   | 4.8      | 82.4     | 1.8      | 110      | 120      | 82.4     | 1.8      | 0.856793 |                |
| S3NESLEN_24.FIN2 | 24.2    | 0.3178  | 3.084   | 0.048    | 0.04324 | 0.00075  | 0.39556  | 1431   | 12       | 272.8    | 4.7      | 4309     | 28       | DISC     | DISC     | 80.93641 |                |
| S3NESLEN_25.FIN2 | 334     | 1.105   | 3.089   | 0.033    | 0.244   | 0.0021   | 0.60319  | 1429.7 | 8.1      | 1407     | 11       | 1478     | 18       | 1478     | 18       | 4.803789 |                |
| S3NESLEN_26.FIN2 | 141     | 1.345   | 0.1113  | 0.0031   | 0.01682 | 0.00024  | 0.23631  | 107.1  | 2.8      | 107.5    | 1.5      | 117      | 60       | 107.5    | 1.5      | 0.373483 |                |
| S3NESLEN_27.FIN2 | 141.3   | 1.239   | 4.245   | 0.031    | 0.3068  | 0.0026   | 0.52834  | 1682.6 | 6        | 1727     | 13       | 1639     | 15       | 1639     | 15       | 5.369128 |                |
| S3NESLEN_28.FIN2 | 138.1   | 1.024   | 0.4564  | 0.0078   | 0.06107 | 0.00069  | 0.17555  | 381.5  | 5.4      | 382.1    | 4.2      | 380      | 37       | 382.1    | 4.2      | 0.157274 |                |
| S3NESLEN_29.FIN2 | 181.2   | 1.681   | 3.677   | 0.057    | 0.2669  | 0.003    | 0.62978  | 1566   | 12       | 1525     | 16       | 1631     | 23       | 1631     | 23       | 6.49908  |                |
| S3NESLEN_29.FIN2 | 60.5    | 0.713   | 4.152   | 0.071    | 0.3031  | 0.0039   | 0.53424  | 1664   | 14       | 1707     | 19       | 1614     | 30       | 1614     | 30       | 5.762082 |                |
| S3NESLEN_30.FIN2 | 148.1   | 1.499   | 2.986   | 0.023    | 0.2474  | 0.0019   | 0.69612  | 1404.4 | 5.9      | 1425     | 10       | 1380     | 11       | 1380     | 11       | 3.26087  |                |
| S3NESLEN_31.FIN2 | 645     | 8.06    | 2.199   | 0.073    | 0.1663  | 0.0028   | 0.17345  | 1183   | 24       | 992      | 15       | 1558     | 69       | 992      | 15       | 16.14539 |                |
| S3NESLEN_31.FIN2 | 110.2   | 1.72    | 2.001   | 0.034    | 0.1896  | 0.0031   | 0.5475   | 1115   | 11       | 1119     | 17       | 1112     | 33       | 1119     | 17       | 0.358744 |                |
| S3NESLEN_32.FIN2 | 170     | 1.353   | 0.496   | 0.0064   | 0.06574 | 0.00056  | 0.29512  | 408.8  | 4.3      | 410.4    | 3.4      | 391      | 31       | 410.4    | 3.4      | 0.391389 |                |
| S3NESLEN_33.FIN2 | 140.6   | 1.225   | 0.103   | 0.0028   | 0.01567 | 0.00023  | 0.074552 | 99.5   | 2.6      | 100.3    | 1.5      | 115      | 63       | 100.3    | 1.5      | 0.80402  |                |
| S3NESLEN_34.FIN2 | 346     | 1.02    | 0.18    | 0.0032   | 0.02646 | 0.00035  | 0.5483   | 168    | 2.8      | 168.4    | 2.2      | 156      | 32       | 168.4    | 2.2      | 0.238095 |                |
| S3NESLEN_35.FIN2 | 121.5   | 0.968   | 3.363   | 0.028    | 0.2656  | 0.0034   | 0.42837  | 1495.5 | 6.6      | 1518     | 17       | 1469     | 25       | 1469     | 25       | 3.335602 |                |
| S3NESLEN_36.FIN2 | 303.3   | 0.747   | 0.5134  | 0.0063   | 0.06727 | 0.00052  | 0.3828   | 420.6  | 4.2      | 419.7    | 3.1      | 428      | 28       | 419.7    | 3.1      | 0.21398  |                |
| S3NESLEN_37.FIN2 | 929     | 1.456   | 0.09    | 0.0012   | 0.01307 | 0.00012  | 0.3799   | 87.5   | 1.1      | 83.72    | 0.77     | 175      | 28       | 83.72    | 0.77     | 4.32     |                |
| S3NESLEN_38.FIN2 | 541     | 2.192   | 4.388   | 0.047    | 0.3059  | 0.0035   | 0.82608  | 1709.8 | 8.9      | 1720     | 17       | 1701.6   | 9.6      | 1701.6   | 9.6      | 1.081335 |                |
| S3NESLEN_38.FIN2 | 351.3   | 2.23    | 4.759   | 0.033    | 0.3308  | 0.0029   | 0.59002  | 1777.7 | 5.7      | 1842     | 14       | 1712     | 14       | 1712     | 14       | 7.593458 |                |
| S3NESLEN_39.FIN2 | 227.4   | 0.554   | 0.0854  | 0.0022   | 0.01263 | 0.00015  | 0.11484  | 83.1   | 2.1      | 80.9     | 0.94     | 146      | 59       | 80.9     | 0.94     | 2.647413 |                |
| S3NESLEN_40.FIN2 | 270.6   | 1.047   | 6.156   | 0.04     | 0.3624  | 0.0028   | 0.66857  | 1998   | 5.7      | 1993     | 13       | 2005     | 11       | 2005     | 11       | 0.598504 |                |
| S3NESLEN_41.FIN2 | 112.3   | 1.898   | 1.684   | 0.022    | 0.1669  | 0.0019   | 0.33177  | 1002.3 | 8.2      | 995      | 11       | 1015     | 31       | 995      | 11       | 0.728325 |                |
| S3NESLEN_42.FIN2 | 248.8   | 0.7283  | 2.648   | 0.018    | 0.2299  | 0.0017   | 0.673    | 1314   | 5        | 1334     | 8.8      | 1291     | 11       | 1291     | 11       | 3.330751 |                |
| S3NESLEN_43.FIN2 | 75.9    | 1.024   | 1.85    | 0.051    | 0.1748  | 0.0022   | 0.12358  | 1057   | 15       | 1038     | 12       | 1069     | 34       | 1038     | 12       | 1.79754  |                |
| S3NESLEN_44.FIN2 | 318     | 1.258   | 0.378   | 0.027    | 0.01807 | 0.00033  | 0.54407  | 322    | 20       | 115.4    | 2.1      | 2319     | 97       | DISC     | DISC     | 64.16149 |                |
| S3NESLEN_45.FIN2 | 114.7   | 1.903   | 0.1059  | 0.0036   | 0.01629 | 0.00024  | 0.044944 | 102.1  | 3.3      | 104.4    | 1.5      | 59       | 76       | 104.4    | 1.5      | 2.252693 |                |
| S3NESLEN_46.FIN2 | 196.1   | 0.676   | 10.12   | 0.14     | 0.4616  | 0.0061   | 0.90941  | 2445   | 12       | 2446     | 27       | 2446.5   | 9.1      | 2446.5   | 9.1      | 0.020437 |                |
| S3NESLEN_47.FIN2 | 242     | 1.891   | 5.126   | 0.04     | 0.3392  | 0.0028   | 0.90075  | 1841.2 | 7.1      | 1883     | 13       | 1796.9   | 9.7      | 1796.9   | 9.7      | 4.791586 |                |
| S3NESLEN_48.FIN2 | 225     | 3.2     | 4.644   | 0.037    | 0.3222  | 0.0024   | 0.73604  | 1757.7 | 6.5      | 1800     | 11       | 1712     | 9.7      | 1712     | 9.7      | 5.140187 |                |
| S3NESLEN_49.FIN2 | 216     | 2.721   | 0.1022  | 0.0029   | 0.0148  | 0.0002   | 0.2405   | 98.8   | 2.7      | 94.7     | 1.3      | 182      | 61       | 94.7     | 1.3      | 4.149798 |                |
| S3NESLEN_50.FIN2 | 193.9   | 0.8116  | 0.0961  | 0.0026   | 0.01456 | 0.00017  | 0.18705  | 93.2   | 2.4      | 93.2     | 1.1      | 117      | 59       | 93.2     | 1.1      | 0        |                |
| S3NESLEN_51.FIN2 | 214     | 2.12    | 1.82    | 0.021    | 0.1816  | 0.0017   | 0.2802   | 1052.5 | 7.4      | 1075.7   | 9.2      | 1010     | 26       | 1075.7   | 9.2      | 2.204276 |                |
| S3NESLEN_51.FIN2 | 94.3    | 1.233   | 2.075   | 0.028    | 0.1985  | 0.0025   | 0.51849  | 1140.3 | 9.1      | 1167     | 13       | 1096     | 26       | 1167     | 13       | 2.341489 |                |
| S3NESLEN_52.FIN2 | 223.6   | 1.046   | 4.395   | 0.026    | 0.3091  | 0.0021   | 0.63859  | 1711.1 | 4.9      | 1736     | 10       | 1678     | 9.6      | 1678     | 9.6      | 3.456496 |                |
| S3NESLEN_53.FIN2 | 40.61   | 1.08    | 7.278   | 0.071    | 0.4115  | 0.0033   | 0.50865  | 2145.5 | 8.7      | 2222     | 15       | 2074     | 16       | 2074     | 16       | 7.135969 |                |
| S3NESLEN_54.FIN2 | 123.2   | 1.342   | 2.872   | 0.039    | 0.2347  | 0.0024   | 0.66369  | 1374   | 10       | 1359     | 13       | 1375     | 20       | 1375     | 20       | 1.163636 |                |
| S3NESLEN_55.FIN2 | 23.2    | 0.6485  | 5.279   | 0.065    | 0.3335  | 0.0034   | 0.36331  | 1865   | 11       | 1855     | 17       | 1867     | 23       | 1867     | 23       | 0.642742 |                |
| S3NESLEN_56.FIN2 | 169     | 1.263   | 0.209   | 0.025    | 0.01763 | 0.00035  | 0.73075  | 188    | 21       | 112.7    | 2.2      | 1020     | 220      | DISC     | DISC     | 40.05319 |                |
| S3NESLEN_57.FIN2 | 76      | 0.7826  | 5.658   | 0.069    | 0.3546  | 0.0042   | 0.75438  | 1924   | 11       | 1956     | 20       | 1885     | 14       | 1885     | 14       | 3.766578 |                |
| S3NESLEN_58.FIN2 | 285     | 1.04    | 2.639   | 0.028    | 0.2293  | 0.0021   | 0.86986  | 1311.1 | 8.1      | 1331     | 11       | 1263     | 14       | 1263     | 14       | 5.384006 |                |
| S3NESLEN_59.FIN2 | 192     | 1.347   | 4.751   | 0.045    | 0.3242  | 0.0023   | 0.74356  | 1775.6 | 8        | 1810     | 11       | 1726     | 11       | 1726     | 11       | 4.866744 |                |
| S3NESLEN_60.FIN2 | 115.5   | 1.163   | 2.37    | 0.017    | 0.2156  | 0.0016   | 0.47596  | 1233.5 | 5.1      | 1258.5   | 8.5      | 1166     | 16       | 1166     | 8.5      | 2.026753 |                |
| S3NESLEN_61.FIN2 | 141     | 1.22    | 3.104   | 0.027    | 0.255   | 0.0018   | 0.64041  | 1433.4 | 6.5      | 1463.9   | 9.5      | 1381     | 13       | 1381     | 13       | 6.002896 |                |
| S3NESLEN_62.FIN2 | 143     | 1.314   | 4.845   | 0.039    | 0.3306  | 0.0024   | 0.34042  | 1792.3 | 6.7      | 1841     | 11       | 1726     | 13       | 1726     | 13       | 6.662804 |                |
| S3NESLEN_63.FIN2 | 52.6    | 0.798   | 0.0876  | 0.0048   | 0.01237 | 0.00031  | 0.022858 | 85.1   | 4.5      | 79.2     | 1.9      | 230      | 120      | 79.2     | 1.9      | 6.93302  |                |
| S3NESLEN_64.FIN2 | 48.9    | 1.574   | 16.01   | 0.11     | 0.5852  | 0.0047   | 0.55124  | 2877.2 | 6.4      | 2969     | 19       | 2815     | 12       | 2815     | 12       | 5.470693 |                |
| S3NESLEN_65.FIN2 | 46.61   | 0.866   | 4.192   | 0.09     | 0.2589  | 0.0037   | 0.44179  | 1671   | 17       | 1487     | 18       | 1916     | 34       | 1916     | 34       | 22.3904  |                |
| S3NESLEN_66.FIN2 | 65.9    | 1.77    | 2.137   | 0.026    | 0.2026  | 0.0018   | 0.57856  | 1161.4 | 8.5      | 1189.1   | 9.9      | 1109     | 24       | 1189.1   | 9.9      | 2.385053 |                |
| S3NESLEN_67.FIN2 | 318.6   | 42.5    | 1.721   | 0.015    | 0.1     |          |          |        |          |          |          |          |          |          |          |          |                |

|                   |       |        |        |        |         |         |          |        |     |        |     |        |     |        |      |          |
|-------------------|-------|--------|--------|--------|---------|---------|----------|--------|-----|--------|-----|--------|-----|--------|------|----------|
| S3NESLEN_83.FIN2  | 104.9 | 7.041  | 5.439  | 0.033  | 0.3486  | 0.0026  | 0.45858  | 1890.8 | 5.3 | 1928   | 12  | 1849   | 14  | 1849   | 14   | 4.27258  |
| S3NESLEN_84.FIN2  | 139   | 1.922  | 4.732  | 0.029  | 0.3278  | 0.0021  | 0.63446  | 1773.3 | 5.2 | 1827   | 10  | 1703   | 10  | 1703   | 10   | 7.281268 |
| S3NESLEN_85.FIN2  | 102.1 | 0.655  | 3.914  | 0.033  | 0.2833  | 0.0034  | 0.69707  | 1616.1 | 6.9 | 1609   | 17  | 1638   | 14  | 1638   | 14   | 1.770452 |
| S3NESLEN_86.FIN2  | 182.7 | 1.171  | 1.971  | 0.014  | 0.1908  | 0.0013  | 0.49246  | 1106   | 5   | 1125.5 | 7   | 1066   | 14  | 1125.5 | 7    | 1.76311  |
| S3NESLEN_87.FIN2  | 120.8 | 1.094  | 4.092  | 0.047  | 0.2865  | 0.0037  | 0.76637  | 1651.9 | 9.3 | 1623   | 19  | 1696   | 15  | 1696   | 15   | 4.304245 |
| S3NESLEN_88.FIN2  | 643   | 2.29   | 0.102  | 0.0022 | 0.01527 | 0.00019 | 0.20433  | 98.6   | 2   | 97.7   | 1.2 | 127    | 41  | 97.7   | 1.2  | 0.912779 |
| S3NESLEN_89.FIN2  | 95    | 1.739  | 2.004  | 0.021  | 0.1926  | 0.0018  | 0.49098  | 1116.3 | 7   | 1135.3 | 9.9 | 1070   | 18  | 1135.3 | 9.9  | 1.702051 |
| S3NESLEN_90.FIN2  | 41.3  | 1.214  | 3.058  | 0.044  | 0.2436  | 0.0029  | 0.097007 | 1422   | 11  | 1405   | 15  | 1443   | 35  | 1443   | 35   | 2.633403 |
| S3NESLEN_91.FIN2  | 57.5  | 6.39   | 14.08  | 0.13   | 0.5463  | 0.005   | 0.68792  | 2754.7 | 8.8 | 2809   | 21  | 2709   | 13  | 2709   | 13   | 3.691399 |
| S3NESLEN_92.FIN2  | 370.6 | 1.65   | 2.099  | 0.056  | 0.1651  | 0.0035  | 0.89948  | 1148   | 18  | 985    | 19  | 1446   | 23  | 985    | 19   | 14.19861 |
| S3NESLEN_92.FIN2  | 141.3 | 4.08   | 3.25   | 0.1    | 0.2541  | 0.0028  | 0.70135  | 1469   | 22  | 1459   | 15  | 1486   | 39  | 1486   | 39   | 1.816958 |
| S3NESLEN_93.FIN2  | 74.7  | 1.436  | 1.972  | 0.026  | 0.1931  | 0.0017  | 0.50649  | 1107.5 | 8.8 | 1137.8 | 9.2 | 1042   | 22  | 1137.8 | 9.2  | 2.735892 |
| S3NESLEN_94.FIN2  | 128.1 | 2.27   | 0.4825 | 0.0065 | 0.06486 | 0.00056 | 0.27033  | 400.3  | 4.6 | 405.1  | 3.4 | 370    | 32  | 405.1  | 3.4  | 1.199101 |
| S3NESLEN_95.FIN2  | 372   | 1.087  | 0.1003 | 0.0022 | 0.01545 | 0.0002  | 0.14419  | 97     | 2   | 98.9   | 1.3 | 65     | 46  | 98.9   | 1.3  | 1.958763 |
| S3NESLEN_96.FIN2  | 144.7 | 2.344  | 2.245  | 0.016  | 0.2079  | 0.0012  | 0.3694   | 1195.7 | 4.9 | 1217.8 | 6.6 | 1159   | 13  | 1159   | 6.6  | 1.84829  |
| S3NESLEN_97.FIN2  | 137.7 | 1.552  | 3.651  | 0.042  | 0.2541  | 0.003   | 0.47799  | 1560.4 | 9.1 | 1459   | 15  | 1694   | 20  | 1694   | 20   | 13.87249 |
| S3NESLEN_98.FIN2  | 447   | 1.177  | 0.101  | 0.002  | 0.01525 | 0.00017 | 0.21838  | 97.7   | 1.8 | 97.6   | 1.1 | 107    | 44  | 97.6   | 1.1  | 0.102354 |
| S3NESLEN_99.FIN2  | 406   | 3.7    | 9.42   | 0.23   | 0.4232  | 0.0082  | 0.86357  | 2377   | 22  | 2274   | 37  | 2458   | 21  | 2458   | 21   | 7.485761 |
| S3NESLEN_100.FIN2 | 110.2 | 1.008  | 4.397  | 0.042  | 0.3033  | 0.0032  | 0.74631  | 1712.1 | 7.8 | 1707   | 16  | 1716   | 12  | 1716   | 12   | 0.524476 |
| S3NESLEN_101.FIN2 | 303   | 0.921  | 0.1038 | 0.0023 | 0.01567 | 0.00018 | 0.065491 | 100.2  | 2.2 | 100.2  | 1.1 | 106    | 53  | 100.2  | 1.1  | 0        |
| S3NESLEN_102.FIN2 | 65.1  | 0.6805 | 0.589  | 0.01   | 0.07593 | 0.00075 | 0.11842  | 470.1  | 6.4 | 471.7  | 4.5 | 474    | 45  | 471.7  | 4.5  | 0.340353 |
| S3NESLEN_103.FIN2 | 281.2 | 1.599  | 5.436  | 0.049  | 0.3408  | 0.0036  | 0.66054  | 1892   | 8.3 | 1891   | 18  | 1882   | 17  | 1882   | 17   | 1.88215  |
| S3NESLEN_104.FIN2 | 106.8 | 7.05   | 4.137  | 0.034  | 0.3     | 0.0024  | 0.53833  | 1661.4 | 6.7 | 1691   | 12  | 1623   | 15  | 1623   | 15   | 4.189772 |
| S3NESLEN_105.FIN2 | 70.2  | 1.098  | 1.214  | 0.015  | 0.1376  | 0.0021  | 0.28863  | 806.6  | 7.1 | 831    | 12  | 752    | 33  | 831    | 12   | 3.025043 |
| S3NESLEN_106.FIN2 | 52.3  | 2.081  | 1.873  | 0.039  | 0.1843  | 0.0021  | 0.37382  | 1070   | 13  | 1090   | 11  | 1024   | 33  | 1090   | 11   | 1.869159 |
| S3NESLEN_107.FIN2 | 166.8 | 0.912  | 0.4089 | 0.0062 | 0.05629 | 0.00064 | 0.51328  | 348.5  | 4.4 | 353    | 3.9 | 317    | 33  | 353    | 3.9  | 1.291248 |
| S3NESLEN_108.FIN2 | 50.7  | 1.079  | 2.108  | 0.031  | 0.1949  | 0.0018  | 0.42976  | 1152   | 9.7 | 1147.8 | 9.9 | 1156   | 27  | 1147.8 | 9.9  | 0.364583 |
| S3NESLEN_109.FIN2 | 238   | 0.908  | 4.469  | 0.044  | 0.3084  | 0.0029  | 0.74396  | 1725   | 8.2 | 1733   | 14  | 1730   | 14  | 1730   | 14   | 0.17341  |
| S3NESLEN_109.FIN2 | 88.6  | 1.196  | 4.721  | 0.041  | 0.3277  | 0.003   | 0.26834  | 1770.7 | 7.3 | 1827   | 14  | 1705   | 22  | 1705   | 22   | 7.155425 |
| S3NESLEN_110.FIN2 | 4.92  | 0.145  | 5.83   | 0.29   | 0.1393  | 0.0045  | 0.47147  | 1951   | 42  | 840    | 25  | 3466   | 78  | DISC   | DISC | 56.94516 |
| S3NESLEN_111.FIN2 | 476   | 1.759  | 4.769  | 0.034  | 0.3276  | 0.0025  | 0.76084  | 1779.1 | 6   | 1827   | 12  | 1723.5 | 9.3 | 1723.5 | 9.3  | 6.005222 |
| S3NESLEN_112.FIN2 | 111.4 | 1.563  | 4.834  | 0.033  | 0.3297  | 0.0023  | 0.38951  | 1790.6 | 5.8 | 1837   | 11  | 1740   | 11  | 1740   | 11   | 5.574713 |
| S3NESLEN_113.FIN2 | 178   | 1.306  | 1.975  | 0.014  | 0.1902  | 0.0012  | 0.46122  | 1107   | 4.8 | 1122.6 | 6.4 | 1091   | 14  | 1122.6 | 6.4  | 1.409214 |
| S3NESLEN_114.FIN2 | 434   | 0.636  | 0.422  | 0.021  | 0.0485  | 0.00053 | 0.68544  | 356    | 15  | 305.3  | 3.3 | 674    | 87  | 305.3  | 3.3  | 14.24157 |
| S3NESLEN_115.FIN2 | 144   | 1.359  | 0.1083 | 0.0033 | 0.01672 | 0.00026 | 0.014094 | 104.3  | 3   | 106.9  | 1.6 | 93     | 71  | 106.9  | 1.6  | 2.492809 |
| S3NESLEN_116.FIN2 | 19.3  | 1.548  | 16.93  | 0.21   | 0.5919  | 0.0084  | 0.77303  | 2930   | 12  | 2996   | 34  | 2902   | 14  | 2902   | 14   | 3.239145 |
| S3NESLEN_117.FIN2 | 280   | 1.029  | 0.1123 | 0.0059 | 0.01519 | 0.0002  | 0.011149 | 107.8  | 5.3 | 97.2   | 1.2 | 293    | 93  | 97.2   | 1.2  | 9.833024 |
| S3NESLEN_118.FIN2 | 279.6 | 1.047  | 2.936  | 0.022  | 0.243   | 0.0017  | 0.51913  | 1390.9 | 5.6 | 1402   | 9.1 | 1378   | 14  | 1378   | 14   | 1.741655 |
| S3NESLEN_119.FIN2 | 127.1 | 0.38   | 0.823  | 0.012  | 0.1007  | 0.0011  | 0.094949 | 609.1  | 6.8 | 618.7  | 6.6 | 586    | 39  | 618.7  | 6.6  | 1.576096 |
| S3NESLEN_120.FIN2 | 89.5  | 1.461  | 4.335  | 0.048  | 0.2934  | 0.0023  | 0.35793  | 1700.4 | 9   | 1658   | 12  | 1754   | 20  | 1754   | 20   | 5.473204 |

|                |       |        |        |        |         |         |          |        |     |        |     |        |     |        |     |          |
|----------------|-------|--------|--------|--------|---------|---------|----------|--------|-----|--------|-----|--------|-----|--------|-----|----------|
| S2SEGO_1.FIN2  | 198   | 0.897  | 0.1065 | 0.0024 | 0.01631 | 0.00021 | 0.15485  | 102.7  | 2.2 | 104.3  | 1.4 | 79     | 51  | 104.3  | 1.4 | 1.557936 |
| S2SEGO_2.FIN2  | 135.5 | 1.725  | 1.816  | 0.055  | 0.1772  | 0.004   | 0.091067 | 1051   | 20  | 1052   | 22  | 1057   | 78  | 1052   | 22  | 0.095147 |
| S2SEGO_2.FIN2  | 147.9 | 0.946  | 3.202  | 0.026  | 0.2587  | 0.0021  | 0.39768  | 1458.5 | 6.4 | 1483   | 11  | 1429   | 16  | 1429   | 16  | 3.778866 |
| S2SEGO_3.FIN2  | 34.8  | 0.83   | 1.853  | 0.027  | 0.1796  | 0.0017  | 0.12747  | 1063.6 | 9.7 | 1064.5 | 9.3 | 1054   | 34  | 1064.5 | 9.3 | 0.084618 |
| S2SEGO_4.FIN2  | 56.1  | 2.333  | 5.149  | 0.055  | 0.3336  | 0.0029  | 0.42257  | 1844.8 | 9.3 | 1856   | 14  | 1824   | 18  | 1824   | 18  | 1.754386 |
| S2SEGO_5.FIN2  | 139.6 | 1.153  | 4.573  | 0.031  | 0.3132  | 0.0023  | 0.52941  | 1744.9 | 5.8 | 1756   | 11  | 1736   | 12  | 1736   | 12  | 1.152074 |
| S2SEGO_6.FIN2  | 107.2 | 0.635  | 4.907  | 0.046  | 0.3295  | 0.0032  | 0.66046  | 1804.1 | 8.1 | 1836   | 16  | 1782   | 14  | 1782   | 14  | 3.030303 |
| S2SEGO_7.FIN2  | 89.7  | 1.408  | 0.3148 | 0.0061 | 0.04407 | 0.00055 | 0.14191  | 278.4  | 4.8 | 278    | 3.4 | 273    | 51  | 278    | 3.4 | 0.143678 |
| S2SEGO_8.FIN2  | 100.3 | 1.0893 | 3.468  | 0.029  | 0.2743  | 0.002   | 0.4683   | 1519.6 | 6.6 | 1564   | 11  | 1467   | 16  | 1467   | 16  | 6.612134 |
| S2SEGO_9.FIN2  | 76.6  | 0.5321 | 0.0839 | 0.0029 | 0.01276 | 0.00028 | 0.12934  | 81.7   | 2.7 | 81.7   | 1.8 | 84     | 77  | 81.7   | 1.8 | 0        |
| S2SEGO_10.FIN2 | 118.7 | 0.973  | 7.343  | 0.047  | 0.4048  | 0.0027  | 0.70107  | 2154.6 | 5.9 | 2191   | 12  | 2126   | 10  | 2126   | 10  | 3.057385 |
| S2SEGO_11.FIN2 | 290   | 1.31   | 0.1515 | 0.0025 | 0.02202 | 0.00019 | 0.11693  | 143.2  | 2.2 | 140.4  | 1.2 | 162    | 36  | 140.4  | 1.2 | 1.955307 |
| S2SEGO_12.FIN2 | 104.5 | 1.175  | 16.97  | 0.1    | 0.5884  | 0.0047  | 0.63923  | 2932.7 | 5.8 | 2982   | 19  | 2896.9 | 8.5 | 2896.9 | 8.5 | 2.937623 |
| S2SEGO_13.FIN2 | 69.3  | 0.7304 | 13.5   | 0.1    | 0.5305  | 0.0043  | 0.69383  | 2714.8 | 7.1 | 2743   | 18  | 2699   | 10  | 2699   | 10  | 1.630233 |
| S2SEGO_15.FIN2 | 163   | 0.703  | 0.62   | 0.027  | 0.07615 | 0.00091 | 0.68248  | 484    | 13  | 473.1  | 5.5 | 519    | 56  | 473.1  | 5.5 | 2.252066 |
| S2SEGO_16.FIN2 | 25.6  | 2.835  | 2.313  | 0.036  | 0.2116  | 0.0028  | 0.2959   | 1215   | 11  | 1239   | 14  | 1182   | 33  | 1182   | 14  | 1.975309 |
| S2SEGO_17.FIN2 | 114.8 | 1.476  | 9.661  | 0.082  | 0.4485  | 0.0035  | 0.59666  | 2402.5 | 7.8 | 2388   | 16  | 2421   | 12  | 2421   | 12  | 1.363073 |
| S2SEGO_18.FIN2 | 76.9  | 0.703  | 0.739  | 0.011  | 0.09084 | 0.00097 | 0.24346  | 561.3  | 6.3 | 560.4  | 5.7 | 596    | 37  | 560.4  | 5.7 | 0.160342 |
| S2SEGO_19.FIN2 | 63.5  | 1.686  | 2.022  | 0.022  | 0.1918  | 0.0018  | 0.1728   | 1122.5 | 7.5 | 1131   | 9.7 | 1111   | 27  | 1131   | 9.7 | 0.757238 |
| S2SEGO_20.FIN2 | 239   | 1.54   | 0.567  | 0.0057 | 0.07439 | 0.00063 | 0.19908  | 456    | 3.7 | 462.5  | 3.8 | 437    | 26  | 462.5  | 3.8 | 1.425439 |
| S2SEGO_21.FIN2 | 180   | 1.575  | 0.5138 | 0.0062 | 0.06762 | 0.0006  | 0.34476  | 420.8  | 4.1 | 421.8  | 3.6 | 432    | 27  | 421.8  | 3.6 | 0.237643 |
| S2SEGO_22.FIN2 | 130.8 | 2.164  | 1.832  | 0.017  | 0.1776  | 0.0013  | 0.42464  | 1056.8 | 6.1 | 1054   | 7.2 | 1073   | 19  | 1054   | 7.2 | 0.264951 |
| S2SEGO_23.FIN2 | 789   | 12.2   | 3.38   | 0.059  | 0.2531  | 0.0043  | 0.70375  | 1499   | 14  | 1454   | 22  | 1574   | 21  | 1574   | 21  | 7.623888 |
| S2SEGO_23.FIN2 | 347   | 3.34   | 3.953  | 0.034  | 0.2967  | 0.003   | 0.6498   | 1624.4 | 7   | 1675   | 15  | 1569   | 16  | 1569   | 16  | 6.755895 |
| S2SEGO_24.FIN2 | 142.7 | 1.571  | 0.5643 | 0.0085 | 0.07368 | 0.00069 | 0.20632  | 454.1  | 5.5 | 458.2  | 4.2 | 424    | 36  | 458.2  | 4.2 | 0.902885 |
| S2SEGO_25.FIN2 | 224   | 2.63   | 4.253  | 0.026  | 0.3048  | 0.0019  | 0.71842  | 1684.1 | 5.1 | 1714.8 | 9.5 | 1655   | 11  | 1655   | 11  | 3.613293 |
| S2SEGO_26.FIN2 | 38.7  | 0.4865 | 13.59  | 0.11   | 0.5232  | 0.0049  | 0.59752  | 2721.3 | 7.8 | 2712   | 21  | 2726   | 12  | 2726   | 12  | 0.513573 |
| S2SEGO_27.FIN2 | 313   | 1.0471 | 5.782  | 0.03   | 0.3646  | 0.0021  | 0.56285  | 1944.1 | 4.5 | 2004   | 10  | 1887.7 | 9.2 | 1887.7 | 9.2 | 6.160937 |
| S2SEGO_28.FIN2 | 89.1  | 2.049  | 2.465  | 0.021  | 0.2203  | 0.0018  | 0.55264  | 1261.3 | 6.2 | 1283.2 | 9.6 | 1231   | 14  | 1231   | 14  | 4.240455 |
| S2SEGO_29.FIN2 | 96.6  | 0.962  | 1.879  | 0.024  | 0.1721  | 0.0019  | 0.47012  | 1074.2 | 8.2 | 1024   | 11  | 1189   | 27  | 1024   | 11  | 4.673245 |
| S2SEGO_30.FIN2 | 149   | 3.522  | 17.48  | 0.2    | 0.5993  | 0.0067  | 0.53108  | 2962   | 11  | 3027   | 27  | 2925   | 18  | 2925   | 18  | 3.487179 |
| S2SEGO_30.FIN2 | 66.2  | 1.451  | 19.75  | 0.2    | 0.6401  | 0.007   | 0.6357   | 3078.5 | 9.9 | 3193   | 27  | 3017   | 14  | 3017   | 14  | 5.83361  |
| S2SEGO_31.FIN2 | 83.3  | 1.142  | 0.762  | 0.01   | 0.0939  | 0.0011  | 0.3121   | 574.6  | 5.8 | 578.8  | 6.3 | 567    | 35  | 578.8  | 6.3 | 0.730943 |
| S2SEGO_33.FIN2 | 78.6  | 1.74   | 4.267  | 0.032  | 0.3129  | 0.0027  | 0.60631  | 1687.7 | 5.9 | 1755   | 13  | 1613   | 16  | 1613   | 16  | 8.803472 |
| S2SEGO_34.FIN2 | 513   | 1.564  | 2.526  | 0.026  | 0.2262  | 0.0033  | 0.94142  | 1279.1 | 7.6 | 1314   | 18  | 1231   | 17  | 1231   | 17  | 6.742486 |
| S2SEGO_35.FIN2 | 213.8 | 2.203  | 5.023  | 0.065  | 0.3339  | 0.0039  | 0.94881  | 1822   | 11  | 1857   | 19  | 1787   | 10  | 1787   | 10  | 3.91718  |
| S2SEGO_36.FIN2 | 52.1  | 1.081  | 1.681  | 0.022  | 0.1717  | 0.002   | 0.47169  | 1000.7 | 8.1 | 1021   | 11  | 964    | 22  | 1021   | 11  | 2.02858  |
| S2SEGO_37.FIN2 | 798   | 3.73   | 2.709  | 0.043  | 0.1951  | 0.0031  | 0.91384  | 1331   | 12  | 1149   | 17  | 1646   | 13  | 1149   | 17  | 13.67393 |
| S2SEGO_37.FIN2 | 248   | 1.366  | 5.263  | 0.055  | 0.3517  | 0.0046  | 0.70096  | 1862.6 | 8.8 | 1942   | 22  | 1783   | 19  | 1783   | 19  | 8.917555 |
| S2SEGO_38.FIN2 | 112.6 | 1.526  | 1.796  | 0.014  | 0.182   | 0.0014  | 0.15329  | 1043.8 | 5   | 1078   | 7.8 | 969    | 20  | 1078   | 7.8 | 3.27649  |
| S2SEGO_39.FIN2 | 106.1 | 2.195  | 0.7603 | 0.0097 | 0.09221 | 0.00096 | 0.3222   | 573.9  | 5.6 | 568.6  | 5.7 | 587    | 29  | 568.6  | 5.7 | 0.923506 |
| S2SEGO_40.FIN2 | 83.2  | 1.093  | 1.97   | 0.028  | 0.183   | 0.0032  | 0.62471  | 1104.8 | 9.6 | 1083   | 17  | 1151   | 29  | 1083   | 17  | 1.973208 |
| S2SEGO_40.FIN2 | 56.3  | 1.298  | 2.159  | 0.033  | 0.2005  | 0.0027  | 0.34819  | 1167   | 11  | 1178   | 14  | 1146   | 30  | 1178   | 14  | 0.942588 |
| S2SEGO_41.FIN2 | 37.3  | 0.935  | 0.906  | 0.023  | 0.1072  | 0.0014  | 0.005489 | 655    | 12  | 656.2  | 8   | 647    | 58  | 656.2  | 8   | 0.183206 |
| S2SEGO_42.FIN2 | 332   | 1.75   | 0.107  | 0.01   | 0.01518 | 0.00067 | 0.97484  | 102.3  | 9.2 | 97.1   | 4.3 | 193    | 99  | 97.1   | 4.3 | 5.083089 |
| S2SEGO_43.FIN2 | 201.8 | 1.109  | 1.923  | 0.013  | 0.1853  | 0.0013  | 0.37189  | 1089.5 | 4.7 | 1097.6 | 7   | 1098   | 15  | 1097.6 | 7   | 0.74346  |
| S2SEGO_44.FIN2 | 164   | 2.29   | 1.825  | 0.034  | 0.1804  | 0.003   | 0.73126  | 1054   | 12  | 1069   | 16  | 1020   | 24  | 1069   | 16  | 1.42315  |
| S2SEGO_45.FIN2 | 145   | 2.59   | 4.561  | 0.037  | 0.3161  | 0.0025  | 0.63059  | 1742.7 | 6.9 | 1770   | 12  | 1704   | 13  | 1704   | 13  | 3.873239 |
| S2SEGO_46.FIN2 | 236   | 1.459  | 0.2974 | 0.004  | 0.04147 | 0.00036 | 0.095358 | 264.3  | 3.2 | 261.9  | 2.2 | 278    | 37  | 261.9  | 2.2 | 0.908005 |

|                 |       |        |        |        |         |         |          |        |     |        |     |      |    |        |      |          |
|-----------------|-------|--------|--------|--------|---------|---------|----------|--------|-----|--------|-----|------|----|--------|------|----------|
| S2SEGO_47.FIN2  | 214.4 | 32.8   | 0.7893 | 0.0092 | 0.0973  | 0.001   | 0.5283   | 590.5  | 5.2 | 598.7  | 6.1 | 571  | 23 | 598.7  | 6.1  | 1.388654 |
| S2SEGO_48.FIN2  | 105.5 | 1.457  | 1.602  | 0.027  | 0.1661  | 0.0025  | 0.82267  | 970    | 11  | 990    | 14  | 910  | 26 | 990    | 14   | 2.061856 |
| S2SEGO_49.FIN2  | 32.1  | 0.969  | 1.847  | 0.035  | 0.1833  | 0.0027  | 0.36139  | 1061   | 13  | 1085   | 15  | 1007 | 42 | 1085   | 15   | 2.262017 |
| S2SEGO_50.FIN2  | 74.2  | 1.283  | 2.073  | 0.022  | 0.2008  | 0.0019  | 0.36397  | 1139.5 | 7.1 | 1179.6 | 9.9 | 1058 | 21 | 1179.6 | 9.9  | 3.519087 |
| S2SEGO_51.FIN2  | 292.5 | 1      | 1.988  | 0.026  | 0.1798  | 0.0027  | 0.76191  | 1110.9 | 8.8 | 1068   | 14  | 1214 | 20 | 1068   | 14   | 3.861734 |
| S2SEGO_52.FIN2  | 316   | 1.094  | 0.1224 | 0.006  | 0.01556 | 0.00021 | 0.52185  | 117    | 5.4 | 99.5   | 1.3 | 442  | 90 | 99.5   | 1.3  | 14.95726 |
| S2SEGO_53.FIN2  | 115.7 | 1.508  | 1.868  | 0.027  | 0.184   | 0.002   | 0.34808  | 1068.9 | 9.6 | 1089   | 11  | 1036 | 24 | 1089   | 11   | 1.880438 |
| S2SEGO_54.FIN2  | 17.2  | 0.789  | 1.971  | 0.042  | 0.1891  | 0.0027  | 0.00288  | 1104   | 14  | 1116   | 15  | 1069 | 48 | 1116   | 15   | 1.086957 |
| S2SEGO_55.FIN2  | 182   | 1.65   | 0.1146 | 0.003  | 0.01728 | 0.00027 | 0.12569  | 1104   | 2.7 | 110.4  | 1.7 | 118  | 61 | 110.4  | 1.7  | 0.27248  |
| S2SEGO_56.FIN2  | 118.8 | 0.9052 | 1.811  | 0.017  | 0.1759  | 0.0016  | 0.67256  | 1049.2 | 6.2 | 1044.5 | 8.9 | 1060 | 15 | 1044.5 | 8.9  | 0.44796  |
| S2SEGO_57.FIN2  | 49.8  | 0.792  | 1.793  | 0.022  | 0.1791  | 0.0017  | 0.13984  | 1043.5 | 8.2 | 1061.7 | 9.2 | 997  | 29 | 1061.7 | 9.2  | 1.74413  |
| S2SEGO_58.FIN2  | 58.5  | 2.137  | 1.862  | 0.021  | 0.1843  | 0.0019  | 0.44234  | 1067.3 | 7.5 | 1090   | 10  | 1016 | 25 | 1090   | 10   | 2.126862 |
| S2SEGO_60.FIN2  | 87.9  | 1.433  | 4.668  | 0.044  | 0.3189  | 0.0026  | 0.61144  | 1761   | 7.8 | 1784   | 13  | 1730 | 14 | 1730   | 14   | 3.121387 |
| S2SEGO_61.FIN2  | 93.2  | 1.017  | 0.0973 | 0.0035 | 0.01428 | 0.00027 | 0.18659  | 94.2   | 3.3 | 91.4   | 1.7 | 106  | 77 | 91.4   | 1.7  | 2.972399 |
| S2SEGO_62.FIN2  | 328   | 3.95   | 2.961  | 0.022  | 0.2442  | 0.0019  | 0.68549  | 1397.5 | 5.7 | 1408.4 | 9.8 | 1376 | 11 | 1376   | 11   | 2.354651 |
| S2SEGO_63.FIN2  | 274   | 3.784  | 4.66   | 0.056  | 0.3238  | 0.0037  | 0.64426  | 1762   | 11  | 1808   | 18  | 1705 | 18 | 1705   | 18   | 6.041056 |
| S2SEGO_64.FIN2  | 636   | 4.66   | 1.505  | 0.02   | 0.1515  | 0.0021  | 0.89835  | 933    | 7.9 | 909    | 12  | 988  | 14 | 909    | 12   | 2.572347 |
| S2SEGO_65.FIN2  | 950   | 2.34   | 0.1752 | 0.0032 | 0.02411 | 0.00077 | 0.65636  | 163.9  | 2.8 | 153.5  | 4.9 | 357  | 76 | 153.5  | 4.9  | 6.345333 |
| S2SEGO_66.FIN2  | 75.1  | 1.863  | 4.124  | 0.034  | 0.2995  | 0.0022  | 0.47244  | 1660.4 | 6.7 | 1688   | 11  | 1622 | 15 | 1622   | 15   | 4.069051 |
| S2SEGO_67.FIN2  | 88.2  | 0.865  | 13.8   | 0.13   | 0.5408  | 0.0069  | 0.6697   | 2735.7 | 9.1 | 2786   | 29  | 2689 | 16 | 2689   | 16   | 3.607289 |
| S2SEGO_68.FIN2  | 306.2 | 18     | 6.762  | 0.056  | 0.3953  | 0.003   | 0.72983  | 2080.5 | 7.3 | 2147   | 14  | 2016 | 10 | 2016   | 10   | 6.498016 |
| S2SEGO_69.FIN2  | 389   | 3.082  | 1.993  | 0.014  | 0.1943  | 0.0014  | 0.5944   | 1113.1 | 4.7 | 1144.6 | 7.3 | 1044 | 13 | 1144.6 | 7.3  | 2.829934 |
| S2SEGO_70.FIN2  | 366   | 1.052  | 0.1114 | 0.0024 | 0.01616 | 0.0002  | 0.07367  | 107.2  | 2.1 | 103.3  | 1.3 | 195  | 54 | 103.3  | 1.3  | 3.63806  |
| S2SEGO_71.FIN2  | 323   | 1.421  | 2.305  | 0.018  | 0.2078  | 0.0016  | 0.69823  | 1214.2 | 5.8 | 1216.9 | 8.6 | 1208 | 13 | 1208   | 13   | 0.736755 |
| S2SEGO_72.FIN2  | 40.8  | 1.184  | 1.686  | 0.023  | 0.169   | 0.0019  | 0.31009  | 1002.6 | 8.7 | 1007   | 10  | 1004 | 28 | 1007   | 10   | 4.338859 |
| S2SEGO_73.FIN2  | 76.7  | 1.076  | 1.535  | 0.019  | 0.1621  | 0.0014  | 0.35729  | 943.9  | 7.5 | 969.3  | 7.4 | 905  | 27 | 969.3  | 7.4  | 2.690963 |
| S2SEGO_74.FIN2  | 74.7  | 1.68   | 1.964  | 0.025  | 0.1918  | 0.0017  | 0.33782  | 1102.8 | 8.4 | 1131.1 | 9.4 | 1050 | 24 | 1131.1 | 9.4  | 2.566195 |
| S2SEGO_75.FIN2  | 13.43 | 0.539  | 4.43   | 0.18   | 0.0547  | 0.0023  | 0.78133  | 1712   | 35  | 345    | 14  | 4441 | 46 | DISC   | DISC | 79.84813 |
| S2SEGO_76.FIN2  | 120.3 | 1.623  | 0.88   | 0.013  | 0.1064  | 0.0014  | 0.47503  | 640.6  | 7   | 651.4  | 8.2 | 604  | 29 | 651.4  | 8.2  | 1.685919 |
| S2SEGO_77.FIN2  | 81.2  | 0.935  | 3.548  | 0.033  | 0.2751  | 0.0021  | 0.22065  | 1537.5 | 7.3 | 1566   | 11  | 1498 | 19 | 1498   | 19   | 4.539386 |
| S2SEGO_78.FIN2  | 260.9 | 2.36   | 4.536  | 0.071  | 0.3118  | 0.0047  | 0.86422  | 1738   | 13  | 1749   | 23  | 1728 | 16 | 1728   | 16   | 1.215278 |
| S2SEGO_79.FIN2  | 472   | 1.938  | 4.24   | 0.031  | 0.2891  | 0.0025  | 0.8269   | 1681.5 | 5.9 | 1637   | 12  | 1732 | 10 | 1732   | 10   | 5.484988 |
| S2SEGO_80.FIN2  | 280   | 1.512  | 0.1113 | 0.0021 | 0.01677 | 0.0022  | 0.16408  | 107.2  | 1.9 | 107.2  | 1.4 | 102  | 47 | 107.2  | 1.4  | 0        |
| S2SEGO_81.FIN2  | 25.75 | 1.35   | 2.424  | 0.034  | 0.2095  | 0.0025  | 0.31194  | 1249   | 10  | 1226   | 13  | 1291 | 33 | 1291   | 33   | 5.034857 |
| S2SEGO_82.FIN2  | 106   | 1.062  | 0.12   | 0.018  | 0.01655 | 0.00086 | 0.9792   | 108    | 11  | 105.8  | 5.4 | 126  | 97 | 105.8  | 5.4  | 2.037037 |
| S2SEGO_83.FIN2  | 84.6  | 1.25   | 4.901  | 0.058  | 0.33    | 0.0028  | 0.24335  | 1801.5 | 9.8 | 1838   | 14  | 1749 | 22 | 1749   | 22   | 5.088622 |
| S2SEGO_84.FIN2  | 55.2  | 0.488  | 4.276  | 0.037  | 0.3053  | 0.0022  | 0.51786  | 1688.4 | 7.1 | 1717   | 11  | 1652 | 15 | 1652   | 15   | 3.934625 |
| S2SEGO_85.FIN2  | 142.7 | 1.92   | 4.574  | 0.035  | 0.3142  | 0.0022  | 0.78286  | 1744.2 | 6.3 | 1761   | 11  | 1734 | 13 | 1734   | 13   | 1.557093 |
| S2SEGO_86.FIN2  | 38.67 | 1.707  | 7.16   | 0.14   | 0.3972  | 0.0084  | 0.80681  | 2132   | 18  | 2155   | 39  | 2105 | 20 | 2105   | 20   | 2.375297 |
| S2SEGO_87.FIN2  | 70.1  | 1.184  | 16.44  | 0.12   | 0.5884  | 0.0044  | 0.72074  | 2902.3 | 7.1 | 2982   | 18  | 2843 | 10 | 2843   | 10   | 4.889202 |
| S2SEGO_88.FIN2  | 168.8 | 7.51   | 1.688  | 0.025  | 0.168   | 0.0022  | 0.65213  | 1003.6 | 9.5 | 1001   | 12  | 1016 | 29 | 1001   | 12   | 0.259067 |
| S2SEGO_89.FIN2  | 290   | 0.6147 | 0.3834 | 0.0047 | 0.05301 | 0.0042  | 0.34937  | 329.9  | 3.4 | 332.9  | 2.6 | 311  | 27 | 332.9  | 2.6  | 0.903966 |
| S2SEGO_90.FIN2  | 101   | 0.5095 | 4.064  | 0.034  | 0.2905  | 0.0024  | 0.41482  | 1647.5 | 6.7 | 1646   | 12  | 1650 | 18 | 1650   | 18   | 0.242424 |
| S2SEGO_91.FIN2  | 160.6 | 1.97   | 3.182  | 0.052  | 0.2305  | 0.0029  | 0.82072  | 1452   | 13  | 1337   | 15  | 1626 | 17 | 1626   | 17   | 17.77368 |
| S2SEGO_92.FIN2  | 54.9  | 1.075  | 1.692  | 0.021  | 0.1745  | 0.0014  | 0.18441  | 1004.8 | 8   | 1036.9 | 7.9 | 955  | 27 | 1036.9 | 7.9  | 3.194666 |
| S2SEGO_93.FIN2  | 88.6  | 1.49   | 6.163  | 0.06   | 0.3749  | 0.0041  | 0.78859  | 1998.5 | 8.5 | 2054   | 20  | 1960 | 11 | 1960   | 11   | 4.795918 |
| S2SEGO_94.FIN2  | 300   | 0.858  | 0.1118 | 0.0018 | 0.01649 | 0.00019 | 0.057298 | 107.6  | 1.6 | 105.5  | 1.2 | 170  | 48 | 105.5  | 1.2  | 1.951673 |
| S2SEGO_95.FIN2  | 55.42 | 0.551  | 3.102  | 0.032  | 0.2552  | 0.0026  | 0.40935  | 1433.6 | 8.1 | 1465   | 13  | 1373 | 20 | 1373   | 20   | 6.700655 |
| S2SEGO_96.FIN2  | 353   | 1.1514 | 0.53   | 0.0055 | 0.06999 | 0.00066 | 0.40366  | 431.7  | 3.6 | 436.1  | 3.9 | 421  | 25 | 436.1  | 3.9  | 1.019226 |
| S2SEGO_97.FIN2  | 43.73 | 0.273  | 5.517  | 0.05   | 0.3543  | 0.0032  | 0.38615  | 1902.7 | 7.8 | 1955   | 15  | 1850 | 17 | 1850   | 17   | 5.675676 |
| S2SEGO_98.FIN2  | 75.7  | 0.5722 | 4.159  | 0.037  | 0.3001  | 0.0023  | 0.43754  | 1665.5 | 7.4 | 1692   | 11  | 1634 | 16 | 1634   | 16   | 3.549572 |
| S2SEGO_101.FIN2 | 54.9  | 0.6353 | 3.697  | 0.042  | 0.2821  | 0.0029  | 0.3841   | 1572.2 | 9.4 | 1602   | 15  | 1532 | 22 | 1532   | 22   | 4.569191 |
| S2SEGO_102.FIN2 | 314   | 1.014  | 0.0985 | 0.002  | 0.01531 | 0.00022 | 0.16811  | 95.4   | 1.8 | 97.9   | 1.4 | 52   | 48 | 97.9   | 1.4  | 2.620545 |
| S2SEGO_103.FIN2 | 121.1 | 1.349  | 4.96   | 0.037  | 0.3365  | 0.0026  | 0.68174  | 1812.2 | 6.3 | 1870   | 12  | 1743 | 11 | 1743   | 11   | 7.286288 |
| S2SEGO_104.FIN2 | 32.3  | 0.7299 | 4.338  | 0.048  | 0.3036  | 0.0034  | 0.42521  | 1699.9 | 9.1 | 1709   | 17  | 1689 | 23 | 1689   | 23   | 1.184133 |
| S2SEGO_105.FIN2 | 1156  | 2.132  | 0.1058 | 0.0015 | 0.01557 | 0.00019 | 0.3446   | 102.1  | 1.4 | 99.6   | 1.2 | 130  | 35 | 99.6   | 1.2  | 2.44858  |
| S2SEGO_106.FIN2 | 134   | 1.284  | 4.569  | 0.045  | 0.3226  | 0.0028  | 0.55575  | 1743.2 | 8.2 | 1802   | 13  | 1669 | 14 | 1669   | 14   | 7.968844 |
| S2SEGO_107.FIN2 | 250.7 | 1.887  | 0.1098 | 0.0024 | 0.01631 | 0.0022  | 0.12011  | 105.7  | 2.2 | 104.3  | 1.4 | 143  | 51 | 104.3  | 1.4  | 1.324503 |
| S2SEGO_108.FIN2 | 291   | 1.156  | 0.4218 | 0.0045 | 0.05742 | 0.0049  | 0.25834  | 357.2  | 3.2 | 359.9  | 3   | 341  | 25 | 359.9  | 3    | 0.755879 |
| S2SEGO_109.FIN2 | 322   | 1.746  | 0.1918 | 0.0031 | 0.028   | 0.00031 | 0.29511  | 178.1  | 2.6 | 178    | 2   | 172  | 38 | 178    | 2    | 0.056148 |
| S2SEGO_110.FIN2 | 101.5 | 1.524  | 1.889  | 0.027  | 0.1811  | 0.002   | 0.71449  | 1076.4 | 9.3 | 1073   | 11  | 1073 | 19 | 1073   | 11   | 0.315868 |
| S2SEGO_111.FIN2 | 326   | 0.835  | 0.8688 | 0.0071 | 0.10466 | 0.0067  | 0.3863   | 634.8  | 3.9 | 641.6  | 3.9 | 602  | 18 | 641.6  | 3.9  | 1.071204 |
| S2SEGO_112.FIN2 | 167   | 1.098  | 0.5445 | 0.0059 | 0.07154 | 0.00072 | 0.052511 | 441.2  | 3.9 | 445.4  | 4.3 | 410  | 33 | 445.4  | 4.3  | 0.951949 |
| S2SEGO_113.FIN2 | 70.6  | 0.942  | 4.163  | 0.04   | 0.3059  | 0.0029  | 0.55284  | 1666.2 | 7.8 | 1720   | 14  | 1590 | 18 | 1590   | 18   | 8.176101 |
| S2SEGO_114.FIN2 | 32.24 | 1.137  | 2.308  | 0.043  | 0.2071  | 0.0027  | 0.41458  | 1214   | 13  | 1213   | 14  | 1187 | 35 | 1187   | 14   | 0.082372 |
| S2SEGO_115.FIN2 | 57    | 1.3    | 0.796  | 0.016  | 0.0985  | 0.0011  | 0.31396  | 596    | 8.4 | 605.8  | 6.6 | 544  | 44 | 605.8  | 6.6  | 1.644295 |
| S2SEGO_116.FIN2 | 225.1 | 1.16   | 2.631  | 0.051  | 0.2078  | 0.0025  | 0.38014  | 1309   | 14  | 1217   | 13  | 1445 | 40 | 1445   | 40   | 15.77855 |
| S2SEGO_117.FIN2 | 55.2  | 1.005  | 4.264  | 0.047  | 0.3026  | 0.0027  | 0.56596  | 1685.7 | 9.1 | 1704   | 13  | 1651 | 18 | 1651   | 18   | 3.210176 |
| S2SEGO_118.FIN2 | 468   | 1.53   | 0.3034 | 0.0045 | 0.04259 | 0.00041 | 0.31511  | 268.9  | 3.5 | 268.9  | 2.5 | 258  | 33 | 268.9  | 2.5  | 0        |
| S2SEGO_119.FIN2 | 119.2 | 0.8897 | 0.1084 | 0.0037 | 0.01608 | 0.0003  | 0.039389 | 104.4  | 3.4 | 103.1  | 1.8 | 139  | 79 | 103.1  | 1.8  | 1.245211 |
| S2SEGO_120.FIN2 | 82.5  | 1.069  | 3.663  | 0.05   | 0.2821  | 0.0033  | 0.86952  | 1562   | 11  | 1602   | 17  | 1494 | 18 | 1494   | 18   | 7.228916 |

|               |     |       |       |        |         |         |         |    |
|---------------|-----|-------|-------|--------|---------|---------|---------|----|
| S1LOYD_1.FIN2 | 442 | 1.958 | 0.105 | 0.0018 | 0.01633 | 0.00021 | 0.39125 | 10 |
|---------------|-----|-------|-------|--------|---------|---------|---------|----|

|                |       |        |        |        |         |         |          |        |     |        |     |        |     |        |      |          |
|----------------|-------|--------|--------|--------|---------|---------|----------|--------|-----|--------|-----|--------|-----|--------|------|----------|
| S1LOYD_20.FIN2 | 328   | 0.985  | 0.0871 | 0.0016 | 0.0136  | 0.00017 | 0.084714 | 84.7   | 1.5 | 87.1   | 1.1 | 134    | 23  | 87.1   | 1.1  | 2.83353  |
| S1LOYD_21.FIN2 | 252   | 0.8407 | 0.5445 | 0.0063 | 0.07085 | 0.00059 | 0.29787  | 441.2  | 4.2 | 441.3  | 3.6 | 437    | 16  | 441.3  | 3.6  | 0.022665 |
| S1LOYD_22.FIN2 | 97.8  | 0.928  | 1.87   | 0.017  | 0.1793  | 0.0016  | 0.42396  | 1071   | 6.2 | 1063.1 | 8.5 | 1085   | 14  | 1063.1 | 8.5  | 0.737628 |
| S1LOYD_23.FIN2 | 306   | 1.817  | 0.5634 | 0.0091 | 0.0731  | 0.0012  | 0.88848  | 453.4  | 5.9 | 454.6  | 7   | 460    | 13  | 454.6  | 7    | 0.264667 |
| S1LOYD_24.FIN2 | 335   | 0.936  | 0.1147 | 0.0024 | 0.0155  | 0.00016 | 0.15506  | 110.2  | 2.2 | 99.1   | 1   | 379    | 26  | 99.1   | 1    | 10.0726  |
| S1LOYD_26.FIN2 | 143.2 | 1.654  | 5.19   | 0.034  | 0.3311  | 0.0024  | 0.55183  | 1850.7 | 5.5 | 1844   | 11  | 1855.3 | 6.1 | 1855.3 | 6.1  | 0.609066 |
| S1LOYD_27.FIN2 | 123.9 | 1.14   | 7.3    | 0.16   | 0.3622  | 0.007   | 0.91908  | 2148   | 19  | 1991   | 33  | 2306.6 | 9.4 | 2306.6 | 9.4  | 13.68248 |
| S1LOYD_28.FIN2 | 332   | 1.627  | 2.084  | 0.024  | 0.2008  | 0.0025  | 0.74105  | 1143.2 | 7.8 | 1179   | 14  | 1074   | 11  | 1179   | 14   | 3.131561 |
| S1LOYD_29.FIN2 | 25.2  | 0.5693 | 2.247  | 0.04   | 0.203   | 0.0026  | 0.44032  | 1196   | 12  | 1193   | 14  | 1207   | 22  | 1193   | 14   | 0.250836 |
| S1LOYD_30.FIN2 | 223   | 1.143  | 3.709  | 0.043  | 0.2779  | 0.0031  | 0.96146  | 1568   | 11  | 1580   | 16  | 1558.6 | 8   | 1558.6 | 8    | 1.373027 |
| S1LOYD_31.FIN2 | 493.2 | 1.354  | 0.1191 | 0.0051 | 0.0162  | 0.00017 | 0.30742  | 114.1  | 4.5 | 103.6  | 1   | 322    | 71  | 103.6  | 1    | 9.202454 |
| S1LOYD_32.FIN2 | 414   | 1.736  | 3.831  | 0.044  | 0.2255  | 0.0025  | 0.8277   | 1598.7 | 9.2 | 1311   | 13  | 1999.1 | 8.5 | DISC   | DISC | 34.42049 |
| S1LOYD_33.FIN2 | 177   | 1.075  | 2.884  | 0.024  | 0.2365  | 0.0019  | 0.53174  | 1377.3 | 6.2 | 1369.5 | 9.4 | 1377.1 | 8.9 | 1377.1 | 8.9  | 0.551884 |
| S1LOYD_34.FIN2 | 37.9  | 0.914  | 1.823  | 0.037  | 0.1757  | 0.0025  | 0.83722  | 1052   | 14  | 1043   | 14  | 1083   | 19  | 1043   | 14   | 0.855513 |
| S1LOYD_36.FIN2 | 189   | 1.275  | 0.3766 | 0.006  | 0.05215 | 0.00061 | 0.18207  | 325    | 4.5 | 327.7  | 3.7 | 309    | 22  | 327.7  | 3.7  | 0.830769 |
| S1LOYD_37.FIN2 | 45    | 1.535  | 13.46  | 0.11   | 0.5291  | 0.0056  | 0.66341  | 2712.2 | 7.7 | 2737   | 24  | 2700.1 | 7.4 | 2700.1 | 7.4  | 1.366616 |
| S1LOYD_38.FIN2 | 32.3  | 1.101  | 4.383  | 0.064  | 0.3064  | 0.0034  | 0.78638  | 1708   | 12  | 1723   | 17  | 1693   | 18  | 1693   | 18   | 1.772002 |
| S1LOYD_39.FIN2 | 419   | 6.9    | 2.383  | 0.046  | 0.2116  | 0.0037  | 0.91772  | 1236   | 14  | 1240   | 19  | 1244.8 | 9.1 | 1244.8 | 9.1  | 0.385604 |
| S1LOYD_40.FIN2 | 154.6 | 0.643  | 7.173  | 0.041  | 0.3991  | 0.0027  | 0.58147  | 2132.9 | 5.1 | 2165   | 12  | 2102   | 6.1 | 2102   | 6.1  | 2.997146 |
| S1LOYD_41.FIN2 | 110.3 | 1.632  | 1.957  | 0.021  | 0.1883  | 0.0015  | 0.43188  | 1101.5 | 7.5 | 1112   | 8   | 1096   | 13  | 1112   | 8    | 0.953246 |
| S1LOYD_42.FIN2 | 150   | 1.25   | 0.0913 | 0.0027 | 0.01362 | 0.00023 | 0.008849 | 88.6   | 2.5 | 87.2   | 1.5 | 209    | 33  | 87.2   | 1.5  | 1.580135 |
| S1LOYD_43.FIN2 | 311   | 1.58   | 0.8    | 0.015  | 0.0935  | 0.0019  | 0.91461  | 595.9  | 8.8 | 576    | 12  | 705    | 19  | 576    | 12   | 3.339486 |
| S1LOYD_44.FIN2 | 113.4 | 2.312  | 1.762  | 0.014  | 0.1746  | 0.0016  | 0.34151  | 1031.4 | 5.2 | 1037.6 | 8.9 | 1025   | 14  | 1037.6 | 8.9  | 0.601125 |
| S1LOYD_45.FIN2 | 111   | 1.708  | 2.076  | 0.023  | 0.1942  | 0.0022  | 0.53711  | 1141.8 | 7.8 | 1144   | 12  | 1151   | 13  | 1144   | 12   | 0.192678 |
| S1LOYD_46.FIN2 | 61.19 | 1.071  | 2.259  | 0.023  | 0.2078  | 0.0017  | 0.34326  | 1199.2 | 7.1 | 1216.9 | 9.1 | 1169   | 13  | 1169   | 9.1  | 1.475984 |
| S1LOYD_47.FIN2 | 43.9  | 1.302  | 2.008  | 0.024  | 0.19    | 0.0018  | 0.39901  | 1117.5 | 8   | 1121   | 10  | 1119   | 16  | 1121   | 10   | 0.313199 |
| S1LOYD_48.FIN2 | 210.3 | 0.893  | 4.254  | 0.03   | 0.3052  | 0.0023  | 0.68601  | 1684.1 | 5.8 | 1717   | 11  | 1650.9 | 6.9 | 1650.9 | 6.9  | 4.003877 |
| S1LOYD_49.FIN2 | 269   | 2.856  | 4.877  | 0.028  | 0.331   | 0.0023  | 0.53615  | 1798.1 | 4.8 | 1845   | 11  | 1741.4 | 5.1 | 1741.4 | 5.1  | 5.949236 |
| S1LOYD_50.FIN2 | 38.6  | 1.188  | 1.832  | 0.03   | 0.1824  | 0.0022  | 0.45702  | 1056   | 11  | 1080   | 12  | 1000   | 19  | 1080   | 12   | 2.272727 |
| S1LOYD_51.FIN2 | 38.1  | 0.96   | 1.788  | 0.025  | 0.1777  | 0.0025  | 0.25305  | 1041.5 | 9   | 1054   | 14  | 1038   | 19  | 1054   | 14   | 1.200192 |
| S1LOYD_52.FIN2 | 586   | 1.204  | 0.1041 | 0.0015 | 0.01579 | 0.00018 | 0.37848  | 100.5  | 1.4 | 101    | 1.1 | 104    | 17  | 101    | 1.1  | 0.497512 |
| S1LOYD_53.FIN2 | 29.7  | 1.71   | 3.462  | 0.059  | 0.2532  | 0.0036  | 0.33476  | 1517   | 13  | 1455   | 18  | 1597   | 22  | 1597   | 22   | 8.891672 |
| S1LOYD_54.FIN2 | 212   | 0.7795 | 1.811  | 0.015  | 0.1806  | 0.0013  | 0.43441  | 1049.9 | 5.5 | 1070   | 6.9 | 1009.7 | 9.1 | 1070   | 6.9  | 1.914468 |
| S1LOYD_55.FIN2 | 262   | 2.4    | 4.741  | 0.029  | 0.3199  | 0.0021  | 0.63812  | 1775   | 5   | 1789   | 10  | 1750.8 | 6.5 | 1750.8 | 6.5  | 2.18186  |
| S1LOYD_56.FIN2 | 139.1 | 1.321  | 4.815  | 0.031  | 0.3241  | 0.0019  | 0.36889  | 1787.2 | 5.5 | 1809.8 | 9.4 | 1759.4 | 8.2 | 1759.4 | 8.2  | 2.864613 |
| S1LOYD_57.FIN2 | 35    | 1.652  | 1.7    | 0.023  | 0.1699  | 0.0017  | 0.30316  | 1007.9 | 8.7 | 1011.3 | 9.3 | 1003   | 16  | 1011.3 | 9.3  | 0.337335 |
| S1LOYD_58.FIN2 | 371   | 1.482  | 3.107  | 0.024  | 0.2536  | 0.0024  | 0.95298  | 1434.2 | 6   | 1457   | 12  | 1404.7 | 8.5 | 1404.7 | 8.5  | 3.723215 |
| S1LOYD_59.FIN2 | 166.7 | 2.06   | 2.093  | 0.024  | 0.1939  | 0.0019  | 0.4811   | 1145.9 | 7.8 | 1142   | 10  | 1157   | 12  | 1142   | 10   | 0.340344 |
| S1LOYD_60.FIN2 | 16.3  | 0.823  | 1.724  | 0.038  | 0.1689  | 0.0026  | 0.29564  | 1018   | 14  | 1006   | 14  | 1034   | 25  | 1006   | 14   | 1.178782 |
| S1LOYD_62.FIN2 | 146   | 1.111  | 3.493  | 0.036  | 0.2607  | 0.0031  | 0.90228  | 1525   | 8.3 | 1493   | 16  | 1569.9 | 8   | 1569.9 | 8    | 4.898401 |
| S1LOYD_63.FIN2 | 69.7  | 1.473  | 3.307  | 0.033  | 0.2653  | 0.0022  | 0.42887  | 1482   | 7.7 | 1517   | 11  | 1436.3 | 8.5 | 1436.3 | 8.5  | 5.618603 |
| S1LOYD_64.FIN2 | 219.3 | 1.688  | 3.51   | 0.039  | 0.2708  | 0.0027  | 0.8277   | 1528.8 | 8.9 | 1545   | 13  | 1510.1 | 7.4 | 1510.1 | 7.4  | 2.311105 |
| S1LOYD_65.FIN2 | 254   | 2.17   | 2.125  | 0.021  | 0.1948  | 0.002   | 0.66295  | 1156.7 | 6.9 | 1150   | 11  | 1177   | 11  | 1150   | 11   | 0.579234 |
| S1LOYD_66.FIN2 | 93.2  | 1.418  | 1.978  | 0.02   | 0.1896  | 0.0017  | 0.42079  | 1107.6 | 7   | 1118.9 | 9.1 | 1095   | 14  | 1118.9 | 9.1  | 1.020224 |
| S1LOYD_67.FIN2 | 489   | 1.223  | 3.865  | 0.063  | 0.2683  | 0.0043  | 0.93578  | 1606   | 13  | 1532   | 22  | 1707.6 | 7.6 | 1707.6 | 7.6  | 10.28344 |
| S1LOYD_68.FIN2 | 191.2 | 1.93   | 4.232  | 0.029  | 0.3041  | 0.0023  | 0.50924  | 1680   | 5.7 | 1711   | 11  | 1646.3 | 6.2 | 1646.3 | 6.2  | 3.930025 |
| S1LOYD_69.FIN2 | 528   | 1.688  | 0.1032 | 0.0015 | 0.0154  | 0.00013 | 0.076431 | 99.7   | 1.4 | 98.53  | 0.8 | 162    | 23  | 98.53  | 0.8  | 1.173521 |
| S1LOYD_70.FIN2 | 124.8 | 0.887  | 0.5456 | 0.0097 | 0.07047 | 0.00073 | 0.21067  | 441.7  | 6.4 | 438.9  | 4.4 | 471    | 23  | 438.9  | 4.4  | 0.633914 |
| S1LOYD_72.FIN2 | 26.62 | 0.887  | 2.344  | 0.039  | 0.2124  | 0.0023  | 0.5277   | 1224   | 12  | 1242   | 12  | 1210   | 21  | 1210   | 21   | 2.644628 |
| S1LOYD_73.FIN2 | 132.9 | 0.7266 | 0.933  | 0.049  | 0.0959  | 0.001   | 0.53231  | 664    | 25  | 590.2  | 6   | 897    | 87  | 590.2  | 6    | 11.11446 |
| S1LOYD_74.FIN2 | 322   | 1.295  | 0.106  | 0.0023 | 0.01625 | 0.00022 | 0.12375  | 102.2  | 2.1 | 103.9  | 1.4 | 154    | 27  | 103.9  | 1.4  | 1.663405 |
| S1LOYD_75.FIN2 | 143   | 1.983  | 2.931  | 0.018  | 0.2455  | 0.0019  | 0.35794  | 1389.8 | 4.8 | 1414.8 | 9.7 | 1357   | 9.4 | 1357   | 9.4  | 4.259396 |
| S1LOYD_76.FIN2 | 200   | 1.218  | 3.438  | 0.052  | 0.2402  | 0.0035  | 0.95646  | 1512   | 12  | 1387   | 18  | 1699.6 | 9   | 1699.6 | 9    | 18.39256 |
| S1LOYD_77.FIN2 | 146   | 0.836  | 0.1013 | 0.0032 | 0.01488 | 0.00025 | 0.11696  | 97.9   | 3   | 95.2   | 1.6 | 214    | 36  | 95.2   | 1.6  | 2.757916 |
| S1LOYD_78.FIN2 | 223.9 | 1.869  | 4.342  | 0.037  | 0.2978  | 0.0029  | 0.79771  | 1702   | 7.3 | 1682   | 14  | 1726.3 | 8.2 | 1726.3 | 8.2  | 2.566182 |
| S1LOYD_79.FIN2 | 265   | 0.862  | 0.103  | 0.0021 | 0.01593 | 0.00024 | 0.40748  | 99.5   | 2   | 101.9  | 1.5 | 110    | 22  | 101.9  | 1.5  | 2.41206  |
| S1LOYD_80.FIN2 | 149.5 | 1.057  | 13.95  | 0.15   | 0.5488  | 0.0054  | 0.79837  | 2747.1 | 9.6 | 2819   | 23  | 2704.7 | 8   | 2704.7 | 8    | 4.225977 |
| S1LOYD_81.FIN2 | 105.6 | 1.536  | 5.183  | 0.043  | 0.3347  | 0.0027  | 0.49348  | 1850.3 | 7.3 | 1861   | 13  | 1849   | 11  | 1849   | 11   | 0.648999 |
| S1LOYD_82.FIN2 | 51.1  | 1.193  | 13.97  | 0.35   | 0.5363  | 0.008   | 0.8982   | 2745   | 23  | 2771   | 33  | 2723   | 18  | 2723   | 18   | 1.762762 |
| S1LOYD_83.FIN2 | 63    | 1.62   | 1.85   | 0.042  | 0.1699  | 0.0035  | 0.7039   | 1065   | 14  | 1011   | 19  | 1192   | 22  | 1011   | 19   | 5.070423 |
| S1LOYD_84.FIN2 | 403   | 0.693  | 0.5226 | 0.0069 | 0.06819 | 0.00077 | 0.80209  | 426.7  | 4.6 | 425.2  | 4.7 | 432    | 11  | 425.2  | 4.7  | 0.351535 |
| S1LOYD_85.FIN2 | 140.7 | 0.689  | 4.9    | 0.031  | 0.3286  | 0.0022  | 0.41041  | 1802.1 | 5.3 | 1831   | 11  | 1772.4 | 8.3 | 1772.4 | 8.3  | 3.306251 |
| S1LOYD_86.FIN2 | 46.8  | 0.6209 | 5.979  | 0.051  | 0.3533  | 0.0032  | 0.4927   | 1973.4 | 7.2 | 1950   | 15  | 1997.1 | 8.4 | 1997.1 | 8.4  | 2.35842  |
| S1LOYD_89.FIN2 | 292   | 0.886  | 0.0976 | 0.0019 | 0.01517 | 0.00017 | 0.11959  | 94.5   | 1.7 | 97     | 1.1 | 124    | 21  | 97     | 1.1  | 2.645503 |
| S1LOYD_90.FIN2 | 176   | 1.548  | 2.935  | 0.056  | 0.2454  | 0.0039  | 0.96995  | 1385   | 17  | 1414   | 20  | 1365.9 | 9.7 | 1365.9 | 9.7  | 3.521488 |
| S1LOYD_91.FIN2 | 290   | 3.29   | 1.538  | 0.018  | 0.1582  | 0.0017  | 0.61356  | 945.4  | 7   | 946.4  | 9.5 | 933    | 11  | 946.4  | 9.5  | 0.105775 |
| S1LOYD_92.FIN2 | 51.2  | 0.708  | 2.705  | 0.028  | 0.2328  | 0.002   | 0.47111  | 1330.3 | 7.9 | 1349   | 11  | 1302   | 11  | 1302   | 11   | 3.609831 |
| S1LOYD_93.FIN2 | 64.2  | 0.834  | 3.878  | 0.052  | 0.2922  | 0.0029  | 0.60382  | 1609   | 11  | 1652   | 14  | 1557   | 12  | 1557   | 12   | 6.101477 |
| S1LOYD_94.FIN2 | 106.4 | 0.99   | 4.067  | 0.028  | 0.2912  | 0.0024  | 0.44539  | 1647.3 | 5.6 | 1647   | 12  | 1647.8 | 8.3 | 1647.8 | 8.3  | 0.04855  |
| S1LOYD_95.FIN2 | 37    | 0.852  | 1.861  | 0.034  | 0.1806  | 0.002   | 0.44765  | 1066   | 12  | 1071   | 11  | 1056   | 20  | 1071   | 11   | 0.469043 |
| S1LOYD_96.FIN2 | 62.1  | 1.23   | 2.362  | 0.096  | 0.208   | 0.0068  | 0.92589  | 1236   | 29  | 1222   | 35  | 1268   | 23  | 1268   | 23   | 3.62776  |
| S1LOYD_97.FIN2 | 32    | 0.7546 | 2.956  | 0.036  | 0.2488  | 0.0028  | 0.4771   | 1395.5 |     |        |     |        |     |        |      |          |

|                 |       |       |        |        |         |         |         |        |     |       |     |      |    |       |     |          |
|-----------------|-------|-------|--------|--------|---------|---------|---------|--------|-----|-------|-----|------|----|-------|-----|----------|
| S1LOYD_118.FIN2 | 197   | 0.698 | 0.5562 | 0.0087 | 0.07278 | 0.0008  | 0.64756 | 448.8  | 5.7 | 452.8 | 4.8 | 461  | 19 | 452.8 | 4.8 | 0.891266 |
| S1LOYD_119.FIN2 | 277   | 1.105 | 0.0998 | 0.0021 | 0.01518 | 0.00017 | 0.1411  | 96.6   | 2   | 97.1  | 1.1 | 167  | 31 | 97.1  | 1.1 | 0.517598 |
| S1LOYD_120.FIN2 | 268.8 | 0.919 | 0.1103 | 0.0027 | 0.01564 | 0.00022 | 0.29871 | 106.2  | 2.4 | 100   | 1.4 | 290  | 30 | 100   | 1.4 | 5.838041 |
| S1LOYD_121.FIN2 | 316   | 2.34  | 0.4618 | 0.0059 | 0.06182 | 0.00054 | 0.43257 | 385.3  | 4.1 | 386.6 | 3.3 | 391  | 15 | 386.6 | 3.3 | 0.337399 |
| S1LOYD_123.FIN2 | 119   | 1.475 | 0.5507 | 0.0088 | 0.07202 | 0.00083 | 0.28796 | 445.1  | 5.8 | 448.3 | 5   | 439  | 21 | 448.3 | 5   | 0.71894  |
| S1LOYD_124.FIN2 | 55    | 2     | 0.836  | 0.016  | 0.0991  | 0.001   | 0.1979  | 617.1  | 8.9 | 608.9 | 5.9 | 645  | 25 | 608.9 | 5.9 | 1.328796 |
| S1LOYD_125.FIN2 | 23.07 | 1.898 | 3.983  | 0.048  | 0.283   | 0.0031  | 0.15078 | 1629.9 | 9.8 | 1606  | 16  | 1670 | 15 | 1670  | 15  | 3.832335 |

|                    |       |        |          |        |         |         |          |        |     |        |      |        |     |        |      |          |
|--------------------|-------|--------|----------|--------|---------|---------|----------|--------|-----|--------|------|--------|-----|--------|------|----------|
| 13MARAP0S1_1.FIN2  | 153   | 1.09   | 4.349    | 0.048  | 0.3025  | 0.0033  | 0.87046  | 1705.2 | 9.2 | 1703   | 16   | 1706   | 10  | 1706   | 10   | 0.17585  |
| 13MARAP0S1_2.FIN2  | 59.3  | 1.486  | 0.939    | 0.079  | 0.0853  | 0.0018  | 0.95653  | 673    | 42  | 528    | 11   | 1160   | 150 | 528    | 11   | 21.54532 |
| 13MARAP0S1_3.FIN2  | 220   | 0.891  | 0.1725   | 0.0039 | 0.02533 | 0.00032 | 0.78315  | 161.5  | 3.3 | 161.3  | 2    | 185    | 23  | 161.3  | 2    | 0.123839 |
| 13MARAP0S1_4.FIN2  | 94.5  | 1.65   | 6.109    | 0.035  | 0.367   | 0.0027  | 0.79344  | 1992.9 | 4.9 | 2017   | 13   | 1964.5 | 7.3 | 1964.5 | 7.3  | 2.672436 |
| 13MARAP0S1_5.FIN2  | 120.6 | 1.089  | 4.511    | 0.035  | 0.3066  | 0.0025  | 0.85984  | 1732.6 | 6.4 | 1724   | 12   | 1749.4 | 8.9 | 1749.4 | 8.9  | 1.451926 |
| 13MARAP0S1_6.FIN2  | 135   | 0.8    | 1.978    | 0.033  | 0.188   | 0.0021  | 0.80283  | 1107   | 11  | 1110   | 11   | 1099   | 13  | 1110   | 11   | 0.271003 |
| 13MARAP0S1_7.FIN2  | 234   | 1.455  | 5.047    | 0.042  | 0.3349  | 0.0025  | 0.84941  | 1826.8 | 7   | 1862   | 12   | 1782.7 | 6.5 | 1782.7 | 6.5  | 4.448309 |
| 13MARAP0S1_8.FIN2  | 113.6 | 0.879  | 2.739    | 0.022  | 0.232   | 0.0018  | 0.80028  | 1338.7 | 6.1 | 1344.9 | 9.5  | 1325   | 10  | 1325   | 10   | 1.501887 |
| 13MARAP0S1_9.FIN2  | 113   | 0.41   | 2.173    | 0.057  | 0.1722  | 0.0036  | 0.99958  | 1172   | 18  | 1024   | 20   | 1446   | 22  | 1024   | 20   | 12.62799 |
| 13MARAP0S1_10.FIN2 | 355   | 3.036  | 4.873    | 0.025  | 0.3276  | 0.0018  | 0.81246  | 1797.5 | 4.3 | 1826.6 | 8.7  | 1752.9 | 7   | 1752.9 | 7    | 4.204461 |
| 13MARAP0S1_11.FIN2 | 73    | 2.41   | 12.91    | 0.31   | 0.4953  | 0.0078  | 0.9794   | 2670   | 22  | 2597   | 33   | 2731   | 24  | 2731   | 24   | 4.906628 |
| 13MARAP0S1_13.FIN2 | 137   | 1.203  | 0.8166   | 0.0095 | 0.09921 | 0.00089 | 0.64819  | 605.9  | 5.3 | 609.7  | 5.2  | 569    | 14  | 609.7  | 5.2  | 0.627166 |
| 13MARAP0S1_14.FIN2 | 236   | 0.624  | 0.2784   | 0.0042 | 0.03916 | 0.00035 | 0.6914   | 249.3  | 3.3 | 247.6  | 2.2  | 253    | 22  | 247.6  | 2.2  | 0.681909 |
| 13MARAP0S1_15.FIN2 | 289   | 9.69   | 13.24    | 0.21   | 0.4907  | 0.0065  | 0.98786  | 2698   | 15  | 2573   | 28   | 2774.5 | 8.5 | 2774.5 | 8.5  | 7.26257  |
| 13MARAP0S1_16.FIN2 | 325   | 2.853  | 4.03     | 0.049  | 0.2804  | 0.0035  | 0.93184  | 1640   | 10  | 1595   | 17   | 1680.1 | 5.4 | 1680.1 | 5.4  | 5.065175 |
| 13MARAP0S1_17.FIN2 | 263   | 1.128  | 0.0941   | 0.0022 | 0.01399 | 0.00019 | 0.84476  | 91.2   | 2   | 89.6   | 1.2  | 177    | 30  | 89.6   | 1.2  | 1.754386 |
| 13MARAP0S1_18.FIN2 | 268   | 1.523  | 3.245    | 0.025  | 0.2576  | 0.0017  | 0.79341  | 1467.8 | 6   | 1477.6 | 8.9  | 1433.3 | 8.7 | 1433.3 | 8.7  | 3.09077  |
| 13MARAP0S1_19.FIN2 | 251   | 1.834  | 4.452    | 0.034  | 0.3038  | 0.0022  | 0.85646  | 1721.7 | 6.3 | 1710   | 11   | 1730.4 | 7.3 | 1730.4 | 7.3  | 1.178918 |
| 13MARAP0S1_21.FIN2 | 55.5  | 0.644  | 4.982    | 0.046  | 0.3236  | 0.0027  | 0.81919  | 1817   | 8   | 1807   | 13   | 1827   | 11  | 1827   | 11   | 1.094691 |
| 13MARAP0S1_22.FIN2 | 177   | 1.54   | 0.1076   | 0.0074 | 0.01486 | 0.00028 | 0.9145   | 101.7  | 5.7 | 95.1   | 1.8  | 400    | 130 | 95.1   | 1.8  | 6.489676 |
| 13MARAP0S1_23.FIN2 | 85    | 1.216  | 5.671    | 0.04   | 0.349   | 0.0028  | 0.78083  | 1926.6 | 6.1 | 1930   | 14   | 1911.2 | 8.1 | 1911.2 | 8.1  | 0.983675 |
| 13MARAP0S1_24.FIN2 | 73.4  | 1.667  | 2.411    | 0.024  | 0.2126  | 0.0019  | 0.74047  | 1245.5 | 7   | 1242   | 10   | 1242   | 13  | 1242   | 13   | 0        |
| 13MARAP0S1_25.FIN2 | 207   | 1.301  | 3.898    | 0.027  | 0.2854  | 0.0022  | 0.77178  | 1612.9 | 5.6 | 1618   | 11   | 1598.5 | 7.8 | 1598.5 | 7.8  | 1.219894 |
| 13MARAP0S1_26.FIN2 | 54.1  | 0.6489 | 12.15    | 0.21   | 0.499   | 0.0051  | 0.89068  | 2614   | 15  | 2609   | 22   | 2614   | 24  | 2614   | 24   | 0.191278 |
| 13MARAP0S1_27.FIN2 | 463   | 43.2   | 1.575    | 0.031  | 0.1588  | 0.0027  | 0.92812  | 960    | 12  | 950    | 15   | 994    | 23  | 950    | 15   | 1.041667 |
| 13MARAP0S1_27.FIN2 | 58.8  | 1.514  | 4.563    | 0.059  | 0.3038  | 0.0034  | 0.89517  | 1744   | 10  | 1710   | 17   | 1768   | 12  | 1768   | 12   | 3.280543 |
| 13MARAP0S1_28.FIN2 | 260   | 1.7    | 4.521    | 0.056  | 0.3028  | 0.0074  | 0.97858  | 1734   | 10  | 1704   | 37   | 1741   | 14  | 1741   | 14   | 1.212515 |
| 13MARAP0S1_29.FIN2 | 259   | 1.578  | 0.1027   | 0.0022 | 0.01452 | 0.00013 | 0.72879  | 99.2   | 2   | 92.91  | 0.85 | 275    | 33  | 92.91  | 0.85 | 6.340726 |
| 13MARAP0S1_30.FIN2 | 332   | 1.664  | 0.1074   | 0.0023 | 0.01615 | 0.0002  | 0.68137  | 103.6  | 2.1 | 103.3  | 1.2  | 159    | 29  | 103.3  | 1.2  | 0.289575 |
| 13MARAP0S1_31.FIN2 | 258   | 4.73   | 0.11     | 0.011  | 0.01422 | 0.00022 | 0.98801  | 104.8  | 9.2 | 91     | 1.4  | 470    | 130 | 91     | 1.4  | 13.16794 |
| 13MARAP0S1_32.FIN2 | 175.9 | 1.849  | 3.183    | 0.03   | 0.2555  | 0.0024  | 0.68506  | 1453.9 | 7.5 | 1467   | 12   | 1429.3 | 9.7 | 1429.3 | 9.7  | 2.637655 |
| 13MARAP0S1_33.FIN2 | 213.2 | 2.111  | 1.765    | 0.014  | 0.1715  | 0.001   | 0.55198  | 1032.4 | 5   | 1020.6 | 5.8  | 1051.7 | 9.8 | 1020.6 | 5.8  | 1.142968 |
| 13MARAP0S1_34.FIN2 | 96.1  | 1.216  | 6.875    | 0.048  | 0.3889  | 0.003   | 0.86706  | 2095.9 | 6   | 2117   | 14   | 2072.3 | 6.7 | 2072.3 | 6.7  | 2.157024 |
| 13MARAP0S1_35.FIN2 | 78.8  | 1.493  | 4.818    | 0.038  | 0.324   | 0.0021  | 0.78266  | 1787.6 | 6.6 | 1809   | 10   | 1766.8 | 8.1 | 1766.8 | 8.1  | 2.388499 |
| 13MARAP0S1_36.FIN2 | 120   | 1.0854 | 4.317    | 0.035  | 0.294   | 0.002   | 0.79029  | 1696.2 | 6.7 | 1661.2 | 9.9  | 1734.8 | 6   | 1734.8 | 6    | 4.242564 |
| 13MARAP0S1_37.FIN2 | 363   | 0.9595 | 0.5624   | 0.0061 | 0.07276 | 0.00044 | 0.4951   | 452.9  | 3.9 | 452.8  | 2.6  | 457    | 13  | 452.8  | 2.6  | 0.02208  |
| 13MARAP0S1_38.FIN2 | 534   | 0.5625 | 3.092    | 0.036  | 0.2443  | 0.003   | 0.91466  | 1430.2 | 8.9 | 1409   | 16   | 1470.3 | 8   | 1470.3 | 8    | 4.169217 |
| 13MARAP0S1_39.FIN2 | 59.8  | 0.7989 | 1.676    | 0.021  | 0.163   | 0.0015  | 0.80941  | 1000   | 7.7 | 973.1  | 8.3  | 1065   | 18  | 973.1  | 8.3  | 2.69     |
| 13MARAP0S1_40.FIN2 | 87    | 1.928  | 6.8      | 0.12   | 0.3859  | 0.0059  | 0.95129  | 2084   | 15  | 2108   | 29   | 2070.9 | 8.5 | 2070.9 | 8.5  | 1.791492 |
| 13MARAP0S1_41.FIN2 | 264   | 1.156  | 0.5353   | 0.0086 | 0.0705  | 0.001   | 0.8757   | 435.9  | 5.5 | 438.9  | 6.3  | 441    | 13  | 438.9  | 6.3  | 0.688231 |
| 13MARAP0S1_42.FIN2 | 46.5  | 1.187  | 3.344    | 0.037  | 0.2601  | 0.0031  | 0.92283  | 1490.6 | 8.5 | 1490   | 16   | 1499   | 13  | 1499   | 13   | 0.6004   |
| 13MARAP0S1_43.FIN2 | 193.1 | 0.905  | 0.1059   | 0.0031 | 0.01623 | 0.00024 | 0.91651  | 102.1  | 2.8 | 103.8  | 1.5  | 177    | 29  | 103.8  | 1.5  | 1.665034 |
| 13MARAP0S1_44.FIN2 | 220   | 1.364  | 0.105    | 0.0022 | 0.01581 | 0.00017 | 0.80961  | 101.4  | 2   | 101.1  | 1.1  | 204    | 31  | 101.1  | 1.1  | 0.295858 |
| 13MARAP0S1_45.FIN2 | 70.8  | 1.041  | 5.824    | 0.038  | 0.3651  | 0.0026  | 0.88942  | 1949.8 | 5.7 | 2008   | 12   | 1899.5 | 6.6 | 1899.5 | 6.6  | 5.712029 |
| 13MARAP0S1_46.FIN2 | 937   | 3.51   | 0.1045   | 0.0014 | 0.01588 | 0.0002  | 0.69542  | 100.9  | 1.3 | 101.6  | 1.3  | 128    | 18  | 101.6  | 1.3  | 0.693756 |
| 13MARAP0S1_47.FIN2 | 439   | 4.72   | 5.863    | 0.037  | 0.3664  | 0.0027  | 0.84559  | 1955.7 | 5.4 | 2012   | 13   | 1911.6 | 4.7 | 1911.6 | 4.7  | 5.252145 |
| 13MARAP0S1_48.FIN2 | 151.5 | 0.6164 | 1.928    | 0.015  | 0.189   | 0.0013  | 0.72819  | 1090.7 | 5.3 | 1116   | 7.1  | 1048.9 | 9.7 | 1116   | 7.1  | 2.319611 |
| 13MARAP0S1_49.FIN2 | 211   | 1.41   | 0.1055   | 0.0026 | 0.01606 | 0.0002  | 0.77573  | 101.8  | 2.4 | 102.7  | 1.3  | 177    | 31  | 102.7  | 1.3  | 0.884086 |
| 13MARAP0S1_50.FIN2 | 93.5  | 1.241  | 6.801    | 0.052  | 0.3867  | 0.0028  | 0.85297  | 2085.5 | 6.8 | 2107   | 13   | 2067.1 | 7.5 | 2067.1 | 7.5  | 1.93024  |
| 13MARAP0S1_51.FIN2 | 770   | 1.079  | 0.1721   | 0.0039 | 0.02577 | 0.00046 | 0.90283  | 161.2  | 3.4 | 164    | 2.9  | 166    | 25  | 164    | 2.9  | 1.736973 |
| 13MARAP0S1_52.FIN2 | 327.6 | 1.636  | 0.0976   | 0.0024 | 0.01467 | 0.00019 | 0.84404  | 94.5   | 2.2 | 93.9   | 1.2  | 156    | 23  | 93.9   | 1.2  | 0.634921 |
| 13MARAP0S1_53.FIN2 | 232   | 1.554  | 0.1119   | 0.0038 | 0.01695 | 0.00031 | 0.87485  | 108.1  | 3.4 | 108.3  | 2    | 225    | 42  | 108.3  | 2    | 0.185014 |
| 13MARAP0S1_54.FIN2 | 1250  | 5.8    | 0.0797   | 0.0019 | 0.01163 | 0.00027 | 0.96375  | 77.9   | 1.8 | 74.5   | 1.7  | 221    | 26  | 74.5   | 1.7  | 4.36457  |
| 13MARAP0S1_55.FIN2 | 98.9  | 0.97   | 4.531    | 0.048  | 0.3131  | 0.0031  | 0.91341  | 1735.9 | 8.9 | 1758   | 16   | 1733   | 11  | 1733   | 11   | 1.442585 |
| 13MARAP0S1_56.FIN2 | 159   | 1.819  | 0.3019   | 0.0099 | 0.04443 | 0.00069 | 0.8871   | 267.3  | 7.7 | 280.8  | 4.4  | 289    | 37  | 280.8  | 4.4  | 5.050505 |
| 13MARAP0S1_57.FIN2 | 112.9 | 1.601  | 0.0867   | 0.0042 | 0.0129  | 0.00031 | 0.9712   | 84.3   | 3.9 | 82.6   | 2    | 368    | 67  | 82.6   | 2    | 2.016607 |
| 13MARAP0S1_58.FIN2 | 12.8  | 0.633  | 2.824    | 0.079  | 0.1921  | 0.0047  | 0.99133  | 1361   | 20  | 1132   | 25   | 1794   | 46  | 1132   | 25   | 16.82586 |
| 13MARAP0S1_64.FIN2 | 194   | 1.89   | 0.1015   | 0.0022 | 0.0149  | 0.00018 | 0.044991 | 98.2   | 2.1 | 95.4   | 1.1  | 205    | 30  | 95.4   | 1.1  | 2.851324 |
| 13MARAP0S1_65.FIN2 | 170   | 3.11   | 4.281    | 0.039  | 0.2948  | 0.0025  | 0.73309  | 1689.2 | 7.4 | 1667   | 12   | 1714.3 | 6.6 | 1714.3 | 6.6  | 2.759144 |
| 13MARAP0S1_66.FIN2 | 500   | 5.12   | 0.777    | 0.013  | 0.0929  | 0.0024  | 0.6354   | 583.5  | 7.7 | 573    | 14   | 642    | 17  | 573    | 14   | 1.799486 |
| 13MARAP0S1_67.FIN2 | 254.6 | 0.901  | 4.399    | 0.033  | 0.3019  | 0.0024  | 0.71006  | 1711.9 | 6.2 | 1701   | 12   | 1721.1 | 6.7 | 1721.1 | 6.7  | 1.167858 |
| 13MARAP0S1_68.FIN2 | 132.6 | 1.65   | 4.496    | 0.03   | 0.3064  | 0.002   | 0.62572  | 1730.7 | 5.4 | 1723   | 10   | 1731.2 | 6.1 | 1731.2 | 6.1  | 0.47366  |
| 13MARAP0S1_69.FIN2 | 33    | 0.888  | 6.588    | 0.072  | 0.3667  | 0.0044  | 0.53116  | 2058.3 | 9.4 | 2013   | 21   | 2098   | 12  | 2098   | 12   | 4.051478 |
| 13MARAP0S1_70.FIN2 | 94.02 | 1.619  | 1.736    | 0.019  | 0.1678  | 0.0012  | 0.13807  | 1021.6 | 6.9 | 1000   | 6.7  | 1065   | 13  | 1000   | 6.7  | 2.114332 |
| 13MARAP0S1_71.FIN2 | 665   | 1.006  | 0.0929</ |        |         |         |          |        |     |        |      |        |     |        |      |          |

|                     |       |        |        |        |         |         |          |        |     |        |      |        |     |        |      |          |
|---------------------|-------|--------|--------|--------|---------|---------|----------|--------|-----|--------|------|--------|-----|--------|------|----------|
| 13MARAPOS1_87.FIN2  | 895   | 2.82   | 0.1007 | 0.0011 | 0.01529 | 0.00014 | 0.21016  | 97.4   | 1   | 97.84  | 0.88 | 107    | 15  | 97.84  | 0.88 | 0.451745 |
| 13MARAPOS1_88.FIN2  | 277   | 0.998  | 0.1346 | 0.0076 | 0.01602 | 0.00024 | 0.51091  | 127.8  | 6.7 | 102.5  | 1.5  | 646    | 96  | 102.5  | 1.5  | 19.79656 |
| 13MARAPOS1_89.FIN2  | 152   | 0.9    | 5.608  | 0.064  | 0.3456  | 0.0037  | 0.85179  | 1917.8 | 9.7 | 1913   | 18   | 1926.9 | 5.6 | 1926.9 | 5.6  | 0.721366 |
| 13MARAPOS1_90.FIN2  | 73.6  | 1.26   | 2.967  | 0.028  | 0.2376  | 0.0019  | 0.45849  | 1399.7 | 7   | 1373.8 | 9.9  | 1432   | 10  | 1432   | 10   | 4.064246 |
| 13MARAPOS1_91.FIN2  | 509   | 1.915  | 0.0981 | 0.0021 | 0.01496 | 0.00016 | 0.32657  | 95     | 1.9 | 95.7   | 1    | 113    | 19  | 95.7   | 1    | 0.736842 |
| 13MARAPOS1_92.FIN2  | 374.6 | 1.215  | 0.0945 | 0.0015 | 0.01439 | 0.00017 | 0.08887  | 91.7   | 1.4 | 92.1   | 1.1  | 125    | 19  | 92.1   | 1.1  | 0.436205 |
| 13MARAPOS1_93.FIN2  | 74.6  | 2.432  | 0.821  | 0.013  | 0.0999  | 0.001   | 0.38513  | 608.4  | 7   | 614    | 5.9  | 596    | 21  | 614    | 5.9  | 0.920447 |
| 13MARAPOS1_94.FIN2  | 145.4 | 1.007  | 5.338  | 0.039  | 0.3375  | 0.0023  | 0.67448  | 1874.5 | 6.3 | 1874   | 11   | 1876.3 | 5   | 1876.3 | 5    | 0.122582 |
| 13MARAPOS1_95.FIN2  | 370.9 | 2.421  | 4.245  | 0.059  | 0.2812  | 0.0037  | 0.76743  | 1682   | 11  | 1600   | 19   | 1792.8 | 9.3 | 1792.8 | 9.3  | 10.75413 |
| 13MARAPOS1_96.FIN2  | 254   | 1.155  | 0.0975 | 0.0025 | 0.0145  | 0.0002  | 0.29714  | 94.4   | 2.3 | 92.8   | 1.3  | 192    | 24  | 92.8   | 1.3  | 1.694915 |
| 13MARAPOS1_97.FIN2  | 662   | 1.002  | 0.0972 | 0.0015 | 0.01446 | 0.00017 | 0.31374  | 94.2   | 1.4 | 92.6   | 1.1  | 158    | 16  | 92.6   | 1.1  | 1.698514 |
| 13MARAPOS1_98.FIN2  | 53.3  | 0.946  | 6.342  | 0.055  | 0.3671  | 0.0028  | 0.36565  | 2024.9 | 7.5 | 2015   | 13   | 2031.9 | 9.2 | 2031.9 | 9.2  | 0.831734 |
| 13MARAPOS1_99.FIN2  | 126.1 | 0.816  | 4.323  | 0.033  | 0.3051  | 0.0027  | 0.55707  | 1697.5 | 6.3 | 1716   | 14   | 1687.4 | 9.1 | 1687.4 | 9.1  | 1.694915 |
| 13MARAPOS1_100.FIN2 | 177.6 | 0.891  | 0.5087 | 0.0074 | 0.06665 | 0.00063 | 0.43062  | 417.3  | 5   | 415.9  | 3.8  | 444    | 18  | 415.9  | 3.8  | 0.33549  |
| 13MARAPOS1_101.FIN2 | 274   | 2.81   | 4.49   | 0.11   | 0.3027  | 0.0069  | 0.98033  | 1727   | 20  | 1704   | 34   | 1762   | 4.8 | 1762   | 4.8  | 3.291714 |
| 13MARAPOS1_102.FIN2 | 176.5 | 0.798  | 3.394  | 0.021  | 0.26    | 0.0015  | 0.47633  | 1502.9 | 4.9 | 1489.7 | 7.8  | 1534.6 | 8.1 | 1534.6 | 8.1  | 2.925844 |
| 13MARAPOS1_103.FIN2 | 439   | 2.119  | 0.099  | 0.0017 | 0.01514 | 0.00016 | 0.33218  | 95.9   | 1.6 | 96.8   | 1    | 110    | 20  | 96.8   | 1    | 0.938478 |
| 13MARAPOS1_104.FIN2 | 1187  | 2.139  | 0.0942 | 0.0011 | 0.01427 | 0.00012 | 0.32958  | 91.4   | 1.1 | 91.34  | 0.79 | 108    | 13  | 91.34  | 0.79 | 0.065646 |
| 13MARAPOS1_105.FIN2 | 119.8 | 1.026  | 4.874  | 0.041  | 0.3158  | 0.0022  | 0.21175  | 1797.5 | 7   | 1769   | 11   | 1849   | 11  | 1849   | 11   | 4.326663 |
| 13MARAPOS1_106.FIN2 | 162   | 1.7    | 0.0977 | 0.0036 | 0.01481 | 0.00023 | 0.087192 | 94.5   | 3.3 | 94.8   | 1.5  | 219    | 46  | 94.8   | 1.5  | 0.31746  |
| 13MARAPOS1_107.FIN2 | 248   | 1.36   | 0.0967 | 0.0023 | 0.01491 | 0.00016 | 0.31976  | 93.7   | 2.1 | 95.4   | 1    | 154    | 25  | 95.4   | 1    | 1.814301 |
| 13MARAPOS1_108.FIN2 | 133.6 | 1.138  | 0.1012 | 0.0048 | 0.01428 | 0.00035 | 0.18525  | 97.8   | 4.5 | 91.4   | 2.2  | 341    | 83  | 91.4   | 2.2  | 6.543967 |
| 13MARAPOS1_109.FIN2 | 101.8 | 1.517  | 4.624  | 0.048  | 0.3064  | 0.003   | 0.58113  | 1753.1 | 8.7 | 1723   | 15   | 1782.3 | 7.6 | 1782.3 | 7.6  | 3.327162 |
| 13MARAPOS1_110.FIN2 | 252.6 | 1.11   | 0.0961 | 0.002  | 0.01463 | 0.00022 | 0.038404 | 93.2   | 1.8 | 93.6   | 1.4  | 185    | 32  | 93.6   | 1.4  | 0.429185 |
| 13MARAPOS1_111.FIN2 | 524   | 0.826  | 0.0838 | 0.0013 | 0.01204 | 0.00012 | 0.25653  | 81.7   | 1.2 | 77.18  | 0.79 | 130    | 19  | 77.18  | 0.79 | 5.532436 |
| 13MARAPOS1_112.FIN2 | 345.1 | 1.1395 | 5.077  | 0.03   | 0.3271  | 0.0025  | 0.34599  | 1832.2 | 5.1 | 1824   | 12   | 1851   | 8   | 1851   | 8    | 1.458671 |
| 13MARAPOS1_113.FIN2 | 97.6  | 0.5286 | 0.0684 | 0.0029 | 0.00996 | 0.00022 | 0.033912 | 67.1   | 2.8 | 63.9   | 1.4  | 215    | 34  | 63.9   | 1.4  | 4.769001 |
| 13MARAPOS1_114.FIN2 | 296   | 1.172  | 0.1014 | 0.0023 | 0.01479 | 0.00018 | 0.16355  | 98.1   | 2.1 | 94.6   | 1.1  | 208    | 32  | 94.6   | 1.1  | 3.567788 |
| 13MARAPOS1_115.FIN2 | 169   | 1.308  | 5.373  | 0.048  | 0.3412  | 0.0034  | 0.74995  | 1880.2 | 7.7 | 1892   | 16   | 1866.1 | 9   | 1866.1 | 9    | 1.387921 |
| 13MARAPOS1_116.FIN2 | 168.7 | 3.96   | 3.794  | 0.035  | 0.2792  | 0.0027  | 0.78274  | 1591.9 | 7.5 | 1587   | 14   | 1597.3 | 6.8 | 1597.3 | 6.8  | 0.644838 |
| 13MARAPOS1_117.FIN2 | 45.6  | 0.4996 | 6.33   | 0.12   | 0.3604  | 0.0056  | 0.71227  | 2022   | 17  | 1983   | 27   | 2078   | 17  | 2078   | 17   | 4.571704 |
| 13MARAPOS1_118.FIN2 | 146.6 | 1.249  | 4.372  | 0.036  | 0.305   | 0.0027  | 0.5505   | 1706.7 | 6.7 | 1716   | 13   | 1708.4 | 7.7 | 1708.4 | 7.7  | 0.444861 |
| 13MARAPOS1_119.FIN2 | 482   | 1.509  | 2.067  | 0.022  | 0.1917  | 0.0019  | 0.68153  | 1139.8 | 6.8 | 1130   | 10   | 1152.2 | 9.6 | 1130   | 10   | 0.8598   |
| 13MARAPOS1_120.FIN2 | 159.5 | 0.9962 | 4.623  | 0.028  | 0.3154  | 0.0022  | 0.51129  | 1753.2 | 5   | 1767   | 11   | 1740.5 | 6   | 1740.5 | 6    | 1.522551 |
| 13MARAPOS1_121.FIN2 | 81    | 1.64   | 2.084  | 0.022  | 0.1936  | 0.0021  | 0.48662  | 1144.2 | 7.4 | 1140   | 11   | 1156   | 10  | 1140   | 11   | 0.367069 |

---

|                |       |        |        |        |         |         |          |        |     |        |      |        |     |        |      |          |
|----------------|-------|--------|--------|--------|---------|---------|----------|--------|-----|--------|------|--------|-----|--------|------|----------|
| 13MEEI_1.FIN2  | 86.9  | 1.213  | 2.232  | 0.032  | 0.2063  | 0.0025  | 0.56478  | 1191   | 10  | 1209   | 13   | 1165   | 12  | 1165   | 13   | 1.511335 |
| 13MEEI_2.FIN2  | 185.1 | 1.08   | 0.918  | 0.009  | 0.10719 | 0.00096 | 0.37406  | 661.8  | 4.9 | 656.4  | 5.6  | 684    | 12  | 656.4  | 5.6  | 0.815956 |
| 13MEEI_3.FIN2  | 141.3 | 1.41   | 2.725  | 0.026  | 0.2132  | 0.0026  | 0.83833  | 1334.9 | 7.2 | 1246   | 14   | 1471   | 10  | 1471   | 10   | 15.29572 |
| 13MEEI_4.FIN2  | 184.7 | 2.03   | 13.97  | 0.14   | 0.545   | 0.0043  | 0.63216  | 2746.8 | 9.8 | 2804   | 18   | 2700   | 11  | 2700   | 11   | 3.851852 |
| 13MEEI_5.FIN2  | 147.6 | 0.913  | 0.0913 | 0.0025 | 0.01367 | 0.0002  | 0.080263 | 88.7   | 2.3 | 87.5   | 1.3  | 185    | 29  | 87.5   | 1.3  | 1.325275 |
| 13MEEI_6.FIN2  | 517   | 0.884  | 0.114  | 0.0012 | 0.01658 | 0.00013 | 0.13225  | 109.6  | 1.1 | 106.02 | 0.81 | 191    | 16  | 106.02 | 0.81 | 3.266423 |
| 13MEEI_7.FIN2  | 660   | 1.228  | 0.1097 | 0.0027 | 0.01508 | 0.0002  | 0.67462  | 105.7  | 2.5 | 96.5   | 1.3  | 314    | 49  | 96.5   | 1.3  | 8.703879 |
| 13MEEI_8.FIN2  | 179   | 0.779  | 0.1879 | 0.0063 | 0.02589 | 0.0003  | 0.31922  | 174.6  | 5.3 | 164.8  | 1.9  | 293    | 50  | 164.8  | 1.9  | 5.612829 |
| 13MEEI_9.FIN2  | 292   | 1.474  | 4.914  | 0.031  | 0.3249  | 0.0026  | 0.69385  | 1804.3 | 5.4 | 1813   | 12   | 1791   | 6.5 | 1791   | 6.5  | 1.228364 |
| 13MEEI_10.FIN2 | 139.9 | 1.178  | 0.0934 | 0.0029 | 0.0136  | 0.0002  | 0.012775 | 90.6   | 2.7 | 87.1   | 1.3  | 201    | 34  | 87.1   | 1.3  | 3.863135 |
| 13MEEI_12.FIN2 | 114   | 1.082  | 4.63   | 0.049  | 0.3201  | 0.0038  | 0.51355  | 1754   | 8.9 | 1792   | 18   | 1707   | 10  | 1707   | 10   | 4.979496 |
| 13MEEI_13.FIN2 | 54.1  | 1.065  | 2.069  | 0.024  | 0.194   | 0.0019  | 0.092656 | 1138.1 | 7.9 | 1143   | 10   | 1124   | 13  | 1143   | 10   | 0.430542 |
| 13MEEI_14.FIN2 | 226.9 | 0.939  | 0.1768 | 0.0038 | 0.02506 | 0.00026 | 0.16414  | 165.2  | 3.3 | 159.6  | 1.7  | 250    | 31  | 159.6  | 1.7  | 3.389831 |
| 13MEEI_15.FIN2 | 36.5  | 0.6431 | 5.582  | 0.051  | 0.3467  | 0.0037  | 0.58798  | 1912.7 | 7.9 | 1921   | 18   | 1903   | 9.3 | 1903   | 9.3  | 0.945875 |
| 13MEEI_16.FIN2 | 507   | 1.279  | 0.174  | 0.0023 | 0.0258  | 0.0002  | 0.1927   | 162.8  | 2   | 164.2  | 1.3  | 142    | 16  | 164.2  | 1.3  | 0.859951 |
| 13MEEI_17.FIN2 | 182.1 | 1.0443 | 0.0905 | 0.0026 | 0.01359 | 0.00022 | 0.060389 | 87.9   | 2.4 | 87     | 1.4  | 193    | 32  | 87     | 1.4  | 1.023891 |
| 13MEEI_18.FIN2 | 308.3 | 2.17   | 6.83   | 0.16   | 0.3572  | 0.0057  | 0.83942  | 2087   | 21  | 1968   | 27   | 2212   | 17  | 2212   | 17   | 11.03074 |
| 13MEEI_19.FIN2 | 32.6  | 0.3565 | 1.923  | 0.028  | 0.1856  | 0.0018  | 0.32742  | 1089.4 | 9.5 | 1098   | 10   | 1064   | 20  | 1098   | 10   | 0.789425 |
| 13MEEI_20.FIN2 | 87.4  | 0.929  | 0.094  | 0.0037 | 0.01345 | 0.00025 | 0.3909   | 91.1   | 3.5 | 86.1   | 1.6  | 328    | 48  | 86.1   | 1.6  | 5.488474 |
| 13MEEI_21.FIN2 | 91.5  | 0.958  | 0.883  | 0.012  | 0.104   | 0.0011  | 0.28559  | 642.3  | 6.5 | 637.7  | 6.3  | 651    | 17  | 637.7  | 6.3  | 0.716176 |
| 13MEEI_22.FIN2 | 109   | 1.18   | 0.5005 | 0.0099 | 0.06579 | 0.00083 | 0.31436  | 411.8  | 6.7 | 410.7  | 5    | 432    | 32  | 410.7  | 5    | 0.26712  |
| 13MEEI_23.FIN2 | 307   | 5.52   | 1.95   | 0.019  | 0.1894  | 0.0019  | 0.69205  | 1098.9 | 6.6 | 1118   | 10   | 1050.8 | 8.1 | 1118   | 10   | 1.738102 |
| 13MEEI_24.FIN2 | 120.5 | 1.142  | 0.1312 | 0.005  | 0.01564 | 0.00025 | 0.040145 | 125    | 4.4 | 100    | 1.6  | 618    | 73  | 100    | 1.6  | 20       |
| 13MEEI_25.FIN2 | 235.7 | 2.794  | 1.786  | 0.016  | 0.175   | 0.0015  | 0.69513  | 1040.1 | 5.7 | 1039.7 | 8.2  | 1038.8 | 7.7 | 1039.7 | 8.2  | 0.038458 |
| 13MEEI_26.FIN2 | 272   | 1.198  | 0.1053 | 0.0016 | 0.01579 | 0.00018 | 0.2168   | 101.7  | 1.4 | 101    | 1.1  | 148    | 22  | 101    | 1.1  | 0.688299 |
| 13MEEI_27.FIN2 | 237   | 1.048  | 0.1    | 0.0025 | 0.01513 | 0.00018 | 0.038656 | 96.7   | 2.3 | 96.8   | 1.1  | 184    | 45  | 96.8   | 1.1  | 0.103413 |
| 13MEEI_28.FIN2 | 144.6 | 0.9    | 0.1988 | 0.0044 | 0.02861 | 0.00037 | 0.055961 | 184    | 3.7 | 181.8  | 2.3  | 244    | 30  | 181.8  | 2.3  | 1.195652 |
| 13MEEI_29.FIN2 | 76.2  | 1.582  | 2.046  | 0.023  | 0.1876  | 0.0018  | 0.58581  | 1130.4 | 7.7 | 1108.1 | 9.8  | 1157   | 11  | 1108.1 | 9.8  | 1.972753 |
| 13MEEI_30.FIN2 | 105.1 | 1.667  | 4.413  | 0.034  | 0.3131  | 0.0032  | 0.60179  | 1714.5 | 6.4 | 1756   | 16   | 1660.5 | 8.1 | 1660.5 | 8.1  | 5.75128  |
| 13MEEI_31.FIN2 | 68.7  | 1.316  | 0.133  | 0.022  | 0.01524 | 0.00064 | 0.068682 | 126    | 18  | 97.5   | 4.1  | 980    | 220 | 97.5   | 4.1  | 22.61905 |
| 13MEEI_31.FIN2 | 718   | 10.1   | 3.991  | 0.085  | 0.2845  | 0.0053  | 0.96391  | 1631   | 17  | 1613   | 27   | 1652   | 8.9 | 1652   | 8.9  | 2.360775 |
| 13MEEI_32.FIN2 | 203   | 1.155  | 0.1852 | 0.0026 | 0.02738 | 0.00028 | 0.13218  | 172.5  | 2.2 | 174.1  | 1.8  | 142    | 21  | 174.1  | 1.8  | 0.927536 |
| 13MEEI_33.FIN2 | 183   | 1.694  | 0.0981 | 0.0025 | 0.01467 | 0.00017 | 0.065699 | 94.9   | 2.3 | 93.9   | 1.1  | 179    | 42  | 93.9   | 1.1  | 1.053741 |
| 13MEEI_34.FIN2 | 37.5  | 0.5197 | 1.903  | 0.024  | 0.1868  | 0.0016  | 0.25599  | 1081.7 | 8.4 | 1104   | 8.9  | 1037   | 16  | 1104   | 8.9  | 2.06157  |
| 13MEEI_35.FIN2 | 629   | 6.429  | 0.646  | 0.016  | 0.0696  | 0.0012  | 0.11562  | 504.9  | 9.4 | 434.5  | 7.2  | 836    | 56  | 434.5  | 7.2  | 13.94336 |

|                 |       |        |        |        |         |         |          |        |     |        |      |        |     |        |      |           |
|-----------------|-------|--------|--------|--------|---------|---------|----------|--------|-----|--------|------|--------|-----|--------|------|-----------|
| 13MEEI_57.FIN2  | 213   | 1.43   | 5.226  | 0.043  | 0.3504  | 0.0032  | 0.79542  | 1857.3 | 7.2 | 1936   | 15   | 1766.7 | 5.9 | 1766.7 | 5.9  | 9.582838  |
| 13MEEI_59.FIN2  | 222.4 | 1.45   | 0.1005 | 0.0021 | 0.01518 | 0.00017 | 0.012935 | 97.2   | 1.9 | 97.1   | 1.1  | 165    | 22  | 97.1   | 1.1  | 0.102881  |
| 13MEEI_60.FIN2  | 431   | 1.738  | 2.477  | 0.026  | 0.2089  | 0.0021  | 0.83791  | 1265   | 7.6 | 1223   | 11   | 1344.7 | 5.3 | 1344.7 | 5.3  | 9.050346  |
| 13MEEI_61.FIN2  | 147   | 1.133  | 0.1009 | 0.0027 | 0.01419 | 0.00021 | 0.022935 | 97.6   | 2.5 | 90.8   | 1.3  | 311    | 33  | 90.8   | 1.3  | 6.967213  |
| 13MEEI_62.FIN2  | 246   | 1.263  | 0.1076 | 0.0017 | 0.01607 | 0.00019 | 0.028769 | 103.7  | 1.6 | 102.7  | 1.2  | 168    | 25  | 102.7  | 1.2  | 0.96432   |
| 13MEEI_63.FIN2  | 115.8 | 1.751  | 4.881  | 0.033  | 0.3299  | 0.0021  | 0.66111  | 1799.4 | 5.5 | 1838   | 10   | 1747.2 | 6   | 1747.2 | 6    | 5.196886  |
| 13MEEI_64.FIN2  | 90.3  | 1.264  | 2.025  | 0.018  | 0.1933  | 0.0013  | 0.46577  | 1124.4 | 6.3 | 1139.2 | 7.3  | 1094.9 | 7.8 | 1139.2 | 7.3  | 1.316258  |
| 13MEEI_65.FIN2  | 95.9  | 1.323  | 2.061  | 0.028  | 0.1952  | 0.0035  | 0.63236  | 1135.8 | 9.2 | 1153   | 18   | 1098   | 15  | 1153   | 18   | 1.514351  |
| 13MEEI_66.FIN2  | 110.9 | 2.035  | 1.88   | 0.017  | 0.1841  | 0.0015  | 0.42057  | 1074.6 | 5.7 | 1089.2 | 8.1  | 1032   | 12  | 1089.2 | 8.1  | 1.358645  |
| 13MEEI_67.FIN2  | 233.2 | 1.024  | 0.5157 | 0.0045 | 0.0684  | 0.00058 | 0.2971   | 422.2  | 3   | 426.5  | 3.5  | 396    | 11  | 426.5  | 3.5  | 0.108475  |
| 13MEEI_68.FIN2  | 263   | 2.39   | 0.6814 | 0.008  | 0.08493 | 0.00076 | 0.33875  | 527.4  | 4.8 | 525.4  | 4.5  | 547    | 14  | 525.4  | 4.5  | 0.379219  |
| 13MEEI_69.FIN2  | 170   | 2.312  | 5      | 0.035  | 0.3484  | 0.0031  | 0.66574  | 1820.2 | 5.6 | 1927   | 15   | 1695.2 | 5.9 | 1695.2 | 5.9  | 13.6739   |
| 13MEEI_70.FIN2  | 51.2  | 0.8571 | 5.582  | 0.046  | 0.3607  | 0.0026  | 0.56395  | 1912.8 | 7.2 | 1985   | 13   | 1832.7 | 7.5 | 1832.7 | 7.5  | 8.310144  |
| 13MEEI_71.FIN2  | 228.7 | 0.9756 | 4.438  | 0.021  | 0.3173  | 0.0017  | 0.63605  | 1719.9 | 4   | 1776.5 | 8.3  | 1652.6 | 4.6 | 1652.6 | 4.6  | 7.497277  |
| 13MEEI_72.FIN2  | 2430  | 1.673  | 0.1791 | 0.0036 | 0.01318 | 0.00071 | 0.22574  | 167.2  | 3.1 | 84.4   | 4.5  | 1650   | 120 | DISC   | DISC | 94.88485  |
| 13MEEI_73.FIN2  | 81.2  | 2.28   | 2.749  | 0.075  | 0.2157  | 0.0055  | 0.93732  | 1339   | 20  | 1258   | 29   | 1464.9 | 9.8 | 1464.9 | 9.8  | 14.12383  |
| 13MEEI_74.FIN2  | 315   | 1.463  | 0.1204 | 0.0019 | 0.01718 | 0.00019 | 0.16326  | 115.4  | 1.7 | 109.8  | 1.2  | 226    | 23  | 109.8  | 1.2  | 4.852686  |
| 13MEEI_75.FIN2  | 4.587 | 0.474  | 6.23   | 0.18   | 0.0739  | 0.0026  | 0.23916  | 2010   | 26  | 459    | 16   | 4556   | 32  | DISC   | DISC | 89.92537  |
| 13MEEI_76.FIN2  | 128.1 | 2.047  | 3.811  | 0.032  | 0.2712  | 0.0022  | 0.80039  | 1594.6 | 6.7 | 1547   | 11   | 1663.6 | 4.9 | 1663.6 | 4.9  | 7.008896  |
| 13MEEI_77.FIN2  | 61.7  | 0.607  | 3.503  | 0.032  | 0.2746  | 0.0024  | 0.44739  | 1527.3 | 7.1 | 1564   | 12   | 1493   | 11  | 1493   | 11   | 4.755526  |
| 13MEEI_78.FIN2  | 104.5 | 0.905  | 0.1064 | 0.0054 | 0.01453 | 0.00028 | 0.14865  | 102.4  | 4.9 | 93.2   | 1.8  | 441    | 70  | 93.2   | 1.8  | 8.984375  |
| 13MEEI_79.FIN2  | 81    | 0.575  | 2.867  | 0.028  | 0.237   | 0.002   | 0.41838  | 1372.8 | 7.4 | 1371   | 11   | 1378.7 | 9.7 | 1378.7 | 9.7  | 0.558497  |
| 13MEEI_80.FIN2  | 97.2  | 0.983  | 2.693  | 0.022  | 0.2286  | 0.0018  | 0.61716  | 1326.2 | 6.1 | 1326.9 | 9.4  | 1326.3 | 8.2 | 1326.3 | 8.2  | 0.045239  |
| 13MEEI_81.FIN2  | 93.7  | 0.584  | 0.097  | 0.0054 | 0.01394 | 0.00031 | 0.33869  | 93.8   | 4.9 | 89.2   | 2    | 380    | 110 | 89.2   | 2    | 4.904051  |
| 13MEEI_82.FIN2  | 700   | 0.832  | 0.1086 | 0.0021 | 0.01635 | 0.00023 | 0.54856  | 104.7  | 1.9 | 104.6  | 1.5  | 119    | 21  | 104.6  | 1.5  | 0.095511  |
| 13MEEI_83.FIN2  | 315.9 | 1.394  | 0.0958 | 0.0016 | 0.01432 | 0.00018 | 0.20945  | 92.9   | 1.5 | 91.7   | 1.1  | 136    | 21  | 91.7   | 1.1  | 1.291712  |
| 13MEEI_84.FIN2  | 426   | 2.479  | 0.152  | 0.051  | 0.01601 | 0.00025 | 0.22646  | 141    | 40  | 102.4  | 1.6  | 1110   | 380 | 102.4  | 1.6  | 27.37589  |
| 13MEEI_85.FIN2  | 138.3 | 1.246  | 0.0992 | 0.0031 | 0.01502 | 0.00022 | 0.15684  | 96.5   | 2.7 | 96.1   | 1.4  | 201    | 35  | 96.1   | 1.4  | 0.414508  |
| 13MEEI_86.FIN2  | 112.8 | 0.945  | 4.314  | 0.031  | 0.3035  | 0.0028  | 0.82643  | 1695.8 | 6   | 1709   | 14   | 1674.3 | 6.2 | 1674.3 | 6.2  | 0.2702508 |
| 13MEEI_87.FIN2  | 40.4  | 0.995  | 5.11   | 0.04   | 0.3366  | 0.0027  | 0.6103   | 1837.4 | 6.6 | 1870   | 13   | 1802.9 | 7.2 | 1802.9 | 7.2  | 3.721782  |
| 13MEEI_88.FIN2  | 38.5  | 0.8287 | 2.293  | 0.028  | 0.2099  | 0.0026  | 0.4706   | 1209.5 | 8.7 | 1228   | 14   | 1175   | 13  | 1175   | 14   | 1.529558  |
| 13MEEI_90.FIN2  | 139.5 | 1.175  | 4.806  | 0.043  | 0.3206  | 0.0019  | 0.43767  | 1785.4 | 7.5 | 1792.5 | 9.3  | 1780   | 12  | 1780   | 12   | 0.702247  |
| 13MEEI_91.FIN2  | 150   | 3.2    | 0.5287 | 0.0078 | 0.07003 | 0.00062 | 0.17463  | 430.7  | 5.2 | 436.8  | 3.7  | 396    | 22  | 436.8  | 3.7  | 1.416299  |
| 13MEEI_92.FIN2  | 108.4 | 1.179  | 5.072  | 0.036  | 0.3367  | 0.0031  | 0.80199  | 1831.1 | 6.1 | 1871   | 15   | 1787   | 6.2 | 1787   | 6.2  | 4.700616  |
| 13MEEI_93.FIN2  | 125.7 | 1.692  | 2.794  | 0.018  | 0.2426  | 0.0017  | 0.5727   | 1353.6 | 4.7 | 1399.9 | 8.6  | 1283.2 | 8.3 | 1283.2 | 8.3  | 9.094451  |
| 13MEEI_94.FIN2  | 134.7 | 1.657  | 3.546  | 0.028  | 0.2759  | 0.0019  | 0.51197  | 1538.7 | 6.1 | 1570.4 | 9.7  | 1495.7 | 8.1 | 1495.7 | 8.1  | 4.994317  |
| 13MEEI_95.FIN2  | 536   | 1.222  | 0.0952 | 0.0011 | 0.0141  | 0.00014 | 0.15771  | 92.4   | 1   | 90.28  | 0.92 | 148    | 19  | 90.28  | 0.92 | 2.294372  |
| 13MEEI_96.FIN2  | 449   | 1.082  | 0.1433 | 0.0058 | 0.01614 | 0.00026 | 0.089252 | 135.9  | 5.1 | 103.2  | 1.7  | 735    | 71  | 103.2  | 1.7  | 24.06181  |
| 13MEEI_97.FIN2  | 896   | 4.07   | 0.4075 | 0.0072 | 0.04409 | 0.00073 | 0.76306  | 347.6  | 5.3 | 278.1  | 4.5  | 813    | 27  | 278.1  | 4.5  | 19.99425  |
| 13MEEI_98.FIN2  | 174.2 | 1.316  | 6.968  | 0.076  | 0.3756  | 0.004   | 0.86394  | 2106.5 | 9.8 | 2055   | 19   | 2150.9 | 6.6 | 2150.9 | 6.6  | 4.458599  |
| 13MEEI_99.FIN2  | 196   | 0.4939 | 2.969  | 0.035  | 0.2305  | 0.0021  | 0.79327  | 1400   | 9   | 1337   | 11   | 1486   | 11  | 1486   | 11   | 10.02692  |
| 13MEEI_100.FIN2 | 249.5 | 1.702  | 3.9    | 0.071  | 0.2606  | 0.0035  | 0.85632  | 1612   | 15  | 1492   | 18   | 1773   | 15  | 1773   | 15   | 15.84884  |
| 13MEEI_101.FIN2 | 63    | 1.025  | 3.162  | 0.037  | 0.2516  | 0.0027  | 0.48475  | 1447.1 | 9   | 1446   | 14   | 1438   | 12  | 1438   | 12   | 0.556328  |
| 13MEEI_102.FIN2 | 523   | 2.552  | 4.617  | 0.04   | 0.3165  | 0.0029  | 0.85884  | 1751.9 | 7.3 | 1773   | 14   | 1734.7 | 5.4 | 1734.7 | 5.4  | 2.207875  |
| 13MEEI_103.FIN2 | 165   | 0.966  | 4.191  | 0.059  | 0.2978  | 0.0048  | 0.89884  | 1671   | 12  | 1679   | 24   | 1651.8 | 6.3 | 1651.8 | 6.3  | 1.646688  |
| 13MEEI_104.FIN2 | 68.3  | 0.558  | 11.21  | 0.13   | 0.4684  | 0.0046  | 0.88453  | 2541   | 11  | 2476   | 20   | 2594.3 | 6.5 | 2594.3 | 6.5  | 4.559997  |
| 13MEEI_105.FIN2 | 124   | 1.49   | 3.668  | 0.038  | 0.2814  | 0.0029  | 0.92941  | 1561.9 | 9.2 | 1598   | 15   | 1521.5 | 9.6 | 1521.5 | 9.6  | 5.027933  |
| 13MEEI_106.FIN2 | 32.63 | 1.08   | 4.75   | 0.14   | 0.2932  | 0.0039  | 0.68184  | 1783   | 24  | 1657   | 19   | 1926   | 32  | 1926   | 32   | 13.96677  |
| 13MEEI_107.FIN2 | 44.9  | 0.716  | 10.92  | 0.15   | 0.4343  | 0.0056  | 0.73849  | 2515   | 13  | 2325   | 25   | 2675.3 | 6.8 | 2675.3 | 6.8  | 13.09386  |
| 13MEEI_108.FIN2 | 228.1 | 0.9661 | 5.043  | 0.032  | 0.316   | 0.002   | 0.54096  | 1826.3 | 5.3 | 1770.2 | 9.8  | 1889.1 | 7.7 | 1889.1 | 7.7  | 6.294002  |
| 13MEEI_109.FIN2 | 188.4 | 0.8829 | 3.929  | 0.02   | 0.2819  | 0.0018  | 0.44876  | 1619.5 | 4.1 | 1600.8 | 9.1  | 1647.3 | 6.9 | 1647.3 | 6.9  | 2.822801  |
| 13MEEI_110.FIN2 | 75    | 1.579  | 0.1934 | 0.0046 | 0.0278  | 0.00039 | 0.025423 | 179.3  | 3.9 | 176.8  | 2.4  | 253    | 36  | 176.8  | 2.4  | 1.394311  |
| 13MEEI_111.FIN2 | 227.7 | 1.398  | 3.264  | 0.02   | 0.2629  | 0.0019  | 0.8302   | 1472.4 | 4.7 | 1504.3 | 9.6  | 1430.3 | 6.9 | 1430.3 | 6.9  | 5.17374   |
| 13MEEI_112.FIN2 | 195   | 2.74   | 2.758  | 0.024  | 0.2328  | 0.0018  | 0.66924  | 1344   | 6.4 | 1349   | 9.5  | 1337   | 10  | 1337   | 10   | 0.897532  |
| 13MEEI_113.FIN2 | 517   | 5.24   | 2.624  | 0.012  | 0.2236  | 0.0015  | 0.5956   | 1307.3 | 3.5 | 1300.8 | 7.8  | 1322.3 | 7.2 | 1322.3 | 7.2  | 1.625955  |
| 13MEEI_114.FIN2 | 557   | 42.6   | 0.518  | 0.011  | 0.0671  | 0.0016  | 0.94401  | 423.3  | 7.4 | 418.9  | 9.5  | 461    | 14  | 418.9  | 9.5  | 1.039452  |
| 13MEEI_116.FIN2 | 23.7  | 0.6882 | 6.841  | 0.088  | 0.3861  | 0.0051  | 0.69599  | 2092   | 11  | 2104   | 24   | 2068   | 10  | 2068   | 10   | 1.740812  |
| 13MEEI_117.FIN2 | 165.6 | 1.431  | 4.625  | 0.028  | 0.3229  | 0.0021  | 0.71997  | 1754.4 | 5.2 | 1804   | 10   | 1697.3 | 5.1 | 1697.3 | 5.1  | 6.286455  |
| 13MEEI_118.FIN2 | 159   | 0.863  | 1.912  | 0.033  | 0.1614  | 0.0027  | 0.9793   | 1084   | 12  | 964    | 15   | 1335   | 12  | 964    | 15   | 11.07011  |
| 13MEEI_119.FIN2 | 98.1  | 1.242  | 3.281  | 0.021  | 0.2639  | 0.0016  | 0.39939  | 1476.3 | 5   | 1509.4 | 8.4  | 1432.8 | 6.4 | 1432.8 | 6.4  | 5.346175  |
| 13MEEI_120.FIN2 | 73.5  | 8.74   | 1.573  | 0.037  | 0.135   | 0.0023  | 0.92237  | 808    | 13  | 794    | 13   | 868    | 13  | 794    | 13   | 1.732673  |

|                      |       |        |        |        |         |         |          |        |     |       |     |      |     |       |     |          |
|----------------------|-------|--------|--------|--------|---------|---------|----------|--------|-----|-------|-----|------|-----|-------|-----|----------|
| CastlegateCo_1.FIN2  | 277   | 1.53   | 0.527  | 0.0085 | 0.06887 | 0.00087 | 0.14775  | 429.5  | 5.7 | 429.3 | 5.2 | 437  | 46  | 429.3 | 5.2 | 0.046566 |
| CastlegateCO_2.FIN2  | 702   | 32     | 0.58   | 0.02   | 0.0758  | 0.0033  | 0.48678  | 464    | 13  | 471   | 19  | 504  | 84  | 471   | 19  | 1.508621 |
| CastlegateCO_2.FIN2  | 168   | 2.64   | 2.97   | 0.096  | 0.2338  | 0.0061  | 0.72895  | 1398   | 24  | 1354  | 32  | 1475 | 45  | 1475  | 45  | 8.20339  |
| CastlegateCO_3.FIN2  | 576   | 1.764  | 0.1006 | 0.0031 | 0.01488 | 0.00038 | 0.38519  | 97.3   | 2.9 | 95.2  | 2.4 | 146  | 73  | 95.2  | 2.4 | 2.158273 |
| CastlegateCO_4.FIN2  | 132.6 | 0.9149 | 5.117  | 0.044  | 0.33    | 0.003   | 0.55202  | 1838.3 | 7.4 | 1840  | 15  | 1842 | 16  | 1842  | 16  | 0.108578 |
| CastlegateCO_5.FIN2  | 349.9 | 3.103  | 2.567  | 0.054  | 0.2131  | 0.005   | 0.69843  | 1290   | 16  | 1245  | 27  | 1365 | 36  | 1365  | 36  | 8.791209 |
| CastlegateCO_6.FIN2  | 719   | 8.46   | 0.5425 | 0.0055 | 0.07139 | 0.00059 | 0.31199  | 439.9  | 3.6 | 444.5 | 3.6 | 426  | 25  | 444.5 | 3.6 | 1.045692 |
| CastlegateCO_7.FIN2  | 79.4  | 0.3896 | 12.3   | 0.23   | 0.4779  | 0.0085  | 0.70865  | 2626   | 17  | 2517  | 37  | 2703 | 20  | 2703  | 20  | 6.881243 |
| CastlegateCO_8.FIN2  | 202.2 | 2.125  | 4.028  | 0.037  | 0.2937  | 0.0028  | 0.68233  | 1639.3 | 7.6 | 1660  | 14  | 1633 | 15  | 1633  | 15  | 1.653399 |
| CastlegateCO_9.FIN2  | 225   | 1.275  | 0.5491 | 0.0098 | 0.07129 | 0.00096 | 0.42163  | 444    | 6.4 | 443.9 | 5.8 | 462  | 37  | 443.9 | 5.8 | 0.022523 |
| CastlegateCO_10.FIN2 | 85.1  | 2.317  | 1.72   | 0.036  | 0.1723  | 0.003   | 0.40635  | 1016   | 14  | 1026  | 16  | 994  | 40  | 1026  | 16  | 0.984252 |
| CastlegateCO_11.FIN2 | 270.9 | 9.12   | 12.98  | 0.19   | 0.4919  | 0.008   | 0.88601  | 2676   | 14  | 2582  | 35  | 2760 | 11  | 2760  | 11  | 6.449275 |
| CastlegateCO_12.FIN2 | 361.4 | 3.588  | 4.691  | 0.041  | 0.305   | 0.003   | 0.77931  | 1765.1 | 7.2 | 1716  | 15  | 1834 | 11  | 1834  | 11  | 6.434024 |
| CastlegateCO_13.FIN2 | 195   | 1.782  | 1.713  | 0.022  | 0.1702  | 0.0019  | 0.39271  | 1012.7 | 8.4 | 1013  | 11  | 1027 | 27  | 1013  | 11  | 0.029624 |
| CastlegateCO_14.FIN2 | 129.1 | 2.684  | 3.972  | 0.052  | 0.2779  | 0.0036  | 0.56215  | 1627   | 11  | 1580  | 18  | 1690 | 26  | 1690  | 26  | 6.508876 |
| CastlegateCO_15.FIN2 | 101.3 | 0.96   | 5.279  | 0.073  | 0.3421  | 0.0048  | 0.51605  | 1865   | 12  | 1896  | 23  | 1858 | 25  | 1858  | 25  | 2.04521  |
| CastlegateCO_16.FIN2 | 470   | 2.329  | 1.641  | 0.042  | 0.1689  | 0.0049  | 0.76054  | 986    | 16  | 1005  | 27  | 999  | 35  | 1005  | 27  | 1.926978 |
| CastlegateCO_17.FIN2 | 101.5 | 2.308  | 1.936  | 0.043  | 0.1813  | 0.0042  | 0.50146  | 1096   | 15  | 1073  | 23  | 1139 | 46  | 1073  | 23  | 2.09854  |
| CastlegateCO_18.FIN2 | 280   | 1.428  | 3.183  | 0.03   | 0.2519  | 0.0023  | 0.56436  | 1452.5 | 7.3 | 1448  | 12  | 1465 | 17  | 1465  | 17  | 1.16041  |
| CastlegateCO_19.FIN2 | 122.5 | 1.609  | 18.06  | 0.21   | 0.5928  | 0.0088  | 0.61864  | 2993   | 12  | 2999  | 36  | 2996 | 19  | 2996  | 19  | 0.100134 |
| CastlegateCO_20.FIN2 | 213   | 3.09   | 1.899  | 0.028  | 0.182   | 0.0023  | 0.31194  | 1079.9 | 9.7 | 1078  | 12  | 1094 | 26  | 1078  | 12  | 0.175942 |
| CastlegateCO_21.FIN2 | 211   | 4.11   | 2.254  | 0.046  | 0.196   | 0.0043  | 0.48803  | 1198   | 14  | 1153  | 23  | 1261 | 38  | 1153  | 23  | 3.75626  |
| CastlegateCO_22.FIN2 | 37.9  | 1.018  | 5.624  | 0.069  | 0.3439  | 0.0039  | 0.070658 | 1919   | 11  | 1907  | 19  | 1934 | 31  | 1934  | 31  | 1.39607  |
| CastlegateCO_23.FIN2 | 375   | 1.781  | 0.5665 | 0.0098 | 0.07315 | 0.00091 | 0.27855  | 455.4  | 6.3 | 455.1 | 5.4 | 474  | 39  | 455.1 | 5.4 | 0.065876 |
| CastlegateCO_24.FIN2 | 249   | 3.67   | 4.513  | 0.042  | 0.307   | 0.0033  | 0.70337  | 1733.9 | 7.9 | 1725  | 16  | 1747 | 15  | 1747  | 15  | 1.259302 |
| CastlegateCO_25.FIN2 | 89.3  | 0.804  | 2      | 0.11   | 0.1586  | 0.0032  | 0.095731 | 1109   | 35  | 948   | 18  | 1420 | 110 | 948   | 18  | 14.51758 |
| CastlegateCO_27.FIN2 | 131.3 | 1.359  | 5.526  | 0.058  | 0.3379  | 0.0032  | 0.56405  | 1906.2 | 9   | 1876  | 15  | 1934 | 17  | 1934  | 17  | 2.998966 |
| CastlegateCO_28.FIN2 | 77.9  | 1.696  | 0.658  | 0.017  | 0.0818  | 0.0014  | 0.21694  | 571.1  | 9.8 | 506.7 | 8.6 | 543  | 64  | 506.7 | 8.6 | 1.439409 |
| CastlegateCO_29.FIN2 | 187.6 | 2.53   | 14.34  | 0.14   | 0.5327  | 0.0055  | 0.65559  | 2149.9 | 9.1 | 2752  | 23  | 2789 | 14  | 2789  | 14  | 1.32664  |



|                       |       |       |        |        |         |         |          |        |     |        |     |      |     |        |      |           |
|-----------------------|-------|-------|--------|--------|---------|---------|----------|--------|-----|--------|-----|------|-----|--------|------|-----------|
| CastlegateCO_30.FIN2  | 67.2  | 3.52  | 3.241  | 0.065  | 0.2522  | 0.0035  | 0.4015   | 1469   | 16  | 1449   | 18  | 1497 | 36  | 1497   | 36   | 3.206413  |
| CastlegateCO_31.FIN2  | 256.2 | 1.494 | 0.439  | 0.01   | 0.05844 | 0.00071 | 0.33075  | 371.1  | 7.1 | 366.1  | 4.3 | 393  | 49  | 366.1  | 4.3  | 1.347346  |
| CastlegateCO_32.FIN2  | 35.9  | 0.572 | 11.64  | 0.15   | 0.488   | 0.007   | 0.35654  | 2575   | 12  | 2561   | 30  | 2586 | 24  | 2586   | 24   | 0.966744  |
| CastlegateCO_33.FIN2  | 87    | 1.37  | 3.17   | 0.037  | 0.2549  | 0.0035  | 0.47161  | 1449.2 | 9   | 1463   | 18  | 1438 | 25  | 1438   | 25   | 1.738526  |
| CastlegateCO_35.FIN2  | 105.9 | 0.722 | 4.016  | 0.071  | 0.2892  | 0.0048  | 0.14174  | 1636   | 14  | 1637   | 24  | 1630 | 32  | 1630   | 32   | 0.429448  |
| CastlegateCO_36.FIN2  | 184   | 1.49  | 4.095  | 0.066  | 0.2912  | 0.0064  | 0.734    | 1652   | 13  | 1646   | 32  | 1665 | 29  | 1665   | 29   | 1.141141  |
| CastlegateCO_37.FIN2  | 233   | 4.56  | 3.77   | 0.085  | 0.2728  | 0.0056  | 0.89676  | 1584   | 18  | 1554   | 28  | 1630 | 19  | 1630   | 19   | 4.662577  |
| CastlegateCO_38.FIN2  | 514   | 1.722 | 3.949  | 0.035  | 0.2826  | 0.0026  | 0.67277  | 1623.4 | 7.2 | 1604   | 13  | 1650 | 14  | 1650   | 14   | 2.787879  |
| CastlegateCO_39.FIN2  | 525   | 1.087 | 0.729  | 0.011  | 0.0906  | 0.0015  | 0.50124  | 555.8  | 6.6 | 558.9  | 8.6 | 579  | 38  | 558.9  | 8.6  | 0.557755  |
| CastlegateCO_40.FIN2  | 622   | 1.645 | 0.496  | 0.011  | 0.0619  | 0.0013  | 0.8077   | 408.4  | 7.3 | 386.9  | 7.9 | 534  | 39  | 386.9  | 7.9  | 5.264447  |
| CastlegateCO_41.FIN2  | 136   | 1.565 | 3.887  | 0.072  | 0.283   | 0.0077  | 0.71764  | 1612   | 16  | 1604   | 39  | 1629 | 35  | 1629   | 35   | 1.534684  |
| CastlegateCO_42.FIN2  | 103.7 | 1.728 | 3.655  | 0.049  | 0.2681  | 0.0028  | 0.41833  | 1561   | 11  | 1533   | 15  | 1586 | 24  | 1586   | 24   | 3.34174   |
| CastlegateCO_43.FIN2  | 184   | 3.34  | 1.827  | 0.036  | 0.178   | 0.0025  | 0.074097 | 1053   | 13  | 1057   | 14  | 1058 | 37  | 1057   | 14   | 0.379867  |
| CastlegateCO_44.FIN2  | 533   | 1.953 | 3.406  | 0.033  | 0.2611  | 0.0033  | 0.6583   | 1505.5 | 7.6 | 1497   | 16  | 1513 | 17  | 1513   | 17   | 1.057502  |
| CastlegateCO_45.FIN2  | 632   | 1.937 | 4.45   | 0.042  | 0.2921  | 0.003   | 0.76487  | 1721.1 | 7.8 | 1652   | 15  | 1801 | 13  | 1801   | 13   | 8.273182  |
| CastlegateCO_46.FIN2  | 484   | 1.398 | 0.825  | 0.011  | 0.098   | 0.0011  | 0.26951  | 611.2  | 5.9 | 602.8  | 6.5 | 636  | 26  | 602.8  | 6.5  | 1.374346  |
| CastlegateCO_47.FIN2  | 93.4  | 1.381 | 2.276  | 0.041  | 0.2025  | 0.0038  | 0.55959  | 1203   | 13  | 1188   | 20  | 1237 | 31  | 1188   | 20   | 1.246883  |
| CastlegateCO_49.FIN2  | 253   | 4.41  | 3.109  | 0.043  | 0.2496  | 0.0038  | 0.74855  | 1434   | 11  | 1436   | 20  | 1451 | 19  | 1451   | 19   | 1.03377   |
| CastlegateCO_50.FIN2  | 142.3 | 2.733 | 2.89   | 0.04   | 0.2326  | 0.0036  | 0.38637  | 1378   | 10  | 1348   | 19  | 1422 | 30  | 1422   | 30   | 5.203938  |
| CastlegateCO_51.FIN2  | 216.1 | 0.885 | 0.857  | 0.013  | 0.1022  | 0.0013  | 0.36186  | 628.8  | 7.4 | 627.4  | 7.4 | 621  | 37  | 627.4  | 7.4  | 0.222646  |
| CastlegateCO_52.FIN2  | 119.6 | 1.968 | 2.437  | 0.035  | 0.2143  | 0.0024  | 0.62172  | 1255   | 11  | 1252   | 13  | 1257 | 24  | 1257   | 24   | 0.397772  |
| CastlegateCO_53.FIN2  | 48.8  | 1.131 | 2.549  | 0.05   | 0.2222  | 0.0031  | 0.44833  | 1284   | 14  | 1293   | 16  | 1280 | 43  | 1280   | 43   | 1.015625  |
| CastlegateCO_54.FIN2  | 59    | 1.717 | 1.996  | 0.043  | 0.1885  | 0.0035  | 0.48895  | 1114   | 15  | 1112   | 19  | 1125 | 42  | 1112   | 19   | 0.179533  |
| CastlegateCO_55.FIN2  | 468   | 2.89  | 3.49   | 0.047  | 0.2666  | 0.0035  | 0.69781  | 1524   | 10  | 1523   | 18  | 1528 | 21  | 1528   | 21   | 0.327225  |
| CastlegateCO_56.FIN2  | 834   | 2.37  | 0.1041 | 0.0023 | 0.01535 | 0.00023 | 0.05242  | 100.5  | 2.1 | 98.2   | 1.4 | 149  | 54  | 98.2   | 1.4  | 2.288557  |
| CastlegateCO_57.FIN2  | 231   | 1.822 | 0.0787 | 0.0042 | 0.01188 | 0.0003  | 0.085303 | 76.8   | 4   | 76.2   | 1.9 | 160  | 110 | 76.2   | 1.9  | 0.78125   |
| CastlegateCO_58.FIN2  | 282   | 2.551 | 3.198  | 0.042  | 0.2552  | 0.004   | 0.72586  | 1456   | 10  | 1464   | 20  | 1454 | 21  | 1454   | 21   | 0.687758  |
| CastlegateCO_59.FIN2  | 79.3  | 1.975 | 2.714  | 0.066  | 0.2334  | 0.005   | 0.57493  | 1336   | 19  | 1352   | 26  | 1318 | 38  | 1318   | 38   | 2.579666  |
| CastlegateCO_60.FIN2  | 158.1 | 0.889 | 1.227  | 0.03   | 0.1296  | 0.0027  | 0.51577  | 812    | 14  | 785    | 16  | 897  | 49  | 785    | 16   | 3.325123  |
| CastlegateCO_61.FIN2  | 242   | 7.67  | 1.962  | 0.022  | 0.1863  | 0.0018  | 0.53064  | 1102.9 | 7.3 | 1101.1 | 9.5 | 1103 | 21  | 1101.1 | 9.5  | 0.163206  |
| CastlegateCO_62.FIN2  | 184.9 | 1.266 | 4.588  | 0.095  | 0.2015  | 0.0044  | 0.5389   | 1745   | 17  | 1183   | 24  | 2513 | 33  | DISC   | DISC | 32.2063   |
| CastlegateCO_63.FIN2  | 82.4  | 2.56  | 4.651  | 0.068  | 0.314   | 0.0043  | 0.47022  | 1760   | 13  | 1760   | 21  | 1765 | 27  | 1765   | 27   | 0.283286  |
| CastlegateCO_64.FIN2  | 190.3 | 0.889 | 0.545  | 0.012  | 0.07028 | 0.00078 | 0.13478  | 441.3  | 7.7 | 437.8  | 4.7 | 453  | 54  | 437.8  | 4.7  | 0.793111  |
| CastlegateCO_65.FIN2  | 207.2 | 25.6  | 0.517  | 0.015  | 0.0663  | 0.0019  | 0.27592  | 424    | 10  | 414    | 12  | 435  | 80  | 414    | 12   | 2.358491  |
| CastlegateCO_66.FIN2  | 210   | 2.013 | 2.011  | 0.028  | 0.1868  | 0.002   | 0.7551   | 1118.3 | 9.4 | 1104   | 11  | 1154 | 25  | 1104   | 11   | 1.278727  |
| CastlegateCO_67.FIN2  | 127.2 | 1.221 | 4.545  | 0.05   | 0.3076  | 0.0034  | 0.74516  | 1738.5 | 9.1 | 1729   | 17  | 1747 | 15  | 1747   | 15   | 1.030338  |
| CastlegateCO_68.FIN2  | 115   | 1.373 | 1.854  | 0.031  | 0.178   | 0.0026  | 0.26853  | 1064   | 11  | 1056   | 14  | 1083 | 41  | 1056   | 14   | 0.75188   |
| CastlegateCO_69.FIN2  | 277   | 31.8  | 0.363  | 0.01   | 0.04921 | 0.00096 | 0.25481  | 314.4  | 7.6 | 309.6  | 5.9 | 330  | 66  | 309.6  | 5.9  | 1.526718  |
| CastlegateCO_70.FIN2  | 198   | 1.005 | 0.4812 | 0.0096 | 0.06367 | 0.00095 | 0.21454  | 399.3  | 6.7 | 397.9  | 5.8 | 380  | 52  | 397.9  | 5.8  | 0.350614  |
| CastlegateCO_71.FIN2  | 322   | 2.75  | 1.892  | 0.024  | 0.1778  | 0.0024  | 0.63121  | 1077.7 | 8.4 | 1055   | 13  | 1124 | 25  | 1055   | 13   | 2.106338  |
| CastlegateCO_72.FIN2  | 703   | 5.95  | 1.869  | 0.02   | 0.1782  | 0.0016  | 0.69086  | 1069.6 | 7.1 | 1057.1 | 8.9 | 1096 | 17  | 1057.1 | 8.9  | 1.168661  |
| CastlegateCO_73.FIN2  | 47.34 | 1.189 | 3.688  | 0.083  | 0.2649  | 0.0054  | 0.43023  | 1567   | 18  | 1514   | 28  | 1644 | 42  | 1644   | 42   | 7.907543  |
| CastlegateCO_74.FIN2  | 337   | 2.413 | 0.1062 | 0.0029 | 0.01617 | 0.00035 | 0.21055  | 102.4  | 2.6 | 103.4  | 2.2 | 108  | 63  | 103.4  | 2.2  | 0.976563  |
| CastlegateCO_75.FIN2  | 275   | 7.08  | 3.7    | 0.076  | 0.2719  | 0.0059  | 0.79128  | 1569   | 17  | 1549   | 30  | 1614 | 25  | 1614   | 25   | 4.027261  |
| CastlegateCO_76.FIN2  | 110.8 | 2.48  | 2.044  | 0.032  | 0.1937  | 0.0026  | 0.37017  | 1129   | 11  | 1141   | 14  | 1116 | 32  | 1141   | 14   | 1.062888  |
| CastlegateCO_77.FIN2  | 111.1 | 1.343 | 0.794  | 0.018  | 0.0959  | 0.0014  | 0.1824   | 593    | 10  | 590.4  | 8.2 | 588  | 52  | 590.4  | 8.2  | 0.438449  |
| CastlegateCO_78.FIN2  | 192   | 1.793 | 2.742  | 0.039  | 0.2328  | 0.0029  | 0.68449  | 1339   | 11  | 1349   | 15  | 1354 | 21  | 1354   | 21   | 0.369276  |
| CastlegateCO_80.FIN2  | 372   | 1.739 | 4.215  | 0.049  | 0.299   | 0.0042  | 0.81805  | 1676.3 | 9.5 | 1686   | 21  | 1673 | 15  | 1673   | 15   | 0.777047  |
| CastlegateCO_81.FIN2  | 267   | 4.97  | 3.087  | 0.031  | 0.2487  | 0.0027  | 0.54242  | 1428.9 | 7.6 | 1431   | 14  | 1440 | 18  | 1440   | 18   | 0.625     |
| CastlegateCO_82.FIN2  | 400   | 0.941 | 1.984  | 0.04   | 0.1874  | 0.004   | 0.6681   | 1110   | 13  | 1107   | 22  | 1114 | 32  | 1107   | 22   | 0.27027   |
| CastlegateCO_83.FIN2  | 105.9 | 1.63  | 5.116  | 0.071  | 0.3242  | 0.0051  | 0.74039  | 1837   | 12  | 1809   | 25  | 1881 | 24  | 1881   | 24   | 3.827751  |
| CastlegateCO_84.FIN2  | 297   | 2.33  | 0.443  | 0.012  | 0.0567  | 0.0015  | 0.64878  | 371.7  | 8.5 | 355.4  | 9.2 | 470  | 55  | 355.4  | 9.2  | 4.385257  |
| CastlegateCO_85.FIN2  | 333   | 2.42  | 1.601  | 0.029  | 0.1628  | 0.003   | 0.70055  | 971    | 12  | 972    | 17  | 999  | 28  | 972    | 17   | 0.102987  |
| CastlegateCO_86.FIN2  | 31.92 | 1.626 | 1.958  | 0.048  | 0.1834  | 0.0038  | 0.28185  | 1101   | 16  | 1085   | 21  | 1156 | 59  | 1085   | 21   | 1.453224  |
| CastlegateCO_87.FIN2  | 268.1 | 1.168 | 0.55   | 0.1    | 0.0508  | 0.0011  | 0.82633  | 418    | 52  | 319.1  | 6.8 | 830  | 210 | 319.1  | 6.8  | 23.66029  |
| CastlegateCO_88.FIN2  | 415   | 1.383 | 0.7507 | 0.0095 | 0.0821  | 0.0018  | 0.24568  | 568.4  | 5.5 | 508    | 11  | 816  | 51  | 508    | 11   | 10.62632  |
| CastlegateCO_89.FIN2  | 678   | 2.82  | 2.759  | 0.03   | 0.231   | 0.0033  | 0.66524  | 1344   | 8.1 | 1339   | 17  | 1359 | 19  | 1359   | 19   | 1.47167   |
| CastlegateCO_90.FIN2  | 278   | 0.921 | 4.367  | 0.06   | 0.2956  | 0.0044  | 0.59924  | 1707   | 12  | 1669   | 22  | 1755 | 26  | 1755   | 26   | 4.900285  |
| CastlegateCO_91.FIN2  | 97.3  | 1.652 | 11.4   | 0.24   | 0.438   | 0.011   | 0.83082  | 2554   | 19  | 2337   | 50  | 2735 | 21  | 2735   | 21   | 14.5521   |
| CastlegateCO_92.FIN2  | 448   | 1.9   | 9.62   | 0.14   | 0.4279  | 0.0078  | 0.84765  | 2398   | 14  | 2295   | 35  | 2484 | 19  | 2484   | 19   | 7.608696  |
| CastlegateCO_92.FIN2  | 359.3 | 1.183 | 11.26  | 0.15   | 0.4849  | 0.0074  | 0.68619  | 2544   | 13  | 2548   | 32  | 2527 | 23  | 2527   | 23   | 0.831025  |
| CastlegateCO_93.FIN2  | 151.5 | 1.435 | 1.905  | 0.023  | 0.182   | 0.0025  | 0.27566  | 1082.3 | 8.2 | 1078   | 14  | 1081 | 32  | 1078   | 14   | 0.397302  |
| CastlegateCO_94.FIN2  | 222   | 2.238 | 1.902  | 0.023  | 0.1811  | 0.0028  | 0.51884  | 1081.3 | 8.2 | 1073   | 15  | 1098 | 26  | 1073   | 15   | 0.767595  |
| CastlegateCO_95.FIN2  | 117.3 | 1.398 | 0.827  | 0.034  | 0.0887  | 0.0024  | 0.17276  | 611    | 18  | 547    | 14  | 847  | 95  | 547    | 14   | 10.47463  |
| CastlegateCO_96.FIN2  | 139.6 | 1.655 | 4.358  | 0.085  | 0.2988  | 0.0053  | 0.70578  | 1703   | 16  | 1688   | 27  | 1754 | 25  | 1754   | 25   | 3.762828  |
| CastlegateCO_97.FIN2  | 185   | 2.03  | 2.98   | 0.083  | 0.2004  | 0.0054  | 0.94514  | 1401   | 22  | 1177   | 29  | 1758 | 43  | 1177   | 29   | 15.98858  |
| CastlegateCO_98.FIN2  | 237   | 1.975 | 3.072  | 0.03   | 0.2468  | 0.0027  | 0.54038  | 1425.3 | 7.5 | 1422   | 14  | 1425 | 16  | 1425   | 16   | 0.210526  |
| CastlegateCO_99.FIN2  | 368   | 0.831 | 2.899  | 0.034  | 0.2355  | 0.0028  | 0.67753  | 1380.9 | 9   | 1363   | 14  | 1417 | 17  | 1417   | 17   | 13.810868 |
| CastlegateCO_100.FIN2 | 507   | 2.79  | 2.587  | 0.04   | 0.2123  | 0.0023  | 0.77995  | 1296   | 11  | 1241   | 12  | 1386 | 18  | 1386   | 18   | 10.46176  |
| CastlegateCO_101.FIN2 | 239   | 2.4   | 3.381  | 0.033  | 0.2616  | 0.0028  | 0.56857  | 1499.5 | 7.7 | 1498   | 14  | 1517 | 17  | 1517   | 17   | 1.252472  |
| CastlegateCO_102.FIN2 | 1372  | 3.296 | 0.1015 | 0.0019 | 0.01473 | 0.00023 | 0.50273  | 98.1   | 1.7 | 94.2   | 1.5 | 168  | 37  | 94.2   | 1.5  | 3.975535  |
| CastlegateCO_103.FIN2 | 59.4  | 0.792 | 5.347  | 0.081  | 0.3299  | 0.0048  | 0.73079  | 1876   | 13  | 1837   | 23  | 1922 | 29  | 1922   | 29   | 4.422477  |
| CastlegateCO_104.FIN2 | 709   | 2.269 | 0.1783 | 0.0038 | 0.02637 | 0.00044 | 0.43964  | 167.5  | 3.5 | 167.8  | 2.8 | 165  | 51  | 167.8  | 2.8  | 0.179104  |

## San Pitch Formation sample (see figure 2)

Latitude Longitude  
19SP02 39.20694 -111.7127

## Sample Name:

| Grain #          | [U] ppm | U/Th  | 207/235 | 2σ error | 206/238 | 2σ error | RHO      | 207/235<br>Age Ma | 2σ error | 206/238<br>Age (Ma) | 2σ error | 206/207<br>Age (Ma) | 2σ error | Best age<br>(Ma) | 2σ error | % Discordance* |
|------------------|---------|-------|---------|----------|---------|----------|----------|-------------------|----------|---------------------|----------|---------------------|----------|------------------|----------|----------------|
| EP-SP02_98.FIN2  | 853     | 0.922 | 0.1112  | 0.0035   | 0.01482 | 0.00028  | 0.16536  | 106.9             | 3.2      | 94.8                | 1.8      | 365                 | 64       | 94.8             | 1.8      | 11.31899       |
| EP-SP02_108.FIN2 | 160.9   | 1.567 | 0.107   | 0.011    | 0.01526 | 0.00053  | 0.013506 | 103.1             | 9.6      | 97.6                | 3.3      | 270                 | 210      | 97.6             | 3.3      | 5.334627       |
| EP-SP02_123.FIN2 | 256     | 1.499 | 0.1017  | 0.0043   | 0.01536 | 0.00026  | 0.079324 | 98.1              | 4        | 98.3                | 1.6      | 111                 | 77       | 98.3             | 1.6      | 0.203874       |
| EP-SP02_69.FIN2  | 170.1   | 0.984 | 0.1019  | 0.0058   | 0.01543 | 0.00026  | 0.18553  | 98                | 5.3      | 98.7                | 1.7      | 77                  | 99       | 98.7             | 1.7      | 0.714286       |
| EP-SP02_86.FIN2  | 836     | 1.739 | 0.1072  | 0.0043   | 0.01545 | 0.00041  | 0.19973  | 103.3             | 3.9      | 98.9                | 2.6      | 197                 | 93       | 98.9             | 2.6      | 4.259439       |
| EP-SP02_7.FIN2   | 187.9   | 2.105 | 0.1095  | 0.0072   | 0.01555 | 0.00034  | 0.012394 | 106.5             | 7.1      | 99.5                | 2.2      | 240                 | 140      | 99.5             | 2.2      | 6.57277        |
| EP-SP02_140.FIN2 | 203.3   | 1.153 | 0.1035  | 0.0066   | 0.01556 | 0.00044  | 0.049113 | 99.6              | 6        | 99.5                | 2.8      | 130                 | 140      | 99.5             | 2.8      | 0.100402       |
| EP-SP02_63.FIN2  | 239     | 1.156 | 0.098   | 0.004    | 0.01558 | 0.00025  | 0.009095 | 94.7              | 3.7      | 99.6                | 1.6      | 15                  | 78       | 99.6             | 1.6      | 5.174234       |
| EP-SP02_87.FIN2  | 501     | 0.952 | 0.1013  | 0.0031   | 0.01557 | 0.00019  | 0.0445   | 97.8              | 2.9      | 99.6                | 1.2      | 83                  | 64       | 99.6             | 1.2      | 1.840491       |
| EP-SP02_139.FIN2 | 740     | 1.749 | 0.1004  | 0.0023   | 0.01584 | 0.00017  | 0.23728  | 97.1              | 2.1      | 101.3               | 1.1      | 33                  | 45       | 101.3            | 1.1      | 4.325438       |
| EP-SP02_93.FIN2  | 412.9   | 2.076 | 0.1053  | 0.0031   | 0.01588 | 0.00022  | 0.06624  | 101.5             | 2.8      | 101.6               | 1.4      | 110                 | 61       | 101.6            | 1.4      | 0.098522       |
| EP-SP02_57.FIN2  | 194.9   | 1.577 | 0.1065  | 0.0053   | 0.01617 | 0.00039  | 0.16487  | 102.4             | 4.9      | 103.4               | 2.5      | 97                  | 97       | 103.4            | 2.5      | 0.976563       |
| EP-SP02_119.FIN2 | 293.3   | 1.086 | 0.1092  | 0.0066   | 0.01628 | 0.00039  | 0.11789  | 105               | 6.1      | 104.1               | 2.5      | 160                 | 120      | 104.1            | 2.5      | 0.857143       |
| EP-SP02_74.FIN2  | 706     | 1.629 | 0.1074  | 0.0029   | 0.01632 | 0.00021  | 0.13498  | 103.5             | 2.7      | 104.3               | 1.3      | 91                  | 56       | 104.3            | 1.3      | 0.772947       |
| EP-SP02_125.FIN2 | 220     | 1.249 | 0.511   | 0.013    | 0.0657  | 0.0013   | 0.12438  | 418               | 8.6      | 410.2               | 7.6      | 450                 | 51       | 410.2            | 7.6      | 1.866029       |
| EP-SP02_120.FIN2 | 551     | 0.817 | 1.162   | 0.02     | 0.1078  | 0.0015   | 0.57534  | 781.3             | 9.1      | 660                 | 8.6      | 1148                | 26       | 660              | 8.6      | 15.52541       |
| EP-SP02_44.FIN2  | 256.2   | 1.389 | 1.146   | 0.016    | 0.1266  | 0.0011   | 0.18925  | 774.2             | 7.5      | 768.1               | 6.4      | 784                 | 32       | 768.1            | 6.4      | 0.78791        |
| EP-SP02_110.FIN2 | 121.6   | 1.32  | 1.553   | 0.03     | 0.1389  | 0.0019   | 0.43197  | 949               | 12       | 838                 | 11       | 1215                | 36       | 838              | 11       | 11.69652       |
| EP-SP02_111.FIN2 | 26.41   | 1.121 | 1.853   | 0.069    | 0.182   | 0.0046   | 0.43647  | 1057              | 24       | 1076                | 25       | 1008                | 71       | 1008             | 71       | 6.746032       |
| EP-SP02_99.FIN2  | 383     | 2.011 | 1.714   | 0.022    | 0.17    | 0.0019   | 0.46676  | 1012.8            | 8.4      | 1012                | 11       | 1015                | 26       | 1015             | 26       | 0.295567       |
| EP-SP02_10.FIN2  | 495     | 2.833 | 1.778   | 0.024    | 0.1733  | 0.002    | 0.50685  | 1036.7            | 9        | 1030                | 11       | 1042                | 25       | 1042             | 25       | 1.151631       |
| EP-SP02_105.FIN2 | 27.73   | 0.591 | 2       | 0.057    | 0.1934  | 0.0033   | 0.12509  | 1111              | 20       | 1139                | 18       | 1046                | 60       | 1046             | 60       | 8.891013       |
| EP-SP02_24.FIN2  | 56.5    | 0.751 | 1.868   | 0.057    | 0.1795  | 0.0028   | 0.40651  | 1064              | 20       | 1064                | 15       | 1050                | 58       | 1050             | 58       | 1.333333       |
| EP-SP02_35.FIN2  | 90.2    | 1.203 | 1.891   | 0.041    | 0.1822  | 0.0023   | 0.42405  | 1074              | 14       | 1078                | 13       | 1053                | 40       | 1053             | 40       | 2.374169       |
| EP-SP02_6.FIN2   | 188     | 3.24  | 1.891   | 0.031    | 0.1823  | 0.002    | 0.14567  | 1076              | 11       | 1079                | 11       | 1057                | 31       | 1057             | 31       | 2.081362       |
| EP-SP02_81.FIN2  | 45.6    | 0.708 | 1.872   | 0.043    | 0.1789  | 0.0026   | 0.23666  | 1067              | 15       | 1060                | 14       | 1066                | 51       | 1066             | 51       | 0.562852       |
| EP-SP02_45.FIN2  | 182.1   | 1.419 | 1.941   | 0.026    | 0.1867  | 0.0019   | 0.35132  | 1095              | 9.2      | 1103                | 10       | 1071                | 28       | 1071             | 28       | 2.987862       |
| EP-SP02_121.FIN2 | 164     | 2.283 | 1.921   | 0.034    | 0.1844  | 0.0022   | 0.28492  | 1087              | 12       | 1091                | 12       | 1075                | 36       | 1075             | 36       | 1.488372       |
| EP-SP02_127.FIN2 | 116     | 1.606 | 1.971   | 0.036    | 0.1899  | 0.0024   | 0.50386  | 1103              | 12       | 1121                | 13       | 1076                | 35       | 1076             | 35       | 4.182156       |
| EP-SP02_1.FIN2   | 249     | 2.263 | 1.953   | 0.027    | 0.1865  | 0.0017   | 0.42491  | 1098.8            | 9.4      | 1102                | 9.4      | 1087                | 26       | 1087             | 26       | 1.379945       |
| EP-SP02_37.FIN2  | 59.8    | 0.712 | 1.882   | 0.041    | 0.178   | 0.002    | 0.11314  | 1071              | 14       | 1056                | 11       | 1087                | 47       | 1087             | 47       | 2.851886       |
| EP-SP02_89.FIN2  | 21.8    | 1.119 | 1.982   | 0.068    | 0.1863  | 0.0031   | 0.37153  | 1099              | 23       | 1100                | 17       | 1088                | 66       | 1088             | 66       | 1.102941       |
| EP-SP02_92.FIN2  | 189.6   | 1.716 | 1.893   | 0.028    | 0.1808  | 0.0024   | 0.43164  | 1076.9            | 9.6      | 1071                | 13       | 1088                | 29       | 1088             | 29       | 1.5625         |
| EP-SP02_3.FIN2   | 111     | 0.853 | 1.965   | 0.033    | 0.1863  | 0.0019   | 0.37371  | 1101              | 11       | 1101                | 10       | 1089                | 35       | 1089             | 35       | 1.101928       |
| EP-SP02_55.FIN2  | 120.9   | 2.415 | 1.976   | 0.031    | 0.1891  | 0.0021   | 0.46889  | 1105              | 11       | 1116                | 11       | 1089                | 30       | 1089             | 30       | 2.479339       |
| EP-SP02_103.FIN2 | 268     | 1.415 | 1.926   | 0.023    | 0.184   | 0.0016   | 0.26761  | 1088.8            | 8.1      | 1088.7              | 8.8      | 1089                | 25       | 1089             | 25       | 0.027548       |
| EP-SP02_54.FIN2  | 443     | 2.92  | 1.997   | 0.023    | 0.1899  | 0.0016   | 0.54469  | 1113.2            | 7.7      | 1120.7              | 8.7      | 1093                | 20       | 1093             | 20       | 2.534309       |
| EP-SP02_115.FIN2 | 91      | 2.022 | 2.033   | 0.059    | 0.1913  | 0.0037   | 0.39868  | 1122              | 20       | 1128                | 20       | 1093                | 53       | 1093             | 53       | 3.202196       |
| EP-SP02_129.FIN2 | 41.59   | 0.823 | 2.074   | 0.059    | 0.1957  | 0.0029   | 0.30044  | 1137              | 19       | 1151                | 16       | 1093                | 56       | 1093             | 56       | 5.306496       |
| EP-SP02_40.FIN2  | 311.7   | 2.044 | 1.922   | 0.032    | 0.1831  | 0.0033   | 0.39403  | 1088              | 11       | 1084                | 18       | 1099                | 40       | 1099             | 40       | 1.364877       |
| EP-SP02_36.FIN2  | 115     | 1.608 | 2.017   | 0.036    | 0.1914  | 0.0019   | 0.3806   | 1119              | 12       | 1129                | 10       | 1100                | 31       | 1100             | 31       | 2.636364       |
| EP-SP02_62.FIN2  | 258.3   | 1.883 | 2.007   | 0.03     | 0.1891  | 0.0022   | 0.52783  | 1117              | 10       | 1116                | 12       | 1103                | 26       | 1103             | 26       | 1.178604       |
| EP-SP02_12.FIN2  | 52.2    | 2.018 | 1.985   | 0.045    | 0.1852  | 0.0025   | 0.21496  | 1106              | 16       | 1095                | 14       | 1105                | 47       | 1105             | 47       | 0.904977       |
| EP-SP02_51.FIN2  | 120.4   | 1.63  | 1.896   | 0.038    | 0.1786  | 0.0025   | 0.35919  | 1077              | 13       | 1059                | 14       | 1107                | 40       | 1107             | 40       | 4.336043       |
| EP-SP02_126.FIN2 | 106.7   | 0.98  | 2.003   | 0.036    | 0.1887  | 0.0027   | 0.34168  | 1117              | 12       | 1114                | 15       | 1114                | 39       | 1114             | 39       | 0              |
| EP-SP02_4.FIN2   | 213.2   | 1.162 | 2.029   | 0.041    | 0.1904  | 0.003    | 0.34809  | 1124              | 14       | 1123                | 16       | 1116                | 43       | 1116             | 43       | 0.62724        |
| EP-SP02_66.FIN2  | 123.8   | 1.064 | 1.925   | 0.041    | 0.1808  | 0.0032   | 0.52369  | 1089              | 15       | 1070                | 17       | 1120                | 36       | 1120             | 36       | 4.464286       |
| EP-SP02_118.FIN2 | 101.7   | 1.21  | 1.965   | 0.032    | 0.1847  | 0.002    | 0.27117  | 1101              | 11       | 1092                | 11       | 1121                | 31       | 1121             | 31       | 2.586976       |
| EP-SP02_68.FIN2  | 133     | 1.386 | 2.115   | 0.039    | 0.1976  | 0.0025   | 0.4446   | 1151              | 13       | 1162                | 14       | 1127                | 34       | 1127             | 34       | 3.10559        |
| EP-SP02_25.FIN2  | 56.1    | 1.159 | 2.061   | 0.043    | 0.1904  | 0.0023   | 0.15546  | 1132              | 14       | 1123                | 13       | 1133                | 45       | 1133             | 45       | 0.882613       |
| EP-SP02_58.FIN2  | 164.7   | 0.832 | 2.034   | 0.026    | 0.1893  | 0.002    | 0.37937  | 1125.6            | 8.8      | 1117                | 11       | 1135                | 26       | 1135             | 26       | 1.585903       |
| EP-SP02_91.FIN2  | 115.6   | 1.457 | 2.033   | 0.047    | 0.1884  | 0.0037   | 0.50405  | 1122              | 16       | 1112                | 20       | 1136                | 41       | 1136             | 41       | 2.112676       |
| EP-SP02_113.FIN2 | 150.1   | 1.106 | 1.989   | 0.031    | 0.1852  | 0.0022   | 0.24939  | 1110              | 10       | 1095                | 12       | 1138                | 27       | 1138             | 27       | 3.778559       |
| EP-SP02_61.FIN2  | 123.3   | 1.64  | 1.925   | 0.035    | 0.1785  | 0.0023   | 0.48173  | 1087              | 12       | 1058                | 13       | 1141                | 32       | 1141             | 32       | 7.274321       |
| EP-SP02_53.FIN2  | 174     | 1.404 | 2.009   | 0.027    | 0.1867  | 0.0018   | 0.47022  | 1118.3            | 9.3      | 1103.4              | 9.6      | 1142                | 28       | 1142             | 28       | 3.800035       |
| EP-SP02_38.FIN2  | 94.3    | 1.282 | 2.021   | 0.043    | 0.1858  | 0.0026   | 0.14307  | 1119              | 14       | 1098                | 14       | 1146                | 37       | 1146             | 37       | 4.188482       |
| EP-SP02_95.FIN2  | 156     | 1.169 | 2.356   | 0.032    | 0.2124  | 0.0023   | 0.38033  | 1228.6            | 9.8      | 1242                | 13       | 1204                | 28       | 1204             | 28       | 3.156146       |
| EP-SP02_47.FIN2  | 131.4   | 1.333 | 2.366   | 0.037    | 0.2119  | 0.0025   | 0.48371  | 1230              | 11       | 1239                | 13       | 1206                | 29       | 1206             | 29       | 2.736318       |
| EP-SP02_46.FIN2  | 334.3   | 6.57  | 2.392   | 0.038    | 0.2115  | 0.0025   | 0.50174  | 1239              | 12       | 1237                | 13       | 1237                | 29       | 1237             | 29       | 0              |
| EP-SP02_34.FIN2  | 526     | 3.75  | 2.018   | 0.028    | 0.1777  | 0.0021   | 0.5443   | 1120              | 9.5      | 1054                | 11       | 1245                | 25       | 1245             | 25       | 15.34137       |
| EP-SP02_128.FIN2 | 122.8   | 1.358 | 2.539   | 0.036    | 0.222   | 0.0024   | 0.55538  | 1281              | 10       | 1292                | 13       | 1271                | 24       | 1271             | 24       | 1.652242       |
| EP-SP02_76.FIN2  | 111     | 1.182 | 2.444   | 0.044    | 0.2114  | 0.0022   | 0.21408  | 1253              | 13       | 1236                | 12       | 1272                | 33       | 1272             | 33       | 2.830189       |
| EP-SP02_14.FIN2  | 111.3   | 2.19  | 2.73    | 0.041    | 0.2349  | 0.0027   | 0.35779  | 1334              | 11       | 1360                | 14       | 1290                | 29       | 1290             | 29       | 5.426357       |
| EP-SP02_56.FIN2  | 1353    | 2.91  | 1.793   | 0.064    | 0.1534  | 0.0045   | 0.69554  | 1040              | 23       | 919                 | 25       | 1299                | 51       | 1299             | 51       | 29.25327       |
| EP-SP02_52.FIN2  | 112.6   | 1.214 | 2.611   | 0.051    | 0.221   | 0.0032   | 0.41077  | 1301              | 14       | 1287                | 17       | 1315                | 38       | 1315             | 38       | 2.129278       |
| EP-SP02_72.FIN2  | 50.1    | 1.194 | 2.398   | 0.062    | 0.2018  | 0.0042   | 0.32795  | 1236              | 18       | 1183                | 22       | 1318                | 50       | 1318             | 50       | 10.24279       |
| EP-SP02_49.FIN2  | 198     | 0.865 | 2.67    | 0.033    | 0.2232  | 0.0023   | 0.45619  | 1318.7            | 9.1      | 1298                | 12       | 1347                | 23       | 1347             | 23       | 3.637713       |
| EP-SP02_26.FIN2  | 33.9    | 3.23  | 2.774   | 0.083    | 0.2298  | 0.0048   | 0.35327  | 1344              | 22       | 1332                | 25       | 1361                | 54       | 1361             | 54       | 2.130786       |
| EP-SP02_138.FIN2 | 149.4   | 2.577 | 2.77    | 0.05     | 0.2306  | 0.0031   | 0.71104  | 1348              | 14       | 1341                | 17       | 1371                | 30       | 1371             | 30       | 2.188184       |
| EP-SP02_9.FIN2   | 137.8   | 0.66  | 2.904   | 0.038    | 0.2379  | 0.0022   | 0.44538  | 1381.2            | 9.9      | 1375                | 12       | 1379                | 24       | 1379             |          |                |

|                  |       |        |       |       |        |        |         |        |     |      |    |      |    |      |      |          |
|------------------|-------|--------|-------|-------|--------|--------|---------|--------|-----|------|----|------|----|------|------|----------|
| EP-SP02_32.FIN2  | 61.4  | 1.511  | 3.216 | 0.065 | 0.253  | 0.0035 | 0.36747 | 1456   | 16  | 1456 | 18 | 1451 | 39 | 1451 | 39   | 0.34459  |
| EP-SP02_50.FIN2  | 294   | 1.956  | 3.111 | 0.066 | 0.246  | 0.0049 | 0.66121 | 1431   | 16  | 1416 | 25 | 1455 | 31 | 1455 | 31   | 2.680412 |
| EP-SP02_75.FIN2  | 101.4 | 2.332  | 3.084 | 0.053 | 0.2416 | 0.0037 | 0.5534  | 1427   | 13  | 1394 | 19 | 1459 | 31 | 1459 | 31   | 4.455106 |
| EP-SP02_122.FIN2 | 178   | 0.936  | 3.203 | 0.05  | 0.2542 | 0.0033 | 0.54543 | 1456   | 12  | 1459 | 17 | 1459 | 25 | 1459 | 25   | 0        |
| EP-SP02_11.FIN2  | 70.2  | 1.72   | 3.31  | 0.058 | 0.2561 | 0.003  | 0.2165  | 1482   | 14  | 1469 | 15 | 1494 | 35 | 1494 | 35   | 1.67336  |
| EP-SP02_22.FIN2  | 199.4 | 2.755  | 3.129 | 0.058 | 0.2401 | 0.0042 | 0.48399 | 1438   | 14  | 1390 | 23 | 1502 | 34 | 1502 | 34   | 7.456724 |
| EP-SP02_13.FIN2  | 125.6 | 1.617  | 3.314 | 0.041 | 0.2553 | 0.0024 | 0.48297 | 1485   | 9.8 | 1465 | 12 | 1514 | 23 | 1514 | 23   | 3.23646  |
| EP-SP02_117.FIN2 | 98.8  | 1.069  | 2.889 | 0.091 | 0.2191 | 0.0054 | 0.66734 | 1376   | 24  | 1277 | 28 | 1538 | 47 | 1538 | 47   | 16.97009 |
| EP-SP02_116.FIN2 | 194   | 1.022  | 2.767 | 0.068 | 0.2096 | 0.0051 | 0.44578 | 1345   | 19  | 1226 | 27 | 1544 | 47 | 1544 | 47   | 20.59585 |
| EP-SP02_41.FIN2  | 77.2  | 0.96   | 3.839 | 0.058 | 0.2841 | 0.0033 | 0.41369 | 1598   | 12  | 1613 | 16 | 1581 | 27 | 1581 | 27   | 2.024035 |
| EP-SP02_77.FIN2  | 286.4 | 1.431  | 3.686 | 0.063 | 0.2659 | 0.004  | 0.50331 | 1566   | 14  | 1519 | 21 | 1625 | 28 | 1625 | 28   | 6.523077 |
| EP-SP02_104.FIN2 | 306   | 1.94   | 2.971 | 0.068 | 0.2131 | 0.0051 | 0.61853 | 1397   | 17  | 1244 | 27 | 1644 | 37 | 1644 | 37   | 24.3309  |
| EP-SP02_133.FIN2 | 27.7  | 1.277  | 4.331 | 0.086 | 0.3081 | 0.0041 | 0.21561 | 1694   | 16  | 1733 | 21 | 1653 | 40 | 1653 | 40   | 4.839685 |
| EP-SP02_59.FIN2  | 46.2  | 3.28   | 4.28  | 0.08  | 0.3039 | 0.0043 | 0.50392 | 1685   | 15  | 1709 | 21 | 1655 | 31 | 1655 | 31   | 3.26284  |
| EP-SP02_2.FIN2   | 60.9  | 0.672  | 4.062 | 0.077 | 0.2861 | 0.0035 | 0.56999 | 1642   | 15  | 1621 | 17 | 1657 | 32 | 1657 | 32   | 2.172601 |
| EP-SP02_100.FIN2 | 87.8  | 2.63   | 3.816 | 0.068 | 0.2716 | 0.0051 | 0.60619 | 1592   | 15  | 1547 | 26 | 1663 | 30 | 1663 | 30   | 6.975346 |
| EP-SP02_130.FIN2 | 151   | 1.75   | 4.457 | 0.045 | 0.3116 | 0.0028 | 0.36979 | 1722.7 | 8.2 | 1748 | 14 | 1695 | 19 | 1695 | 19   | 3.126844 |
| EP-SP02_43.FIN2  | 186.5 | 2.987  | 4.287 | 0.043 | 0.2967 | 0.003  | 0.58651 | 1689.6 | 8.3 | 1674 | 15 | 1704 | 17 | 1704 | 17   | 1.760563 |
| EP-SP02_137.FIN2 | 107.5 | 4.13   | 4.1   | 0.063 | 0.2858 | 0.0047 | 0.5553  | 1653   | 13  | 1619 | 23 | 1706 | 27 | 1706 | 27   | 5.099648 |
| EP-SP02_71.FIN2  | 170.2 | 2.078  | 4.475 | 0.051 | 0.309  | 0.0029 | 0.33875 | 1724.8 | 9.4 | 1735 | 14 | 1707 | 21 | 1707 | 21   | 1.640305 |
| EP-SP02_80.FIN2  | 56.8  | 1.6    | 4.346 | 0.079 | 0.2979 | 0.003  | 0.30227 | 1699   | 15  | 1680 | 15 | 1714 | 34 | 1714 | 34   | 1.983664 |
| EP-SP02_106.FIN2 | 259   | 3.09   | 4.492 | 0.052 | 0.31   | 0.0029 | 0.62413 | 1729.1 | 9.4 | 1740 | 14 | 1718 | 16 | 1718 | 16   | 1.280559 |
| EP-SP02_17.FIN2  | 146.5 | 2.822  | 3.992 | 0.059 | 0.2728 | 0.0037 | 0.56455 | 1630   | 12  | 1554 | 19 | 1723 | 25 | 1723 | 25   | 9.808474 |
| EP-SP02_73.FIN2  | 359   | 2.187  | 4.103 | 0.059 | 0.2797 | 0.0036 | 0.59131 | 1652   | 12  | 1589 | 18 | 1724 | 23 | 1724 | 23   | 7.830626 |
| EP-SP02_124.FIN2 | 143   | 1.336  | 4.627 | 0.059 | 0.317  | 0.0033 | 0.52114 | 1752   | 11  | 1774 | 16 | 1729 | 26 | 1729 | 26   | 2.60266  |
| EP-SP02_134.FIN2 | 99.6  | 2.679  | 4.507 | 0.066 | 0.3066 | 0.0033 | 0.24596 | 1730   | 12  | 1723 | 16 | 1742 | 23 | 1742 | 23   | 1.0907   |
| EP-SP02_67.FIN2  | 377.2 | 2.692  | 4.736 | 0.042 | 0.3187 | 0.003  | 0.50901 | 1772.6 | 7.5 | 1783 | 15 | 1753 | 16 | 1753 | 16   | 1.711352 |
| EP-SP02_23.FIN2  | 242   | 1.288  | 4.328 | 0.06  | 0.2906 | 0.0037 | 0.69615 | 1698   | 11  | 1644 | 18 | 1755 | 19 | 1755 | 19   | 6.324786 |
| EP-SP02_88.FIN2  | 192.2 | 3.67   | 4.818 | 0.074 | 0.3244 | 0.0042 | 0.57301 | 1786   | 13  | 1811 | 20 | 1761 | 23 | 1761 | 23   | 2.839296 |
| EP-SP02_8.FIN2   | 246   | 1.127  | 4.487 | 0.072 | 0.3007 | 0.0054 | 0.74309 | 1727   | 13  | 1694 | 27 | 1762 | 22 | 1762 | 22   | 3.859251 |
| EP-SP02_27.FIN2  | 186.1 | 0.5086 | 4.702 | 0.066 | 0.3123 | 0.004  | 0.72048 | 1765   | 12  | 1753 | 20 | 1776 | 19 | 1776 | 19   | 1.295045 |
| EP-SP02_64.FIN2  | 390   | 2.25   | 3.453 | 0.066 | 0.2264 | 0.0041 | 0.9436  | 1514   | 15  | 1315 | 21 | 1797 | 19 | 1797 | 19   | 26.82248 |
| EP-SP02_109.FIN2 | 588   | 3.895  | 4.75  | 0.047 | 0.3139 | 0.0035 | 0.73385 | 1774.9 | 8.3 | 1759 | 17 | 1797 | 15 | 1797 | 15   | 2.114636 |
| EP-SP02_131.FIN2 | 204   | 2.705  | 4.959 | 0.073 | 0.3287 | 0.0046 | 0.62519 | 1811   | 13  | 1831 | 22 | 1800 | 23 | 1800 | 23   | 1.722222 |
| EP-SP02_42.FIN2  | 190.7 | 1.313  | 4.824 | 0.068 | 0.3165 | 0.0048 | 0.65235 | 1786   | 12  | 1771 | 23 | 1802 | 22 | 1802 | 22   | 1.720311 |
| EP-SP02_84.FIN2  | 184.3 | 1.097  | 4.783 | 0.085 | 0.3129 | 0.0048 | 0.70367 | 1779   | 15  | 1754 | 24 | 1807 | 23 | 1807 | 23   | 2.933038 |
| EP-SP02_90.FIN2  | 152   | 0.442  | 5.08  | 0.061 | 0.3293 | 0.0034 | 0.44265 | 1831   | 10  | 1834 | 17 | 1830 | 21 | 1830 | 21   | 0.218579 |
| EP-SP02_31.FIN2  | 113.9 | 1.696  | 5.104 | 0.065 | 0.327  | 0.0035 | 0.56121 | 1835   | 11  | 1823 | 17 | 1838 | 20 | 1838 | 20   | 0.816104 |
| EP-SP02_48.FIN2  | 300   | 0.854  | 5.381 | 0.057 | 0.3436 | 0.003  | 0.68429 | 1880.3 | 9.2 | 1904 | 15 | 1848 | 18 | 1848 | 18   | 3.030303 |
| EP-SP02_85.FIN2  | 121.2 | 1.136  | 5.545 | 0.078 | 0.3425 | 0.0047 | 0.58482 | 1905   | 12  | 1897 | 23 | 1916 | 22 | 1916 | 22   | 0.991649 |
| EP-SP02_70.FIN2  | 108.2 | -5.9   | 5.981 | 0.091 | 0.3643 | 0.004  | 0.62138 | 1970   | 13  | 2001 | 19 | 1932 | 21 | 1932 | 21   | 3.571429 |
| EP-SP02_82.FIN2  | 120.3 | 1.308  | 6.67  | 0.1   | 0.3603 | 0.005  | 0.67575 | 2069   | 14  | 1982 | 24 | 2152 | 22 | 2152 | 22   | 7.899628 |
| EP-SP02_132.FIN2 | 110.2 | 1.147  | 8.62  | 0.17  | 0.4273 | 0.0076 | 0.77174 | 2294   | 19  | 2290 | 35 | 2315 | 24 | 2315 | 24   | 1.079914 |
| EP-SP02_101.FIN2 | 204.6 | 1.944  | 10.45 | 0.13  | 0.4699 | 0.0065 | 0.67153 | 2473   | 12  | 2481 | 28 | 2473 | 17 | 2473 | 17   | 0.323494 |
| EP-SP02_60.FIN2  | 93.8  | 1.141  | 10.54 | 0.13  | 0.4614 | 0.005  | 0.51793 | 2481   | 11  | 2445 | 22 | 2504 | 20 | 2504 | 20   | 2.35623  |
| EP-SP02_21.FIN2  | 34.13 | 1.078  | 9.97  | 0.21  | 0.4353 | 0.008  | 0.61231 | 2427   | 20  | 2327 | 36 | 2507 | 30 | 2507 | 30   | 7.179896 |
| EP-SP02_97.FIN2  | 578   | 1.173  | 8.91  | 0.23  | 0.3848 | 0.0076 | 0.81606 | 2322   | 23  | 2097 | 35 | 2535 | 24 | 2535 | 24   | 17.27811 |
| EP-SP02_33.FIN2  | 527   | 2.389  | 11.9  | 0.15  | 0.4855 | 0.006  | 0.70839 | 2595   | 12  | 2550 | 26 | 2624 | 16 | 2624 | 16   | 2.820122 |
| EP-SP02_94.FIN2  | 152   | 1.036  | 13.12 | 0.12  | 0.5374 | 0.0052 | 0.63792 | 2686.9 | 8.9 | 2771 | 22 | 2625 | 13 | 2625 | 13   | 5.561905 |
| EP-SP02_29.FIN2  | 283   | 0.804  | 13.18 | 0.12  | 0.5304 | 0.0046 | 0.64797 | 2691.1 | 8.4 | 2742 | 19 | 2646 | 12 | 2646 | 12   | 3.628118 |
| EP-SP02_83.FIN2  | 65.3  | 0.908  | 12.07 | 0.15  | 0.4848 | 0.0053 | 0.57366 | 2608   | 11  | 2549 | 22 | 2656 | 17 | 2656 | 17   | 4.028614 |
| EP-SP02_20.FIN2  | 52.1  | 2.615  | 15.28 | 0.2   | 0.5492 | 0.0069 | 0.67163 | 2832   | 13  | 2820 | 28 | 2837 | 19 | 2837 | 19   | 0.599225 |
| EP-SP02_28.FIN2  | 65    | 1.575  | 15.88 | 0.18  | 0.558  | 0.006  | 0.62507 | 2869   | 11  | 2856 | 25 | 2869 | 16 | 2869 | 16   | 0.45312  |
| EP-SP02_112.FIN2 | 163.8 | 1.3    | 17.81 | 0.21  | 0.5877 | 0.0072 | 0.51653 | 2979   | 11  | 2978 | 29 | 2985 | 18 | 2985 | 18   | 0.234506 |
| EP-SP02_16.FIN2  | 84.3  | 4.06   | 3.85  | 0.17  | 0.2277 | 0.0096 | 0.73391 | 1601   | 34  | 1320 | 50 | 1979 | 56 | DISC | DISC | 33.29965 |
| EP-SP02_65.FIN2  | 821   | 3.55   | 2.949 | 0.062 | 0.1972 | 0.0043 | 0.89765 | 1391   | 16  | 1159 | 23 | 1768 | 17 | DISC | DISC | 34.4457  |

MDA

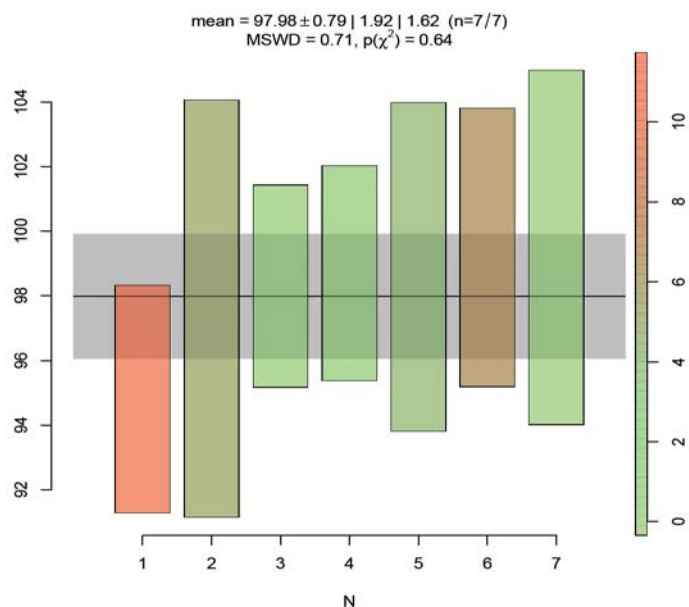

Supplement: Supplementary file 1 [file 1]
