# Supplementary material
Source: publisher figshare collection journal article supplement (https://gsapubs.figshare.com/articles/dataset/_/15145527)
Supplement: Supplementary file 2 [file 1]

Table 3. This table contains the isotopic data for all DZHe ages shown in this paper per sample location.

| Reduced (U-Th[Sm])/He Data |         |         |          | Price River Canyon |          |                 |         |             |           |      |      |                     |         |       |
|----------------------------|---------|---------|----------|--------------------|----------|-----------------|---------|-------------|-----------|------|------|---------------------|---------|-------|
| Sample                     | mineral | Age, Ma | err., Ma | U (ppm)            | Th (ppm) | 147Sm (ppm)[U]e | Th/U    | He (nmol/g) | mass (ug) | Ft   | ESR  | Final age 206 error |         |       |
| z13pruc-01                 | zircon  | 236.19  | 18.90    | 187.23             | 143.60   | 0.48            | 220.28  | 0.77        | 205.46    | 2.89 | 0.72 | 41.62               | 577.20  | 4.60  |
| z13pruc-04                 | zircon  | 126.35  | 10.11    | 53.34              | 32.92    | 1.58            | 60.92   | 0.62        | 30.98     | 3.35 | 0.74 | 44.72               | 1683.00 | 23.00 |
| z13pruc-07                 | zircon  | 290.23  | 23.22    | 159.56             | 101.56   | 1.73            | 182.95  | 0.64        | 206.74    | 2.57 | 0.71 | 39.51               | 448.10  | 4.60  |
| z13pruc-09                 | zircon  | 140.20  | 11.22    | 67.61              | 33.00    | 0.59            | 75.21   | 0.49        | 39.49     | 1.88 | 0.69 | 36.45               | 1720.30 | 8.50  |
| z13pruc-14                 | zircon  | 274.27  | 21.94    | 46.58              | 32.03    | 1.72            | 53.96   | 0.69        | 59.22     | 3.24 | 0.73 | 42.78               | 1086.00 | 12.00 |
| z13pruc-15                 | zircon  | 279.64  | 22.37    | 441.18             | 156.18   | 0.77            | 477.14  | 0.35        | 517.36    | 2.16 | 0.71 | 38.65               | 2487.90 | 4.90  |
| z13pruc-20                 | zircon  | 324.83  | 25.99    | 103.62             | 33.76    | 0.52            | 111.39  | 0.33        | 157.81    | 6.38 | 0.79 | 55.53               | 1100.00 | 12.00 |
| z13pruc-21                 | zircon  | 267.16  | 21.37    | 143.34             | 47.96    | 1.44            | 154.39  | 0.33        | 170.56    | 3.85 | 0.75 | 46.69               | 427.00  | 11.00 |
| z13pruc-22                 | zircon  | 177.47  | 14.20    | 57.79              | 33.47    | 0.76            | 65.50   | 0.58        | 48.69     | 5.11 | 0.77 | 50.38               | 1069.00 | 12.00 |
| z13pruc-27                 | zircon  | 397.21  | 31.78    | 402.96             | 15.36    | 0.97            | 406.50  | 0.04        | 638.13    | 2.28 | 0.71 | 38.76               | 412.90  | 3.20  |
| z13pruc-36                 | zircon  | 120.21  | 9.62     | 221.97             | 81.64    | 1.01            | 240.76  | 0.37        | 114.32    | 3.03 | 0.73 | 41.94               | 1464.00 | 8.80  |
| z13pruc-38                 | zircon  | 74.21   | 5.94     | 611.37             | 101.85   | 1.80            | 634.82  | 0.17        | 189.41    | 4.12 | 0.74 | 44.15               | 980.70  | 7.70  |
| z13pruc-55                 | zircon  | 227.53  | 18.20    | 62.36              | 36.26    | 0.51            | 70.71   | 0.58        | 61.59     | 2.18 | 0.70 | 38.13               | 1467.00 | 13.00 |
| z13pruc-62                 | zircon  | 168.46  | 13.48    | 62.64              | 49.53    | 1.14            | 74.04   | 0.79        | 50.06     | 3.41 | 0.73 | 44.20               | 1756.00 | 11.00 |
| z13pruc-70                 | zircon  | 292.07  | 23.37    | 61.54              | 28.44    | 0.78            | 68.09   | 0.46        | 81.81     | 4.30 | 0.75 | 45.96               | 1047.00 | 11.00 |
| z13pruc-73                 | zircon  | 71.09   | 5.69     | 351.33             | 136.67   | 4.17            | 382.81  | 0.39        | 115.44    | 6.20 | 0.78 | 53.84               | 1093.80 | 8.80  |
| z13pruc-85                 | zircon  | 400.24  | 32.02    | 223.12             | 102.13   | 2.10            | 246.64  | 0.46        | 421.27    | 5.57 | 0.77 | 50.50               | 443.70  | 3.40  |
| z13pruc-89                 | zircon  | 131.82  | 10.55    | 27.35              | 35.19    | 1.31            | 35.46   | 1.29        | 17.92     | 2.33 | 0.70 | 39.48               | 1055.00 | 14.00 |
| z13pruc-94                 | zircon  | 388.40  | 31.07    | 169.03             | 145.74   | 1.89            | 202.59  | 0.86        | 309.29    | 2.65 | 0.71 | 40.11               | 1890.00 | 6.00  |
| z13pruc-95                 | zircon  | 199.52  | 15.96    | 974.65             | 220.38   | 1.16            | 1025.39 | 0.23        | 846.32    | 4.08 | 0.76 | 47.21               | 1164.00 | 15.00 |
| z13pruc-100                | zircon  | 303.89  | 24.31    | 369.39             | 52.80    | 0.76            | 381.55  | 0.14        | 484.29    | 4.38 | 0.76 | 47.20               | 1969.50 | 7.40  |
| z13pruc-117                | zircon  | 212.37  | 16.99    | 207.32             | 133.25   | 0.87            | 238.00  | 0.64        | 202.03    | 3.52 | 0.73 | 43.11               | 523.00  | 5.20  |
| z13pruc-118                | zircon  | 327.67  | 26.21    | 85.29              | 37.50    | 0.45            | 93.93   | 0.44        | 120.45    | 2.49 | 0.71 | 39.44               | 1965.00 | 14.00 |
|                            |         |         |          |                    |          |                 |         |             |           |      |      |                     |         |       |
| z11UPR01-6                 | zircon  | 132.49  | 10.60    | 98.91              | 37.32    | 0.39            | 107.50  | 0.38        | 56.97     | 3.09 | 0.73 | 43.45               | 1646.70 | 6.50  |
| z11UPR01-10                | zircon  | 217.87  | 17.43    | 63.40              | 50.54    | 1.00            | 75.03   | 0.80        | 59.03     | 1.44 | 0.66 | 33.51               | 1674.00 | 14.00 |
| z11UPR01-11                | zircon  | 92.41   | 7.39     | 129.62             | 47.24    | 1.01            | 140.50  | 0.36        | 45.96     | 1.32 | 0.65 | 32.06               | 1487.00 | 12.00 |
| z11UPR01-14                | zircon  | 116.46  | 9.32     | 441.84             | 172.20   | 1.67            | 481.49  | 0.39        | 228.03    | 4.28 | 0.75 | 45.93               | 447.00  | 5.00  |
| z11UPR01-15                | zircon  | 162.71  | 13.02    | 138.44             | 43.71    | 0.61            | 148.50  | 0.32        | 87.28     | 1.46 | 0.66 | 33.11               | 2199.00 | 11.00 |
| z11UPR01-17                | zircon  | 201.67  | 16.13    | 184.77             | 90.14    | 0.55            | 205.53  | 0.49        | 161.63    | 2.85 | 0.71 | 40.05               | 330.10  | 3.50  |
| z11UPR01-21                | zircon  | 214.12  | 17.13    | 88.12              | 63.25    | 1.31            | 102.69  | 0.72        | 77.69     | 1.36 | 0.65 | 31.94               | 1528.00 | 14.00 |
| z11UPR01-22                | zircon  | 218.37  | 17.47    | 233.09             | 81.33    | 1.93            | 251.82  | 0.35        | 206.99    | 2.07 | 0.69 | 36.21               | 1399.00 | 15.00 |
| z11UPR01-26                | zircon  | 84.02   | 6.72     | 116.75             | 63.66    | 4.95            | 131.43  | 0.55        | 41.84     | 2.40 | 0.70 | 37.94               | 1509.00 | 11.00 |
| z11UPR01-28                | zircon  | 332.80  | 26.62    | 173.56             | 77.50    | 0.95            | 191.40  | 0.45        | 251.06    | 2.46 | 0.71 | 40.17               | 407.30  | 3.40  |
| z11UPR01-36                | zircon  | 148.52  | 11.88    | 56.53              | 18.20    | 0.64            | 60.72   | 0.32        | 33.61     | 1.73 | 0.68 | 35.70               | 2738.90 | 7.40  |
| z11UPR01-38                | zircon  | 417.42  | 33.39    | 75.56              | 62.37    | 0.39            | 89.92   | 0.83        | 158.40    | 4.57 | 0.76 | 49.12               | 535.90  | 7.00  |
| z11UPR01-49                | zircon  | 145.35  | 11.63    | 277.85             | 32.51    | 0.98            | 285.33  | 0.12        | 152.58    | 1.58 | 0.68 | 34.12               | 430.70  | 3.80  |
| z11UPR01-51                | zircon  | 79.66   | 6.37     | 111.42             | 69.57    | 0.53            | 127.44  | 0.62        | 37.09     | 1.68 | 0.67 | 34.84               | 1681.00 | 10.00 |
| z11UPR01-54                | zircon  | 239.37  | 19.15    | 84.21              | 35.89    | 0.62            | 92.48   | 0.43        | 88.68     | 3.24 | 0.73 | 42.79               | 1254.30 | 9.90  |
| z11UPR01-60                | zircon  | 116.99  | 9.36     | 92.14              | 54.90    | 1.50            | 104.78  | 0.60        | 44.96     | 1.63 | 0.67 | 34.95               | 2260.90 | 8.20  |
| z11UPR01-65                | zircon  | 154.53  | 12.36    | 105.19             | 103.68   | 1.58            | 129.07  | 0.99        | 77.17     | 2.67 | 0.71 | 40.12               | 429.50  | 4.70  |
| z11UPR01-66                | zircon  | 83.25   | 6.66     | 359.26             | 128.43   | 0.42            | 388.83  | 0.36        | 117.14    | 1.57 | 0.67 | 33.69               | 90.80   | 1.40  |
| z11UPR01-69                | zircon  | 102.83  | 8.23     | 186.20             | 41.70    | 0.76            | 195.80  | 0.22        | 79.91     | 3.07 | 0.73 | 42.33               | 1290.00 | 13.00 |
| z11UPR01-77                | zircon  | 223.06  | 17.84    | 188.63             | 32.97    | 1.01            | 196.23  | 0.17        | 165.68    | 1.86 | 0.69 | 36.26               | 1947.10 | 6.70  |
| z11UPR01-78                | zircon  | 400.87  | 32.07    | 185.90             | 12.80    | 0.62            | 188.85  | 0.07        | 325.88    | 5.20 | 0.77 | 50.65               | 1159.70 | 8.90  |
| z11UPR01-80                | zircon  | 134.73  | 10.78    | 217.16             | 132.80   | 0.64            | 247.74  | 0.61        | 128.79    | 2.59 | 0.71 | 39.57               | 1620.80 | 7.00  |
| z11UPR01-84                | zircon  | 190.76  | 15.26    | 162.68             | 71.52    | 0.82            | 179.15  | 0.44        | 126.60    | 1.77 | 0.68 | 35.17               | 1847.20 | 9.90  |
| z11UPR01-89                | zircon  | 99.79   | 7.98     | 50.77              | 25.22    | 0.52            | 56.58   | 0.50        | 20.74     | 1.70 | 0.68 | 35.01               | 2734.60 | 8.10  |
| z11UPR01-98                | zircon  | 333.83  | 26.71    | 236.01             | 66.38    | 0.66            | 251.29  | 0.28        | 320.81    | 1.86 | 0.69 | 36.79               | 1513.80 | 5.90  |
| z11UPR01-107               | zircon  | 161.32  | 12.91    | 314.81             | 121.13   | 0.90            | 342.69  | 0.38        | 188.00    | 0.99 | 0.62 | 29.35               | 240.20  | 2.60  |
| z11UPR01-117               | zircon  | 79.63   | 6.37     | 65.55              | 41.40    | 0.68            | 75.08   | 0.63        | 21.31     | 1.47 | 0.66 | 32.97               | 449.90  | 5.00  |
| z11UPR01-121               | zircon  | 241.50  | 19.32    | 65.99              | 53.40    | 1.30            | 78.29   | 0.81        | 65.92     | 1.28 | 0.64 | 31.07               | 529.50  | 8.10  |
|                            |         |         |          |                    |          |                 |         |             |           |      |      |                     |         |       |
| z11UPR02-1                 | zircon  | 135.12  | 10.81    | 30.97              | 22.99    | 0.52            | 36.27   | 0.74        | 17.46     | 1.53 | 0.65 | 32.84               | 1363.00 | 17.00 |
| z11UPR02-2                 | zircon  | 316.32  | 25.31    | 128.69             | 72.63    | 1.09            | 145.41  | 0.56        | 186.76    | 3.25 | 0.74 | 44.10               | 1782.60 | 5.20  |
| z11UPR02-9                 | zircon  | 398.78  | 31.90    | 131.29             | 44.21    | 0.74            | 141.47  | 0.34        | 215.99    | 1.99 | 0.69 | 36.61               | 1195.30 | 8.80  |
| z11UPR02-13                | zircon  | 226.96  | 18.16    | 170.36             | 91.82    | 2.71            | 191.51  | 0.54        | 159.99    | 1.81 | 0.67 | 34.62               | 1438.00 | 12.00 |
| z11UPR02-15                | zircon  | 93.09   | 7.45     | 311.16             | 72.89    | 0.86            | 327.94  | 0.23        | 111.70    | 1.58 | 0.67 | 34.25               | 1068.00 | 14.00 |
| z11UPR02-21                | zircon  | 190.35  | 15.23    | 188.77             | 82.85    | 0.99            | 207.84  | 0.44        | 147.05    | 1.72 | 0.68 | 35.44               | 1341.50 | 9.80  |
| z11UPR02-25                | zircon  | 225.74  | 18.06    | 161.96             | 88.76    | 1.42            | 182.40  | 0.55        | 158.43    | 2.15 | 0.70 | 38.59               | 1591.00 | 51.00 |
| z11UPR02-29                | zircon  | 93.32   | 7.47     | 40.81              | 26.27    | 0.61            | 46.86   | 0.64        | 16.65     | 2.22 | 0.70 | 38.50               | 1761.10 | 8.90  |
| z11UPR02-31                | zircon  | 297.45  | 23.80    | 235.61             | 61.68    | 1.31            | 249.82  | 0.26        | 279.95    | 1.82 | 0.69 | 35.63               | 1745.90 | 6.70  |
| z11UPR02-32                | zircon  | 212.61  | 17.01    | 94.79              | 22.66    | 0.79            | 100.01  | 0.24        | 84.93     | 2.86 | 0.73 | 42.21               | 1353.00 | 11.00 |
| z11UPR02-41                | zircon  | 213.61  | 17.09    | 299.88             | 132.30   | 1.26            | 330.34  | 0.44        | 266.19    | 1.98 | 0.69 | 36.61               | 1790.00 | 19.00 |
| z11UPR02-43                | zircon  | 291.87  | 23.35    | 205.37             | 104.45   | 0.75            | 229.42  | 0.51        | 257.40    | 2.27 | 0.70 | 38.01               | 426.70  | 6.40  |
| z11UPR02-44                | zircon  | 297.19  | 23.78    | 131.25             | 43.76    | 2.35            | 141.33  | 0.33        | 161.80    | 2.23 | 0.70 | 37.83               | 488.40  | 4.90  |
| z11UPR02-51                | zircon  | 353.90  | 28.31    | 102.47             | 173.60   | 3.23            | 142.45  | 1.69        | 180.13    | 1.55 | 0.65 | 32.82               | 549.00  | 11.00 |
| z11UPR02-54                | zircon  | 86.23   | 6.90     | 340.14             | 254.71   | 0.59            | 398.78  | 0.75        | 128.90    | 2.12 | 0.69 | 37.                 |         |       |

|              |                                             |         |        |        |        |       |        |      |         |      |      |       |         |       |
|--------------|---------------------------------------------|---------|--------|--------|--------|-------|--------|------|---------|------|------|-------|---------|-------|
| z11UPR03-28  | zircon                                      | 249.25  | 19.94  | 345.36 | 127.14 | 2.03  | 374.63 | 0.37 | 395.26  | 5.72 | 0.77 | 50.88 | 332.10  | 5.60  |
| z11UPR03-29  | zircon                                      | 1077.92 | 86.23  | 61.84  | 37.07  | 0.54  | 70.37  | 0.60 | 343.69  | 5.50 | 0.77 | 50.60 | 1626.00 | 20.00 |
| z11UPR03-26  | zircon                                      | 162.10  | 12.97  | 63.63  | 60.74  | 0.74  | 77.62  | 0.95 | 53.63   | 5.98 | 0.78 | 54.35 | 367.90  | 8.00  |
| z11UPR03-22  | zircon                                      | 441.72  | 35.34  | 413.73 | 320.90 | 3.27  | 487.62 | 0.78 | 880.37  | 3.31 | 0.73 | 44.14 | 1461.00 | 28.00 |
| z11UPR03-24  | zircon                                      | 383.13  | 30.65  | 228.14 | 162.20 | 3.11  | 265.50 | 0.71 | 415.29  | 3.57 | 0.74 | 44.44 | 404.80  | 7.10  |
| z11UPR03-34  | zircon                                      | 269.13  | 21.53  | 172.11 | 88.80  | 1.15  | 192.56 | 0.52 | 216.82  | 4.90 | 0.76 | 48.93 | 635.00  | 14.00 |
| z11UPR03-36  | zircon                                      | 1321.26 | 105.70 | 50.90  | 61.16  | 2.01  | 64.99  | 1.20 | 406.54  | 8.00 | 0.78 | 55.77 | 3601.00 | 15.00 |
| z11UPR03-37  | zircon                                      | 249.46  | 19.96  | 285.83 | 93.64  | 0.60  | 307.39 | 0.33 | 309.82  | 3.44 | 0.74 | 43.58 | 1064.00 | 17.00 |
| z11UPR03-38  | zircon                                      | 496.73  | 39.74  | 45.26  | 26.28  | 1.45  | 51.32  | 0.58 | 112.02  | 6.78 | 0.78 | 54.89 | 1055.00 | 17.00 |
| z11UPR03-53  | zircon                                      | 453.96  | 36.32  | 137.92 | 95.64  | 0.87  | 159.94 | 0.69 | 308.88  | 5.43 | 0.76 | 49.77 | 422.10  | 9.60  |
| z11UPR03-59  | zircon                                      | 452.96  | 36.24  | 142.77 | 38.18  | 0.96  | 151.57 | 0.27 | 294.47  | 5.24 | 0.77 | 50.07 | 1061.00 | 19.00 |
| z11UPR03-62  | zircon                                      | 394.44  | 31.56  | 208.60 | 47.54  | 8.88  | 219.59 | 0.23 | 352.21  | 2.96 | 0.73 | 42.73 | 1045.00 | 19.00 |
| z11UPR03-64  | zircon                                      | 370.81  | 29.66  | 99.86  | 49.79  | 0.64  | 111.32 | 0.50 | 175.25  | 5.12 | 0.77 | 50.09 | 579.90  | 9.70  |
| z11UPR03-79  | zircon                                      | 312.25  | 24.98  | 324.87 | 188.07 | 0.91  | 368.17 | 0.58 | 476.64  | 4.25 | 0.75 | 47.13 | 341.10  | 5.20  |
| z11UPR03-97  | zircon                                      | 1125.45 | 90.04  | 198.48 | 53.27  | 0.58  | 210.74 | 0.27 | 1031.99 | 3.06 | 0.73 | 42.95 | 1050.00 | 14.00 |
| z11UPR03-115 | zircon                                      | 342.54  | 27.40  | 265.94 | 206.53 | 1.81  | 313.49 | 0.78 | 435.26  | 3.44 | 0.73 | 43.97 | 328.30  | 7.00  |
| z11UPR03-121 | zircon                                      | 157.81  | 12.62  | 87.81  | 62.70  | 12.89 | 102.31 | 0.71 | 65.38   | 3.99 | 0.74 | 45.39 | 1523.00 | 24.00 |
|              |                                             |         |        |        |        |       |        |      |         |      |      |       |         |       |
| z11UPR04-06  | zircon                                      | 195.53  | 15.64  | 33.57  | 30.65  | 3.33  | 40.64  | 0.91 | 27.23   | 1.23 | 0.63 | 30.26 | 571.00  | 15.00 |
| z11UPR04-12  | zircon                                      | 491.31  | 39.30  | 113.74 | 22.93  | 2.30  | 119.03 | 0.20 | 212.97  | 1.33 | 0.65 | 31.89 | 1716.00 | 18.00 |
| z11UPR04-13  | zircon                                      | 349.53  | 27.96  | 61.62  | 35.17  | 4.68  | 69.74  | 0.57 | 90.47   | 1.75 | 0.67 | 34.69 | 2129.00 | 22.00 |
| z11UPR04-17  | zircon                                      | 302.12  | 24.17  | 163.17 | 78.84  | 4.43  | 181.34 | 0.48 | 201.79  | 1.62 | 0.67 | 34.21 | 485.50  | 9.30  |
| z11UPR04-18  | zircon                                      | 332.78  | 26.62  | 108.73 | 38.13  | 2.94  | 117.52 | 0.35 | 146.20  | 1.74 | 0.68 | 34.98 | 1563.00 | 30.00 |
| z11UPR04-19  | zircon                                      | 279.65  | 22.37  | 142.68 | 53.40  | 10.10 | 155.02 | 0.37 | 142.89  | 0.91 | 0.60 | 27.35 | 605.00  | 10.00 |
| z11UPR04-21  | zircon                                      | 333.29  | 26.66  | 104.93 | 38.17  | 3.33  | 113.73 | 0.36 | 139.86  | 1.85 | 0.67 | 33.96 | 1797.00 | 18.00 |
| z11UPR04-26  | zircon                                      | 289.07  | 23.13  | 95.03  | 54.07  | 4.52  | 107.50 | 0.57 | 111.47  | 1.36 | 0.65 | 32.47 | 2694.00 | 11.00 |
| z11UPR04-28  | zircon                                      | 406.24  | 32.50  | 71.91  | 34.63  | 3.31  | 79.90  | 0.48 | 115.86  | 1.24 | 0.64 | 31.53 | 1619.00 | 22.00 |
| z11UPR04-37  | zircon                                      | 558.30  | 44.66  | 68.74  | 32.58  | 2.88  | 76.26  | 0.47 | 163.52  | 1.78 | 0.69 | 36.17 | 1072.00 | 21.00 |
| z11UPR04-39  | zircon                                      | 99.43   | 7.95   | 58.62  | 19.37  | 3.87  | 63.10  | 0.33 | 21.36   | 1.06 | 0.63 | 29.51 | 2850.00 | 16.00 |
| z11UPR04-47  | zircon                                      | 225.08  | 18.01  | 270.86 | 171.48 | 8.02  | 310.38 | 0.63 | 254.56  | 2.17 | 0.67 | 33.97 | 338.10  | 6.70  |
| z11UPR04-50  | zircon                                      | 172.90  | 13.83  | 176.15 | 199.21 | 9.09  | 222.05 | 1.13 | 133.49  | 1.24 | 0.64 | 31.38 | 1655.00 | 14.00 |
| z11UPR04-57  | zircon                                      | 169.88  | 13.59  | 111.36 | 72.37  | 5.51  | 128.04 | 0.65 | 81.86   | 2.05 | 0.69 | 36.94 | 1470.00 | 26.00 |
| z11UPR04-59  | zircon                                      | 283.92  | 22.71  | 168.51 | 199.26 | 10.01 | 214.43 | 1.18 | 211.25  | 1.13 | 0.63 | 30.92 | 617.00  | 11.00 |
| z11UPR04-64  | zircon                                      | 631.38  | 50.51  | 110.60 | 27.52  | 3.27  | 116.95 | 0.25 | 259.88  | 0.94 | 0.63 | 29.33 | 1054.00 | 21.00 |
| z11UPR04-65  | zircon                                      | 273.27  | 21.86  | 86.43  | 74.36  | 3.39  | 103.56 | 0.86 | 109.07  | 2.42 | 0.70 | 38.84 | 425.40  | 7.60  |
| z11UPR04-73  | zircon                                      | 421.76  | 33.74  | 232.43 | 171.89 | 14.06 | 272.07 | 0.74 | 435.30  | 1.90 | 0.68 | 36.35 | 415.20  | 7.50  |
| z11UPR04-76  | zircon                                      | 90.82   | 7.27   | 153.69 | 86.75  | 5.74  | 173.69 | 0.56 | 53.91   | 1.07 | 0.63 | 30.12 | 1091.00 | 17.00 |
| z11UPR04-82  | zircon                                      | 348.97  | 27.92  | 145.59 | 42.58  | 4.49  | 155.41 | 0.29 | 215.23  | 2.73 | 0.72 | 40.44 | 375.60  | 6.70  |
| z11UPR04-93  | zircon                                      | 153.92  | 12.31  | 130.71 | 77.19  | 4.34  | 148.50 | 0.59 | 74.85   | 0.94 | 0.60 | 27.67 | 1508.00 | 18.00 |
|              |                                             |         |        |        |        |       |        |      |         |      |      |       |         |       |
| z11UPR05-X   | NO DATA: ZIRCON GRAINS SMALLER THAN < 30 um |         |        |        |        |       |        |      |         |      |      |       |         |       |
|              |                                             |         |        |        |        |       |        |      |         |      |      |       |         |       |
| z11UPR06-3   | zircon                                      | 310.10  | 24.81  | 89.06  | 72.06  | 0.84  | 105.66 | 0.81 | 135.99  | 4.29 | 0.75 | 47.68 | 1780.00 | 12.00 |
| z11UPR06-4   | zircon                                      | 78.23   | 6.26   | 204.86 | 54.53  | 1.09  | 217.42 | 0.27 | 66.04   | 2.58 | 0.72 | 40.03 | 623.80  | 9.10  |
| z11UPR06-9   | zircon                                      | 428.55  | 34.28  | 67.36  | 10.54  | 1.34  | 69.79  | 0.16 | 120.28  | 2.62 | 0.72 | 40.84 | 1061.00 | 11.00 |
| z11UPR06-10  | zircon                                      | 369.66  | 29.57  | 80.72  | 38.58  | 0.55  | 89.60  | 0.48 | 135.59  | 3.48 | 0.74 | 44.51 | 1594.00 | 17.00 |
| z11UPR06-13  | zircon                                      | 324.74  | 25.98  | 129.44 | 48.71  | 0.75  | 140.66 | 0.38 | 188.43  | 4.04 | 0.75 | 45.81 | 655.90  | 5.80  |
| z11UPR06-17  | zircon                                      | 82.69   | 6.62   | 230.07 | 110.01 | 0.91  | 255.40 | 0.48 | 82.96   | 2.85 | 0.72 | 41.77 | 98.00   | 2.00  |
| z11UPR06-19  | zircon                                      | 284.86  | 22.79  | 104.89 | 32.93  | 0.25  | 112.47 | 0.31 | 120.46  | 1.79 | 0.68 | 35.66 | 411.20  | 5.10  |
| z11UPR06-20  | zircon                                      | 79.64   | 6.37   | 160.04 | 94.64  | 5.05  | 181.85 | 0.59 | 57.92   | 3.41 | 0.74 | 44.24 | 1676.80 | 9.10  |
| z11UPR06-22  | zircon                                      | 329.04  | 26.32  | 72.16  | 29.56  | 0.46  | 78.97  | 0.41 | 103.40  | 2.69 | 0.72 | 41.20 | 2608.10 | 7.60  |
| z11UPR06-23  | zircon                                      | 333.27  | 26.66  | 113.49 | 41.57  | 0.77  | 123.06 | 0.37 | 169.37  | 3.80 | 0.75 | 45.85 | 1676.00 | 11.00 |
| z11UPR06-28  | zircon                                      | 223.41  | 17.87  | 148.62 | 55.35  | 1.44  | 161.37 | 0.37 | 148.65  | 4.15 | 0.75 | 46.83 | 2605.80 | 6.50  |
| z11UPR06-33  | zircon                                      | 282.44  | 22.59  | 117.51 | 71.13  | 0.98  | 133.88 | 0.61 | 147.61  | 2.44 | 0.71 | 39.78 | 1067.00 | 11.00 |
| z11UPR06-38  | zircon                                      | 91.68   | 7.33   | 129.93 | 36.12  | 0.90  | 138.25 | 0.28 | 51.49   | 3.82 | 0.75 | 45.77 | 1699.80 | 8.90  |
| z11UPR06-53  | zircon                                      | 125.44  | 10.04  | 232.50 | 31.14  | 1.00  | 239.68 | 0.13 | 124.58  | 4.40 | 0.76 | 48.06 | 1703.40 | 9.40  |
| z11UPR06-55  | zircon                                      | 81.87   | 6.55   | 451.21 | 160.12 | 0.87  | 488.08 | 0.35 | 156.77  | 2.98 | 0.72 | 41.40 | 80.90   | 4.50  |
| z11UPR06-62  | zircon                                      | 323.09  | 25.85  | 105.58 | 85.84  | 2.02  | 125.35 | 0.81 | 155.78  | 2.18 | 0.70 | 38.29 | 1786.00 | 10.00 |
| z11UPR06-65  | zircon                                      | 318.15  | 25.45  | 59.61  | 33.87  | 2.77  | 67.42  | 0.57 | 86.47   | 3.64 | 0.73 | 43.15 | 1027.00 | 15.00 |
| z11UPR06-67  | zircon                                      | 299.88  | 23.99  | 94.46  | 64.89  | 0.95  | 109.40 | 0.69 | 126.10  | 2.14 | 0.70 | 38.22 | 2722.00 | 11.00 |
| z11UPR06-69  | zircon                                      | 79.85   | 6.39   | 138.70 | 66.89  | 0.40  | 154.10 | 0.48 | 50.04   | 3.89 | 0.75 | 46.45 | 94.20   | 1.80  |
| z11UPR06-76  | zircon                                      | 347.19  | 27.77  | 78.70  | 47.61  | 0.60  | 89.66  | 0.61 | 122.03  | 2.45 | 0.71 | 39.77 | 1655.00 | 17.00 |
| z11UPR06-77  | zircon                                      | 139.55  | 11.16  | 160.22 | 61.09  | 1.07  | 174.29 | 0.38 | 93.27   | 2.21 | 0.70 | 38.53 | 2198.00 | 10.00 |
| z11UPR06-79  | zircon                                      | 354.10  | 28.33  | 101.50 | 80.31  | 1.04  | 119.99 | 0.79 | 174.76  | 3.82 | 0.74 | 45.85 | 437.10  | 4.70  |
| z11UPR06-93  | zircon                                      | 183.36  | 14.67  | 196.87 | 48.42  | 0.87  | 208.02 | 0.25 | 155.16  | 4.22 | 0.74 | 44.94 | 463.00  | 10.00 |
| z11UPR06-102 | zircon                                      | 214.56  | 17.16  | 33.84  | 27.88  | 0.98  | 40.27  | 0.82 | 34.88   | 3.63 | 0.74 | 44.62 | 493.20  | 7.90  |
| z11UPR06-114 | zircon                                      | 340.03  | 27.20  | 268.18 | 156.84 | 5.41  | 304.32 | 0.58 | 402.55  | 2.22 | 0.70 | 38.99 | 1730.10 | 7.80  |
| z11UPR06-120 | zircon                                      | 418.04  | 33.44  | 130.65 | 50.44  | 0.49  | 142.27 | 0.39 | 235.11  | 2.33 | 0.71 | 39.71 | 625.80  | 6.70  |
|              |                                             |         |        |        |        |       |        |      |         |      |      |       |         |       |
| z11UPR07-6   | zircon                                      | 128.10  | 10.25  | 37.80  | 18.66  | 1.02  | 42.10  | 0.49 | 18.92   | 1.29 | 0.64 | 31.54 | 1016.00 | 14.00 |
| z11UPR07-9   | zircon                                      | 293.05  | 23.44  | 178.34 | 59.51  | 1.37  | 192.05 | 0.33 | 225.66  | 3.04 | 0.73 | 42.23 | 1242.00 |       |

|              |        |        |       |        |        |       |        |      |        |      |      |       |         |       |
|--------------|--------|--------|-------|--------|--------|-------|--------|------|--------|------|------|-------|---------|-------|
| z11UPR07-89  | zircon | 627.03 | 50.16 | 50.23  | 15.30  | 0.49  | 53.75  | 0.30 | 121.49 | 1.14 | 0.64 | 30.87 | 556.00  | 21.00 |
| z11UPR07-95  | zircon | 113.81 | 9.10  | 219.65 | 72.69  | 3.21  | 236.40 | 0.33 | 96.53  | 1.33 | 0.66 | 32.86 | 1710.10 | 9.50  |
| z11UPR07-96  | zircon | 187.06 | 14.96 | 73.90  | 79.90  | 1.23  | 92.30  | 1.08 | 59.99  | 1.19 | 0.64 | 31.27 | 614.00  | 13.00 |
| z11UPR07-100 | zircon | 121.24 | 9.70  | 66.17  | 37.32  | 1.03  | 74.77  | 0.56 | 31.13  | 1.10 | 0.63 | 30.30 | 1197.00 | 16.00 |
| z11UPR07-106 | zircon | 185.34 | 14.83 | 66.01  | 26.53  | 0.68  | 72.12  | 0.40 | 45.49  | 0.99 | 0.62 | 29.34 | 2747.00 | 13.00 |
| z11UPR07-114 | zircon | 704.33 | 56.35 | 46.48  | 25.33  | 0.79  | 52.31  | 0.55 | 136.01 | 1.42 | 0.65 | 32.52 | 875.00  | 26.00 |
| z11UPR07-115 | zircon | 185.47 | 14.84 | 27.29  | 28.62  | 2.21  | 33.89  | 1.05 | 21.91  | 1.22 | 0.64 | 31.45 | 2979.80 | 7.80  |
| z11UPR07-116 | zircon | 186.69 | 14.94 | 121.61 | 118.22 | 1.96  | 148.84 | 0.97 | 97.07  | 1.27 | 0.64 | 31.53 | 1492.00 | 14.00 |
| z11UPR07-118 | zircon | 248.79 | 19.90 | 19.97  | 16.51  | 1.14  | 23.77  | 0.83 | 20.52  | 1.08 | 0.63 | 30.76 | 2662.00 | 33.00 |
|              |        |        |       |        |        |       |        |      |        |      |      |       |         |       |
| zPanther-02  | zircon | 339.02 | 27.12 | 74.39  | 55.08  | 1.53  | 87.08  | 0.74 | 119.80 | 3.32 | 0.73 | 44.09 | 503.10  | 5.60  |
| zPanther-05  | zircon | 118.97 | 9.52  | 164.89 | 97.72  | 2.68  | 187.40 | 0.59 | 82.54  | 1.89 | 0.68 | 35.70 | 1682.00 | 14.00 |
| zPanther-07  | zircon | 407.55 | 32.60 | 76.75  | 26.30  | 1.53  | 82.81  | 0.34 | 137.29 | 3.30 | 0.73 | 42.99 | 2867.00 | 13.00 |
| zPanther-08  | zircon | 368.70 | 29.50 | 242.55 | 195.68 | 4.40  | 287.62 | 0.81 | 422.68 | 2.76 | 0.72 | 41.73 | 576.30  | 5.00  |
| zPanther-11  | zircon | 283.55 | 22.68 | 254.46 | 156.58 | 4.88  | 290.53 | 0.62 | 331.95 | 3.11 | 0.73 | 43.48 | 384.50  | 4.00  |
| zPanther-15  | zircon | 149.90 | 11.99 | 71.44  | 75.18  | 4.50  | 88.77  | 1.05 | 52.07  | 2.70 | 0.72 | 41.43 | 1615.00 | 22.00 |
| zPanther-31  | zircon | 263.39 | 21.07 | 170.76 | 81.75  | 5.12  | 189.60 | 0.48 | 192.25 | 2.37 | 0.70 | 38.28 | 418.60  | 4.50  |
| zPanther-46  | zircon | 227.83 | 18.23 | 147.90 | 90.21  | 6.10  | 168.70 | 0.61 | 144.24 | 1.83 | 0.68 | 36.33 | 1895.00 | 28.00 |
| zPanther-48  | zircon | 129.03 | 10.32 | 257.40 | 153.36 | 6.35  | 292.74 | 0.60 | 139.32 | 1.75 | 0.68 | 35.35 | 1042.00 | 11.00 |
| zPanther-52  | zircon | 554.41 | 44.35 | 53.32  | 49.03  | 5.97  | 64.64  | 0.92 | 143.26 | 2.88 | 0.71 | 40.75 | 975.00  | 11.00 |
| zPanther-55  | zircon | 317.98 | 25.44 | 198.10 | 36.06  | 8.28  | 206.44 | 0.18 | 257.90 | 2.45 | 0.71 | 39.27 | 373.30  | 4.80  |
| zPanther-59  | zircon | 90.20  | 7.22  | 61.47  | 31.44  | 1.79  | 68.72  | 0.51 | 24.97  | 3.95 | 0.74 | 45.06 | 1573.00 | 24.00 |
| zPanther-60  | zircon | 206.63 | 16.53 | 202.91 | 46.60  | 4.77  | 213.66 | 0.23 | 168.16 | 2.12 | 0.70 | 37.09 | 923.00  | 7.20  |
| zPanther-64  | zircon | 308.52 | 24.68 | 123.13 | 60.24  | 2.21  | 137.01 | 0.49 | 180.57 | 5.49 | 0.77 | 52.03 | 1691.00 | 12.00 |
| zPanther-65  | zircon | 851.27 | 68.10 | 37.04  | 15.89  | 1.79  | 40.71  | 0.43 | 139.01 | 2.26 | 0.70 | 37.87 | 970.00  | 12.00 |
| zPanther-67  | zircon | 169.31 | 13.54 | 102.68 | 75.96  | 1.93  | 120.18 | 0.74 | 79.31  | 2.62 | 0.71 | 40.60 | 500.20  | 5.80  |
| zPanther-73  | zircon | 225.75 | 18.06 | 88.88  | 48.91  | 2.38  | 100.15 | 0.55 | 88.50  | 2.55 | 0.71 | 40.39 | 583.60  | 9.00  |
| zPanther-76  | zircon | 260.08 | 20.81 | 161.03 | 86.09  | 3.90  | 180.87 | 0.53 | 180.72 | 2.34 | 0.70 | 38.19 | 404.10  | 4.60  |
| zPanther-90  | zircon | 375.53 | 30.04 | 209.49 | 114.02 | 6.69  | 235.77 | 0.54 | 331.34 | 1.97 | 0.68 | 35.19 | 1664.00 | 16.00 |
| zPanther-96  | zircon | 107.49 | 8.60  | 99.42  | 56.09  | 3.92  | 112.35 | 0.56 | 46.95  | 2.58 | 0.71 | 40.51 | 1730.00 | 16.00 |
| zPanther-103 | zircon | 152.97 | 12.24 | 119.63 | 45.57  | 8.17  | 130.16 | 0.38 | 77.61  | 2.60 | 0.71 | 40.15 | 1786.00 | 12.00 |
| zPanther-120 | zircon | 189.21 | 15.14 | 68.04  | 105.73 | 20.41 | 92.48  | 1.55 | 64.16  | 1.69 | 0.67 | 35.25 | 2482.00 | 22.00 |

## Reduced (U-Th[Sm])/He Data

## N San Rafael Swell

| Sample        | mineral | Age, Ma | err., Ma | U (ppm) | Th (ppm) | 147Sm (pp [U]e | Th/U   | He (nmol/g mass (ug) | Ft     | ESR  | Final age 2 error |       |         |       |
|---------------|---------|---------|----------|---------|----------|----------------|--------|----------------------|--------|------|-------------------|-------|---------|-------|
| z11UCCR04-4   | zircon  | 290.73  | 23.26    | 32.12   | 31.04    | 0.89           | 39.27  | 0.97                 | 43.11  | 2.25 | 0.69              | 36.92 | 1682.00 | 17.00 |
| z11UCCR04-6   | zircon  | 159.16  | 12.73    | 205.56  | 72.31    | 0.99           | 222.21 | 0.35                 | 146.55 | 4.51 | 0.76              | 48.29 | 1753.40 | 9.20  |
| z11UCCR04-8   | zircon  | 972.64  | 77.81    | 38.76   | 24.52    | 0.68           | 44.41  | 0.63                 | 184.66 | 3.58 | 0.73              | 44.02 | 376.90  | 4.70  |
| z11UCCR04-10  | zircon  | 380.61  | 30.45    | 60.53   | 24.42    | 0.75           | 66.15  | 0.40                 | 100.44 | 3.11 | 0.72              | 41.04 | 1078.30 | 9.30  |
| z11UCCR04-14  | zircon  | 151.15  | 12.09    | 94.11   | 52.45    | 1.12           | 106.19 | 0.56                 | 64.98  | 4.67 | 0.74              | 45.23 | 1070.10 | 7.30  |
| z11UCCR04-15  | zircon  | 194.50  | 15.56    | 27.34   | 21.66    | 0.70           | 32.33  | 0.79                 | 25.97  | 4.79 | 0.75              | 48.14 | 1066.00 | 13.00 |
| z11UCCR04-17  | zircon  | 132.83  | 10.63    | 99.81   | 69.02    | 0.63           | 115.71 | 0.69                 | 58.75  | 2.46 | 0.70              | 38.73 | 988.40  | 8.70  |
| z11UCCR04-19  | zircon  | 189.47  | 15.16    | 73.44   | 62.35    | 0.87           | 87.80  | 0.85                 | 69.44  | 4.71 | 0.76              | 49.99 | 2807.00 | 5.90  |
| z11UCCR04-22  | zircon  | 359.26  | 28.74    | 73.81   | 54.70    | 0.63           | 86.40  | 0.74                 | 125.56 | 3.50 | 0.73              | 43.50 | 613.80  | 8.90  |
| z11UCCR04-24  | zircon  | 265.31  | 21.23    | 93.10   | 31.37    | 1.00           | 100.33 | 0.34                 | 111.16 | 4.88 | 0.76              | 48.26 | 1776.00 | 6.90  |
| z11UCCR04-30  | zircon  | 151.64  | 12.13    | 100.12  | 65.74    | 1.44           | 115.26 | 0.66                 | 73.51  | 5.43 | 0.77              | 51.55 | 1473.90 | 7.40  |
| z11UCCR04-34  | zircon  | 316.95  | 25.36    | 188.04  | 185.62   | 1.40           | 230.77 | 0.99                 | 286.71 | 2.78 | 0.71              | 40.45 | 635.20  | 5.90  |
| z11UCCR04-36  | zircon  | 154.77  | 12.38    | 113.34  | 63.68    | 1.49           | 128.01 | 0.56                 | 83.54  | 5.55 | 0.77              | 51.82 | 1443.00 | 14.00 |
| z11UCCR04-40  | zircon  | 299.56  | 23.96    | 185.28  | 101.99   | 0.54           | 208.76 | 0.55                 | 258.70 | 5.13 | 0.75              | 46.88 | 610.00  | 7.70  |
| z11UCCR04-42  | zircon  | 121.68  | 9.73     | 130.43  | 75.03    | 2.08           | 147.71 | 0.58                 | 67.30  | 2.40 | 0.69              | 36.67 | 1434.00 | 14.00 |
| z11UCCR04-49  | zircon  | 335.71  | 26.86    | 76.67   | 34.92    | 0.63           | 84.71  | 0.46                 | 120.36 | 4.76 | 0.77              | 49.92 | 1094.60 | 9.30  |
| z11UCCR04-51  | zircon  | 433.70  | 34.70    | 31.25   | 18.73    | 0.33           | 35.56  | 0.60                 | 66.65  | 5.97 | 0.78              | 52.65 | 1465.00 | 15.00 |
| z11UCCR04-54  | zircon  | 144.42  | 11.55    | 163.49  | 56.07    | 1.05           | 176.40 | 0.34                 | 101.73 | 3.39 | 0.73              | 43.04 | 1099.00 | 8.50  |
| z11UCCR04-64  | zircon  | 413.90  | 33.11    | 32.42   | 13.21    | 0.58           | 35.47  | 0.41                 | 58.54  | 2.88 | 0.72              | 40.74 | 1073.00 | 16.00 |
| z11UCCR04-66  | zircon  | 305.49  | 24.44    | 68.21   | 53.15    | 1.33           | 80.45  | 0.78                 | 95.28  | 2.41 | 0.70              | 39.14 | 2684.80 | 5.20  |
| z11UCCR04-72  | zircon  | 368.89  | 29.51    | 73.02   | 37.05    | 0.75           | 81.55  | 0.51                 | 131.56 | 6.49 | 0.79              | 55.87 | 2476.00 | 7.10  |
| z11UCCR04-80  | zircon  | 117.44  | 9.40     | 33.44   | 28.08    | 0.64           | 39.91  | 0.84                 | 19.27  | 4.67 | 0.75              | 48.26 | 1074.00 | 12.00 |
| z11UCCR04-83  | zircon  | 683.55  | 54.68    | 96.21   | 63.70    | 1.63           | 110.88 | 0.66                 | 318.85 | 3.48 | 0.74              | 45.30 | 1458.00 | 11.00 |
| z11UCCR04-84  | zircon  | 312.35  | 24.99    | 47.80   | 15.42    | 0.11           | 51.35  | 0.32                 | 68.24  | 4.93 | 0.77              | 50.80 | 2073.60 | 6.70  |
| z11UCCR04-85  | zircon  | 148.78  | 11.90    | 42.31   | 12.45    | 1.90           | 45.19  | 0.29                 | 27.16  | 3.64 | 0.74              | 44.44 | 1677.00 | 14.00 |
| z11UCCR04-92  | zircon  | 289.76  | 23.18    | 280.53  | 162.59   | 0.69           | 317.96 | 0.58                 | 387.85 | 5.18 | 0.76              | 49.85 | 294.40  | 3.40  |
| z11UCCR04-99  | zircon  | 330.27  | 26.42    | 52.06   | 34.54    | 0.69           | 60.01  | 0.66                 | 77.58  | 2.73 | 0.71              | 39.82 | 481.30  | 5.60  |
| z11UCCR04-101 | zircon  | 686.66  | 54.93    | 54.89   | 46.78    | 1.63           | 65.67  | 0.85                 | 193.41 | 4.52 | 0.75              | 48.44 | 2128.10 | 8.50  |
| z11UCCR04-107 | zircon  | 144.54  | 11.56    | 233.83  | 146.63   | 1.39           | 267.59 | 0.63                 | 161.16 | 4.80 | 0.76              | 49.91 | 1188.10 | 6.60  |
| z11UCCR04-108 | zircon  | 83.80   | 6.70     | 113.37  | 90.95    | 5.11           | 134.34 | 0.80                 | 43.73  | 2.74 | 0.71              | 40.86 | 1231.00 | 21.00 |
| z11UCCR04-110 | zircon  | 147.43  | 11.79    | 192.24  | 28.62    | 0.86           | 198.83 | 0.15                 | 121.07 | 4.47 | 0.76              | 47.32 | 1695.00 | 10.00 |
| z11UCCR04-112 | zircon  | 135.27  | 10.82    | 236.64  | 246.21   | 14.33          | 293.39 | 1.04                 | 146.45 | 1.83 | 0.68              | 35.77 | 433.80  | 4.90  |
| z11UCCR04-121 | zircon  | 220.01  | 17.60    | 71.83   | 31.46    | 0.63           | 79.08  | 0.44                 | 70.32  | 3.25 | 0.74              | 44.15 | 2722.10 | 8.00  |
|               |         |         |          |         |          |                |        |                      |        |      |                   |       |         |       |
| z11UCCF03-01  | zircon  | 162.38  | 12.99    | 132.09  | 50.89    | 1.18           | 143.81 | 0.39                 | 83.67  | 1.45 | 0.66              | 32.65 | 560.90  | 6.30  |
| z11UCCF03-02  | zircon  | 216.75  | 17.34    | 214.34  | 101.17   | 1.82           | 237.63 | 0.47                 | 180.54 | 1.33 | 0.64              | 31.10 | 630.50  | 8.20  |
| z11UCCF03-03  | zircon  | 291.53  | 23.32    | 35.74   | 10.85    | 0.39           | 38.24  | 0.30                 | 43.24  | 2.17 | 0.71              | 38.49 | 1044.00 | 12.00 |
| z11UCCF03-05  | zircon  | 296.47  | 23.72    | 296.64  | 64.35    | 1.14           | 311.45 | 0.22                 | 304.91 | 0.87 | 0.60              | 27.10 | 1737.80 | 6.20  |
| z11UCCF03-07  | zircon  | 138.98  | 11.12    | 120.58  | 53.54    | 0.30           | 132.91 | 0.44                 | 61.75  | 0.95 | 0.61              | 28.58 | 91.80   | 1.40  |
| z11UCCF03-10  | zircon  | 123.49  | 9.88     | 175.66  | 72.66    | 1.89           | 192.40 | 0.41                 | 86.39  | 2.03 | 0.67              | 33.96 | 85.60   | 3.20  |
| z11UCCF03-21  | zircon  | 142.44  | 11.40    | 189.92  | 72.03    | 1.31           | 206.51 | 0.38                 | 106.01 | 1.41 | 0.66              | 33.15 | 1084.00 | 12.00 |
| z11UCCF03-29  | zircon  | 574.47  | 45.96    | 142.73  | 74.60    | 1.73           | 159.91 | 0.52                 | 325.92 | 1.15 | 0.63              | 30.55 | 1013.60 | 7.30  |
| z11UCCF03-41  | zircon  | 291.72  | 23.34    | 199.42  | 89.09    | 0.67           | 219.93 | 0.45                 | 230.04 | 1.27 | 0.65              | 32.25 | 554.70  | 4.60  |
| z11UCCF03-43  | zircon  | 190.55  | 15.24    | 84.95   | 39.90    | 0.62           | 94.14  | 0.47                 | 67.51  | 1.83 | 0.69              | 36.58 | 581.20  | 8.70  |
| z11UCCF03-55  | zircon  | 92.89   | 7.43     | 344.15  | 117.86   | 0.49           | 371.28 | 0.34                 | 119.38 | 1.17 | 0.64              | 30.56 | 82.10   | 5.40  |
| z11UCCF03-58  | zircon  | 97.48   | 7.80     | 543.09  | 321.13   | 0.74           | 617.02 | 0.59                 | 203.50 | 0.97 | 0.62              | 29.55 | 93.80   | 1.10  |
| z11UCCF03-68  | zircon  | 236.36  | 18.91    | 102.48  | 28.10    | 0.83           | 108.96 | 0.27                 | 102.90 | 2.80 | 0.73              | 42.15 | 1000.00 | 8.80  |
| z11UCCF03-81  | zircon  | 391.53  | 31.32    | 134.38  | 50.14    | 0.38           | 145.93 | 0.37                 | 187.28 | 0.75 | 0.59              | 26.79 | 1991.00 | 24.00 |
| z11UCCF03-84  | zircon  | 259.60  | 20.77    | 230.83  | 39.16    | 2.11           | 239.86 | 0.17                 | 208.73 | 0.82 | 0.61              | 27.85 | 1834.20 | 6.90  |
| z11UCCF03-91  | zircon  | 403.01  | 32.24    | 404.56  | 123.46   | 1.18           | 432.98 | 0.31                 | 662.29 | 1.72 | 0.69              | 35.75 | 1229.40 | 9.50  |
| z11UCCF03-107 | zircon  | 220.94  | 17.68    | 106.65  | 36.22    | 0.96           | 114.99 | 0.34                 | 88.21  | 1.05 | 0.64              | 30.28 | 1774.00 | 10.00 |
| z11UCCF03-115 | zircon  | 86.85   | 6.95     | 457.72  | 233.20   | 0.51           | 511.40 | 0.51                 | 153.36 | 1.14 | 0.64              | 30.68 | 83.70   | 3.30  |
|               |         |         |          |         |          |                |        |                      |        |      |                   |       |         |       |
| z13EMERY-06   | zircon  | 189.48  | 15.16    | 176.43  | 85.15    | 7.68           | 196.07 | 0.48                 | 130.66 | 1.20 | 0.64              | 31.43 | 1645.00 | 16.00 |
| z13EMERY-10   | zircon  | 165.25  | 13.22    | 73.31   | 76.84    | 4.35           | 91.02  | 1.05                 | 51.89  | 1.18 | 0.63              | 30.87 | 1637.00 | 22.00 |
| z13EMERY-11   | zircon  | 163.21  | 13.06    | 186.05  | 38.27    | 8.33           | 194.91 | 0.21                 | 108.68 | 0.98 | 0.63              | 29.26 | 417.90  | 8.80  |
| z13EMERY-14   | zircon  | 236.33  | 18.91    | 164.87  | 112.89   | 4.62           | 190.88 | 0.68                 | 166.42 | 1.77 | 0.67              | 34.94 | 1022.00 | 13.00 |
| z13EMERY-16   | zircon  | 488.06  | 39.04    | 77.33   | 43.93    | 4.79           | 87.46  | 0.57                 | 150.46 | 1.07 | 0.63              | 30.56 | 1644.00 | 18.00 |
| z13EMERY-20   | zircon  | 347.70  | 27.82    | 133.20  | 25.11    | 2.77           | 138.99 | 0.19                 | 179.44 | 1.48 | 0.67              | 33.97 | 703.30  | 9.60  |
| z13EMERY-24   | zircon  | 113.07  | 9.05     | 220.42  | 116.16   | 2.91           | 247.18 | 0.53                 | 89.23  | 0.70 | 0.59              | 26.52 | 1958.00 | 21.00 |
| z13EMERY-26   | zircon  | 248.16  | 19.85    | 465.28  | 148.15   | 4.65           | 499.40 | 0.32                 | 389.96 | 0.66 | 0.58              | 25.29 | 1059.00 | 10.00 |
| z13EMERY-35   | zircon  | 384.33  | 30.75    | 215.57  | 76.63    | 15.98          | 233.30 | 0.36                 | 308.38 | 0.96 | 0.62              | 29.18 | 1429.00 | 18.00 |
| z13EMERY-38   | zircon  | 161.47  | 12.92    | 61.87   | 49.16    | 5.87           | 73.21  | 0.79                 | 39.03  | 0.87 | 0.61              | 28.26 | 1590.00 | 23.00 |
| z13EMERY-40   | zircon  | 246.30  | 19.70    | 64.43   | 40.25    | 4.29           | 73.72  | 0.62                 | 57.86  | 0.72 | 0.58              | 26.23 | 2110.00 | 17.00 |
| z13EMERY-42   | zircon  | 164.15  | 13.13    | 26.96   | 46.20    | 4.50           | 37.61  | 1.71                 | 21.03  | 1.14 | 0.62              | 30.43 | 2718.00 | 23.00 |
| z13EMERY-45   | zircon  | 197.23  | 15.78    | 60.47   | 34.72    | 1.98           | 68.47  | 0.57                 | 46.02  | 1.03 | 0.62              | 29.62 | 592.30  | 8.20  |
| z13EMERY-46   | zircon  | 155.67  | 12.45    | 199.02  | 71.84    | 7.68           | 215.59 | 0.36                 | 11     |      |                   |       |         |       |

|               |        |         |        |        |        |       |        |      |         |      |      |       |         |       |
|---------------|--------|---------|--------|--------|--------|-------|--------|------|---------|------|------|-------|---------|-------|
| z11UCCF04-12  | zircon | 86.33   | 6.91   | 223.13 | 131.49 | 0.92  | 253.40 | 0.59 | 70.83   | 0.85 | 0.60 | 27.30 | 88.40   | 1.30  |
| z11UCCF04-31  | zircon | 413.48  | 33.08  | 232.82 | 52.70  | 0.44  | 244.95 | 0.23 | 387.12  | 1.78 | 0.69 | 36.09 | 992.70  | 7.10  |
| z11UCCF04-33  | zircon | 76.45   | 6.12   | 205.77 | 98.17  | 0.42  | 228.38 | 0.48 | 62.39   | 1.60 | 0.66 | 32.98 | 91.60   | 1.30  |
| z11UCCF04-37  | zircon | 2924.42 | 233.95 | 67.62  | 34.21  | 0.92  | 75.50  | 0.51 | 1092.84 | 0.85 | 0.60 | 27.19 | 2850.70 | 8.30  |
| z11UCCF04-42  | zircon | 1049.69 | 83.98  | 24.71  | 7.99   | 0.24  | 26.55  | 0.32 | 99.88   | 0.94 | 0.62 | 28.80 | 2699.00 | 16.00 |
| z11UCCF04-43  | zircon | 967.81  | 77.42  | 32.93  | 24.05  | 28.95 | 38.61  | 0.73 | 148.60  | 1.85 | 0.69 | 36.77 | 1069.70 | 7.50  |
| z11UCCF04-44  | zircon | 296.22  | 23.70  | 154.18 | 145.05 | 2.31  | 187.58 | 0.94 | 181.63  | 1.01 | 0.59 | 27.55 | 421.90  | 3.70  |
| z11UCCF04-67  | zircon | 193.88  | 15.51  | 178.41 | 203.05 | 3.39  | 225.17 | 1.14 | 138.59  | 0.78 | 0.58 | 26.59 | 684.90  | 7.10  |
| z11UCCF04-76  | zircon | 205.45  | 16.44  | 211.66 | 80.20  | 1.21  | 230.13 | 0.38 | 160.02  | 0.91 | 0.62 | 28.94 | 461.30  | 4.60  |
| z11UCCF04-79  | zircon | 198.50  | 15.88  | 113.26 | 18.32  | 0.78  | 117.48 | 0.16 | 82.86   | 1.27 | 0.65 | 31.45 | 414.70  | 6.50  |
| z11UCCF04-80  | zircon | 250.72  | 20.06  | 30.40  | 32.08  | 0.71  | 37.79  | 1.06 | 32.30   | 1.08 | 0.62 | 29.92 | 2657.00 | 10.00 |
| z11UCCF04-90  | zircon | 151.45  | 12.12  | 87.86  | 30.24  | 1.49  | 94.83  | 0.34 | 53.13   | 1.63 | 0.68 | 35.08 | 1638.00 | 13.00 |
| z11UCCF04-97  | zircon | 100.32  | 8.03   | 0.52   | 0.58   | 0.10  | 0.66   | 1.11 | 0.23    | 1.08 | 0.63 | 30.76 | 1490.10 | 8.80  |
| z11UCCF04-101 | zircon | 145.05  | 11.60  | 39.24  | 22.72  | 1.01  | 44.48  | 0.58 | 22.48   | 1.31 | 0.64 | 31.15 | 1487.00 | 16.00 |
| z11UCCF04-106 | zircon | 268.57  | 21.49  | 230.07 | 114.83 | 3.69  | 256.52 | 0.50 | 242.03  | 1.17 | 0.64 | 31.09 | 612.10  | 9.30  |
| z11UCCF04-107 | zircon | 179.38  | 14.35  | 59.53  | 15.34  | 0.66  | 63.06  | 0.26 | 41.64   | 1.51 | 0.67 | 34.34 | 1773.00 | 14.00 |
| z11UCCF04-111 | zircon | 156.63  | 12.53  | 30.50  | 32.85  | 0.71  | 38.06  | 1.08 | 20.79   | 1.24 | 0.64 | 31.60 | 444.60  | 6.50  |
| z11UCCF04-118 | zircon | 629.34  | 50.35  | 24.90  | 31.27  | 1.02  | 32.10  | 1.26 | 70.21   | 1.08 | 0.62 | 29.95 | 1117.00 | 23.00 |

## Reduced (U-Th[Sm])/He Data

## Sunnyside Canyon

| Sample       | mineral | Age, Ma | err., Ma | U (ppm) | Th (ppm) | 147Sm (pp [U]e) | Th/U    | He (nmol/g mass (ug) | Ft     | ESR  | Final age 2 error |       |         |       |
|--------------|---------|---------|----------|---------|----------|-----------------|---------|----------------------|--------|------|-------------------|-------|---------|-------|
| z11USS01-1   | zircon  | 239.29  | 19.14    | 119.10  | 11.78    | 0.50            | 121.82  | 0.10                 | 118.50 | 4.61 | 0.74              | 43.79 | 428.40  | 5.20  |
| z11USS01-4   | zircon  | 133.55  | 10.68    | 786.08  | 947.37   | 6.67            | 1004.20 | 1.21                 | 538.44 | 4.49 | 0.73              | 44.88 | 382.00  | 12.00 |
| z11USS01-6   | zircon  | 291.32  | 23.31    | 26.58   | 17.01    | 0.80            | 30.50   | 0.64                 | 36.49  | 3.74 | 0.75              | 46.02 | 546.10  | 8.70  |
| z11USS01-8   | zircon  | 336.87  | 26.95    | 78.76   | 50.14    | 0.46            | 90.30   | 0.64                 | 123.77 | 3.28 | 0.74              | 44.30 | 1853.00 | 12.00 |
| z11USS01-13  | zircon  | 373.56  | 29.88    | 50.22   | 29.85    | 2.21            | 57.10   | 0.59                 | 87.07  | 3.45 | 0.74              | 44.30 | 566.50  | 9.10  |
| z11USS01-14  | zircon  | 323.81  | 25.91    | 38.08   | 12.91    | 0.77            | 41.05   | 0.34                 | 59.05  | 8.12 | 0.80              | 59.90 | 974.00  | 19.00 |
| z11USS01-15  | zircon  | 230.91  | 18.47    | 69.21   | 22.54    | 0.38            | 74.40   | 0.33                 | 70.70  | 3.93 | 0.75              | 46.34 | 1925.00 | 16.00 |
| z11USS01-17  | zircon  | 68.86   | 5.51     | 435.07  | 135.26   | 1.30            | 466.21  | 0.31                 | 129.65 | 4.25 | 0.75              | 45.21 | 87.40   | 4.00  |
| z11USS01-19  | zircon  | 183.35  | 14.67    | 311.73  | 39.69    | 0.62            | 320.87  | 0.13                 | 238.35 | 3.31 | 0.74              | 44.00 | 1005.00 | 11.00 |
| z11USS01-20  | zircon  | 152.71  | 12.22    | 161.61  | 56.18    | 0.82            | 174.54  | 0.35                 | 106.28 | 3.09 | 0.73              | 42.79 | 1090.00 | 18.00 |
| z11USS01-21  | zircon  | 381.32  | 30.51    | 67.52   | 38.37    | 1.34            | 76.36   | 0.57                 | 114.10 | 2.41 | 0.71              | 39.42 | 1655.50 | 9.50  |
| z11USS01-25  | zircon  | 196.78  | 15.74    | 367.52  | 178.24   | 1.62            | 408.55  | 0.48                 | 341.37 | 5.70 | 0.78              | 52.46 | 433.60  | 3.80  |
| z11USS01-28  | zircon  | 122.83  | 9.83     | 127.28  | 67.06    | 0.66            | 142.72  | 0.53                 | 71.74  | 4.18 | 0.75              | 47.06 | 1627.30 | 9.90  |
| z11USS01-35  | zircon  | 90.22   | 7.22     | 280.23  | 113.62   | 0.61            | 306.39  | 0.41                 | 114.24 | 5.05 | 0.76              | 48.78 | 96.60   | 1.40  |
| z11USS01-37  | zircon  | 125.40  | 10.03    | 524.04  | 224.83   | 1.44            | 575.80  | 0.43                 | 292.71 | 4.48 | 0.74              | 45.45 | 153.00  | 7.30  |
| z11USS01-38  | zircon  | 186.48  | 14.92    | 40.05   | 24.57    | 0.43            | 45.71   | 0.61                 | 36.55  | 6.20 | 0.78              | 54.80 | 2700.20 | 7.40  |
| z11USS01-40  | zircon  | 552.61  | 44.21    | 65.94   | 23.28    | 0.53            | 71.30   | 0.35                 | 177.67 | 8.48 | 0.80              | 58.85 | 1801.00 | 14.00 |
| z11USS01-44  | zircon  | 116.48  | 9.32     | 89.77   | 55.85    | 1.33            | 102.63  | 0.62                 | 46.90  | 2.85 | 0.72              | 41.57 | 1131.00 | 11.00 |
| z11USS01-45  | zircon  | 206.54  | 16.52    | 178.98  | 97.58    | 1.15            | 201.45  | 0.55                 | 169.27 | 3.79 | 0.74              | 45.38 | 1034.00 | 21.00 |
| z11USS01-47  | zircon  | 84.72   | 6.78     | 231.40  | 117.74   | 0.62            | 258.50  | 0.51                 | 92.66  | 6.12 | 0.78              | 53.36 | 84.80   | 2.00  |
| z11USS01-48  | zircon  | 221.70  | 17.74    | 719.92  | 455.02   | 2.60            | 824.67  | 0.63                 | 731.65 | 3.51 | 0.73              | 43.17 | 236.00  | 5.60  |
| z11USS01-49  | zircon  | 207.28  | 16.58    | 202.21  | 60.13    | 1.54            | 216.06  | 0.30                 | 173.15 | 2.39 | 0.71              | 38.73 | 391.00  | 13.00 |
| z11USS01-58  | zircon  | 146.51  | 11.72    | 95.71   | 30.05    | 1.03            | 102.64  | 0.31                 | 59.06  | 3.35 | 0.72              | 40.94 | 1688.00 | 14.00 |
| z11USS01-74  | zircon  | 558.74  | 44.70    | 203.98  | 60.65    | 2.93            | 217.95  | 0.30                 | 514.35 | 3.99 | 0.75              | 46.31 | 1835.00 | 16.00 |
| z11USS01-76  | zircon  | 203.72  | 16.30    | 336.13  | 148.73   | 1.58            | 370.38  | 0.44                 | 286.21 | 2.26 | 0.69              | 37.18 | 556.00  | 10.00 |
| z11USS01-83  | zircon  | 299.56  | 23.97    | 51.57   | 11.50    | 0.24            | 54.21   | 0.22                 | 66.30  | 3.28 | 0.74              | 44.19 | 2739.00 | 25.00 |
| z11USS01-87  | zircon  | 86.99   | 6.96     | 290.12  | 118.97   | 1.15            | 317.52  | 0.41                 | 111.83 | 4.51 | 0.75              | 45.62 | 95.10   | 1.40  |
| z11USS01-93  | zircon  | 91.29   | 7.30     | 522.75  | 228.17   | 1.27            | 575.28  | 0.44                 | 205.18 | 3.18 | 0.72              | 41.00 | 92.40   | 1.80  |
| z11USS01-104 | zircon  | 80.01   | 6.40     | 545.28  | 232.38   | 0.78            | 598.77  | 0.43                 | 186.83 | 3.01 | 0.72              | 40.85 | 89.00   | 1.40  |
| z11USS01-114 | zircon  | 437.03  | 34.96    | 71.31   | 38.04    | 1.00            | 80.07   | 0.53                 | 142.24 | 3.37 | 0.73              | 43.06 | 1488.00 | 8.40  |
| z11USS01-115 | zircon  | 137.12  | 10.97    | 126.85  | 22.08    | 0.99            | 131.94  | 0.17                 | 72.18  | 3.16 | 0.73              | 42.56 | 1456.00 | 14.00 |
| z11USS01-122 | zircon  | 98.66   | 7.89     | 257.65  | 78.13    | 0.52            | 275.64  | 0.30                 | 116.40 | 8.46 | 0.79              | 55.15 | 97.40   | 1.30  |
| z11USS02-16  | zircon  | 90.82   | 7.27     | 163.63  | 58.04    | 0.86            | 176.99  | 0.35                 | 64.02  | 3.29 | 0.73              | 43.19 | 1170.00 | 10.00 |
| z11USS02-19  | zircon  | 560.53  | 44.84    | 78.78   | 46.76    | 1.15            | 89.55   | 0.59                 | 198.83 | 2.45 | 0.71              | 39.26 | 1706.00 | 10.00 |
| z11USS02-20  | zircon  | 143.16  | 11.45    | 82.78   | 59.62    | 1.15            | 96.51   | 0.72                 | 51.55  | 1.99 | 0.68              | 36.42 | 2774.80 | 6.30  |
| z11USS02-21  | zircon  | 303.75  | 24.30    | 98.56   | 36.58    | 1.35            | 106.98  | 0.37                 | 131.40 | 3.33 | 0.73              | 43.28 | 1139.00 | 14.00 |
| z11USS02-29  | zircon  | 130.62  | 10.45    | 184.07  | 180.90   | 1.84            | 225.73  | 0.98                 | 121.29 | 4.49 | 0.75              | 48.33 | 1649.40 | 9.50  |
| z11USS02-31  | zircon  | 152.02  | 12.16    | 217.59  | 65.60    | 1.42            | 232.69  | 0.30                 | 141.17 | 3.09 | 0.73              | 42.79 | 427.30  | 3.00  |
| z11USS02-37  | zircon  | 219.49  | 17.56    | 207.19  | 46.26    | 1.27            | 217.85  | 0.22                 | 196.31 | 3.78 | 0.75              | 45.83 | 1733.00 | 5.90  |
| z11USS02-42  | zircon  | 232.10  | 18.57    | 129.24  | 34.72    | 0.68            | 137.24  | 0.27                 | 130.28 | 3.69 | 0.75              | 45.28 | 1698.00 | 5.80  |
| z11USS02-44  | zircon  | 152.13  | 12.17    | 109.41  | 88.97    | 0.87            | 129.89  | 0.81                 | 68.60  | 1.20 | 0.64              | 31.13 | 1590.50 | 9.70  |
| z11USS02-45  | zircon  | 246.49  | 19.72    | 164.21  | 132.85   | 1.10            | 194.80  | 0.81                 | 189.42 | 2.75 | 0.72              | 41.47 | 2684.40 | 6.40  |
| z11USS02-56  | zircon  | 295.06  | 23.60    | 127.15  | 93.51    | 1.61            | 148.68  | 0.74                 | 159.48 | 1.42 | 0.66              | 33.60 | 1715.50 | 7.90  |
| z11USS02-64  | zircon  | 220.92  | 17.67    | 229.04  | 37.83    | 1.34            | 237.76  | 0.17                 | 218.91 | 4.22 | 0.76              | 47.95 | 423.50  | 3.50  |
| z11USS02-72  | zircon  | 83.10   | 6.65     | 253.11  | 107.49   | 0.46            | 277.86  | 0.42                 | 95.50  | 5.26 | 0.76              | 49.03 | 90.20   | 1.20  |
| z11USS02-73  | zircon  | 122.81  | 9.82     | 265.17  | 107.86   | 0.79            | 290.00  | 0.41                 | 142.96 | 3.54 | 0.74              | 44.05 | 437.20  | 7.20  |
| z11USS02-74  | zircon  | 185.38  | 14.83    | 31.88   | 20.33    | 0.53            | 36.56   | 0.64                 | 27.45  | 3.77 | 0.74              | 45.09 | 2807.00 | 13.00 |
| z11USS02-75  | zircon  | 182.44  | 14.60    | 271.27  | 31.57    | 1.28            | 278.54  | 0.12                 | 194.41 | 2.04 | 0.70              | 37.35 | 430.90  | 5.30  |
| z11USS02-77  | zircon  | 220.02  | 17.60    | 84.49   | 78.22    | 2.13            | 102.50  | 0.93                 | 86.17  | 2.35 | 0.70              | 38.39 | 1140.00 | 18.00 |
| z11USS02-79  | zircon  | 242.75  | 19.42    | 106.13  | 73.31    | 0.79            | 123.01  | 0.69                 | 119.59 | 3.54 | 0.73              | 43.17 | 1146.00 | 13.00 |
| z11USS02-84  | zircon  | 390.50  | 31.24    | 141.11  | 52.50    | 1.49            | 153.21  | 0.37                 | 250.36 | 4.00 | 0.75              | 47.19 | 1979.50 | 6.00  |
| z11USS02-87  | zircon  | 450.99  | 36.08    | 59.42   | 49.16    | 0.69            | 70.74   | 0.83                 | 132.14 | 3.78 | 0.74              | 45.92 | 3464.20 | 6.80  |
| z11USS02-88  | zircon  | 310.16  | 24.81    | 93.69   | 75.76    | 1.19            | 111.14  | 0.81                 | 135.64 | 2.71 | 0.71              | 40.72 | 1051.00 | 10.00 |
| z11USS02-92  | zircon  | 108.46  | 8.68     | 352.04  | 72.86    | 0.84            | 368.82  | 0.21                 | 155.24 | 2.36 | 0.71              | 39.62 | 2505.30 | 3.90  |
| z11USS02-99  | zircon  | 132.35  | 10.59    | 167.79  | 36.40    | 0.69            | 176.17  | 0.22                 | 92.87  | 2.86 | 0.73              | 42.51 | 1781.80 | 6.40  |
| z11USS02-101 | zircon  | 159.49  | 12.76    | 163.82  | 81.56    | 0.63            | 182.60  | 0.50                 | 110.64 | 2.16 | 0.70              | 37.69 | 2035.00 | 7.30  |
| z11USS02-102 | zircon  | 197.60  | 15.81    | 28.00   | 33.23    | 0.49            | 35.65   | 1.19                 | 27.99  | 3.17 | 0.72              | 43.03 | 2750.00 | 25.00 |
| z11USS02-103 | zircon  | 598.43  | 47.87    | 98.50   | 54.58    | 1.29            | 111.07  | 0.55                 | 260.58 | 2.11 | 0.70              | 37.91 | 1650.00 | 11.00 |
| z11USS02-104 | zircon  | 291.61  | 23.33    | 205.72  | 73.82    | 1.33            | 222.72  | 0.36                 | 263.11 | 3.37 | 0.74              | 43.61 | 1721.00 | 7.10  |
| z11USS02-105 | zircon  | 669.75  | 53.58    | 45.86   | 24.70    | 2.00            | 51.56   | 0.54                 | 138.95 | 2.56 | 0.71              | 39.90 | 1137.20 | 9.70  |
| z11USS02-106 | zircon  | 236.79  | 18.94    | 110.72  | 95.22    | 1.09            | 132.64  | 0.86                 | 123.86 | 3.05 | 0.72              | 41.56 | 1949.00 | 12.00 |
| z11USS02-110 | zircon  | 165.58  | 13.25    | 96.86   | 79.31    | 0.99            | 115.13  | 0.82                 | 77.59  | 3.79 | 0.74              | 46.22 | 1634.50 | 8.20  |
| z11USS04-01  | zircon  | 406.90  | 32.55    | 245.11  | 33.21    | 12.88           | 252.82  | 0.14                 | 374.69 | 1.37 | 0.66              | 32.11 | 436.70  | 7.30  |
| z11USS04-04  | zircon  | 86.97   | 6.96     | 97.35   | 26.40    | 2.95            | 103.44  | 0.27                 | 33.62  | 1.76 | 0.69              | 36.17 | 1776.00 | 20.00 |
| z11USS04-07  | zircon  | 190.74  | 15.26    | 298.76  | 129.76   | 5.45            | 328.66  | 0.43                 | 226.18 | 1.53 | 0.66              | 33.11 | 1594.00 | 16.00 |
| z11USS04-10  | zircon  | 193.76  | 15.50    | 120.13  | 34.42    | 1.67            | 128.06  | 0.29                 | 92.39  | 1.86 | 0.68              | 35.28 | 1868.00 | 15.00 |
| z11USS04-14  | zircon  | 629.39  | 50.35    | 66.88   | 49.84    | 1.04            | 78.36   | 0.75                 | 167.52 | 1.00 | 0.61              | 28.31 | 398.80  | 5.60  |
| z11USS04-17  | zircon  | 732.20  | 58.58    | 18.     |          |                 |         |                      |        |      |                   |       |         |       |

|              |        |         |       |        |        |        |        |      |        |      |      |       |         |       |
|--------------|--------|---------|-------|--------|--------|--------|--------|------|--------|------|------|-------|---------|-------|
| z11USS04-118 | zircon | 311.49  | 24.92 | 304.93 | 47.86  | 3.82   | 315.96 | 0.16 | 346.61 | 1.09 | 0.64 | 30.40 | 1954.00 | 24.00 |
| z11USS04-121 | zircon | 559.04  | 44.72 | 72.03  | 32.30  | 1.65   | 79.48  | 0.45 | 157.87 | 1.26 | 0.64 | 30.57 | 1491.00 | 18.00 |
| z11USS05-1   | zircon | 130.93  | 10.47 | 361.57 | 98.93  | 0.75   | 384.35 | 0.27 | 197.13 | 3.26 | 0.72 | 40.66 | 163.20  | 2.30  |
| z11USS05-8   | zircon | 152.10  | 12.17 | 176.49 | 65.53  | 0.77   | 191.58 | 0.37 | 101.22 | 1.15 | 0.64 | 30.62 | 369.20  | 3.90  |
| z11USS05-10  | zircon | 176.59  | 14.13 | 254.88 | 96.33  | 1.55   | 277.06 | 0.38 | 174.88 | 1.44 | 0.66 | 32.41 | 1357.50 | 6.20  |
| z11USS05-12  | zircon | 159.10  | 12.73 | 221.12 | 142.07 | 2.34   | 253.84 | 0.64 | 138.70 | 1.09 | 0.63 | 30.28 | 1082.40 | 6.00  |
| z11USS05-13  | zircon | 293.01  | 23.44 | 167.97 | 86.12  | 0.48   | 187.80 | 0.51 | 214.70 | 2.76 | 0.71 | 39.50 | 1584.00 | 14.00 |
| z11USS05-25  | zircon | 89.66   | 7.17  | 122.19 | 68.61  | 1.15   | 137.99 | 0.56 | 48.39  | 2.70 | 0.72 | 41.31 | 95.30   | 1.70  |
| z11USS05-27  | zircon | 83.44   | 6.68  | 320.58 | 127.94 | 1.54   | 350.04 | 0.40 | 109.36 | 2.53 | 0.69 | 36.61 | 96.90   | 2.00  |
| z11USS05-29  | zircon | 282.17  | 22.57 | 498.86 | 37.45  | 2.95   | 507.50 | 0.08 | 525.66 | 1.43 | 0.67 | 33.10 | 393.70  | 3.80  |
| z11USS05-39  | zircon | 577.70  | 46.22 | 87.30  | 37.12  | 0.55   | 95.85  | 0.43 | 228.21 | 3.45 | 0.73 | 43.19 | 1403.00 | 11.00 |
| z11USS05-41  | zircon | 127.19  | 10.18 | 110.53 | 12.90  | 0.44   | 113.50 | 0.12 | 55.62  | 2.25 | 0.71 | 38.43 | 961.00  | 16.00 |
| z11USS05-46  | zircon | 86.97   | 6.96  | 113.18 | 34.14  | 0.48   | 121.04 | 0.30 | 37.87  | 1.83 | 0.66 | 33.13 | 76.90   | 1.50  |
| z11USS05-54  | zircon | 93.21   | 7.46  | 242.52 | 135.81 | 0.69   | 273.79 | 0.56 | 97.55  | 2.27 | 0.70 | 38.80 | 89.30   | 1.00  |
| z11USS05-55  | zircon | 237.78  | 19.02 | 247.38 | 28.42  | 1.93   | 253.93 | 0.11 | 229.63 | 2.13 | 0.69 | 36.42 | 396.50  | 4.70  |
| z11USS05-59  | zircon | 799.53  | 63.96 | 60.02  | 22.01  | 0.57   | 65.09  | 0.37 | 211.46 | 2.31 | 0.71 | 39.38 | 1874.20 | 7.70  |
| z11USS05-63  | zircon | 106.44  | 8.52  | 148.95 | 49.04  | 1.20   | 160.25 | 0.33 | 63.37  | 1.75 | 0.68 | 35.65 | 1781.80 | 6.60  |
| z11USS05-66  | zircon | 441.08  | 35.29 | 164.43 | 40.52  | 1.28   | 173.76 | 0.25 | 307.26 | 2.51 | 0.72 | 40.68 | 2720.80 | 9.40  |
| z11USS05-73  | zircon | 83.50   | 6.68  | 202.66 | 104.17 | 1.47   | 226.65 | 0.51 | 71.63  | 2.26 | 0.70 | 37.81 | 95.60   | 1.50  |
| z11USS05-89  | zircon | 92.96   | 7.44  | 451.68 | 183.70 | 1.21   | 493.97 | 0.41 | 193.51 | 6.06 | 0.78 | 52.25 | 74.80   | 5.90  |
| z11USS05-92  | zircon | 188.72  | 15.10 | 59.14  | 40.01  | 0.77   | 68.36  | 0.68 | 46.28  | 1.57 | 0.66 | 33.04 | 1938.50 | 8.30  |
| z11USS05-93  | zircon | 529.44  | 42.36 | 100.69 | 51.76  | 0.33   | 112.61 | 0.51 | 242.65 | 3.04 | 0.73 | 42.33 | 426.40  | 3.90  |
| z11USS05-96  | zircon | 95.21   | 7.62  | 452.95 | 248.30 | 0.74   | 510.11 | 0.55 | 184.36 | 2.41 | 0.70 | 38.07 | 88.50   | 2.20  |
| z11USS05-109 | zircon | 248.47  | 19.88 | 269.44 | 99.28  | 1.00   | 292.30 | 0.37 | 301.08 | 4.45 | 0.75 | 47.37 | 2652.00 | 13.00 |
| z11USS05-111 | zircon | 256.91  | 20.55 | 75.93  | 66.54  | 1.38   | 91.25  | 0.88 | 84.72  | 1.52 | 0.66 | 33.48 | 1653.00 | 11.00 |
| z11USS05-117 | zircon | 252.64  | 20.21 | 31.39  | 39.73  | 1.25   | 40.54  | 1.27 | 39.68  | 2.75 | 0.70 | 39.83 | 1338.00 | 20.00 |
| z11USS05-120 | zircon | 87.78   | 7.02  | 173.99 | 54.52  | 3.21   | 186.55 | 0.31 | 55.39  | 0.97 | 0.62 | 29.17 | 2431.00 | 10.00 |
| z11USS06-03  | zircon | 118.97  | 9.52  | 84.08  | 73.33  | 5.34   | 100.99 | 0.87 | 39.84  | 0.92 | 0.61 | 28.66 | 2739.00 | 30.00 |
| z11USS06-14  | zircon | 86.24   | 6.90  | 81.58  | 50.42  | 1.92   | 93.19  | 0.62 | 27.68  | 1.10 | 0.63 | 30.66 | 1632.00 | 17.00 |
| z11USS06-18  | zircon | 181.04  | 14.48 | 92.16  | 33.51  | 1.49   | 99.88  | 0.36 | 63.95  | 1.41 | 0.65 | 31.64 | 1513.00 | 15.00 |
| z11USS06-19  | zircon | 148.77  | 11.90 | 152.52 | 44.40  | 3.92   | 162.76 | 0.29 | 81.90  | 1.08 | 0.62 | 28.93 | 1726.00 | 17.00 |
| z11USS06-20  | zircon | 233.10  | 18.65 | 333.70 | 117.72 | 7.93   | 360.83 | 0.35 | 290.61 | 1.15 | 0.63 | 29.96 | 356.20  | 5.00  |
| z11USS06-21  | zircon | 281.78  | 22.54 | 127.13 | 65.89  | -20.75 | 142.20 | 0.52 | 147.36 | 1.77 | 0.67 | 34.29 | 631.40  | 5.90  |
| z11USS06-30  | zircon | 116.72  | 9.34  | 154.17 | 137.57 | -29.48 | 185.69 | 0.89 | 74.36  | 1.14 | 0.63 | 30.62 | 1655.00 | 15.00 |
| z11USS06-46  | zircon | 100.42  | 8.03  | 347.82 | 32.85  | -24.45 | 355.26 | 0.09 | 131.43 | 1.55 | 0.68 | 34.42 | 1302.00 | 44.00 |
| z11USS06-47  | zircon | 160.47  | 12.84 | 363.21 | 34.37  | -48.37 | 370.88 | 0.09 | 183.84 | 0.74 | 0.57 | 24.31 | 558.30  | 4.50  |
| z11USS06-48  | zircon | 96.87   | 7.75  | 43.27  | 10.08  | -39.17 | 45.39  | 0.23 | 14.90  | 1.00 | 0.63 | 29.25 | 1087.00 | 12.00 |
| z11USS06-52  | zircon | 104.85  | 8.39  | 50.79  | 45.52  | -39.90 | 61.07  | 0.90 | 20.73  | 0.92 | 0.60 | 27.62 | 1149.00 | 19.00 |
| z11USS06-61  | zircon | 178.99  | 14.32 | 183.51 | 16.98  | -41.04 | 187.21 | 0.09 | 112.42 | 0.92 | 0.62 | 27.98 | 907.00  | 22.00 |
| z11USS06-63  | zircon | 89.79   | 7.18  | 199.11 | 55.90  | -40.67 | 211.77 | 0.28 | 62.55  | 0.88 | 0.61 | 27.65 | 1873.00 | 18.00 |
| z11USS06-68  | zircon | 72.72   | 5.82  | 127.38 | 100.80 | -23.48 | 150.47 | 0.79 | 38.64  | 1.62 | 0.65 | 32.55 | 76.40   | 2.40  |
| z11USS06-69  | zircon | 194.70  | 15.58 | 31.27  | 55.92  | -15.06 | 44.07  | 1.79 | 31.37  | 1.78 | 0.67 | 35.22 | 1821.00 | 23.00 |
| z11USS06-71  | zircon | 86.62   | 6.93  | 100.19 | 46.28  | -44.91 | 110.62 | 0.46 | 31.84  | 0.89 | 0.61 | 28.51 | 1521.00 | 16.00 |
| z11USS06-72  | zircon | 223.94  | 17.92 | 120.01 | 103.95 | -30.88 | 143.79 | 0.87 | 110.42 | 1.23 | 0.63 | 30.24 | 1139.50 | 7.20  |
| z11USS06-82  | zircon | 106.07  | 8.49  | 41.11  | 21.52  | 31.52  | 46.22  | 0.52 | 16.53  | 1.00 | 0.62 | 29.14 | 1424.00 | 18.00 |
| z11USS06-120 | zircon | 137.64  | 11.01 | 319.31 | 194.79 | -21.94 | 364.04 | 0.61 | 174.90 | 1.17 | 0.64 | 31.33 | 480.70  | 3.30  |
| z11USS07-1   | zircon | 844.63  | 67.57 | 52.76  | 36.28  | 1.56   | 61.12  | 0.69 | 228.91 | 5.92 | 0.77 | 51.19 | 1442.00 | 12.00 |
| z11USS07-10  | zircon | 133.31  | 10.66 | 131.67 | 60.93  | 1.53   | 145.71 | 0.46 | 78.31  | 3.86 | 0.74 | 44.65 | 1093.50 | 9.70  |
| z11USS07-11  | zircon | 314.39  | 25.15 | 287.07 | 98.56  | 4.64   | 309.78 | 0.34 | 387.70 | 2.61 | 0.72 | 41.21 | 1912.00 | 10.00 |
| z11USS07-14  | zircon | 127.39  | 10.19 | 438.97 | 289.56 | 3.75   | 505.65 | 0.66 | 225.06 | 1.46 | 0.64 | 31.47 | 1431.80 | 6.50  |
| z11USS07-16  | zircon | 75.16   | 6.01  | 248.66 | 213.98 | 1.12   | 297.93 | 0.86 | 83.61  | 2.24 | 0.69 | 36.97 | 75.40   | 1.20  |
| z11USS07-18  | zircon | 628.20  | 50.26 | 60.41  | 41.65  | 1.50   | 70.01  | 0.69 | 192.61 | 5.46 | 0.77 | 52.40 | 2061.00 | 7.20  |
| z11USS07-19  | zircon | 327.56  | 26.20 | 52.77  | 37.81  | 0.87   | 61.48  | 0.72 | 83.40  | 4.07 | 0.75 | 47.03 | 557.50  | 6.30  |
| z11USS07-25  | zircon | 1179.95 | 94.40 | 79.40  | 31.59  | 1.29   | 86.68  | 0.40 | 454.15 | 4.14 | 0.74 | 45.24 | 1426.00 | 13.00 |
| z11USS07-28  | zircon | 277.02  | 22.16 | 97.78  | 90.91  | 1.92   | 118.72 | 0.93 | 128.38 | 2.59 | 0.71 | 40.21 | 2652.70 | 4.60  |
| z11USS07-33  | zircon | 128.56  | 10.28 | 229.61 | 72.03  | 1.36   | 246.20 | 0.31 | 133.41 | 5.66 | 0.77 | 51.60 | 1771.70 | 7.50  |
| z11USS07-34  | zircon | 136.15  | 10.89 | 112.11 | 63.79  | 2.87   | 126.81 | 0.57 | 68.31  | 3.11 | 0.73 | 42.35 | 1466.00 | 10.00 |
| z11USS07-35  | zircon | 101.68  | 8.13  | 132.06 | 40.19  | 1.03   | 141.32 | 0.30 | 59.37  | 4.70 | 0.76 | 48.36 | 1091.00 | 11.00 |
| z11USS07-36  | zircon | 486.94  | 38.96 | 43.97  | 17.87  | 1.01   | 48.09  | 0.41 | 93.15  | 2.68 | 0.71 | 39.88 | 1452.00 | 17.00 |
| z11USS07-37  | zircon | 120.75  | 9.66  | 287.46 | 138.58 | 6.65   | 319.39 | 0.48 | 157.72 | 4.28 | 0.75 | 46.88 | 1820.00 | 15.00 |
| z11USS07-40  | zircon | 276.30  | 22.10 | 95.21  | 55.95  | 0.79   | 108.09 | 0.59 | 121.70 | 3.42 | 0.74 | 45.00 | 1119.20 | 7.20  |
| z11USS07-43  | zircon | 261.23  | 20.90 | 45.62  | 23.80  | 0.73   | 51.10  | 0.52 | 56.82  | 5.55 | 0.77 | 52.07 | 1843.80 | 8.70  |
| z11USS07-45  | zircon | 75.28   | 6.02  | 82.53  | 44.40  | 0.32   | 92.75  | 0.54 | 27.25  | 2.85 | 0.72 | 41.17 | 73.50   | 1.20  |
| z11USS07-53  | zircon | 680.30  | 54.42 | 6.30   | 7.11   | 1.90   | 7.94   | 1.13 | 22.40  | 3.88 | 0.73 | 44.12 | 1069.00 | 14.00 |
| z11USS07-61  | zircon | 158.57  | 12.69 | 157.39 | 109.69 | 1.19   | 182.65 | 0.70 | 121.59 | 5.33 | 0.77 | 51.18 | 2453.90 | 9.90  |
| z11USS07-66  | zircon | 388.07  | 31.05 | 42.93  | 37.20  | 0.60   | 51.49  | 0.87 | 86.50  | 6.58 | 0.78 | 54.15 | 1842.00 | 12.00 |
| z11USS07-69  | zircon | 117.25  | 9.38  | 84.41  | 24.41  | 0.97   | 90.03  | 0.29 | 44.86  | 7.36 | 0.78 | 53.27 | 1069.90 | 9.20  |
| z11USS07-81  | zircon | 364.74  | 29.18 | 56.70  | 39.65  | 1.01   | 65.83  | 0.70 | 101.83 | 4.93 | 0.76 | 50.40 | 1490.00 | 14.00 |
| z11USS07-83  | zircon | 117.61  | 9.41  | 107.15 | 43.47  | 0.74   | 117.16 | 0.41 | 55.36  | 3.36 | 0.74 | 44.21 | 1745.10 | 6.00  |
| z11USS07-87  | zircon | 492.25  | 39.38 | 26.06  | 22.22  | 0.89   | 31.18  | 0.85 | 64.32  | 3.94 | 0.75 | 47.21 | 2071.00 | 10.00 |
| z11USS07-89  | zircon | 152.14  | 12.17 | 75.96  | 39.54  | 0.63   | 85.06  | 0.52 | 52.55  | 3.59 | 0.74 | 45.59 | 2930.20 | 8.20  |
| z11USS07-100 | zircon | 299.74  | 23.98 | 38.18  | 34.61  | 0.99   | 46.15  | 0.91 | 58.61  | 5.26 | 0.77 | 51.33 | 1929.80 | 8.90  |
| z11USS07-102 | zircon | 63.24   | 5.06  | 124.46 | 76.80  | 0.62   | 142.15 | 0.62 | 33.48  | 1.99 | 0.69 | 36.57 | 75.40   | 1.50  |
| z11USS07-104 | zircon | 184.25  | 14.74 | 180.77 | 75.55  | 1.31   | 198.17 | 0.42 | 146.99 | 4.06 | 0.74 | 43.91 | 1084.00 | 11.00 |
| z11USS07-110 | zircon | 205.62  | 16.45 | 163.82 | 95.02  | 2.14   | 185.70 | 0.58 | 158.89 | 4.40 | 0.76 | 48.89 | 1875.00 | 25.00 |

## Reduced (U-Th[Sm])/He Data

## Green River

| Sample          | mineral | Age, Ma | err., Ma | U (ppm) | Th (ppm) | 147Sm (pp [U]e) | Th/U   | He (nmol/g mass (ug) | Ft     | ESR   | Final age 2 error |       |         |       |
|-----------------|---------|---------|----------|---------|----------|-----------------|--------|----------------------|--------|-------|-------------------|-------|---------|-------|
| zBluecastle-06  | zircon  | 171.57  | 13.73    | 87.02   | 38.75    | 6.00            | 95.97  | 0.45                 | 67.41  | 3.77  | 0.75              | 46.43 | 1023.50 | 8.20  |
| zBluecastle-07  | zircon  | 73.50   | 5.88     | 260.68  | 48.73    | 1.92            | 271.91 | 0.19                 | 77.86  | 2.43  | 0.72              | 40.26 | 1685.00 | 23.00 |
| zBluecastle-11  | zircon  | 345.17  | 27.61    | 306.85  | 210.80   | 2.65            | 355.39 | 0.69                 | 489.95 | 3.11  | 0.72              | 41.99 | 329.20  | 6.20  |
| zBluecastle-15  | zircon  | 77.61   | 6.21     | 367.61  | 166.20   | 1.50            | 405.88 | 0.45                 | 129.01 | 7.34  | 0.75              | 47.52 | 68.00   | 1.50  |
| zBluecastle-18  | zircon  | 214.44  | 17.16    | 114.61  | 59.39    | -3.21           | 128.26 | 0.52                 | 113.83 | 4.52  | 0.76              | 47.83 | 1427.00 | 35.00 |
| zBluecastle-19  | zircon  | 505.48  | 40.44    | 114.57  | 35.87    | 0.79            | 122.83 | 0.31                 | 260.36 | 3.80  | 0.75              | 45.96 | 1027.00 | 16.00 |
| zBluecastle-23  | zircon  | 155.57  | 12.45    | 204.95  | 125.79   | 36.41           | 234.09 | 0.61                 | 146.12 | 3.62  | 0.73              | 43.99 | 1784.00 | 16.00 |
| zBluecastle-25  | zircon  | 268.39  | 21.47    | 119.47  | 86.42    | 0.72            | 139.37 | 0.72                 | 145.97 | 2.66  | 0.71              | 40.01 | 616.00  | 6.30  |
| zBluecastle-26  | zircon  | 284.31  | 22.74    | 134.68  | 57.94    | 0.91            | 148.02 | 0.43                 | 176.69 | 5.13  | 0.76              | 49.15 | 301.10  | 4.10  |
| zBluecastle-30  | zircon  | 73.36   | 5.87     | 105.38  | 69.23    | 2.54            | 121.33 | 0.66                 | 36.87  | 5.84  | 0.76              | 49.75 | 67.00   | 1.70  |
| zBluecastle-44  | zircon  | 79.11   | 6.33     | 420.53  | 108.15   | 42.24           | 445.63 | 0.26                 | 151.09 | 7.73  | 0.79              | 55.56 | 343.90  | 3.50  |
| zBluecastle-47  | zircon  | 244.47  | 19.56    | 44.49   | 44.82    | 0.65            | 54.81  | 1.01                 | 57.11  | 5.62  | 0.77              | 53.26 | 1793.00 | 15.00 |
| zBluecastle-52  | zircon  | 390.06  | 31.20    | 197.33  | 34.26    | -0.23           | 205.22 | 0.17                 | 334.83 | 4.84  | 0.75              | 46.50 | 461.30  | 9.70  |
| zBluecastle-57  | zircon  | 144.66  | 11.57    | 79.39   | 136.15   | 1.76            | 110.74 | 1.72                 | 60.18  | 2.07  | 0.69              | 37.63 | 1170.00 | 17.00 |
| zBluecastle-58  | zircon  | 153.39  | 12.27    | 326.33  | 190.70   | 111.64          | 370.79 | 0.58                 | 227.31 | 3.27  | 0.73              | 43.39 | 1697.00 | 13.00 |
| zBluecastle-67  | zircon  | 470.57  | 37.65    | 204.20  | 150.90   | -6.55           | 238.90 | 0.74                 | 452.11 | 2.73  | 0.72              | 41.86 | 1519.00 | 16.00 |
| zBluecastle-74  | zircon  | 297.58  | 23.81    | 213.13  | 269.28   | 1.91            | 275.13 | 1.26                 | 333.72 | 4.10  | 0.74              | 45.60 | 625.90  | 6.10  |
| zBluecastle-78  | zircon  | 458.38  | 36.67    | 195.63  | 77.75    | 0.40            | 213.53 | 0.40                 | 408.51 | 4.21  | 0.75              | 46.07 | 457.20  | 5.30  |
| zBluecastle-82  | zircon  | 276.75  | 22.14    | 116.60  | 69.12    | -9.13           | 132.47 | 0.59                 | 146.38 | 3.18  | 0.73              | 42.40 | 574.00  | 5.00  |
| zBluecastle-90  | zircon  | 151.67  | 12.13    | 68.36   | 31.82    | 0.27            | 75.69  | 0.47                 | 43.76  | 2.10  | 0.70              | 38.02 | 2744.00 | 19.00 |
| zBluecastle-94  | zircon  | 184.35  | 14.75    | 160.21  | 22.84    | -6.38           | 165.43 | 0.14                 | 127.75 | 4.72  | 0.77              | 49.23 | 1446.00 | 15.00 |
| zBluecastle-107 | zircon  | 260.66  | 20.85    | 141.85  | 71.23    | -10.98          | 158.19 | 0.50                 | 162.73 | 2.95  | 0.72              | 41.00 | 429.90  | 4.10  |
| zBluecastle-109 | zircon  | 837.31  | 66.99    | 47.26   | 22.24    | 0.75            | 52.39  | 0.47                 | 192.16 | 4.45  | 0.76              | 48.65 | 1841.00 | 44.00 |
| zBluecastle-113 | zircon  | 311.78  | 24.94    | 86.28   | 72.06    | -10.20          | 102.82 | 0.84                 | 128.79 | 3.17  | 0.73              | 43.22 | 562.60  | 8.40  |
| zBluecastle-118 | zircon  | 336.28  | 26.90    | 156.23  | 79.00    | -4.89           | 174.39 | 0.51                 | 245.90 | 4.57  | 0.76              | 48.49 | 1087.40 | 9.70  |
| zBluecastle-119 | zircon  | 275.37  | 22.03    | 439.37  | 144.95   | 1.16            | 472.74 | 0.33                 | 537.51 | 3.86  | 0.75              | 46.36 | 1440.00 | 14.00 |
|                 |         |         |          |         |          |                 |        |                      |        |       |                   |       |         |       |
| z13GRT04-02     | zircon  | 87.13   | 6.97     | 85.93   | 27.11    | 4.32            | 92.20  | 0.32                 | 32.34  | 3.71  | 0.74              | 44.58 | 1177.00 | 14.00 |
| z13GRT04-07     | zircon  | 393.84  | 31.51    | 54.50   | 17.61    | 2.32            | 58.56  | 0.32                 | 99.65  | 6.00  | 0.78              | 52.45 | 2590.80 | 5.40  |
| z13GRT04-10     | zircon  | 243.81  | 19.50    | 63.11   | 22.70    | 4.08            | 68.35  | 0.36                 | 67.06  | 3.58  | 0.73              | 43.17 | 1039.00 | 10.00 |
| z13GRT04-14     | zircon  | 353.03  | 28.24    | 122.06  | 54.05    | 3.93            | 134.52 | 0.44                 | 187.92 | 2.66  | 0.72              | 40.44 | 416.20  | 2.90  |
| z13GRT04-17     | zircon  | 562.79  | 45.02    | 105.18  | 69.46    | 3.39            | 121.19 | 0.66                 | 302.49 | 6.79  | 0.79              | 55.89 | 1929.50 | 4.70  |
| z13GRT04-19     | zircon  | 224.53  | 17.96    | 45.08   | 40.76    | 5.38            | 54.49  | 0.90                 | 49.83  | 3.88  | 0.74              | 45.78 | 1064.00 | 11.00 |
| z13GRT04-23     | zircon  | 260.47  | 20.84    | 77.82   | 31.61    | 4.38            | 85.12  | 0.41                 | 98.60  | 10.22 | 0.81              | 61.73 | 539.80  | 4.40  |
| z13GRT04-25     | zircon  | 1286.55 | 102.92   | 30.71   | 25.99    | 1.03            | 36.69  | 0.85                 | 215.47 | 5.40  | 0.76              | 49.08 | 341.90  | 3.30  |
| z13GRT04-34     | zircon  | 370.64  | 29.65    | 58.41   | 47.43    | 2.01            | 69.34  | 0.81                 | 112.36 | 6.91  | 0.79              | 56.40 | 1961.90 | 6.40  |
| z13GRT04-35     | zircon  | 791.54  | 63.32    | 93.30   | 53.99    | 6.88            | 105.76 | 0.58                 | 365.51 | 4.77  | 0.76              | 49.13 | 1439.40 | 7.50  |
| z13GRT04-36     | zircon  | 146.50  | 11.72    | 185.59  | 113.93   | 5.82            | 211.84 | 0.61                 | 125.56 | 3.71  | 0.74              | 45.27 | 1434.40 | 7.80  |
| z13GRT04-41     | zircon  | 297.03  | 23.76    | 57.69   | 36.39    | 1.79            | 66.08  | 0.63                 | 88.25  | 10.87 | 0.81              | 64.57 | 1903.70 | 7.10  |
| z13GRT04-43     | zircon  | 115.01  | 9.20     | 284.16  | 49.58    | 4.26            | 295.59 | 0.17                 | 140.65 | 4.91  | 0.76              | 48.07 | 1035.70 | 9.80  |
| z13GRT04-45     | zircon  | 111.74  | 8.94     | 332.04  | 81.22    | 13.02           | 350.81 | 0.24                 | 155.71 | 3.11  | 0.73              | 42.41 | 1715.30 | 6.00  |
| z13GRT04-54     | zircon  | 148.63  | 11.89    | 318.68  | 97.20    | 7.75            | 341.09 | 0.31                 | 213.10 | 6.13  | 0.77              | 50.79 | 1787.90 | 4.50  |
| z13GRT04-59     | zircon  | 189.67  | 15.17    | 101.08  | 102.26   | 34.37           | 124.79 | 1.01                 | 100.20 | 6.19  | 0.77              | 52.53 | 273.00  | 17.00 |
| z13GRT04-69     | zircon  | 80.12   | 6.41     | 89.37   | 45.89    | 1.56            | 99.94  | 0.51                 | 33.31  | 5.36  | 0.77              | 50.24 | 86.50   | 1.60  |
| z13GRT04-74     | zircon  | 206.67  | 16.53    | 127.27  | 60.27    | 3.86            | 141.16 | 0.47                 | 122.75 | 5.06  | 0.77              | 50.58 | 1429.20 | 6.30  |
| z13GRT04-88     | zircon  | 399.90  | 31.99    | 72.08   | 73.53    | 6.37            | 89.04  | 1.02                 | 147.70 | 4.16  | 0.75              | 46.89 | 1933.50 | 6.50  |
| z13GRT04-91     | zircon  | 179.69  | 14.37    | 96.90   | 56.09    | 4.60            | 109.83 | 0.58                 | 79.71  | 3.48  | 0.74              | 44.66 | 1686.00 | 9.70  |
| z13GRT04-119    | zircon  | 458.68  | 36.69    | 35.26   | 22.32    | 2.11            | 40.41  | 0.63                 | 77.88  | 4.44  | 0.75              | 47.60 | 660.90  | 6.80  |
|                 |         |         |          |         |          |                 |        |                      |        |       |                   |       |         |       |
| z13GRT03-01     | zircon  | 83.63   | 6.69     | 156.99  | 73.15    | 2.91            | 173.85 | 0.47                 | 59.80  | 5.04  | 0.76              | 48.19 | 79.50   | 1.20  |
| z13GRT03-02     | zircon  | 233.79  | 18.70    | 157.14  | 66.09    | 3.72            | 172.37 | 0.42                 | 167.07 | 4.32  | 0.76              | 47.66 | 365.90  | 3.70  |
| z13GRT03-21     | zircon  | 88.88   | 7.11     | 404.39  | 165.04   | 4.49            | 442.41 | 0.41                 | 156.96 | 3.42  | 0.74              | 43.62 | 1735.70 | 5.30  |
| z13GRT03-25     | zircon  | 274.28  | 21.94    | 66.82   | 83.14    | 2.62            | 85.98  | 1.24                 | 96.81  | 4.26  | 0.74              | 46.81 | 2731.90 | 5.80  |
| z13GRT03-28     | zircon  | 180.95  | 14.48    | 180.88  | 64.54    | 6.24            | 195.77 | 0.36                 | 135.23 | 2.13  | 0.70              | 37.76 | 1440.20 | 7.90  |
| z13GRT03-34     | zircon  | 140.60  | 11.25    | 67.49   | 24.84    | 2.81            | 73.22  | 0.37                 | 40.35  | 2.98  | 0.72              | 40.84 | 966.30  | 7.10  |
| z13GRT03-35     | zircon  | 97.90   | 7.83     | 85.37   | 50.43    | 4.43            | 97.00  | 0.59                 | 39.02  | 4.42  | 0.76              | 48.05 | 1031.00 | 14.00 |
| z13GRT03-36     | zircon  | 162.53  | 13.00    | 128.68  | 48.36    | 4.03            | 139.83 | 0.38                 | 88.92  | 3.12  | 0.72              | 40.50 | 456.20  | 4.60  |
| z13GRT03-39     | zircon  | 86.55   | 6.92     | 309.07  | 49.65    | 2.05            | 320.51 | 0.16                 | 116.17 | 6.15  | 0.77              | 50.50 | 1396.00 | 5.80  |
| z13GRT03-40     | zircon  | 167.72  | 13.42    | 85.48   | 91.02    | 5.55            | 106.47 | 1.06                 | 71.58  | 3.65  | 0.73              | 44.28 | 1638.30 | 7.30  |
| z13GRT03-45     | zircon  | 162.20  | 12.98    | 170.44  | 89.31    | 2.84            | 191.01 | 0.52                 | 125.76 | 3.69  | 0.74              | 45.45 | 172.70  | 1.70  |
| z13GRT03-50     | zircon  | 304.42  | 24.35    | 217.47  | 59.25    | 1.25            | 231.12 | 0.27                 | 310.20 | 7.80  | 0.80              | 58.23 | 1444.50 | 7.80  |
| z13GRT03-53     | zircon  | 716.62  | 57.33    | 89.01   | 33.84    | 4.26            | 96.82  | 0.38                 | 287.62 | 3.28  | 0.73              | 42.35 | 1098.20 | 6.10  |
| z13GRT03-54     | zircon  | 601.82  | 48.15    | 80.10   | 32.33    | 4.82            | 87.56  | 0.40                 | 217.90 | 3.48  | 0.73              | 43.27 | 1045.20 | 7.20  |
| z13GRT03-64     | zircon  | 150.68  | 12.05    | 214.97  | 74.69    | 12.13           | 232.23 | 0.35                 | 138.49 | 3.24  | 0.73              | 41.86 | 1454.00 | 10.00 |
| z13GRT03-67     | zircon  | 241.04  | 19.28    | 371.75  | 17.83    | 0.51            | 375.85 | 0.05                 | 395.30 | 6.86  | 0.80              | 56.03 | 574.00  | 3.50  |
| z13GRT03-72     | zircon  | 389.56  | 31.16    | 63.13   | 27.94    | 2.14            | 69.57  | 0.44                 | 110.90 | 3.58  | 0.74              | 44.17 | 606.10  | 6.10  |
| z13GRT03-77     | zircon  | 172.09  | 13.77    | 77.77   | 45.08    | 2.49            | 88.16  | 0.58                 | 59.22  | 2.80  | 0.71              | 40.51 | 2716.00 | 10.00 |
| z13GRT03-105    | zircon  | 83.56   | 6.68     | 159.70  | 36.77    | 3.10            | 168.18 | 0.23                 | 58.07  | 4.28  | 0.76              | 48.41 | 480.50  | 3.20  |
| z13GRT03-107    | zircon  | 255.62  | 20.45    | 95.69   | 56.38    | 7.76            | 108.71 | 0.59                 | 111.67 | 3.34  | 0.73              | 43.32 | 2005.70 | 8.20  |
| z13GRT03-113    | zircon  | 437.62  | 35.01    | 161.87  | 105.47   | 4.67            | 186.17 | 0.65                 | 335.72 | 3.59  | 0.74              | 45.05 | 546.40  | 4.40  |
| z13GRT03-114    | zircon  | 528.33  | 42       |         |          |                 |        |                      |        |       |                   |       |         |       |



|              |        |        |       |        |        |        |        |      |        |      |      |       |         |       |
|--------------|--------|--------|-------|--------|--------|--------|--------|------|--------|------|------|-------|---------|-------|
| z13GRT02-33  | zircon | 266.18 | 21.29 | 111.17 | 124.80 | -9.69  | 139.85 | 1.12 | 140.14 | 2.42 | 0.68 | 36.93 | 626.40  | 9.00  |
| z13GRT02-35  | zircon | 111.02 | 8.88  | 99.20  | 45.65  | -10.82 | 109.65 | 0.46 | 47.64  | 2.79 | 0.72 | 41.12 | 1643.00 | 11.00 |
| z13GRT02-38  | zircon | 136.98 | 10.96 | 73.68  | 43.93  | -15.57 | 83.72  | 0.60 | 43.62  | 2.29 | 0.70 | 38.15 | 1065.00 | 13.00 |
| z13GRT02-40  | zircon | 436.01 | 34.88 | 33.22  | 24.59  | -4.64  | 38.86  | 0.74 | 73.16  | 5.53 | 0.77 | 52.83 | 1875.00 | 13.00 |
| z13GRT02-46  | zircon | 216.73 | 17.34 | 74.34  | 60.39  | 0.00   | 88.24  | 0.81 | 78.03  | 3.86 | 0.74 | 46.08 | 1077.00 | 17.00 |
| z13GRT02-62  | zircon | 481.21 | 38.50 | 108.65 | 81.98  | -6.24  | 127.49 | 0.75 | 254.97 | 3.94 | 0.74 | 46.00 | 1818.30 | 7.30  |
| z13GRT02-68  | zircon | 134.24 | 10.74 | 28.68  | 24.97  | -7.49  | 34.39  | 0.87 | 18.54  | 3.73 | 0.74 | 44.77 | 452.20  | 9.80  |
| z13GRT02-82  | zircon | 175.37 | 14.03 | 350.39 | 41.88  | -5.77  | 360.00 | 0.12 | 261.00 | 4.06 | 0.76 | 47.05 | 1807.00 | 7.10  |
| z13GRT02-87  | zircon | 176.59 | 14.13 | 64.59  | 29.41  | -3.17  | 71.35  | 0.46 | 54.71  | 7.41 | 0.79 | 57.52 | 1023.00 | 13.00 |
| z13GRT02-92  | zircon | 85.27  | 6.82  | 724.02 | 201.70 | 9.50   | 770.50 | 0.28 | 265.79 | 4.02 | 0.75 | 45.21 | 1790.40 | 5.60  |
| z13GRT02-101 | zircon | 189.18 | 15.13 | 188.75 | 163.49 | -9.90  | 226.33 | 0.87 | 169.64 | 3.05 | 0.72 | 42.49 | 463.80  | 5.10  |
| z13GRT02-104 | zircon | 319.19 | 25.54 | 137.47 | 42.28  | 3.48   | 147.22 | 0.31 | 197.65 | 4.51 | 0.76 | 48.68 | 1360.00 | 15.00 |
| z13GRT02-105 | zircon | 173.43 | 13.87 | 87.56  | 79.16  | 0.83   | 105.79 | 0.90 | 77.21  | 5.42 | 0.77 | 51.66 | 1108.10 | 8.20  |
| z13GRT02-108 | zircon | 140.25 | 11.22 | 392.83 | 228.81 | -13.63 | 445.43 | 0.58 | 240.01 | 2.37 | 0.70 | 39.06 | 420.90  | 7.70  |
| z13GRT02-102 | zircon | 83.94  | 6.72  | 181.52 | 87.17  | 3.06   | 201.60 | 0.48 | 66.77  | 3.42 | 0.73 | 42.29 | 91.30   | 0.91  |

|              |        |        |       |        |        |       |        |      |        |      |      |       |         |       |
|--------------|--------|--------|-------|--------|--------|-------|--------|------|--------|------|------|-------|---------|-------|
| z13GRT01-01  | zircon | 293.54 | 23.48 | 113.94 | 46.77  | 4.48  | 124.73 | 0.41 | 160.96 | 8.73 | 0.80 | 58.15 | 991.60  | 6.50  |
| z13GRT01-02  | zircon | 323.08 | 25.85 | 195.54 | 90.39  | 5.60  | 216.37 | 0.46 | 272.62 | 2.36 | 0.71 | 39.15 | 1812.80 | 7.90  |
| z13GRT01-11  | zircon | 201.96 | 16.16 | 115.58 | 99.23  | 4.55  | 138.45 | 0.86 | 104.02 | 1.84 | 0.68 | 35.99 | 2725.40 | 5.10  |
| z13GRT01-13  | zircon | 236.92 | 18.95 | 165.84 | 61.46  | 5.02  | 180.01 | 0.37 | 166.15 | 2.49 | 0.71 | 39.46 | 1449.90 | 7.30  |
| z13GRT01-14  | zircon | 263.26 | 21.06 | 28.84  | 29.18  | 7.22  | 35.60  | 1.01 | 35.87  | 2.31 | 0.70 | 38.33 | 1656.00 | 12.00 |
| z13GRT01-17  | zircon | 128.65 | 10.29 | 110.72 | 77.90  | 4.97  | 128.67 | 0.70 | 61.39  | 1.96 | 0.68 | 35.93 | 1556.20 | 7.90  |
| z13GRT01-19  | zircon | 173.85 | 13.91 | 65.63  | 39.05  | 3.83  | 74.64  | 0.59 | 49.64  | 2.18 | 0.70 | 38.40 | 534.40  | 5.80  |
| z13GRT01-20  | zircon | 253.31 | 20.26 | 107.96 | 82.42  | 5.57  | 126.96 | 0.76 | 125.81 | 2.75 | 0.71 | 40.42 | 2758.00 | 7.30  |
| z13GRT01-23  | zircon | 390.46 | 31.24 | 125.58 | 70.70  | 3.36  | 141.88 | 0.56 | 212.84 | 2.28 | 0.69 | 37.41 | 418.40  | 3.70  |
| z13GRT01-32  | zircon | 264.00 | 21.12 | 37.46  | 30.67  | 3.81  | 44.54  | 0.82 | 45.88  | 2.74 | 0.71 | 40.12 | 1099.00 | 10.00 |
| z13GRT01-37  | zircon | 338.73 | 27.10 | 100.51 | 48.27  | 2.71  | 111.63 | 0.48 | 142.67 | 1.80 | 0.68 | 35.97 | 1657.70 | 7.70  |
| z13GRT01-44  | zircon | 96.11  | 7.69  | 369.84 | 239.63 | 2.69  | 425.02 | 0.65 | 160.11 | 3.10 | 0.72 | 41.64 | 85.16   | 0.91  |
| z13GRT01-47  | zircon | 140.37 | 11.23 | 76.68  | 45.42  | 6.54  | 87.17  | 0.59 | 47.79  | 2.66 | 0.72 | 40.81 | 1006.70 | 7.20  |
| z13GRT01-57  | zircon | 281.62 | 22.53 | 478.93 | 176.30 | 4.84  | 519.54 | 0.37 | 553.17 | 1.87 | 0.69 | 36.27 | 300.40  | 2.20  |
| z13GRT01-62  | zircon | 184.15 | 14.73 | 165.07 | 89.20  | 3.49  | 185.63 | 0.54 | 133.60 | 2.79 | 0.71 | 40.52 | 1642.40 | 6.90  |
| z13GRT01-68  | zircon | 248.48 | 19.88 | 214.38 | 73.24  | 3.02  | 231.25 | 0.34 | 230.76 | 3.00 | 0.73 | 42.84 | 1472.00 | 8.30  |
| z13GRT01-80  | zircon | 166.85 | 13.35 | 96.22  | 52.66  | 3.06  | 108.36 | 0.55 | 70.62  | 2.73 | 0.72 | 40.58 | 449.40  | 3.90  |
| z13GRT01-83  | zircon | 392.50 | 31.40 | 178.54 | 54.28  | 4.67  | 191.06 | 0.30 | 277.40 | 1.79 | 0.67 | 33.74 | 1130.40 | 8.40  |
| z13GRT01-106 | zircon | 220.23 | 17.62 | 419.98 | 111.52 | 5.05  | 445.68 | 0.27 | 361.45 | 1.79 | 0.67 | 34.19 | 205.10  | 1.70  |
| z13GRT01-109 | zircon | 335.14 | 26.81 | 163.64 | 67.55  | 5.57  | 179.21 | 0.41 | 232.56 | 2.37 | 0.70 | 38.24 | 1647.20 | 8.20  |
| z13GRT01-111 | zircon | 325.03 | 26.00 | 209.99 | 111.84 | 10.58 | 235.79 | 0.53 | 277.59 | 1.65 | 0.66 | 32.94 | 602.50  | 5.40  |
| z13GRT01-115 | zircon | 398.75 | 31.90 | 315.31 | 114.26 | 6.08  | 341.64 | 0.36 | 587.69 | 5.97 | 0.78 | 52.22 | 1927.10 | 5.50  |

|             |        |        |       |        |        |      |        |      |        |      |      |       |         |       |
|-------------|--------|--------|-------|--------|--------|------|--------|------|--------|------|------|-------|---------|-------|
| z13WSUN-1   | zircon | 230.05 | 18.40 | 165.40 | 66.54  | 1.42 | 180.73 | 0.40 | 170.85 | 3.94 | 0.75 | 46.32 | 455.50  | 4.50  |
| z13WSUN-2   | zircon | 146.06 | 11.68 | 386.73 | 46.12  | 1.47 | 397.35 | 0.12 | 233.01 | 3.05 | 0.74 | 43.11 | 1006.90 | 6.20  |
| z13WSUN-3   | zircon | 317.42 | 25.39 | 57.33  | 23.71  | 0.36 | 62.79  | 0.41 | 80.22  | 3.13 | 0.73 | 42.66 | 979.40  | 9.80  |
| z13WSUN-4   | zircon | 240.21 | 19.22 | 76.94  | 17.82  | 0.22 | 81.05  | 0.23 | 82.59  | 5.04 | 0.77 | 51.00 | 236.00  | 4.20  |
| z13WSUN-7   | zircon | 349.83 | 27.99 | 126.42 | 81.78  | 0.99 | 145.25 | 0.65 | 193.66 | 1.97 | 0.69 | 37.06 | 647.50  | 7.70  |
| z13WSUN-9   | zircon | 272.43 | 21.79 | 99.47  | 65.93  | 1.24 | 114.65 | 0.66 | 127.03 | 3.38 | 0.74 | 44.89 | 2842.70 | 7.10  |
| z13WSUN-20  | zircon | 94.31  | 7.54  | 364.23 | 202.56 | 1.00 | 410.87 | 0.56 | 145.23 | 1.95 | 0.69 | 36.88 | 77.90   | 4.00  |
| z13WSUN-35  | zircon | 186.64 | 14.93 | 151.34 | 127.12 | 3.42 | 180.62 | 0.84 | 137.28 | 3.78 | 0.74 | 46.11 | 1725.00 | 11.00 |
| z13WSUN-40  | zircon | 364.73 | 29.18 | 54.96  | 29.34  | 1.23 | 61.72  | 0.53 | 89.14  | 2.72 | 0.72 | 40.60 | 998.10  | 9.60  |
| z13WSUN-43  | zircon | 186.41 | 14.91 | 482.04 | 120.05 | 1.65 | 509.68 | 0.25 | 363.20 | 2.03 | 0.70 | 37.62 | 1778.90 | 7.40  |
| z13WSUN-46  | zircon | 395.13 | 31.61 | 103.21 | 110.63 | 0.82 | 128.68 | 1.07 | 204.48 | 3.06 | 0.72 | 42.87 | 2722.00 | 12.00 |
| z13WSUN-47  | zircon | 110.54 | 8.84  | 358.01 | 257.17 | 1.28 | 417.22 | 0.72 | 189.00 | 4.60 | 0.75 | 47.67 | 483.50  | 4.80  |
| z13WSUN-51  | zircon | 147.02 | 11.76 | 230.09 | 121.88 | 2.10 | 258.15 | 0.53 | 155.59 | 4.15 | 0.75 | 47.08 | 1751.00 | 18.00 |
| z13WSUN-61  | zircon | 338.16 | 27.05 | 108.83 | 95.04  | 1.62 | 130.72 | 0.87 | 167.93 | 2.07 | 0.69 | 37.11 | 1580.50 | 8.50  |
| z13WSUN-65  | zircon | 175.86 | 14.07 | 227.66 | 141.36 | 1.39 | 260.21 | 0.62 | 174.60 | 2.21 | 0.70 | 38.18 | 456.50  | 4.70  |
| z13WSUN-67  | zircon | 212.12 | 16.97 | 56.88  | 38.08  | 0.92 | 65.65  | 0.67 | 54.56  | 2.74 | 0.72 | 40.77 | 1629.00 | 11.00 |
| z13WSUN-92  | zircon | 96.15  | 7.69  | 257.14 | 92.73  | 3.03 | 278.50 | 0.36 | 103.56 | 2.40 | 0.71 | 39.67 | 1054.00 | 11.00 |
| z13WSUN-116 | zircon | 225.24 | 18.02 | 262.30 | 339.04 | 1.62 | 340.35 | 1.29 | 279.46 | 1.73 | 0.66 | 34.56 | 255.50  | 2.20  |
| z13WSUN-118 | zircon | 289.81 | 23.18 | 168.49 | 51.11  | 1.30 | 180.26 | 0.30 | 194.15 | 1.72 | 0.68 | 34.64 | 1536.20 | 7.80  |

|             |        |        |       |        |        |       |        |      |        |      |      |       |         |       |
|-------------|--------|--------|-------|--------|--------|-------|--------|------|--------|------|------|-------|---------|-------|
| z13WKEN-03  | zircon | 297.89 | 23.83 | 481.15 | 166.55 | 15.55 | 519.56 | 0.35 | 584.66 | 1.83 | 0.69 | 36.05 | 316.70  | 2.20  |
| z13WKEN-04  | zircon | 292.11 | 23.37 | 336.60 | 45.33  | 1.92  | 347.05 | 0.13 | 423.04 | 4.22 | 0.76 | 47.17 | 996.60  | 5.70  |
| z13WKEN-05  | zircon | 243.03 | 19.44 | 193.65 | 93.95  | 3.49  | 215.30 | 0.49 | 199.47 | 2.03 | 0.70 | 37.48 | 1982.00 | 11.00 |
| z13WKEN-06  | zircon | 187.10 | 14.97 | 70.82  | 18.74  | 2.19  | 75.15  | 0.26 | 59.99  | 6.02 | 0.78 | 52.97 | 1143.00 | 11.00 |
| z13WKEN-17  | zircon | 115.43 | 9.23  | 169.40 | 62.55  | 3.16  | 183.81 | 0.37 | 78.53  | 2.24 | 0.68 | 35.36 | 1094.90 | 7.00  |
| z13WKEN-21  | zircon | 153.00 | 12.24 | 229.00 | 107.00 | 3.69  | 253.65 | 0.47 | 146.49 | 2.38 | 0.69 | 37.06 | 538.70  | 3.50  |
| z13WKEN-24  | zircon | 76.65  | 6.13  | 105.26 | 86.82  | 6.52  | 125.28 | 0.82 | 38.34  | 3.55 | 0.73 | 44.29 | 526.80  | 4.40  |
| z13WKEN-25  | zircon | 287.82 | 23.03 | 98.83  | 42.76  | 4.28  | 108.70 | 0.43 | 119.88 | 2.06 | 0.70 | 37.58 | 1518.00 | 13.00 |
| z13WKEN-29  | zircon | 114.57 | 9.17  | 534.34 | 38.68  | 14.97 | 543.32 | 0.07 | 234.51 | 1.84 | 0.69 | 36.18 | 983.90  | 6.70  |
| z13WKEN-31  | zircon | 80.08  | 6.41  | 597.53 | 145.22 | 8.55  | 631.00 | 0.24 | 187.99 | 2.32 | 0.69 | 35.74 | 1796.20 | 7.70  |
| z13WKEN-39  | zircon | 493.05 | 39.44 | 125.82 | 58.30  | 8.14  | 139.28 | 0.46 | 275.57 | 2.57 | 0.72 | 40.89 | 1522.10 | 8.50  |
| z13WKEN-47  | zircon | 200.07 | 16.01 | 178.41 | 60.47  | 7.73  | 192.37 | 0.34 | 147.07 | 2.14 | 0.70 | 37.69 | 451.50  | 4.00  |
| z13WKEN-60  | zircon | 126.27 | 10.10 | 377.22 | 26.77  | 6.89  | 383.42 | 0.07 | 190.42 | 2.72 | 0.72 | 40.56 | 1740.20 | 6.50  |
| z13WKEN-73  | zircon | 75.71  | 6.06  | 264.40 | 129.02 | 3.00  | 294.11 | 0.49 | 87.37  | 3.29 | 0.72 | 41.70 | 81.70   | 1.20  |
| z13WKEN-91  | zircon | 99.86  | 7.99  | 179.07 | 92.31  | 9.91  | 200.37 | 0.52 | 77.64  | 2.78 | 0.71 | 40.27 | 1682.00 | 7.20  |
| z13WKEN-92  | zircon | 145.75 | 11.66 | 254.22 | 83.33  | 4.94  | 273.43 | 0.33 | 155.34 | 2.45 | 0.72 | 40.11 | 2027.00 | 18.00 |
| z13WKEN-105 | zircon | 153.14 | 12.25 | 186.70 | 106.74 | 1.61  | 211.28 | 0.57 | 125.82 | 2.74 | 0.71 | 40.24 | 218.70  | 2.20  |
| z13WKEN-114 | zircon | 286.78 | 22.94 | 65.21  | 86.70  | 3.42  | 85.19  | 1.33 | 94.53  | 2.58 | 0.70 | 39.54 | 667.60  | 6.30  |
| z13WKEN-117 | zircon | 396.94 | 31.75 | 226.42 | 146.95 | 10.15 | 260.30 | 0.65 | 424.52 | 3.69 | 0.74 | 45.05 | 1644.00 | 11.00 |

Reduced (U-Th[Sm])/He Data

Mount Garfield, CO

| Sample        | mineral | Age, Ma | err., Ma | U (ppm) | Th (ppm) | 147Sm (pp [U]e | Th/U   | He (nmol/1 mass (ug) | Ft     | ESR  | Final age 2 error |       |         |       |
|---------------|---------|---------|----------|---------|----------|----------------|--------|----------------------|--------|------|-------------------|-------|---------|-------|
| z13GJR01-1    | zircon  | 78.19   | 6.25     | 300.79  | 114.52   | 0.82           | 327.16 | 0.38                 | 94.56  | 2.36 | 0.68              | 35.48 | 79.30   | 0.96  |
| z13GJR01-6    | zircon  | 103.72  | 8.30     | 116.09  | 97.10    | 5.54           | 138.47 | 0.84                 | 54.16  | 2.15 | 0.69              | 37.71 | 1707.00 | 11.00 |
| z13GJR01-9    | zircon  | 316.69  | 25.34    | 230.93  | 138.88   | 1.75           | 262.91 | 0.60                 | 310.43 | 1.74 | 0.68              | 35.29 | 556.20  | 4.90  |
| z13GJR01-24   | zircon  | 151.07  | 12.09    | 351.60  | 41.80    | 1.09           | 361.22 | 0.12                 | 207.35 | 2.28 | 0.70              | 36.91 | 639.00  | 10.00 |
| z13GJR01-29   | zircon  | 86.33   | 6.91     | 112.44  | 59.39    | 0.97           | 126.12 | 0.53                 | 43.13  | 3.43 | 0.73              | 42.85 | 92.40   | 1.90  |
| z13GJR01-38   | zircon  | 290.18  | 23.21    | 317.25  | 25.94    | 5.56           | 323.25 | 0.08                 | 369.59 | 2.35 | 0.72              | 39.47 | 1191.00 | 12.00 |
| z13GJR01-40   | zircon  | 238.45  | 19.08    | 229.11  | 47.01    | 1.92           | 239.94 | 0.21                 | 224.65 | 2.89 | 0.72              | 39.91 | 434.70  | 3.40  |
| z13GJR01-45   | zircon  | 76.75   | 6.14     | 890.65  | 353.07   | 1.68           | 971.94 | 0.40                 | 283.23 | 2.14 | 0.70              | 37.96 | 1686.30 | 8.50  |
| z13GJR01-69   | zircon  | 253.89  | 20.31    | 228.91  | 185.29   | 2.19           | 271.58 | 0.81                 | 274.14 | 3.03 | 0.72              | 42.33 | 327.30  | 2.40  |
| z13GJR01-74   | zircon  | 246.10  | 19.69    | 334.75  | 120.55   | 3.39           | 362.52 | 0.36                 | 347.79 | 2.62 | 0.71              | 39.45 | 1084.00 | 14.00 |
| z13GJR01-76   | zircon  | 89.92   | 7.19     | 374.82  | 144.46   | 1.11           | 408.08 | 0.39                 | 130.57 | 1.50 | 0.66              | 32.47 | 102.60  | 1.10  |
| z13GJR01-82   | zircon  | 229.96  | 18.40    | 163.09  | 40.94    | 0.55           | 172.52 | 0.25                 | 154.92 | 2.50 | 0.71              | 39.50 | 1051.30 | 5.80  |
| z13GJR01-83   | zircon  | 384.24  | 30.74    | 211.71  | 89.96    | 10.87          | 232.47 | 0.42                 | 359.52 | 2.78 | 0.73              | 42.08 | 1470.00 | 19.00 |
| z13GJR01-87   | zircon  | 316.97  | 25.36    | 212.35  | 79.44    | 1.98           | 230.65 | 0.37                 | 271.34 | 1.68 | 0.67              | 34.54 | 1676.00 | 14.00 |
| z13GJR01-92   | zircon  | 345.16  | 27.61    | 171.70  | 73.75    | 1.77           | 188.68 | 0.43                 | 253.70 | 2.19 | 0.71              | 38.82 | 669.30  | 5.40  |
| z13GJR01-102  | zircon  | 184.98  | 14.80    | 190.46  | 75.13    | 0.64           | 207.76 | 0.39                 | 141.96 | 1.73 | 0.68              | 34.88 | 1505.00 | 11.00 |
| z13GJR01-113  | zircon  | 347.48  | 27.80    | 61.06   | 38.16    | 1.34           | 69.85  | 0.63                 | 92.54  | 2.07 | 0.69              | 37.08 | 1664.00 | 17.00 |
| z13GJR01-115  | zircon  | 459.52  | 36.76    | 43.08   | 59.68    | 1.63           | 56.82  | 1.39                 | 103.85 | 2.72 | 0.71              | 41.37 | 2725.00 | 28.00 |
|               |         |         |          |         |          |                |        |                      |        |      |                   |       |         |       |
| zGJCOCE01-01  | zircon  | 253.99  | 20.32    | 76.89   | 35.75    | 7.44           | 85.16  | 0.46                 | 79.85  | 1.82 | 0.67              | 34.58 | 1170.00 | 12.00 |
| zGJCOCE01-10  | zircon  | 125.99  | 10.08    | 298.41  | 120.85   | 4.75           | 326.25 | 0.40                 | 140.94 | 1.09 | 0.63              | 29.98 | 2677.00 | 8.10  |
| zGJCOCE01-12  | zircon  | 292.76  | 23.42    | 30.79   | 23.72    | 2.32           | 36.26  | 0.77                 | 40.37  | 2.24 | 0.69              | 37.33 | 473.70  | 6.70  |
| zGJCOCE01-18  | zircon  | 79.61   | 6.37     | 860.95  | 173.35   | 18.58          | 900.95 | 0.20                 | 268.29 | 2.19 | 0.69              | 36.11 | 65.50   | 0.92  |
| zGJCOCE01-35  | zircon  | 149.58  | 11.97    | 180.16  | 67.75    | 5.10           | 195.79 | 0.38                 | 108.15 | 1.63 | 0.68              | 35.00 | 1994.30 | 7.80  |
| zGJCOCE01-36  | zircon  | 496.46  | 39.72    | 138.93  | 62.77    | 5.21           | 153.41 | 0.45                 | 256.26 | 1.00 | 0.61              | 27.85 | 1653.00 | 11.00 |
| zGJCOCE01-37  | zircon  | 519.77  | 41.58    | 84.37   | 42.43    | 3.02           | 94.15  | 0.50                 | 184.56 | 1.72 | 0.68              | 34.95 | 1904.80 | 7.70  |
| zGJCOCE01-41  | zircon  | 125.31  | 10.02    | 33.61   | 24.83    | 2.79           | 39.34  | 0.74                 | 19.12  | 2.61 | 0.71              | 40.30 | 1498.00 | 13.00 |
| zGJCOCE01-43  | zircon  | 274.49  | 21.96    | 124.52  | 78.98    | 3.15           | 142.71 | 0.63                 | 146.97 | 1.98 | 0.68              | 36.08 | 554.10  | 5.60  |
| zGJCOCE01-56  | zircon  | 120.36  | 9.63     | 31.93   | 35.59    | 3.02           | 40.14  | 1.11                 | 17.70  | 1.72 | 0.67              | 35.30 | 2077.40 | 9.90  |
| zGJCOCE01-63  | zircon  | 188.30  | 15.06    | 155.18  | 67.14    | 8.47           | 170.68 | 0.43                 | 118.34 | 1.72 | 0.67              | 34.66 | 1058.40 | 9.50  |
| zGJCOCE01-70  | zircon  | 132.97  | 10.64    | 57.96   | 56.57    | 11.50          | 71.04  | 0.98                 | 33.91  | 1.54 | 0.66              | 33.55 | 487.30  | 5.40  |
| zGJCOCE01-80  | zircon  | 319.21  | 25.54    | 22.54   | 13.01    | 1.97           | 25.55  | 0.58                 | 31.44  | 2.11 | 0.70              | 38.21 | 1056.00 | 20.00 |
| zGJCOCE01-83  | zircon  | 338.13  | 27.05    | 147.65  | 44.64    | 3.64           | 157.94 | 0.30                 | 208.85 | 2.29 | 0.71              | 38.97 | 1661.20 | 8.70  |
| zGJCOCE01-102 | zircon  | 215.04  | 17.20    | 82.56   | 33.94    | 6.99           | 90.41  | 0.41                 | 73.16  | 1.94 | 0.69              | 36.31 | 1446.40 | 8.20  |
| zGJCOCE01-106 | zircon  | 142.24  | 11.38    | 63.65   | 36.84    | 1.63           | 72.14  | 0.58                 | 38.38  | 1.92 | 0.69              | 36.45 | 1621.00 | 10.00 |
| zGJCOCE01-110 | zircon  | 329.11  | 26.33    | 224.05  | 220.38   | 12.31          | 274.84 | 0.98                 | 309.12 | 1.01 | 0.62              | 29.77 | 428.00  | 4.40  |
| zGJCOCE01-112 | zircon  | 590.63  | 47.25    | 20.29   | 21.35    | 2.00           | 25.22  | 1.05                 | 55.69  | 1.56 | 0.67              | 34.65 | 2827.00 | 13.00 |
| zGJCOCE01-118 | zircon  | 102.19  | 8.18     | 236.52  | 40.73    | 9.71           | 245.95 | 0.17                 | 90.83  | 1.39 | 0.67              | 33.09 | 1203.00 | 22.00 |
|               |         |         |          |         |          |                |        |                      |        |      |                   |       |         |       |
| z13GJCO01-2   | zircon  | 172.84  | 13.83    | 168.20  | 50.38    | 1.35           | 179.80 | 0.30                 | 119.92 | 2.20 | 0.71              | 38.77 | 1161.10 | 8.40  |
| z13GJCO01-4   | zircon  | 371.26  | 29.70    | 139.46  | 108.46   | 2.77           | 164.45 | 0.78                 | 231.88 | 2.05 | 0.69              | 36.79 | 1508.60 | 6.30  |
| z13GJCO01-9   | zircon  | 385.29  | 30.82    | 94.25   | 59.28    | 1.19           | 107.90 | 0.63                 | 169.94 | 3.41 | 0.74              | 44.45 | 2569.20 | 7.00  |
| z13GJCO01-15  | zircon  | 194.84  | 15.59    | 106.76  | 61.25    | 0.73           | 120.86 | 0.57                 | 92.39  | 2.60 | 0.72              | 40.92 | 1541.00 | 9.60  |
| z13GJCO01-19  | zircon  | 97.97   | 7.84     | 57.21   | 30.66    | 0.48           | 64.27  | 0.54                 | 26.12  | 4.55 | 0.76              | 49.55 | 1041.10 | 8.00  |
| z13GJCO01-20  | zircon  | 89.26   | 7.14     | 386.49  | 194.00   | 1.61           | 431.16 | 0.50                 | 130.85 | 1.17 | 0.63              | 29.75 | 514.00  | 4.70  |
| z13GJCO01-22  | zircon  | 427.65  | 34.21    | 106.57  | 57.88    | 2.52           | 119.91 | 0.54                 | 204.27 | 2.58 | 0.72              | 40.78 | 1065.50 | 9.40  |
| z13GJCO01-27  | zircon  | 472.70  | 37.82    | 45.19   | 41.43    | 0.64           | 54.73  | 0.92                 | 109.16 | 4.61 | 0.76              | 48.58 | 1662.80 | 9.70  |
| z13GJCO01-28  | zircon  | 1370.52 | 109.64   | 120.40  | 67.05    | 1.23           | 135.84 | 0.56                 | 807.73 | 2.64 | 0.72              | 40.81 | 2775.30 | 5.00  |
| z13GJCO01-31  | zircon  | 76.46   | 6.12     | 136.25  | 49.84    | 0.29           | 147.72 | 0.37                 | 44.00  | 2.76 | 0.72              | 40.66 | 80.10   | 1.20  |
| z13GJCO01-38  | zircon  | 324.13  | 25.93    | 264.58  | 94.36    | 3.52           | 286.32 | 0.36                 | 364.22 | 2.61 | 0.71              | 39.58 | 1788.20 | 5.50  |
| z13GJCO01-43  | zircon  | 176.33  | 14.11    | 92.65   | 36.24    | 4.62           | 101.01 | 0.39                 | 71.92  | 3.34 | 0.74              | 44.30 | 1644.00 | 26.00 |
| z13GJCO01-51  | zircon  | 308.20  | 24.66    | 30.81   | 29.83    | 1.00           | 37.68  | 0.97                 | 45.95  | 2.96 | 0.72              | 41.52 | 587.20  | 7.60  |
| z13GJCO01-54  | zircon  | 75.73   | 6.06     | 190.86  | 252.95   | 0.58           | 249.09 | 1.33                 | 70.98  | 2.31 | 0.69              | 37.97 | 77.90   | 1.00  |
| z13GJCO01-65  | zircon  | 280.45  | 22.44    | 260.76  | 164.65   | 1.62           | 298.67 | 0.63                 | 330.71 | 2.68 | 0.72              | 41.08 | 563.50  | 7.50  |
| z13GJCO01-87  | zircon  | 116.07  | 9.29     | 32.67   | 16.40    | 0.35           | 36.45  | 0.50                 | 17.25  | 3.98 | 0.75              | 46.53 | 1927.00 | 13.00 |
| z13GJCO01-98  | zircon  | 132.74  | 10.62    | 82.71   | 91.57    | 1.32           | 103.80 | 1.11                 | 55.96  | 4.27 | 0.74              | 46.45 | 454.20  | 4.90  |
| z13GJCO01-103 | zircon  | 463.71  | 37.10    | 134.79  | 43.35    | 1.16           | 144.77 | 0.32                 | 257.19 | 2.19 | 0.69              | 36.22 | 1066.90 | 7.90  |
| z13GJCO01-106 | zircon  | 360.03  | 28.80    | 56.53   | 42.72    | 1.31           | 66.37  | 0.76                 | 97.19  | 3.87 | 0.73              | 44.22 | 663.10  | 8.40  |

## Reduced (U-Th[Sm])/He Data

## other locations in Colorado

| Sample         | mineral | Age, Ma | err., Ma | U (ppm) | Th (ppm) | 147Sm (ppm) | [U]e    | Th/U | He (nmol/g) mass (ug) | Ft   | ESR  | Final age 206_235error |         |       |
|----------------|---------|---------|----------|---------|----------|-------------|---------|------|-----------------------|------|------|------------------------|---------|-------|
| z13NESLEN-1    | zircon  | 315.71  | 25.26    | 146.63  | 66.66    | 2.73        | 161.99  | 0.45 | 214.60                | 5.66 | 0.76 | 48.72                  | 2056.70 | 9.30  |
| z13NESLEN-3    | zircon  | 86.34   | 6.91     | 102.66  | 97.79    | 1.44        | 125.18  | 0.95 | 44.73                 | 4.87 | 0.76 | 49.78                  | 1721.00 | 11.00 |
| z13NESLEN-4    | zircon  | 286.52  | 22.92    | 289.45  | 141.23   | 1.58        | 321.97  | 0.49 | 366.62                | 3.01 | 0.72 | 41.55                  | 1446.00 | 17.00 |
| z13NESLEN-17   | zircon  | 86.47   | 6.92     | 300.49  | 97.64    | 1.06        | 322.97  | 0.32 | 112.01                | 3.42 | 0.74 | 44.11                  | 1722.00 | 11.00 |
| z13NESLEN-25   | zircon  | 92.18   | 7.37     | 357.61  | 200.44   | 1.82        | 403.77  | 0.56 | 139.29                | 2.15 | 0.69 | 36.76                  | 1478.00 | 18.00 |
| z13NESLEN-28   | zircon  | 343.10  | 27.45    | 139.62  | 76.68    | 1.47        | 157.28  | 0.55 | 212.86                | 2.47 | 0.71 | 40.37                  | 382.10  | 4.20  |
| z13NESLEN-29   | zircon  | 403.55  | 32.28    | 112.75  | 49.89    | 0.44        | 124.24  | 0.44 | 211.30                | 4.42 | 0.76 | 48.32                  | 1631.00 | 23.00 |
| z13NESLEN-32   | zircon  | 408.25  | 32.66    | 404.43  | 261.21   | 2.76        | 464.57  | 0.65 | 754.60                | 2.64 | 0.72 | 40.99                  | 410.40  | 3.40  |
| z13NESLEN-36   | zircon  | 429.36  | 34.35    | 132.05  | 85.75    | 1.92        | 151.80  | 0.65 | 270.91                | 3.93 | 0.75 | 46.36                  | 419.70  | 3.10  |
| z13NESLEN-38   | zircon  | 90.15   | 7.21     | 549.70  | 157.61   | 2.88        | 585.99  | 0.29 | 213.00                | 3.40 | 0.74 | 44.72                  | 1701.60 | 9.60  |
| z13NESLEN-40   | zircon  | 84.12   | 6.73     | 285.68  | 174.58   | 1.42        | 325.88  | 0.61 | 115.08                | 5.33 | 0.77 | 52.00                  | 2005.00 | 11.00 |
| z13NESLEN-43   | zircon  | 421.92  | 33.75    | 151.11  | 62.16    | 0.76        | 165.42  | 0.41 | 286.18                | 3.31 | 0.74 | 44.05                  | 1038.00 | 12.00 |
| z13NESLEN-46   | zircon  | 101.04  | 8.08     | 229.08  | 156.24   | 3.21        | 265.06  | 0.68 | 106.10                | 3.06 | 0.73 | 42.95                  | 2446.50 | 9.10  |
| z13NESLEN-47   | zircon  | 79.02   | 6.32     | 221.54  | 69.24    | 1.06        | 237.49  | 0.31 | 79.48                 | 6.37 | 0.78 | 53.23                  | 1796.90 | 9.70  |
| z13NESLEN-51   | zircon  | 253.43  | 20.27    | 134.98  | 51.04    | 0.74        | 146.73  | 0.38 | 157.94                | 5.33 | 0.77 | 51.46                  | 1075.70 | 9.20  |
| z13NESLEN-69   | zircon  | 412.73  | 33.02    | 133.64  | 65.23    | 1.70        | 148.66  | 0.49 | 243.11                | 2.80 | 0.71 | 40.21                  | 1043.00 | 12.00 |
| z13NESLEN-100  | zircon  | 120.44  | 9.64     | 131.51  | 80.30    | 2.29        | 150.01  | 0.61 | 76.71                 | 5.77 | 0.78 | 53.70                  | 1716.00 | 12.00 |
| z13NESLEN-102  | zircon  | 294.89  | 23.59    | 141.23  | 117.12   | 1.08        | 168.19  | 0.83 | 203.04                | 4.41 | 0.74 | 45.82                  | 471.70  | 4.50  |
| z13NESLEN-119  | zircon  | 332.96  | 26.64    | 129.50  | 215.41   | 3.24        | 179.10  | 1.66 | 230.90                | 2.59 | 0.70 | 39.52                  | 618.70  | 6.60  |
| zS2SEGO-3      | zircon  | 141.46  | 11.32    | 49.98   | 37.45    | 0.84        | 58.61   | 0.75 | 32.77                 | 3.04 | 0.72 | 42.42                  | 1064.50 | 9.30  |
| zS2SEGO-7      | zircon  | 242.48  | 19.40    | 175.60  | 91.87    | 0.96        | 196.75  | 0.52 | 186.06                | 2.52 | 0.71 | 39.83                  | 278.00  | 3.40  |
| zS2SEGO-9      | zircon  | 80.65   | 6.45     | 73.15   | 66.89    | 0.65        | 88.55   | 0.91 | 26.61                 | 1.96 | 0.69 | 36.80                  | 81.70   | 1.80  |
| zS2SEGO-18     | zircon  | 314.36  | 25.15    | 44.37   | 31.46    | 0.89        | 51.61   | 0.71 | 62.13                 | 2.06 | 0.69 | 37.78                  | 560.40  | 5.70  |
| zS2SEGO-21     | zircon  | 285.28  | 22.82    | 207.69  | 45.63    | 1.59        | 218.21  | 0.22 | 236.84                | 2.06 | 0.69 | 36.47                  | 421.80  | 3.60  |
| zS2SEGO-22     | zircon  | 355.18  | 28.41    | 111.53  | 41.43    | 0.54        | 121.07  | 0.37 | 163.08                | 1.84 | 0.69 | 36.12                  | 1054.00 | 7.20  |
| zS2SEGO-30     | zircon  | 304.60  | 24.37    | 57.90   | 22.42    | 0.28        | 63.07   | 0.39 | 75.77                 | 2.50 | 0.72 | 40.34                  | 3017.00 | 14.00 |
| zS2SEGO-36     | zircon  | 309.60  | 24.77    | 51.99   | 31.49    | 4.03        | 59.26   | 0.61 | 69.39                 | 2.05 | 0.69 | 36.53                  | 1021.00 | 11.00 |
| zS2SEGO-40     | zircon  | 290.87  | 23.27    | 98.83   | 41.84    | 1.43        | 108.47  | 0.42 | 120.97                | 2.27 | 0.70 | 37.61                  | 1083.00 | 17.00 |
| zS2SEGO-43     | zircon  | 465.10  | 37.21    | 153.66  | 81.76    | 1.73        | 172.50  | 0.53 | 333.81                | 3.95 | 0.75 | 45.88                  | 1097.60 | 7.00  |
| zS2SEGO-45     | zircon  | 97.95   | 7.84     | 216.24  | 73.16    | 1.21        | 233.08  | 0.34 | 94.40                 | 4.56 | 0.76 | 48.64                  | 1704.00 | 13.00 |
| zS2SEGO-46     | zircon  | 210.91  | 16.87    | 334.70  | 198.77   | 6.55        | 380.49  | 0.59 | 320.39                | 3.17 | 0.73 | 42.90                  | 261.90  | 2.20  |
| zS2SEGO-60     | zircon  | 178.75  | 14.30    | 123.23  | 70.62    | 1.02        | 139.49  | 0.57 | 89.48                 | 1.39 | 0.66 | 32.98                  | 1730.00 | 14.00 |
| zS2SEGO-68     | zircon  | 562.13  | 44.97    | 315.46  | 12.12    | 1.00        | 318.26  | 0.04 | 743.27                | 2.97 | 0.74 | 42.97                  | 2016.00 | 10.00 |
| zS2SEGO-80     | zircon  | 99.91   | 7.99     | 133.06  | 66.49    | 0.79        | 148.37  | 0.50 | 55.89                 | 2.16 | 0.69 | 37.31                  | 107.20  | 1.40  |
| zS2SEGO-83     | zircon  | 159.15  | 12.73    | 188.10  | 67.91    | 2.78        | 203.75  | 0.36 | 124.21                | 2.35 | 0.70 | 38.25                  | 1749.00 | 22.00 |
| zS2SEGO-86     | zircon  | 468.76  | 37.50    | 66.74   | 22.96    | 0.51        | 72.03   | 0.34 | 135.23                | 2.51 | 0.72 | 40.60                  | 2105.00 | 20.00 |
| zS2SEGO-87     | zircon  | 554.97  | 44.40    | 74.13   | 27.93    | 0.47        | 80.56   | 0.38 | 184.13                | 3.02 | 0.73 | 43.20                  | 2843.00 | 10.00 |
| zS2SEGO-119    | zircon  | 116.81  | 9.34     | 107.00  | 60.54    | 0.85        | 120.94  | 0.57 | 58.60                 | 4.65 | 0.76 | 49.36                  | 103.10  | 1.80  |
| z13LOYD-1      | zircon  | 147.72  | 11.82    | 196.19  | 82.51    | 0.77        | 215.19  | 0.42 | 123.37                | 2.47 | 0.71 | 39.81                  | 104.40  | 1.30  |
| z13LOYD-2      | zircon  | 165.38  | 13.23    | 209.50  | 43.51    | 3.63        | 219.53  | 0.21 | 145.73                | 3.14 | 0.74 | 43.18                  | 397.60  | 9.40  |
| z13LOYD-7      | zircon  | 105.75  | 8.46     | 149.24  | 34.36    | 1.00        | 157.16  | 0.23 | 61.95                 | 1.90 | 0.69 | 35.74                  | 1025.00 | 17.00 |
| z13LOYD-18     | zircon  | 285.18  | 22.81    | 137.40  | 72.91    | 0.57        | 154.18  | 0.53 | 178.54                | 3.35 | 0.74 | 44.34                  | 635.50  | 5.10  |
| z13LOYD-22     | zircon  | 235.80  | 18.86    | 87.72   | 55.68    | 0.61        | 100.54  | 0.63 | 88.21                 | 1.77 | 0.68 | 35.58                  | 1063.10 | 8.50  |
| z13LOYD-23     | zircon  | 181.58  | 14.53    | 283.65  | 100.77   | 2.21        | 306.86  | 0.36 | 209.25                | 1.83 | 0.69 | 36.23                  | 454.60  | 7.00  |
| z13LOYD-34     | zircon  | 126.54  | 10.12    | 33.08   | 32.55    | 0.68        | 40.57   | 0.98 | 19.24                 | 1.98 | 0.69 | 37.12                  | 1043.00 | 14.00 |
| z13LOYD-37     | zircon  | 177.65  | 14.21    | 53.31   | 14.25    | 0.23        | 56.59   | 0.27 | 38.73                 | 2.33 | 0.71 | 38.50                  | 2700.10 | 7.40  |
| z13LOYD-44     | zircon  | 479.23  | 38.34    | 84.09   | 22.83    | 0.39        | 89.35   | 0.27 | 166.28                | 2.06 | 0.70 | 37.21                  | 1037.60 | 8.90  |
| z13LOYD-52     | zircon  | 87.73   | 7.02     | 689.69  | 330.42   | 1.20        | 765.76  | 0.48 | 263.29                | 2.92 | 0.72 | 41.47                  | 101.00  | 1.10  |
| z13LOYD-60     | zircon  | 307.49  | 24.60    | 21.75   | 19.32    | 1.12        | 26.20   | 0.89 | 30.48                 | 1.94 | 0.69 | 36.90                  | 1034.00 | 25.00 |
| z13LOYD-62     | zircon  | 293.86  | 23.51    | 178.91  | 77.95    | 1.33        | 196.86  | 0.44 | 215.43                | 1.63 | 0.68 | 35.05                  | 1569.90 | 8.00  |
| z13LOYD-64     | zircon  | 96.54   | 7.72     | 423.84  | 75.08    | 1.14        | 441.13  | 0.18 | 170.18                | 3.08 | 0.74 | 43.14                  | 1510.10 | 7.40  |
| z13LOYD-78     | zircon  | 123.74  | 9.90     | 173.89  | 88.08    | 0.86        | 194.17  | 0.51 | 89.81                 | 1.87 | 0.69 | 36.41                  | 1726.30 | 8.20  |
| z13LOYD-81     | zircon  | 246.00  | 19.68    | 146.59  | 72.76    | 1.97        | 163.35  | 0.50 | 152.90                | 2.19 | 0.69 | 37.30                  | 1849.00 | 11.00 |
| z13LOYD-82     | zircon  | 291.72  | 23.34    | 60.81   | 59.32    | 0.49        | 74.47   | 0.98 | 80.24                 | 1.64 | 0.67 | 35.07                  | 2723.00 | 18.00 |
| z13LOYD-84     | zircon  | 217.46  | 17.40    | 141.38  | 54.88    | 1.06        | 154.02  | 0.39 | 125.13                | 1.79 | 0.68 | 35.64                  | 425.20  | 4.70  |
| z13LOYD-86     | zircon  | 262.09  | 20.97    | 37.20   | 30.30    | 0.43        | 44.17   | 0.81 | 43.75                 | 1.89 | 0.69 | 37.01                  | 1997.10 | 8.40  |
| z13LOYD-102    | zircon  | 188.67  | 15.09    | 424.88  | 104.28   | 1.11        | 448.89  | 0.25 | 311.26                | 1.71 | 0.67 | 34.15                  | 1946.00 | 7.30  |
| z13LOYD-124    | zircon  | 318.26  | 25.46    | 41.85   | 17.33    | 0.38        | 45.84   | 0.41 | 56.98                 | 2.85 | 0.71 | 39.23                  | 608.90  | 5.90  |
| z13LOYD-125    | zircon  | 290.27  | 23.22    | 31.87   | 16.59    | 17.31       | 35.77   | 0.52 | 40.28                 | 2.32 | 0.70 | 38.78                  | 1670.00 | 15.00 |
| z13MARAPOSI-01 | zircon  | 360.65  | 28.85    | 100.09  | 52.06    | 9.09        | 112.12  | 0.52 | 175.67                | 6.81 | 0.78 | 54.60                  | 1706.00 | 10.00 |
| z13MARAPOSI-03 | zircon  | 72.25   | 5.78     | 258.36  | 133.26   | 2.04        | 289.05  | 0.52 | 86.27                 | 4.85 | 0.76 | 49.10                  | 161.30  | 2.00  |
| z13MARAPOSI-05 | zircon  | 595.07  | 47.61    | 56.72   | 47.86    | 6.49        | 67.77   | 0.84 | 165.89                | 3.56 | 0.73 | 43.61                  | 1749.40 | 8.90  |
| z13MARAPOSI-06 | zircon  | 257.06  | 20.57    | 289.26  | 73.35    | 8.33        | 306.18  | 0.25 | 328.36                | 4.50 | 0.76 | 47.96                  | 1110.00 | 11.00 |
| z13MARAPOSI-14 | zircon  | 196.63  | 15.73    | 165.32  | 120.45   | 5.31        | 193.07  | 0.73 | 152.19                | 3.73 | 0.73 | 43.73                  | 247.60  | 2.20  |
| z13MARAPOSI-18 | zircon  | 239.20  | 19.14    | 202.26  | 52.72    | 4.88        | 214.42  | 0.26 | 205.85                | 2.93 | 0.73 | 42.63                  | 1433.30 | 8.70  |
| z13MARAPOSI-19 | zircon  | 183.96  | 14.72    | 253.19  | 72.60    | 17.21       | 269.98  | 0.29 | 196.16                | 2.76 | 0.72 | 41.21                  | 1730.40 | 7.30  |
| z13MARAPOSI-23 | zircon  | 65.71   | 5.26     | 102.18  | 38.86    | 6.67        | 111.16  | 0.38 | 30.02                 | 4.63 | 0.76 | 48.03                  | 1911.20 | 8.10  |
| z13MARAPOSI-26 | zircon  | 317.92  | 25.43    | 64.31   | 48.95    | 10.35       | 75.63   | 0.76 | 99.28                 | 3.94 | 0.75 | 46.67                  | 2614.00 | 24.00 |
| z13MARAPOSI-27 | zircon  | 285.50  | 22.84    | 117.14  | 24.36    | 5.29        | 122.77  | 0.21 | 139.58                | 2.91 | 0.72 | 41.12                  | 950.00  | 15.00 |
| z13MARAPOSI-33 | zircon  | 444.93  | 35.59    | 165.84  | 53.71    | 0.95        | 178.21  | 0.32 | 335.92                | 4.64 | 0.76 | 48.31                  | 1020.60 | 5.80  |
| z13MARAPOSI-37 | zircon  | 318.99  | 25.52    | 285.23  | 151.79   | 7.33        | 320.20  | 0.53 | 410.75                | 3.45 | 0.73 | 42.78                  | 452.80  | 2.60  |
| z13MARAPOSI-41 | zircon  | 461.15  | 36.89    | 160.23  | 66.19    | 7.75        | 175.51  | 0.41 | 335.88                | 4.27 | 0.74 | 45.26                  | 438.90  | 6.30  |
| z13MARAPOSI-50 | zircon  | 259.61  | 20.77    | 68.76   | 57.62    | 4.92        | 82.05   | 0.84 | 88.55                 | 4.70 | 0.76 | 48.48                  | 2067.10 | 7.50  |
| z13MARAPOSI-54 | zircon  | 74.93   | 5.99     | 999.86  | 271.91   | 15.86       | 1062.53 | 0.27 | 333.96                | 6.15 | 0.77 | 51.30                  | 74.50   | 1.70  |
| z13MARAPOSI-65 | zircon  | 76.81   | 6.14     | 138.49  | 37.47    | 5.33        | 147.14  | 0.27 | 47.25                 | 5.16 | 0.77 | 50.63                  | 1714.30 | 6.60  |
| z13MARAPOSI-69 | zircon  | 348.99  | 27.92    | 102.74  | 59.69    | 8.66        | 116.52  | 0.58 | 168.81                | 4.20 | 0.75 | 46.89                  | 2098.00 | 12.00 |
| z13MARAPOSI-77 | zircon  | 115.64  | 9.25     | 165.43  | 63.66    | 5.05        | 180.10  | 0.38 | 82.64                 | 3.05 | 0.73 | 42.56                  | 1708.00 | 11.00 |
| z13MARAPOSI-83 | zircon  | 70.22   | 5.62     | 104.45  | 44.02    | 5.98        | 114.61  | 0.42 | 32.54                 | 4.05 | 0.75 | 45.57                  | 77.00   | 1.50  |

|                 |        |        |       |        |        |       |        |      |        |      |      |       |         |       |
|-----------------|--------|--------|-------|--------|--------|-------|--------|------|--------|------|------|-------|---------|-------|
| z13MARAPOS1-100 | zircon | 326.93 | 26.15 | 141.27 | 73.04  | 7.58  | 158.12 | 0.52 | 211.32 | 3.49 | 0.74 | 44.80 | 415.90  | 3.80  |
| z13MARAPOS1-113 | zircon | 68.82  | 5.51  | 112.11 | 109.73 | 6.06  | 137.40 | 0.98 | 38.23  | 4.18 | 0.74 | 46.25 | 63.90   | 1.40  |
| z13MARAPOS1-116 | zircon | 137.48 | 11.00 | 190.16 | 53.83  | 12.35 | 202.62 | 0.28 | 113.20 | 3.75 | 0.75 | 45.34 | 1597.30 | 6.80  |
|                 |        |        |       |        |        |       |        |      |        |      |      |       |         |       |
| z13MEEI-1       | zircon | 91.56  | 7.32  | 829.14 | 498.26 | 7.26  | 943.88 | 0.60 | 322.86 | 2.02 | 0.69 | 36.66 | 1209.00 | 13.00 |
| z13MEEI-2       | zircon | 288.76 | 23.10 | 147.48 | 84.91  | 1.76  | 167.03 | 0.58 | 176.61 | 1.52 | 0.67 | 33.97 | 656.40  | 5.60  |
| z13MEEI-4       | zircon | 96.46  | 7.72  | 152.53 | 57.87  | 2.00  | 165.86 | 0.38 | 57.63  | 1.41 | 0.66 | 33.32 | 1246.00 | 14.00 |
| z13MEEI-6       | zircon | 96.78  | 7.74  | 328.11 | 189.79 | 0.64  | 371.80 | 0.58 | 145.50 | 4.38 | 0.74 | 45.62 | 87.50   | 1.30  |
| z13MEEI-21      | zircon | 344.46 | 27.56 | 55.38  | 30.46  | 0.46  | 62.40  | 0.55 | 85.88  | 2.78 | 0.72 | 41.83 | 637.70  | 6.30  |
| z13MEEI-22      | zircon | 344.30 | 27.54 | 122.87 | 41.97  | 1.61  | 132.54 | 0.34 | 169.91 | 1.66 | 0.68 | 34.58 | 410.70  | 5.00  |
| z13MEEI-25      | zircon | 274.62 | 21.97 | 230.18 | 112.20 | 3.44  | 256.02 | 0.49 | 267.29 | 2.02 | 0.69 | 37.03 | 1039.70 | 8.20  |
| z13MEEI-28      | zircon | 167.82 | 13.43 | 133.51 | 99.71  | 0.44  | 156.46 | 0.75 | 95.46  | 1.59 | 0.67 | 34.19 | 181.80  | 2.30  |
| z13MEEI-36      | zircon | 121.23 | 9.70  | 89.97  | 66.98  | 0.79  | 105.39 | 0.74 | 47.29  | 1.78 | 0.68 | 35.86 | 2727.00 | 12.00 |
| z13MEEI-44      | zircon | 90.37  | 7.23  | 573.76 | 218.99 | 0.75  | 624.17 | 0.38 | 203.66 | 1.49 | 0.67 | 33.52 | 93.50   | 0.89  |
| z13MEEI-47      | zircon | 331.82 | 26.55 | 337.11 | 127.16 | 5.21  | 366.41 | 0.38 | 491.59 | 3.03 | 0.73 | 43.02 | 1052.00 | 12.00 |
| z13MEEI-50      | zircon | 303.56 | 24.29 | 191.63 | 62.24  | 1.33  | 205.96 | 0.32 | 245.46 | 2.45 | 0.71 | 39.70 | 1392.80 | 5.30  |
| z13MEEI-86      | zircon | 308.80 | 24.70 | 117.97 | 51.60  | 1.36  | 129.86 | 0.44 | 157.83 | 2.91 | 0.71 | 40.18 | 1837.40 | 6.60  |
| z13MEEI-90      | zircon | 83.21  | 6.66  | 136.99 | 59.74  | 77.54 | 151.13 | 0.44 | 51.06  | 3.78 | 0.75 | 45.87 | 1831.10 | 6.10  |
| z13MEEI-101     | zircon | 67.14  | 5.37  | 97.45  | 33.56  | 1.10  | 105.18 | 0.34 | 27.14  | 2.45 | 0.71 | 39.17 | 1751.90 | 7.30  |
| z13MEEI-103     | zircon | 203.73 | 16.30 | 115.49 | 65.60  | 1.21  | 130.60 | 0.57 | 108.64 | 3.77 | 0.75 | 45.97 | 1671.00 | 12.00 |
| z13MEEI-116     | zircon | 84.73  | 6.78  | 53.60  | 23.24  | 0.66  | 58.95  | 0.43 | 19.15  | 2.44 | 0.71 | 38.94 | 2092.00 | 11.00 |
