# Supplementary material
Source: publisher figshare collection journal article supplement (https://gsapubs.figshare.com/articles/dataset/_/15145527)
Supplement: Supplementary file 3 [file 1]

**Table 1. Sample location GPS coordinates.**

| <u>Sample ID</u> | <u>Latitude</u> | <u>Longitude</u> | <u>Formation Name</u> |
|------------------|-----------------|------------------|-----------------------|
|------------------|-----------------|------------------|-----------------------|

**Price River Canyon \_Castle Valley, UT**

|            |          |          |                      |
|------------|----------|----------|----------------------|
| 13PRUC     | 39.76348 | -110.899 | Bluecastle Tongue    |
| 11Upr01    | 39.76096 | -110.894 | Middle Castlegate    |
| 11Upr02    | 39.75668 | -110.89  | Middle Castlegate    |
| 11Upr03    | 39.75362 | -110.888 | Castlegate Sandstone |
| 11Upr04    | 39.75014 | -110.885 | Aberdeen Mbr         |
| 11Upr05    | 39.73889 | -110.875 | Spring Canyon Mbr    |
| 11Upr06    | 39.72698 | -110.868 | Spring Canyon Mbr    |
| 11Upr07    | 39.71235 | -110.868 | Storrs Sandstone     |
| Panther T. | 39.71214 | -110.869 | Panther Tongue       |

**North San Rafael Swell, UT**

|          |          |          |                  |
|----------|----------|----------|------------------|
| 11Uccr04 | 39.70181 | -110.685 | Kenilworth Mbr   |
| 13EMERY  | 39.65233 | -110.908 | Emery Sandstone  |
| 11Uccf03 | 39.54602 | -110.661 | Emery Sandstone  |
| 11Uccf04 | 39.54313 | -110.659 | Ferron Sandstone |
| 11Uccf05 | 39.53673 | -110.621 | Ferron Sandstone |

**Sunnyside Canyon, UT**

|         |          |          |                      |
|---------|----------|----------|----------------------|
| 11Uss01 | 39.55665 | -110.382 | Kenilworth Mbr       |
| 11Uss02 | 39.56005 | -110.375 | Sunnyside Mbr        |
| 11Uss03 | 39.56826 | -110.372 | Sunnyside Mbr        |
| 11Uss04 | 39.57516 | -110.371 | Castlegate Sandstone |
| 11Uss05 | 39.58104 | -110.368 | Castlegate Sandstone |
| 11Uss06 | 39.58643 | -110.371 | Middle castlegate    |
| 11Uss07 | 39.59296 | -110.373 | Bluecastle Tongue    |

**Green River \_Tusher Canyon Area, UT**

|            |          |          |                      |
|------------|----------|----------|----------------------|
| Bluecastle | 38.99797 | -109.923 | Bluecastle Tongue    |
| 13GRT-01   | 39.09672 | -110.046 | Sunnyside Mbr        |
| 13GRT-02   | 39.1     | -110.034 | Grassy Mbr           |
| 13GRT-03   | 39.10001 | -110.034 | Desert Mbr           |
| 13GRT-04   | 39.09767 | -110.024 | Castlegate Sandstone |
| 13WSUN     | 39.25538 | -110.282 | Sunnyside Mbr        |
| 13WKEN     | 39.25608 | -110.28  | Kenilworth Mbr       |

**Mount Garfield, CO**

|           |          |          |                       |
|-----------|----------|----------|-----------------------|
| 13GJR-01  | 39.12875 | -108.386 | Rollins Sandstone Mbr |
| 13GJCOCE- | 39.12814 | -108.388 | Cozzette Mbr          |
| 13GJCO-01 | 39.12675 | -108.392 | Concoran Mbr          |

**Near Rangely, CO**

|            |          |          |                  |
|------------|----------|----------|------------------|
| Sample No. | 40.07922 | -108.89  | Loyd Sandstone   |
| Sample No. | 40.20157 | -108.862 | Sego Sandstone   |
| Sample No. | 39.94463 | -108.758 | Neslen Formation |

**Near Meeker, CO**

|          |          |          |                   |
|----------|----------|----------|-------------------|
| 13MORA-1 | 40.28664 | -107.646 | Marapos Sandstone |
| 13MEE1   | 40.08482 | -107.854 | Meeker Sandstone  |
