# Supplementary material
Source: publisher figshare collection journal article supplement (https://gsapubs.figshare.com/articles/dataset/_/15145527)
Supplement: Supplementary file 4 [file 1]

Table 4a. Below are the K-S test p and D values between all Book Cliffs DZ U-Pb samples in this study. The comparison between DZ U-Pb ages was made without excluding volcanic arc DZ -U-Pb ages. Highlighted in yellow the p values above 0.05.

| All DZ U_Pb AGES IN THIS STUDY |         | P>.05 = same source |          |          |           |          |          |          |          |          |          |             |          |          |          |          |          |            |          |          |          |          |          |          |          |          |          |          |          |          |           |          |          |     |  |
|--------------------------------|---------|---------------------|----------|----------|-----------|----------|----------|----------|----------|----------|----------|-------------|----------|----------|----------|----------|----------|------------|----------|----------|----------|----------|----------|----------|----------|----------|----------|----------|----------|----------|-----------|----------|----------|-----|--|
| K-S test p value               |         |                     |          |          |           |          |          |          |          |          |          |             |          |          |          |          |          |            |          |          |          |          |          |          |          |          |          |          |          |          |           |          |          |     |  |
| 13PRUC                         | 11UPR01 | 11UPR02             | 11UPR03  | 11UPR04  | 11UPR05   | 11UPR06  | 11UPR07  | Panther  | 11UCCR04 | Emery    | Ferron   | 11USS01     | 11USS02  | 11USS04  | 11USS05  | 11USS06  | 11USS07  | Bluecastle | 13GRT01  | 13GRT02  | 13GRT03  | 13GRT04  | 13WSUN   | 13WKEN   | 13GIR01  | GICOC01  | 13GIC001 | S3NESLEN | S2SEGO   | S1LOYD   | 13MARAP01 | 13MEEI   |          |     |  |
| 13PRUC                         | 1       | 0.003213            | 0.003922 | 0.18524  | 0.0072963 | 0.011779 | 0.000976 | 0.060101 | 1.56E-06 | 0.741293 | 2.41E-08 | 2.49767E-13 | 0.000127 | 0.013936 | 7.59E-06 | 0.001261 | 0.121609 | 0.099726   | 3.55E-10 | 0.00041  | 0.293998 | 0.000317 | 0.108995 | 0.012272 | 0.003083 | 1.59E-06 | 3.39E-05 | 0.006622 | 0.007629 | 0.008801 | 9.89E-05  | 7.42E-07 | 7.67E-07 |     |  |
| 11UPR01                        |         | 1                   | 0.179584 | 0.171795 | 0.8980651 | 0.632979 | 0.453949 | 0.76419  | 0.054286 | 0.002254 | 0.01209  | 2.04125E-07 | 0.401103 | 0.833607 | 0.132484 | 0.309726 | 0.133714 | 0.216726   | 0.000116 | 0.054482 | 0.064713 | 0.637561 | 0.005899 | 0.84007  | 0.373933 | 8.21E-05 | 0.000286 | 0.058026 | 0.078086 | 0.252623 | 0.307644  | 3.31E-05 | 8.09E-05 |     |  |
| 11UPR02                        |         |                     | 1        | 0.420819 | 0.4678519 | 0.886173 | 0.158356 | 0.889963 | 0.022187 | 0.002675 | 0.000656 | 6.4E-09     | 0.094278 | 0.67134  | 0.009022 | 0.008394 | 0.693697 | 0.437488   | 5.26E-06 | 0.007217 | 0.104015 | 0.055472 | 0.010548 | 0.319566 | 0.087924 | 1.2E-05  | 8.48E-05 | 0.011922 | 0.032053 | 0.087924 | 0.03041   | 2.23E-06 | 3.13E-06 |     |  |
| 11UPR03                        |         |                     |          | 1        | 0.2277823 | 0.385903 | 0.041412 | 0.528637 | 0.00051  | 0.147653 | 0.000109 | 5.6762E-09  | 0.093626 | 0.408825 | 0.005071 | 0.117205 | 0.502803 | 0.406623   | 8.84E-06 | 0.00998  | 0.679904 | 0.0531   | 0.083436 | 0.293887 | 0.095132 | 9.61E-06 | 3.86E-05 | 0.010815 | 0.029748 | 0.082609 | 0.036235  | 1.75E-06 | 4.77E-06 |     |  |
| 11UPR04                        |         |                     |          |          | 1         | 0.749829 | 0.148942 | 0.544383 | 0.079826 | 0.005163 | 0.002335 | 4.1188E-09  | 0.128116 | 0.775702 | 0.068203 | 0.094894 | 0.280778 | 0.179921   | 3.98E-06 | 0.006476 | 0.088399 | 0.288242 | 0.011647 | 0.639124 | 0.082609 | 9.61E-06 | 3.86E-05 | 0.010815 | 0.029562 | 0.058577 | 0.102034  | 1.75E-06 | 2.47E-06 |     |  |
| 11UPR05                        |         |                     |          |          |           | 1        | 0.318893 | 0.985439 | 0.113486 | 0.012054 | 0.024487 | 1.73558E-07 | 0.281681 | 0.946724 | 0.158862 | 0.230207 | 0.832674 | 0.241984   | 5.39E-05 | 0.05107  | 0.065412 | 0.070153 | 0.008005 | 0.558224 | 0.215475 | 7.31E-05 | 0.000258 | 0.038348 | 0.090771 | 0.215475 | 0.130964  | 2.96E-05 | 7.01E-05 |     |  |
| 11UPR06                        |         |                     |          |          |           |          | 1        | 0.218469 | 0.575252 | 0.000553 | 0.345925 | 0.000365603 | 0.84357  | 0.36281  | 0.692007 | 0.862075 | 0.030848 | 0.014968   | 0.009371 | 0.751728 | 0.013142 | 0.862416 | 0.000605 | 0.54087  | 0.921207 | 0.029401 | 0.045848 | 0.13324  | 0.020962 | 0.864867 | 0.864603  | 0.00995  | 0.011931 |     |  |
| 11UPR07                        |         |                     |          |          |           |          |          | 1        | 0.025033 | 0.0635   | 0.005808 | 4.6029E-07  | 0.215691 | 0.945388 | 0.05145  | 0.385772 | 0.875955 | 0.624614   | 9.89E-05 | 0.050731 | 0.303101 | 0.150567 | 0.044587 | 0.496343 | 0.240492 | 0.00022  | 0.000727 | 0.074819 | 0.165311 | 0.353917 | 0.14768   | 4.9E-05  | 6.53E-05 |     |  |
| Panther                        |         |                     |          |          |           |          |          |          | 1        | 1.91E-06 | 0.197003 | 2.80757E-05 | 0.205437 | 0.101011 | 0.935923 | 0.257133 | 0.007381 | 0.000484   | 0.001638 | 0.231466 | 4.04E-05 | 0.217318 | 4.29E-07 | 0.041357 | 0.153575 | 0.00111  | 0.003219 | 0.094662 | 0.01385  | 0.082445 | 0.516238  | 0.000499 | 0.001104 |     |  |
| 11UCCR04                       |         |                     |          |          |           |          |          |          |          | 1        | 2.35E-08 | 5.78468E-13 | 8.46E-05 | 0.020874 | 8.02E-06 | 0.00069  | 0.122279 | 0.098757   | 2.33E-10 | 0.000667 | 0.282501 | 0.000207 | 0.030772 | 0.012011 | 0.003161 | 8.68E-07 | 4.75E-05 | 0.006684 | 0.020874 | 0.004961 | 8.52E-05  | 3.88E-06 | 4.38E-06 |     |  |
| Emery                          |         |                     |          |          |           |          |          |          |          |          | 1        | 0.001639067 | 0.061176 | 0.009858 | 0.034686 | 0.191978 | 0.004063 | 1.09E-05   | 0.021105 | 0.412419 | 7.51E-06 | 0.051095 | 1.88E-08 | 0.019153 | 0.107415 | 0.082452 | 0.139334 | 0.025942 | 0.00237  | 0.06003  | 0.699501  | 0.006737 | 0.07822  |     |  |
| Ferron                         |         |                     |          |          |           |          |          |          |          |          |          | 1           | 0.000313 | 6.61E-06 | 0.000248 | 0.001632 | 1.03E-06 | 3.28E-09   | 0.097459 | 0.005396 | 1.76E-10 | 5.52E-05 | 4.01E-14 | 2.39E-07 | 0.000217 | 0.028581 | 0.007633 | 0.000157 | 3.41E-06 | 8.26E-05 | 0.001096  | 0.00012  | 0.026334 |     |  |
| 11USS01                        |         |                     |          |          |           |          |          |          |          |          |          |             | 1        | 0.22364  | 0.337615 | 0.877286 | 0.021196 | 0.074018   | 0.013761 | 0.47061  | 0.00533  | 0.793893 | 0.000434 | 0.255    | 0.819359 | 0.032993 | 0.073258 | 0.179459 | 0.030502 | 0.801362 | 0.835284  | 0.016602 | 0.019719 |     |  |
| 11USS02                        |         |                     |          |          |           |          |          |          |          |          |          |             |          | 1        | 0.1002   | 0.56082  | 0.563757 | 0.19482    | 0.186914 | 0.072527 | 0.412527 | 0.009121 | 0.878192 | 0.600274 | 0.002957 | 0.0081   | 0.32083  | 0.459738 | 0.732307 | 0.194526 | 0.000797  | 0.001008 |          |     |  |
| 11USS04                        |         |                     |          |          |           |          |          |          |          |          |          |             |          |          | 1        | 0.562645 | 0.041287 | 0.000587   | 0.001069 | 0.654487 | 0.000301 | 0.36435  | 8.68E-06 | 0.085495 | 0.500318 | 0.009188 | 0.015484 | 0.160956 | 0.027892 | 0.566091 | 0.561476  | 0.009108 | 0.01155  |     |  |
| 11USS05                        |         |                     |          |          |           |          |          |          |          |          |          |             |          |          |          | 1        | 0.216143 | 0.10414    | 0.01407  | 0.669833 | 0.022387 | 0.001866 | 0.291232 | 0.98076  | 0.024415 | 0.054654 | 0.121151 | 0.097174 | 0.596967 | 0.815039 | 0.00957   | 0.023529 |          |     |  |
| 11USS06                        |         |                     |          |          |           |          |          |          |          |          |          |             |          |          |          |          | 1        | 0.496354   | 1.25E-05 | 0.040416 | 0.187048 | 0.038419 | 0.0635   | 0.138143 | 0.050622 | 0.00002  | 0.000717 | 0.075463 | 0.165311 | 0.187579 | 0.012693  | 8.86E-05 | 0.000124 |     |  |
| 11USS07                        |         |                     |          |          |           |          |          |          |          |          |          |             |          |          |          |          |          | 1          | 8.42E-06 | 0.010228 | 0.524542 | 0.063932 | 0.387891 | 0.312701 | 0.096934 | 4.02E-05 | 0.002919 | 0.040188 | 0.294038 | 0.1323   | 0.014478  | 0.005993 | 0.000412 |     |  |
| Bluecastle                     |         |                     |          |          |           |          |          |          |          |          |          |             |          |          |          |          |          |            | 1        | 0.014933 | 3.15E-07 | 0.004448 | 6.17E-10 | 8.85E-05 | 0.007346 | 0.009966 | 0.00752  | 0.000532 | 2.34E-05 | 0.00184  | 0.013026  | 0.001788 | 0.017888 |     |  |
| 13GRT01                        |         |                     |          |          |           |          |          |          |          |          |          |             |          |          |          |          |          |            |          | 1        | 0.004368 | 0.587985 | 0.000244 | 0.054315 | 0.750711 | 0.067265 | 0.136473 | 0.235969 | 0.030312 | 0.598918 | 0.784136  | 0.065582 | 0.266734 |     |  |
| 13GRT02                        |         |                     |          |          |           |          |          |          |          |          |          |             |          |          |          |          |          |            |          |          | 1        | 0.012061 | 0.503605 | 0.906623 | 0.032448 | 4.19E-05 | 0.00067  | 0.040914 | 0.032966 | 0.090623 | 0.023228  | 2.32E-05 | 9.52E-06 |     |  |
| 13GRT03                        |         |                     |          |          |           |          |          |          |          |          |          |             |          |          |          |          |          |            |          |          |          | 1        | 0.000609 | 0.80689  | 0.986764 | 0.006724 | 0.011414 | 0.104148 | 0.103369 | 0.600967 | 0.615607  | 0.003266 | 0.006154 |     |  |
| 13GRT04                        |         |                     |          |          |           |          |          |          |          |          |          |             |          |          |          |          |          |            |          |          |          |          | 1        | 0.008005 | 0.001973 | 4.26E-07 | 8.79E-05 | 0.003974 | 0.030772 | 0.012311 | 0.000104  | 1.22E-05 | 8.43E-06 |     |  |
| 13WSUN                         |         |                     |          |          |           |          |          |          |          |          |          |             |          |          |          |          |          |            |          |          |          |          |          | 1        | 0.00069  | 0.000755 | 0.146319 | 0.126935 | 0.558224 | 0.119577 | 0.000297  | 0.000339 |          |     |  |
| 13WKEN                         |         |                     |          |          |           |          |          |          |          |          |          |             |          |          |          |          |          |            |          |          |          |          |          |          | 1        | 0.011582 | 0.012684 | 0.669295 | 0.669295 | 0.006348 | 0.015252  |          |          |     |  |
| 13GIR01                        |         |                     |          |          |           |          |          |          |          |          |          |             |          |          |          |          |          |            |          |          |          |          |          |          |          | 1        | 0.48104  | 0.013096 | 0.030317 | 0.044246 | 0.583441  | 0.314914 |          |     |  |
| GICOC01                        |         |                     |          |          |           |          |          |          |          |          |          |             |          |          |          |          |          |            |          |          |          |          |          |          |          |          | 1        | 0.268121 | 0.111149 | 0.005254 | 0.071585  | 0.52374  | 0.192485 |     |  |
| 13GIC001                       |         |                     |          |          |           |          |          |          |          |          |          |             |          |          |          |          |          |            |          |          |          |          |          |          |          |          |          | 1        | 0.536255 | 0.428026 | 0.073788  | 0.107112 | 0.112166 |     |  |
| S3NESLEN                       |         |                     |          |          |           |          |          |          |          |          |          |             |          |          |          |          |          |            |          |          |          |          |          |          |          |          |          |          | 1        | 0.144586 | 0.026694  | 0.044108 | 0.081062 |     |  |
| S2SEGO                         |         |                     |          |          |           |          |          |          |          |          |          |             |          |          |          |          |          |            |          |          |          |          |          |          |          |          |          |          |          | 1        | 0.695102  | 0.00249  | 0.033306 |     |  |
| S1LOYD                         |         |                     |          |          |           |          |          |          |          |          |          |             |          |          |          |          |          |            |          |          |          |          |          |          |          |          |          |          |          |          | 1         | 0.019268 | 0.022742 |     |  |
| 13MARAP01                      |         |                     |          |          |           |          |          |          |          |          |          |             |          |          |          |          |          |            |          |          |          |          |          |          |          |          |          |          |          |          |           | 1        | 0.129712 |     |  |
| 13MEEI                         |         |                     |          |          |           |          |          |          |          |          |          |             |          |          |          |          |          |            |          |          |          |          |          |          |          |          |          |          |          |          |           |          | 1        |     |  |
|                                |         | 0                   | 0        | 1        | 3         | 3        | 4        | 4        | 4        | 3        | 2        | 0           | 9        | 9        | 9        | 12       | 10       | 12         | 1        | 10       | 11       | 15       | 5        | 16       | 18       | 2        | 5        | 15       | 12       | 22       | 18        | 4        | 7        | 253 |  |
| K-S test D statistic           |         |                     |          |          |           |          |          |          |          |          |          |             |          |          |          |          |          |            |          |          |          |          |          |          |          |          |          |          |          |          |           |          |          |     |  |
| 13PRUC                         | 11UPR01 | 11UPR02             | 11UPR03  | 11UPR04  | 11UPR05   | 11UPR06  | 11UPR07  | Panther  | 11UCCR04 | Emery    | Ferron   | 11USS01     | 11USS02  | 11USS04  | 11USS05  | 11USS06  | 11USS07  | Bluecastle | 13GRT01  | 13GRT02  | 13GRT03  | 13GRT04  | 13WSUN   | 13WKEN   | 13GIR01  | GICOC01  | 13GIC001 | S3NESLEN | S2SEGO   | S1LOYD   | 13MARAP01 | 13MEEI   |          |     |  |
| 13PRUC                         | 0       | 0.226803            | 0.22278  | 0.136459 | 0.2096393 | 0.201748 | 0.246373 | 0.166333 | 0.339071 | 0.085667 | 0.331419 | 0.430524272 | 0.275016 | 0.198    | 0.318726 | 0.247193 | 0.148667 | 0.156571   | 0.427469 | 0.257836 | 0.127238 | 0.262281 | 0.151333 | 0.200941 | 0.226555 | 0.331607 | 0.292683 | 0.213675 | 0.209667 | 0.207395 | 0.282783  | 0.344828 | 0.345965 |     |  |
| 11UPR01                        |         | 0                   | 0.140736 | 0.140886 | 0.0728597 | 0.095525 | 0.109952 | 0.085256 | 0.174451 | 0.235256 | 0.179186 | 0.323458634 | 0.113703 | 0.079274 | 0.150972 | 0.126166 | 0.148504 | 0.124542   | 0.286211 | 0.17073  | 0.172161 | 0.094794 | 0.217949 | 0.082166 | 0.116929 | 0.285834 | 0.267042 | 0.17094  | 0.162607 | 0.125332 | 0.124712  | 0.302093 | 0.290823 |     |  |
| 11UPR02                        |         |                     | 0        | 0.111698 | 0.1076688 | 0.07442  | 0.144068 | 0.07387  | 0.194461 | 0.23178  | 0.223923 | 0.355603094 | 0.156849 | 0.092232 | 0.212539 | 0.160162 | 0.090537 | 0.112591   | 0.327809 | 0.212837 | 0.16021  | 0.170262 | 0.206356 | 0.122134 | 0.159593 | 0.311198 | 0.284208 | 0.205201 | 0.183192 | 0.159593 | 0.186293  | 0.336353 | 0.333631 |     |  |
| 11UPR03                        |         |                     |          | 0        | 0.1311475 | 0.114616 | 0.176716 | 0.102322 | 0.261563 | 0.144262 | 0.245035 | 0.353016075 | 0.155738 | 0.112295 | 0.221819 | 0.154234 | 0.104372 | 0.114461   | 0.318584 | 0.204918 | 0.093989 | 0.169896 | 0.15929  | 0.123915 | 0.1562   |          |          |          |          |          |           |          |          |     |  |

Table 4b. Below are the K-S test p and D values between all Book Cliffs DZ U-Pb samples in this study. The DZ U-Pb ages for all samples were compared excluding volcanic arc DZ -U-Pb ages. Highlighted in yellow the p values above 0.05.

| P>.05 = same source  |         |          |          |          |          |          |          |          |          |          |          |          |          |          |          |          |          |            |          |          |           |          |          |          |          |          |          |          |          |          |          |          |          |  |
|----------------------|---------|----------|----------|----------|----------|----------|----------|----------|----------|----------|----------|----------|----------|----------|----------|----------|----------|------------|----------|----------|-----------|----------|----------|----------|----------|----------|----------|----------|----------|----------|----------|----------|----------|--|
| K-S test p value     |         |          |          |          |          |          |          |          |          |          |          |          |          |          |          |          |          |            |          |          |           |          |          |          |          |          |          |          |          |          |          |          |          |  |
| 13PRUC               | 11UPR01 | 11UPR02  | 11UPR03  | 11UPR04  | 11UPR05  | 11UPR06  | 11UPR07  | Panthert | 11UCCR04 | Emery    | Ferron   | 11USS01  | 11USS02  | 11USS04  | 11USS05  | 11USS06  | 11USS07  | Bluecastle | 13GRT01  | 13GRT02  | 13GRT03   | 13GRT04  | 13WSUN   | 13WKEN   | 13GJR01  | GJCOCE01 | 13GJC001 | S3NESLEN | S2SEGO   | S1LOYD   | 13MARAPC | 13MEEI   |          |  |
| 13PRUC               | 1       | 0.007998 | 0.005326 | 0.18524  | 0.007296 | 0.027609 | 0.045642 | 0.185689 | 3.31E-05 | 0.683599 | 0.000521 | 0.000335 | 0.023527 | 0.192859 | 0.001938 | 0.07194  | 0.228932 | 0.444811   | 2.3E-06  | 0.321896 | 0.518293  | 0.015079 | 0.193224 | 0.066099 | 0.167775 | 0.36911  | 0.164139 | 0.209225 | 0.34313  | 0.203143 | 0.02221  | 0.00267  | 0.37872  |  |
| 11UPR01              |         | 1        | 0.226148 | 0.204892 | 0.946952 | 0.618527 | 0.838422 | 0.679451 | 0.117457 | 0.004077 | 0.738405 | 0.572707 | 0.920759 | 0.533394 | 0.744325 | 0.817792 | 0.089955 | 0.096397   | 0.055038 | 0.325146 | 0.041414  | 0.745097 | 0.003572 | 0.729981 | 0.733147 | 0.003109 | 0.002668 | 0.015254 | 0.002487 | 0.510834 | 0.961976 | 8.68E-07 | 0.0235   |  |
| 11UPR02              |         |          | 1        | 0.483197 | 0.417473 | 0.974393 | 0.709551 | 0.61952  | 0.082993 | 0.002541 | 0.308934 | 0.27558  | 0.543949 | 0.466527 | 0.249288 | 0.909102 | 0.412531 | 0.098526   | 0.005412 | 0.411486 | 0.042231  | 0.238537 | 0.003462 | 0.496303 | 0.394307 | 0.046854 | 0.007461 | 0.018438 | 0.002446 | 0.52189  | 0.290406 | 6.59E-05 | 0.06001  |  |
| 11UPR03              |         |          |          | 1        | 0.227782 | 0.605646 | 0.478232 | 0.689352 | 0.00467  | 0.116557 | 0.136541 | 0.033243 | 0.559233 | 0.754534 | 0.189161 | 0.343818 | 0.590835 | 0.388692   | 0.00342  | 0.859044 | 0.351205  | 0.193826 | 0.227558 | 0.474429 | 0.423678 | 0.401029 | 0.047998 | 0.084933 | 0.016376 | 0.959429 | 0.388763 | 0.002343 | 0.252597 |  |
| 11UPR04              |         |          |          |          | 1        | 0.706335 | 0.855359 | 0.468185 | 0.282503 | 0.003636 | 0.92817  | 0.747448 | 0.350282 | 0.363536 | 0.881671 | 0.867129 | 0.114873 | 0.015564   | 0.028586 | 0.242068 | 0.024815  | 0.48117  | 0.002559 | 0.545165 | 0.594546 | 0.003442 | 0.005237 | 0.005677 | 0.000691 | 0.522144 | 0.97153  | 2.91E-06 | 0.030157 |  |
| 11UPR05              |         |          |          |          |          | 1        | 0.938138 | 0.946421 | 0.225379 | 0.020134 | 0.949135 | 0.667756 | 0.678163 | 0.781142 | 0.894119 | 0.875502 | 0.69228  | 0.052951   | 0.002917 | 0.802798 | 0.038701  | 0.169675 | 0.004786 | 0.667486 | 0.549322 | 0.041264 | 0.034475 | 0.06784  | 0.014886 | 0.738898 | 0.499282 | 0.000133 | 0.22746  |  |
| 11UPR06              |         |          |          |          |          |          | 1        | 0.712953 | 0.143767 | 0.035034 | 0.631988 | 0.454268 | 0.734651 | 0.594093 | 0.572893 | 0.775607 | 0.185179 | 0.072083   | 0.0199   | 0.582308 | 0.170543  | 0.700494 | 0.024213 | 0.951    | 0.92331  | 0.060218 | 0.014161 | 0.008573 | 0.001371 | 0.939864 | 0.890161 | 7.6E-05  | 0.042008 |  |
| 11UPR07              |         |          |          |          |          |          |          | 1        | 0.036475 | 0.152021 | 0.388801 | 0.191374 | 0.492332 | 0.997899 | 0.357937 | 0.702074 | 0.858984 | 0.302613   | 0.005983 | 0.871547 | 0.304785  | 0.260372 | 0.051208 | 0.509854 | 0.504657 | 0.106461 | 0.021291 | 0.155086 | 0.036134 | 0.995257 | 0.457302 | 0.000157 | 0.196503 |  |
| Panthert             |         |          |          |          |          |          |          | 1        | 2.58E-05 | 0.47989  | 0.877522 | 0.022728 | 0.045197 | 0.621085 | 0.05016  | 0.011083 | 0.000167 | 0.051679   | 0.023233 | 7.58E-05 | 0.072985  | 1.24E-06 | 0.046014 | 0.025603 | 0.018207 | 0.000381 | 0.000652 | 4.86E-05 | 0.01073  | 0.123702 | 1.54E-05 | 0.006189 |          |  |
| 11UCCR04             |         |          |          |          |          |          |          |          | 1        | 0.000311 | 0.000303 | 0.010062 | 0.212271 | 0.001159 | 0.031349 | 0.197833 | 0.412121 | 1.08E-06   | 0.285775 | 0.414933 | 0.007669  | 0.04671  | 0.043809 | 0.102771 | 0.192033 | 0.065155 | 0.113811 | 0.231767 | 0.144697 | 0.015875 | 0.001015 | 0.557683 |          |  |
| Emery                |         |          |          |          |          |          |          |          |          | 1        | 0.575143 | 0.144499 | 0.174464 | 0.998737 | 0.519002 | 0.176102 | 0.001576 | 0.007563   | 0.189263 | 0.00418  | 0.349007  | 0.000103 | 0.584095 | 0.337005 | 0.019021 | 0.001435 | 0.003102 | 0.000473 | 0.205723 | 0.736507 | 1.06E-05 | 0.016522 |          |  |
| Ferron               |         |          |          |          |          |          |          |          |          |          | 1        | 0.15556  | 0.202559 | 0.463476 | 0.308836 | 0.06096  | 0.003092 | 0.077972   | 0.125828 | 0.000709 | 0.403021  | 1.36E-05 | 0.230318 | 0.126491 | 0.005134 | 0.001111 | 0.002922 | 0.000293 | 0.066212 | 0.512978 | 1.05E-06 | 0.012844 |          |  |
| 11USS01              |         |          |          |          |          |          |          |          |          |          |          | 1        | 0.414829 | 0.21605  | 0.887868 | 0.14151  | 0.257068 | 0.022179   | 0.295774 | 0.06798  | 0.857856  | 0.018033 | 0.86954  | 0.857774 | 0.036118 | 0.009732 | 0.014891 | 0.002586 | 0.853256 | 0.90941  | 4.42E-05 | 0.043525 |          |  |
| 11USS02              |         |          |          |          |          |          |          |          |          |          |          |          | 1        | 0.222627 | 0.905323 | 0.80337  | 0.225712 | 0.003451   | 0.871825 | 0.217909 | 0.436878  | 0.047403 | 0.67308  | 0.719966 | 0.103919 | 0.012646 | 0.223135 | 0.114479 | 0.923485 | 0.515468 | 0.000365 | 0.245111 |          |  |
| 11USS04              |         |          |          |          |          |          |          |          |          |          |          |          |          | 1        | 0.51915  | 0.238892 | 0.003272 | 0.014229   | 0.188456 | 0.006294 | 0.0404575 | 0.000426 | 0.453445 | 0.468242 | 0.035787 | 0.002692 | 0.000876 | 0.00166  | 0.257547 | 8.66E-05 | 0.035111 |          |          |  |
| 11USS05              |         |          |          |          |          |          |          |          |          |          |          |          |          |          | 1        | 0.650438 | 0.311086 | 0.02724    | 0.385377 | 0.15452  | 0.828911  | 0.042057 | 0.719764 | 0.966337 | 0.012899 | 0.007266 | 0.018536 | 0.76704  | 0.871282 | 1.13E-05 | 0.092431 |          |          |  |
| 11USS06              |         |          |          |          |          |          |          |          |          |          |          |          |          |          |          | 1        | 0.233157 | 0.000446   | 0.461003 | 0.173656 | 0.096913  | 0.047024 | 0.140739 | 0.144361 | 0.063169 | 0.025699 | 0.523633 | 0.116176 | 0.519546 | 0.073985 | 9.19E-05 | 0.49519  |          |  |
| 11USS07              |         |          |          |          |          |          |          |          |          |          |          |          |          |          |          |          | 1        | 0.000171   | 0.372487 | 0.789908 | 0.117197  | 0.333661 | 0.155067 | 0.29692  | 0.106438 | 0.056387 | 0.116216 | 0.043299 | 0.385033 | 0.136124 | 0.000466 | 0.294458 |          |  |
| Bluecastle           |         |          |          |          |          |          |          |          |          |          |          |          |          |          |          |          |          | 1          | 0.002379 | 4.64E-05 | 0.038641  | 6.29E-07 | 0.014762 | 0.014439 | 6.37E-05 | 5.06E-06 | 2.4E-05  | 1.49E-06 | 0.003661 | 0.013239 | 2.85E-07 | 0.000112 |          |  |
| 13GRT01              |         |          |          |          |          |          |          |          |          |          |          |          |          |          |          |          |          |            | 1        | 0.39952  | 0.612212  | 0.114494 | 0.871324 | 0.63876  | 0.194378 | 0.112708 | 0.112392 | 0.019549 | 0.872029 | 0.568334 | 0.000071 | 0.233976 |          |  |
| 13GRT02              |         |          |          |          |          |          |          |          |          |          |          |          |          |          |          |          |          |            |          | 1        | 0.063354  | 0.459384 | 0.112714 | 0.266827 | 0.256124 | 0.047363 | 0.102007 | 0.121909 | 0.379189 | 0.068371 | 0.002096 | 0.181674 |          |  |
| 13GRT03              |         |          |          |          |          |          |          |          |          |          |          |          |          |          |          |          |          |            |          |          | 1         | 0.00678  | 0.9847   | 0.916912 | 0.009163 | 0.003941 | 0.007576 | 0.00462  | 0.437237 | 0.954373 | 1.88E-05 | 0.02569  |          |  |
| 13GRT04              |         |          |          |          |          |          |          |          |          |          |          |          |          |          |          |          |          |            |          |          |           | 1        | 0.012722 | 0.041648 | 0.004962 | 0.003143 | 0.003856 | 0.000789 | 0.180418 | 0.011663 | 0.311106 | 0.007649 |          |  |
| 13WSUN               |         |          |          |          |          |          |          |          |          |          |          |          |          |          |          |          |          |            |          |          |           |          |          | 1        | 0.988876 | 0.035758 | 0.00042  | 0.019779 | 0.009283 | 0.819465 | 0.921018 | 3.92E-05 | 0.037021 |  |
| 13WKEN               |         |          |          |          |          |          |          |          |          |          |          |          |          |          |          |          |          |            |          |          |           |          |          |          | 1        | 0.03112  | 0.015029 | 0.019004 | 0.014061 | 0.818339 | 0.826932 | 4.91E-05 | 0.029308 |  |
| 13GJR01              |         |          |          |          |          |          |          |          |          |          |          |          |          |          |          |          |          |            |          |          |           |          |          |          |          | 1        | 0.547988 | 0.302327 | 0.264227 | 0.153996 | 0.025355 | 0.26633  | 0.573947 |  |
| GJCOCE01             |         |          |          |          |          |          |          |          |          |          |          |          |          |          |          |          |          |            |          |          |           |          |          |          |          |          | 1        | 0.094539 | 0.154478 | 0.053189 | 0.007324 | 0.214576 | 0.308536 |  |
| 13GJC001             |         |          |          |          |          |          |          |          |          |          |          |          |          |          |          |          |          |            |          |          |           |          |          |          |          |          |          | 1        | 0.494998 | 0.087149 | 0.010989 | 0.004348 | 0.588735 |  |
| S3NESLEN             |         |          |          |          |          |          |          |          |          |          |          |          |          |          |          |          |          |            |          |          |           |          |          |          |          |          |          |          | 1        | 0.013694 | 0.003913 | 0.018532 | 0.69172  |  |
| S2SEGO               |         |          |          |          |          |          |          |          |          |          |          |          |          |          |          |          |          |            |          |          |           |          |          |          |          |          |          |          |          | 1        | 0.766371 | 0.000511 | 0.115568 |  |
| S1LOYD               |         |          |          |          |          |          |          |          |          |          |          |          |          |          |          |          |          |            |          |          |           |          |          |          |          |          |          |          |          |          | 1        | 4.78E-05 | 0.033406 |  |
| 13MARAP01            |         |          |          |          |          |          |          |          |          |          |          |          |          |          |          |          |          |            |          |          |           |          |          |          |          |          |          |          |          |          |          | 1        | 0.016739 |  |
| 13MEEI               |         |          |          |          |          |          |          |          |          |          |          |          |          |          |          |          |          |            |          |          |           |          |          |          |          |          |          |          |          |          |          |          | 1        |  |
|                      | 0       | 0        | 1        | 3        | 3        | 4        | 5        | 7        | 5        | 3        | 8        | 8        | 9        | 12       | 12       | 14       | 15       | 12         | 3        | 17       | 11        | 18       | 6        | 19       | 21       | 10       | 5        | 13       | 8        | 26       | 22       | 2        | 17       |  |
|                      | 0       | 1        | 2        | 3        | 4        | 5        | 6        | 7        | 8        | 9        | 10       | 11       | 12       | 13       | 14       | 15       | 16       | 17         | 18       | 19       | 20        | 21       | 22       | 23       | 24       | 25       | 26       | 27       | 28       | 29       | 30       | 31       | 32       |  |
| K-S test D statistic |         |          |          |          |          |          |          |          |          |          |          |          |          |          |          |          |          |            |          |          |           |          |          |          |          |          |          |          |          |          |          |          |          |  |
| 13PRUC               | 11UPR01 | 11UPR02  | 11UPR03  | 11UPR04  | 11UPR05  | 11UPR06  | 11UPR07  | Panthert | 11UCCR04 | Emery    | Ferron   | 11USS01  | 11USS02  | 11USS04  | 11USS05  | 11USS06  | 11USS07  | Bluecastle | 13GRT01  | 13GRT02  | 13GRT03   | 13GRT04  | 13WSUN   | 13WKEN   | 13GJR01  | GJCOCE01 | 13GJC001 | S3NESLEN | S2SEGO   | S1LOYD   | 13MARAPC | 13MEEI   |          |  |
| 13PRUC               | 0       | 0.       |          |          |          |          |          |          |          |          |          |          |          |          |          |          |          |            |          |          |           |          |          |          |          |          |          |          |          |          |          |          |          |  |

[illegible]K-S test  $\Phi$  statistic[illegible]
